# Supplementary material for: Familial Dilated Cardiomyopathy: A Novel MED9 Short Isoform Identification
Source: MDPI journal article supplement (doi:10.3390/ijms25053057), 2024-03-06
Supplement: s1 [file s1]

**Supplementary Table S1. Forward and Reverse oligonucleotides list used in the validation experiments.**

| <b>Primer name identifier</b>                                | <b>Forward (5'-3')</b> | <b>Reverse (5'-3')</b> | <b>Amplicon size (bp)</b> | <b>Tm (°C)</b> |
|--------------------------------------------------------------|------------------------|------------------------|---------------------------|----------------|
| <b>Mediator complex subunit9 full isoform (MED9full)</b>     | CTTTTGGCGACCCGACCTCT   | GATGGTAGTGGGGAGACAGG   | 542                       | 64             |
| <b>Mediator complex subunit9 short isoform (MED9short)</b>   | GAGGGAGGAAGAGAACTACT   | AAACACTTCTGCCCCACCTA   | 209                       | 60             |
| <b>GATA binding protein 4 (GATA4)</b>                        | TGTGCAGAGTTTGCCTCACA   | AGAACGAATGCCGAGTCCTG   | 238                       | 60             |
| <b>Fos proto-oncogene (FOS)</b>                              | GGGAGGACCTTATCTGTGCG   | ACACACTCCATGCGTTTTGC   | 121                       | 60             |
| <b>Zinc finger protein, FOG family member 2 (ZFPM2/FOG2)</b> | ATGTCCCGGCGAAAGC       | ATTCCACTTCTTCGCAGCTCA  | 184                       | 50             |
| <b>Inhibitor of DNA binding2 (ID2)</b>                       | GACTACATCTTGGACCTGCAG  | TGTTGTTGTTGTTGTTGTGCA  | 250                       | 62             |
| <b>Ribosomal protein S18 (RPS18)</b>                         | CGATGGGCGGCGGAAAATA    | CTGCTTTCCTCAACACCACA   | 86                        | 60             |

**Supplementary Table S2: Protein-coding genes.**

| Progression number | Ensembl Gene id | logFC        | logCPM      | F         | p value     |
|--------------------|-----------------|--------------|-------------|-----------|-------------|
| 1                  | ENSG00000000419 | -0,199256449 | 5,091509258 | 0,6485326 | 0,42884518  |
| 2                  | ENSG00000000457 | -0,152836378 | 4,016656855 | 1,3369877 | 0,351924024 |
| 3                  | ENSG00000000971 | 1,633589327  | 8,704127502 | 15,812934 | 0,000591823 |
| 4                  | ENSG00000001036 | -0,061573893 | 4,840865043 | 0,2862548 | 0,663501991 |
| 5                  | ENSG00000001084 | 0,016826466  | 4,786896831 | 0,023546  | 0,87937299  |
| 6                  | ENSG00000001167 | 0,206314616  | 4,276750435 | 2,9301117 | 0,165959165 |
| 7                  | ENSG00000001461 | 0,08971742   | 5,012484199 | 0,3442321 | 0,563083862 |
| 8                  | ENSG00000001497 | 0,07108952   | 4,205740051 | 0,3319027 | 0,679352241 |
| 9                  | ENSG00000001561 | -0,506861347 | 5,921573349 | 2,5573986 | 0,123361083 |
| 10                 | ENSG00000001629 | 0,107576853  | 6,004538683 | 0,9080594 | 0,350455948 |
| 11                 | ENSG00000001631 | 0,038222171  | 3,671497014 | 0,1222985 | 0,832757785 |
| 12                 | ENSG00000002549 | -0,427408447 | 6,133910747 | 8,5658016 | 0,007553658 |
| 13                 | ENSG00000002586 | -0,078343964 | 6,551945226 | 0,1824541 | 0,673225587 |
| 14                 | ENSG00000002834 | 0,434114424  | 5,273803568 | 2,9716227 | 0,098089473 |
| 15                 | ENSG00000002919 | -0,040356341 | 3,714066608 | 0,0836661 | 0,824613968 |
| 16                 | ENSG00000002933 | -0,400116848 | 5,323048357 | 0,7111988 | 0,407689476 |
| 17                 | ENSG00000003056 | 0,008446388  | 5,646271881 | 0,0046346 | 0,946306826 |
| 18                 | ENSG00000003096 | 0,111820968  | 3,936074885 | 0,34154   | 0,564603098 |
| 19                 | ENSG00000003147 | -0,100309783 | 5,667332947 | 0,256452  | 0,617364994 |
| 20                 | ENSG00000003393 | -0,042726014 | 6,329453498 | 0,0558959 | 0,815187095 |
| 21                 | ENSG00000003400 | -0,017481185 | 4,08152452  | 0,011791  | 0,914467727 |
| 22                 | ENSG00000003402 | -0,164862005 | 8,256201439 | 0,8344068 | 0,370419    |
| 23                 | ENSG00000003436 | -0,115329097 | 6,171541453 | 0,230116  | 0,635946103 |
| 24                 | ENSG00000003509 | -0,312887584 | 4,619907347 | 3,9219444 | 0,059684271 |
| 25                 | ENSG00000003756 | 0,095872579  | 6,389577609 | 0,5181768 | 0,478812102 |
| 26                 | ENSG00000003989 | 1,375299692  | 6,746102678 | 7,2014851 | 0,013231522 |
| 27                 | ENSG00000004059 | 0,028847042  | 4,540060277 | 0,0547343 | 0,884206091 |
| 28                 | ENSG00000004142 | -0,211200947 | 6,167486762 | 2,2627148 | 0,146017919 |
| 29                 | ENSG00000004399 | 0,280095159  | 5,67845056  | 1,3140498 | 0,263392416 |
| 30                 | ENSG00000004455 | -0,290428831 | 6,275131248 | 9,9555579 | 0,00439706  |
| 31                 | ENSG00000004478 | -0,246023164 | 5,334358696 | 1,791346  | 0,193780514 |
| 32                 | ENSG00000004487 | 0,097480374  | 5,650375893 | 1,3462319 | 0,322304043 |
| 33                 | ENSG00000004534 | -0,224758685 | 6,552985574 | 1,850799  | 0,186811546 |
| 34                 | ENSG00000004700 | 0,177229964  | 4,998190658 | 0,7846368 | 0,384850323 |
| 35                 | ENSG00000004766 | -0,27169866  | 5,474023266 | 1,3877528 | 0,250772302 |
| 36                 | ENSG00000004779 | -0,95226538  | 7,517724606 | 17,056995 | 0,000403808 |
| 37                 | ENSG00000004799 | 0,017049381  | 8,733744428 | 0,0008698 | 0,97672519  |
| 38                 | ENSG00000004864 | -0,149333943 | 4,137307368 | 1,6213599 | 0,316626649 |
| 39                 | ENSG00000004866 | -0,289911506 | 4,841809309 | 7,7588352 | 0,014436307 |
| 40                 | ENSG00000004897 | -0,087974353 | 6,47478882  | 0,3543029 | 0,557462891 |
| 41                 | ENSG00000004961 | -0,470808192 | 4,943393863 | 8,05181   | 0,009300147 |
| 42                 | ENSG00000005007 | 0,347771199  | 4,916177529 | 3,0880823 | 0,092107977 |
| 43                 | ENSG00000005020 | -0,805916526 | 4,646699432 | 25,172726 | 4,40952E-05 |
| 44                 | ENSG00000005022 | 0,078441294  | 5,968157235 | 0,4873541 | 0,492050242 |
| 45                 | ENSG00000005059 | -0,528406499 | 4,718700642 | 5,4291732 | 0,028891338 |
| 46                 | ENSG00000005075 | -0,171757179 | 4,750567924 | 1,5447228 | 0,226334573 |
| 47                 | ENSG00000005100 | 0,01744212   | 3,68883388  | 0,0189947 | 0,946657694 |
| 48                 | ENSG00000005102 | -0,564110722 | 4,53612932  | 4,761504  | 0,039521787 |
| 49                 | ENSG00000005108 | -0,060140858 | 3,963465577 | 0,0422425 | 0,838957755 |
| 50                 | ENSG00000005156 | 0,115959127  | 4,38970674  | 0,3956591 | 0,535507652 |
| 51                 | ENSG00000005175 | -0,412342765 | 4,894860905 | 5,9420397 | 0,022884915 |
| 52                 | ENSG00000005187 | -0,594328837 | 4,277866425 | 2,7947568 | 0,108058909 |
| 53                 | ENSG00000005194 | -0,224895428 | 5,016480657 | 4,0253043 | 0,056619737 |
| 54                 | ENSG00000005243 | 0,516230236  | 4,484962277 | 15,50719  | 0,000648095 |
| 55                 | ENSG00000005249 | 0,226872236  | 6,728901227 | 0,2068115 | 0,653520695 |
| 56                 | ENSG00000005302 | -0,189579994 | 4,204498594 | 2,7369609 | 0,235568351 |
| 57                 | ENSG00000005339 | 0,064194376  | 5,706524678 | 0,0694518 | 0,794471911 |

|     |                 |              |             |           |             |
|-----|-----------------|--------------|-------------|-----------|-------------|
| 58  | ENSG00000005436 | -0,011524817 | 4,94413859  | 0,0089674 | 0,933614492 |
| 59  | ENSG00000005469 | 0,139640863  | 3,985188835 | 1,1516893 | 0,390279749 |
| 60  | ENSG00000005471 | -0,089297797 | 4,167596301 | 0,1134574 | 0,739281152 |
| 61  | ENSG00000005483 | 0,205020473  | 6,664616281 | 3,4925116 | 0,074328072 |
| 62  | ENSG00000005700 | -0,173968284 | 6,733535563 | 0,9746076 | 0,333756518 |
| 63  | ENSG00000005801 | -0,304920407 | 4,730843    | 7,6280811 | 0,015452148 |
| 64  | ENSG00000005810 | 0,032106955  | 7,727148324 | 0,0441197 | 0,835465284 |
| 65  | ENSG00000005812 | -0,000916589 | 5,858793878 | 2,589E-05 | 0,995983625 |
| 66  | ENSG00000005882 | 0,077241818  | 5,300138186 | 0,1407124 | 0,710994118 |
| 67  | ENSG00000005884 | 0,420485472  | 4,710923939 | 5,7402753 | 0,025063789 |
| 68  | ENSG00000005889 | -0,138505216 | 6,181673606 | 0,721     | 0,404525412 |
| 69  | ENSG00000005893 | -0,142922469 | 6,575563591 | 0,9316415 | 0,344414091 |
| 70  | ENSG00000006007 | -0,220075088 | 6,187110725 | 3,4437554 | 0,076242894 |
| 71  | ENSG00000006042 | 0,818549331  | 4,67473964  | 11,163145 | 0,002821611 |
| 72  | ENSG00000006125 | 0,071416408  | 7,195354024 | 0,385007  | 0,540985263 |
| 73  | ENSG00000006194 | 0,198266949  | 4,211068189 | 1,5133516 | 0,238844725 |
| 74  | ENSG00000006282 | 0,290590691  | 5,304233236 | 1,3977267 | 0,249125004 |
| 75  | ENSG00000006327 | 0,262988194  | 4,473417956 | 0,4126542 | 0,526946571 |
| 76  | ENSG00000006451 | 0,14161386   | 4,784902187 | 1,1835236 | 0,287815828 |
| 77  | ENSG00000006459 | 0,040766478  | 5,975460516 | 0,0647205 | 0,801434533 |
| 78  | ENSG00000006468 | 0,025062391  | 6,215162365 | 0,0079908 | 0,929540907 |
| 79  | ENSG00000006530 | -0,103337502 | 5,34111081  | 0,4924769 | 0,489831354 |
| 80  | ENSG00000006576 | -0,108620444 | 5,164165099 | 0,6317701 | 0,434771323 |
| 81  | ENSG00000006607 | 0,22183164   | 4,543794084 | 2,5401187 | 0,12915825  |
| 82  | ENSG00000006652 | 0,212930644  | 5,740576668 | 1,2093455 | 0,282784539 |
| 83  | ENSG00000006695 | -0,188478923 | 4,796243104 | 0,9684256 | 0,335263237 |
| 84  | ENSG00000006712 | 0,010863528  | 4,986318928 | 0,0066919 | 0,958140061 |
| 85  | ENSG00000006715 | 0,13277102   | 6,041608834 | 1,4195181 | 0,245532284 |
| 86  | ENSG00000006744 | -0,183371305 | 5,634447751 | 1,5779001 | 0,22159504  |
| 87  | ENSG00000006757 | -0,090868338 | 4,224199498 | 0,2894229 | 0,595733612 |
| 88  | ENSG00000006831 | 0,148024151  | 5,972941675 | 0,7907428 | 0,383037634 |
| 89  | ENSG00000007062 | -0,333873979 | 4,5166104   | 1,2585649 | 0,27344308  |
| 90  | ENSG00000007168 | -0,017738541 | 7,274777985 | 0,0322689 | 0,858998851 |
| 91  | ENSG00000007202 | -0,008166398 | 6,697615757 | 0,0028213 | 0,958096272 |
| 92  | ENSG00000007237 | -0,121166416 | 6,996775077 | 0,2692392 | 0,608775515 |
| 93  | ENSG00000007341 | -0,166007539 | 4,257366818 | 2,2143895 | 0,277329653 |
| 94  | ENSG00000007392 | -0,048286837 | 5,024941596 | 0,081021  | 0,778453258 |
| 95  | ENSG00000007908 | -1,525910618 | 4,80787733  | 5,2966891 | 0,030716041 |
| 96  | ENSG00000007923 | -0,311290676 | 4,930789565 | 2,4420885 | 0,131708423 |
| 97  | ENSG00000007944 | 0,05573359   | 4,649173457 | 0,1234188 | 0,728538045 |
| 98  | ENSG00000008018 | -0,1901598   | 6,567987553 | 1,3800219 | 0,252058814 |
| 99  | ENSG00000008083 | -0,17328236  | 4,353162399 | 1,0691437 | 0,311837299 |
| 100 | ENSG00000008086 | 0,01137384   | 5,048047124 | 0,0051874 | 0,943202728 |
| 101 | ENSG00000008130 | -0,071369807 | 4,833721863 | 0,0896883 | 0,767250354 |
| 102 | ENSG00000008256 | 0,452885164  | 5,113454941 | 7,7143486 | 0,010680367 |
| 103 | ENSG00000008277 | 0,162539038  | 3,762412573 | 0,841518  | 0,374505429 |
| 104 | ENSG00000008282 | -0,318567644 | 6,349202281 | 3,8385343 | 0,062257386 |
| 105 | ENSG00000008294 | 0,162538783  | 7,263505546 | 1,8107177 | 0,191430065 |
| 106 | ENSG00000008311 | -0,506347536 | 6,122014934 | 8,1253016 | 0,009026409 |
| 107 | ENSG00000008394 | 0,236591627  | 5,870681625 | 0,1824342 | 0,673242271 |
| 108 | ENSG00000008405 | -0,058466437 | 4,431722012 | 0,0391265 | 0,844927642 |
| 109 | ENSG00000008441 | 0,608141764  | 5,444029529 | 4,2537298 | 0,050577878 |
| 110 | ENSG00000008513 | 0,093828597  | 7,157428296 | 0,286932  | 0,597310712 |
| 111 | ENSG00000008517 | -0,025982547 | 4,642435408 | 0,0057379 | 0,940270803 |
| 112 | ENSG00000008710 | 0,725889417  | 5,512456808 | 5,1209397 | 0,033338721 |
| 113 | ENSG00000008838 | 0,049598894  | 4,941028667 | 0,0845333 | 0,7738384   |
| 114 | ENSG00000008853 | 0,130432196  | 4,644880743 | 0,2484905 | 0,622850722 |
| 115 | ENSG00000008869 | -0,076622264 | 5,82735905  | 0,4775208 | 0,496405995 |
| 116 | ENSG00000008952 | 0,167953812  | 6,984327701 | 0,9831641 | 0,331686611 |

|     |                 |              |             |           |             |
|-----|-----------------|--------------|-------------|-----------|-------------|
| 117 | ENSG00000008988 | 0,175565113  | 8,64379239  | 0,5217992 | 0,477321055 |
| 118 | ENSG00000009307 | -0,013174347 | 9,700785331 | 0,006339  | 0,937223933 |
| 119 | ENSG00000009335 | -0,059881315 | 6,402144712 | 0,2402114 | 0,628657622 |
| 120 | ENSG00000009413 | -0,145371237 | 6,589941398 | 1,6550854 | 0,210961768 |
| 121 | ENSG00000009780 | -0,028570326 | 4,097873321 | 0,0649938 | 0,83989676  |
| 122 | ENSG00000009844 | -0,332465979 | 5,322482529 | 2,2778041 | 0,144787633 |
| 123 | ENSG00000009954 | 0,220621454  | 6,471675845 | 2,9182477 | 0,100934072 |
| 124 | ENSG00000010017 | 0,051933064  | 5,336681483 | 0,1551324 | 0,697275848 |
| 125 | ENSG00000010072 | -0,347077142 | 3,761860775 | 6,6774684 | 0,060285918 |
| 126 | ENSG00000010165 | -0,211004106 | 4,020553674 | 2,0511628 | 0,182894456 |
| 127 | ENSG00000010219 | -0,070253303 | 3,842976771 | 0,1893819 | 0,726444385 |
| 128 | ENSG00000010244 | -0,106129403 | 7,142178007 | 0,4644922 | 0,502304515 |
| 129 | ENSG00000010256 | -0,482931023 | 7,947767579 | 4,6673537 | 0,04134744  |
| 130 | ENSG00000010270 | -0,134096919 | 5,013235455 | 0,6810916 | 0,417648102 |
| 131 | ENSG00000010278 | 0,768914305  | 5,829252543 | 13,331264 | 0,001323954 |
| 132 | ENSG00000010282 | -0,328151999 | 7,710261215 | 2,7163515 | 0,112853561 |
| 133 | ENSG00000010292 | 0,291342294  | 4,242886493 | 2,3085642 | 0,142225076 |
| 134 | ENSG00000010319 | 0,045231076  | 4,211211179 | 0,0432063 | 0,837157967 |
| 135 | ENSG00000010322 | 0,352681261  | 5,544931184 | 3,7470781 | 0,065224956 |
| 136 | ENSG00000010327 | -0,260926484 | 6,168571399 | 1,2019654 | 0,284221413 |
| 137 | ENSG00000010404 | 0,338811135  | 3,649595588 | 3,8741627 | 0,084523272 |
| 138 | ENSG00000010610 | 0,26702174   | 4,148538762 | 1,0221396 | 0,32247961  |
| 139 | ENSG00000010803 | -0,038874149 | 5,465973386 | 0,0790828 | 0,781039386 |
| 140 | ENSG00000010810 | 0,043194064  | 5,632929539 | 0,0656222 | 0,800087181 |
| 141 | ENSG00000010818 | -0,08628089  | 6,008570505 | 0,2858071 | 0,598025821 |
| 142 | ENSG00000011007 | 0,131481926  | 5,163246815 | 1,0459764 | 0,31698499  |
| 143 | ENSG00000011021 | 0,040176933  | 4,940503998 | 0,0244407 | 0,877126428 |
| 144 | ENSG00000011028 | 0,555664218  | 5,517290604 | 3,6819628 | 0,067436158 |
| 145 | ENSG00000011105 | -0,016928288 | 6,842144403 | 0,0047919 | 0,94540695  |
| 146 | ENSG00000011114 | 0,082010731  | 5,449416539 | 0,4581073 | 0,505204733 |
| 147 | ENSG00000011198 | -0,020063571 | 5,587928616 | 0,0072854 | 0,932714612 |
| 148 | ENSG00000011201 | 0,677011816  | 4,393606666 | 5,053924  | 0,034404068 |
| 149 | ENSG00000011243 | -0,16309278  | 4,514605198 | 0,9383023 | 0,34274274  |
| 150 | ENSG00000011258 | 0,233847686  | 4,766544173 | 3,6696934 | 0,067818429 |
| 151 | ENSG00000011260 | 0,021721329  | 3,964942358 | 0,0194323 | 0,890341892 |
| 152 | ENSG00000011275 | 0,342119857  | 5,968479621 | 6,1252182 | 0,02106194  |
| 153 | ENSG00000011295 | -0,154996101 | 5,643531809 | 1,9738425 | 0,17329282  |
| 154 | ENSG00000011304 | 0,114928762  | 5,126802396 | 0,3640762 | 0,552127098 |
| 155 | ENSG00000011347 | -0,649100256 | 4,630214127 | 5,5728177 | 0,027048499 |
| 156 | ENSG00000011376 | 0,102065783  | 4,523414044 | 0,5350909 | 0,561201872 |
| 157 | ENSG00000011405 | -0,188558689 | 6,886994256 | 1,9463607 | 0,17619638  |
| 158 | ENSG00000011454 | 0,129929796  | 6,355185205 | 1,913553  | 0,179740676 |
| 159 | ENSG00000011465 | -0,098564377 | 10,5828003  | 0,149895  | 0,702170433 |
| 160 | ENSG00000011485 | 0,149765096  | 5,086862278 | 0,982887  | 0,331753352 |
| 161 | ENSG00000011523 | 0,074437105  | 5,458432161 | 0,3118223 | 0,581915293 |
| 162 | ENSG00000011566 | -0,130108766 | 6,202604859 | 0,6084453 | 0,443288973 |
| 163 | ENSG00000011638 | 0,19428148   | 5,596887517 | 1,5612215 | 0,223992072 |
| 164 | ENSG00000012048 | -0,184404496 | 3,986014168 | 0,8958974 | 0,353675525 |
| 165 | ENSG00000012061 | -0,157978336 | 5,363302071 | 0,6436293 | 0,430571829 |
| 166 | ENSG00000012171 | 0,065264699  | 4,48705891  | 0,0811319 | 0,778305991 |
| 167 | ENSG00000012174 | -0,079898284 | 4,483572673 | 0,4054618 | 0,632889673 |
| 168 | ENSG00000012232 | 0,075952683  | 5,949766427 | 0,1406124 | 0,711091914 |
| 169 | ENSG00000012660 | -0,122720676 | 6,07687164  | 0,2335928 | 0,633419531 |
| 170 | ENSG00000012817 | 0,293159072  | 5,505948359 | 0,2884066 | 0,596376033 |
| 171 | ENSG00000012822 | 0,042251247  | 6,788820244 | 0,0816481 | 0,777617908 |
| 172 | ENSG00000012963 | 0,140502851  | 4,836276144 | 2,1822761 | 0,266020073 |
| 173 | ENSG00000012983 | 0,139126674  | 5,145696939 | 0,6385681 | 0,43236554  |
| 174 | ENSG00000013016 | 0,38299052   | 4,29839878  | 3,4256463 | 0,077013466 |
| 175 | ENSG00000013275 | -0,05097615  | 5,30405701  | 0,164246  | 0,688990977 |

|     |                 |              |             |           |             |
|-----|-----------------|--------------|-------------|-----------|-------------|
| 176 | ENSG00000013288 | 0,339577663  | 4,839091371 | 4,4519548 | 0,045892323 |
| 177 | ENSG00000013306 | 0,080632203  | 4,815994387 | 0,3301177 | 0,663100466 |
| 178 | ENSG00000013364 | -0,032889916 | 5,703223634 | 0,0203476 | 0,887806848 |
| 179 | ENSG00000013374 | 0,133426535  | 5,386996267 | 1,7945704 | 0,193349413 |
| 180 | ENSG00000013375 | 0,086765989  | 5,490257727 | 0,1569671 | 0,695598266 |
| 181 | ENSG00000013441 | 0,030202438  | 6,909077479 | 0,017716  | 0,895265208 |
| 182 | ENSG00000013503 | -0,012358331 | 4,141548994 | 0,0124269 | 0,973939302 |
| 183 | ENSG00000013523 | 0,144551205  | 4,710086435 | 0,4849626 | 0,493127568 |
| 184 | ENSG00000013561 | -0,162618574 | 6,128387822 | 1,0092742 | 0,325479261 |
| 185 | ENSG00000013583 | -0,103945113 | 4,486701328 | 0,4066268 | 0,529953764 |
| 186 | ENSG00000013588 | 0,158252453  | 4,459364556 | 0,0632874 | 0,803596897 |
| 187 | ENSG00000014123 | -0,054244257 | 6,027861653 | 0,044032  | 0,835632835 |
| 188 | ENSG00000014216 | 0,084662192  | 5,250769562 | 0,2097789 | 0,651217785 |
| 189 | ENSG00000014641 | -0,547964899 | 9,68261639  | 3,6182035 | 0,06968459  |
| 190 | ENSG00000014824 | -0,276680211 | 6,906535476 | 1,259111  | 0,273341726 |
| 191 | ENSG00000014919 | 0,117747945  | 4,707446189 | 1,0903373 | 0,35452513  |
| 192 | ENSG00000015153 | -0,192957229 | 6,098809393 | 1,0237749 | 0,322101052 |
| 193 | ENSG00000015171 | 0,124248919  | 6,795436662 | 1,8071842 | 0,191848065 |
| 194 | ENSG00000015475 | -0,239179364 | 3,797705108 | 3,6940625 | 0,201065711 |
| 195 | ENSG00000015479 | -0,085024577 | 4,778749725 | 0,1502668 | 0,70182747  |
| 196 | ENSG00000015568 | -0,061707471 | 7,595288141 | 0,1953896 | 0,662562432 |
| 197 | ENSG00000015676 | 0,065707944  | 6,16176621  | 0,1811696 | 0,674307306 |
| 198 | ENSG00000016864 | 0,076522077  | 5,029715456 | 0,6704211 | 0,449354947 |
| 199 | ENSG00000017260 | 0,063741217  | 6,89199524  | 0,1386678 | 0,713001764 |
| 200 | ENSG00000017797 | 0,156081217  | 6,056116412 | 3,0221414 | 0,095394674 |
| 201 | ENSG00000018189 | -0,231570093 | 6,006580026 | 3,5377136 | 0,072601901 |
| 202 | ENSG00000018408 | 0,2745314    | 6,31996647  | 2,4309927 | 0,132546354 |
| 203 | ENSG00000018510 | 0,017460532  | 5,910293108 | 0,0081444 | 0,928868974 |
| 204 | ENSG00000018610 | 0,142281847  | 4,127193841 | 0,9569895 | 0,343035846 |
| 205 | ENSG00000018625 | -0,391107289 | 7,371203876 | 2,2104318 | 0,150595628 |
| 206 | ENSG00000018699 | 0,010568933  | 4,271736167 | 0,006596  | 0,935967042 |
| 207 | ENSG00000019144 | 0,276490056  | 6,316839975 | 0,9197998 | 0,347453431 |
| 208 | ENSG00000019485 | 0,44381741   | 4,119165276 | 3,9451696 | 0,05898947  |
| 209 | ENSG00000019582 | 0,719503003  | 8,016204123 | 4,2041513 | 0,051832775 |
| 210 | ENSG00000019991 | -0,243992866 | 4,446909491 | 0,5173981 | 0,479164081 |
| 211 | ENSG00000019995 | -0,218998713 | 5,257528933 | 1,9610639 | 0,174681551 |
| 212 | ENSG00000020426 | -0,197958366 | 4,523297773 | 1,4123811 | 0,246729837 |
| 213 | ENSG00000020577 | 0,24564107   | 7,356314124 | 1,0620439 | 0,313413686 |
| 214 | ENSG00000020922 | 0,016933552  | 4,794933648 | 0,0283212 | 0,867814732 |
| 215 | ENSG00000021355 | -0,3076798   | 5,585834622 | 1,9177308 | 0,17933025  |
| 216 | ENSG00000021574 | 0,125470127  | 4,465119696 | 0,6845899 | 0,416469302 |
| 217 | ENSG00000021776 | -0,069771895 | 5,902649081 | 0,3451982 | 0,562520863 |
| 218 | ENSG00000022267 | -0,210262063 | 9,628790897 | 0,394993  | 0,535848432 |
| 219 | ENSG00000022277 | -0,15171734  | 5,624585484 | 1,7669279 | 0,196690554 |
| 220 | ENSG00000022567 | 0,141828728  | 4,113103277 | 0,74604   | 0,396608106 |
| 221 | ENSG00000022840 | -0,218416647 | 7,067392822 | 1,4265822 | 0,244436925 |
| 222 | ENSG00000023041 | -0,080509619 | 4,808186964 | 0,5132527 | 0,60169468  |
| 223 | ENSG00000023191 | 0,252607408  | 6,184729428 | 1,2626174 | 0,272692161 |
| 224 | ENSG00000023228 | -0,250696146 | 8,618699905 | 1,0195045 | 0,323090873 |
| 225 | ENSG00000023287 | -0,153620853 | 7,255361849 | 0,6798998 | 0,418049946 |
| 226 | ENSG00000023318 | -0,092869903 | 5,697436363 | 0,6425663 | 0,430919328 |
| 227 | ENSG00000023330 | -0,41404445  | 6,258453132 | 4,7682984 | 0,039393586 |
| 228 | ENSG00000023445 | 0,66854823   | 5,381249976 | 1,7121289 | 0,203572328 |
| 229 | ENSG00000023516 | 0,208562307  | 7,036419805 | 3,6111629 | 0,069893913 |
| 230 | ENSG00000023572 | 0,012695527  | 4,630419959 | 0,0071278 | 0,933444532 |
| 231 | ENSG00000023608 | 0,102211043  | 3,615316314 | 0,3872077 | 0,606755623 |
| 232 | ENSG00000023697 | -0,096233122 | 4,148278904 | 0,4466773 | 0,636308423 |
| 233 | ENSG00000023734 | -0,265771508 | 6,385486655 | 5,5896456 | 0,026808923 |
| 234 | ENSG00000023902 | 0,029118503  | 4,928451907 | 0,0232257 | 0,880194211 |

|     |                 |              |             |           |             |
|-----|-----------------|--------------|-------------|-----------|-------------|
| 235 | ENSG00000023909 | -0,01881597  | 4,223985057 | 0,0097977 | 0,922004917 |
| 236 | ENSG00000024048 | -0,054662499 | 6,812255438 | 0,2231846 | 0,641039003 |
| 237 | ENSG00000024422 | 0,039606768  | 5,223827045 | 0,021067  | 0,885854985 |
| 238 | ENSG00000024862 | 0,268488028  | 3,720171154 | 4,0574114 | 0,147481633 |
| 239 | ENSG00000025039 | -0,330086326 | 6,864738485 | 2,0424477 | 0,166340564 |
| 240 | ENSG00000025156 | -0,806576454 | 5,621157828 | 14,304522 | 0,000958553 |
| 241 | ENSG00000025293 | -0,110058029 | 5,7664381   | 1,0696279 | 0,311693213 |
| 242 | ENSG00000025434 | -0,174799862 | 3,672342283 | 0,5367003 | 0,471168236 |
| 243 | ENSG00000025796 | 0,15996815   | 6,336709093 | 1,6913422 | 0,206198433 |
| 244 | ENSG00000025800 | -0,158000649 | 6,523517266 | 1,2386588 | 0,27714038  |
| 245 | ENSG00000026025 | 0,618249197  | 8,734513203 | 3,7622618 | 0,064721303 |
| 246 | ENSG00000026103 | 0,402308347  | 4,099242042 | 1,8305735 | 0,1891472   |
| 247 | ENSG00000026508 | -0,028949323 | 6,230649077 | 0,0080225 | 0,929401834 |
| 248 | ENSG00000026652 | -0,195377277 | 3,805036453 | 0,8536289 | 0,365073615 |
| 249 | ENSG00000026950 | 0,756081799  | 4,602196769 | 10,862424 | 0,003147774 |
| 250 | ENSG00000027001 | 0,072205584  | 4,95235523  | 0,1292267 | 0,722498744 |
| 251 | ENSG00000027075 | 0,259650413  | 4,855299961 | 4,4000879 | 0,047029313 |
| 252 | ENSG00000027697 | -0,315310896 | 7,19047805  | 4,2617315 | 0,050363511 |
| 253 | ENSG00000028116 | -0,331270315 | 4,456164885 | 5,3026275 | 0,030611104 |
| 254 | ENSG00000028137 | -0,269638367 | 4,766718867 | 1,408431  | 0,247372529 |
| 255 | ENSG00000028203 | -0,195424896 | 6,483769179 | 0,8852258 | 0,356504684 |
| 256 | ENSG00000028310 | 0,070048258  | 4,656376885 | 0,2153237 | 0,646966559 |
| 257 | ENSG00000028528 | 0,292882343  | 6,747624121 | 5,0257669 | 0,034827076 |
| 258 | ENSG00000028839 | 0,014978896  | 3,744871404 | 0,0072528 | 0,932864931 |
| 259 | ENSG00000029363 | -0,045315963 | 7,476080753 | 0,0599944 | 0,808666419 |
| 260 | ENSG00000029364 | 0,120781706  | 5,64823143  | 0,6855111 | 0,416151179 |
| 261 | ENSG00000029534 | -0,040021678 | 4,925118558 | 0,0115214 | 0,915447251 |
| 262 | ENSG00000029725 | -0,039347392 | 6,244146509 | 0,1054038 | 0,748348837 |
| 263 | ENSG00000030066 | 0,075557277  | 5,352508759 | 0,4189737 | 0,523804911 |
| 264 | ENSG00000030419 | -0,045600606 | 4,576216184 | 0,0940254 | 0,868814881 |
| 265 | ENSG00000030582 | -0,081797173 | 6,22644595  | 0,1502055 | 0,701885199 |
| 266 | ENSG00000031003 | -0,172010193 | 6,40124564  | 1,224243  | 0,279913245 |
| 267 | ENSG00000031081 | -0,185146547 | 6,157284253 | 0,7620279 | 0,391673767 |
| 268 | ENSG00000031698 | -0,211206171 | 6,604697409 | 2,724003  | 0,112327814 |
| 269 | ENSG00000031823 | 0,018341206  | 4,824155085 | 0,014672  | 0,904636645 |
| 270 | ENSG00000032219 | 0,016772592  | 5,562004855 | 0,0171928 | 0,896809945 |
| 271 | ENSG00000032742 | 0,306825451  | 4,449850516 | 2,7951868 | 0,108033275 |
| 272 | ENSG00000033030 | 0,11887642   | 4,38464632  | 0,9784442 | 0,424587766 |
| 273 | ENSG00000033100 | 0,423616218  | 4,416394221 | 5,152979  | 0,032842486 |
| 274 | ENSG00000033122 | -1,181041794 | 4,204292219 | 10,113754 | 0,004154337 |
| 275 | ENSG00000033170 | -0,09727992  | 4,442805481 | 0,684983  | 0,531432001 |
| 276 | ENSG00000033178 | -0,059807323 | 5,785630873 | 0,0715032 | 0,791532223 |
| 277 | ENSG00000033327 | 0,548835176  | 5,118732867 | 8,1981026 | 0,008763975 |
| 278 | ENSG00000033627 | 0,172464072  | 5,661404835 | 1,5336588 | 0,227962566 |
| 279 | ENSG00000033800 | -0,131321259 | 5,63681662  | 1,4807273 | 0,235898392 |
| 280 | ENSG00000033867 | -0,316611964 | 5,996520504 | 1,9355864 | 0,17739668  |
| 281 | ENSG00000034152 | -0,33534637  | 5,224204402 | 1,7115142 | 0,203650677 |
| 282 | ENSG00000034510 | -0,184555309 | 7,586244521 | 0,5994203 | 0,446647197 |
| 283 | ENSG00000034677 | -0,246716545 | 6,429975091 | 2,2002395 | 0,151498379 |
| 284 | ENSG00000034693 | -0,191126993 | 4,349340689 | 1,1975241 | 0,285090784 |
| 285 | ENSG00000034713 | -0,032167974 | 6,595692763 | 0,0774278 | 0,783279554 |
| 286 | ENSG00000034971 | -1,144676814 | 5,054250544 | 9,371856  | 0,005510844 |
| 287 | ENSG00000035115 | 0,054833648  | 4,595494552 | 0,1567442 | 0,698257821 |
| 288 | ENSG00000035141 | -0,184534752 | 4,254838325 | 1,6516078 | 0,277640426 |
| 289 | ENSG00000035403 | 0,032492158  | 8,09717349  | 0,0323431 | 0,858843806 |
| 290 | ENSG00000035664 | -0,703268107 | 6,612301783 | 7,8984442 | 0,009901371 |
| 291 | ENSG00000035681 | -0,074333508 | 5,195822498 | 0,7799908 | 0,501930573 |
| 292 | ENSG00000035687 | 0,12447786   | 4,278994406 | 0,4145553 | 0,526004543 |
| 293 | ENSG00000035862 | 0,348624908  | 7,031062505 | 2,5465728 | 0,12411765  |

|     |                 |              |             |           |             |
|-----|-----------------|--------------|-------------|-----------|-------------|
| 294 | ENSG00000035928 | 0,027696198  | 5,948209961 | 0,0419249 | 0,839549123 |
| 295 | ENSG00000036054 | -0,07112324  | 5,693818412 | 0,0909564 | 0,765661568 |
| 296 | ENSG00000036257 | -0,023553132 | 6,06005356  | 0,0416484 | 0,8400716   |
| 297 | ENSG00000036448 | 0,310823201  | 9,584466893 | 0,8345994 | 0,370378004 |
| 298 | ENSG00000036549 | -0,066525402 | 6,110314445 | 0,1487952 | 0,703216993 |
| 299 | ENSG00000036672 | -0,544310794 | 4,969878572 | 3,0800563 | 0,092506376 |
| 300 | ENSG00000037474 | -0,050218306 | 5,114918224 | 0,1916841 | 0,665568768 |
| 301 | ENSG00000037637 | -0,145559844 | 4,919251123 | 1,2157469 | 0,281506789 |
| 302 | ENSG00000037749 | -0,127383609 | 5,248748542 | 0,6207922 | 0,438759367 |
| 303 | ENSG00000038210 | 0,217411588  | 3,737739972 | 1,4845886 | 0,235349411 |
| 304 | ENSG00000038219 | 0,128667534  | 6,627085866 | 1,3445064 | 0,25803888  |
| 305 | ENSG00000038274 | -0,292351824 | 6,154893403 | 3,8186021 | 0,062886919 |
| 306 | ENSG00000038295 | 0,816455868  | 4,064100238 | 2,9284945 | 0,1004181   |
| 307 | ENSG00000038358 | 0,251375405  | 3,844330729 | 1,1146994 | 0,301974271 |
| 308 | ENSG00000038382 | 0,004448324  | 6,512651778 | 0,0007158 | 0,978884784 |
| 309 | ENSG00000038427 | 0,02661029   | 8,386565577 | 0,0077699 | 0,93051907  |
| 310 | ENSG00000038532 | -0,007722982 | 4,583954304 | 0,0024212 | 0,961178373 |
| 311 | ENSG00000038945 | 0,177580862  | 4,823553646 | 0,3697417 | 0,549074209 |
| 312 | ENSG00000039123 | -0,283821902 | 6,400918863 | 1,8530879 | 0,186549462 |
| 313 | ENSG00000039319 | -0,095067607 | 7,003484945 | 0,2092843 | 0,651600236 |
| 314 | ENSG00000039523 | 0,165341934  | 4,819613378 | 0,5455497 | 0,467576462 |
| 315 | ENSG00000039537 | -0,938031088 | 6,806228217 | 11,783851 | 0,002259363 |
| 316 | ENSG00000039560 | 0,489484824  | 4,561905587 | 4,0407906 | 0,056224028 |
| 317 | ENSG00000040199 | 0,922630999  | 4,64953272  | 5,7771817 | 0,024648546 |
| 318 | ENSG00000040341 | -0,325337412 | 6,478245421 | 2,7410534 | 0,111316624 |
| 319 | ENSG00000040933 | 0,083116399  | 5,109534863 | 0,2948745 | 0,592312445 |
| 320 | ENSG00000041357 | -0,288295574 | 6,011894892 | 1,8164627 | 0,190798002 |
| 321 | ENSG00000041802 | -0,272878176 | 4,879230157 | 7,1848602 | 0,021606674 |
| 322 | ENSG00000041982 | 1,445359206  | 4,683279039 | 15,564909 | 0,000639728 |
| 323 | ENSG00000042286 | 0,242925818  | 4,248120277 | 0,7069401 | 0,409075999 |
| 324 | ENSG00000042317 | 0,160592383  | 4,145123954 | 1,0013796 | 0,327339004 |
| 325 | ENSG00000042429 | 0,043537575  | 3,611158702 | 0,0549984 | 0,852486606 |
| 326 | ENSG00000042445 | 0,231755488  | 6,033922737 | 0,4238116 | 0,521461511 |
| 327 | ENSG00000042753 | -0,227456182 | 4,398123217 | 1,4966074 | 0,233520664 |
| 328 | ENSG00000042781 | -0,047198045 | 4,325750274 | 0,0261235 | 0,873003623 |
| 329 | ENSG00000043093 | -0,143795398 | 5,96982987  | 0,3831185 | 0,541992225 |
| 330 | ENSG00000043143 | 0,200688416  | 4,855027175 | 0,9032418 | 0,351746982 |
| 331 | ENSG00000043462 | -0,084869658 | 3,725391951 | 0,1278359 | 0,723930743 |
| 332 | ENSG00000043514 | -0,326347522 | 4,656901939 | 5,4928509 | 0,028030432 |
| 333 | ENSG00000043591 | -0,325645071 | 4,67912717  | 1,0708512 | 0,311459788 |
| 334 | ENSG00000044090 | 0,485465247  | 3,870629735 | 5,9359353 | 0,022947657 |
| 335 | ENSG00000044115 | 0,110676977  | 8,232350332 | 0,7631174 | 0,391309763 |
| 336 | ENSG00000044446 | 0,050271546  | 4,708565041 | 0,079195  | 0,780895402 |
| 337 | ENSG00000044459 | -0,023228365 | 4,625392527 | 0,0272558 | 0,943906475 |
| 338 | ENSG00000044524 | 1,173205762  | 5,027586953 | 13,296589 | 0,001339518 |
| 339 | ENSG00000044574 | -0,305835169 | 8,367223185 | 1,246542  | 0,275686929 |
| 340 | ENSG00000046604 | 0,069790128  | 6,573178097 | 0,2696148 | 0,608510027 |
| 341 | ENSG00000046651 | 0,17911479   | 4,694899136 | 1,8804137 | 0,183409612 |
| 342 | ENSG00000046653 | -0,133599879 | 4,48213222  | 0,3632829 | 0,55255715  |
| 343 | ENSG00000046889 | -0,155147095 | 6,029598877 | 0,9135046 | 0,349077024 |
| 344 | ENSG00000047056 | 0,15633962   | 5,254106558 | 1,1678759 | 0,290970255 |
| 345 | ENSG00000047188 | -0,125793895 | 5,795483524 | 0,8714044 | 0,360183721 |
| 346 | ENSG00000047230 | 0,198520049  | 4,078975798 | 2,5228671 | 0,208149294 |
| 347 | ENSG00000047249 | 0,012838683  | 5,12116155  | 0,0182097 | 0,949664129 |
| 348 | ENSG00000047315 | -0,231455549 | 6,871811785 | 1,6129518 | 0,216714866 |
| 349 | ENSG00000047346 | 0,187802599  | 6,129326049 | 1,291625  | 0,267395338 |
| 350 | ENSG00000047365 | 0,786296495  | 4,794545446 | 3,6600727 | 0,068198625 |
| 351 | ENSG00000047410 | 0,208395975  | 7,656086715 | 2,6633858 | 0,116186552 |
| 352 | ENSG00000047457 | 2,357953407  | 4,458205859 | 39,425902 | 2,04199E-06 |

|     |                 |              |             |           |             |
|-----|-----------------|--------------|-------------|-----------|-------------|
| 353 | ENSG00000047578 | 0,487988372  | 3,955270633 | 7,1065542 | 0,013774034 |
| 354 | ENSG00000047597 | -0,289896615 | 3,63455884  | 1,3862419 | 0,251023067 |
| 355 | ENSG00000047617 | 0,032041788  | 3,970592443 | 0,0359035 | 0,851369055 |
| 356 | ENSG00000047621 | -0,268116383 | 4,724934691 | 1,6406784 | 0,212936501 |
| 357 | ENSG00000047634 | -0,391262183 | 4,279287884 | 7,9187324 | 0,010661614 |
| 358 | ENSG00000047644 | 0,267075764  | 5,060342759 | 2,9337678 | 0,10012996  |
| 359 | ENSG00000047849 | 0,483090447  | 9,450377693 | 4,073441  | 0,055313675 |
| 360 | ENSG00000047932 | 0,206713366  | 5,593329951 | 2,2378065 | 0,148164077 |
| 361 | ENSG00000048028 | -0,042961041 | 6,921003487 | 0,0294415 | 0,865257139 |
| 362 | ENSG00000048052 | 0,176152786  | 5,614878871 | 0,7384382 | 0,398986897 |
| 363 | ENSG00000048342 | 0,151335836  | 4,806032358 | 0,9705251 | 0,334750487 |
| 364 | ENSG00000048392 | -0,07532851  | 5,686971484 | 0,1324276 | 0,719235897 |
| 365 | ENSG00000048405 | -0,03035045  | 5,221454372 | 0,0389146 | 0,84534254  |
| 366 | ENSG00000048471 | 0,192440303  | 4,660908975 | 0,7332168 | 0,400633222 |
| 367 | ENSG00000048540 | 0,602720967  | 4,263515412 | 2,1312726 | 0,157780601 |
| 368 | ENSG00000048544 | -0,374779021 | 5,531241369 | 3,1901481 | 0,087210695 |
| 369 | ENSG00000048649 | 0,090279027  | 6,432670973 | 0,64785   | 0,429056502 |
| 370 | ENSG00000048707 | -0,099259394 | 7,655315362 | 0,3898321 | 0,538486321 |
| 371 | ENSG00000048740 | 0,027656352  | 6,888383846 | 0,0458514 | 0,832317403 |
| 372 | ENSG00000048828 | 0,094664943  | 6,670343271 | 0,7890037 | 0,383520967 |
| 373 | ENSG00000048991 | -0,081221671 | 4,497180851 | 0,3433161 | 0,563580272 |
| 374 | ENSG00000049130 | -0,419002324 | 5,06859551  | 1,6455396 | 0,212282589 |
| 375 | ENSG00000049167 | 0,098570061  | 3,855983544 | 0,3994662 | 0,541752461 |
| 376 | ENSG00000049239 | 0,454770271  | 6,335413019 | 3,2362682 | 0,085096847 |
| 377 | ENSG00000049245 | 0,016752928  | 6,346036275 | 0,0151129 | 0,903218016 |
| 378 | ENSG00000049246 | 0,841977606  | 5,291812166 | 12,594722 | 0,001701764 |
| 379 | ENSG00000049323 | 0,412149701  | 7,971290337 | 10,484066 | 0,003607276 |
| 380 | ENSG00000049449 | -0,124137317 | 4,722517351 | 0,4016932 | 0,532438805 |
| 381 | ENSG00000049540 | -0,408007318 | 6,764035142 | 1,1638351 | 0,291801911 |
| 382 | ENSG00000049618 | -0,068906484 | 6,75831161  | 0,1616673 | 0,691320255 |
| 383 | ENSG00000049656 | 0,081581126  | 4,93696955  | 0,2469969 | 0,623892143 |
| 384 | ENSG00000049759 | 0,029679696  | 6,216773421 | 0,0195789 | 0,889931663 |
| 385 | ENSG00000049860 | 0,247723094  | 6,045415393 | 3,0038781 | 0,096353347 |
| 386 | ENSG00000049883 | -0,156504577 | 4,385358923 | 1,0316131 | 0,320295087 |
| 387 | ENSG00000050130 | -0,155433545 | 5,112200126 | 0,6189583 | 0,439427511 |
| 388 | ENSG00000050165 | 0,536933635  | 10,68228189 | 3,7920002 | 0,063747654 |
| 389 | ENSG00000050344 | -0,310954842 | 4,741742779 | 2,5244578 | 0,12568025  |
| 390 | ENSG00000050393 | -0,293530466 | 4,532270007 | 8,9913401 | 0,039137402 |
| 391 | ENSG00000050405 | 0,360710498  | 5,879349897 | 2,7164168 | 0,112849468 |
| 392 | ENSG00000050426 | 0,286515009  | 4,927903683 | 5,1297116 | 0,033166739 |
| 393 | ENSG00000050748 | -0,218984926 | 5,479642912 | 6,7518579 | 0,024510245 |
| 394 | ENSG00000051009 | 0,231032167  | 4,03014615  | 2,0350983 | 0,20370809  |
| 395 | ENSG00000051108 | 0,321680575  | 6,33682504  | 3,885111  | 0,06080533  |
| 396 | ENSG00000051382 | 0,101666643  | 5,391243095 | 1,0047244 | 0,326513402 |
| 397 | ENSG00000051620 | -0,377253769 | 6,036172121 | 4,013712  | 0,056991936 |
| 398 | ENSG00000051825 | -0,307109993 | 5,183109548 | 3,1611291 | 0,088571787 |
| 399 | ENSG00000052126 | -0,031805844 | 7,007401489 | 0,0376152 | 0,847912315 |
| 400 | ENSG00000052723 | 0,041323129  | 5,239098587 | 0,0842874 | 0,774153265 |
| 401 | ENSG00000052749 | 0,183158392  | 4,167684866 | 0,5513808 | 0,465234419 |
| 402 | ENSG00000052795 | 0,135621323  | 6,396573905 | 1,0976724 | 0,305573115 |
| 403 | ENSG00000052802 | 0,072664599  | 4,183752493 | 0,1023666 | 0,75188223  |
| 404 | ENSG00000052841 | -0,02302017  | 6,28924335  | 0,0344055 | 0,85445954  |
| 405 | ENSG00000053254 | -0,181649659 | 6,475526731 | 1,1610568 | 0,292364728 |
| 406 | ENSG00000053371 | 0,226553877  | 4,340780564 | 3,1370562 | 0,157577113 |
| 407 | ENSG00000053372 | -0,295232566 | 3,98022818  | 3,5263683 | 0,088591033 |
| 408 | ENSG00000053747 | 0,112624562  | 4,53044545  | 0,1357966 | 0,715849828 |
| 409 | ENSG00000053770 | -0,39123188  | 6,225113075 | 2,9107111 | 0,101396948 |
| 410 | ENSG00000053900 | 0,046352262  | 5,098200403 | 0,1529827 | 0,699271069 |
| 411 | ENSG00000054116 | -0,168814428 | 5,16076971  | 3,0130615 | 0,110820865 |



|     |                 |              |             |           |             |
|-----|-----------------|--------------|-------------|-----------|-------------|
| 412 | ENSG00000054118 | 0,089916227  | 6,8278031   | 0,6503213 | 0,428189556 |
| 413 | ENSG00000054148 | -0,026542479 | 5,158044174 | 0,0245769 | 0,876787224 |
| 414 | ENSG00000054267 | 0,189438551  | 5,734284136 | 2,9342232 | 0,100058463 |
| 415 | ENSG00000054282 | 0,110141482  | 5,081954482 | 0,6979495 | 0,411997172 |
| 416 | ENSG00000054523 | -0,004785037 | 7,589450371 | 0,0006344 | 0,980122104 |
| 417 | ENSG00000054611 | 0,161947751  | 3,950137346 | 0,7745097 | 0,404057769 |
| 418 | ENSG00000054654 | -0,293286681 | 8,855933584 | 3,625418  | 0,069381822 |
| 419 | ENSG00000054793 | 0,673589008  | 6,043670655 | 5,4800882 | 0,028222566 |
| 420 | ENSG00000054965 | 0,077689492  | 5,81707915  | 0,2106667 | 0,650532673 |
| 421 | ENSG00000054983 | -0,049650376 | 5,066124761 | 0,1898429 | 0,737426863 |
| 422 | ENSG00000055044 | -0,158416533 | 4,903156408 | 1,2432161 | 0,276290605 |
| 423 | ENSG00000055070 | -0,027104534 | 5,304735889 | 0,0261079 | 0,873041199 |
| 424 | ENSG00000055118 | -0,174701865 | 5,136242328 | 0,632163  | 0,434652375 |
| 425 | ENSG00000055130 | -0,109313449 | 6,165349582 | 1,5028596 | 0,23253384  |
| 426 | ENSG00000055147 | -0,031519021 | 5,329143778 | 0,0359261 | 0,851322853 |
| 427 | ENSG00000055163 | 0,124178408  | 4,543853882 | 0,6500482 | 0,428313657 |
| 428 | ENSG00000055208 | 0,011172801  | 6,264230801 | 0,0103408 | 0,919876953 |
| 429 | ENSG00000055211 | -0,033588887 | 5,601582031 | 0,1007496 | 0,884290281 |
| 430 | ENSG00000055332 | 0,251253683  | 6,242601805 | 2,3448613 | 0,139270439 |
| 431 | ENSG00000055483 | 0,014959881  | 4,654873413 | 0,0050172 | 0,944140806 |
| 432 | ENSG00000055609 | 0,056937989  | 7,559127651 | 0,1335864 | 0,718056434 |
| 433 | ENSG00000055917 | 0,004241403  | 6,971798188 | 0,0015962 | 0,968472868 |
| 434 | ENSG00000055950 | -0,039655349 | 4,115758972 | 0,1170437 | 0,803330411 |
| 435 | ENSG00000056050 | -0,292363788 | 4,126494419 | 3,864242  | 0,09061077  |
| 436 | ENSG00000056097 | -0,052558403 | 6,787269891 | 0,1696925 | 0,684167446 |
| 437 | ENSG00000056586 | -0,026968249 | 6,743439841 | 0,0470251 | 0,830219301 |
| 438 | ENSG00000056972 | 0,015349411  | 3,959889643 | 0,0066772 | 0,93557739  |
| 439 | ENSG00000057019 | -0,348430654 | 7,232611753 | 3,2506445 | 0,084450049 |
| 440 | ENSG00000057252 | -0,098830066 | 5,049853812 | 0,2649211 | 0,611646512 |
| 441 | ENSG00000057294 | 0,111435879  | 7,564989259 | 0,1814515 | 0,674069444 |
| 442 | ENSG00000057608 | -0,107418061 | 7,105401855 | 0,3747494 | 0,546402519 |
| 443 | ENSG00000057663 | -0,144640071 | 5,070599078 | 0,8978397 | 0,353164039 |
| 444 | ENSG00000057757 | 0,100634139  | 4,81181021  | 0,8584638 | 0,421967286 |
| 445 | ENSG00000057935 | 0,009964318  | 4,589818945 | 0,0110081 | 0,94028736  |
| 446 | ENSG00000058056 | -0,017606635 | 7,170489824 | 0,0059886 | 0,938982424 |
| 447 | ENSG00000058063 | -0,177267765 | 6,609044756 | 1,1481387 | 0,295000827 |
| 448 | ENSG00000058091 | 0,186128961  | 5,883728948 | 1,334141  | 0,259872095 |
| 449 | ENSG00000058262 | 0,101052237  | 6,647760489 | 0,4061587 | 0,530188595 |
| 450 | ENSG00000058272 | -0,092010146 | 6,909272897 | 0,4552552 | 0,506520433 |
| 451 | ENSG00000058404 | 0,33704136   | 6,07963472  | 2,2309517 | 0,14879761  |
| 452 | ENSG00000058600 | -0,060315798 | 4,525785867 | 0,2205041 | 0,643040734 |
| 453 | ENSG00000058668 | 0,294750257  | 8,010016755 | 2,6291753 | 0,118474861 |
| 454 | ENSG00000058729 | -0,122150363 | 4,816480714 | 0,3248719 | 0,574193542 |
| 455 | ENSG00000058799 | -0,189980839 | 4,067819446 | 3,4529631 | 0,262393105 |
| 456 | ENSG00000058804 | -0,089989607 | 4,395951118 | 0,2423534 | 0,627155235 |
| 457 | ENSG00000058866 | 0,420478632  | 4,916770516 | 3,4121073 | 0,077561158 |
| 458 | ENSG00000059378 | 0,382208975  | 4,098427441 | 7,806707  | 0,020501893 |
| 459 | ENSG00000059573 | 0,469851688  | 4,712711736 | 8,2862692 | 0,00845735  |
| 460 | ENSG00000059588 | 0,154156787  | 5,047753541 | 1,1373853 | 0,297210469 |
| 461 | ENSG00000059691 | -0,723788861 | 5,658860077 | 10,331861 | 0,003828789 |
| 462 | ENSG00000059728 | -0,017088694 | 4,40543538  | 0,0026119 | 0,959679287 |
| 463 | ENSG00000059758 | -0,112663995 | 5,609263162 | 0,3580185 | 0,555427629 |
| 464 | ENSG00000059804 | 0,178302297  | 5,669080044 | 0,2154428 | 0,646876645 |
| 465 | ENSG00000060138 | -0,08043505  | 7,679113339 | 0,1996197 | 0,659186469 |
| 466 | ENSG00000060237 | -0,248390938 | 8,444570288 | 1,5472331 | 0,226012599 |
| 467 | ENSG00000060339 | -0,062819124 | 5,679210501 | 0,4193115 | 0,523639137 |
| 468 | ENSG00000060688 | 0,039925533  | 4,466688705 | 0,1514365 | 0,82488787  |
| 469 | ENSG00000060749 | 0,171952383  | 6,068840153 | 2,0869238 | 0,161939769 |
| 470 | ENSG00000060762 | -0,319074566 | 7,296394734 | 1,4687136 | 0,237792969 |

|     |                 |              |             |           |             |
|-----|-----------------|--------------|-------------|-----------|-------------|
| 471 | ENSG00000060971 | -0,176231702 | 5,047678062 | 1,392038  | 0,250062848 |
| 472 | ENSG00000060982 | 0,055571359  | 5,270429353 | 0,0241227 | 0,877921439 |
| 473 | ENSG00000061273 | 0,007678494  | 5,089810014 | 0,0014124 | 0,97034362  |
| 474 | ENSG00000061676 | -0,100292247 | 8,051782928 | 0,4933971 | 0,489405991 |
| 475 | ENSG00000061794 | -0,246587772 | 5,728807284 | 1,5319873 | 0,228241038 |
| 476 | ENSG00000061918 | -0,064679655 | 4,530748158 | 0,176497  | 0,67828101  |
| 477 | ENSG00000061936 | -0,168518419 | 4,959258327 | 0,8000698 | 0,380292872 |
| 478 | ENSG00000061987 | 0,094602461  | 6,593049844 | 0,3776923 | 0,544843971 |
| 479 | ENSG00000062194 | -0,077877945 | 6,670272721 | 0,3014413 | 0,588230913 |
| 480 | ENSG00000062282 | 0,225995213  | 5,132838812 | 0,120494  | 0,731640148 |
| 481 | ENSG00000062370 | -0,178247603 | 3,640416349 | 1,1507948 | 0,379391277 |
| 482 | ENSG00000062485 | -0,246214128 | 8,026909605 | 1,6960292 | 0,205636815 |
| 483 | ENSG00000062598 | 0,057104965  | 4,794678759 | 0,1397436 | 0,71194324  |
| 484 | ENSG00000062650 | -0,012650695 | 6,008201877 | 0,0141299 | 0,906402471 |
| 485 | ENSG00000062716 | -0,208874897 | 7,299052874 | 0,2586176 | 0,615891509 |
| 486 | ENSG00000062725 | 0,106957525  | 5,578832215 | 0,6643013 | 0,423336144 |
| 487 | ENSG00000063046 | 0,218101432  | 8,667517647 | 1,3073086 | 0,264557511 |
| 488 | ENSG00000063177 | 0,284532619  | 7,129410116 | 1,8067829 | 0,191940698 |
| 489 | ENSG00000063244 | 0,13247742   | 5,218505823 | 0,6555794 | 0,426382578 |
| 490 | ENSG00000063245 | -0,22932841  | 5,538433148 | 1,313791  | 0,263438159 |
| 491 | ENSG00000063322 | 0,233881638  | 4,363717733 | 2,6975733 | 0,14922178  |
| 492 | ENSG00000063587 | 0,278135674  | 3,968904717 | 2,520269  | 0,125978827 |
| 493 | ENSG00000063601 | 0,164860805  | 4,502022653 | 1,7054255 | 0,240896162 |
| 494 | ENSG00000063660 | -0,128726325 | 5,805510507 | 0,4172283 | 0,524685252 |
| 495 | ENSG00000063854 | -0,048532406 | 5,501399149 | 0,0768693 | 0,784050445 |
| 496 | ENSG00000063978 | 0,063300042  | 5,049798828 | 0,248999  | 0,699816609 |
| 497 | ENSG00000064042 | 0,279981631  | 7,546323895 | 3,0753683 | 0,092708092 |
| 498 | ENSG00000064102 | -0,263435141 | 4,450948636 | 3,3032435 | 0,085177721 |
| 499 | ENSG00000064115 | 0,35045708   | 5,081622851 | 6,2076567 | 0,0203114   |
| 500 | ENSG00000064205 | 0,222255163  | 4,985985285 | 0,3589747 | 0,554904115 |
| 501 | ENSG00000064225 | 0,063297282  | 5,776329316 | 0,0717902 | 0,791124496 |
| 502 | ENSG00000064309 | 1,150899814  | 5,112646761 | 4,6505949 | 0,041682252 |
| 503 | ENSG00000064313 | -0,025159429 | 5,149033917 | 0,0329655 | 0,857503887 |
| 504 | ENSG00000064393 | 0,125951008  | 7,632565462 | 0,1412306 | 0,710487904 |
| 505 | ENSG00000064419 | 0,082495688  | 5,521152677 | 0,798062  | 0,381969167 |
| 506 | ENSG00000064601 | -0,393057006 | 5,745532695 | 7,8629846 | 0,010030045 |
| 507 | ENSG00000064607 | -0,132428846 | 6,219438303 | 0,6251613 | 0,437174079 |
| 508 | ENSG00000064651 | -0,250001117 | 5,593038318 | 1,4327039 | 0,243456931 |
| 509 | ENSG00000064652 | -0,092764354 | 3,697759505 | 0,4073245 | 0,6590235   |
| 510 | ENSG00000064666 | 0,204695376  | 4,668405149 | 0,8691878 | 0,360817638 |
| 511 | ENSG00000064703 | -0,099534255 | 4,132161684 | 0,945172  | 0,542143545 |
| 512 | ENSG00000064726 | -0,23260898  | 7,420001065 | 0,83021   | 0,371617347 |
| 513 | ENSG00000064763 | -0,434906088 | 4,150948468 | 8,8643624 | 0,006715674 |
| 514 | ENSG00000064933 | -0,000206117 | 4,628699268 | 4,765E-07 | 0,999455128 |
| 515 | ENSG00000064989 | -0,409981383 | 6,552809028 | 1,2835291 | 0,268860002 |
| 516 | ENSG00000064995 | -0,269112605 | 4,218759634 | 8,8920266 | 0,088210765 |
| 517 | ENSG00000064999 | -0,204853581 | 5,35993302  | 0,9302686 | 0,34477696  |
| 518 | ENSG00000065000 | -0,134978162 | 5,930523614 | 0,6709936 | 0,421071928 |
| 519 | ENSG00000065029 | 0,122106906  | 4,562965267 | 0,4374438 | 0,514898735 |
| 520 | ENSG00000065060 | -0,172230443 | 5,593452175 | 1,4270654 | 0,244342377 |
| 521 | ENSG00000065135 | -0,032292973 | 6,188789161 | 0,0680767 | 0,796460606 |
| 522 | ENSG00000065150 | 0,211790417  | 7,484105088 | 1,8123383 | 0,191250425 |
| 523 | ENSG00000065154 | 0,423585433  | 6,038908475 | 3,0273001 | 0,095175365 |
| 524 | ENSG00000065183 | -0,148100069 | 4,978700481 | 1,2669205 | 0,271857858 |
| 525 | ENSG00000065243 | -0,002503042 | 6,298068091 | 0,0002619 | 0,987226432 |
| 526 | ENSG00000065308 | 0,051565211  | 4,974562374 | 0,0952054 | 0,760424944 |
| 527 | ENSG00000065320 | 0,001533069  | 6,087206813 | 2,936E-05 | 0,995723504 |
| 528 | ENSG00000065413 | -0,009571907 | 5,033710071 | 0,0029966 | 0,95681527  |
| 529 | ENSG00000065427 | -0,328080617 | 6,594470301 | 4,764004  | 0,03945929  |

|     |                 |              |             |           |             |
|-----|-----------------|--------------|-------------|-----------|-------------|
| 530 | ENSG00000065457 | 0,031794432  | 3,635537336 | 0,0477342 | 0,885892909 |
| 531 | ENSG00000065518 | -0,555971863 | 6,614857814 | 9,6634279 | 0,004926994 |
| 532 | ENSG00000065526 | 0,176178534  | 6,353437379 | 0,7532303 | 0,394377569 |
| 533 | ENSG00000065534 | 0,005356018  | 5,856763893 | 0,0003141 | 0,986012644 |
| 534 | ENSG00000065548 | -0,16329845  | 5,912293885 | 0,5934708 | 0,448883383 |
| 535 | ENSG00000065559 | -0,014527237 | 5,592886748 | 0,0082948 | 0,928217013 |
| 536 | ENSG00000065613 | 0,300634353  | 7,414270002 | 2,5277226 | 0,125448111 |
| 537 | ENSG00000065615 | -0,148029318 | 4,600162005 | 1,3144551 | 0,319511212 |
| 538 | ENSG00000065665 | 0,007795746  | 3,72965153  | 0,0022212 | 0,998833411 |
| 539 | ENSG00000065802 | 0,290582666  | 5,336988687 | 3,2858435 | 0,082890195 |
| 540 | ENSG00000065809 | 1,818484107  | 5,301869085 | 8,5323918 | 0,007662176 |
| 541 | ENSG00000065833 | -0,839538169 | 5,528593732 | 26,545536 | 3,1547E-05  |
| 542 | ENSG00000065882 | -0,571605455 | 6,895678788 | 15,767895 | 0,000597336 |
| 543 | ENSG00000065883 | 0,025208776  | 6,149399618 | 0,0379046 | 0,847330153 |
| 544 | ENSG00000065911 | -0,584555438 | 4,434094525 | 10,96122  | 0,003036275 |
| 545 | ENSG00000065923 | -0,108939748 | 4,009879657 | 0,2996321 | 0,589360359 |
| 546 | ENSG00000065970 | 0,239811171  | 4,817363074 | 1,5382318 | 0,227324937 |
| 547 | ENSG00000065978 | -0,127843871 | 8,719642825 | 1,0282133 | 0,32104042  |
| 548 | ENSG00000066027 | -0,151339727 | 6,48855793  | 1,6359394 | 0,213532563 |
| 549 | ENSG00000066044 | 0,014362484  | 5,045582076 | 0,0129388 | 0,940424864 |
| 550 | ENSG00000066056 | 0,15499966   | 4,594957306 | 0,5178057 | 0,478992881 |
| 551 | ENSG00000066084 | 0,127319706  | 5,576370363 | 1,1901837 | 0,286496572 |
| 552 | ENSG00000066117 | 0,087287311  | 4,393494721 | 0,2897805 | 0,656397128 |
| 553 | ENSG00000066135 | 0,213413575  | 3,740152121 | 1,7988634 | 0,27544196  |
| 554 | ENSG00000066136 | -0,056282736 | 5,365047287 | 0,1142463 | 0,73841147  |
| 555 | ENSG00000066294 | 0,010087833  | 3,954297741 | 0,0011029 | 0,973792644 |
| 556 | ENSG00000066322 | 0,073123177  | 4,547318204 | 0,2095163 | 0,651420766 |
| 557 | ENSG00000066422 | -0,007176173 | 4,993809279 | 0,0023144 | 0,962043014 |
| 558 | ENSG00000066427 | 0,116944317  | 5,280974455 | 0,9182299 | 0,347823021 |
| 559 | ENSG00000066455 | -0,027240811 | 5,315108917 | 0,0434839 | 0,836637268 |
| 560 | ENSG00000066557 | -0,442654751 | 4,697746583 | 2,9286831 | 0,100407779 |
| 561 | ENSG00000066583 | -0,892583685 | 6,217198002 | 19,7038   | 0,000186656 |
| 562 | ENSG00000066629 | -0,024204053 | 5,054332815 | 0,0506028 | 0,823987728 |
| 563 | ENSG00000066651 | -0,131859836 | 4,788279527 | 0,7339786 | 0,400392372 |
| 564 | ENSG00000066654 | 0,005296915  | 5,737886028 | 0,0016811 | 0,967645853 |
| 565 | ENSG00000066697 | 0,002232688  | 3,87684432  | 0,0001857 | 0,989244129 |
| 566 | ENSG00000066739 | 0,083157786  | 6,197277906 | 0,5031048 | 0,485208714 |
| 567 | ENSG00000066777 | 0,005048043  | 6,519770959 | 0,001738  | 0,967102742 |
| 568 | ENSG00000066855 | -0,267969086 | 4,607606994 | 2,4963572 | 0,127699397 |
| 569 | ENSG00000066926 | 0,171440184  | 5,07297883  | 1,1659825 | 0,291367877 |
| 570 | ENSG00000066933 | -0,009812789 | 6,890032931 | 0,0076624 | 0,930997552 |
| 571 | ENSG00000067048 | 0,121130074  | 5,944242743 | 0,0575644 | 0,812502854 |
| 572 | ENSG00000067057 | 0,132749275  | 6,080581297 | 0,5453022 | 0,467676304 |
| 573 | ENSG00000067064 | -0,16981845  | 5,163611975 | 0,4574581 | 0,505526972 |
| 574 | ENSG00000067066 | 0,053486752  | 6,323727632 | 0,1694803 | 0,684353731 |
| 575 | ENSG00000067082 | 0,5041493    | 6,394837063 | 2,2092732 | 0,150697914 |
| 576 | ENSG00000067113 | 0,124672221  | 5,142978847 | 0,5334527 | 0,472497875 |
| 577 | ENSG00000067141 | 0,687264823  | 5,183419496 | 3,8920621 | 0,060591948 |
| 578 | ENSG00000067167 | 0,098252348  | 6,933231625 | 0,1873004 | 0,669184664 |
| 579 | ENSG00000067177 | -0,02820888  | 4,333874129 | 0,0259162 | 0,873504093 |
| 580 | ENSG00000067182 | -0,163703023 | 5,542288403 | 0,4130315 | 0,526759349 |
| 581 | ENSG00000067208 | 0,279172842  | 6,158453385 | 2,9202048 | 0,100873014 |
| 582 | ENSG00000067225 | -0,243895882 | 9,204918904 | 1,9978385 | 0,170805019 |
| 583 | ENSG00000067248 | -0,038118766 | 5,721864145 | 0,0516938 | 0,822140921 |
| 584 | ENSG00000067334 | -0,242917965 | 5,786004067 | 1,9684616 | 0,173902686 |
| 585 | ENSG00000067365 | -0,29207527  | 3,733933704 | 2,6367932 | 0,117975405 |
| 586 | ENSG00000067369 | 0,030947954  | 6,130548248 | 0,0612908 | 0,806645739 |
| 587 | ENSG00000067533 | -0,476149189 | 5,464034524 | 9,8743939 | 0,004546981 |
| 588 | ENSG00000067560 | 0,111688937  | 7,740998406 | 0,8835262 | 0,356924611 |

|     |                 |              |             |           |             |
|-----|-----------------|--------------|-------------|-----------|-------------|
| 589 | ENSG00000067596 | 0,078270066  | 5,242133258 | 0,4180458 | 0,524260892 |
| 590 | ENSG00000067646 | -0,045467333 | 4,492446358 | 0,0112235 | 0,916543416 |
| 591 | ENSG00000067704 | -0,019175852 | 6,60290654  | 0,0339524 | 0,855409645 |
| 592 | ENSG00000067798 | -0,160091054 | 4,524689366 | 0,3097311 | 0,583194168 |
| 593 | ENSG00000067829 | -0,105718061 | 4,771045324 | 0,4614052 | 0,503714259 |
| 594 | ENSG00000067900 | 0,096683126  | 6,865549619 | 0,7871806 | 0,38406197  |
| 595 | ENSG00000067955 | 0,218580273  | 5,035122581 | 1,9957196 | 0,17106903  |
| 596 | ENSG00000067992 | 0,258093936  | 6,230175789 | 3,4371539 | 0,07650648  |
| 597 | ENSG00000068001 | -0,14391277  | 4,483165523 | 0,3723973 | 0,547654334 |
| 598 | ENSG00000068024 | -0,060856324 | 4,233521835 | 0,0995101 | 0,755248967 |
| 599 | ENSG00000068097 | 0,063680536  | 4,228780222 | 0,2428609 | 0,739692463 |
| 600 | ENSG00000068305 | 0,109327266  | 7,341675057 | 0,3791326 | 0,544084273 |
| 601 | ENSG00000068308 | 0,265404981  | 4,490590264 | 3,66988   | 0,08324355  |
| 602 | ENSG00000068323 | -0,005632894 | 4,562434276 | 0,0006903 | 0,979264764 |
| 603 | ENSG00000068366 | 0,114028574  | 6,702893884 | 0,298874  | 0,589828703 |
| 604 | ENSG00000068383 | -0,089545965 | 5,893891253 | 0,2688306 | 0,609045875 |
| 605 | ENSG00000068400 | 0,094818751  | 4,59541738  | 0,3653968 | 0,551412571 |
| 606 | ENSG00000068615 | 0,599637178  | 5,194520927 | 4,6836921 | 0,041023935 |
| 607 | ENSG00000068650 | 0,263315186  | 5,78576908  | 1,1561162 | 0,293369174 |
| 608 | ENSG00000068654 | -0,089623344 | 5,138662608 | 0,1646435 | 0,688648772 |
| 609 | ENSG00000068697 | -0,082817642 | 7,097930414 | 0,3503684 | 0,55963086  |
| 610 | ENSG00000068724 | 0,104088506  | 3,734520796 | 0,2785417 | 0,622693654 |
| 611 | ENSG00000068745 | 0,224765107  | 4,887022048 | 1,9523805 | 0,175601212 |
| 612 | ENSG00000068784 | 0,061821551  | 4,747372634 | 0,1414579 | 0,710266197 |
| 613 | ENSG00000068796 | -0,000904766 | 4,457298772 | 3,298E-05 | 0,995467196 |
| 614 | ENSG00000068878 | -0,187983505 | 7,117300522 | 0,9828089 | 0,331772176 |
| 615 | ENSG00000068885 | 0,291695682  | 4,027011701 | 1,7966344 | 0,193147779 |
| 616 | ENSG00000068903 | -0,507480634 | 5,799205169 | 6,0769105 | 0,021546257 |
| 617 | ENSG00000068912 | 0,257131392  | 5,859135357 | 3,1923381 | 0,087081755 |
| 618 | ENSG00000068976 | -0,939305508 | 5,442641142 | 14,260573 | 0,000972433 |
| 619 | ENSG00000069020 | -0,017362881 | 6,732223631 | 0,0107699 | 0,918240724 |
| 620 | ENSG00000069122 | -0,406145863 | 6,78368019  | 8,7116917 | 0,007118226 |
| 621 | ENSG00000069248 | -0,057048209 | 5,960968172 | 0,2033506 | 0,656217473 |
| 622 | ENSG00000069275 | -0,017679121 | 8,626696561 | 0,0206331 | 0,887023657 |
| 623 | ENSG00000069329 | -0,00235834  | 6,871440601 | 0,0002352 | 0,987896334 |
| 624 | ENSG00000069345 | -0,099660438 | 6,469925547 | 0,6243126 | 0,437453492 |
| 625 | ENSG00000069431 | -0,233003715 | 6,946144065 | 2,1422907 | 0,156756231 |
| 626 | ENSG00000069493 | 0,082903198  | 4,842016373 | 0,2133993 | 0,648434804 |
| 627 | ENSG00000069509 | -0,328986994 | 4,079822901 | 2,6242458 | 0,118807872 |
| 628 | ENSG00000069535 | 0,124045703  | 6,094083526 | 0,4615434 | 0,503650977 |
| 629 | ENSG00000069667 | 0,177329183  | 6,267718529 | 0,8683423 | 0,361047091 |
| 630 | ENSG00000069702 | -1,128086495 | 6,863262445 | 19,465995 | 0,000199625 |
| 631 | ENSG00000069849 | -0,654702381 | 5,817529889 | 6,9787867 | 0,014543448 |
| 632 | ENSG00000069869 | 0,230053682  | 5,090558179 | 1,3574856 | 0,255858065 |
| 633 | ENSG00000069956 | 0,12931052   | 5,468766407 | 0,2131081 | 0,648657536 |
| 634 | ENSG00000069966 | -0,542697456 | 4,933309427 | 11,529503 | 0,002473355 |
| 635 | ENSG00000069974 | -0,519389287 | 4,039256298 | 4,4038635 | 0,046982335 |
| 636 | ENSG00000069998 | -0,151457599 | 4,554170235 | 0,9045144 | 0,351414343 |
| 637 | ENSG00000070010 | -0,198325358 | 4,604637595 | 5,0469739 | 0,139505582 |
| 638 | ENSG00000070018 | 0,064673883  | 5,97307278  | 0,4042356 | 0,531133859 |
| 639 | ENSG00000070047 | 0,135112608  | 4,17314412  | 0,6021136 | 0,46940151  |
| 640 | ENSG00000070061 | 0,081090823  | 5,959698005 | 0,5369268 | 0,47105021  |
| 641 | ENSG00000070081 | -0,211903748 | 6,447931298 | 0,7978127 | 0,380954423 |
| 642 | ENSG00000070087 | 0,035029372  | 5,58840697  | 0,0583129 | 0,811309115 |
| 643 | ENSG00000070159 | 0,169942459  | 4,595197848 | 0,9050778 | 0,351267206 |
| 644 | ENSG00000070182 | 0,286149113  | 5,984571179 | 0,6652921 | 0,423024245 |
| 645 | ENSG00000070214 | 0,142374747  | 5,826595753 | 0,5886226 | 0,450718975 |
| 646 | ENSG00000070269 | 0,129690066  | 4,066038156 | 0,8952564 | 0,428273823 |
| 647 | ENSG00000070366 | 0,204748369  | 4,536675037 | 0,7261599 | 0,402874579 |

|     |                 |              |             |           |             |
|-----|-----------------|--------------|-------------|-----------|-------------|
| 648 | ENSG00000070367 | -0,123216493 | 6,385150081 | 0,475804  | 0,497197124 |
| 649 | ENSG00000070371 | -0,434099123 | 5,236860437 | 4,2275826 | 0,051235363 |
| 650 | ENSG00000070404 | 0,159729875  | 5,555813577 | 0,2379639 | 0,630275986 |
| 651 | ENSG00000070413 | 0,169723423  | 5,054346739 | 0,8065212 | 0,378411205 |
| 652 | ENSG00000070476 | 0,030444827  | 4,396449508 | 0,0264178 | 0,872296768 |
| 653 | ENSG00000070495 | -0,416816371 | 5,317307322 | 3,9045371 | 0,060211125 |
| 654 | ENSG00000070501 | -0,213665876 | 4,251378413 | 2,087601  | 0,193398638 |
| 655 | ENSG00000070540 | -0,032785168 | 4,990882613 | 0,0340379 | 0,855235406 |
| 656 | ENSG00000070610 | -0,135702213 | 6,285936897 | 0,501818  | 0,485786083 |
| 657 | ENSG00000070614 | 0,025952407  | 5,954684313 | 0,0093386 | 0,923848032 |
| 658 | ENSG00000070718 | 0,40173142   | 4,525748917 | 6,6137266 | 0,01701707  |
| 659 | ENSG00000070756 | 0,411331383  | 7,427682709 | 3,3488197 | 0,080181374 |
| 660 | ENSG00000070761 | -0,166043171 | 4,343175474 | 1,2793902 | 0,301426123 |
| 661 | ENSG00000070770 | 0,185671997  | 4,38468522  | 1,2419474 | 0,27655081  |
| 662 | ENSG00000070778 | 0,40360404   | 5,821676051 | 6,4070882 | 0,018621748 |
| 663 | ENSG00000070785 | -0,388441363 | 5,089180136 | 4,3076161 | 0,049252749 |
| 664 | ENSG00000070808 | -0,782658852 | 4,164785703 | 8,9075275 | 0,006603962 |
| 665 | ENSG00000070814 | -0,14321118  | 4,154376361 | 0,4857321 | 0,492788292 |
| 666 | ENSG00000070831 | -0,101178989 | 7,516088501 | 0,58157   | 0,453384088 |
| 667 | ENSG00000070882 | -0,14106679  | 4,073818961 | 0,273806  | 0,605770989 |
| 668 | ENSG00000070961 | 0,658287395  | 6,11291737  | 4,6687936 | 0,041318815 |
| 669 | ENSG00000071051 | -0,067336497 | 4,101168066 | 0,2196428 | 0,643691071 |
| 670 | ENSG00000071054 | 0,009908702  | 6,759323647 | 0,0065034 | 0,936416984 |
| 671 | ENSG00000071073 | 0,057244784  | 5,892903797 | 0,1345854 | 0,717061673 |
| 672 | ENSG00000071082 | 0,027709261  | 8,615205623 | 0,0100979 | 0,920823313 |
| 673 | ENSG00000071127 | -0,059623393 | 7,209778597 | 0,1562668 | 0,69623239  |
| 674 | ENSG00000071189 | -0,068114729 | 6,805514559 | 0,1279327 | 0,723830786 |
| 675 | ENSG00000071205 | -0,049110472 | 6,472182031 | 0,2383426 | 0,629989424 |
| 676 | ENSG00000071242 | 0,182468015  | 6,273908621 | 0,6560364 | 0,426223666 |
| 677 | ENSG00000071243 | -0,206641141 | 4,391463618 | 1,5987149 | 0,218687616 |
| 678 | ENSG00000071246 | 0,660054604  | 5,099763216 | 7,7050455 | 0,01072149  |
| 679 | ENSG00000071282 | 0,301357348  | 5,195291095 | 1,0214928 | 0,322629508 |
| 680 | ENSG00000071462 | -0,319195799 | 5,100733162 | 4,6091357 | 0,042508066 |
| 681 | ENSG00000071537 | 0,052365951  | 6,828138256 | 0,1927132 | 0,66473037  |
| 682 | ENSG00000071553 | -0,048590283 | 5,762730578 | 0,1117845 | 0,741130291 |
| 683 | ENSG00000071575 | 0,234109466  | 5,062454441 | 3,1173048 | 0,090627923 |
| 684 | ENSG00000071626 | -0,268473949 | 5,332428366 | 2,8212255 | 0,106494328 |
| 685 | ENSG00000071794 | 0,093536683  | 6,034426635 | 0,19526   | 0,662681252 |
| 686 | ENSG00000071859 | -0,074697585 | 4,874987454 | 0,1685019 | 0,685227148 |
| 687 | ENSG00000071967 | 0,558803387  | 8,335964015 | 3,2015532 | 0,086682377 |
| 688 | ENSG00000071991 | -0,207213824 | 6,800466428 | 0,7236822 | 0,403666008 |
| 689 | ENSG00000071994 | -0,216863024 | 5,004028807 | 3,2244202 | 0,085588396 |
| 690 | ENSG00000072042 | -0,152961699 | 4,745059337 | 1,4700516 | 0,305475736 |
| 691 | ENSG00000072062 | -0,153372356 | 6,571864384 | 0,3668377 | 0,550634985 |
| 692 | ENSG00000072110 | 0,069169984  | 6,981717118 | 0,0915141 | 0,764966782 |
| 693 | ENSG00000072121 | 0,166381012  | 5,186291485 | 0,8974984 | 0,353253847 |
| 694 | ENSG00000072134 | -0,005989936 | 4,577188376 | 0,0005868 | 0,980882668 |
| 695 | ENSG00000072135 | 0,089881685  | 4,282265858 | 0,2299674 | 0,636054557 |
| 696 | ENSG00000072163 | -0,325048486 | 6,120957267 | 1,6809396 | 0,207595477 |
| 697 | ENSG00000072195 | 0,069188642  | 6,170095162 | 0,1163816 | 0,736074392 |
| 698 | ENSG00000072201 | -0,166039806 | 3,841514855 | 0,9618457 | 0,353721029 |
| 699 | ENSG00000072210 | 0,420968259  | 6,317711772 | 4,1794982 | 0,052469866 |
| 700 | ENSG00000072274 | -0,079284229 | 7,208995977 | 0,0913285 | 0,765197737 |
| 701 | ENSG00000072310 | -0,501282716 | 4,739322099 | 2,4487725 | 0,131206696 |
| 702 | ENSG00000072364 | 0,17985801   | 7,297063381 | 1,800518  | 0,1926397   |
| 703 | ENSG00000072401 | -0,271693575 | 5,463859913 | 1,2607837 | 0,273031608 |
| 704 | ENSG00000072415 | 0,120991008  | 5,559776117 | 0,7599339 | 0,392289303 |
| 705 | ENSG00000072422 | 0,242687116  | 5,064252055 | 5,0993279 | 0,033642711 |
| 706 | ENSG00000072501 | -0,060255019 | 5,850331807 | 0,1189732 | 0,733269907 |

|     |                 |              |             |           |             |
|-----|-----------------|--------------|-------------|-----------|-------------|
| 707 | ENSG00000072506 | -0,216939938 | 5,013172002 | 1,4247166 | 0,244736568 |
| 708 | ENSG00000072518 | -0,167780694 | 4,473417435 | 0,5903251 | 0,450073015 |
| 709 | ENSG00000072609 | -0,081535538 | 4,009973456 | 0,1932019 | 0,664347323 |
| 710 | ENSG00000072682 | -0,343504294 | 5,420821029 | 3,4784621 | 0,07491891  |
| 711 | ENSG00000072694 | -0,554787305 | 4,520621585 | 5,9117967 | 0,023197638 |
| 712 | ENSG00000072736 | 0,163506194  | 4,755804817 | 1,2070527 | 0,283229903 |
| 713 | ENSG00000072756 | -0,135752465 | 4,501661798 | 1,1533818 | 0,367165228 |
| 714 | ENSG00000072778 | -0,188891181 | 8,663294865 | 0,82648   | 0,372675273 |
| 715 | ENSG00000072786 | 0,053545362  | 4,218293654 | 0,0677857 | 0,796893916 |
| 716 | ENSG00000072803 | 0,20977674   | 6,340018459 | 4,3875324 | 0,047319206 |
| 717 | ENSG00000072840 | 0,66199796   | 4,060986755 | 5,2744441 | 0,031034877 |
| 718 | ENSG00000072849 | 0,062816041  | 4,593136593 | 0,2201367 | 0,643316282 |
| 719 | ENSG00000072952 | -0,555507942 | 4,985457933 | 6,581296  | 0,017258436 |
| 720 | ENSG00000072958 | 0,094272797  | 4,507178949 | 0,33856   | 0,566294263 |
| 721 | ENSG00000073008 | -0,698988074 | 5,016685413 | 13,934332 | 0,001082603 |
| 722 | ENSG00000073060 | 0,118703718  | 3,873690923 | 0,1885947 | 0,668116023 |
| 723 | ENSG00000073331 | 0,040692872  | 4,621603171 | 0,043682  | 0,836277527 |
| 724 | ENSG00000073417 | -0,001444794 | 5,467096362 | 9,994E-05 | 0,992109469 |
| 725 | ENSG00000073464 | -0,308932086 | 5,300991878 | 2,303848  | 0,142614442 |
| 726 | ENSG00000073578 | -0,243323564 | 5,801537885 | 1,1105689 | 0,302850978 |
| 727 | ENSG00000073584 | -0,241327575 | 4,472141425 | 3,8639624 | 0,085332024 |
| 728 | ENSG00000073614 | 0,096569385  | 6,745215303 | 0,8245235 | 0,373199497 |
| 729 | ENSG00000073711 | -0,386955372 | 6,584682815 | 3,1380516 | 0,089671729 |
| 730 | ENSG00000073712 | -0,264029743 | 7,132353112 | 3,2669846 | 0,083686021 |
| 731 | ENSG00000073737 | -1,617078724 | 7,121767955 | 14,292616 | 0,000962292 |
| 732 | ENSG00000073792 | 0,013629528  | 3,789093211 | 0,0051718 | 0,980935785 |
| 733 | ENSG00000073803 | 0,05676466   | 4,183856373 | 0,1870302 | 0,684658029 |
| 734 | ENSG00000073849 | 0,385338542  | 6,051255248 | 3,714875  | 0,066308007 |
| 735 | ENSG00000073905 | -0,413433801 | 3,984873418 | 4,4575397 | 0,045767597 |
| 736 | ENSG00000073910 | 0,022282023  | 7,58836123  | 0,0176534 | 0,895449365 |
| 737 | ENSG00000073921 | -0,011800357 | 7,676549256 | 0,0054478 | 0,941795512 |
| 738 | ENSG00000073969 | -0,082261824 | 5,253445737 | 0,422956  | 0,52185621  |
| 739 | ENSG00000074054 | 0,046864263  | 6,914983046 | 0,1116484 | 0,741278337 |
| 740 | ENSG00000074181 | 0,11991669   | 5,245087412 | 0,2084263 | 0,652265045 |
| 741 | ENSG00000074201 | 0,130173581  | 5,702697973 | 1,3854761 | 0,251108905 |
| 742 | ENSG00000074219 | -0,419070557 | 4,622808728 | 5,0950598 | 0,033745691 |
| 743 | ENSG00000074266 | -0,059655831 | 4,171181617 | 0,2254005 | 0,762448266 |
| 744 | ENSG00000074319 | -0,104628944 | 5,396104843 | 1,3340527 | 0,314608642 |
| 745 | ENSG00000074356 | 0,164013561  | 5,447776064 | 1,2142901 | 0,281827221 |
| 746 | ENSG00000074416 | 0,455374587  | 6,414676079 | 3,8349859 | 0,062369616 |
| 747 | ENSG00000074527 | 0,081062747  | 6,423297161 | 0,2364071 | 0,631391454 |
| 748 | ENSG00000074582 | -0,130854199 | 4,058993754 | 0,8662216 | 0,39980557  |
| 749 | ENSG00000074590 | 0,305633373  | 5,58913219  | 2,6243277 | 0,118802411 |
| 750 | ENSG00000074603 | -0,052377916 | 6,112789747 | 0,2088016 | 0,651959259 |
| 751 | ENSG00000074657 | 0,141469335  | 6,369161831 | 1,1892649 | 0,286678086 |
| 752 | ENSG00000074695 | -0,072974483 | 7,443737917 | 0,1369339 | 0,714717618 |
| 753 | ENSG00000074696 | 0,275152347  | 4,993848201 | 2,7173478 | 0,112791093 |
| 754 | ENSG00000074755 | -0,029355684 | 6,16256084  | 0,021943  | 0,883523698 |
| 755 | ENSG00000074800 | 0,018498723  | 7,634163332 | 0,0063432 | 0,937205927 |
| 756 | ENSG00000074842 | -0,031028191 | 4,233876765 | 0,0146947 | 0,90456314  |
| 757 | ENSG00000074935 | -0,267026026 | 5,373769443 | 1,3228889 | 0,261836061 |
| 758 | ENSG00000074964 | 0,192155711  | 4,955803807 | 0,9538106 | 0,338863238 |
| 759 | ENSG00000075089 | -0,228712912 | 4,531879267 | 0,7586234 | 0,39271681  |
| 760 | ENSG00000075142 | 0,100501163  | 5,293817372 | 0,5559251 | 0,463396543 |
| 761 | ENSG00000075151 | 0,02373798   | 6,253788564 | 0,0412581 | 0,840811899 |
| 762 | ENSG00000075223 | 0,707303599  | 6,876524938 | 2,6797426 | 0,115177304 |
| 763 | ENSG00000075234 | -0,081477993 | 4,134086019 | 0,2915741 | 0,594378656 |
| 764 | ENSG00000075239 | -0,251763206 | 7,345690365 | 0,9378769 | 0,342850034 |
| 765 | ENSG00000075240 | -0,049222052 | 5,064718645 | 0,0538049 | 0,81861139  |

|     |                 |              |             |           |             |
|-----|-----------------|--------------|-------------|-----------|-------------|
| 766 | ENSG00000075275 | 0,381434472  | 3,725105347 | 2,6994139 | 0,113921772 |
| 767 | ENSG00000075292 | -0,073615319 | 7,763396319 | 0,2628389 | 0,61302469  |
| 768 | ENSG00000075303 | -0,179393645 | 4,428281123 | 0,9448171 | 0,34110547  |
| 769 | ENSG00000075336 | -0,625552833 | 5,696711031 | 9,3911777 | 0,005469888 |
| 770 | ENSG00000075391 | 0,205739552  | 6,444724226 | 1,9998197 | 0,170616811 |
| 771 | ENSG00000075407 | 0,096298759  | 5,318668364 | 0,687561  | 0,415447672 |
| 772 | ENSG00000075413 | -0,246458353 | 6,466993636 | 3,0257572 | 0,095219306 |
| 773 | ENSG00000075415 | -0,472307852 | 9,145848162 | 7,5148903 | 0,011579862 |
| 774 | ENSG00000075420 | 0,031777731  | 7,120858763 | 0,0689791 | 0,795147851 |
| 775 | ENSG00000075426 | -0,071270645 | 6,790690951 | 0,0555243 | 0,815790648 |
| 776 | ENSG00000075539 | -0,157057639 | 7,221795805 | 1,1834947 | 0,287825185 |
| 777 | ENSG00000075568 | -0,025968084 | 5,983241499 | 0,0431962 | 0,837170411 |
| 778 | ENSG00000075624 | -0,193061419 | 9,437500022 | 0,4389383 | 0,51418827  |
| 779 | ENSG00000075651 | -0,3364111   | 6,717734939 | 2,4425404 | 0,131674432 |
| 780 | ENSG00000075711 | 0,111989716  | 6,310843093 | 0,6497224 | 0,428399382 |
| 781 | ENSG00000075785 | 0,001086804  | 6,664370081 | 6,852E-05 | 0,993466127 |
| 782 | ENSG00000075790 | -0,355544477 | 6,482418541 | 2,4562042 | 0,130651487 |
| 783 | ENSG00000075826 | -0,144189501 | 4,011069239 | 0,4813478 | 0,494726885 |
| 784 | ENSG00000075856 | 0,261300108  | 4,930684351 | 3,8851996 | 0,060759825 |
| 785 | ENSG00000075884 | 0,102851482  | 3,777714894 | 0,1922504 | 0,66512125  |
| 786 | ENSG00000075914 | 0,032174864  | 4,262996436 | 0,0546896 | 0,839541684 |
| 787 | ENSG00000075945 | 0,077309603  | 6,491635814 | 0,1710284 | 0,683011547 |
| 788 | ENSG00000075975 | -0,043607577 | 5,346321688 | 0,1060162 | 0,747645251 |
| 789 | ENSG00000076003 | 0,113630549  | 4,142855349 | 0,5579187 | 0,462631399 |
| 790 | ENSG00000076043 | -0,25248741  | 5,680287023 | 2,4148561 | 0,133776251 |
| 791 | ENSG00000076053 | -0,075152816 | 4,568107319 | 0,15298   | 0,699286005 |
| 792 | ENSG00000076067 | 0,139225537  | 5,865308849 | 0,5175447 | 0,479102484 |
| 793 | ENSG00000076108 | 0,186418973  | 5,494368061 | 0,5158112 | 0,479831568 |
| 794 | ENSG00000076242 | -0,233030863 | 5,714565967 | 2,144907  | 0,156514166 |
| 795 | ENSG00000076248 | 0,339781989  | 3,989158814 | 6,5028699 | 0,056708516 |
| 796 | ENSG00000076321 | 0,155421975  | 4,617807902 | 1,4471532 | 0,241121638 |
| 797 | ENSG00000076356 | 0,146166985  | 4,876730297 | 0,2146205 | 0,647502539 |
| 798 | ENSG00000076513 | -0,116488958 | 4,941257874 | 1,1149106 | 0,301891807 |
| 799 | ENSG00000076554 | 0,075690803  | 3,976918171 | 0,2150756 | 0,647155962 |
| 800 | ENSG00000076555 | -0,334741113 | 7,526515996 | 0,7035541 | 0,410183552 |
| 801 | ENSG00000076641 | -0,436916392 | 5,250196499 | 6,0337764 | 0,021964665 |
| 802 | ENSG00000076685 | 0,11236906   | 5,122164227 | 0,5027333 | 0,485392798 |
| 803 | ENSG00000076706 | 0,065625219  | 7,093883502 | 0,1000128 | 0,754652636 |
| 804 | ENSG00000076716 | 0,28440946   | 4,035611205 | 0,9315173 | 0,344459668 |
| 805 | ENSG00000076770 | 0,261179698  | 6,354022722 | 0,7433085 | 0,397460394 |
| 806 | ENSG00000077009 | 0,03716744   | 7,685089902 | 0,0148667 | 0,90400902  |
| 807 | ENSG00000077044 | 0,125658263  | 5,781664069 | 0,2503883 | 0,621533131 |
| 808 | ENSG00000077063 | -0,467271641 | 3,686966057 | 4,3176493 | 0,049010378 |
| 809 | ENSG00000077092 | -0,328836696 | 5,147535807 | 3,4790592 | 0,074895608 |
| 810 | ENSG00000077097 | -0,011308102 | 7,534287899 | 0,0078843 | 0,930008089 |
| 811 | ENSG00000077147 | 0,014706853  | 7,3332652   | 0,0093176 | 0,923931209 |
| 812 | ENSG00000077157 | -0,104488494 | 10,36342108 | 0,0870346 | 0,770615253 |
| 813 | ENSG00000077232 | 0,007744848  | 6,637498322 | 0,0022682 | 0,962423554 |
| 814 | ENSG00000077235 | 0,131260733  | 6,1218075   | 0,5095899 | 0,482463586 |
| 815 | ENSG00000077238 | -0,324126084 | 4,832369474 | 1,0622247 | 0,313373412 |
| 816 | ENSG00000077254 | 0,03495738   | 6,205665048 | 0,0472259 | 0,829869647 |
| 817 | ENSG00000077380 | -0,160491231 | 6,497415295 | 1,2384855 | 0,277180628 |
| 818 | ENSG00000077458 | -0,014900182 | 4,120592252 | 0,0078313 | 0,997462664 |
| 819 | ENSG00000077514 | 0,003722308  | 3,869164631 | 0,0012802 | 0,983253516 |
| 820 | ENSG00000077522 | -0,016078293 | 10,22412069 | 0,0033303 | 0,954476353 |
| 821 | ENSG00000077549 | -0,067133565 | 6,431830027 | 0,209419  | 0,651485034 |
| 822 | ENSG00000077585 | -0,228594237 | 4,88200437  | 3,3946604 | 0,078228403 |
| 823 | ENSG00000077684 | -0,113131073 | 5,551353817 | 0,498664  | 0,487145561 |
| 824 | ENSG00000077721 | -0,106487254 | 5,53805403  | 0,7173268 | 0,405676774 |

|     |                 |              |             |           |             |
|-----|-----------------|--------------|-------------|-----------|-------------|
| 825 | ENSG00000077782 | 0,025157016  | 6,697317399 | 0,0146154 | 0,904819565 |
| 826 | ENSG00000077942 | -0,129924596 | 8,319922635 | 0,18335   | 0,672473816 |
| 827 | ENSG00000077943 | 0,729467662  | 4,83562651  | 2,1674658 | 0,154445522 |
| 828 | ENSG00000078018 | 0,306954379  | 4,065490652 | 1,6963423 | 0,205596424 |
| 829 | ENSG00000078043 | -0,096909585 | 5,865384316 | 0,5864607 | 0,451514517 |
| 830 | ENSG00000078053 | -0,672073707 | 4,238181952 | 7,1250421 | 0,013666479 |
| 831 | ENSG00000078061 | -0,163877007 | 4,952611346 | 0,9972248 | 0,328323675 |
| 832 | ENSG00000078070 | -0,179367406 | 5,377171079 | 1,4728685 | 0,237150308 |
| 833 | ENSG00000078114 | -0,324980366 | 11,36851076 | 0,593699  | 0,448797301 |
| 834 | ENSG00000078124 | -0,013525726 | 4,654261985 | 0,0044963 | 0,947114849 |
| 835 | ENSG00000078140 | -0,10855594  | 5,979231524 | 0,7671359 | 0,390085394 |
| 836 | ENSG00000078142 | 0,004007854  | 5,926432028 | 0,0009578 | 0,975574923 |
| 837 | ENSG00000078177 | 0,173515171  | 4,884959589 | 1,0808133 | 0,309269634 |
| 838 | ENSG00000078246 | 0,408451603  | 4,185311352 | 3,9077673 | 0,060112961 |
| 839 | ENSG00000078269 | 0,3989031    | 5,056377219 | 5,1622318 | 0,032700718 |
| 840 | ENSG00000078304 | -0,015025411 | 6,867737599 | 0,0216187 | 0,884376598 |
| 841 | ENSG00000078328 | -0,537782436 | 5,237738316 | 3,4413844 | 0,076382386 |
| 842 | ENSG00000078369 | 0,095308989  | 7,004527475 | 0,5369787 | 0,47102902  |
| 843 | ENSG00000078403 | -0,006084824 | 5,762347613 | 0,0015688 | 0,968745991 |
| 844 | ENSG00000078596 | -0,151417236 | 6,325908821 | 0,4652839 | 0,501944046 |
| 845 | ENSG00000078618 | -0,297257457 | 7,061467328 | 7,3016141 | 0,012662042 |
| 846 | ENSG00000078668 | -0,542150697 | 7,782731491 | 4,6096164 | 0,042513863 |
| 847 | ENSG00000078674 | -0,078934529 | 8,160544697 | 0,2752098 | 0,604836536 |
| 848 | ENSG00000078687 | -0,211104357 | 5,215976065 | 0,8351706 | 0,370217159 |
| 849 | ENSG00000078699 | 0,20295353   | 4,563900196 | 1,2554174 | 0,274028169 |
| 850 | ENSG00000078747 | -0,022654084 | 6,538993305 | 0,0381813 | 0,846781283 |
| 851 | ENSG00000078804 | 0,26172113   | 6,18001316  | 1,0198311 | 0,323015031 |
| 852 | ENSG00000078808 | 0,093431372  | 5,96617905  | 0,3667626 | 0,550675487 |
| 853 | ENSG00000078814 | 0,332025525  | 6,553435958 | 1,5667252 | 0,223203349 |
| 854 | ENSG00000078967 | -0,252784239 | 4,513749163 | 2,6662453 | 0,116048162 |
| 855 | ENSG00000079102 | -0,048228646 | 5,350854976 | 0,0849947 | 0,773240007 |
| 856 | ENSG00000079134 | -0,12110847  | 5,09605241  | 0,9484391 | 0,340165068 |
| 857 | ENSG00000079150 | 0,01473127   | 3,846399194 | 0,0066614 | 0,935653467 |
| 858 | ENSG00000079156 | -0,229375096 | 4,523750801 | 1,3182209 | 0,262656484 |
| 859 | ENSG00000079215 | -1,187023322 | 6,211877206 | 14,860255 | 0,000800522 |
| 860 | ENSG00000079246 | -0,100172675 | 7,663649167 | 0,3659123 | 0,551126557 |
| 861 | ENSG00000079277 | -0,187652042 | 4,886333296 | 1,7825949 | 0,194806484 |
| 862 | ENSG00000079308 | 0,125510733  | 8,893418346 | 0,1541739 | 0,698175947 |
| 863 | ENSG00000079332 | 0,038512383  | 7,008054715 | 0,0665575 | 0,798695511 |
| 864 | ENSG00000079335 | -0,184452933 | 3,472780066 | 1,3387004 | 0,350584    |
| 865 | ENSG00000079337 | -0,209150688 | 4,504944247 | 0,8911026 | 0,354942708 |
| 866 | ENSG00000079387 | 0,104877514  | 3,994860666 | 1,0136514 | 0,517715244 |
| 867 | ENSG00000079435 | 0,824491643  | 4,009009367 | 2,3594475 | 0,138103715 |
| 868 | ENSG00000079459 | -0,102436845 | 5,717185769 | 0,6895039 | 0,414798985 |
| 869 | ENSG00000079482 | -0,345980723 | 4,412240212 | 4,7791701 | 0,039189421 |
| 870 | ENSG00000079691 | 0,674656844  | 4,917724199 | 7,1622058 | 0,013453075 |
| 871 | ENSG00000079739 | -0,27401109  | 6,825660414 | 3,7250704 | 0,065919302 |
| 872 | ENSG00000079785 | -0,284712468 | 7,21242056  | 2,2017413 | 0,151364954 |
| 873 | ENSG00000079805 | -0,20366416  | 6,221313324 | 1,0286105 | 0,320985254 |
| 874 | ENSG00000079819 | 0,386006875  | 7,055126887 | 3,5830119 | 0,070962225 |
| 875 | ENSG00000079950 | -0,035560488 | 6,577974897 | 0,0571217 | 0,813208585 |
| 876 | ENSG00000079999 | -0,017747677 | 4,900420964 | 0,0121762 | 0,913087653 |
| 877 | ENSG00000080189 | 0,157665844  | 3,978830929 | 1,1150968 | 0,370737917 |
| 878 | ENSG00000080200 | 0,032018286  | 6,98283484  | 0,0500496 | 0,824936495 |
| 879 | ENSG00000080298 | -0,054194197 | 4,642051754 | 0,0662691 | 0,799126501 |
| 880 | ENSG00000080345 | -0,009834321 | 6,881952289 | 0,0041239 | 0,949349055 |
| 881 | ENSG00000080371 | 0,022898339  | 6,839001017 | 0,0239919 | 0,878247394 |
| 882 | ENSG00000080493 | 0,897788025  | 6,380766946 | 3,6913072 | 0,067113641 |
| 883 | ENSG00000080503 | 0,200839421  | 7,030717608 | 3,0859119 | 0,092169265 |



|     |                 |              |             |           |             |
|-----|-----------------|--------------|-------------|-----------|-------------|
| 884 | ENSG00000080546 | -0,361507145 | 5,901140996 | 4,9589968 | 0,035979038 |
| 885 | ENSG00000080573 | -0,325068671 | 4,736124966 | 1,5245733 | 0,229334761 |
| 886 | ENSG00000080608 | -0,156319776 | 4,863435963 | 0,9625761 | 0,336697647 |
| 887 | ENSG00000080709 | -1,272793502 | 4,414615135 | 27,686932 | 2,40568E-05 |
| 888 | ENSG00000080802 | -0,044458568 | 5,045746897 | 0,2586778 | 0,710588166 |
| 889 | ENSG00000080815 | 0,016477777  | 5,529733934 | 0,0222401 | 0,882739229 |
| 890 | ENSG00000080822 | -0,294832502 | 5,626650931 | 3,3671188 | 0,079413451 |
| 891 | ENSG00000080823 | -0,06681253  | 3,599411945 | 0,1343089 | 0,717339183 |
| 892 | ENSG00000080824 | -0,335897249 | 9,55196361  | 1,7237158 | 0,202102438 |
| 893 | ENSG00000080839 | 0,113006107  | 3,560047356 | 0,7118068 | 0,568441867 |
| 894 | ENSG00000080845 | 0,338963198  | 4,684710557 | 2,2118557 | 0,15047002  |
| 895 | ENSG00000080854 | -0,166438685 | 5,581385093 | 0,2562107 | 0,617529682 |
| 896 | ENSG00000081014 | -0,068406629 | 4,785463346 | 0,2645476 | 0,640302063 |
| 897 | ENSG00000081019 | 0,099188513  | 4,961014259 | 0,6852377 | 0,416225408 |
| 898 | ENSG00000081026 | 0,196666858  | 4,675543196 | 1,5447339 | 0,226376002 |
| 899 | ENSG00000081041 | 0,832138389  | 4,540083132 | 2,0655672 | 0,16405967  |
| 900 | ENSG00000081052 | 0,171730028  | 5,253900678 | 0,2834811 | 0,599510377 |
| 901 | ENSG00000081087 | -0,325678478 | 5,742603646 | 2,5964346 | 0,120677754 |
| 902 | ENSG00000081154 | -0,039559348 | 6,765727793 | 0,0660683 | 0,799424111 |
| 903 | ENSG00000081177 | -0,007248183 | 4,469155985 | 0,0063648 | 0,937096687 |
| 904 | ENSG00000081189 | -0,076494469 | 6,697331942 | 0,1697666 | 0,684115696 |
| 905 | ENSG00000081237 | 0,133408603  | 5,711637861 | 0,1748221 | 0,679720551 |
| 906 | ENSG00000081307 | -0,199443468 | 5,507881175 | 1,9201047 | 0,179053134 |
| 907 | ENSG00000081320 | 0,518010314  | 5,051158438 | 2,1271454 | 0,158166387 |
| 908 | ENSG00000081377 | 0,072615398  | 5,300807595 | 0,3705322 | 0,54863023  |
| 909 | ENSG00000081386 | 0,043771292  | 4,748250349 | 0,1171466 | 0,735232168 |
| 910 | ENSG00000081665 | 0,032516209  | 5,160905985 | 0,0472918 | 0,82975302  |
| 911 | ENSG00000081760 | -0,873447124 | 4,271655683 | 9,8805609 | 0,004536367 |
| 912 | ENSG00000081791 | 0,18424314   | 6,005606976 | 1,2849972 | 0,268593633 |
| 913 | ENSG00000081803 | -1,006865483 | 5,659226192 | 20,184034 | 0,000163177 |
| 914 | ENSG00000081870 | -0,257445757 | 3,913415948 | 2,1686448 | 0,183797191 |
| 915 | ENSG00000081913 | 0,035984374  | 3,690175121 | 0,0468665 | 0,887711171 |
| 916 | ENSG00000081923 | 0,006042421  | 4,432246659 | 0,0013884 | 0,970596248 |
| 917 | ENSG00000082014 | 0,301990379  | 5,292349432 | 3,7876999 | 0,06388741  |
| 918 | ENSG00000082068 | -0,018904627 | 4,640430106 | 0,0337421 | 0,927302382 |
| 919 | ENSG00000082074 | 0,161499674  | 4,085585697 | 0,2768687 | 0,603773991 |
| 920 | ENSG00000082146 | 0,004378525  | 5,279328817 | 0,0005133 | 0,982119271 |
| 921 | ENSG00000082153 | 0,114605462  | 7,294485933 | 0,2089788 | 0,651836749 |
| 922 | ENSG00000082175 | 0,152098509  | 5,387608919 | 1,0738944 | 0,310779721 |
| 923 | ENSG00000082212 | -0,463923302 | 6,407956778 | 8,1755969 | 0,008844195 |
| 924 | ENSG00000082213 | -0,14932892  | 4,600719549 | 0,9670149 | 0,335608383 |
| 925 | ENSG00000082258 | -0,095732758 | 5,94758019  | 0,3728465 | 0,547414845 |
| 926 | ENSG00000082269 | -0,172007536 | 5,439055459 | 1,0370009 | 0,319061746 |
| 927 | ENSG00000082397 | -0,696472324 | 5,264942219 | 8,5315678 | 0,007664697 |
| 928 | ENSG00000082438 | 0,758901395  | 5,917771723 | 3,0863669 | 0,092192957 |
| 929 | ENSG00000082458 | -0,114956641 | 4,669520548 | 0,8127041 | 0,376588444 |
| 930 | ENSG00000082497 | 0,71109811   | 3,688772901 | 10,408087 | 0,003721702 |
| 931 | ENSG00000082512 | 0,344846168  | 4,093074986 | 1,1702977 | 0,290498319 |
| 932 | ENSG00000082515 | -0,384487062 | 4,188403726 | 11,060646 | 0,016934381 |
| 933 | ENSG00000082516 | 0,006713968  | 4,915356333 | 0,0033017 | 0,954670563 |
| 934 | ENSG00000082641 | -0,072106681 | 8,854676805 | 0,1035408 | 0,750513332 |
| 935 | ENSG00000082701 | 0,01206397   | 6,065543232 | 0,0119159 | 0,91401471  |
| 936 | ENSG00000082781 | 0,707818349  | 6,043079811 | 12,492948 | 0,001762661 |
| 937 | ENSG00000082805 | 0,058999455  | 6,579818992 | 0,1425052 | 0,709247352 |
| 938 | ENSG00000082898 | 0,094541073  | 7,142803643 | 0,5676442 | 0,458776832 |
| 939 | ENSG00000082996 | -0,07575408  | 5,942653007 | 0,1559904 | 0,696496582 |
| 940 | ENSG00000083093 | -0,050512482 | 3,537799355 | 0,2182144 | 0,809162362 |
| 941 | ENSG00000083097 | 0,100682335  | 6,146203119 | 0,5040145 | 0,484823886 |
| 942 | ENSG00000083099 | -0,250337675 | 5,406675543 | 4,2136645 | 0,051548344 |

|      |                 |              |             |           |             |
|------|-----------------|--------------|-------------|-----------|-------------|
| 943  | ENSG00000083123 | -0,015144238 | 4,655243588 | 0,0144214 | 0,970173433 |
| 944  | ENSG00000083168 | -0,00488109  | 6,199103085 | 0,0011095 | 0,973713617 |
| 945  | ENSG00000083223 | 0,024229599  | 5,436878134 | 0,036264  | 0,85062821  |
| 946  | ENSG00000083290 | 0,533618834  | 4,885672919 | 18,787161 | 0,000240756 |
| 947  | ENSG00000083312 | 0,001942883  | 7,680079684 | 9,439E-05 | 0,992331658 |
| 948  | ENSG00000083444 | -0,085587631 | 5,68668746  | 0,1095207 | 0,743671978 |
| 949  | ENSG00000083520 | -0,07668615  | 5,81346149  | 0,2566254 | 0,617246757 |
| 950  | ENSG00000083535 | 0,002462154  | 5,002249593 | 0,0002368 | 0,987855019 |
| 951  | ENSG00000083544 | -0,173880022 | 6,039579315 | 0,8304662 | 0,371544855 |
| 952  | ENSG00000083642 | -0,057659136 | 5,957561577 | 0,1741501 | 0,68028831  |
| 953  | ENSG00000083720 | 0,184724713  | 7,815226876 | 0,4920407 | 0,490021674 |
| 954  | ENSG00000083750 | -0,132642182 | 4,20807342  | 1,0091605 | 0,43592815  |
| 955  | ENSG00000083799 | 0,33846903   | 6,243513033 | 6,7229109 | 0,016205796 |
| 956  | ENSG00000083814 | -0,004372128 | 3,785810038 | 0,001177  | 0,976753966 |
| 957  | ENSG00000083828 | -0,00791678  | 4,211815878 | 0,0026788 | 0,95916721  |
| 958  | ENSG00000083844 | 0,288833876  | 5,365400563 | 4,7911329 | 0,038928723 |
| 959  | ENSG00000083845 | 0,180441505  | 7,326712382 | 0,4742243 | 0,4979049   |
| 960  | ENSG00000083857 | 0,145100446  | 8,045597159 | 0,7606506 | 0,392064188 |
| 961  | ENSG00000083896 | 0,149620142  | 6,024041263 | 3,2573958 | 0,084102584 |
| 962  | ENSG00000083937 | -0,026898151 | 5,470010976 | 0,0271034 | 0,870665596 |
| 963  | ENSG00000084070 | 0,044656081  | 4,56106179  | 0,03491   | 0,85341474  |
| 964  | ENSG00000084072 | -0,194892247 | 4,626678848 | 2,6059095 | 0,168703863 |
| 965  | ENSG00000084073 | -0,340779687 | 5,749947451 | 5,1502372 | 0,032884626 |
| 966  | ENSG00000084090 | -0,338633487 | 7,153531035 | 6,040893  | 0,021865345 |
| 967  | ENSG00000084092 | -0,051399291 | 3,727664855 | 0,1505708 | 0,787699506 |
| 968  | ENSG00000084093 | 0,24023626   | 6,109747191 | 3,5752731 | 0,071202424 |
| 969  | ENSG00000084112 | 0,201647813  | 5,498562393 | 0,9649655 | 0,3361107   |
| 970  | ENSG00000084207 | 0,068487342  | 6,428944619 | 0,1031949 | 0,750915682 |
| 971  | ENSG00000084234 | 0,01221848   | 8,396885328 | 0,0078188 | 0,930298539 |
| 972  | ENSG00000084463 | 0,1530541    | 5,585505836 | 1,5857509 | 0,220460237 |
| 973  | ENSG00000084623 | -0,121265745 | 6,12588069  | 0,9834864 | 0,331573467 |
| 974  | ENSG00000084636 | 0,724591375  | 5,063998773 | 8,4168475 | 0,008024722 |
| 975  | ENSG00000084652 | 0,1087263    | 5,373892539 | 0,3588252 | 0,554985914 |
| 976  | ENSG00000084674 | 0,545836807  | 6,623352159 | 1,4906724 | 0,234421448 |
| 977  | ENSG00000084676 | -0,142509136 | 6,450775933 | 1,2643178 | 0,272338009 |
| 978  | ENSG00000084693 | 0,134249427  | 3,75009437  | 0,8839501 | 0,495748203 |
| 979  | ENSG00000084710 | 0,40906284   | 3,91091317  | 2,1178238 | 0,159041896 |
| 980  | ENSG00000084733 | -0,230127952 | 6,547752557 | 3,4776366 | 0,074906358 |
| 981  | ENSG00000084754 | -0,25799905  | 8,295809358 | 2,3230707 | 0,140988338 |
| 982  | ENSG00000084764 | -0,286732606 | 4,38436093  | 2,3690856 | 0,137339163 |
| 983  | ENSG00000084774 | 0,398054578  | 3,828746682 | 2,3808433 | 0,136413265 |
| 984  | ENSG00000085063 | -0,633894692 | 8,658667619 | 18,242036 | 0,000282121 |
| 985  | ENSG00000085224 | -0,070921633 | 7,724555161 | 0,2067069 | 0,653587514 |
| 986  | ENSG00000085231 | -0,277242033 | 3,979047971 | 1,1189539 | 0,301074788 |
| 987  | ENSG00000085274 | -0,186082058 | 4,626348314 | 0,8321044 | 0,371081727 |
| 988  | ENSG00000085276 | 0,359960501  | 5,319771195 | 5,0891608 | 0,033839231 |
| 989  | ENSG00000085365 | -0,232476451 | 6,142041165 | 0,8380703 | 0,369402232 |
| 990  | ENSG00000085377 | -0,058144505 | 4,83705698  | 0,2704925 | 0,607930587 |
| 991  | ENSG00000085382 | -0,055298144 | 4,71888435  | 0,1891797 | 0,682042976 |
| 992  | ENSG00000085415 | -0,060454922 | 4,517196102 | 0,1210499 | 0,731047307 |
| 993  | ENSG00000085433 | -0,009862894 | 4,696077832 | 0,00619   | 0,960957911 |
| 994  | ENSG00000085449 | 0,226065439  | 5,04768954  | 1,5789972 | 0,221457259 |
| 995  | ENSG00000085491 | -0,201199013 | 5,263902251 | 1,514275  | 0,230865039 |
| 996  | ENSG00000085511 | -0,152579768 | 5,715828891 | 1,7319508 | 0,201021183 |
| 997  | ENSG00000085662 | -1,434372183 | 7,612139216 | 18,659144 | 0,000251499 |
| 998  | ENSG00000085719 | -0,240260011 | 7,263535156 | 1,3573731 | 0,255877208 |
| 999  | ENSG00000085721 | 0,225981011  | 5,535826318 | 2,643006  | 0,117529567 |
| 1000 | ENSG00000085733 | 0,414307601  | 6,333645071 | 8,2502407 | 0,00857005  |
| 1001 | ENSG00000085760 | -0,562577684 | 5,710466054 | 5,9886446 | 0,02241215  |

|      |                 |              |             |           |             |
|------|-----------------|--------------|-------------|-----------|-------------|
| 1002 | ENSG00000085788 | 0,10212398   | 5,896518296 | 1,1127792 | 0,30234373  |
| 1003 | ENSG00000085831 | -0,490027325 | 3,866253339 | 4,3520174 | 0,048190306 |
| 1004 | ENSG00000085832 | 0,016141456  | 7,175376881 | 0,0228894 | 0,881053179 |
| 1005 | ENSG00000085871 | -0,254067663 | 5,140897384 | 2,4934163 | 0,127912924 |
| 1006 | ENSG00000085978 | 0,051394098  | 4,536515007 | 0,1908333 | 0,833300465 |
| 1007 | ENSG00000085982 | 0,027997032  | 5,353900204 | 0,066257  | 0,799256446 |
| 1008 | ENSG00000085998 | -0,090021364 | 5,989201929 | 0,3132444 | 0,581080131 |
| 1009 | ENSG00000086015 | -0,315691689 | 6,508707093 | 1,6535665 | 0,211208299 |
| 1010 | ENSG00000086061 | 0,068475523  | 6,646486602 | 0,1121018 | 0,740783392 |
| 1011 | ENSG00000086062 | 0,138452021  | 6,021704004 | 0,3181359 | 0,578162734 |
| 1012 | ENSG00000086065 | -0,051587033 | 5,827508527 | 0,0553877 | 0,816012983 |
| 1013 | ENSG00000086102 | 0,040037141  | 5,661381878 | 0,142025  | 0,709702079 |
| 1014 | ENSG00000086189 | -0,014565443 | 4,729073119 | 0,0107122 | 0,967134149 |
| 1015 | ENSG00000086200 | -0,006673149 | 5,279314597 | 0,0022378 | 0,962675754 |
| 1016 | ENSG00000086232 | 0,080887329  | 5,640817277 | 0,4242895 | 0,521206605 |
| 1017 | ENSG00000086289 | -0,146972364 | 4,510630038 | 0,819938  | 0,374541316 |
| 1018 | ENSG00000086475 | -0,008546337 | 4,863384104 | 0,0100634 | 0,97747326  |
| 1019 | ENSG00000086544 | -0,339291049 | 4,153318795 | 1,6691999 | 0,209135413 |
| 1020 | ENSG00000086589 | 0,21527988   | 4,837930488 | 4,2515245 | 0,091192284 |
| 1021 | ENSG00000086598 | -0,029036489 | 7,191081699 | 0,0315281 | 0,860614304 |
| 1022 | ENSG00000086619 | -0,07616785  | 4,499021375 | 0,2088393 | 0,651944826 |
| 1023 | ENSG00000086666 | -0,13862711  | 6,166193967 | 0,7636011 | 0,39119318  |
| 1024 | ENSG00000086712 | -0,057554685 | 4,36325451  | 0,1764162 | 0,711233015 |
| 1025 | ENSG00000086758 | 0,170118199  | 8,125873721 | 0,642873  | 0,430839119 |
| 1026 | ENSG00000086827 | -0,173797966 | 4,238741239 | 2,1210447 | 0,280630649 |
| 1027 | ENSG00000086848 | -0,083516584 | 3,839351425 | 0,1559197 | 0,696561722 |
| 1028 | ENSG00000086991 | 1,113328896  | 4,257035552 | 12,646349 | 0,001671757 |
| 1029 | ENSG00000087008 | -0,423215515 | 4,375077617 | 3,0786133 | 0,092578217 |
| 1030 | ENSG00000087053 | -0,106425498 | 5,287321916 | 0,6152977 | 0,440742464 |
| 1031 | ENSG00000087074 | 0,318653951  | 6,003552728 | 2,6362962 | 0,118008252 |
| 1032 | ENSG00000087086 | 0,369402973  | 9,474285628 | 1,4211172 | 0,245316051 |
| 1033 | ENSG00000087087 | 0,05562859   | 5,012860069 | 0,1161916 | 0,736281384 |
| 1034 | ENSG00000087095 | -0,17853545  | 4,841537531 | 2,2479981 | 0,147276589 |
| 1035 | ENSG00000087111 | -0,255661516 | 4,682683497 | 2,4670609 | 0,129845404 |
| 1036 | ENSG00000087116 | 0,571592537  | 4,128966061 | 2,8101671 | 0,107144756 |
| 1037 | ENSG00000087152 | 0,117998152  | 4,441971868 | 0,4194095 | 0,523613149 |
| 1038 | ENSG00000087157 | -0,343855065 | 3,859127012 | 2,9317871 | 0,100238075 |
| 1039 | ENSG00000087191 | -0,224492845 | 5,872980701 | 1,571074  | 0,222582623 |
| 1040 | ENSG00000087206 | 0,045873903  | 5,011916919 | 0,1898432 | 0,745940416 |
| 1041 | ENSG00000087245 | -0,353223748 | 7,080481066 | 2,6726347 | 0,115634951 |
| 1042 | ENSG00000087253 | -0,106021208 | 4,474434893 | 0,2458545 | 0,624691317 |
| 1043 | ENSG00000087258 | -0,325919653 | 5,219287802 | 0,8351547 | 0,370221644 |
| 1044 | ENSG00000087263 | 0,077067449  | 4,895633848 | 0,4212316 | 0,534421995 |
| 1045 | ENSG00000087266 | -0,196415858 | 4,542079373 | 0,8283245 | 0,372151571 |
| 1046 | ENSG00000087269 | 0,037238738  | 4,228914935 | 0,0459223 | 0,832196398 |
| 1047 | ENSG00000087274 | 0,074320184  | 7,186383872 | 0,1704407 | 0,683525214 |
| 1048 | ENSG00000087299 | -0,30229869  | 3,686491612 | 3,2169241 | 0,104325245 |
| 1049 | ENSG00000087301 | 0,426382889  | 4,351658875 | 3,8607946 | 0,061558543 |
| 1050 | ENSG00000087302 | -0,399075278 | 6,694065914 | 4,8693533 | 0,037540917 |
| 1051 | ENSG00000087303 | 0,147031232  | 4,459637067 | 0,4340244 | 0,516530853 |
| 1052 | ENSG00000087338 | 0,275922404  | 3,98825936  | 2,7342385 | 0,111738182 |
| 1053 | ENSG00000087365 | 0,145789138  | 6,258611078 | 0,6780265 | 0,418682809 |
| 1054 | ENSG00000087448 | 0,04258196   | 4,535007396 | 0,0841147 | 0,77437932  |
| 1055 | ENSG00000087460 | 0,069235725  | 9,334585985 | 0,15454   | 0,69782405  |
| 1056 | ENSG00000087470 | -0,249717717 | 6,691581412 | 2,45795   | 0,130521469 |
| 1057 | ENSG00000087502 | -0,393456805 | 6,294691063 | 2,1575029 | 0,155355042 |
| 1058 | ENSG00000087884 | -0,399610567 | 3,941133041 | 7,2267288 | 0,023203763 |
| 1059 | ENSG00000087995 | -0,134528152 | 4,210009937 | 1,4877235 | 0,402511785 |
| 1060 | ENSG00000088179 | 0,026923885  | 6,11530148  | 0,0254161 | 0,874719643 |

|      |                 |              |             |           |             |
|------|-----------------|--------------|-------------|-----------|-------------|
| 1061 | ENSG00000088205 | -0,026424492 | 5,89599252  | 0,0332413 | 0,856916744 |
| 1062 | ENSG00000088247 | 0,265527623  | 4,815571634 | 1,6871365 | 0,206788308 |
| 1063 | ENSG00000088256 | 0,008851951  | 4,932028291 | 0,0020952 | 0,963883974 |
| 1064 | ENSG00000088280 | -0,192241685 | 5,089049795 | 1,3524487 | 0,256717304 |
| 1065 | ENSG00000088298 | -0,077808294 | 3,866695922 | 0,1245184 | 0,727382536 |
| 1066 | ENSG00000088367 | 0,348209101  | 4,397537185 | 2,3237578 | 0,140979301 |
| 1067 | ENSG00000088387 | -0,090933101 | 6,48722595  | 0,3019188 | 0,587952342 |
| 1068 | ENSG00000088448 | -0,018732243 | 6,455715616 | 0,0102931 | 0,92006433  |
| 1069 | ENSG00000088538 | -0,009818838 | 4,107609164 | 0,0015556 | 0,968877102 |
| 1070 | ENSG00000088543 | -0,486315437 | 4,785689397 | 6,8529653 | 0,015347899 |
| 1071 | ENSG00000088682 | -0,292365967 | 6,079800602 | 2,8442133 | 0,105156918 |
| 1072 | ENSG00000088808 | -0,316280496 | 5,572104638 | 2,3434949 | 0,139380338 |
| 1073 | ENSG00000088812 | 0,110000905  | 5,990829586 | 1,0223168 | 0,322402374 |
| 1074 | ENSG00000088827 | -0,804057086 | 4,076593075 | 9,0195733 | 0,006319909 |
| 1075 | ENSG00000088832 | -0,162729332 | 6,414366464 | 1,7011103 | 0,204938098 |
| 1076 | ENSG00000088833 | -0,076376206 | 5,411838218 | 0,3878393 | 0,539512835 |
| 1077 | ENSG00000088854 | 0,194859395  | 5,838944095 | 1,2444507 | 0,276079686 |
| 1078 | ENSG00000088888 | 0,00953509   | 6,218380308 | 0,0017408 | 0,967078232 |
| 1079 | ENSG00000088930 | -0,222930595 | 6,347981362 | 2,5301372 | 0,125238327 |
| 1080 | ENSG00000088970 | 0,225813907  | 4,689901668 | 2,3314664 | 0,140344011 |
| 1081 | ENSG00000088986 | 0,089948188  | 6,097394287 | 0,1644918 | 0,688784228 |
| 1082 | ENSG00000089006 | 0,215170523  | 5,8593355   | 3,1928776 | 0,087038013 |
| 1083 | ENSG00000089009 | 0,063167749  | 8,754889363 | 0,0683588 | 0,796057285 |
| 1084 | ENSG00000089022 | -0,041636569 | 4,77935645  | 0,1557158 | 0,696737108 |
| 1085 | ENSG00000089048 | -0,038088764 | 4,837821957 | 0,0491949 | 0,826418274 |
| 1086 | ENSG00000089050 | 0,167606847  | 3,983483155 | 0,8975473 | 0,353240976 |
| 1087 | ENSG00000089053 | -0,134372103 | 6,359536465 | 2,2281383 | 0,148995766 |
| 1088 | ENSG00000089057 | 0,298537461  | 4,923232268 | 2,4256913 | 0,132948926 |
| 1089 | ENSG00000089060 | -0,277126944 | 3,881312568 | 2,5585297 | 0,123282344 |
| 1090 | ENSG00000089063 | -0,080107447 | 6,083221465 | 0,4741292 | 0,497923815 |
| 1091 | ENSG00000089123 | 0,297037283  | 3,858132331 | 4,0998216 | 0,088019737 |
| 1092 | ENSG00000089154 | 0,165532256  | 5,870098935 | 0,679867  | 0,418061011 |
| 1093 | ENSG00000089157 | 0,050054427  | 9,026816937 | 0,0376471 | 0,847848694 |
| 1094 | ENSG00000089159 | -0,170066962 | 5,018588735 | 0,4931488 | 0,489538443 |
| 1095 | ENSG00000089177 | 0,134134948  | 5,020376764 | 1,5184191 | 0,286033354 |
| 1096 | ENSG00000089195 | -0,183221541 | 3,936341064 | 2,3636961 | 0,304278521 |
| 1097 | ENSG00000089199 | 0,616865005  | 6,338517317 | 1,6748291 | 0,208395246 |
| 1098 | ENSG00000089220 | -0,1577885   | 8,02038795  | 1,4592814 | 0,239217938 |
| 1099 | ENSG00000089225 | 0,104425337  | 6,484366087 | 0,2263097 | 0,638739273 |
| 1100 | ENSG00000089234 | 0,081348637  | 4,373190757 | 0,5900468 | 0,52137293  |
| 1101 | ENSG00000089248 | 0,020696946  | 5,369887232 | 0,0241887 | 0,877751345 |
| 1102 | ENSG00000089280 | 0,106813015  | 6,544774115 | 0,3498593 | 0,559934057 |
| 1103 | ENSG00000089289 | -0,02020112  | 5,444928803 | 0,0118001 | 0,914434976 |
| 1104 | ENSG00000089335 | -0,182547574 | 5,902369422 | 1,1162125 | 0,301653962 |
| 1105 | ENSG00000089472 | 0,290549074  | 5,610390225 | 2,7034824 | 0,113664106 |
| 1106 | ENSG00000089486 | -0,212565341 | 4,614171081 | 1,0762556 | 0,310269032 |
| 1107 | ENSG00000089597 | 0,212563198  | 6,880186127 | 1,3193854 | 0,262451511 |
| 1108 | ENSG00000089682 | -0,055186877 | 4,216821905 | 0,1806368 | 0,789642147 |
| 1109 | ENSG00000089693 | -0,176236949 | 5,809052348 | 1,6104783 | 0,217012361 |
| 1110 | ENSG00000089737 | -0,056608685 | 7,465245343 | 0,1573029 | 0,69527754  |
| 1111 | ENSG00000089775 | 0,225564005  | 4,61445141  | 1,8852284 | 0,182916465 |
| 1112 | ENSG00000089818 | -0,014606126 | 4,715076464 | 0,0183864 | 0,911873574 |
| 1113 | ENSG00000089876 | -0,362203236 | 6,002072879 | 2,078639  | 0,162786782 |
| 1114 | ENSG00000089902 | 0,000204143  | 4,539632676 | 1,468E-06 | 0,999043763 |
| 1115 | ENSG00000089916 | -0,016113843 | 6,670117712 | 0,0163295 | 0,899418932 |
| 1116 | ENSG00000090006 | 0,504827823  | 6,714049214 | 5,7809829 | 0,024606215 |
| 1117 | ENSG00000090013 | -0,212388143 | 4,834120906 | 0,8002396 | 0,380243169 |
| 1118 | ENSG00000090054 | 0,077241738  | 5,481348714 | 0,3178431 | 0,578320976 |
| 1119 | ENSG00000090060 | -0,140126822 | 7,454018499 | 1,1597063 | 0,292600444 |

|      |                 |              |             |           |             |
|------|-----------------|--------------|-------------|-----------|-------------|
| 1120 | ENSG00000090097 | -0,043081367 | 4,763465926 | 0,0497939 | 0,825382674 |
| 1121 | ENSG00000090263 | -0,642504003 | 5,329517233 | 10,009373 | 0,004320789 |
| 1122 | ENSG00000090266 | -0,583994952 | 6,624142318 | 9,4634369 | 0,005319659 |
| 1123 | ENSG00000090273 | -0,302057414 | 5,839857303 | 2,5420968 | 0,12443206  |
| 1124 | ENSG00000090316 | 0,076328055  | 4,834180322 | 0,3797096 | 0,65220607  |
| 1125 | ENSG00000090339 | -0,142557014 | 4,416052068 | 0,2600676 | 0,614909224 |
| 1126 | ENSG00000090372 | 0,106136605  | 4,463962599 | 0,4669649 | 0,58215899  |
| 1127 | ENSG00000090376 | 0,086553863  | 5,697971115 | 0,0680649 | 0,796485856 |
| 1128 | ENSG00000090382 | 0,150527771  | 5,110589681 | 0,1639629 | 0,689257177 |
| 1129 | ENSG00000090432 | -0,249534882 | 4,660121312 | 2,3118956 | 0,141950809 |
| 1130 | ENSG00000090470 | 0,266847626  | 3,895460406 | 6,6661263 | 0,136116976 |
| 1131 | ENSG00000090487 | -0,056260999 | 5,286274039 | 0,3127461 | 0,582037814 |
| 1132 | ENSG00000090520 | -0,103904755 | 4,635687034 | 0,2839438 | 0,599214406 |
| 1133 | ENSG00000090565 | 0,490578561  | 4,51303601  | 6,9931567 | 0,014454582 |
| 1134 | ENSG00000090612 | 0,064027264  | 4,907935542 | 0,1123077 | 0,740554558 |
| 1135 | ENSG00000090615 | 0,461662585  | 6,06323374  | 5,3143969 | 0,030464852 |
| 1136 | ENSG00000090621 | 0,081629954  | 6,837507991 | 0,2484227 | 0,622897937 |
| 1137 | ENSG00000090659 | -1,265605233 | 4,008935103 | 22,298005 | 9,19837E-05 |
| 1138 | ENSG00000090686 | 0,062309797  | 5,901057831 | 0,3174411 | 0,578556434 |
| 1139 | ENSG00000090776 | -0,020402474 | 3,903423091 | 0,0076317 | 0,931138367 |
| 1140 | ENSG00000090857 | 0,295003336  | 5,570998494 | 1,4325953 | 0,243474273 |
| 1141 | ENSG00000090861 | -0,093813379 | 6,106784994 | 0,319395  | 0,5774166   |
| 1142 | ENSG00000090863 | 0,221302317  | 7,270139537 | 1,4128289 | 0,246657128 |
| 1143 | ENSG00000090905 | 0,002695449  | 6,453150584 | 0,0002434 | 0,987687208 |
| 1144 | ENSG00000090989 | -0,139779549 | 5,443589751 | 1,2993761 | 0,26596247  |
| 1145 | ENSG00000091009 | 0,076680996  | 4,663262902 | 0,3855478 | 0,540703536 |
| 1146 | ENSG00000091039 | 0,117108845  | 6,762037638 | 0,2723584 | 0,60671989  |
| 1147 | ENSG00000091136 | 0,245441355  | 7,440537934 | 1,0468905 | 0,316814812 |
| 1148 | ENSG00000091140 | -0,380118942 | 7,432202881 | 2,7944286 | 0,108078478 |
| 1149 | ENSG00000091157 | -0,084469887 | 5,652687973 | 0,6923827 | 0,4138407   |
| 1150 | ENSG00000091164 | -0,354874003 | 6,083114076 | 6,655125  | 0,016688243 |
| 1151 | ENSG00000091317 | 0,12109496   | 5,367183746 | 0,4579824 | 0,505285524 |
| 1152 | ENSG00000091409 | -0,374480944 | 6,619795938 | 3,9642213 | 0,058426379 |
| 1153 | ENSG00000091428 | -0,102576384 | 4,816114555 | 0,276985  | 0,603698396 |
| 1154 | ENSG00000091436 | -0,030498218 | 8,593280017 | 0,0191185 | 0,891224819 |
| 1155 | ENSG00000091482 | -0,908276911 | 7,816403045 | 7,1843488 | 0,013327678 |
| 1156 | ENSG00000091483 | -0,427559675 | 7,171883617 | 4,1129305 | 0,054234881 |
| 1157 | ENSG00000091513 | 0,282053586  | 5,056509304 | 0,1660854 | 0,687364631 |
| 1158 | ENSG00000091527 | 0,087924296  | 7,170883834 | 0,4149098 | 0,525807279 |
| 1159 | ENSG00000091542 | -0,123348782 | 6,433560376 | 0,6320768 | 0,434683267 |
| 1160 | ENSG00000091592 | 0,590906861  | 4,488650616 | 5,1454959 | 0,032957642 |
| 1161 | ENSG00000091640 | -0,27965572  | 5,763653156 | 2,5458725 | 0,124166777 |
| 1162 | ENSG00000091656 | 0,922867553  | 3,944171632 | 6,778426  | 0,015847647 |
| 1163 | ENSG00000091732 | -0,223984711 | 3,924238037 | 4,0403272 | 0,191929269 |
| 1164 | ENSG00000091831 | 0,428993302  | 3,980296224 | 4,5825731 | 0,0430729   |
| 1165 | ENSG00000091879 | -0,192011749 | 3,991490835 | 0,6614167 | 0,424359287 |
| 1166 | ENSG00000091972 | 1,202834389  | 4,56954564  | 4,0490044 | 0,055993423 |
| 1167 | ENSG00000091986 | 0,573414757  | 9,122308702 | 2,0014858 | 0,170476808 |
| 1168 | ENSG00000092010 | 0,168410843  | 5,546980754 | 1,4282236 | 0,2441406   |
| 1169 | ENSG00000092020 | -0,263005014 | 4,577340093 | 0,9382908 | 0,342745624 |
| 1170 | ENSG00000092054 | 1,180522596  | 11,6605036  | 3,9267561 | 0,059539566 |
| 1171 | ENSG00000092094 | 0,199651365  | 4,381437391 | 2,3195996 | 0,193493475 |
| 1172 | ENSG00000092108 | -0,109454011 | 5,997907661 | 0,3062998 | 0,585274229 |
| 1173 | ENSG00000092140 | -0,062598822 | 4,712924012 | 0,1508032 | 0,701322944 |
| 1174 | ENSG00000092148 | -0,030684565 | 8,07589203  | 0,0743578 | 0,787507395 |
| 1175 | ENSG00000092199 | -0,015218322 | 7,968339962 | 0,0135617 | 0,90829472  |
| 1176 | ENSG00000092201 | 0,190079419  | 6,17201527  | 4,2268266 | 0,051213657 |
| 1177 | ENSG00000092203 | -0,047646816 | 5,902993303 | 0,1890248 | 0,667747909 |
| 1178 | ENSG00000092330 | -0,052296082 | 4,839603062 | 0,1356618 | 0,715975764 |

|      |                 |              |             |           |             |
|------|-----------------|--------------|-------------|-----------|-------------|
| 1179 | ENSG00000092421 | -0,413267251 | 4,592171448 | 4,3513707 | 0,048205593 |
| 1180 | ENSG00000092439 | -0,000678444 | 6,943422602 | 2,065E-05 | 0,996413503 |
| 1181 | ENSG00000092531 | -0,020366274 | 4,648131531 | 0,0225275 | 0,977001474 |
| 1182 | ENSG00000092621 | 0,929238292  | 4,079989335 | 5,5373417 | 0,027491106 |
| 1183 | ENSG00000092820 | 0,384011538  | 7,62799705  | 3,8610155 | 0,061551655 |
| 1184 | ENSG00000092841 | -0,154172445 | 8,283569544 | 0,4955426 | 0,488497409 |
| 1185 | ENSG00000092847 | 0,117663408  | 5,817254078 | 0,3772306 | 0,545087953 |
| 1186 | ENSG00000092871 | 0,261994626  | 3,596844743 | 2,7184101 | 0,194233118 |
| 1187 | ENSG00000092931 | -0,217844874 | 4,806977544 | 3,1032383 | 0,091314852 |
| 1188 | ENSG00000092964 | 0,069304976  | 7,578338022 | 0,1419148 | 0,709821229 |
| 1189 | ENSG00000092978 | -0,070344831 | 4,730952713 | 0,3363234 | 0,636343164 |
| 1190 | ENSG00000093000 | 0,191129025  | 5,019582931 | 2,4099782 | 0,134103579 |
| 1191 | ENSG00000093010 | 0,034035719  | 4,553261387 | 0,0232411 | 0,880154749 |
| 1192 | ENSG00000093072 | 0,206586003  | 5,035855251 | 0,4192869 | 0,523673314 |
| 1193 | ENSG00000093144 | -0,175140398 | 5,836754126 | 0,460257  | 0,504240387 |
| 1194 | ENSG00000093167 | -0,179220255 | 7,420139043 | 0,7734788 | 0,388195644 |
| 1195 | ENSG00000093183 | 0,121424314  | 5,260631028 | 1,0749051 | 0,310528943 |
| 1196 | ENSG00000094631 | 0,173325992  | 4,769829561 | 0,9687968 | 0,335172512 |
| 1197 | ENSG00000094841 | -0,088751077 | 3,874685758 | 0,6007274 | 0,628313705 |
| 1198 | ENSG00000094880 | -0,051103331 | 4,658135915 | 0,1712019 | 0,771211886 |
| 1199 | ENSG00000094914 | 0,063255214  | 4,613293073 | 0,2316557 | 0,728572409 |
| 1200 | ENSG00000094916 | 0,214116372  | 6,990933344 | 1,7522575 | 0,198537478 |
| 1201 | ENSG00000094963 | 0,922876964  | 6,868477418 | 7,2838784 | 0,012779777 |
| 1202 | ENSG00000094975 | -0,021947533 | 5,936679707 | 0,019911  | 0,889008449 |
| 1203 | ENSG00000095002 | -0,033935967 | 4,649587741 | 0,0305958 | 0,862668502 |
| 1204 | ENSG00000095015 | 0,068840379  | 5,359721859 | 0,1329282 | 0,718729728 |
| 1205 | ENSG00000095066 | 0,209397268  | 4,294152653 | 0,7659145 | 0,390488075 |
| 1206 | ENSG00000095139 | 0,186815619  | 6,814683528 | 3,9508196 | 0,058779415 |
| 1207 | ENSG00000095203 | -0,179755447 | 4,98751743  | 0,4392711 | 0,514030272 |
| 1208 | ENSG00000095209 | -0,833589402 | 5,583297127 | 7,3623669 | 0,012365254 |
| 1209 | ENSG00000095261 | 0,033432002  | 4,573240622 | 0,1049471 | 0,748875008 |
| 1210 | ENSG00000095303 | 1,982997281  | 4,752057881 | 13,53391  | 0,001236858 |
| 1211 | ENSG00000095319 | 0,07751542   | 5,010260838 | 0,1852447 | 0,670891068 |
| 1212 | ENSG00000095321 | -0,127384622 | 5,123268844 | 0,4250801 | 0,520844466 |
| 1213 | ENSG00000095380 | -0,349121949 | 3,994047515 | 6,6296449 | 0,043623856 |
| 1214 | ENSG00000095485 | 0,00343315   | 4,323264689 | 0,0010823 | 0,974036952 |
| 1215 | ENSG00000095564 | 0,127799548  | 6,276035097 | 0,4571957 | 0,505647883 |
| 1216 | ENSG00000095574 | 0,091530376  | 4,53937361  | 0,465237  | 0,501941917 |
| 1217 | ENSG00000095637 | 0,029087594  | 9,390170399 | 0,0135334 | 0,908393571 |
| 1218 | ENSG00000095739 | 0,413150553  | 4,812420827 | 6,0991856 | 0,021333661 |
| 1219 | ENSG00000095787 | 0,003171957  | 6,872506841 | 0,0011101 | 0,973706465 |
| 1220 | ENSG00000095794 | -0,361902378 | 5,147550917 | 2,0622832 | 0,164381343 |
| 1221 | ENSG00000095951 | -0,02873904  | 5,407210605 | 0,0517211 | 0,82208777  |
| 1222 | ENSG00000096060 | -0,942089026 | 6,557474048 | 3,9042927 | 0,060218559 |
| 1223 | ENSG00000096063 | -0,220107917 | 4,43156145  | 2,9292859 | 0,138756263 |
| 1224 | ENSG00000096070 | 0,007379586  | 4,300970127 | 0,0010342 | 0,974621168 |
| 1225 | ENSG00000096093 | 0,385600704  | 4,430375508 | 4,7415699 | 0,039900634 |
| 1226 | ENSG00000096384 | 0,170765718  | 9,397086502 | 1,0114032 | 0,324944211 |
| 1227 | ENSG00000096401 | -0,049924179 | 6,121739497 | 0,0729621 | 0,789468988 |
| 1228 | ENSG00000096433 | -0,015140616 | 4,234570087 | 0,0029148 | 0,957408288 |
| 1229 | ENSG00000096696 | -0,278207797 | 9,111969479 | 0,9537516 | 0,338877889 |
| 1230 | ENSG00000096717 | 0,195274233  | 4,913996673 | 1,9378117 | 0,177129577 |
| 1231 | ENSG00000096746 | 0,029950955  | 5,911786656 | 0,0486579 | 0,827345461 |
| 1232 | ENSG00000096872 | 0,107546832  | 4,181391989 | 0,3938147 | 0,536452233 |
| 1233 | ENSG00000096968 | 0,294027653  | 5,995312266 | 0,9780668 | 0,332917541 |
| 1234 | ENSG00000097007 | -0,320966062 | 5,486064278 | 1,7704442 | 0,196306463 |
| 1235 | ENSG00000097033 | 0,02975316   | 7,394026602 | 0,04136   | 0,840618211 |
| 1236 | ENSG00000097096 | -0,127024886 | 4,906945274 | 0,4712415 | 0,499246172 |
| 1237 | ENSG00000099139 | -0,322258066 | 4,717215446 | 2,0383174 | 0,166752081 |

|      |                 |              |             |           |             |
|------|-----------------|--------------|-------------|-----------|-------------|
| 1238 | ENSG00000099194 | -0,23211631  | 9,07858745  | 0,116355  | 0,736103392 |
| 1239 | ENSG00000099204 | -0,206309759 | 9,41956903  | 0,7498246 | 0,395431708 |
| 1240 | ENSG00000099219 | 0,186529249  | 5,592478202 | 0,8830846 | 0,357076218 |
| 1241 | ENSG00000099246 | -0,1810065   | 6,547529948 | 0,7316543 | 0,401127862 |
| 1242 | ENSG00000099250 | 0,125819385  | 7,400227083 | 0,5538137 | 0,464262957 |
| 1243 | ENSG00000099260 | -0,441380909 | 6,966652086 | 7,5448372 | 0,011457818 |
| 1244 | ENSG00000099290 | -0,595988204 | 7,379312749 | 5,3830002 | 0,029513155 |
| 1245 | ENSG00000099331 | 0,094953022  | 4,875104199 | 0,200665  | 0,658355385 |
| 1246 | ENSG00000099341 | 0,060781592  | 6,667114843 | 0,0958453 | 0,759647539 |
| 1247 | ENSG00000099622 | 0,10005559   | 7,470658991 | 0,5271015 | 0,475091091 |
| 1248 | ENSG00000099725 | 0,493719688  | 3,619438145 | 0,7984985 | 0,380753244 |
| 1249 | ENSG00000099783 | 0,031443457  | 6,366528723 | 0,0704099 | 0,793085035 |
| 1250 | ENSG00000099785 | -0,061243024 | 5,114573443 | 0,0780664 | 0,782420132 |
| 1251 | ENSG00000099795 | -0,195672691 | 5,641103843 | 0,5657163 | 0,459557934 |
| 1252 | ENSG00000099797 | -0,238257731 | 4,756447004 | 1,4714762 | 0,237365424 |
| 1253 | ENSG00000099810 | -0,009791089 | 4,867978202 | 0,0071844 | 0,960301702 |
| 1254 | ENSG00000099817 | -0,055818892 | 5,405877129 | 0,0885815 | 0,768647125 |
| 1255 | ENSG00000099860 | -0,098747492 | 5,931299487 | 0,1110213 | 0,741988078 |
| 1256 | ENSG00000099875 | -0,121868688 | 5,664693505 | 0,369006  | 0,549468791 |
| 1257 | ENSG00000099901 | 0,106719358  | 4,258530897 | 0,5655473 | 0,533510965 |
| 1258 | ENSG00000099910 | 0,072850677  | 3,841529287 | 0,177587  | 0,757164344 |
| 1259 | ENSG00000099917 | 0,033407138  | 4,590352795 | 0,0316843 | 0,860273308 |
| 1260 | ENSG00000099940 | -0,071494469 | 4,668852612 | 0,2641953 | 0,612118003 |
| 1261 | ENSG00000099942 | -0,035567273 | 6,152554599 | 0,0881202 | 0,769222792 |
| 1262 | ENSG00000099954 | -0,18575323  | 3,913024749 | 0,4719524 | 0,498925947 |
| 1263 | ENSG00000099956 | -0,186731979 | 4,592197309 | 0,9783525 | 0,332848396 |
| 1264 | ENSG00000099968 | -0,175404036 | 6,074512829 | 1,7450712 | 0,199382996 |
| 1265 | ENSG00000099991 | -0,098573109 | 5,308881474 | 0,2399726 | 0,628843501 |
| 1266 | ENSG00000099995 | 0,133182146  | 5,490817209 | 0,4201214 | 0,523264121 |
| 1267 | ENSG00000100014 | 0,225498737  | 4,655363213 | 3,2160786 | 0,112008493 |
| 1268 | ENSG00000100023 | 0,088508297  | 4,362464689 | 0,2563137 | 0,617459371 |
| 1269 | ENSG00000100028 | -0,053475609 | 4,949581343 | 0,1389612 | 0,712707844 |
| 1270 | ENSG00000100029 | 0,005794677  | 4,284711859 | 0,0010564 | 0,974350015 |
| 1271 | ENSG00000100030 | 0,153652593  | 6,911480415 | 3,0214772 | 0,095428947 |
| 1272 | ENSG00000100034 | 0,237498479  | 4,579877899 | 1,8343075 | 0,188713307 |
| 1273 | ENSG00000100055 | -0,26914585  | 3,937140852 | 1,0634777 | 0,313094475 |
| 1274 | ENSG00000100077 | -0,566205167 | 5,435255811 | 4,1735294 | 0,052625443 |
| 1275 | ENSG00000100083 | 0,113847474  | 4,327869044 | 0,5257307 | 0,560932306 |
| 1276 | ENSG00000100097 | -0,032905141 | 7,344871932 | 0,0137242 | 0,907752943 |
| 1277 | ENSG00000100099 | 0,058763889  | 4,399149968 | 0,1468472 | 0,757006547 |
| 1278 | ENSG00000100100 | 0,748925431  | 4,717118774 | 9,1679204 | 0,005964299 |
| 1279 | ENSG00000100104 | -0,237994266 | 3,798384603 | 3,5317091 | 0,19290799  |
| 1280 | ENSG00000100105 | 0,505715242  | 3,698502069 | 6,2019112 | 0,020382947 |
| 1281 | ENSG00000100106 | 0,021302154  | 5,800804772 | 0,0166631 | 0,898406596 |
| 1282 | ENSG00000100109 | 0,107374183  | 4,234528209 | 0,9198172 | 0,550868495 |
| 1283 | ENSG00000100129 | 0,315572757  | 6,708906347 | 2,5921049 | 0,120971963 |
| 1284 | ENSG00000100138 | -0,401920762 | 6,329955473 | 4,9778595 | 0,035659752 |
| 1285 | ENSG00000100154 | 0,239269343  | 5,018558166 | 1,3152565 | 0,26317923  |
| 1286 | ENSG00000100170 | -0,797809628 | 6,022437748 | 4,0990455 | 0,054611456 |
| 1287 | ENSG00000100196 | 0,670756268  | 3,998348099 | 14,808375 | 0,000813996 |
| 1288 | ENSG00000100201 | 0,078268775  | 8,956849475 | 0,1862233 | 0,670063433 |
| 1289 | ENSG00000100207 | 0,149863812  | 4,616008038 | 0,5347256 | 0,471975962 |
| 1290 | ENSG00000100211 | -0,075784811 | 3,898743324 | 0,3139112 | 0,673229778 |
| 1291 | ENSG00000100216 | -0,137399801 | 5,252168499 | 1,8621117 | 0,213403996 |
| 1292 | ENSG00000100219 | -0,08867254  | 6,391481065 | 0,2560355 | 0,617649302 |
| 1293 | ENSG00000100220 | -0,03546019  | 5,63488073  | 0,1178132 | 0,734510151 |
| 1294 | ENSG00000100221 | 0,358018844  | 5,151961177 | 3,8048355 | 0,063332582 |
| 1295 | ENSG00000100225 | 0,161293201  | 5,956465509 | 2,5532587 | 0,123602598 |
| 1296 | ENSG00000100226 | 0,247797425  | 4,743371916 | 1,5957363 | 0,219103202 |

|      |                 |              |             |           |             |
|------|-----------------|--------------|-------------|-----------|-------------|
| 1297 | ENSG00000100227 | 0,145645352  | 5,185975106 | 0,6911956 | 0,414264895 |
| 1298 | ENSG00000100234 | -0,007473513 | 9,434858165 | 0,000778  | 0,977986567 |
| 1299 | ENSG00000100239 | -0,147622069 | 5,427618188 | 0,9094025 | 0,35014077  |
| 1300 | ENSG00000100241 | 0,2572342    | 4,905240361 | 1,4226266 | 0,24507283  |
| 1301 | ENSG00000100242 | 0,013294046  | 5,546087967 | 0,0027773 | 0,958423852 |
| 1302 | ENSG00000100243 | -0,051530393 | 7,371185528 | 0,0820897 | 0,777037846 |
| 1303 | ENSG00000100266 | -0,067096413 | 5,697635768 | 0,2099703 | 0,651063895 |
| 1304 | ENSG00000100280 | -0,009187513 | 5,120493079 | 0,0020427 | 0,964339333 |
| 1305 | ENSG00000100281 | 0,060696589  | 4,104171741 | 0,3794723 | 0,706027182 |
| 1306 | ENSG00000100284 | 0,086115735  | 4,983127513 | 0,2357304 | 0,631877764 |
| 1307 | ENSG00000100292 | -1,116007984 | 4,509581283 | 5,5251623 | 0,027644918 |
| 1308 | ENSG00000100296 | -0,2802694   | 4,717144778 | 4,540052  | 0,043929742 |
| 1309 | ENSG00000100300 | 0,001671487  | 4,563428679 | 5,382E-05 | 0,994209377 |
| 1310 | ENSG00000100307 | 0,162842594  | 5,529843999 | 0,8553274 | 0,364605511 |
| 1311 | ENSG00000100316 | 0,416606897  | 8,920237199 | 2,1188823 | 0,158942192 |
| 1312 | ENSG00000100320 | 0,039933317  | 6,900763086 | 0,1377066 | 0,713939664 |
| 1313 | ENSG00000100321 | -0,224996835 | 4,711544317 | 1,3088398 | 0,264315409 |
| 1314 | ENSG00000100325 | 0,101567757  | 4,783118012 | 0,3915071 | 0,537638443 |
| 1315 | ENSG00000100330 | 0,339171086  | 3,83982552  | 5,4590892 | 0,066270437 |
| 1316 | ENSG00000100335 | -0,113465706 | 4,717452169 | 0,7382809 | 0,399005793 |
| 1317 | ENSG00000100342 | -0,022681455 | 4,857089603 | 0,0058065 | 0,939915216 |
| 1318 | ENSG00000100345 | 0,140267663  | 8,086512254 | 0,355691  | 0,556705937 |
| 1319 | ENSG00000100347 | -0,298650958 | 5,338969474 | 6,5785667 | 0,017252358 |
| 1320 | ENSG00000100348 | -0,236154329 | 5,445440271 | 2,1312225 | 0,157785279 |
| 1321 | ENSG00000100353 | 0,076621421  | 6,431083251 | 0,2659511 | 0,610952048 |
| 1322 | ENSG00000100354 | 0,170533483  | 7,038561823 | 0,6261327 | 0,436822853 |
| 1323 | ENSG00000100360 | 0,177823976  | 3,780845772 | 1,0188159 | 0,394617788 |
| 1324 | ENSG00000100364 | 0,063007216  | 4,556753391 | 0,1222711 | 0,729750353 |
| 1325 | ENSG00000100376 | 0,188039533  | 4,345746185 | 0,4952036 | 0,488644609 |
| 1326 | ENSG00000100380 | 0,127005816  | 7,498828797 | 0,9500116 | 0,339772973 |
| 1327 | ENSG00000100387 | -0,222219109 | 5,462442732 | 1,9266571 | 0,178360429 |
| 1328 | ENSG00000100393 | 0,20225515   | 5,89975363  | 0,7300544 | 0,401635312 |
| 1329 | ENSG00000100395 | 0,046276132  | 3,96137956  | 0,0743744 | 0,857607185 |
| 1330 | ENSG00000100401 | -0,054835938 | 4,675876358 | 0,0767675 | 0,784189671 |
| 1331 | ENSG00000100403 | 0,327311923  | 5,387009479 | 2,0883699 | 0,161846958 |
| 1332 | ENSG00000100410 | -0,243882318 | 3,808728706 | 3,2858254 | 0,19276724  |
| 1333 | ENSG00000100412 | 0,080985505  | 7,650268476 | 0,1119063 | 0,741000929 |
| 1334 | ENSG00000100416 | -0,250240563 | 4,649375409 | 2,8272224 | 0,106124485 |
| 1335 | ENSG00000100418 | -0,747703338 | 6,118093114 | 12,973919 | 0,001494337 |
| 1336 | ENSG00000100422 | 0,161303482  | 6,13177941  | 1,6775098 | 0,207999729 |
| 1337 | ENSG00000100425 | 0,167691361  | 4,089626705 | 1,0642096 | 0,369624355 |
| 1338 | ENSG00000100426 | -0,08265478  | 3,725041436 | 0,2460304 | 0,624568109 |
| 1339 | ENSG00000100439 | -0,009054402 | 4,105515339 | 0,0031846 | 0,955482316 |
| 1340 | ENSG00000100441 | 0,177777294  | 5,084559796 | 0,8596565 | 0,363416318 |
| 1341 | ENSG00000100442 | -0,607250397 | 5,454406328 | 13,94729  | 0,001077976 |
| 1342 | ENSG00000100461 | 0,032573618  | 5,415749197 | 0,0694801 | 0,794422928 |
| 1343 | ENSG00000100462 | -0,002579929 | 4,25538676  | 0,0004702 | 0,982886254 |
| 1344 | ENSG00000100478 | -0,098347893 | 4,298332477 | 0,7657551 | 0,501025674 |
| 1345 | ENSG00000100485 | 0,141920785  | 6,300188919 | 1,3174085 | 0,262759047 |
| 1346 | ENSG00000100503 | -0,014777319 | 7,532124829 | 0,0061015 | 0,938411403 |
| 1347 | ENSG00000100504 | 0,36322442   | 5,072291202 | 0,7122395 | 0,407351757 |
| 1348 | ENSG00000100519 | -0,417097074 | 6,417275989 | 2,5921791 | 0,120966913 |
| 1349 | ENSG00000100523 | -0,087041589 | 5,206073001 | 0,4447499 | 0,511419196 |
| 1350 | ENSG00000100528 | -0,090165221 | 6,203384267 | 0,2160198 | 0,64643837  |
| 1351 | ENSG00000100532 | -0,200867237 | 4,331167846 | 1,2485832 | 0,275304261 |
| 1352 | ENSG00000100554 | -0,377715915 | 6,630919615 | 2,6121273 | 0,11961844  |
| 1353 | ENSG00000100567 | -0,524099351 | 5,936294333 | 13,320283 | 0,001324989 |
| 1354 | ENSG00000100568 | -0,100110048 | 5,76724676  | 0,6439563 | 0,430428048 |
| 1355 | ENSG00000100578 | -0,045677087 | 5,017389249 | 0,1284325 | 0,723304087 |



|      |                 |              |             |           |             |
|------|-----------------|--------------|-------------|-----------|-------------|
| 1356 | ENSG00000100580 | 0,215386305  | 4,736487131 | 2,3527272 | 0,138603876 |
| 1357 | ENSG00000100591 | -0,340420719 | 6,190080752 | 3,8082126 | 0,063223882 |
| 1358 | ENSG00000100592 | -0,024744574 | 6,789169743 | 0,0301692 | 0,863614516 |
| 1359 | ENSG00000100596 | -0,007890753 | 5,653377767 | 0,0024705 | 0,960785428 |
| 1360 | ENSG00000100600 | -0,300183656 | 6,432810327 | 3,5054944 | 0,073872181 |
| 1361 | ENSG00000100603 | -0,068460601 | 5,464185181 | 0,2824241 | 0,600169988 |
| 1362 | ENSG00000100605 | -0,121047253 | 5,402733522 | 0,3016086 | 0,58814292  |
| 1363 | ENSG00000100612 | -0,23152368  | 4,957459745 | 3,2792968 | 0,083132192 |
| 1364 | ENSG00000100614 | -0,132299015 | 7,286927937 | 0,6209752 | 0,438692801 |
| 1365 | ENSG00000100626 | -0,597589237 | 5,512408788 | 4,1747421 | 0,052593794 |
| 1366 | ENSG00000100628 | -0,619969746 | 5,985474999 | 4,6674474 | 0,041345577 |
| 1367 | ENSG00000100632 | -0,128379397 | 5,211492455 | 0,7507894 | 0,395127553 |
| 1368 | ENSG00000100644 | 0,011464201  | 6,783278117 | 0,0041925 | 0,948930491 |
| 1369 | ENSG00000100647 | 0,140684564  | 4,954598985 | 0,538259  | 0,470532273 |
| 1370 | ENSG00000100650 | 0,030857648  | 7,556450161 | 0,0592073 | 0,80989235  |
| 1371 | ENSG00000100664 | 0,062320913  | 7,935183841 | 0,2335609 | 0,633426852 |
| 1372 | ENSG00000100697 | -0,079449419 | 6,827474657 | 0,4151753 | 0,525676023 |
| 1373 | ENSG00000100711 | 0,293122583  | 4,123546636 | 3,1990619 | 0,093564639 |
| 1374 | ENSG00000100714 | 0,19848416   | 5,580368716 | 1,6494    | 0,211765077 |
| 1375 | ENSG00000100722 | 0,003330627  | 5,601580652 | 0,0008339 | 0,977210134 |
| 1376 | ENSG00000100731 | -0,067752471 | 7,308297324 | 0,3678057 | 0,550093291 |
| 1377 | ENSG00000100744 | -0,152825641 | 4,038065448 | 0,4559975 | 0,506200643 |
| 1378 | ENSG00000100749 | -0,01668323  | 3,778845156 | 0,0050459 | 0,943981507 |
| 1379 | ENSG00000100764 | -0,338215775 | 5,535403737 | 2,2909795 | 0,143683333 |
| 1380 | ENSG00000100784 | -0,271266622 | 4,563187858 | 1,7388268 | 0,200205224 |
| 1381 | ENSG00000100796 | 0,026492833  | 5,905015654 | 0,0505139 | 0,824139674 |
| 1382 | ENSG00000100804 | -0,307978208 | 5,832442747 | 5,4908364 | 0,028050582 |
| 1383 | ENSG00000100811 | 0,117171291  | 6,022311671 | 0,9088795 | 0,350242593 |
| 1384 | ENSG00000100813 | 0,026851731  | 6,374610453 | 0,0264824 | 0,872142268 |
| 1385 | ENSG00000100814 | -0,326559995 | 5,712915167 | 4,8766788 | 0,037407142 |
| 1386 | ENSG00000100815 | 0,032619598  | 6,880874265 | 0,0730837 | 0,789289762 |
| 1387 | ENSG00000100823 | -0,066713582 | 5,173457054 | 0,2135703 | 0,648295156 |
| 1388 | ENSG00000100836 | -0,004719739 | 5,037677273 | 0,0008555 | 0,976916683 |
| 1389 | ENSG00000100852 | -0,300095066 | 8,471055899 | 1,1063576 | 0,303748388 |
| 1390 | ENSG00000100865 | -0,203580123 | 4,146901999 | 2,0684293 | 0,230028871 |
| 1391 | ENSG00000100883 | -0,097164046 | 5,583481033 | 0,4372717 | 0,514978593 |
| 1392 | ENSG00000100888 | 0,117186006  | 6,119686927 | 0,6688508 | 0,421782598 |
| 1393 | ENSG00000100897 | -0,060970784 | 5,603047127 | 0,2476948 | 0,623388748 |
| 1394 | ENSG00000100906 | 0,49088426   | 6,091442364 | 3,0269136 | 0,095195247 |
| 1395 | ENSG00000100911 | -0,098286443 | 4,962931873 | 0,4774063 | 0,496466417 |
| 1396 | ENSG00000100916 | -0,222834025 | 4,015353599 | 2,5719279 | 0,20083652  |
| 1397 | ENSG00000100934 | -0,21280094  | 6,988498942 | 2,0287089 | 0,167695399 |
| 1398 | ENSG00000100938 | 0,086718108  | 4,948756652 | 0,715732  | 0,435973549 |
| 1399 | ENSG00000100941 | -0,04276906  | 5,763150828 | 0,1731837 | 0,681123305 |
| 1400 | ENSG00000100968 | -0,297314351 | 4,118644849 | 1,8223732 | 0,19010439  |
| 1401 | ENSG00000100979 | -1,049723388 | 6,196956185 | 14,061094 | 0,001038255 |
| 1402 | ENSG00000100983 | -0,004655517 | 4,420008827 | 0,0018518 | 0,966043732 |
| 1403 | ENSG00000100991 | 0,062717963  | 5,714312308 | 0,2594907 | 0,615282874 |
| 1404 | ENSG00000100994 | 0,326925551  | 7,259352912 | 1,9348316 | 0,177477903 |
| 1405 | ENSG00000100997 | 0,019941447  | 4,297666508 | 0,0258016 | 0,903501263 |
| 1406 | ENSG00000101000 | 0,718424211  | 4,576358713 | 1,9948056 | 0,171163136 |
| 1407 | ENSG00000101019 | -0,252105077 | 5,88021505  | 2,7810052 | 0,108882361 |
| 1408 | ENSG00000101040 | 0,229032481  | 5,248011913 | 1,8355454 | 0,188569725 |
| 1409 | ENSG00000101052 | 0,485729197  | 3,901112658 | 5,439613  | 0,02875278  |
| 1410 | ENSG00000101079 | -0,068069947 | 5,308105119 | 0,253578  | 0,619316223 |
| 1411 | ENSG00000101096 | 0,340555704  | 3,945418988 | 4,1644023 | 0,054368542 |
| 1412 | ENSG00000101109 | 0,229465514  | 4,98125265  | 1,9800725 | 0,172688728 |
| 1413 | ENSG00000101126 | 0,294001479  | 6,297713479 | 7,1608648 | 0,01343726  |
| 1414 | ENSG00000101132 | -0,392764731 | 4,255056064 | 2,5078108 | 0,126871818 |

|      |                 |              |             |           |             |
|------|-----------------|--------------|-------------|-----------|-------------|
| 1415 | ENSG00000101134 | 0,717404565  | 3,652386178 | 8,8229363 | 0,006827719 |
| 1416 | ENSG00000101138 | -0,114740434 | 4,451537471 | 1,0515116 | 0,454776693 |
| 1417 | ENSG00000101146 | -0,040288137 | 3,975455241 | 0,0926636 | 0,763532335 |
| 1418 | ENSG00000101150 | 0,2321069    | 5,939841037 | 3,9174107 | 0,059778378 |
| 1419 | ENSG00000101152 | -0,061310937 | 5,56727277  | 0,1279543 | 0,723808478 |
| 1420 | ENSG00000101158 | -0,090897361 | 4,936547992 | 0,365006  | 0,551623833 |
| 1421 | ENSG00000101160 | -0,139999345 | 6,63837501  | 1,10298   | 0,304433215 |
| 1422 | ENSG00000101161 | 0,296943897  | 5,595669653 | 3,1093645 | 0,091061123 |
| 1423 | ENSG00000101166 | -0,221014116 | 5,57464596  | 0,973251  | 0,334086353 |
| 1424 | ENSG00000101182 | -0,316139334 | 6,389622114 | 4,2433137 | 0,05083497  |
| 1425 | ENSG00000101191 | 0,140724417  | 5,662405774 | 0,9439734 | 0,341302749 |
| 1426 | ENSG00000101193 | 0,241900699  | 4,927736263 | 4,8964125 | 0,04883425  |
| 1427 | ENSG00000101210 | -0,038371682 | 8,141454856 | 0,0185309 | 0,892898646 |
| 1428 | ENSG00000101236 | 0,376159969  | 4,602200191 | 1,5465712 | 0,226108768 |
| 1429 | ENSG00000101246 | -0,131153018 | 4,407672282 | 0,4901678 | 0,490840219 |
| 1430 | ENSG00000101247 | -0,444659383 | 4,918173846 | 6,8213111 | 0,01555796  |
| 1431 | ENSG00000101265 | -0,182151568 | 4,829702271 | 0,3848934 | 0,54106549  |
| 1432 | ENSG00000101266 | -0,061622703 | 6,578111967 | 0,3528606 | 0,558248122 |
| 1433 | ENSG00000101290 | 0,04829406   | 7,107040435 | 0,0893975 | 0,767616448 |
| 1434 | ENSG00000101294 | -0,086200671 | 5,19498191  | 0,2274075 | 0,63793069  |
| 1435 | ENSG00000101310 | 0,081669201  | 4,447173802 | 0,1717901 | 0,682347338 |
| 1436 | ENSG00000101333 | -0,416294284 | 6,590189417 | 2,0923388 | 0,161465523 |
| 1437 | ENSG00000101335 | -0,246536536 | 9,506921048 | 0,8254464 | 0,372969174 |
| 1438 | ENSG00000101337 | 0,08334372   | 5,32575029  | 0,3078719 | 0,584319319 |
| 1439 | ENSG00000101343 | 0,014860139  | 5,321120378 | 0,0064927 | 0,93647173  |
| 1440 | ENSG00000101346 | 0,173132836  | 5,326714763 | 1,4606147 | 0,239028333 |
| 1441 | ENSG00000101347 | -0,703389602 | 6,784615916 | 5,8591924 | 0,023752982 |
| 1442 | ENSG00000101350 | 0,467119298  | 5,110491979 | 7,3593418 | 0,012380952 |
| 1443 | ENSG00000101361 | -0,166411133 | 5,390610861 | 1,5255832 | 0,22914252  |
| 1444 | ENSG00000101365 | -0,40964001  | 6,3082258   | 6,0717888 | 0,021595471 |
| 1445 | ENSG00000101367 | -0,199690387 | 6,345040098 | 1,7118666 | 0,20360576  |
| 1446 | ENSG00000101384 | -0,053260242 | 5,972581861 | 0,069089  | 0,794996651 |
| 1447 | ENSG00000101391 | -0,239220405 | 4,321824031 | 3,6997039 | 0,096079312 |
| 1448 | ENSG00000101400 | -0,400314105 | 6,660958578 | 2,5811318 | 0,121721393 |
| 1449 | ENSG00000101407 | -0,130738535 | 4,428757395 | 1,5828721 | 0,325110839 |
| 1450 | ENSG00000101413 | -0,240550406 | 5,90362807  | 2,8517964 | 0,104687102 |
| 1451 | ENSG00000101417 | 0,085169121  | 3,751657196 | 0,2448807 | 0,693296474 |
| 1452 | ENSG00000101421 | -0,177506652 | 5,783820484 | 1,4015912 | 0,248473603 |
| 1453 | ENSG00000101439 | -0,209631257 | 7,847429895 | 1,0326759 | 0,320051283 |
| 1454 | ENSG00000101444 | 0,03229941   | 5,013271458 | 0,0588478 | 0,906391238 |
| 1455 | ENSG00000101445 | 0,47616256   | 4,079957624 | 5,7471888 | 0,024985414 |
| 1456 | ENSG00000101452 | 0,007085989  | 4,377702492 | 0,0017236 | 0,967241267 |
| 1457 | ENSG00000101463 | -0,021378677 | 4,519801042 | 0,0135122 | 0,90846498  |
| 1458 | ENSG00000101474 | 0,268787592  | 5,557018595 | 1,8150058 | 0,190969449 |
| 1459 | ENSG00000101493 | 0,165204363  | 4,175636817 | 1,037638  | 0,364802661 |
| 1460 | ENSG00000101544 | 0,214350029  | 4,652807967 | 2,4066219 | 0,134366331 |
| 1461 | ENSG00000101557 | -0,003156974 | 5,913174748 | 0,0009714 | 0,975402529 |
| 1462 | ENSG00000101558 | -0,067099347 | 7,393170918 | 0,2523608 | 0,620153836 |
| 1463 | ENSG00000101574 | 0,032135207  | 3,820982268 | 0,0534472 | 0,828292028 |
| 1464 | ENSG00000101577 | 0,15381123   | 4,762521645 | 0,6132268 | 0,441526058 |
| 1465 | ENSG00000101596 | -0,013691735 | 7,04732372  | 0,0065741 | 0,936075823 |
| 1466 | ENSG00000101605 | 0,149614791  | 9,53138989  | 0,1813808 | 0,674129079 |
| 1467 | ENSG00000101608 | 0,056126123  | 9,784166721 | 0,0191804 | 0,891050017 |
| 1468 | ENSG00000101639 | -0,087643157 | 6,666181627 | 0,2096495 | 0,651317794 |
| 1469 | ENSG00000101654 | 0,088042319  | 6,026365564 | 0,419511  | 0,523541217 |
| 1470 | ENSG00000101665 | 0,960324272  | 4,84554959  | 13,802791 | 0,001130823 |
| 1471 | ENSG00000101745 | 0,038208632  | 6,918447294 | 0,0560912 | 0,81487064  |
| 1472 | ENSG00000101751 | 0,164901074  | 5,313666665 | 1,3621114 | 0,255046486 |
| 1473 | ENSG00000101752 | 0,157801388  | 6,598273218 | 0,7472079 | 0,39624452  |

|      |                 |              |             |           |             |
|------|-----------------|--------------|-------------|-----------|-------------|
| 1474 | ENSG00000101773 | 0,057094118  | 4,069895832 | 0,0637757 | 0,80285725  |
| 1475 | ENSG00000101782 | 0,144664635  | 6,230314506 | 0,5749882 | 0,455946551 |
| 1476 | ENSG00000101825 | 1,307715161  | 5,215093695 | 7,9459193 | 0,009710799 |
| 1477 | ENSG00000101843 | -0,017296395 | 4,395972205 | 0,0055311 | 0,94135479  |
| 1478 | ENSG00000101844 | -0,524106523 | 4,453004121 | 5,3577728 | 0,029859204 |
| 1479 | ENSG00000101846 | 0,263355505  | 4,501156837 | 3,2510254 | 0,084405866 |
| 1480 | ENSG00000101849 | 0,1534759    | 4,191020315 | 0,5172593 | 0,479222388 |
| 1481 | ENSG00000101856 | 0,133290567  | 5,39330075  | 0,278939  | 0,602432053 |
| 1482 | ENSG00000101868 | 0,017601713  | 4,782082508 | 0,0395551 | 0,844086131 |
| 1483 | ENSG00000101871 | 0,39558097   | 5,030657457 | 2,6870859 | 0,114706722 |
| 1484 | ENSG00000101882 | 0,02402423   | 3,823282291 | 0,0420907 | 0,873857875 |
| 1485 | ENSG00000101892 | 0,58514635   | 4,212266983 | 1,4173477 | 0,245924811 |
| 1486 | ENSG00000101901 | 0,158947818  | 5,317470302 | 1,2471597 | 0,275550542 |
| 1487 | ENSG00000101928 | -0,17017041  | 4,284006064 | 0,4661277 | 0,501560411 |
| 1488 | ENSG00000101935 | 0,250923599  | 3,568875848 | 2,0054505 | 0,188621415 |
| 1489 | ENSG00000101938 | 0,75394214   | 5,72985665  | 2,9401616 | 0,099781881 |
| 1490 | ENSG00000101940 | -0,019178421 | 5,694163309 | 0,0112972 | 0,916270878 |
| 1491 | ENSG00000101955 | -0,43211333  | 5,60629244  | 5,7287581 | 0,025194964 |
| 1492 | ENSG00000101966 | 0,060913713  | 5,962029294 | 0,3367197 | 0,567324154 |
| 1493 | ENSG00000101972 | -0,026538067 | 6,955819089 | 0,0173268 | 0,896414914 |
| 1494 | ENSG00000101974 | 0,009645358  | 4,966229707 | 0,0015402 | 0,96903206  |
| 1495 | ENSG00000102007 | -0,176621746 | 4,419803124 | 1,0790587 | 0,309653867 |
| 1496 | ENSG00000102024 | 0,288255363  | 6,92591022  | 1,5239527 | 0,229426613 |
| 1497 | ENSG00000102038 | -0,353179426 | 6,357359075 | 5,9682356 | 0,022601099 |
| 1498 | ENSG00000102054 | -0,034533313 | 6,321128272 | 0,1304011 | 0,72128493  |
| 1499 | ENSG00000102081 | 0,26351195   | 5,733156339 | 3,3299459 | 0,080957145 |
| 1500 | ENSG00000102125 | -0,263955142 | 4,529795016 | 2,2608737 | 0,14622158  |
| 1501 | ENSG00000102144 | -0,381876394 | 8,550579212 | 5,0122432 | 0,03504986  |
| 1502 | ENSG00000102158 | -0,111297836 | 6,628537268 | 0,4487858 | 0,509550326 |
| 1503 | ENSG00000102172 | 0,188231644  | 5,459210245 | 1,5543842 | 0,224976809 |
| 1504 | ENSG00000102178 | -0,186286536 | 5,244530377 | 1,3229973 | 0,261817036 |
| 1505 | ENSG00000102181 | -0,029040427 | 6,019885267 | 0,0317926 | 0,860037129 |
| 1506 | ENSG00000102189 | 0,158379209  | 6,537339659 | 1,0985672 | 0,305402788 |
| 1507 | ENSG00000102218 | 0,186621808  | 3,705239364 | 0,7464273 | 0,396487481 |
| 1508 | ENSG00000102225 | -0,230265274 | 5,809775472 | 1,8822324 | 0,183251429 |
| 1509 | ENSG00000102226 | 0,591412704  | 5,450332629 | 9,4165622 | 0,005416588 |
| 1510 | ENSG00000102241 | 0,060649544  | 6,432527981 | 0,2374432 | 0,630632686 |
| 1511 | ENSG00000102265 | 0,983027782  | 7,192421151 | 3,7304472 | 0,065781745 |
| 1512 | ENSG00000102287 | -0,004169363 | 4,784170505 | 0,0001377 | 0,99073848  |
| 1513 | ENSG00000102309 | -0,267530285 | 3,939385038 | 3,616141  | 0,147734948 |
| 1514 | ENSG00000102316 | 0,223331449  | 6,773651136 | 1,9748979 | 0,173228474 |
| 1515 | ENSG00000102317 | -0,178749195 | 6,94078167  | 1,2727707 | 0,270822644 |
| 1516 | ENSG00000102349 | 0,013119596  | 4,023689005 | 0,0039008 | 0,950736302 |
| 1517 | ENSG00000102359 | -0,819303774 | 4,826289515 | 4,5299819 | 0,04418393  |
| 1518 | ENSG00000102393 | -0,437101991 | 3,639743537 | 7,6066501 | 0,026579292 |
| 1519 | ENSG00000102401 | 0,287743835  | 6,326341337 | 4,7987706 | 0,038786963 |
| 1520 | ENSG00000102409 | 0,070288628  | 5,536664117 | 0,1999546 | 0,658919922 |
| 1521 | ENSG00000102452 | -0,316233671 | 4,690254533 | 1,7757374 | 0,195662955 |
| 1522 | ENSG00000102471 | -0,006828376 | 5,287889883 | 0,0014761 | 0,969683009 |
| 1523 | ENSG00000102531 | 0,239387164  | 6,685838032 | 1,4227394 | 0,245054675 |
| 1524 | ENSG00000102547 | -0,232143774 | 5,194064336 | 1,5216816 | 0,22976316  |
| 1525 | ENSG00000102572 | 0,033483064  | 4,861268592 | 0,0335418 | 0,856282033 |
| 1526 | ENSG00000102580 | -0,103931839 | 6,741780991 | 0,3939255 | 0,536395415 |
| 1527 | ENSG00000102595 | -0,169997744 | 5,848500185 | 1,0128045 | 0,324652331 |
| 1528 | ENSG00000102606 | -0,119847651 | 5,888773937 | 0,6858405 | 0,416037035 |
| 1529 | ENSG00000102678 | 0,615088686  | 3,661142041 | 7,7986249 | 0,010315664 |
| 1530 | ENSG00000102683 | -0,166691498 | 6,437850553 | 0,2932639 | 0,593318888 |
| 1531 | ENSG00000102699 | 0,173033895  | 5,942714186 | 2,1641165 | 0,15470389  |
| 1532 | ENSG00000102710 | 0,045250927  | 5,323921138 | 0,1651524 | 0,688181804 |

|      |                 |              |             |           |             |
|------|-----------------|--------------|-------------|-----------|-------------|
| 1533 | ENSG00000102738 | -0,398114219 | 4,625309711 | 5,1163152 | 0,033411037 |
| 1534 | ENSG00000102753 | -0,220943604 | 6,301623812 | 1,5908274 | 0,219790284 |
| 1535 | ENSG00000102755 | -0,397181767 | 7,113339198 | 2,7694303 | 0,109581159 |
| 1536 | ENSG00000102760 | -0,017736791 | 4,534344872 | 0,0059603 | 0,939126405 |
| 1537 | ENSG00000102763 | 0,02281289   | 6,535462646 | 0,0171026 | 0,897083496 |
| 1538 | ENSG00000102780 | 0,186556835  | 5,596812726 | 0,7801924 | 0,386177693 |
| 1539 | ENSG00000102781 | -0,055553192 | 6,256984014 | 0,132711  | 0,718949279 |
| 1540 | ENSG00000102786 | 0,067552714  | 5,991278173 | 0,1138935 | 0,738800031 |
| 1541 | ENSG00000102802 | 0,028271477  | 5,146712351 | 0,0032554 | 0,954990766 |
| 1542 | ENSG00000102804 | -0,215744444 | 7,337298101 | 2,8055694 | 0,107369635 |
| 1543 | ENSG00000102805 | -0,116015279 | 4,707153066 | 0,6187389 | 0,439507532 |
| 1544 | ENSG00000102870 | -0,042442164 | 4,91796932  | 0,0394663 | 0,844264847 |
| 1545 | ENSG00000102882 | 0,139999967  | 4,732649814 | 0,6365359 | 0,433089045 |
| 1546 | ENSG00000102893 | 0,044756087  | 6,737614987 | 0,1423028 | 0,709431972 |
| 1547 | ENSG00000102897 | -0,315237642 | 4,746816081 | 2,488463  | 0,128273511 |
| 1548 | ENSG00000102898 | -0,038555109 | 5,058821795 | 0,1017717 | 0,752569075 |
| 1549 | ENSG00000102900 | -0,291203737 | 4,529807798 | 6,3094626 | 0,024797112 |
| 1550 | ENSG00000102908 | 0,097943447  | 6,602807225 | 0,3154527 | 0,579759333 |
| 1551 | ENSG00000102910 | 0,018418927  | 6,870069493 | 0,028425  | 0,867575237 |
| 1552 | ENSG00000102921 | 0,079341006  | 5,000928949 | 0,536649  | 0,575054308 |
| 1553 | ENSG00000102967 | 0,240912577  | 4,175172215 | 2,389271  | 0,168965163 |
| 1554 | ENSG00000102974 | 0,151492192  | 5,017313029 | 1,5795996 | 0,246383025 |
| 1555 | ENSG00000102978 | 0,100366225  | 5,303980382 | 0,9245868 | 0,373324268 |
| 1556 | ENSG00000102996 | -0,438676286 | 5,121018345 | 1,8622185 | 0,185508462 |
| 1557 | ENSG00000103018 | -0,21616707  | 5,447829045 | 2,7047643 | 0,113536005 |
| 1558 | ENSG00000103034 | -0,231405665 | 7,239786322 | 0,576327  | 0,455428878 |
| 1559 | ENSG00000103035 | -0,524174014 | 5,602075453 | 9,9817037 | 0,004366129 |
| 1560 | ENSG00000103042 | -0,003019768 | 4,04409901  | 0,0002518 | 0,987476143 |
| 1561 | ENSG00000103047 | 0,117446415  | 4,002233208 | 0,7123069 | 0,548402916 |
| 1562 | ENSG00000103051 | -0,110241054 | 5,378297399 | 0,7369842 | 0,399413789 |
| 1563 | ENSG00000103064 | -0,260921271 | 4,480614689 | 1,0938273 | 0,306439905 |
| 1564 | ENSG00000103066 | 0,431733347  | 4,17484958  | 3,6893204 | 0,067182067 |
| 1565 | ENSG00000103091 | 0,000285992  | 5,013651964 | 9,668E-07 | 0,999223926 |
| 1566 | ENSG00000103111 | 0,030219009  | 4,129295321 | 0,0326366 | 0,933269792 |
| 1567 | ENSG00000103121 | -0,710109385 | 5,288824342 | 12,097419 | 0,002023    |
| 1568 | ENSG00000103150 | 0,139134307  | 6,469202638 | 0,239074  | 0,62948342  |
| 1569 | ENSG00000103160 | -0,587998714 | 4,981343026 | 15,512351 | 0,000650414 |
| 1570 | ENSG00000103194 | -0,180113297 | 5,400722783 | 2,471587  | 0,129463945 |
| 1571 | ENSG00000103196 | -2,01932224  | 6,492132344 | 40,378824 | 1,70793E-06 |
| 1572 | ENSG00000103197 | 0,316117253  | 5,004934989 | 2,1052548 | 0,160231686 |
| 1573 | ENSG00000103222 | 0,263145229  | 4,626560272 | 1,2503246 | 0,274978359 |
| 1574 | ENSG00000103226 | 0,191092597  | 7,646713892 | 0,6183288 | 0,439657219 |
| 1575 | ENSG00000103264 | 0,109831283  | 4,94073609  | 0,3794055 | 0,543940526 |
| 1576 | ENSG00000103275 | -0,053614295 | 4,798239977 | 0,1388891 | 0,712775505 |
| 1577 | ENSG00000103316 | 0,744433625  | 5,654538145 | 3,4501697 | 0,076032683 |
| 1578 | ENSG00000103319 | -0,070316061 | 5,553661949 | 0,0882986 | 0,769005647 |
| 1579 | ENSG00000103335 | -0,00329091  | 4,394545542 | 0,0001275 | 0,991087828 |
| 1580 | ENSG00000103342 | -0,098791089 | 6,770903499 | 1,1454947 | 0,295506095 |
| 1581 | ENSG00000103351 | 0,293904517  | 4,313228182 | 5,2053997 | 0,045583556 |
| 1582 | ENSG00000103353 | -0,049364262 | 5,911818739 | 0,1049485 | 0,748883536 |
| 1583 | ENSG00000103356 | 0,009357452  | 4,741641321 | 0,0030561 | 0,956388959 |
| 1584 | ENSG00000103363 | -0,112889424 | 5,811074733 | 0,1839802 | 0,671946221 |
| 1585 | ENSG00000103365 | -0,004923422 | 5,723492758 | 0,0010165 | 0,974839237 |
| 1586 | ENSG00000103381 | 0,285100102  | 4,259898926 | 3,954612  | 0,060431985 |
| 1587 | ENSG00000103404 | -0,151991691 | 5,609943105 | 1,0095187 | 0,325421875 |
| 1588 | ENSG00000103415 | -0,612441935 | 5,218603223 | 15,401116 | 0,000673677 |
| 1589 | ENSG00000103423 | -0,155487576 | 5,197884955 | 0,8812975 | 0,357554235 |
| 1590 | ENSG00000103429 | 0,036624664  | 5,006046797 | 0,1087656 | 0,74451393  |
| 1591 | ENSG00000103479 | 0,163087667  | 6,224016105 | 2,3306244 | 0,140373528 |

|      |                 |              |             |           |             |
|------|-----------------|--------------|-------------|-----------|-------------|
| 1592 | ENSG00000103485 | -0,308563531 | 4,245098766 | 2,5704725 | 0,122454629 |
| 1593 | ENSG00000103489 | -0,27507128  | 4,357890094 | 1,4117862 | 0,246826498 |
| 1594 | ENSG00000103496 | -0,151771171 | 4,512941735 | 0,6582327 | 0,425461083 |
| 1595 | ENSG00000103502 | -0,023842901 | 5,378824257 | 0,0214907 | 0,884721368 |
| 1596 | ENSG00000103507 | -0,270309082 | 4,663897698 | 2,6768591 | 0,115362704 |
| 1597 | ENSG00000103510 | -0,050678183 | 4,978404514 | 0,1237381 | 0,728197391 |
| 1598 | ENSG00000103512 | 0,104439966  | 7,655967888 | 0,2288442 | 0,636876161 |
| 1599 | ENSG00000103540 | 0,193638776  | 4,66975849  | 1,5148046 | 0,230786034 |
| 1600 | ENSG00000103544 | 0,132477885  | 5,45771702  | 1,6494579 | 0,265043701 |
| 1601 | ENSG00000103549 | 0,279772244  | 4,254485987 | 1,7766786 | 0,195548811 |
| 1602 | ENSG00000103569 | 0,685843732  | 4,338326985 | 2,0157541 | 0,16902202  |
| 1603 | ENSG00000103591 | -0,043534681 | 4,881353335 | 0,11255   | 0,80286785  |
| 1604 | ENSG00000103642 | -0,320658868 | 4,400807698 | 4,406718  | 0,046916826 |
| 1605 | ENSG00000103657 | 0,01769466   | 8,036064475 | 0,01429   | 0,905876416 |
| 1606 | ENSG00000103671 | -0,077006016 | 4,224806899 | 0,2031121 | 0,656419953 |
| 1607 | ENSG00000103707 | -0,108752691 | 3,923918635 | 0,7437012 | 0,520142929 |
| 1608 | ENSG00000103710 | -0,709647688 | 5,161540132 | 9,8550136 | 0,004580511 |
| 1609 | ENSG00000103769 | -0,35205626  | 6,702178563 | 6,9477185 | 0,014713093 |
| 1610 | ENSG00000103811 | -0,206898554 | 5,373525782 | 1,7690583 | 0,196475383 |
| 1611 | ENSG00000103852 | -0,181104889 | 4,491704491 | 2,4667359 | 0,18300635  |
| 1612 | ENSG00000103855 | -0,191118961 | 4,685116511 | 0,7374172 | 0,399307999 |
| 1613 | ENSG00000103876 | 0,270210002  | 4,269560005 | 0,6734319 | 0,420241246 |
| 1614 | ENSG00000103942 | -0,102586487 | 4,468853448 | 0,3201586 | 0,576965026 |
| 1615 | ENSG00000103966 | 0,044260331  | 5,279835813 | 0,0606437 | 0,807655296 |
| 1616 | ENSG00000103978 | 0,060040829  | 5,621042434 | 0,1638127 | 0,689391622 |
| 1617 | ENSG00000103994 | -0,00900814  | 10,2957247  | 0,0007653 | 0,978167558 |
| 1618 | ENSG00000103995 | -0,191779865 | 3,535737214 | 1,1148808 | 0,352621942 |
| 1619 | ENSG00000104043 | -0,294237006 | 4,404186471 | 1,0526717 | 0,315511319 |
| 1620 | ENSG00000104047 | -0,035854846 | 5,249191537 | 0,0777454 | 0,782847349 |
| 1621 | ENSG00000104064 | -0,010328812 | 3,971146838 | 0,0044712 | 0,978662092 |
| 1622 | ENSG00000104067 | 0,221519409  | 7,718667243 | 3,555031  | 0,071952779 |
| 1623 | ENSG00000104093 | -0,039059878 | 5,919350693 | 0,0587176 | 0,810671731 |
| 1624 | ENSG00000104131 | -0,129741399 | 5,696700137 | 0,7984182 | 0,380759085 |
| 1625 | ENSG00000104133 | 0,059177482  | 6,787282961 | 0,3579087 | 0,555467642 |
| 1626 | ENSG00000104142 | 0,145535059  | 4,094173766 | 0,5703473 | 0,45774835  |
| 1627 | ENSG00000104154 | 0,239331194  | 4,054601642 | 2,2556106 | 0,146670802 |
| 1628 | ENSG00000104164 | -0,099962837 | 5,813493989 | 0,3789989 | 0,544154707 |
| 1629 | ENSG00000104177 | 0,131754526  | 4,277669905 | 0,550659  | 0,46552328  |
| 1630 | ENSG00000104205 | 0,09502581   | 4,65187147  | 0,7060313 | 0,483419202 |
| 1631 | ENSG00000104213 | -0,668109632 | 3,812011298 | 9,8732223 | 0,004549    |
| 1632 | ENSG00000104218 | 0,052462092  | 4,884344029 | 0,1457858 | 0,706074292 |
| 1633 | ENSG00000104219 | -0,096701863 | 5,944271909 | 0,2515157 | 0,620753443 |
| 1634 | ENSG00000104231 | -0,119892099 | 5,08661569  | 0,4198824 | 0,523381245 |
| 1635 | ENSG00000104290 | -0,01047656  | 3,924648432 | 0,0062136 | 0,976878368 |
| 1636 | ENSG00000104299 | -0,173746427 | 3,801546815 | 1,6606459 | 0,311125705 |
| 1637 | ENSG00000104320 | 0,122683588  | 5,692137804 | 0,8054994 | 0,378678492 |
| 1638 | ENSG00000104324 | 0,081708189  | 5,667002687 | 0,4075893 | 0,529449643 |
| 1639 | ENSG00000104325 | -0,530161478 | 7,254404239 | 7,8406343 | 0,010139021 |
| 1640 | ENSG00000104331 | -0,026251514 | 6,998588509 | 0,0456831 | 0,832620601 |
| 1641 | ENSG00000104332 | -0,408408318 | 8,518212935 | 2,1282702 | 0,158061135 |
| 1642 | ENSG00000104341 | -0,015284649 | 8,04815505  | 0,0043826 | 0,947787176 |
| 1643 | ENSG00000104343 | -0,061474049 | 5,821539404 | 0,058262  | 0,81139287  |
| 1644 | ENSG00000104361 | 0,276783907  | 4,544067567 | 2,5840826 | 0,121519328 |
| 1645 | ENSG00000104365 | -0,044300194 | 4,983114855 | 0,0622341 | 0,805202793 |
| 1646 | ENSG00000104368 | -0,339498116 | 4,679004438 | 1,7185888 | 0,202751209 |
| 1647 | ENSG00000104369 | -0,241043291 | 3,630211721 | 1,1910508 | 0,286364249 |
| 1648 | ENSG00000104375 | -0,04066192  | 5,006436633 | 0,0799716 | 0,779850259 |
| 1649 | ENSG00000104388 | 0,003560636  | 6,848261737 | 0,0004567 | 0,98313295  |
| 1650 | ENSG00000104408 | 0,009690253  | 7,883591629 | 0,0011402 | 0,973352953 |

|      |                 |              |             |           |             |
|------|-----------------|--------------|-------------|-----------|-------------|
| 1651 | ENSG00000104412 | -0,331605295 | 5,924246499 | 2,1820388 | 0,153126638 |
| 1652 | ENSG00000104419 | -0,123674973 | 7,004477567 | 0,358953  | 0,554915957 |
| 1653 | ENSG00000104427 | -0,073053898 | 3,975564164 | 0,1441499 | 0,707656033 |
| 1654 | ENSG00000104442 | -0,182512175 | 5,227179374 | 1,4444901 | 0,241584273 |
| 1655 | ENSG00000104447 | 0,295745414  | 5,811916114 | 1,5473008 | 0,22600275  |
| 1656 | ENSG00000104472 | -0,171100594 | 3,690259326 | 1,4093473 | 0,366493485 |
| 1657 | ENSG00000104490 | -0,594375346 | 4,578651839 | 8,5585098 | 0,007582749 |
| 1658 | ENSG00000104497 | -0,089994125 | 4,263372749 | 0,1330607 | 0,71859589  |
| 1659 | ENSG00000104517 | 0,017109518  | 7,323886107 | 0,0304436 | 0,863001472 |
| 1660 | ENSG00000104529 | 0,018173776  | 5,74645693  | 0,0088713 | 0,92577194  |
| 1661 | ENSG00000104613 | -0,041566826 | 5,500818429 | 0,097471  | 0,75767538  |
| 1662 | ENSG00000104626 | 0,015989339  | 3,843177709 | 0,0079076 | 0,929907679 |
| 1663 | ENSG00000104635 | -0,629162082 | 7,044913148 | 8,5323012 | 0,007662453 |
| 1664 | ENSG00000104643 | -0,347289493 | 5,433429479 | 5,9701133 | 0,0225821   |
| 1665 | ENSG00000104660 | 0,102811936  | 5,692073385 | 0,4652798 | 0,501945953 |
| 1666 | ENSG00000104671 | -0,418251353 | 4,920918017 | 2,3174035 | 0,141498722 |
| 1667 | ENSG00000104679 | -0,102568818 | 4,225475677 | 0,4214835 | 0,522597434 |
| 1668 | ENSG00000104687 | -0,001407153 | 5,596208482 | 0,0001007 | 0,992080844 |
| 1669 | ENSG00000104695 | 0,026815666  | 6,18147547  | 0,0759874 | 0,785251662 |
| 1670 | ENSG00000104723 | -0,290551146 | 5,259275648 | 2,9349221 | 0,100067017 |
| 1671 | ENSG00000104738 | -0,2875748   | 4,567884235 | 2,9021733 | 0,101870837 |
| 1672 | ENSG00000104756 | -0,462885349 | 6,090293783 | 7,6152355 | 0,011127601 |
| 1673 | ENSG00000104763 | -0,145654097 | 9,59801761  | 0,2950656 | 0,592193278 |
| 1674 | ENSG00000104765 | 0,43154688   | 7,084661842 | 2,916048  | 0,101102032 |
| 1675 | ENSG00000104774 | 0,127129892  | 4,065713958 | 0,2933998 | 0,593233786 |
| 1676 | ENSG00000104805 | -0,030729389 | 6,855551172 | 0,0220728 | 0,88318216  |
| 1677 | ENSG00000104812 | -0,110260036 | 6,092838608 | 0,2170307 | 0,645672145 |
| 1678 | ENSG00000104823 | -0,206212097 | 6,279354155 | 0,6201048 | 0,439009607 |
| 1679 | ENSG00000104824 | 0,062801275  | 5,934757463 | 0,18295   | 0,672803561 |
| 1680 | ENSG00000104852 | 0,19819186   | 6,618428339 | 1,3717809 | 0,253439595 |
| 1681 | ENSG00000104853 | -0,206577991 | 5,369473666 | 1,5553281 | 0,224840532 |
| 1682 | ENSG00000104870 | 0,170700439  | 5,810861984 | 0,5572718 | 0,462887885 |
| 1683 | ENSG00000104872 | -0,006311416 | 4,226492463 | 0,0012926 | 0,971628533 |
| 1684 | ENSG00000104879 | -0,587985362 | 10,61725694 | 4,3387252 | 0,048505624 |
| 1685 | ENSG00000104881 | -0,203216379 | 5,068279638 | 1,4074224 | 0,247536991 |
| 1686 | ENSG00000104904 | -0,201179628 | 7,731989998 | 1,1274248 | 0,299294647 |
| 1687 | ENSG00000104936 | -0,154324708 | 6,472364497 | 0,4867082 | 0,492358443 |
| 1688 | ENSG00000104964 | -0,276007277 | 7,365889526 | 2,2844575 | 0,144228716 |
| 1689 | ENSG00000104969 | -0,090033369 | 5,369765418 | 0,1151966 | 0,737368352 |
| 1690 | ENSG00000104979 | -0,189449252 | 4,945347263 | 1,4419084 | 0,241992887 |
| 1691 | ENSG00000104980 | -0,335705778 | 4,610653233 | 4,540864  | 0,043951414 |
| 1692 | ENSG00000105053 | 0,037479808  | 3,893336455 | 0,0533504 | 0,904834439 |
| 1693 | ENSG00000105058 | -0,074171395 | 4,937436452 | 0,2357087 | 0,631893358 |
| 1694 | ENSG00000105127 | -0,117464695 | 4,338979865 | 0,6446849 | 0,430182426 |
| 1695 | ENSG00000105135 | -0,161818671 | 5,699873883 | 0,6910263 | 0,414321242 |
| 1696 | ENSG00000105136 | 0,03653698   | 3,671627256 | 0,0841292 | 0,878439725 |
| 1697 | ENSG00000105171 | -0,257078244 | 4,369724872 | 2,9307818 | 0,103345091 |
| 1698 | ENSG00000105176 | -0,055294239 | 5,851044577 | 0,2364082 | 0,631374794 |
| 1699 | ENSG00000105185 | -0,540516281 | 5,490372318 | 8,2242918 | 0,008671635 |
| 1700 | ENSG00000105186 | -0,154060887 | 4,847884741 | 2,1598446 | 0,194506609 |
| 1701 | ENSG00000105193 | 0,120846352  | 7,205094036 | 0,2918408 | 0,594211153 |
| 1702 | ENSG00000105197 | -0,225650763 | 4,852203517 | 1,5597818 | 0,224198974 |
| 1703 | ENSG00000105202 | 0,155468197  | 4,719878213 | 0,4974317 | 0,48767848  |
| 1704 | ENSG00000105220 | -0,136876942 | 7,717127282 | 0,5542318 | 0,464096362 |
| 1705 | ENSG00000105221 | 0,128303797  | 5,868725235 | 0,4699929 | 0,4998095   |
| 1706 | ENSG00000105223 | 0,106080796  | 6,150555754 | 0,2961136 | 0,591540615 |
| 1707 | ENSG00000105254 | -0,075117497 | 4,775731367 | 0,4008521 | 0,53854509  |
| 1708 | ENSG00000105281 | -0,122673937 | 3,785003204 | 0,1236619 | 0,728282077 |
| 1709 | ENSG00000105323 | 0,152900833  | 6,041562595 | 0,5342913 | 0,472153925 |

|      |                 |              |             |           |             |
|------|-----------------|--------------|-------------|-----------|-------------|
| 1710 | ENSG00000105339 | -0,30091488  | 4,923608128 | 1,6933611 | 0,205981466 |
| 1711 | ENSG00000105341 | -0,300807224 | 5,068148338 | 3,2795266 | 0,083167669 |
| 1712 | ENSG00000105357 | 0,154097762  | 5,127811922 | 0,5014629 | 0,485938827 |
| 1713 | ENSG00000105372 | 0,268629526  | 7,335263222 | 1,2424478 | 0,276456554 |
| 1714 | ENSG00000105373 | 0,301652566  | 6,395472074 | 2,2540139 | 0,146807407 |
| 1715 | ENSG00000105379 | -0,211778834 | 5,093313846 | 0,639742  | 0,431948472 |
| 1716 | ENSG00000105397 | 0,04915962   | 4,641700337 | 0,1091349 | 0,870634181 |
| 1717 | ENSG00000105401 | -0,213058303 | 6,451007214 | 1,8254586 | 0,189743545 |
| 1718 | ENSG00000105402 | -0,11898338  | 4,73639671  | 0,4136146 | 0,526470294 |
| 1719 | ENSG00000105426 | 0,457172191  | 5,658563582 | 0,9856807 | 0,331081197 |
| 1720 | ENSG00000105429 | 0,19096806   | 5,149032217 | 0,6632462 | 0,423728222 |
| 1721 | ENSG00000105438 | 0,126126224  | 5,137452592 | 0,5434907 | 0,46840809  |
| 1722 | ENSG00000105443 | 0,261013937  | 4,241152243 | 3,2136634 | 0,11265791  |
| 1723 | ENSG00000105483 | -0,008420457 | 5,392981603 | 0,0036534 | 0,952320956 |
| 1724 | ENSG00000105497 | 0,140150406  | 4,03571694  | 1,5027152 | 0,395788017 |
| 1725 | ENSG00000105499 | 0,298722211  | 4,598216458 | 2,7575995 | 0,110300828 |
| 1726 | ENSG00000105552 | 0,032281038  | 4,208300047 | 0,0259063 | 0,873527954 |
| 1727 | ENSG00000105568 | 0,132111438  | 7,374784039 | 0,4145411 | 0,52601157  |
| 1728 | ENSG00000105576 | 0,354583808  | 5,289595968 | 2,7915821 | 0,108248366 |
| 1729 | ENSG00000105609 | -1,008349361 | 3,899573669 | 15,131783 | 0,000733858 |
| 1730 | ENSG00000105640 | 0,258095294  | 7,283178889 | 1,352042  | 0,25678685  |
| 1731 | ENSG00000105677 | -0,402804143 | 4,865738755 | 5,0705762 | 0,034135833 |
| 1732 | ENSG00000105698 | 0,119300534  | 5,964837708 | 0,7072513 | 0,408949921 |
| 1733 | ENSG00000105700 | -0,069409406 | 4,10292226  | 0,2207077 | 0,655623052 |
| 1734 | ENSG00000105701 | 0,120709799  | 6,193120567 | 0,3296684 | 0,571400578 |
| 1735 | ENSG00000105708 | 0,13114289   | 3,827323276 | 0,5437472 | 0,468304387 |
| 1736 | ENSG00000105711 | 0,120218004  | 5,315539313 | 0,7787598 | 0,38657556  |
| 1737 | ENSG00000105778 | -0,023877131 | 5,430738387 | 0,0344    | 0,854470997 |
| 1738 | ENSG00000105792 | 0,320147626  | 3,930101229 | 1,1681774 | 0,29092514  |
| 1739 | ENSG00000105793 | -0,089277509 | 4,711205421 | 0,3986538 | 0,580388565 |
| 1740 | ENSG00000105808 | 0,414903291  | 4,00798113  | 1,9422048 | 0,176686449 |
| 1741 | ENSG00000105810 | 0,346520623  | 5,818324194 | 1,8936421 | 0,181979768 |
| 1742 | ENSG00000105819 | -0,099197071 | 5,96338526  | 0,8977888 | 0,353143533 |
| 1743 | ENSG00000105821 | -0,162547056 | 4,497856622 | 1,8698725 | 0,263071293 |
| 1744 | ENSG00000105829 | -0,05080315  | 4,039137867 | 0,0686184 | 0,795679606 |
| 1745 | ENSG00000105835 | -0,485792237 | 8,259782852 | 1,646784  | 0,212115599 |
| 1746 | ENSG00000105849 | -0,190403384 | 4,619564346 | 0,7653352 | 0,39066447  |
| 1747 | ENSG00000105851 | 0,310248072  | 3,591659527 | 1,9101386 | 0,180160197 |
| 1748 | ENSG00000105854 | -0,321197318 | 5,543877661 | 5,4837842 | 0,028147432 |
| 1749 | ENSG00000105855 | 1,469166312  | 5,546255578 | 3,7464291 | 0,065246583 |
| 1750 | ENSG00000105856 | 0,085171085  | 6,290960019 | 0,2588789 | 0,615714202 |
| 1751 | ENSG00000105866 | -0,046036804 | 4,655646023 | 0,1438325 | 0,764855812 |
| 1752 | ENSG00000105877 | 0,038844308  | 3,641804654 | 0,0274201 | 0,869919437 |
| 1753 | ENSG00000105879 | -0,094085359 | 4,514540709 | 0,8969483 | 0,535741013 |
| 1754 | ENSG00000105887 | 0,082479382  | 6,986666257 | 0,3490742 | 0,560351546 |
| 1755 | ENSG00000105894 | 0,44830427   | 5,796126838 | 4,5537918 | 0,043676976 |
| 1756 | ENSG00000105926 | 0,51712182   | 4,794158328 | 1,8119998 | 0,191323801 |
| 1757 | ENSG00000105939 | 0,487658598  | 5,183963295 | 5,3188858 | 0,030401541 |
| 1758 | ENSG00000105953 | -0,220183595 | 7,805842338 | 0,7889067 | 0,383581377 |
| 1759 | ENSG00000105968 | -0,144113758 | 7,091855791 | 1,8287512 | 0,189314172 |
| 1760 | ENSG00000105971 | -0,145236344 | 7,224214309 | 0,5207423 | 0,477762533 |
| 1761 | ENSG00000105974 | -0,410102688 | 8,629712407 | 2,1865925 | 0,152717296 |
| 1762 | ENSG00000105976 | 0,650207112  | 5,652948455 | 2,2703138 | 0,145419957 |
| 1763 | ENSG00000105983 | -0,261827518 | 5,716067804 | 5,6466061 | 0,026121075 |
| 1764 | ENSG00000105993 | 0,024787853  | 7,087165246 | 0,0293877 | 0,865374244 |
| 1765 | ENSG00000106012 | 0,105601859  | 3,775708453 | 0,3065474 | 0,619466608 |
| 1766 | ENSG00000106025 | -0,323855499 | 5,549990717 | 1,3459735 | 0,257827411 |
| 1767 | ENSG00000106028 | -0,51303341  | 5,789138654 | 8,3340641 | 0,008296085 |
| 1768 | ENSG00000106034 | 0,579796125  | 6,265744584 | 6,6446439 | 0,016790447 |

|      |                 |              |             |           |             |
|------|-----------------|--------------|-------------|-----------|-------------|
| 1769 | ENSG00000106049 | -0,211403153 | 6,080951158 | 3,3327389 | 0,080817866 |
| 1770 | ENSG00000106052 | -0,336930554 | 7,601923768 | 2,5853721 | 0,12143115  |
| 1771 | ENSG00000106066 | 0,101936764  | 4,544196641 | 0,099255  | 0,755552282 |
| 1772 | ENSG00000106070 | -0,000301402 | 5,787956346 | 3,017E-06 | 0,998629048 |
| 1773 | ENSG00000106078 | -0,328517549 | 5,524696029 | 3,0221009 | 0,095443197 |
| 1774 | ENSG00000106080 | -0,002837597 | 4,457295011 | 0,000304  | 0,986237667 |
| 1775 | ENSG00000106086 | 0,162067669  | 4,12220042  | 0,9519199 | 0,33933291  |
| 1776 | ENSG00000106100 | -0,170976297 | 4,294495456 | 0,8950757 | 0,353892243 |
| 1777 | ENSG00000106105 | -0,212115086 | 5,55433888  | 4,5239919 | 0,044273438 |
| 1778 | ENSG00000106144 | 0,026978593  | 3,825673237 | 0,0243137 | 0,940914359 |
| 1779 | ENSG00000106153 | -0,244181161 | 7,033169615 | 3,3899537 | 0,078421848 |
| 1780 | ENSG00000106211 | -0,39977458  | 8,846842053 | 0,5602213 | 0,461720313 |
| 1781 | ENSG00000106244 | -0,0725865   | 5,520995746 | 0,3166768 | 0,579011026 |
| 1782 | ENSG00000106245 | 0,075081024  | 3,844903983 | 0,3872624 | 0,686432165 |
| 1783 | ENSG00000106258 | -0,094757105 | 3,847135379 | 0,2163387 | 0,646196396 |
| 1784 | ENSG00000106261 | 0,243371798  | 6,331275427 | 3,5377182 | 0,07260173  |
| 1785 | ENSG00000106263 | -0,043064975 | 6,19631602  | 0,0960514 | 0,759388028 |
| 1786 | ENSG00000106299 | 0,070261004  | 5,779106067 | 0,3552459 | 0,556930915 |
| 1787 | ENSG00000106344 | -0,289761688 | 5,389905929 | 3,4124686 | 0,077546485 |
| 1788 | ENSG00000106355 | -0,3776331   | 4,741894422 | 2,9489163 | 0,099307548 |
| 1789 | ENSG00000106366 | 1,354201247  | 3,984809571 | 12,889578 | 0,001537959 |
| 1790 | ENSG00000106392 | 0,203285847  | 5,101872935 | 1,4918951 | 0,23423551  |
| 1791 | ENSG00000106397 | -0,069223166 | 4,378922494 | 0,1098838 | 0,74326343  |
| 1792 | ENSG00000106399 | -0,128362559 | 3,757018892 | 0,3741108 | 0,546741836 |
| 1793 | ENSG00000106400 | -0,123487182 | 4,583317174 | 0,5353992 | 0,471700185 |
| 1794 | ENSG00000106443 | -0,007330123 | 5,586113803 | 0,0027511 | 0,958619103 |
| 1795 | ENSG00000106459 | -0,112395161 | 4,21587376  | 0,9356012 | 0,411000263 |
| 1796 | ENSG00000106460 | -0,302004563 | 7,02376323  | 1,2983103 | 0,266193728 |
| 1797 | ENSG00000106479 | 0,309817314  | 3,647420175 | 2,7560234 | 0,131476392 |
| 1798 | ENSG00000106484 | 0,718796077  | 4,779090213 | 1,4945505 | 0,233832349 |
| 1799 | ENSG00000106511 | 0,359215433  | 4,153437648 | 3,0913743 | 0,091945136 |
| 1800 | ENSG00000106524 | -0,270466937 | 5,50143146  | 1,1621243 | 0,2921483   |
| 1801 | ENSG00000106537 | -0,405311811 | 4,23068171  | 5,1339128 | 0,033136785 |
| 1802 | ENSG00000106538 | 0,62277112   | 4,790095017 | 2,8552127 | 0,104523914 |
| 1803 | ENSG00000106546 | 0,131564045  | 5,487369186 | 0,2071466 | 0,653259628 |
| 1804 | ENSG00000106554 | -0,646256731 | 6,584924636 | 16,29875  | 0,000508944 |
| 1805 | ENSG00000106565 | -0,432914661 | 6,32986216  | 1,1184484 | 0,301181478 |
| 1806 | ENSG00000106591 | -0,395330278 | 5,197372123 | 5,0703547 | 0,034139385 |
| 1807 | ENSG00000106603 | -0,300784284 | 5,461520874 | 9,9356625 | 0,004430286 |
| 1808 | ENSG00000106605 | -0,262085116 | 4,6736833   | 3,6680537 | 0,067875605 |
| 1809 | ENSG00000106608 | 0,212850464  | 5,072270027 | 2,289187  | 0,143800598 |
| 1810 | ENSG00000106609 | 0,274863724  | 6,110352508 | 4,3562865 | 0,048049435 |
| 1811 | ENSG00000106610 | -0,303023896 | 4,417118334 | 3,0322636 | 0,094920491 |
| 1812 | ENSG00000106615 | -0,260959622 | 5,921502531 | 3,6816475 | 0,067403243 |
| 1813 | ENSG00000106617 | -0,089527195 | 7,449130901 | 0,1043062 | 0,749625605 |
| 1814 | ENSG00000106624 | 0,638950422  | 6,827202234 | 5,8638986 | 0,0237027   |
| 1815 | ENSG00000106628 | -0,04214835  | 5,488302389 | 0,0440812 | 0,835542401 |
| 1816 | ENSG00000106631 | -0,539734464 | 12,53464469 | 2,0044411 | 0,170174235 |
| 1817 | ENSG00000106635 | -0,188496855 | 4,955236921 | 1,4729671 | 0,237135097 |
| 1818 | ENSG00000106636 | -0,065068918 | 5,363342953 | 0,3413649 | 0,564682547 |
| 1819 | ENSG00000106638 | 0,330973814  | 3,85142182  | 4,3370311 | 0,076652825 |
| 1820 | ENSG00000106682 | 0,047799839  | 7,358165029 | 0,2340207 | 0,633094384 |
| 1821 | ENSG00000106692 | 0,018550688  | 5,000610839 | 0,0220034 | 0,883360232 |
| 1822 | ENSG00000106701 | 0,017471865  | 4,148944356 | 0,00521   | 0,943079402 |
| 1823 | ENSG00000106714 | -0,95381867  | 5,357954068 | 5,0868544 | 0,033875883 |
| 1824 | ENSG00000106723 | 0,152941643  | 6,325844832 | 2,6409601 | 0,117653353 |
| 1825 | ENSG00000106733 | 0,32506116   | 3,905307179 | 2,5522422 | 0,123720756 |
| 1826 | ENSG00000106771 | -0,120277068 | 7,383575831 | 0,7078965 | 0,408734175 |
| 1827 | ENSG00000106772 | -0,305143456 | 5,665870643 | 0,8278622 | 0,372282728 |



|      |                 |              |             |           |             |
|------|-----------------|--------------|-------------|-----------|-------------|
| 1828 | ENSG00000106780 | -0,227328115 | 5,257281816 | 1,2301672 | 0,278782131 |
| 1829 | ENSG00000106799 | 0,228940385  | 6,005217117 | 1,1582319 | 0,292938478 |
| 1830 | ENSG00000106803 | 0,033535835  | 4,48384573  | 0,0223448 | 0,882470137 |
| 1831 | ENSG00000106809 | 1,414912282  | 6,65149471  | 6,0421969 | 0,02188228  |
| 1832 | ENSG00000106819 | 1,564429128  | 5,969827374 | 13,912959 | 0,001090283 |
| 1833 | ENSG00000106823 | 1,318201457  | 5,640023479 | 11,630119 | 0,002386159 |
| 1834 | ENSG00000106829 | 0,367394034  | 4,319972165 | 5,9897614 | 0,022398252 |
| 1835 | ENSG00000106853 | -0,26411926  | 4,571335537 | 3,1009383 | 0,091455178 |
| 1836 | ENSG00000106868 | 0,047734492  | 3,924588977 | 0,0647791 | 0,801346634 |
| 1837 | ENSG00000106948 | 0,263454151  | 3,800514995 | 0,8907838 | 0,355027189 |
| 1838 | ENSG00000106991 | 0,568431178  | 7,051773343 | 3,3296601 | 0,080994567 |
| 1839 | ENSG00000106992 | -0,849245747 | 4,372266854 | 7,6231199 | 0,011091277 |
| 1840 | ENSG00000106993 | -0,111691077 | 5,649734057 | 0,2827081 | 0,600005435 |
| 1841 | ENSG00000107020 | -0,69636824  | 4,460159856 | 9,2058045 | 0,005877052 |
| 1842 | ENSG00000107021 | 0,043250028  | 4,081964461 | 0,0572788 | 0,890842341 |
| 1843 | ENSG00000107036 | 0,043452677  | 5,371640829 | 0,0771308 | 0,783693088 |
| 1844 | ENSG00000107077 | 0,087284167  | 5,320749091 | 0,5497288 | 0,465870105 |
| 1845 | ENSG00000107099 | 0,105205666  | 4,475935935 | 0,1482985 | 0,703687788 |
| 1846 | ENSG00000107104 | 0,319174767  | 7,425086655 | 3,1263235 | 0,090236772 |
| 1847 | ENSG00000107164 | 0,268150556  | 5,142042003 | 3,4811241 | 0,074796899 |
| 1848 | ENSG00000107165 | -0,284641507 | 5,281475712 | 0,7351631 | 0,400018335 |
| 1849 | ENSG00000107175 | 0,039351033  | 4,338359145 | 0,0658554 | 0,817668721 |
| 1850 | ENSG00000107185 | 0,131317918  | 4,706323287 | 0,4880761 | 0,491757202 |
| 1851 | ENSG00000107186 | 0,173235668  | 7,364268363 | 1,7361668 | 0,200492965 |
| 1852 | ENSG00000107201 | 0,123686271  | 4,712114158 | 0,5207704 | 0,47775078  |
| 1853 | ENSG00000107223 | -0,190869058 | 6,514609088 | 0,7243106 | 0,403465067 |
| 1854 | ENSG00000107242 | -0,685381562 | 5,596404248 | 7,6175381 | 0,011116979 |
| 1855 | ENSG00000107249 | -0,24615521  | 3,715622699 | 1,5853072 | 0,220566152 |
| 1856 | ENSG00000107262 | -0,19027014  | 6,3393804   | 3,0278388 | 0,095101249 |
| 1857 | ENSG00000107263 | -0,221836993 | 5,881533905 | 0,9838427 | 0,331523203 |
| 1858 | ENSG00000107290 | 0,051147961  | 7,599398727 | 0,1978585 | 0,660578254 |
| 1859 | ENSG00000107317 | -0,26827606  | 5,5838016   | 0,5165443 | 0,479523022 |
| 1860 | ENSG00000107331 | 0,243823744  | 4,509648648 | 1,2993942 | 0,265999564 |
| 1861 | ENSG00000107341 | -0,072816632 | 5,58860937  | 0,3822239 | 0,542439448 |
| 1862 | ENSG00000107362 | -0,117035515 | 3,660502189 | 0,9165432 | 0,536674312 |
| 1863 | ENSG00000107371 | -0,022543401 | 3,680406292 | 0,0277739 | 0,902090598 |
| 1864 | ENSG00000107372 | -0,109964674 | 7,420761948 | 0,5304984 | 0,473692999 |
| 1865 | ENSG00000107438 | -0,239302691 | 6,672937051 | 1,9033772 | 0,180903279 |
| 1866 | ENSG00000107443 | 0,070942321  | 3,45185337  | 0,3297631 | 0,715286706 |
| 1867 | ENSG00000107521 | 0,131815144  | 4,388154871 | 0,5767822 | 0,455253098 |
| 1868 | ENSG00000107537 | -0,088459294 | 5,865200855 | 0,3094027 | 0,583392577 |
| 1869 | ENSG00000107551 | -0,116542495 | 5,749199996 | 0,3663096 | 0,550919726 |
| 1870 | ENSG00000107554 | -0,03085962  | 4,284472723 | 0,0230126 | 0,880740577 |
| 1871 | ENSG00000107560 | 0,040582128  | 5,191241915 | 0,0819349 | 0,777237306 |
| 1872 | ENSG00000107562 | 0,294066673  | 7,120598827 | 3,1270648 | 0,090200937 |
| 1873 | ENSG00000107566 | 0,287880168  | 4,248541694 | 2,381811  | 0,136337391 |
| 1874 | ENSG00000107581 | 0,120372476  | 7,639716545 | 1,5150017 | 0,230713861 |
| 1875 | ENSG00000107614 | -0,196146393 | 3,863363259 | 1,8436961 | 0,269907286 |
| 1876 | ENSG00000107625 | -0,06622333  | 5,437628901 | 0,1349189 | 0,716727348 |
| 1877 | ENSG00000107643 | -0,028726508 | 5,435218696 | 0,0338702 | 0,855588278 |
| 1878 | ENSG00000107651 | 0,050338985  | 5,284310694 | 0,2328239 | 0,633960516 |
| 1879 | ENSG00000107669 | -0,230981623 | 6,349120484 | 2,2600544 | 0,1462914   |
| 1880 | ENSG00000107672 | -0,0918789   | 4,62443957  | 0,6731097 | 0,507904466 |
| 1881 | ENSG00000107679 | -0,133725216 | 6,012060416 | 0,5271682 | 0,475088718 |
| 1882 | ENSG00000107731 | 0,603832458  | 4,552608227 | 5,7285901 | 0,025196882 |
| 1883 | ENSG00000107738 | -0,061586808 | 5,107716094 | 0,0574813 | 0,812635534 |
| 1884 | ENSG00000107742 | 0,861003437  | 4,134123009 | 7,0291669 | 0,014234519 |
| 1885 | ENSG00000107745 | -0,061342882 | 5,548036042 | 0,397307  | 0,534644833 |
| 1886 | ENSG00000107758 | -0,045129073 | 6,293510851 | 0,1735146 | 0,680836635 |

|      |                 |              |             |           |             |
|------|-----------------|--------------|-------------|-----------|-------------|
| 1887 | ENSG00000107771 | -0,025248654 | 7,358786873 | 0,0250367 | 0,87564922  |
| 1888 | ENSG00000107779 | 0,011132992  | 6,451341929 | 0,0075089 | 0,931690173 |
| 1889 | ENSG00000107796 | -1,119685148 | 8,079589788 | 11,640289 | 0,002377534 |
| 1890 | ENSG00000107798 | 0,360420104  | 5,791491484 | 1,3562288 | 0,256072103 |
| 1891 | ENSG00000107816 | 0,267425742  | 4,762752239 | 2,7754072 | 0,109219673 |
| 1892 | ENSG00000107819 | 0,317356324  | 4,622672774 | 3,1470872 | 0,089239197 |
| 1893 | ENSG00000107829 | -0,047918997 | 5,597972954 | 0,0617095 | 0,806007999 |
| 1894 | ENSG00000107854 | 0,207588852  | 6,017931092 | 1,7652101 | 0,196945345 |
| 1895 | ENSG00000107862 | 0,179423605  | 5,917309589 | 0,7789717 | 0,386543438 |
| 1896 | ENSG00000107863 | 0,24919409   | 6,974763619 | 2,8643465 | 0,103968721 |
| 1897 | ENSG00000107864 | 0,127144297  | 4,779438366 | 0,4366213 | 0,515290446 |
| 1898 | ENSG00000107874 | -0,065695166 | 4,843360774 | 0,1261394 | 0,7256895   |
| 1899 | ENSG00000107890 | -0,259859123 | 5,582450295 | 2,2527835 | 0,146912787 |
| 1900 | ENSG00000107897 | 0,088482119  | 5,662951792 | 0,3133765 | 0,581000945 |
| 1901 | ENSG00000107929 | 0,036104378  | 5,818344395 | 0,0456334 | 0,832716857 |
| 1902 | ENSG00000107937 | -0,233412283 | 5,169087914 | 2,9464267 | 0,099399879 |
| 1903 | ENSG00000107938 | -0,100078897 | 4,57295631  | 0,7508235 | 0,470191378 |
| 1904 | ENSG00000107949 | -0,247396802 | 5,194917689 | 2,5932408 | 0,120894698 |
| 1905 | ENSG00000107951 | -0,135833659 | 4,79198523  | 1,7279973 | 0,250234124 |
| 1906 | ENSG00000107957 | -0,039606728 | 6,013683876 | 0,0276547 | 0,869369407 |
| 1907 | ENSG00000107959 | 0,08874805   | 5,913635904 | 0,4762695 | 0,496965063 |
| 1908 | ENSG00000107960 | -0,014901912 | 4,603359207 | 0,0249954 | 0,937992985 |
| 1909 | ENSG00000107968 | 0,181407958  | 4,670158827 | 0,2588345 | 0,615744358 |
| 1910 | ENSG00000108001 | 0,308792244  | 3,98362982  | 3,2059198 | 0,086481078 |
| 1911 | ENSG00000108010 | -0,350377723 | 5,380605536 | 6,5608942 | 0,017385783 |
| 1912 | ENSG00000108021 | -0,049290728 | 6,466234823 | 0,1519439 | 0,700241027 |
| 1913 | ENSG00000108039 | -0,152933803 | 5,430871524 | 1,6533647 | 0,211191235 |
| 1914 | ENSG00000108055 | 0,032936629  | 5,807185701 | 0,0778569 | 0,782695756 |
| 1915 | ENSG00000108061 | -0,154005912 | 6,251465224 | 0,8707742 | 0,360387693 |
| 1916 | ENSG00000108064 | -0,093177936 | 5,263813847 | 0,279773  | 0,601893288 |
| 1917 | ENSG00000108091 | -0,010553534 | 5,575302348 | 0,0043472 | 0,947997832 |
| 1918 | ENSG00000108094 | -0,08601808  | 5,285544435 | 0,5657535 | 0,494660012 |
| 1919 | ENSG00000108100 | 0,24841383   | 5,978915605 | 7,0625968 | 0,014009584 |
| 1920 | ENSG00000108107 | 0,16511185   | 6,410117727 | 0,5562288 | 0,463301939 |
| 1921 | ENSG00000108175 | 0,127406782  | 5,709373751 | 0,212258  | 0,649308998 |
| 1922 | ENSG00000108179 | -0,438902771 | 6,203506215 | 4,445224  | 0,046043149 |
| 1923 | ENSG00000108219 | -0,389046211 | 5,110204962 | 3,3520055 | 0,080047068 |
| 1924 | ENSG00000108239 | 0,30656538   | 4,654072059 | 2,2526729 | 0,146922255 |
| 1925 | ENSG00000108256 | 0,11451032   | 7,230076907 | 0,5874511 | 0,45114327  |
| 1926 | ENSG00000108262 | 0,060514918  | 4,3525402   | 0,0977791 | 0,757315189 |
| 1927 | ENSG00000108298 | 0,288501228  | 8,592416909 | 2,3396564 | 0,139653478 |
| 1928 | ENSG00000108306 | 0,361441772  | 4,938709817 | 3,8772246 | 0,061048463 |
| 1929 | ENSG00000108312 | 0,355586016  | 5,523271873 | 5,0106727 | 0,035111873 |
| 1930 | ENSG00000108344 | -0,070853634 | 5,58402019  | 0,2303221 | 0,635789307 |
| 1931 | ENSG00000108349 | 0,174159428  | 5,551210861 | 1,2630692 | 0,272608615 |
| 1932 | ENSG00000108384 | -0,294977678 | 4,279998095 | 2,7924657 | 0,108195595 |
| 1933 | ENSG00000108387 | -0,013891043 | 4,453529912 | 0,0053928 | 0,942091121 |
| 1934 | ENSG00000108389 | 0,110468673  | 4,980493425 | 0,5262746 | 0,475459053 |
| 1935 | ENSG00000108395 | -0,162961935 | 5,139006958 | 2,9246293 | 0,158722706 |
| 1936 | ENSG00000108406 | 0,151024228  | 5,542069503 | 0,9301951 | 0,344795655 |
| 1937 | ENSG00000108424 | 0,092167134  | 7,081749569 | 0,6633872 | 0,423650872 |
| 1938 | ENSG00000108433 | -0,107767072 | 5,225314165 | 0,8960363 | 0,353605063 |
| 1939 | ENSG00000108439 | 0,038102462  | 3,730150262 | 0,0550847 | 0,868672437 |
| 1940 | ENSG00000108443 | 0,05025743   | 5,37850029  | 0,2032255 | 0,65631598  |
| 1941 | ENSG00000108468 | 0,106758798  | 5,127383387 | 1,2265434 | 0,358296229 |
| 1942 | ENSG00000108506 | 0,166417378  | 4,70465042  | 2,7692001 | 0,169201661 |
| 1943 | ENSG00000108510 | 0,224325135  | 7,065730969 | 2,438392  | 0,131939744 |
| 1944 | ENSG00000108515 | -1,030478722 | 7,589888071 | 8,948825  | 0,006497664 |
| 1945 | ENSG00000108518 | -0,077572432 | 6,261733697 | 0,195421  | 0,662551354 |

|      |                 |              |             |           |             |
|------|-----------------|--------------|-------------|-----------|-------------|
| 1946 | ENSG00000108523 | -0,22004665  | 5,247806925 | 2,0646671 | 0,164147761 |
| 1947 | ENSG00000108528 | -0,203249232 | 6,374778783 | 0,8535112 | 0,365106087 |
| 1948 | ENSG00000108559 | -0,144533119 | 4,728347    | 1,8274528 | 0,276280147 |
| 1949 | ENSG00000108561 | -0,306378767 | 5,609336298 | 6,201324  | 0,020359524 |
| 1950 | ENSG00000108578 | 0,191052004  | 4,417232554 | 2,1497097 | 0,189977419 |
| 1951 | ENSG00000108582 | 0,239689648  | 6,475549741 | 3,0111541 | 0,095963503 |
| 1952 | ENSG00000108587 | 0,125655879  | 5,24032668  | 1,2155576 | 0,281543319 |
| 1953 | ENSG00000108588 | -0,302910249 | 6,627321402 | 6,5219151 | 0,017683403 |
| 1954 | ENSG00000108591 | 0,027632199  | 3,694900088 | 0,0290984 | 0,941217575 |
| 1955 | ENSG00000108592 | -0,246905007 | 5,195546343 | 2,6213814 | 0,118998872 |
| 1956 | ENSG00000108599 | 0,060951185  | 4,841912105 | 0,3178091 | 0,57833788  |
| 1957 | ENSG00000108604 | 0,197317853  | 4,757476179 | 0,6268498 | 0,436563856 |
| 1958 | ENSG00000108639 | 0,153779179  | 5,261350253 | 1,0905823 | 0,307127039 |
| 1959 | ENSG00000108651 | -0,211866894 | 4,851366812 | 3,2691379 | 0,105145477 |
| 1960 | ENSG00000108654 | -0,084229363 | 9,145770363 | 0,2843159 | 0,598959005 |
| 1961 | ENSG00000108666 | -0,179735166 | 4,274335276 | 1,2013036 | 0,284350739 |
| 1962 | ENSG00000108669 | -0,199913281 | 5,191267065 | 2,1777508 | 0,153470938 |
| 1963 | ENSG00000108671 | -0,210393403 | 5,719587045 | 3,9239413 | 0,059581599 |
| 1964 | ENSG00000108679 | -0,299222537 | 7,61695812  | 1,0232238 | 0,322228568 |
| 1965 | ENSG00000108691 | -0,230657961 | 6,211730664 | 0,1831127 | 0,672672673 |
| 1966 | ENSG00000108773 | 0,061746294  | 4,649742867 | 0,0961932 | 0,759226025 |
| 1967 | ENSG00000108788 | -0,364223191 | 5,064327826 | 5,1564775 | 0,032788802 |
| 1968 | ENSG00000108799 | 0,25025708   | 5,91583975  | 2,761662  | 0,110053088 |
| 1969 | ENSG00000108821 | 0,510189482  | 6,866027268 | 1,7474247 | 0,199135598 |
| 1970 | ENSG00000108823 | 0,029605401  | 5,43470048  | 0,0200722 | 0,888563186 |
| 1971 | ENSG00000108826 | -0,564324899 | 4,954375015 | 15,809396 | 0,00059007  |
| 1972 | ENSG00000108828 | -0,023987097 | 5,942223041 | 0,0133173 | 0,90912421  |
| 1973 | ENSG00000108829 | 0,025848871  | 5,123625499 | 0,0250824 | 0,875537581 |
| 1974 | ENSG00000108840 | 0,25956616   | 5,518417941 | 2,3638121 | 0,137756864 |
| 1975 | ENSG00000108848 | -0,038444187 | 6,816612309 | 0,0818336 | 0,777367298 |
| 1976 | ENSG00000108854 | 0,324021349  | 5,154065409 | 4,7832483 | 0,039109762 |
| 1977 | ENSG00000108861 | -0,078139459 | 7,810441691 | 0,1479925 | 0,703978272 |
| 1978 | ENSG00000108883 | -0,069481839 | 5,506465055 | 0,2015459 | 0,657657054 |
| 1979 | ENSG00000108924 | 0,484294107  | 5,379999369 | 8,4849394 | 0,007808838 |
| 1980 | ENSG00000108946 | 0,254798603  | 9,139933054 | 1,0518527 | 0,315695529 |
| 1981 | ENSG00000108950 | -0,472045208 | 4,358699519 | 4,6716322 | 0,041262447 |
| 1982 | ENSG00000108953 | -0,139381588 | 7,777356806 | 1,8080058 | 0,191750769 |
| 1983 | ENSG00000108960 | 0,669309303  | 4,725493098 | 3,0315702 | 0,09495605  |
| 1984 | ENSG00000108984 | 0,061928515  | 4,256998557 | 0,0590297 | 0,810179389 |
| 1985 | ENSG00000109016 | -0,399808689 | 4,267167196 | 7,3174926 | 0,012586967 |
| 1986 | ENSG00000109046 | 0,001259456  | 7,433149583 | 5,099E-05 | 0,994364065 |
| 1987 | ENSG00000109072 | -0,886059894 | 4,561334346 | 4,6699214 | 0,041296409 |
| 1988 | ENSG00000109079 | -0,10813195  | 5,214878208 | 0,4515685 | 0,508253167 |
| 1989 | ENSG00000109099 | -0,578185644 | 6,891413304 | 14,706989 | 0,000838637 |
| 1990 | ENSG00000109107 | -0,667530434 | 6,593090812 | 8,9070238 | 0,00660527  |
| 1991 | ENSG00000109111 | 0,230962373  | 6,335361199 | 1,7658256 | 0,196870087 |
| 1992 | ENSG00000109113 | 0,567747423  | 4,635305451 | 5,6158959 | 0,026521701 |
| 1993 | ENSG00000109118 | 0,120149272  | 4,257695503 | 0,2561903 | 0,617543584 |
| 1994 | ENSG00000109133 | 0,007587551  | 5,805853646 | 0,0024416 | 0,961014728 |
| 1995 | ENSG00000109171 | -0,122620935 | 6,222015703 | 0,9969011 | 0,328364808 |
| 1996 | ENSG00000109180 | -0,212609269 | 6,721475874 | 3,0304795 | 0,094965603 |
| 1997 | ENSG00000109184 | -0,062462631 | 5,949695339 | 0,1190462 | 0,733191437 |
| 1998 | ENSG00000109189 | 0,114850987  | 6,085502229 | 0,2805195 | 0,601411959 |
| 1999 | ENSG00000109270 | -0,250891885 | 5,343051707 | 1,3235432 | 0,261721329 |
| 2000 | ENSG00000109320 | 0,521720669  | 5,584355952 | 3,0529572 | 0,093866364 |
| 2001 | ENSG00000109323 | 0,235011678  | 5,326747105 | 3,891372  | 0,060570349 |
| 2002 | ENSG00000109332 | -0,189181629 | 7,950329117 | 1,2953796 | 0,266686787 |
| 2003 | ENSG00000109339 | 0,43433366   | 5,459817146 | 2,1176795 | 0,159055496 |
| 2004 | ENSG00000109381 | -0,019858679 | 6,062580608 | 0,0211073 | 0,885742243 |

|      |                 |              |             |           |             |
|------|-----------------|--------------|-------------|-----------|-------------|
| 2005 | ENSG00000109390 | -0,571649399 | 6,108036669 | 9,1242749 | 0,006066584 |
| 2006 | ENSG00000109436 | 0,482562349  | 5,207966421 | 5,3206108 | 0,030377253 |
| 2007 | ENSG00000109445 | -0,344449179 | 6,126185621 | 3,1575756 | 0,088740137 |
| 2008 | ENSG00000109452 | 0,093413636  | 6,197375712 | 0,0852329 | 0,772931809 |
| 2009 | ENSG00000109458 | 0,044817881  | 6,631805098 | 0,0837868 | 0,774810465 |
| 2010 | ENSG00000109466 | -0,032654725 | 4,204494444 | 0,038979  | 0,845216275 |
| 2011 | ENSG00000109472 | 0,429303759  | 6,577150247 | 3,1511885 | 0,089043666 |
| 2012 | ENSG00000109475 | 0,163974883  | 8,003769257 | 0,4401982 | 0,513590691 |
| 2013 | ENSG00000109501 | -0,010870122 | 5,281024359 | 0,0026444 | 0,959429504 |
| 2014 | ENSG00000109519 | -0,27933221  | 5,035347541 | 5,3884579 | 0,029405217 |
| 2015 | ENSG00000109536 | -0,296411525 | 4,587010631 | 2,6993998 | 0,113922668 |
| 2016 | ENSG00000109572 | -0,342866547 | 6,981076151 | 5,9303393 | 0,022977833 |
| 2017 | ENSG00000109586 | 0,059844418  | 3,967342424 | 0,1802753 | 0,675054947 |
| 2018 | ENSG00000109606 | -0,228775239 | 6,723516622 | 2,1510272 | 0,155949665 |
| 2019 | ENSG00000109618 | 0,008382856  | 4,220290683 | 0,0022913 | 0,962233223 |
| 2020 | ENSG00000109654 | -0,029496841 | 5,953120994 | 0,0418257 | 0,839738868 |
| 2021 | ENSG00000109670 | -0,278171036 | 6,280245476 | 1,6214904 | 0,215542401 |
| 2022 | ENSG00000109680 | 0,237468978  | 4,148784828 | 2,494377  | 0,127843126 |
| 2023 | ENSG00000109685 | 0,120805115  | 5,538646566 | 0,7889514 | 0,383539406 |
| 2024 | ENSG00000109686 | 0,248298924  | 7,156407452 | 3,0275392 | 0,095116651 |
| 2025 | ENSG00000109689 | 0,178706218  | 4,357773653 | 0,8005621 | 0,380148798 |
| 2026 | ENSG00000109738 | 0,211913693  | 3,770273452 | 1,4659043 | 0,244618104 |
| 2027 | ENSG00000109756 | 0,025508822  | 6,502068175 | 0,051862  | 0,821850011 |
| 2028 | ENSG00000109762 | -0,025632517 | 4,908139824 | 0,0368918 | 0,849357262 |
| 2029 | ENSG00000109771 | -0,330792801 | 3,7665777   | 1,5615943 | 0,223938538 |
| 2030 | ENSG00000109775 | -0,157285161 | 5,161301094 | 0,830289  | 0,371594997 |
| 2031 | ENSG00000109787 | 0,129898518  | 5,826486379 | 0,4217089 | 0,522487238 |
| 2032 | ENSG00000109790 | 0,084220475  | 4,860583716 | 0,3446651 | 0,562832742 |
| 2033 | ENSG00000109814 | 0,457810369  | 5,051308348 | 1,8251881 | 0,189775151 |
| 2034 | ENSG00000109819 | -0,338989645 | 7,081859814 | 0,9430555 | 0,341547094 |
| 2035 | ENSG00000109846 | -0,129486578 | 10,13278379 | 0,2472629 | 0,623706406 |
| 2036 | ENSG00000109854 | -0,390420234 | 3,768681221 | 8,4404934 | 0,039450503 |
| 2037 | ENSG00000109861 | -0,250164014 | 5,781022    | 1,041666  | 0,317999108 |
| 2038 | ENSG00000109906 | -0,164162632 | 6,35859898  | 0,1236366 | 0,72830868  |
| 2039 | ENSG00000109911 | -0,151796926 | 4,833123097 | 0,7196108 | 0,404971627 |
| 2040 | ENSG00000109917 | -0,002336219 | 4,580455103 | 0,0003398 | 0,995436344 |
| 2041 | ENSG00000109919 | -0,389930422 | 5,652228568 | 9,0908851 | 0,006130974 |
| 2042 | ENSG00000109920 | -0,290880333 | 6,260708737 | 1,5901884 | 0,219879921 |
| 2043 | ENSG00000109929 | -0,05357284  | 5,481890998 | 0,0873581 | 0,770202022 |
| 2044 | ENSG00000109971 | -0,068950725 | 9,925447863 | 0,0798215 | 0,780051231 |
| 2045 | ENSG00000110002 | 0,420755206  | 3,953879982 | 3,0998923 | 0,091525343 |
| 2046 | ENSG00000110013 | -0,415614342 | 5,615700537 | 6,6099928 | 0,017044668 |
| 2047 | ENSG00000110047 | -0,038215145 | 4,576204875 | 0,0230015 | 0,880769324 |
| 2048 | ENSG00000110048 | 0,23104854   | 5,926976574 | 3,5315551 | 0,07283436  |
| 2049 | ENSG00000110066 | 0,09280904   | 5,726285877 | 1,2402261 | 0,280138131 |
| 2050 | ENSG00000110074 | -0,211738497 | 4,308084248 | 1,4495773 | 0,240781681 |
| 2051 | ENSG00000110075 | -0,159384205 | 7,014531413 | 1,7879348 | 0,194145028 |
| 2052 | ENSG00000110077 | -0,395439141 | 5,554893703 | 2,1819097 | 0,153138261 |
| 2053 | ENSG00000110079 | -0,948568671 | 4,630704811 | 13,153962 | 0,001405674 |
| 2054 | ENSG00000110080 | -0,291722342 | 5,000033944 | 4,4907455 | 0,044994773 |
| 2055 | ENSG00000110090 | 0,231067305  | 5,922174509 | 1,4696348 | 0,237650294 |
| 2056 | ENSG00000110092 | 0,72396287   | 6,167291262 | 13,334192 | 0,001322649 |
| 2057 | ENSG00000110107 | -0,014388    | 4,830839568 | 0,005287  | 0,942661276 |
| 2058 | ENSG00000110108 | -0,000920707 | 5,819123151 | 2,71E-05  | 0,995890921 |
| 2059 | ENSG00000110172 | -0,099976367 | 5,715496996 | 0,2402023 | 0,628680136 |
| 2060 | ENSG00000110218 | -0,224670628 | 4,278142208 | 1,8899122 | 0,182394294 |
| 2061 | ENSG00000110237 | 0,210080167  | 5,67548246  | 1,0424383 | 0,317823662 |
| 2062 | ENSG00000110274 | 0,352276377  | 3,887356862 | 2,8159861 | 0,106801919 |
| 2063 | ENSG00000110315 | -0,206862269 | 5,867550022 | 1,0102351 | 0,325253879 |

|      |                 |              |             |           |             |
|------|-----------------|--------------|-------------|-----------|-------------|
| 2064 | ENSG00000110318 | 0,161655521  | 4,003822239 | 0,7674343 | 0,390025893 |
| 2065 | ENSG00000110321 | 0,029396692  | 9,258653873 | 0,0447627 | 0,834289064 |
| 2066 | ENSG00000110324 | 0,112379234  | 4,191294339 | 0,1482963 | 0,703689915 |
| 2067 | ENSG00000110328 | 0,200436208  | 4,337819959 | 2,1376145 | 0,200857642 |
| 2068 | ENSG00000110330 | -0,06357968  | 6,03962505  | 0,1093287 | 0,743888465 |
| 2069 | ENSG00000110344 | -0,102793329 | 6,043578777 | 1,0701203 | 0,311584319 |
| 2070 | ENSG00000110367 | 0,203322932  | 8,053942963 | 2,5027192 | 0,127191774 |
| 2071 | ENSG00000110395 | 0,180952981  | 5,267379451 | 0,8827747 | 0,357159046 |
| 2072 | ENSG00000110422 | -0,236120464 | 8,669285724 | 2,3363482 | 0,139909775 |
| 2073 | ENSG00000110429 | -0,088972648 | 6,030322689 | 0,3177935 | 0,578365936 |
| 2074 | ENSG00000110435 | -0,443674966 | 6,29858493  | 4,2674496 | 0,050236709 |
| 2075 | ENSG00000110442 | -0,314805385 | 4,373679437 | 5,3964788 | 0,03428712  |
| 2076 | ENSG00000110455 | 0,397448485  | 3,771673034 | 2,4243529 | 0,13305079  |
| 2077 | ENSG00000110497 | 0,157446899  | 4,517896788 | 0,8502138 | 0,366017458 |
| 2078 | ENSG00000110514 | 0,02279828   | 5,527209542 | 0,0106153 | 0,918827438 |
| 2079 | ENSG00000110583 | -0,290012448 | 4,720044212 | 1,8300114 | 0,18921262  |
| 2080 | ENSG00000110619 | -0,308839914 | 4,167610376 | 3,3842744 | 0,078701182 |
| 2081 | ENSG00000110651 | 0,200466579  | 7,892194779 | 0,9625258 | 0,336710032 |
| 2082 | ENSG00000110665 | -0,791722938 | 4,045417061 | 8,9851653 | 0,006405682 |
| 2083 | ENSG00000110693 | 0,246563977  | 5,71574349  | 2,5267393 | 0,125517972 |
| 2084 | ENSG00000110696 | -0,014669761 | 7,128567167 | 0,0147887 | 0,904256204 |
| 2085 | ENSG00000110700 | 0,099162724  | 7,954450629 | 0,2473336 | 0,623657049 |
| 2086 | ENSG00000110713 | -0,039103731 | 6,643351358 | 0,1185649 | 0,733698655 |
| 2087 | ENSG00000110717 | -0,273128522 | 5,835516215 | 1,376387  | 0,252666642 |
| 2088 | ENSG00000110721 | -0,023950807 | 3,816490947 | 0,0140866 | 0,906548765 |
| 2089 | ENSG00000110756 | 0,112053327  | 5,155324746 | 0,5498852 | 0,465833289 |
| 2090 | ENSG00000110768 | 0,031077738  | 5,25095537  | 0,032366  | 0,858794766 |
| 2091 | ENSG00000110799 | 0,501358192  | 8,6470907   | 3,2557388 | 0,084222213 |
| 2092 | ENSG00000110841 | 0,279467189  | 6,913944422 | 2,8482961 | 0,104921434 |
| 2093 | ENSG00000110851 | 0,073729079  | 4,480500024 | 0,5188966 | 0,621762069 |
| 2094 | ENSG00000110852 | 0,034092607  | 3,932346884 | 0,0161319 | 0,900029972 |
| 2095 | ENSG00000110871 | -0,312899212 | 4,617920913 | 5,0110433 | 0,035075038 |
| 2096 | ENSG00000110880 | 0,140555781  | 6,439907864 | 0,8357773 | 0,37004502  |
| 2097 | ENSG00000110888 | -0,006966105 | 5,199700659 | 0,0046305 | 0,9463306   |
| 2098 | ENSG00000110906 | -0,168040675 | 5,56165034  | 1,1059828 | 0,303828444 |
| 2099 | ENSG00000110911 | -0,316395947 | 5,761708888 | 6,9181068 | 0,014900711 |
| 2100 | ENSG00000110917 | -0,096103145 | 7,491234093 | 0,3348299 | 0,568425272 |
| 2101 | ENSG00000110925 | 0,070724333  | 4,883643539 | 0,2907913 | 0,667061199 |
| 2102 | ENSG00000110931 | 0,166073755  | 4,69531747  | 0,8291532 | 0,371916646 |
| 2103 | ENSG00000110955 | -0,315758581 | 10,15513024 | 2,5341674 | 0,124944193 |
| 2104 | ENSG00000110958 | 0,016636047  | 6,757586609 | 0,0130277 | 0,910110869 |
| 2105 | ENSG00000110987 | 0,556777783  | 3,926213618 | 7,1723925 | 0,013395226 |
| 2106 | ENSG00000111011 | -0,159588953 | 6,158869957 | 1,5954918 | 0,21909385  |
| 2107 | ENSG00000111052 | -0,202153081 | 4,563419884 | 0,8904312 | 0,355120671 |
| 2108 | ENSG00000111058 | -0,006955651 | 5,550998712 | 0,0022412 | 0,962647812 |
| 2109 | ENSG00000111077 | 0,172012787  | 6,313775178 | 0,5147083 | 0,480296366 |
| 2110 | ENSG00000111142 | -0,352575135 | 6,316574001 | 2,9716836 | 0,098086229 |
| 2111 | ENSG00000111144 | -0,077099409 | 5,693359989 | 0,4079354 | 0,529276427 |
| 2112 | ENSG00000111145 | 0,040602092  | 5,242170205 | 0,0869324 | 0,770738432 |
| 2113 | ENSG00000111196 | -0,105882877 | 3,714456037 | 0,3668891 | 0,630199543 |
| 2114 | ENSG00000111203 | 0,108819039  | 3,803525866 | 0,4227922 | 0,612115252 |
| 2115 | ENSG00000111224 | 0,009332171  | 3,676181972 | 0,0062501 | 0,944239513 |
| 2116 | ENSG00000111229 | -0,149607799 | 5,731518381 | 0,7270518 | 0,402590249 |
| 2117 | ENSG00000111231 | -0,224095188 | 4,370682421 | 1,5474471 | 0,225981507 |
| 2118 | ENSG00000111237 | -0,310809071 | 5,566640334 | 4,7950891 | 0,038866829 |
| 2119 | ENSG00000111245 | -0,30589485  | 7,612471627 | 0,5148426 | 0,480239753 |
| 2120 | ENSG00000111252 | 0,073398956  | 5,329536528 | 0,1641346 | 0,689103577 |
| 2121 | ENSG00000111266 | 0,320875256  | 5,025652813 | 5,9606115 | 0,022665054 |
| 2122 | ENSG00000111269 | 0,341805304  | 5,7778235   | 3,5557184 | 0,071971578 |

|      |                 |              |             |           |             |
|------|-----------------|--------------|-------------|-----------|-------------|
| 2123 | ENSG00000111271 | 0,093324702  | 4,506277752 | 0,239517  | 0,629167737 |
| 2124 | ENSG00000111275 | 0,066121841  | 7,096851354 | 0,1164343 | 0,736017044 |
| 2125 | ENSG00000111276 | 0,325725619  | 5,228681911 | 8,8859528 | 0,006644355 |
| 2126 | ENSG00000111300 | -0,261997308 | 5,496823838 | 4,1134109 | 0,054180392 |
| 2127 | ENSG00000111321 | -0,223608826 | 4,426098594 | 1,0444058 | 0,31737729  |
| 2128 | ENSG00000111328 | -0,266299394 | 5,280501929 | 3,8875064 | 0,060688933 |
| 2129 | ENSG00000111331 | 0,660318015  | 4,09163719  | 5,8502024 | 0,023849362 |
| 2130 | ENSG00000111335 | 0,264891147  | 3,893181748 | 2,1546195 | 0,155619471 |
| 2131 | ENSG00000111341 | 0,631976439  | 9,025312612 | 5,3861006 | 0,029470936 |
| 2132 | ENSG00000111348 | 0,086451852  | 5,8461501   | 0,2638416 | 0,612368875 |
| 2133 | ENSG00000111358 | -0,109906305 | 4,215000872 | 0,5864021 | 0,54528264  |
| 2134 | ENSG00000111361 | -0,053559449 | 4,762425912 | 0,216556  | 0,654967928 |
| 2135 | ENSG00000111371 | -0,395792746 | 7,754061724 | 1,564194  | 0,223565663 |
| 2136 | ENSG00000111412 | 0,165582548  | 4,001118175 | 1,4772456 | 0,329129804 |
| 2137 | ENSG00000111450 | -0,072053538 | 4,967998496 | 0,260069  | 0,614898367 |
| 2138 | ENSG00000111452 | -0,148165768 | 6,666744278 | 0,3714303 | 0,548170561 |
| 2139 | ENSG00000111481 | -0,156406847 | 6,160337112 | 1,5827872 | 0,220878085 |
| 2140 | ENSG00000111530 | 0,197268852  | 6,543345258 | 1,2951847 | 0,266754636 |
| 2141 | ENSG00000111540 | -0,059396905 | 6,71838205  | 0,244755  | 0,625446539 |
| 2142 | ENSG00000111554 | -0,261157539 | 3,853797201 | 2,8579709 | 0,152515312 |
| 2143 | ENSG00000111581 | -0,145241849 | 5,104309358 | 0,8421932 | 0,368247983 |
| 2144 | ENSG00000111596 | -0,125612711 | 6,046954406 | 0,551516  | 0,465180359 |
| 2145 | ENSG00000111605 | -0,051668885 | 6,254164373 | 0,1632468 | 0,689885984 |
| 2146 | ENSG00000111615 | -0,238618964 | 5,588562136 | 1,6466527 | 0,212133207 |
| 2147 | ENSG00000111639 | -0,537263645 | 5,895212599 | 9,3284608 | 0,005604063 |
| 2148 | ENSG00000111640 | -0,278050425 | 10,1219724  | 1,5232699 | 0,229484893 |
| 2149 | ENSG00000111642 | -0,039105474 | 4,239991624 | 0,0592907 | 0,809768788 |
| 2150 | ENSG00000111647 | 0,1791418    | 5,463870684 | 1,3302246 | 0,260553485 |
| 2151 | ENSG00000111652 | -0,028515758 | 5,384236342 | 0,052074  | 0,821492682 |
| 2152 | ENSG00000111653 | 0,161651188  | 4,10063874  | 1,6824885 | 0,318528115 |
| 2153 | ENSG00000111666 | -0,656721043 | 6,499199004 | 11,8321   | 0,002221104 |
| 2154 | ENSG00000111667 | 0,188612852  | 5,277916431 | 1,0988292 | 0,305361635 |
| 2155 | ENSG00000111669 | -0,487929438 | 8,439210582 | 6,0973918 | 0,021348178 |
| 2156 | ENSG00000111670 | -0,184468199 | 6,069698116 | 1,1098167 | 0,303011018 |
| 2157 | ENSG00000111674 | 0,414542063  | 4,483462541 | 2,8132522 | 0,106962835 |
| 2158 | ENSG00000111676 | 0,153818758  | 5,456744444 | 0,3722689 | 0,547722799 |
| 2159 | ENSG00000111707 | 0,16878439   | 5,422595831 | 3,4898911 | 0,090398962 |
| 2160 | ENSG00000111711 | -0,013512282 | 5,339888714 | 0,0038793 | 0,950872022 |
| 2161 | ENSG00000111716 | -0,723491759 | 6,776874875 | 3,3921572 | 0,078376362 |
| 2162 | ENSG00000111725 | 0,069121406  | 3,901918324 | 0,264075  | 0,740289507 |
| 2163 | ENSG00000111726 | -0,110108095 | 5,025652755 | 1,081778  | 0,402437687 |
| 2164 | ENSG00000111727 | -0,044459381 | 5,203927712 | 0,0460146 | 0,83203051  |
| 2165 | ENSG00000111731 | -0,048417971 | 5,690885772 | 0,1346377 | 0,716997551 |
| 2166 | ENSG00000111737 | 0,030447977  | 4,246572963 | 0,0453218 | 0,936406003 |
| 2167 | ENSG00000111752 | 0,236233004  | 4,521764581 | 1,2321747 | 0,278400224 |
| 2168 | ENSG00000111775 | 0,158344362  | 4,52744853  | 0,5932199 | 0,448978085 |
| 2169 | ENSG00000111785 | -0,053821275 | 4,987316751 | 0,1751118 | 0,679457556 |
| 2170 | ENSG00000111786 | 0,114929641  | 4,061066906 | 0,6983725 | 0,520677702 |
| 2171 | ENSG00000111790 | 0,097388904  | 5,818277102 | 0,254299  | 0,618837811 |
| 2172 | ENSG00000111799 | -0,373635841 | 6,951609896 | 2,2181693 | 0,149914602 |
| 2173 | ENSG00000111801 | 0,552726313  | 4,429532383 | 4,4865291 | 0,045126301 |
| 2174 | ENSG00000111802 | -0,046773336 | 5,109785727 | 0,1233894 | 0,72855796  |
| 2175 | ENSG00000111816 | 0,195401753  | 4,697333823 | 1,2550896 | 0,27408919  |
| 2176 | ENSG00000111817 | 0,299189913  | 5,827262375 | 0,9814149 | 0,332108308 |
| 2177 | ENSG00000111832 | -0,424087923 | 5,990257066 | 5,7717293 | 0,024709406 |
| 2178 | ENSG00000111843 | 0,012955068  | 6,059551851 | 0,0070499 | 0,933808306 |
| 2179 | ENSG00000111845 | -0,304021744 | 3,89825739  | 3,5189085 | 0,101191566 |
| 2180 | ENSG00000111846 | 0,949061182  | 3,721134794 | 13,302678 | 0,00133677  |
| 2181 | ENSG00000111850 | -0,180806153 | 4,845211624 | 0,7313384 | 0,401227986 |

|      |                 |              |             |           |             |
|------|-----------------|--------------|-------------|-----------|-------------|
| 2182 | ENSG00000111859 | 0,275476667  | 5,705899957 | 0,9699909 | 0,334880841 |
| 2183 | ENSG00000111860 | -0,544182351 | 5,256846162 | 7,7545188 | 0,010504787 |
| 2184 | ENSG00000111875 | -0,373206995 | 4,664173756 | 3,1539529 | 0,088912148 |
| 2185 | ENSG00000111877 | 0,113995559  | 4,055236863 | 0,8327539 | 0,469995685 |
| 2186 | ENSG00000111880 | -0,093016955 | 4,64343952  | 0,4023238 | 0,539341592 |
| 2187 | ENSG00000111885 | -0,249804685 | 6,232120852 | 0,8433205 | 0,367933313 |
| 2188 | ENSG00000111897 | -0,237435404 | 8,556311532 | 1,1061463 | 0,30379352  |
| 2189 | ENSG00000111906 | -0,530437596 | 5,50267449  | 10,95232  | 0,00304614  |
| 2190 | ENSG00000111907 | -0,679691588 | 5,15429592  | 11,9233   | 0,00215071  |
| 2191 | ENSG00000111911 | -0,139487407 | 5,265420367 | 0,828639  | 0,372062395 |
| 2192 | ENSG00000111912 | 0,474011829  | 5,365774297 | 3,0418978 | 0,094428029 |
| 2193 | ENSG00000111961 | 0,057420595  | 6,246533843 | 0,0666024 | 0,798633592 |
| 2194 | ENSG00000112031 | -0,502194638 | 4,481284814 | 17,180184 | 0,000515688 |
| 2195 | ENSG00000112062 | -0,024976039 | 5,900978471 | 0,0349514 | 0,853323145 |
| 2196 | ENSG00000112078 | -0,013501866 | 6,190082208 | 0,0089371 | 0,925495882 |
| 2197 | ENSG00000112079 | -0,174641461 | 5,49375136  | 1,1759588 | 0,289362762 |
| 2198 | ENSG00000112081 | -0,11726384  | 7,168563552 | 0,6274228 | 0,436335781 |
| 2199 | ENSG00000112096 | 0,01370476   | 8,81228492  | 0,0042167 | 0,948783032 |
| 2200 | ENSG00000112110 | -0,334244687 | 4,754932453 | 6,0935035 | 0,021358313 |
| 2201 | ENSG00000112118 | 0,037360267  | 5,137011042 | 0,0861732 | 0,981294343 |
| 2202 | ENSG00000112130 | -0,133266552 | 4,550108943 | 1,7582325 | 0,316278255 |
| 2203 | ENSG00000112137 | -0,42244399  | 3,990158011 | 1,6811538 | 0,207567519 |
| 2204 | ENSG00000112144 | 0,357701859  | 4,858877532 | 4,3330906 | 0,048639992 |
| 2205 | ENSG00000112146 | 0,125441701  | 5,736398094 | 1,1326769 | 0,29816004  |
| 2206 | ENSG00000112159 | 0,006378568  | 6,848674717 | 0,0017582 | 0,966913506 |
| 2207 | ENSG00000112183 | 0,277402819  | 7,039718559 | 0,7920075 | 0,382663743 |
| 2208 | ENSG00000112186 | 0,222398692  | 6,12098675  | 1,0449626 | 0,317251128 |
| 2209 | ENSG00000112200 | 0,076612349  | 6,491060323 | 0,2068197 | 0,653514263 |
| 2210 | ENSG00000112208 | -0,352509975 | 5,176770369 | 3,3978777 | 0,07814161  |
| 2211 | ENSG00000112210 | 0,497979182  | 4,176422159 | 4,9459212 | 0,036202247 |
| 2212 | ENSG00000112234 | 0,019737357  | 5,800462063 | 0,0210253 | 0,885962824 |
| 2213 | ENSG00000112237 | -0,03412853  | 5,25385251  | 0,039038  | 0,845100737 |
| 2214 | ENSG00000112242 | 0,054827863  | 3,593834574 | 0,1360919 | 0,800363469 |
| 2215 | ENSG00000112249 | -0,010570506 | 6,558744181 | 0,0045965 | 0,946529785 |
| 2216 | ENSG00000112276 | -0,202165405 | 5,882414572 | 0,5824735 | 0,45306454  |
| 2217 | ENSG00000112282 | 0,001019945  | 5,204946435 | 6,752E-05 | 0,99351389  |
| 2218 | ENSG00000112294 | 0,286894189  | 4,713917858 | 2,36637   | 0,137554068 |
| 2219 | ENSG00000112297 | -0,05555152  | 4,142128724 | 0,0376141 | 0,847914476 |
| 2220 | ENSG00000112304 | -0,507625251 | 4,998376229 | 13,58435  | 0,001211824 |
| 2221 | ENSG00000112305 | -0,102793654 | 3,720417638 | 0,6419423 | 0,57675898  |
| 2222 | ENSG00000112306 | 0,203432062  | 8,261619715 | 0,6043872 | 0,444794    |
| 2223 | ENSG00000112308 | 0,257396304  | 6,49218693  | 2,8564319 | 0,104449801 |
| 2224 | ENSG00000112319 | 0,337863048  | 4,672237937 | 0,6403865 | 0,43171976  |
| 2225 | ENSG00000112320 | 0,005386303  | 4,673426334 | 0,001111  | 0,973695864 |
| 2226 | ENSG00000112335 | -0,203003488 | 7,061932939 | 2,0894509 | 0,161696507 |
| 2227 | ENSG00000112339 | -0,339108983 | 6,196934075 | 2,7552391 | 0,110445074 |
| 2228 | ENSG00000112343 | 0,208727029  | 4,853298269 | 0,8721594 | 0,360012906 |
| 2229 | ENSG00000112367 | -0,049529258 | 4,085360412 | 0,1955938 | 0,823365612 |
| 2230 | ENSG00000112378 | -0,246699158 | 6,39934602  | 1,9280419 | 0,178210553 |
| 2231 | ENSG00000112379 | 0,774854668  | 4,326664238 | 3,8373793 | 0,062293892 |
| 2232 | ENSG00000112406 | -0,223575514 | 6,061627316 | 1,5690431 | 0,22287223  |
| 2233 | ENSG00000112414 | 1,021444344  | 4,624210832 | 5,2270282 | 0,031726918 |
| 2234 | ENSG00000112419 | 0,240474686  | 6,919684289 | 1,9523959 | 0,175599577 |
| 2235 | ENSG00000112425 | -0,154805089 | 5,33437476  | 0,8877546 | 0,355831348 |
| 2236 | ENSG00000112473 | 0,015853047  | 5,970216851 | 0,0179741 | 0,894505732 |
| 2237 | ENSG00000112511 | 0,056663178  | 5,331557245 | 0,161132  | 0,691793998 |
| 2238 | ENSG00000112514 | 0,07133617   | 5,031159448 | 0,1948554 | 0,663007961 |
| 2239 | ENSG00000112531 | -0,109364804 | 8,775451663 | 0,3517319 | 0,558873522 |
| 2240 | ENSG00000112541 | -0,417132298 | 4,674062702 | 1,5761903 | 0,221855119 |

|      |                 |              |             |           |              |
|------|-----------------|--------------|-------------|-----------|--------------|
| 2241 | ENSG00000112562 | 0,239213443  | 5,842488657 | 1,6861008 | 0,206922947  |
| 2242 | ENSG00000112576 | -0,128008114 | 4,932685887 | 0,5580391 | 0,462583686  |
| 2243 | ENSG00000112584 | 0,06898117   | 5,439159505 | 0,4071045 | 0,529692529  |
| 2244 | ENSG00000112624 | 0,275632929  | 4,906993776 | 3,0689433 | 0,093061313  |
| 2245 | ENSG00000112640 | 0,062839357  | 4,090776861 | 0,1297501 | 0,765396426  |
| 2246 | ENSG00000112658 | -0,0987092   | 5,945230792 | 0,2729036 | 0,606362136  |
| 2247 | ENSG00000112659 | 0,241478633  | 4,048576487 | 1,1828525 | 0,28798795   |
| 2248 | ENSG00000112679 | -0,417878583 | 5,34783026  | 11,933484 | 0,002135224  |
| 2249 | ENSG00000112685 | 0,059916593  | 5,241183541 | 0,208482  | 0,652207     |
| 2250 | ENSG00000112695 | -0,435003629 | 7,02611445  | 3,7562199 | 0,064921184  |
| 2251 | ENSG00000112697 | 0,069653535  | 7,105731579 | 0,1835382 | 0,672316163  |
| 2252 | ENSG00000112701 | 0,055601346  | 6,905753688 | 0,1622796 | 0,690755408  |
| 2253 | ENSG00000112715 | -0,201129753 | 6,923754007 | 0,62712   | 0,436466315  |
| 2254 | ENSG00000112739 | -0,067670137 | 6,325700041 | 0,2486196 | 0,622744572  |
| 2255 | ENSG00000112759 | 0,047657808  | 6,386729676 | 0,0759487 | 0,785313452  |
| 2256 | ENSG00000112763 | -0,120862148 | 4,536220182 | 1,1292543 | 0,349247458  |
| 2257 | ENSG00000112769 | 0,517707177  | 7,43666227  | 4,0558366 | 0,055802425  |
| 2258 | ENSG00000112773 | -0,022247935 | 6,284713162 | 0,0255698 | 0,874340192  |
| 2259 | ENSG00000112782 | 0,060124582  | 7,803831873 | 0,0591032 | 0,810063708  |
| 2260 | ENSG00000112837 | 1,793704814  | 4,857795856 | 12,313388 | 0,001875997  |
| 2261 | ENSG00000112851 | 0,017114077  | 7,159870422 | 0,0112311 | 0,916515036  |
| 2262 | ENSG00000112855 | 0,005370256  | 4,722141228 | 0,0020771 | 0,99760122   |
| 2263 | ENSG00000112874 | -0,478238951 | 4,729589745 | 3,4728548 | 0,075138156  |
| 2264 | ENSG00000112893 | 0,124057557  | 5,422135315 | 0,4483178 | 0,509769043  |
| 2265 | ENSG00000112902 | 0,017523761  | 6,206309642 | 0,016077  | 0,900195305  |
| 2266 | ENSG00000112936 | 0,601135732  | 9,569112652 | 3,6196102 | 0,069634067  |
| 2267 | ENSG00000112941 | 0,171202416  | 4,267416532 | 1,1093696 | 0,303106193  |
| 2268 | ENSG00000112964 | 0,07913739   | 5,760612918 | 0,0722382 | 0,790489989  |
| 2269 | ENSG00000112972 | -0,16551121  | 4,920815019 | 1,0883111 | 0,307635027  |
| 2270 | ENSG00000112977 | 0,3317955    | 5,339302845 | 3,9726062 | 0,058180492  |
| 2271 | ENSG00000112983 | 0,151856125  | 5,062763683 | 1,5528961 | 0,225148731  |
| 2272 | ENSG00000112992 | -0,262580041 | 8,487416557 | 0,9151112 | 0,348661635  |
| 2273 | ENSG00000112996 | -0,160251069 | 5,977416696 | 1,1024243 | 0,30458982   |
| 2274 | ENSG00000113013 | -0,19936178  | 8,203764501 | 1,3218231 | 0,261991264  |
| 2275 | ENSG00000113048 | -0,063528718 | 5,990358624 | 0,3061569 | 0,585342756  |
| 2276 | ENSG00000113068 | -0,179599895 | 5,239435608 | 1,7829988 | 0,194739472  |
| 2277 | ENSG00000113070 | 0,579364824  | 4,778588441 | 3,40674   | 0,0777779518 |
| 2278 | ENSG00000113083 | 0,818375864  | 5,115752211 | 4,3979273 | 0,047118896  |
| 2279 | ENSG00000113140 | 0,739228005  | 9,115339324 | 6,4519551 | 0,018259552  |
| 2280 | ENSG00000113141 | 0,013929627  | 6,166330016 | 0,0099372 | 0,921451105  |
| 2281 | ENSG00000113161 | 0,023206083  | 4,490335183 | 0,0229158 | 0,880989664  |
| 2282 | ENSG00000113163 | 0,123367157  | 5,958234931 | 0,8962502 | 0,353548669  |
| 2283 | ENSG00000113194 | 0,061100819  | 5,133927384 | 0,2850434 | 0,598494692  |
| 2284 | ENSG00000113231 | 0,441889249  | 4,536592954 | 2,8895985 | 0,102573494  |
| 2285 | ENSG00000113240 | -0,193927596 | 5,47359642  | 1,1787196 | 0,288811137  |
| 2286 | ENSG00000113269 | -0,091624748 | 5,667411512 | 0,4205808 | 0,523021037  |
| 2287 | ENSG00000113273 | 0,335434687  | 4,44087989  | 4,1824462 | 0,05239322   |
| 2288 | ENSG00000113282 | -0,204717465 | 6,368397999 | 3,0353502 | 0,094715995  |
| 2289 | ENSG00000113296 | 0,257108662  | 5,647751858 | 1,0620535 | 0,313411552  |
| 2290 | ENSG00000113300 | 0,031975756  | 4,994280468 | 0,0714668 | 0,791575741  |
| 2291 | ENSG00000113312 | -0,423758514 | 5,863381306 | 5,6951882 | 0,025581693  |
| 2292 | ENSG00000113318 | 0,359107782  | 4,828119455 | 4,934528  | 0,036398003  |
| 2293 | ENSG00000113319 | -0,462371618 | 4,681654338 | 6,2782489 | 0,019706936  |
| 2294 | ENSG00000113328 | -0,221326347 | 6,739034998 | 0,8837374 | 0,35690182   |
| 2295 | ENSG00000113360 | 0,097098036  | 5,207209902 | 0,8321641 | 0,439610246  |
| 2296 | ENSG00000113369 | -0,014418761 | 6,31398647  | 0,0026394 | 0,959468364  |
| 2297 | ENSG00000113384 | 0,020769827  | 5,508623765 | 0,0290376 | 0,866169878  |
| 2298 | ENSG00000113387 | -0,23556039  | 7,280726254 | 0,7024317 | 0,410551674  |
| 2299 | ENSG00000113389 | 2,475951894  | 5,635222488 | 30,250428 | 1,33872E-05  |



|      |                 |              |             |           |             |
|------|-----------------|--------------|-------------|-----------|-------------|
| 2300 | ENSG00000113391 | 0,003074907  | 5,027310456 | 0,0005006 | 0,982340658 |
| 2301 | ENSG00000113396 | -1,423561261 | 5,865392766 | 31,817966 | 9,49025E-06 |
| 2302 | ENSG00000113407 | -0,147609247 | 6,145012285 | 0,8075767 | 0,378104643 |
| 2303 | ENSG00000113441 | 0,011523201  | 8,044200991 | 0,0069478 | 0,93428583  |
| 2304 | ENSG00000113448 | -0,719156446 | 6,850856434 | 8,0244132 | 0,009404525 |
| 2305 | ENSG00000113456 | -0,65228949  | 5,079108138 | 25,793645 | 3,74789E-05 |
| 2306 | ENSG00000113460 | -0,267460838 | 4,205565903 | 2,4518184 | 0,130978806 |
| 2307 | ENSG00000113504 | 0,008805999  | 5,520633678 | 0,0021155 | 0,963709636 |
| 2308 | ENSG00000113532 | 0,04226716   | 4,043831356 | 0,023012  | 0,88074218  |
| 2309 | ENSG00000113552 | 0,036927688  | 4,470454072 | 0,1167326 | 0,794757118 |
| 2310 | ENSG00000113555 | -0,022875313 | 4,125228658 | 0,019819  | 0,889263558 |
| 2311 | ENSG00000113558 | -0,134482574 | 7,693795983 | 0,6000777 | 0,446401232 |
| 2312 | ENSG00000113569 | -0,045102791 | 5,268895517 | 0,170429  | 0,822385736 |
| 2313 | ENSG00000113575 | 0,000671695  | 6,814912791 | 2,104E-05 | 0,996379025 |
| 2314 | ENSG00000113578 | 0,395991926  | 5,805841139 | 2,52296   | 0,125786916 |
| 2315 | ENSG00000113580 | 0,229743438  | 6,936680576 | 2,8970609 | 0,102109092 |
| 2316 | ENSG00000113583 | -0,113306592 | 5,415802958 | 0,4949276 | 0,488764522 |
| 2317 | ENSG00000113593 | 0,123351087  | 5,175315546 | 0,7332452 | 0,400613943 |
| 2318 | ENSG00000113594 | -0,1714307   | 7,799877928 | 0,7305737 | 0,401470491 |
| 2319 | ENSG00000113595 | -0,151196213 | 5,205524525 | 0,4982282 | 0,487333944 |
| 2320 | ENSG00000113597 | -0,410057383 | 4,901661161 | 2,929696  | 0,100352364 |
| 2321 | ENSG00000113615 | 0,29895506   | 5,073034816 | 3,453004  | 0,075920255 |
| 2322 | ENSG00000113621 | -0,260675712 | 5,927626873 | 6,6638963 | 0,016624928 |
| 2323 | ENSG00000113638 | -0,131118855 | 5,075273456 | 0,3767442 | 0,545345138 |
| 2324 | ENSG00000113643 | -0,132689663 | 6,153108999 | 0,3118978 | 0,58188853  |
| 2325 | ENSG00000113648 | -0,262981783 | 6,332104577 | 4,299149  | 0,049417912 |
| 2326 | ENSG00000113649 | -0,225065399 | 5,62462369  | 2,8692609 | 0,103675106 |
| 2327 | ENSG00000113657 | 0,207307554  | 7,199526101 | 0,4731262 | 0,498397964 |
| 2328 | ENSG00000113658 | -0,026749426 | 6,470174163 | 0,0242601 | 0,877577352 |
| 2329 | ENSG00000113712 | -0,148319358 | 6,782257984 | 1,5564446 | 0,224636321 |
| 2330 | ENSG00000113716 | 0,006200227  | 4,851228813 | 0,0013742 | 0,970747645 |
| 2331 | ENSG00000113719 | 0,029208149  | 6,153902377 | 0,0460011 | 0,832048299 |
| 2332 | ENSG00000113721 | -0,028688352 | 6,601374219 | 0,0117259 | 0,914703224 |
| 2333 | ENSG00000113732 | -0,187248214 | 6,42659258  | 1,7628747 | 0,197189017 |
| 2334 | ENSG00000113739 | -1,131222762 | 4,331531915 | 19,094574 | 0,00022189  |
| 2335 | ENSG00000113742 | 0,068701506  | 7,462180106 | 0,081865  | 0,777334649 |
| 2336 | ENSG00000113749 | -0,811354771 | 4,077489701 | 7,1884273 | 0,013304723 |
| 2337 | ENSG00000113758 | -0,560806284 | 4,460187136 | 4,3544022 | 0,048133979 |
| 2338 | ENSG00000113790 | -0,137197755 | 4,259452454 | 0,433369  | 0,516844744 |
| 2339 | ENSG00000113810 | 0,44439886   | 4,675363179 | 4,5589861 | 0,043567254 |
| 2340 | ENSG00000113811 | -0,424742508 | 5,942655012 | 2,9053429 | 0,101694606 |
| 2341 | ENSG00000113812 | -0,174708399 | 5,100533769 | 1,0763205 | 0,310254784 |
| 2342 | ENSG00000113845 | -0,50453204  | 6,457292991 | 6,8022213 | 0,015686179 |
| 2343 | ENSG00000113851 | -0,140502336 | 6,019961999 | 0,4211109 | 0,522779655 |
| 2344 | ENSG00000113916 | -0,834209546 | 5,93100484  | 9,5556175 | 0,005134556 |
| 2345 | ENSG00000113971 | 0,117020391  | 3,850427022 | 0,4749853 | 0,497563733 |
| 2346 | ENSG00000114019 | 0,544726793  | 5,334814105 | 3,3839301 | 0,078715403 |
| 2347 | ENSG00000114021 | -0,311464004 | 5,217576889 | 7,8309692 | 0,010159143 |
| 2348 | ENSG00000114023 | -0,483081677 | 6,226793828 | 6,3014091 | 0,019506793 |
| 2349 | ENSG00000114030 | -0,069769208 | 5,857866979 | 0,3644565 | 0,551900749 |
| 2350 | ENSG00000114054 | 0,055024971  | 5,851920288 | 0,076155  | 0,785029778 |
| 2351 | ENSG00000114062 | -0,036493545 | 7,108447227 | 0,0809498 | 0,778539218 |
| 2352 | ENSG00000114098 | -0,289487341 | 5,791252435 | 4,7931362 | 0,038891484 |
| 2353 | ENSG00000114107 | -0,171859577 | 5,350919769 | 0,7993857 | 0,380493212 |
| 2354 | ENSG00000114120 | -0,245015901 | 7,065940343 | 1,3146625 | 0,263284138 |
| 2355 | ENSG00000114125 | -0,009930444 | 4,988685668 | 0,0077131 | 0,996319027 |
| 2356 | ENSG00000114126 | 0,133245858  | 6,326378864 | 1,5556365 | 0,224752888 |
| 2357 | ENSG00000114127 | -0,00224073  | 6,655233766 | 0,000222  | 0,988239018 |
| 2358 | ENSG00000114166 | -0,236695129 | 6,484290839 | 1,95334   | 0,175499304 |

|      |                 |              |             |           |             |
|------|-----------------|--------------|-------------|-----------|-------------|
| 2359 | ENSG00000114200 | 0,461446926  | 4,766291634 | 0,9255607 | 0,345976981 |
| 2360 | ENSG00000114209 | -0,317377462 | 5,10922128  | 2,3108933 | 0,142033261 |
| 2361 | ENSG00000114279 | -0,558039501 | 8,49357504  | 1,370244  | 0,253698195 |
| 2362 | ENSG00000114302 | -0,021268901 | 6,000843538 | 0,030986  | 0,861799565 |
| 2363 | ENSG00000114315 | 1,096904232  | 4,303819532 | 12,998222 | 0,00148202  |
| 2364 | ENSG00000114316 | 0,020557741  | 5,483059939 | 0,0300969 | 0,863775752 |
| 2365 | ENSG00000114331 | 0,106778171  | 6,115536923 | 0,4195517 | 0,523543411 |
| 2366 | ENSG00000114346 | -0,348313143 | 3,610438585 | 2,7806996 | 0,108900744 |
| 2367 | ENSG00000114353 | 0,064256835  | 6,59813378  | 0,1554088 | 0,697032973 |
| 2368 | ENSG00000114354 | -0,030948322 | 6,118237615 | 0,0740765 | 0,787899501 |
| 2369 | ENSG00000114374 | 0,105438964  | 6,431634071 | 0,0464356 | 0,831276181 |
| 2370 | ENSG00000114378 | -0,633677781 | 4,364933376 | 7,7926099 | 0,010341233 |
| 2371 | ENSG00000114383 | -0,273112551 | 4,226676791 | 5,0387408 | 0,079958261 |
| 2372 | ENSG00000114391 | 0,05385091   | 7,884832684 | 0,1093649 | 0,743837267 |
| 2373 | ENSG00000114416 | -0,198047546 | 7,333209755 | 1,4065078 | 0,24768622  |
| 2374 | ENSG00000114423 | -0,549450538 | 6,394333704 | 8,4369517 | 0,007960306 |
| 2375 | ENSG00000114439 | 0,128538162  | 6,715241517 | 1,7819773 | 0,194862772 |
| 2376 | ENSG00000114446 | 0,288282125  | 4,684860302 | 2,6987442 | 0,113964257 |
| 2377 | ENSG00000114450 | 0,089425326  | 5,559683488 | 0,1925708 | 0,664860362 |
| 2378 | ENSG00000114480 | -0,061585176 | 6,225851429 | 0,1038694 | 0,750131842 |
| 2379 | ENSG00000114491 | 0,130399594  | 3,86639552  | 1,1556854 | 0,453252523 |
| 2380 | ENSG00000114503 | 0,093279774  | 5,30329722  | 0,8660602 | 0,361634154 |
| 2381 | ENSG00000114520 | -0,104415392 | 4,792193023 | 0,2320813 | 0,634515009 |
| 2382 | ENSG00000114541 | 0,150616303  | 6,090724343 | 0,4888579 | 0,491414127 |
| 2383 | ENSG00000114544 | 0,063719105  | 4,645052516 | 0,1412682 | 0,710451246 |
| 2384 | ENSG00000114554 | -0,202230823 | 4,662545756 | 0,7350568 | 0,400051879 |
| 2385 | ENSG00000114573 | 0,027242396  | 5,505584276 | 0,0307943 | 0,862228324 |
| 2386 | ENSG00000114648 | -0,157506563 | 4,121806624 | 1,4262581 | 0,29846644  |
| 2387 | ENSG00000114650 | 0,075301051  | 4,798989905 | 0,1374156 | 0,714239661 |
| 2388 | ENSG00000114686 | -0,332687426 | 5,476777443 | 2,5385284 | 0,124683382 |
| 2389 | ENSG00000114698 | 0,732921215  | 5,763864809 | 5,5674763 | 0,027114629 |
| 2390 | ENSG00000114735 | 0,039603928  | 4,132586483 | 0,0544423 | 0,882259503 |
| 2391 | ENSG00000114738 | -0,307855616 | 7,094459343 | 2,0697808 | 0,163648056 |
| 2392 | ENSG00000114739 | 0,207887387  | 4,751607064 | 1,5524328 | 0,225258854 |
| 2393 | ENSG00000114742 | 0,103533498  | 5,568448573 | 0,5067336 | 0,483674065 |
| 2394 | ENSG00000114744 | -0,019831723 | 4,660490313 | 0,0122875 | 0,912693201 |
| 2395 | ENSG00000114745 | 0,062423404  | 4,885917046 | 0,2161744 | 0,740807642 |
| 2396 | ENSG00000114770 | -0,403052699 | 6,608652877 | 2,5238382 | 0,125724359 |
| 2397 | ENSG00000114779 | 0,403721673  | 4,085743327 | 4,1448827 | 0,053379427 |
| 2398 | ENSG00000114784 | -0,245930715 | 6,686753881 | 1,4371878 | 0,242742329 |
| 2399 | ENSG00000114790 | 0,465643507  | 3,767477385 | 1,9058928 | 0,180626376 |
| 2400 | ENSG00000114796 | 0,003839396  | 7,946948709 | 0,0002358 | 0,987881227 |
| 2401 | ENSG00000114841 | 0,226491793  | 3,770280641 | 0,6645317 | 0,423285696 |
| 2402 | ENSG00000114850 | -0,141869488 | 7,240927837 | 0,5675594 | 0,458836364 |
| 2403 | ENSG00000114853 | 0,502472681  | 5,598581231 | 5,9662835 | 0,022637614 |
| 2404 | ENSG00000114854 | -0,21761668  | 9,96683425  | 0,4721307 | 0,498845668 |
| 2405 | ENSG00000114857 | -0,273408365 | 7,3229263   | 2,9304541 | 0,100310911 |
| 2406 | ENSG00000114861 | -0,077832769 | 6,031275562 | 0,2251647 | 0,639585207 |
| 2407 | ENSG00000114867 | -0,092274229 | 7,342200566 | 0,1899331 | 0,667015609 |
| 2408 | ENSG00000114902 | -0,113379855 | 5,19084922  | 0,578253  | 0,454683465 |
| 2409 | ENSG00000114904 | 0,270097545  | 4,247824677 | 6,0570476 | 0,079509184 |
| 2410 | ENSG00000114923 | -0,147836093 | 7,891803182 | 0,3534529 | 0,557940502 |
| 2411 | ENSG00000114933 | 0,028918103  | 5,983700657 | 0,0856573 | 0,772374652 |
| 2412 | ENSG00000114942 | 0,191844237  | 7,346720551 | 0,8636315 | 0,362329285 |
| 2413 | ENSG00000114948 | -0,234300513 | 5,685186491 | 0,9630767 | 0,336574565 |
| 2414 | ENSG00000114978 | 0,064014289  | 6,6546616   | 0,1723316 | 0,68187628  |
| 2415 | ENSG00000114982 | 0,149735315  | 5,818240322 | 0,9373861 | 0,342973877 |
| 2416 | ENSG00000114988 | 0,081590309  | 4,347703873 | 0,3190406 | 0,651659636 |
| 2417 | ENSG00000114999 | -0,248407107 | 5,697227172 | 4,3901153 | 0,047259406 |

|      |                 |              |             |           |             |
|------|-----------------|--------------|-------------|-----------|-------------|
| 2418 | ENSG00000115020 | -0,041406373 | 6,244676068 | 0,1004773 | 0,754093182 |
| 2419 | ENSG00000115042 | -0,087976821 | 4,504319583 | 0,3513311 | 0,559104074 |
| 2420 | ENSG00000115053 | 0,161664943  | 7,550679209 | 1,8395294 | 0,188063274 |
| 2421 | ENSG00000115073 | 0,148221824  | 5,333019967 | 0,9763161 | 0,333338592 |
| 2422 | ENSG00000115084 | 0,301905287  | 7,039929641 | 2,0336126 | 0,167222334 |
| 2423 | ENSG00000115091 | 0,013452149  | 7,04125255  | 0,0048171 | 0,945264031 |
| 2424 | ENSG00000115109 | 0,066374745  | 5,344699584 | 0,4038541 | 0,531326086 |
| 2425 | ENSG00000115128 | -0,215007324 | 5,209997117 | 0,7583287 | 0,392807296 |
| 2426 | ENSG00000115137 | -0,405156956 | 4,343227622 | 9,4352535 | 0,006276898 |
| 2427 | ENSG00000115145 | -0,139192431 | 5,865216421 | 0,6510672 | 0,427956892 |
| 2428 | ENSG00000115159 | -0,124007192 | 5,193051081 | 0,6212799 | 0,438581952 |
| 2429 | ENSG00000115170 | 0,100600625  | 4,961725109 | 0,4485872 | 0,509643139 |
| 2430 | ENSG00000115183 | 0,151041806  | 7,047614942 | 1,1345346 | 0,297773418 |
| 2431 | ENSG00000115204 | 0,036211231  | 4,601337588 | 0,1102653 | 0,791910812 |
| 2432 | ENSG00000115207 | 0,078872444  | 4,248667647 | 0,2639028 | 0,70005839  |
| 2433 | ENSG00000115211 | -0,231802333 | 4,335481506 | 3,2549571 | 0,116135981 |
| 2434 | ENSG00000115216 | 0,085382304  | 5,788341681 | 0,5806327 | 0,453743832 |
| 2435 | ENSG00000115233 | -0,486587408 | 5,733902511 | 4,8878391 | 0,037212707 |
| 2436 | ENSG00000115234 | 0,194684215  | 5,625001072 | 2,0986049 | 0,160819025 |
| 2437 | ENSG00000115239 | -0,015380036 | 4,357682707 | 0,0116065 | 0,993524372 |
| 2438 | ENSG00000115241 | -0,185349716 | 5,120832123 | 1,7517396 | 0,198564586 |
| 2439 | ENSG00000115252 | 0,764591337  | 4,554366527 | 7,1828747 | 0,013335986 |
| 2440 | ENSG00000115267 | 0,325317429  | 3,924961078 | 2,3072227 | 0,142335701 |
| 2441 | ENSG00000115268 | 0,111448522  | 6,498926817 | 0,3112693 | 0,582266664 |
| 2442 | ENSG00000115271 | -0,126653996 | 4,624008723 | 0,1710292 | 0,68301089  |
| 2443 | ENSG00000115275 | 0,144192425  | 4,112050235 | 0,6158042 | 0,440580397 |
| 2444 | ENSG00000115295 | 0,059202442  | 6,752611673 | 0,1511312 | 0,701013746 |
| 2445 | ENSG00000115306 | 0,344732353  | 9,942150777 | 2,5252034 | 0,125580033 |
| 2446 | ENSG00000115307 | -0,170258034 | 5,357283988 | 1,0292125 | 0,32084671  |
| 2447 | ENSG00000115310 | -0,342138268 | 8,002162925 | 6,3161179 | 0,019352803 |
| 2448 | ENSG00000115355 | -0,061005479 | 6,582726457 | 0,3747182 | 0,546398358 |
| 2449 | ENSG00000115364 | -0,047628558 | 5,730889527 | 0,2075949 | 0,652895997 |
| 2450 | ENSG00000115365 | -0,140555395 | 6,396502701 | 0,5769137 | 0,455202358 |
| 2451 | ENSG00000115368 | -0,288835404 | 5,32029041  | 2,3556166 | 0,138409013 |
| 2452 | ENSG00000115380 | 1,67968162   | 7,797983854 | 11,431818 | 0,002561361 |
| 2453 | ENSG00000115392 | -0,087932205 | 4,389507817 | 0,2252204 | 0,639544004 |
| 2454 | ENSG00000115414 | 1,039457141  | 9,769688041 | 11,546364 | 0,002458503 |
| 2455 | ENSG00000115415 | 0,472912958  | 6,720901561 | 5,6777091 | 0,025785671 |
| 2456 | ENSG00000115419 | 0,515629041  | 7,272001654 | 3,5074215 | 0,073798203 |
| 2457 | ENSG00000115421 | 0,003234075  | 4,587910935 | 0,0007086 | 0,978990668 |
| 2458 | ENSG00000115446 | 0,06568892   | 4,570337305 | 0,2828788 | 0,599878417 |
| 2459 | ENSG00000115457 | 0,674471644  | 5,965131756 | 4,0426353 | 0,056172143 |
| 2460 | ENSG00000115459 | 0,419153098  | 4,241584045 | 3,3077581 | 0,081935803 |
| 2461 | ENSG00000115461 | -0,19194713  | 8,332696761 | 0,2740346 | 0,605621406 |
| 2462 | ENSG00000115464 | -0,065460017 | 7,709819291 | 0,1863889 | 0,669925963 |
| 2463 | ENSG00000115484 | -0,058908085 | 6,20586407  | 0,2548457 | 0,618446487 |
| 2464 | ENSG00000115486 | 0,091098846  | 5,189834441 | 0,2568503 | 0,617093402 |
| 2465 | ENSG00000115504 | -0,012100125 | 5,713424304 | 0,0034582 | 0,953611944 |
| 2466 | ENSG00000115514 | -0,282522284 | 4,644328389 | 1,2825637 | 0,269035353 |
| 2467 | ENSG00000115520 | -0,137265365 | 5,134001393 | 0,5011718 | 0,486064116 |
| 2468 | ENSG00000115524 | -0,131662761 | 8,407089089 | 0,6349521 | 0,433626134 |
| 2469 | ENSG00000115525 | 0,010597264  | 4,35539092  | 0,0011167 | 0,973628988 |
| 2470 | ENSG00000115526 | 0,149839971  | 3,735976175 | 0,5982618 | 0,492750137 |
| 2471 | ENSG00000115539 | -0,223020887 | 3,963925874 | 2,2268853 | 0,223474713 |
| 2472 | ENSG00000115540 | -0,576391701 | 5,230255633 | 4,0683019 | 0,055455848 |
| 2473 | ENSG00000115541 | -0,424269922 | 4,76414609  | 4,3924494 | 0,047245312 |
| 2474 | ENSG00000115548 | -0,034620264 | 6,319890387 | 0,085221  | 0,77293811  |
| 2475 | ENSG00000115561 | -0,006043936 | 6,01173119  | 0,0028391 | 0,957962613 |
| 2476 | ENSG00000115593 | -0,622183881 | 7,182672859 | 5,2138205 | 0,031922748 |

|      |                 |              |             |           |             |
|------|-----------------|--------------|-------------|-----------|-------------|
| 2477 | ENSG00000115594 | 0,428233766  | 6,654581629 | 1,6080737 | 0,217388277 |
| 2478 | ENSG00000115641 | 0,965914587  | 6,545055458 | 7,027174  | 0,014246601 |
| 2479 | ENSG00000115648 | -0,084001353 | 5,99824416  | 0,0930207 | 0,763101066 |
| 2480 | ENSG00000115649 | -0,046641369 | 4,913246607 | 0,099476  | 0,755286276 |
| 2481 | ENSG00000115652 | -0,074155046 | 4,4967121   | 0,5083326 | 0,559582432 |
| 2482 | ENSG00000115677 | 0,141158247  | 8,631184352 | 1,1633396 | 0,291863732 |
| 2483 | ENSG00000115685 | -0,043738606 | 5,355189465 | 0,1264226 | 0,725383724 |
| 2484 | ENSG00000115694 | -0,066752955 | 5,34923126  | 0,1999959 | 0,658882323 |
| 2485 | ENSG00000115738 | 1,048613166  | 5,91965427  | 8,7031436 | 0,007158993 |
| 2486 | ENSG00000115750 | 0,037270408  | 3,694037204 | 0,0492215 | 0,835980126 |
| 2487 | ENSG00000115758 | 0,579312305  | 5,720686871 | 8,6494796 | 0,0073131   |
| 2488 | ENSG00000115760 | -0,012648088 | 8,087234733 | 0,0090514 | 0,925021555 |
| 2489 | ENSG00000115761 | -0,133028354 | 4,608497175 | 2,0953974 | 0,342671106 |
| 2490 | ENSG00000115762 | -0,196078455 | 5,88746351  | 4,0017788 | 0,057291973 |
| 2491 | ENSG00000115806 | 0,077310436  | 5,397849408 | 0,5042337 | 0,553249262 |
| 2492 | ENSG00000115808 | 0,286292794  | 6,720422452 | 2,4209143 | 0,133312926 |
| 2493 | ENSG00000115816 | -0,148367464 | 5,461011803 | 0,3716839 | 0,548035067 |
| 2494 | ENSG00000115825 | 0,135803647  | 5,817580887 | 0,7829862 | 0,385342498 |
| 2495 | ENSG00000115827 | 0,114265937  | 4,289446874 | 0,8222418 | 0,374003119 |
| 2496 | ENSG00000115839 | 0,003042412  | 6,584504733 | 0,0006971 | 0,979161408 |
| 2497 | ENSG00000115840 | -0,42577293  | 6,988293992 | 3,7393959 | 0,06548148  |
| 2498 | ENSG00000115866 | -0,170135199 | 6,291267483 | 0,9456293 | 0,340902119 |
| 2499 | ENSG00000115875 | -0,152311514 | 6,10480569  | 0,9861455 | 0,330969566 |
| 2500 | ENSG00000115896 | 0,218410779  | 5,875919017 | 2,6073393 | 0,119893342 |
| 2501 | ENSG00000115904 | 0,148268798  | 5,997163185 | 0,923333  | 0,346546864 |
| 2502 | ENSG00000115935 | 0,084043136  | 5,208436518 | 0,2901277 | 0,595288961 |
| 2503 | ENSG00000115942 | -0,06427019  | 5,1560023   | 0,2236123 | 0,640723694 |
| 2504 | ENSG00000115944 | -0,154922865 | 6,050136531 | 1,7592822 | 0,197627257 |
| 2505 | ENSG00000115946 | -0,24301229  | 3,768591159 | 3,4426407 | 0,201366723 |
| 2506 | ENSG00000115947 | -0,26983081  | 5,420026759 | 2,4583005 | 0,130495386 |
| 2507 | ENSG00000115956 | -0,544868764 | 4,535770578 | 3,501119  | 0,074040461 |
| 2508 | ENSG00000115963 | -0,157462933 | 5,54947067  | 0,3696915 | 0,549101132 |
| 2509 | ENSG00000115966 | -0,005123889 | 5,851646036 | 0,0006811 | 0,979403581 |
| 2510 | ENSG00000115970 | -0,053221883 | 5,830469562 | 0,1806696 | 0,674715878 |
| 2511 | ENSG00000115977 | 0,106797002  | 6,770185241 | 0,2556415 | 0,617918529 |
| 2512 | ENSG00000115993 | 0,160291628  | 7,826351627 | 0,6559927 | 0,426238854 |
| 2513 | ENSG00000116001 | -0,115824598 | 6,28262488  | 0,4591028 | 0,504770258 |
| 2514 | ENSG00000116005 | 0,043902723  | 6,849746516 | 0,1225081 | 0,729488437 |
| 2515 | ENSG00000116016 | 0,156835762  | 7,917400298 | 0,6317574 | 0,43479784  |
| 2516 | ENSG00000116030 | -0,246579112 | 5,962789237 | 2,2576138 | 0,146499626 |
| 2517 | ENSG00000116044 | 0,340737763  | 6,7814364   | 4,2387423 | 0,050953571 |
| 2518 | ENSG00000116062 | 0,008531499  | 5,312119187 | 0,0065897 | 0,935997852 |
| 2519 | ENSG00000116095 | 0,144427327  | 5,816395674 | 1,6898953 | 0,206385948 |
| 2520 | ENSG00000116096 | -0,048640197 | 4,445773859 | 0,0603468 | 0,808116986 |
| 2521 | ENSG00000116106 | 0,005695765  | 6,8990206   | 0,0005034 | 0,982291917 |
| 2522 | ENSG00000116117 | 0,280609256  | 5,148629965 | 2,6702495 | 0,115789003 |
| 2523 | ENSG00000116120 | -0,287195514 | 5,176079705 | 6,5058667 | 0,017807672 |
| 2524 | ENSG00000116127 | 0,135238782  | 6,192038236 | 1,3943995 | 0,249631482 |
| 2525 | ENSG00000116128 | 0,15073167   | 4,018348944 | 0,4014934 | 0,532539902 |
| 2526 | ENSG00000116132 | -0,533996433 | 6,357958001 | 7,3987102 | 0,012178366 |
| 2527 | ENSG00000116133 | 0,188894619  | 4,893436962 | 0,1743322 | 0,680143167 |
| 2528 | ENSG00000116138 | -0,089167187 | 4,826137985 | 0,729383  | 0,459207689 |
| 2529 | ENSG00000116141 | -0,140848413 | 4,808318997 | 0,975088  | 0,333625471 |
| 2530 | ENSG00000116161 | -0,438211666 | 5,413070854 | 8,2568536 | 0,008558317 |
| 2531 | ENSG00000116171 | -0,116009124 | 6,9190737   | 0,4416425 | 0,512907175 |
| 2532 | ENSG00000116191 | -0,568219689 | 4,841866143 | 13,064065 | 0,001449203 |
| 2533 | ENSG00000116194 | -0,36657179  | 4,641688866 | 2,2521649 | 0,146965797 |
| 2534 | ENSG00000116198 | 0,251428818  | 4,383031008 | 2,839006  | 0,107491209 |
| 2535 | ENSG00000116199 | -0,020516245 | 6,568869241 | 0,0538993 | 0,81844826  |

|      |                 |              |             |           |             |
|------|-----------------|--------------|-------------|-----------|-------------|
| 2536 | ENSG00000116205 | 0,217770522  | 3,664808083 | 3,3109422 | 0,259572242 |
| 2537 | ENSG00000116209 | -0,325866867 | 7,708961233 | 3,6944366 | 0,066997576 |
| 2538 | ENSG00000116212 | -0,184164752 | 3,966988062 | 1,9497069 | 0,280809412 |
| 2539 | ENSG00000116221 | -0,433859223 | 5,327099779 | 8,7785562 | 0,006938763 |
| 2540 | ENSG00000116237 | -0,399086616 | 6,551007911 | 7,5017852 | 0,011648468 |
| 2541 | ENSG00000116251 | 0,15120685   | 7,131085835 | 0,4976715 | 0,487574718 |
| 2542 | ENSG00000116260 | -0,415567089 | 6,770512244 | 2,7598547 | 0,110163221 |
| 2543 | ENSG00000116266 | -0,137437555 | 5,551334027 | 0,490214  | 0,49081999  |
| 2544 | ENSG00000116285 | 0,482892061  | 5,389499409 | 0,9706266 | 0,33472571  |
| 2545 | ENSG00000116288 | -0,309482603 | 6,934960954 | 3,6712093 | 0,067809498 |
| 2546 | ENSG00000116350 | -0,189051903 | 6,076277645 | 1,6684966 | 0,2092102   |
| 2547 | ENSG00000116353 | -0,172663868 | 3,942504124 | 1,0764406 | 0,310228373 |
| 2548 | ENSG00000116396 | 0,474112593  | 3,794222642 | 2,6751212 | 0,115474611 |
| 2549 | ENSG00000116406 | 0,085356404  | 5,885598715 | 0,3082131 | 0,584112504 |
| 2550 | ENSG00000116455 | -0,181859726 | 4,153055275 | 1,7269133 | 0,215954723 |
| 2551 | ENSG00000116459 | -0,625221752 | 8,236059631 | 6,6180763 | 0,016984983 |
| 2552 | ENSG00000116473 | -0,253698178 | 6,255968582 | 2,5659362 | 0,122768254 |
| 2553 | ENSG00000116478 | -0,005979738 | 5,066586214 | 0,0033182 | 0,954557655 |
| 2554 | ENSG00000116489 | -0,038195148 | 6,062192277 | 0,0441966 | 0,835330451 |
| 2555 | ENSG00000116497 | 0,097296042  | 4,575964124 | 0,4380201 | 0,514615313 |
| 2556 | ENSG00000116514 | 0,303156258  | 3,915927633 | 2,1826432 | 0,153072234 |
| 2557 | ENSG00000116521 | -0,171945818 | 4,78163101  | 1,1440941 | 0,295832708 |
| 2558 | ENSG00000116539 | 0,133087303  | 7,515025206 | 1,6807557 | 0,207575278 |
| 2559 | ENSG00000116560 | 0,094791572  | 7,491692526 | 0,3685724 | 0,549687291 |
| 2560 | ENSG00000116574 | 0,07946486   | 4,914981962 | 0,0485813 | 0,827485841 |
| 2561 | ENSG00000116580 | 0,113810333  | 5,966355483 | 0,8041331 | 0,379074165 |
| 2562 | ENSG00000116584 | 0,238346933  | 5,404460948 | 1,7227206 | 0,202228166 |
| 2563 | ENSG00000116604 | 0,162198032  | 5,686394961 | 0,552577  | 0,464756381 |
| 2564 | ENSG00000116641 | 0,045912609  | 5,643238633 | 0,1301491 | 0,721542468 |
| 2565 | ENSG00000116667 | -0,113583213 | 6,669712037 | 0,4428643 | 0,512330204 |
| 2566 | ENSG00000116668 | 0,188245623  | 4,407604271 | 0,7903428 | 0,383155975 |
| 2567 | ENSG00000116675 | 0,172195373  | 4,569369365 | 0,6065897 | 0,443976147 |
| 2568 | ENSG00000116678 | 1,275017437  | 5,430956589 | 8,6629074 | 0,0072742   |
| 2569 | ENSG00000116679 | 0,109368134  | 6,809890255 | 0,3100543 | 0,582999029 |
| 2570 | ENSG00000116685 | 0,021452243  | 4,782562051 | 0,0242279 | 0,974952205 |
| 2571 | ENSG00000116688 | 0,208471996  | 8,393869945 | 0,7705057 | 0,389094295 |
| 2572 | ENSG00000116698 | -0,008669079 | 5,661077343 | 0,0029727 | 0,95698744  |
| 2573 | ENSG00000116701 | -0,331423332 | 4,30618045  | 1,1081329 | 0,303369642 |
| 2574 | ENSG00000116704 | 0,294546523  | 4,227370541 | 4,5254489 | 0,046801124 |
| 2575 | ENSG00000116717 | 0,537188084  | 4,123251831 | 7,4173638 | 0,012083657 |
| 2576 | ENSG00000116729 | -0,067599682 | 5,910871182 | 0,3334303 | 0,569209648 |
| 2577 | ENSG00000116731 | 2,58028E-05  | 5,551532862 | 3,43E-08  | 0,999853812 |
| 2578 | ENSG00000116741 | 0,626539135  | 5,751107258 | 2,6763802 | 0,115393526 |
| 2579 | ENSG00000116747 | 0,087619885  | 6,715823295 | 0,2118291 | 0,649638252 |
| 2580 | ENSG00000116750 | -0,35187206  | 5,413733139 | 4,3486387 | 0,048270235 |
| 2581 | ENSG00000116752 | -0,308677    | 4,873812899 | 1,9908357 | 0,171572598 |
| 2582 | ENSG00000116754 | -0,123107177 | 6,971384779 | 0,6975566 | 0,412140543 |
| 2583 | ENSG00000116774 | 0,445204371  | 4,814366809 | 2,3516884 | 0,138722896 |
| 2584 | ENSG00000116786 | 0,036909893  | 5,572355799 | 0,0487354 | 0,82721704  |
| 2585 | ENSG00000116791 | -0,337397597 | 5,335411001 | 2,8448136 | 0,105122256 |
| 2586 | ENSG00000116793 | 0,201970943  | 3,9319903   | 2,0569142 | 0,221380125 |
| 2587 | ENSG00000116815 | -0,246873839 | 4,175913055 | 1,8326632 | 0,188904223 |
| 2588 | ENSG00000116830 | 0,128771777  | 4,082060969 | 0,6337911 | 0,457691768 |
| 2589 | ENSG00000116857 | 0,381725438  | 4,636475186 | 5,8906934 | 0,02341867  |
| 2590 | ENSG00000116871 | -0,217259864 | 6,825349855 | 1,3373812 | 0,259310094 |
| 2591 | ENSG00000116874 | 0,023799736  | 4,018876798 | 0,0374171 | 0,848302278 |
| 2592 | ENSG00000116898 | -0,465349531 | 5,44093184  | 12,051929 | 0,00204798  |
| 2593 | ENSG00000116903 | -0,098147564 | 4,790277672 | 0,6511495 | 0,444969293 |
| 2594 | ENSG00000116906 | -0,315763652 | 6,076550655 | 4,2745432 | 0,050061333 |

|      |                 |              |             |           |             |
|------|-----------------|--------------|-------------|-----------|-------------|
| 2595 | ENSG00000116918 | -0,252827426 | 5,105891396 | 2,0841099 | 0,162257586 |
| 2596 | ENSG00000116954 | 0,074274251  | 4,009205332 | 0,2793569 | 0,609321269 |
| 2597 | ENSG00000116962 | -0,961168792 | 6,44206926  | 11,448171 | 0,002546392 |
| 2598 | ENSG00000116977 | 0,280982801  | 6,391785077 | 2,4102839 | 0,134127193 |
| 2599 | ENSG00000116984 | 0,115475891  | 6,881550221 | 0,7840631 | 0,384989718 |
| 2600 | ENSG00000116991 | -0,198495066 | 6,846753954 | 0,8886269 | 0,355599528 |
| 2601 | ENSG00000117000 | 0,030524772  | 5,780087604 | 0,0298002 | 0,864447016 |
| 2602 | ENSG00000117020 | 0,194611882  | 6,366926644 | 1,8968273 | 0,18158784  |
| 2603 | ENSG00000117036 | 0,394725662  | 4,919644337 | 7,937272  | 0,009730579 |
| 2604 | ENSG00000117054 | -0,336601645 | 7,619435164 | 1,543965  | 0,226487954 |
| 2605 | ENSG00000117114 | -0,203715403 | 7,000538869 | 1,4817618 | 0,235782177 |
| 2606 | ENSG00000117118 | -0,645749229 | 7,063469737 | 9,9780506 | 0,004372154 |
| 2607 | ENSG00000117133 | -0,303657694 | 4,942986859 | 2,472465  | 0,129446358 |
| 2608 | ENSG00000117139 | 0,301054461  | 5,526178251 | 3,5679175 | 0,071518423 |
| 2609 | ENSG00000117143 | -0,845560604 | 6,297827837 | 8,1039215 | 0,009105117 |
| 2610 | ENSG00000117151 | 0,023501771  | 3,629558029 | 0,0176916 | 0,895337042 |
| 2611 | ENSG00000117153 | 0,037956939  | 5,095252544 | 0,1324679 | 0,729790041 |
| 2612 | ENSG00000117155 | 0,056385543  | 5,248087746 | 0,0566831 | 0,813915394 |
| 2613 | ENSG00000117174 | 0,116235475  | 4,479793993 | 1,170323  | 0,374628692 |
| 2614 | ENSG00000117222 | -0,049240526 | 4,435129401 | 0,2686124 | 0,748044392 |
| 2615 | ENSG00000117226 | 0,730106685  | 4,509836819 | 4,987399  | 0,035499491 |
| 2616 | ENSG00000117228 | 0,328394176  | 4,879506481 | 1,2174919 | 0,281209632 |
| 2617 | ENSG00000117262 | -0,270214094 | 4,86670386  | 4,2209921 | 0,051361713 |
| 2618 | ENSG00000117266 | -0,176376509 | 6,038159974 | 0,4694753 | 0,500043362 |
| 2619 | ENSG00000117280 | 0,106601602  | 4,364724951 | 0,5882584 | 0,487695846 |
| 2620 | ENSG00000117298 | 0,226839889  | 6,293064594 | 1,0166366 | 0,323757991 |
| 2621 | ENSG00000117305 | 0,124623322  | 4,558935533 | 0,8375447 | 0,372219795 |
| 2622 | ENSG00000117318 | 0,494393739  | 5,532775284 | 8,4127161 | 0,00803803  |
| 2623 | ENSG00000117335 | -0,129731086 | 7,268955035 | 0,5329035 | 0,472723371 |
| 2624 | ENSG00000117360 | 0,087360765  | 5,064511457 | 0,711074  | 0,443048978 |
| 2625 | ENSG00000117362 | 0,202908638  | 5,580916321 | 2,5028728 | 0,127180681 |
| 2626 | ENSG00000117394 | -0,436659948 | 3,693784015 | 3,7747475 | 0,064310465 |
| 2627 | ENSG00000117395 | -0,143745269 | 4,434172459 | 1,099784  | 0,330312964 |
| 2628 | ENSG00000117408 | -0,205832908 | 4,753527273 | 1,2840689 | 0,268762016 |
| 2629 | ENSG00000117410 | -0,077940649 | 5,049853492 | 0,3236931 | 0,574865121 |
| 2630 | ENSG00000117411 | 0,003507867  | 4,420965517 | 0,000428  | 0,983672432 |
| 2631 | ENSG00000117419 | -0,004032104 | 4,726516909 | 0,0012657 | 0,971924861 |
| 2632 | ENSG00000117448 | 0,061445471  | 5,166193145 | 0,1216266 | 0,730433875 |
| 2633 | ENSG00000117450 | -0,788265563 | 7,502893281 | 12,734382 | 0,001621915 |
| 2634 | ENSG00000117461 | -0,299707505 | 5,813191324 | 2,2832528 | 0,144329727 |
| 2635 | ENSG00000117475 | -0,265913005 | 5,240285933 | 0,9729414 | 0,334161697 |
| 2636 | ENSG00000117479 | -0,341648258 | 5,355907558 | 1,5414044 | 0,226861303 |
| 2637 | ENSG00000117481 | -0,128474584 | 4,08933152  | 0,8095811 | 0,379369834 |
| 2638 | ENSG00000117500 | 0,172183558  | 6,444411231 | 0,6594007 | 0,425056377 |
| 2639 | ENSG00000117505 | 0,089665787  | 5,789017489 | 0,613533  | 0,441385981 |
| 2640 | ENSG00000117519 | 0,069871353  | 6,826477784 | 0,1136067 | 0,739116251 |
| 2641 | ENSG00000117523 | 0,090056612  | 7,268705684 | 0,3421128 | 0,564268225 |
| 2642 | ENSG00000117525 | 0,488945926  | 5,19932966  | 5,9838886 | 0,022459894 |
| 2643 | ENSG00000117528 | -0,329980713 | 6,478608019 | 1,9985826 | 0,170774673 |
| 2644 | ENSG00000117533 | -0,039724733 | 4,580448692 | 0,0655067 | 0,800259182 |
| 2645 | ENSG00000117543 | -0,151429213 | 4,382694117 | 1,2699159 | 0,360203469 |
| 2646 | ENSG00000117569 | -0,450200193 | 5,344242818 | 7,1895598 | 0,013298357 |
| 2647 | ENSG00000117592 | -0,558830924 | 8,011972103 | 10,649535 | 0,003395523 |
| 2648 | ENSG00000117593 | -0,005034232 | 4,571757186 | 0,0024285 | 0,961118504 |
| 2649 | ENSG00000117595 | 0,403522751  | 4,514464063 | 3,8028839 | 0,063395494 |
| 2650 | ENSG00000117597 | 0,216339891  | 4,194542387 | 2,9921945 | 0,153836243 |
| 2651 | ENSG00000117614 | 0,04171856   | 5,362552621 | 0,056533  | 0,814157179 |
| 2652 | ENSG00000117616 | 0,451495673  | 5,907552623 | 5,3289102 | 0,030260691 |
| 2653 | ENSG00000117620 | 0,02041175   | 4,732299279 | 0,021018  | 0,885984163 |

|      |                 |              |             |           |             |
|------|-----------------|--------------|-------------|-----------|-------------|
| 2654 | ENSG00000117625 | -0,072854972 | 5,919223102 | 0,2072097 | 0,653210512 |
| 2655 | ENSG00000117632 | 0,418270245  | 4,223587    | 5,3254181 | 0,030309674 |
| 2656 | ENSG00000117640 | -0,210009895 | 6,116393791 | 1,4976103 | 0,233368877 |
| 2657 | ENSG00000117643 | 0,468228406  | 3,885992571 | 4,0768973 | 0,055218288 |
| 2658 | ENSG00000117682 | 0,135608408  | 4,626559529 | 0,7404112 | 0,398367438 |
| 2659 | ENSG00000117691 | -0,046729467 | 5,56133347  | 0,0767099 | 0,784268548 |
| 2660 | ENSG00000117697 | -0,16566292  | 5,148945209 | 1,8511792 | 0,190485792 |
| 2661 | ENSG00000117707 | -0,162803433 | 6,453392746 | 0,2668896 | 0,610334021 |
| 2662 | ENSG00000117713 | -0,022055729 | 5,493520684 | 0,0069228 | 0,934406025 |
| 2663 | ENSG00000117748 | 0,15303736   | 4,798261163 | 1,49525   | 0,239907085 |
| 2664 | ENSG00000117751 | -0,015535503 | 4,644120436 | 0,0161808 | 0,953703544 |
| 2665 | ENSG00000117758 | -0,124912573 | 5,414381902 | 0,7550634 | 0,393796346 |
| 2666 | ENSG00000117791 | -0,382674159 | 4,71372415  | 13,574428 | 0,003559451 |
| 2667 | ENSG00000117859 | -0,092050226 | 6,682478172 | 0,6303262 | 0,435283715 |
| 2668 | ENSG00000117868 | -0,026105148 | 7,295236509 | 0,0434284 | 0,836739902 |
| 2669 | ENSG00000117899 | -0,125307546 | 5,178747271 | 1,2627235 | 0,274712687 |
| 2670 | ENSG00000117906 | -0,021232613 | 5,394951612 | 0,0191938 | 0,89101227  |
| 2671 | ENSG00000117984 | 0,094561977  | 6,382588695 | 0,1397516 | 0,711935467 |
| 2672 | ENSG00000118007 | 0,084109841  | 6,046003797 | 0,4107197 | 0,527886461 |
| 2673 | ENSG00000118046 | 0,017217559  | 4,846919418 | 0,0147389 | 0,914303837 |
| 2674 | ENSG00000118058 | 0,335494789  | 6,537150891 | 2,9926752 | 0,096975599 |
| 2675 | ENSG00000118096 | 0,115906267  | 4,319347558 | 0,9196388 | 0,471196549 |
| 2676 | ENSG00000118181 | -0,01690293  | 8,45756883  | 0,0052774 | 0,942713143 |
| 2677 | ENSG00000118194 | -0,195382971 | 8,304066277 | 0,3566648 | 0,556170384 |
| 2678 | ENSG00000118197 | 0,069233424  | 4,156113303 | 0,2979197 | 0,59769198  |
| 2679 | ENSG00000118200 | -0,076902027 | 6,536539643 | 0,2040968 | 0,655645101 |
| 2680 | ENSG00000118217 | -0,055531944 | 6,096666651 | 0,2927555 | 0,593619352 |
| 2681 | ENSG00000118246 | -0,343108911 | 6,325289984 | 2,8714833 | 0,103595684 |
| 2682 | ENSG00000118257 | 0,509178039  | 4,559322343 | 4,3387396 | 0,048505281 |
| 2683 | ENSG00000118260 | -0,000624807 | 6,112414625 | 2,447E-05 | 0,99609553  |
| 2684 | ENSG00000118263 | -0,057877527 | 5,104517686 | 0,0830756 | 0,775740807 |
| 2685 | ENSG00000118276 | -0,540125453 | 3,571768314 | 9,2925956 | 0,006921433 |
| 2686 | ENSG00000118363 | -0,089815517 | 5,353158888 | 0,4581929 | 0,50516535  |
| 2687 | ENSG00000118407 | -0,151740336 | 7,328950985 | 0,2359714 | 0,631704444 |
| 2688 | ENSG00000118412 | -0,185024513 | 5,485683909 | 1,2517354 | 0,274714705 |
| 2689 | ENSG00000118418 | -0,447707101 | 6,354082253 | 4,8119916 | 0,038580229 |
| 2690 | ENSG00000118454 | 0,099826361  | 5,024250995 | 0,4012708 | 0,532652579 |
| 2691 | ENSG00000118473 | 0,355202979  | 4,013079325 | 4,1329614 | 0,053696795 |
| 2692 | ENSG00000118482 | 0,07275958   | 7,287842386 | 0,2111235 | 0,650177766 |
| 2693 | ENSG00000118495 | 0,23530559   | 4,746569674 | 1,4665108 | 0,238134584 |
| 2694 | ENSG00000118496 | -0,036004652 | 5,807865565 | 0,0533162 | 0,819421882 |
| 2695 | ENSG00000118503 | 1,112021062  | 4,669013005 | 5,9754935 | 0,022544446 |
| 2696 | ENSG00000118507 | 0,056272061  | 3,940445336 | 0,1243825 | 0,727525024 |
| 2697 | ENSG00000118515 | 0,644331795  | 6,395482116 | 2,2505872 | 0,147101098 |
| 2698 | ENSG00000118518 | -0,074268392 | 5,92631094  | 0,2229638 | 0,641218677 |
| 2699 | ENSG00000118523 | 1,134098069  | 7,316338266 | 5,5999862 | 0,026714914 |
| 2700 | ENSG00000118564 | -0,16903955  | 7,206399252 | 0,8360527 | 0,369968984 |
| 2701 | ENSG00000118579 | 0,096995091  | 5,181753746 | 0,4378803 | 0,514688931 |
| 2702 | ENSG00000118596 | -0,119877219 | 8,447885453 | 0,086946  | 0,770728532 |
| 2703 | ENSG00000118620 | 0,093270723  | 3,661378752 | 0,316209  | 0,605028215 |
| 2704 | ENSG00000118680 | 0,100636056  | 7,355320108 | 0,2723939 | 0,606696545 |
| 2705 | ENSG00000118689 | 0,12853152   | 6,427204763 | 0,5463757 | 0,467243538 |
| 2706 | ENSG00000118690 | 0,018166941  | 3,681466243 | 0,01174   | 0,940450404 |
| 2707 | ENSG00000118705 | -0,188001871 | 6,975635319 | 2,2813602 | 0,144441639 |
| 2708 | ENSG00000118729 | -0,392668894 | 10,04924254 | 1,0967436 | 0,305810619 |
| 2709 | ENSG00000118762 | 0,423905033  | 5,753005944 | 3,5032629 | 0,07395795  |
| 2710 | ENSG00000118785 | 0,954088593  | 4,471397105 | 4,5351135 | 0,044074112 |
| 2711 | ENSG00000118816 | 0,133796329  | 8,115111609 | 0,7953686 | 0,381640922 |
| 2712 | ENSG00000118849 | -0,260336493 | 4,985876269 | 0,247178  | 0,623765634 |

|      |                 |              |             |           |             |
|------|-----------------|--------------|-------------|-----------|-------------|
| 2713 | ENSG00000118855 | -0,107471519 | 5,734889371 | 0,3897319 | 0,538554279 |
| 2714 | ENSG00000118873 | 0,003029361  | 6,007004117 | 0,0009519 | 0,9756502   |
| 2715 | ENSG00000118898 | -0,563092559 | 4,312859823 | 2,365648  | 0,137611278 |
| 2716 | ENSG00000118900 | -0,008242536 | 5,103001813 | 0,0017963 | 0,966557443 |
| 2717 | ENSG00000118922 | 0,006931326  | 5,868306504 | 0,0029473 | 0,957169713 |
| 2718 | ENSG00000118946 | -0,258474515 | 3,816334089 | 1,4971828 | 0,233433555 |
| 2719 | ENSG00000118960 | 0,182230956  | 4,546871851 | 0,8651376 | 0,361918641 |
| 2720 | ENSG00000118961 | 0,002536602  | 3,867786217 | 0,0002851 | 0,986673543 |
| 2721 | ENSG00000118965 | 0,248286401  | 4,763765073 | 2,1840151 | 0,152948823 |
| 2722 | ENSG00000118971 | 0,270942094  | 8,24947848  | 1,8377661 | 0,188312503 |
| 2723 | ENSG00000118985 | -0,19699099  | 6,426326566 | 0,6895653 | 0,41480793  |
| 2724 | ENSG00000119004 | 0,216627994  | 4,177581607 | 2,7690417 | 0,14436482  |
| 2725 | ENSG00000119013 | -0,898454576 | 6,884161158 | 9,1021545 | 0,006119159 |
| 2726 | ENSG00000119041 | -0,23792037  | 5,471101854 | 1,7250795 | 0,201930311 |
| 2727 | ENSG00000119048 | -0,156573243 | 6,27799531  | 0,8113479 | 0,377012312 |
| 2728 | ENSG00000119138 | 0,108897141  | 6,658358117 | 0,8090495 | 0,377645399 |
| 2729 | ENSG00000119185 | 0,155795793  | 6,067461218 | 0,3099584 | 0,583056904 |
| 2730 | ENSG00000119203 | -0,14676695  | 4,498064776 | 1,2200795 | 0,374743825 |
| 2731 | ENSG00000119231 | 0,018868753  | 5,68857542  | 0,0359704 | 0,861439856 |
| 2732 | ENSG00000119242 | -0,308025058 | 4,951764647 | 3,1111611 | 0,090973383 |
| 2733 | ENSG00000119280 | 0,386269926  | 5,880125495 | 5,0009323 | 0,035273516 |
| 2734 | ENSG00000119285 | -0,017215525 | 5,305682006 | 0,0120565 | 0,913514021 |
| 2735 | ENSG00000119314 | 0,173816857  | 6,044500489 | 0,6297331 | 0,435524914 |
| 2736 | ENSG00000119318 | 0,056577282  | 6,784071633 | 0,2449825 | 0,625286755 |
| 2737 | ENSG00000119321 | -0,153225512 | 5,370004905 | 2,5378728 | 0,124682469 |
| 2738 | ENSG00000119326 | -0,223067014 | 6,933080504 | 1,7698208 | 0,196382425 |
| 2739 | ENSG00000119328 | 0,088094809  | 3,727585956 | 0,4183902 | 0,613674669 |
| 2740 | ENSG00000119335 | 0,032636972  | 7,526674857 | 0,0610048 | 0,807087953 |
| 2741 | ENSG00000119383 | -0,195471689 | 6,148149377 | 1,1446961 | 0,295708687 |
| 2742 | ENSG00000119392 | 0,074735698  | 4,573716947 | 0,4170374 | 0,590916667 |
| 2743 | ENSG00000119396 | 0,150303998  | 6,181069307 | 1,5794841 | 0,221344973 |
| 2744 | ENSG00000119397 | 0,315805619  | 5,052564027 | 2,8116339 | 0,107058218 |
| 2745 | ENSG00000119401 | -0,038463976 | 4,122161444 | 0,0714466 | 0,791609415 |
| 2746 | ENSG00000119402 | 0,021287151  | 6,119463239 | 0,031471  | 0,860733852 |
| 2747 | ENSG00000119403 | 0,119918988  | 3,868803657 | 0,3451147 | 0,562587519 |
| 2748 | ENSG00000119408 | 0,389313112  | 3,994867478 | 2,9652207 | 0,098431145 |
| 2749 | ENSG00000119414 | 0,058170443  | 5,779694981 | 0,2496562 | 0,622024263 |
| 2750 | ENSG00000119421 | -0,5142386   | 6,474004493 | 6,3667156 | 0,018954488 |
| 2751 | ENSG00000119446 | -0,252866216 | 5,454686469 | 1,4139986 | 0,246467294 |
| 2752 | ENSG00000119471 | 0,056189392  | 7,074474993 | 0,0732325 | 0,789089059 |
| 2753 | ENSG00000119487 | -0,130830302 | 5,922088341 | 1,8142338 | 0,191015245 |
| 2754 | ENSG00000119508 | 1,020842324  | 6,472870918 | 1,1161392 | 0,301669472 |
| 2755 | ENSG00000119509 | 0,119551988  | 4,501382471 | 0,5642462 | 0,460134814 |
| 2756 | ENSG00000119522 | 0,205267478  | 4,227410241 | 1,3478141 | 0,257511222 |
| 2757 | ENSG00000119523 | 0,077601064  | 4,321444435 | 0,388348  | 0,573946121 |
| 2758 | ENSG00000119537 | 0,102595743  | 5,610680338 | 0,8271683 | 0,372447243 |
| 2759 | ENSG00000119541 | 0,156620062  | 5,200489014 | 1,3656345 | 0,254434655 |
| 2760 | ENSG00000119596 | 0,129365455  | 6,017095095 | 0,7096744 | 0,408184982 |
| 2761 | ENSG00000119616 | 0,025346077  | 4,578213717 | 0,0516559 | 0,822197953 |
| 2762 | ENSG00000119638 | 0,139031607  | 6,712510928 | 0,9352503 | 0,343489184 |
| 2763 | ENSG00000119650 | 0,262149853  | 4,147324792 | 2,9901055 | 0,115819777 |
| 2764 | ENSG00000119655 | 0,116733565  | 5,974215654 | 0,456501  | 0,505968214 |
| 2765 | ENSG00000119661 | 0,365537146  | 4,384083466 | 8,7852294 | 0,008231272 |
| 2766 | ENSG00000119669 | -0,059783759 | 4,556097734 | 0,1118391 | 0,741075669 |
| 2767 | ENSG00000119673 | -0,122080809 | 5,488649391 | 0,6101211 | 0,442669831 |
| 2768 | ENSG00000119681 | 0,912506335  | 6,632947797 | 10,659125 | 0,003391608 |
| 2769 | ENSG00000119682 | -0,162311398 | 5,13340979  | 1,2931403 | 0,267106009 |
| 2770 | ENSG00000119684 | -0,242257736 | 5,631248361 | 4,4360144 | 0,046210818 |
| 2771 | ENSG00000119685 | 0,01780197   | 4,469710574 | 0,0208471 | 0,962617413 |



|      |                 |              |             |           |             |
|------|-----------------|--------------|-------------|-----------|-------------|
| 2772 | ENSG00000119688 | -0,059256413 | 4,450278256 | 0,0904429 | 0,766303446 |
| 2773 | ENSG00000119689 | -0,215673177 | 6,738660275 | 1,8877907 | 0,182630575 |
| 2774 | ENSG00000119699 | 0,212676545  | 4,999230014 | 1,4702831 | 0,237549943 |
| 2775 | ENSG00000119705 | -0,659177305 | 5,55161834  | 7,5988954 | 0,0112033   |
| 2776 | ENSG00000119707 | -0,078267371 | 6,552092992 | 0,3860355 | 0,540449692 |
| 2777 | ENSG00000119711 | 0,3933014    | 5,997079667 | 4,375323  | 0,047643018 |
| 2778 | ENSG00000119718 | -0,246530922 | 4,018827792 | 7,7488085 | 0,136576303 |
| 2779 | ENSG00000119720 | -0,158314957 | 4,37730228  | 0,9664287 | 0,335751966 |
| 2780 | ENSG00000119723 | -0,299104383 | 3,642133075 | 3,552053  | 0,114161991 |
| 2781 | ENSG00000119729 | -0,143529686 | 7,304443209 | 0,808468  | 0,377843176 |
| 2782 | ENSG00000119760 | 0,032775455  | 5,324946615 | 0,0840202 | 0,85458594  |
| 2783 | ENSG00000119772 | 0,276269505  | 4,565417211 | 2,6195567 | 0,119120739 |
| 2784 | ENSG00000119777 | 0,0517266    | 4,951264473 | 0,0988264 | 0,756062671 |
| 2785 | ENSG00000119778 | -0,031086209 | 5,533353634 | 0,0534751 | 0,81915095  |
| 2786 | ENSG00000119787 | 0,075648434  | 5,581052611 | 0,3675583 | 0,550226386 |
| 2787 | ENSG00000119801 | 0,121739391  | 6,010455276 | 0,5783878 | 0,45463393  |
| 2788 | ENSG00000119812 | -0,087588337 | 5,568212167 | 0,3670122 | 0,550532641 |
| 2789 | ENSG00000119820 | 0,038024242  | 6,184738557 | 0,1197462 | 0,732429201 |
| 2790 | ENSG00000119844 | 0,091218568  | 5,195099754 | 0,4410873 | 0,513151147 |
| 2791 | ENSG00000119862 | 0,186819948  | 4,622900607 | 2,0495761 | 0,1707808   |
| 2792 | ENSG00000119865 | 0,380556674  | 4,135954031 | 3,5659166 | 0,071592526 |
| 2793 | ENSG00000119878 | -0,239668157 | 4,705357626 | 2,9085847 | 0,103713989 |
| 2794 | ENSG00000119899 | 0,296462984  | 4,447144097 | 3,980615  | 0,057929563 |
| 2795 | ENSG00000119900 | 0,305530724  | 6,184074008 | 1,3067816 | 0,264681207 |
| 2796 | ENSG00000119906 | 0,139964876  | 6,091896098 | 0,8111502 | 0,37706945  |
| 2797 | ENSG00000119912 | -0,280678301 | 6,221333561 | 2,3451715 | 0,139245505 |
| 2798 | ENSG00000119917 | 0,315089263  | 4,699416948 | 1,5872003 | 0,220299685 |
| 2799 | ENSG00000119922 | 0,648075643  | 4,250811834 | 5,4643845 | 0,028426973 |
| 2800 | ENSG00000119927 | 0,099636718  | 8,405663456 | 0,0127675 | 0,911011367 |
| 2801 | ENSG00000119929 | -0,407094119 | 4,467565692 | 6,7811866 | 0,01582882  |
| 2802 | ENSG00000119938 | -0,646948238 | 7,802916241 | 5,3546016 | 0,029903023 |
| 2803 | ENSG00000119950 | 0,017027264  | 5,945303879 | 0,0174237 | 0,896123715 |
| 2804 | ENSG00000119953 | 0,003060116  | 4,810646947 | 0,0007526 | 0,978348659 |
| 2805 | ENSG00000119977 | 0,308634257  | 4,543785602 | 6,6127318 | 0,027032494 |
| 2806 | ENSG00000119979 | 0,153353674  | 4,549365103 | 1,5257613 | 0,229116197 |
| 2807 | ENSG00000120008 | -0,035660525 | 5,663594512 | 0,0680807 | 0,79645628  |
| 2808 | ENSG00000120029 | 0,283259518  | 5,816831512 | 3,3192571 | 0,081440075 |
| 2809 | ENSG00000120049 | -1,059435252 | 7,450480757 | 12,838923 | 0,001564827 |
| 2810 | ENSG00000120053 | -0,548707079 | 8,247616378 | 4,0040967 | 0,057267468 |
| 2811 | ENSG00000120063 | -0,023252513 | 6,077309929 | 0,0207168 | 0,886800769 |
| 2812 | ENSG00000120071 | -0,278057949 | 6,157350587 | 1,9600949 | 0,174783889 |
| 2813 | ENSG00000120129 | 1,233433934  | 6,504073058 | 8,771526  | 0,006967776 |
| 2814 | ENSG00000120137 | 0,026023908  | 6,707127625 | 0,0237052 | 0,878973849 |
| 2815 | ENSG00000120156 | -0,514059873 | 5,628552888 | 13,07437  | 0,00144167  |
| 2816 | ENSG00000120159 | 0,124419703  | 3,961686651 | 0,6546094 | 0,445827867 |
| 2817 | ENSG00000120217 | 0,088751637  | 3,847422265 | 0,2535945 | 0,620730249 |
| 2818 | ENSG00000120253 | -0,178891559 | 4,981457508 | 2,6629474 | 0,144499709 |
| 2819 | ENSG00000120265 | -0,536447115 | 6,425092941 | 6,26691   | 0,019805754 |
| 2820 | ENSG00000120278 | -0,56225778  | 4,640137119 | 5,6752329 | 0,025814713 |
| 2821 | ENSG00000120279 | -0,292855646 | 4,766826312 | 3,2235539 | 0,085673629 |
| 2822 | ENSG00000120306 | 0,335837684  | 5,193291903 | 2,7588362 | 0,110225344 |
| 2823 | ENSG00000120314 | -0,013766661 | 3,933874512 | 0,0076402 | 0,93110003  |
| 2824 | ENSG00000120333 | -0,157605608 | 4,709908517 | 1,190796  | 0,286392767 |
| 2825 | ENSG00000120370 | 0,035576606  | 3,757305454 | 0,0914417 | 0,824896464 |
| 2826 | ENSG00000120438 | -0,282860538 | 6,848502698 | 5,4881175 | 0,028085645 |
| 2827 | ENSG00000120451 | 0,101181907  | 6,203031267 | 0,5025271 | 0,485463132 |
| 2828 | ENSG00000120457 | -0,674542375 | 3,952209645 | 3,3736125 | 0,079142976 |
| 2829 | ENSG00000120509 | -0,212601529 | 4,279379649 | 3,0437274 | 0,181333736 |
| 2830 | ENSG00000120519 | 0,04954361   | 3,483928966 | 0,110505  | 0,785155882 |

|      |                 |              |             |           |             |
|------|-----------------|--------------|-------------|-----------|-------------|
| 2831 | ENSG00000120526 | -0,138954373 | 4,670317262 | 0,3683272 | 0,549833406 |
| 2832 | ENSG00000120533 | -0,308803652 | 5,248025615 | 3,4750427 | 0,075052522 |
| 2833 | ENSG00000120549 | -0,49461076  | 5,490946289 | 4,3105617 | 0,049181452 |
| 2834 | ENSG00000120594 | 1,062541529  | 7,087659427 | 10,394136 | 0,003741053 |
| 2835 | ENSG00000120616 | -0,079492232 | 5,541154976 | 0,6064985 | 0,443982609 |
| 2836 | ENSG00000120656 | -0,185871011 | 3,928704309 | 2,0946022 | 0,318544776 |
| 2837 | ENSG00000120662 | -0,245854542 | 3,658261244 | 2,2028957 | 0,209368832 |
| 2838 | ENSG00000120675 | -0,648020353 | 5,866710321 | 6,8017582 | 0,015689305 |
| 2839 | ENSG00000120685 | -0,005447614 | 4,163366708 | 0,0020722 | 0,964081692 |
| 2840 | ENSG00000120686 | 0,125198529  | 5,891553546 | 0,3331553 | 0,569387212 |
| 2841 | ENSG00000120688 | -0,386995394 | 4,939368268 | 6,8807015 | 0,015166419 |
| 2842 | ENSG00000120690 | 0,116548668  | 5,548237277 | 0,5185771 | 0,478669162 |
| 2843 | ENSG00000120693 | 0,949336428  | 4,248267484 | 8,1038403 | 0,009105417 |
| 2844 | ENSG00000120694 | 0,131813102  | 6,210169295 | 0,2475601 | 0,623499006 |
| 2845 | ENSG00000120696 | 0,212220249  | 4,009531979 | 2,1256794 | 0,187956862 |
| 2846 | ENSG00000120697 | -0,091517188 | 3,994483167 | 0,3425653 | 0,655433687 |
| 2847 | ENSG00000120699 | -0,259849345 | 4,38109641  | 2,6236395 | 0,118848271 |
| 2848 | ENSG00000120705 | -0,096605586 | 6,844829129 | 0,6411615 | 0,431416742 |
| 2849 | ENSG00000120708 | -0,586571666 | 6,467125043 | 8,2230499 | 0,008675989 |
| 2850 | ENSG00000120709 | 0,12272377   | 4,64296258  | 0,9744237 | 0,438061735 |
| 2851 | ENSG00000120725 | -0,089966326 | 4,417612581 | 0,2901119 | 0,595298937 |
| 2852 | ENSG00000120727 | -0,058228694 | 5,630841285 | 0,2290657 | 0,636698332 |
| 2853 | ENSG00000120729 | -0,124004347 | 4,752566287 | 0,0616928 | 0,806033694 |
| 2854 | ENSG00000120733 | 0,389243037  | 6,410370487 | 4,5939792 | 0,04283611  |
| 2855 | ENSG00000120738 | 0,872879304  | 6,60219873  | 2,7833995 | 0,108738463 |
| 2856 | ENSG00000120742 | 0,521045734  | 6,093709529 | 2,9852134 | 0,097368708 |
| 2857 | ENSG00000120784 | 0,025261705  | 4,104118461 | 0,0328637 | 0,876169611 |
| 2858 | ENSG00000120798 | -0,106370446 | 5,193406513 | 0,4986199 | 0,487164637 |
| 2859 | ENSG00000120800 | 0,015164765  | 5,281986005 | 0,0248127 | 0,876197923 |
| 2860 | ENSG00000120802 | 0,185103729  | 5,226349137 | 0,9546389 | 0,338657776 |
| 2861 | ENSG00000120805 | -0,125108185 | 6,599254542 | 0,3768337 | 0,545297838 |
| 2862 | ENSG00000120820 | 0,666481738  | 4,146651533 | 7,0516342 | 0,014099099 |
| 2863 | ENSG00000120832 | -0,120149577 | 4,404337749 | 0,9307169 | 0,428981703 |
| 2864 | ENSG00000120833 | -0,034858235 | 4,421254003 | 0,0397719 | 0,843671302 |
| 2865 | ENSG00000120837 | 0,029181538  | 5,419807202 | 0,0285666 | 0,867254065 |
| 2866 | ENSG00000120860 | -0,326564909 | 4,851822099 | 4,8985355 | 0,037022649 |
| 2867 | ENSG00000120868 | 0,480231489  | 4,165750197 | 6,1005012 | 0,021321177 |
| 2868 | ENSG00000120885 | -0,221579104 | 7,732353083 | 0,4166992 | 0,524945913 |
| 2869 | ENSG00000120889 | 0,284493465  | 4,619543194 | 1,7152423 | 0,203176068 |
| 2870 | ENSG00000120899 | 0,232558725  | 4,050863581 | 0,7005789 | 0,411160452 |
| 2871 | ENSG00000120910 | -0,146855301 | 4,984047797 | 1,8716432 | 0,19330995  |
| 2872 | ENSG00000120915 | 0,113621232  | 4,736177454 | 0,3994946 | 0,533553191 |
| 2873 | ENSG00000120925 | 0,085079137  | 4,667140281 | 0,5654076 | 0,459652686 |
| 2874 | ENSG00000120937 | 0,94317667   | 9,467380194 | 5,5258252 | 0,027636521 |
| 2875 | ENSG00000120948 | -0,050982656 | 5,632248133 | 0,1800201 | 0,675265578 |
| 2876 | ENSG00000120963 | -0,053017856 | 5,219583711 | 0,1834284 | 0,690572727 |
| 2877 | ENSG00000120992 | -0,351071589 | 5,686583835 | 2,2330682 | 0,148613624 |
| 2878 | ENSG00000121022 | -0,531061397 | 6,210978442 | 9,2302971 | 0,005821393 |
| 2879 | ENSG00000121039 | -0,085012246 | 4,949578487 | 0,0371065 | 0,84893093  |
| 2880 | ENSG00000121057 | -0,125827406 | 6,792137722 | 0,3597106 | 0,55450187  |
| 2881 | ENSG00000121058 | -0,12591136  | 3,793910714 | 0,9402839 | 0,515096452 |
| 2882 | ENSG00000121060 | 0,043853252  | 4,910628756 | 0,0577241 | 0,812248076 |
| 2883 | ENSG00000121064 | -0,062641792 | 5,669595953 | 0,1434218 | 0,708359165 |
| 2884 | ENSG00000121067 | 0,056377516  | 5,651238683 | 0,3463524 | 0,613658314 |
| 2885 | ENSG00000121073 | -0,360179443 | 5,333454289 | 7,3013246 | 0,012663585 |
| 2886 | ENSG00000121210 | 0,186498409  | 4,973713999 | 1,9284639 | 0,178119129 |
| 2887 | ENSG00000121274 | 0,193619477  | 4,102972375 | 1,5872219 | 0,220296652 |
| 2888 | ENSG00000121289 | 0,291575196  | 3,740388002 | 4,0417156 | 0,136243631 |
| 2889 | ENSG00000121310 | 0,100924161  | 6,238677299 | 0,3538308 | 0,557731708 |

|      |                 |              |             |           |             |
|------|-----------------|--------------|-------------|-----------|-------------|
| 2890 | ENSG00000121316 | 0,154752582  | 4,96840501  | 1,0164662 | 0,323797675 |
| 2891 | ENSG00000121350 | -0,157983694 | 4,466448772 | 0,8716446 | 0,360152126 |
| 2892 | ENSG00000121361 | -0,056227985 | 4,573289984 | 0,1645656 | 0,688706528 |
| 2893 | ENSG00000121390 | -0,179904478 | 5,140243005 | 3,2871797 | 0,082786073 |
| 2894 | ENSG00000121406 | 0,086833577  | 3,716221323 | 0,4114884 | 0,676256366 |
| 2895 | ENSG00000121413 | 0,284869952  | 4,512813772 | 2,7944338 | 0,108078164 |
| 2896 | ENSG00000121417 | 0,056185597  | 4,322039388 | 0,1561168 | 0,732297147 |
| 2897 | ENSG00000121440 | -0,316087272 | 5,429095537 | 2,6013074 | 0,120347645 |
| 2898 | ENSG00000121481 | -0,018675785 | 4,159657505 | 0,0119017 | 0,914068671 |
| 2899 | ENSG00000121486 | -0,018227791 | 4,983560764 | 0,020029  | 0,990192425 |
| 2900 | ENSG00000121542 | -0,075669546 | 3,886633441 | 0,3346241 | 0,722527736 |
| 2901 | ENSG00000121577 | -0,19514329  | 7,871432673 | 0,7825351 | 0,385477156 |
| 2902 | ENSG00000121578 | 0,255513582  | 4,375029635 | 2,334108  | 0,14013809  |
| 2903 | ENSG00000121579 | -0,074250066 | 6,261174058 | 0,2420919 | 0,627338736 |
| 2904 | ENSG00000121644 | 0,041073003  | 5,493087057 | 0,0691526 | 0,79490458  |
| 2905 | ENSG00000121671 | 0,176814592  | 6,393527283 | 0,7755824 | 0,387561672 |
| 2906 | ENSG00000121691 | 0,315696257  | 6,666552759 | 1,9552201 | 0,175299828 |
| 2907 | ENSG00000121741 | -0,109508921 | 7,194495379 | 0,5581888 | 0,462504452 |
| 2908 | ENSG00000121743 | -0,385253651 | 3,673697747 | 1,700054  | 0,205118274 |
| 2909 | ENSG00000121749 | -0,034292323 | 5,613504472 | 0,0468799 | 0,830483852 |
| 2910 | ENSG00000121766 | -0,09916889  | 4,815535899 | 0,3602461 | 0,554209519 |
| 2911 | ENSG00000121769 | -0,307044289 | 10,0522566  | 1,0664837 | 0,312426648 |
| 2912 | ENSG00000121774 | 0,105191399  | 6,159471043 | 0,9799177 | 0,332434396 |
| 2913 | ENSG00000121851 | -0,105769982 | 4,512632303 | 0,4548621 | 0,551305288 |
| 2914 | ENSG00000121858 | -0,116405307 | 5,257490656 | 0,2024818 | 0,656917089 |
| 2915 | ENSG00000121864 | -0,152746022 | 5,034687369 | 1,4442111 | 0,241586353 |
| 2916 | ENSG00000121879 | -0,014112807 | 6,139479632 | 0,0083751 | 0,927871696 |
| 2917 | ENSG00000121892 | -0,015008411 | 6,736820137 | 0,0107284 | 0,918395622 |
| 2918 | ENSG00000121897 | -0,24858827  | 4,2244687   | 2,1052055 | 0,160236378 |
| 2919 | ENSG00000121898 | 0,658529895  | 4,494021931 | 5,6466165 | 0,026153012 |
| 2920 | ENSG00000121931 | -0,26939838  | 4,075969202 | 2,2676862 | 0,145642558 |
| 2921 | ENSG00000121940 | 0,065466994  | 4,810100309 | 0,5150225 | 0,592489079 |
| 2922 | ENSG00000121957 | -0,791927633 | 4,321052524 | 12,546537 | 0,001730304 |
| 2923 | ENSG00000121964 | 0,011542351  | 5,582287236 | 0,0116483 | 0,91498163  |
| 2924 | ENSG00000121988 | -0,05531667  | 3,479243227 | 0,1034035 | 0,79484405  |
| 2925 | ENSG00000121989 | 0,090345695  | 4,733892163 | 0,4441586 | 0,511697527 |
| 2926 | ENSG00000122008 | -0,129950007 | 5,626990434 | 0,5461508 | 0,467334127 |
| 2927 | ENSG00000122026 | -0,022642222 | 8,043597851 | 0,0118735 | 0,914170204 |
| 2928 | ENSG00000122033 | -0,774091659 | 5,734744899 | 24,145435 | 5,7032E-05  |
| 2929 | ENSG00000122034 | -0,605088748 | 6,512661395 | 26,565744 | 3,10747E-05 |
| 2930 | ENSG00000122042 | 0,085647463  | 5,769543397 | 0,3671802 | 0,550435016 |
| 2931 | ENSG00000122068 | -0,062190689 | 6,587638853 | 0,1017414 | 0,752614564 |
| 2932 | ENSG00000122085 | -0,094283965 | 4,197877047 | 0,7693994 | 0,516366199 |
| 2933 | ENSG00000122126 | -0,2806288   | 4,94439678  | 5,0532627 | 0,034379    |
| 2934 | ENSG00000122176 | 1,489766592  | 6,243191547 | 23,815964 | 6,20154E-05 |
| 2935 | ENSG00000122203 | -0,001876735 | 5,937176864 | 0,0003144 | 0,986005302 |
| 2936 | ENSG00000122218 | 0,283119987  | 7,429942702 | 8,5703327 | 0,007529996 |
| 2937 | ENSG00000122257 | 0,095020673  | 5,867070837 | 0,5082232 | 0,483020322 |
| 2938 | ENSG00000122299 | 0,076304621  | 5,573337807 | 0,4417379 | 0,512839291 |
| 2939 | ENSG00000122335 | 0,090714448  | 3,645003038 | 0,3608805 | 0,615308901 |
| 2940 | ENSG00000122359 | -0,187531421 | 7,642241803 | 0,8848759 | 0,356597985 |
| 2941 | ENSG00000122367 | -0,283405195 | 9,530638985 | 0,7176149 | 0,405613983 |
| 2942 | ENSG00000122376 | -0,283276113 | 5,329296581 | 1,9991083 | 0,170720681 |
| 2943 | ENSG00000122378 | -0,468660728 | 6,514030846 | 5,7559869 | 0,024886068 |
| 2944 | ENSG00000122406 | 0,178971049  | 8,910800019 | 0,6288849 | 0,435830149 |
| 2945 | ENSG00000122417 | 0,179620068  | 4,952161114 | 0,85899   | 0,363599026 |
| 2946 | ENSG00000122420 | -1,103623532 | 4,324797221 | 11,428589 | 0,002564327 |
| 2947 | ENSG00000122435 | -0,07918792  | 4,418092419 | 0,3035104 | 0,636587467 |
| 2948 | ENSG00000122477 | -0,642914686 | 6,581178301 | 2,7814719 | 0,108854293 |

|      |                 |              |             |           |             |
|------|-----------------|--------------|-------------|-----------|-------------|
| 2949 | ENSG00000122482 | -0,235365406 | 6,472620762 | 1,2562563 | 0,27387207  |
| 2950 | ENSG00000122483 | 0,182179503  | 3,764472564 | 1,3000126 | 0,294005032 |
| 2951 | ENSG00000122484 | 0,028708328  | 5,39287038  | 0,0843997 | 0,774003022 |
| 2952 | ENSG00000122507 | 0,231026424  | 4,921773472 | 3,8872829 | 0,060695799 |
| 2953 | ENSG00000122512 | 0,100376761  | 4,027022516 | 1,0299632 | 0,568475389 |
| 2954 | ENSG00000122545 | -0,002896032 | 7,834999909 | 0,0001741 | 0,989584397 |
| 2955 | ENSG00000122550 | -0,487935617 | 6,711541459 | 3,8687498 | 0,061310965 |
| 2956 | ENSG00000122557 | 0,26501704   | 4,588271321 | 5,7603622 | 0,04676339  |
| 2957 | ENSG00000122565 | -0,18115051  | 6,337549853 | 1,0151738 | 0,32409896  |
| 2958 | ENSG00000122566 | -0,253965925 | 8,382252066 | 4,4767543 | 0,045302037 |
| 2959 | ENSG00000122591 | -0,100918274 | 6,179359305 | 0,2653545 | 0,611357006 |
| 2960 | ENSG00000122642 | 0,122173815  | 6,555456083 | 0,5534744 | 0,464398255 |
| 2961 | ENSG00000122643 | -0,116265983 | 4,412492499 | 0,4412703 | 0,513083153 |
| 2962 | ENSG00000122644 | -0,154459048 | 4,110664544 | 0,4833584 | 0,493836211 |
| 2963 | ENSG00000122674 | 0,174597474  | 5,58732477  | 1,2210914 | 0,280517433 |
| 2964 | ENSG00000122679 | -0,246848437 | 4,563545373 | 0,9339583 | 0,343840585 |
| 2965 | ENSG00000122692 | -0,063001642 | 6,018604401 | 0,3770868 | 0,545143177 |
| 2966 | ENSG00000122696 | -0,059430348 | 3,595830427 | 0,2029257 | 0,749100737 |
| 2967 | ENSG00000122705 | 0,056356945  | 5,236620687 | 0,1247015 | 0,727190666 |
| 2968 | ENSG00000122707 | 0,222673645  | 4,438684284 | 1,6422947 | 0,212718804 |
| 2969 | ENSG00000122729 | -0,025169252 | 6,294435205 | 0,0200289 | 0,888682782 |
| 2970 | ENSG00000122741 | -0,060079054 | 5,270941214 | 0,1887689 | 0,667961147 |
| 2971 | ENSG00000122779 | -0,088302589 | 4,80359695  | 0,6686723 | 0,478670399 |
| 2972 | ENSG00000122786 | 0,204402893  | 8,463636553 | 1,1420032 | 0,296240765 |
| 2973 | ENSG00000122861 | -1,174100971 | 4,466614747 | 10,445928 | 0,003669764 |
| 2974 | ENSG00000122862 | -0,366963816 | 6,372030833 | 1,0801484 | 0,309415166 |
| 2975 | ENSG00000122863 | 0,234037411  | 5,027114778 | 1,4307069 | 0,243776059 |
| 2976 | ENSG00000122870 | 0,412669683  | 5,710630834 | 2,0353524 | 0,167048246 |
| 2977 | ENSG00000122873 | -0,655303588 | 6,282198483 | 5,7351232 | 0,025122374 |
| 2978 | ENSG00000122882 | -0,097391004 | 4,733767714 | 0,7555461 | 0,489814033 |
| 2979 | ENSG00000122884 | -0,233748871 | 6,252895897 | 1,0934866 | 0,306513531 |
| 2980 | ENSG00000122912 | 0,23553632   | 5,050554132 | 2,1276454 | 0,158119586 |
| 2981 | ENSG00000122958 | -0,000516815 | 5,498190109 | 1,086E-05 | 0,997398577 |
| 2982 | ENSG00000122965 | -0,097935869 | 4,330763694 | 0,3358006 | 0,567869186 |
| 2983 | ENSG00000122970 | 0,062183544  | 4,337891994 | 0,2131504 | 0,648610168 |
| 2984 | ENSG00000123066 | 0,008371034  | 7,038689181 | 0,0025293 | 0,960322004 |
| 2985 | ENSG00000123080 | 0,114491125  | 3,845058823 | 0,3568752 | 0,556054807 |
| 2986 | ENSG00000123091 | -0,041774548 | 6,651659467 | 0,0750336 | 0,786576526 |
| 2987 | ENSG00000123094 | 0,072622957  | 6,511168357 | 0,1196435 | 0,732550176 |
| 2988 | ENSG00000123095 | 0,722370579  | 4,405991598 | 24,581225 | 5,0747E-05  |
| 2989 | ENSG00000123096 | 0,075936024  | 6,619345784 | 0,1235723 | 0,72837637  |
| 2990 | ENSG00000123104 | 0,094514674  | 6,87819258  | 0,2628377 | 0,613042338 |
| 2991 | ENSG00000123106 | -0,018093595 | 5,562118558 | 0,0136498 | 0,908002222 |
| 2992 | ENSG00000123119 | -0,302140647 | 5,091475144 | 1,2653876 | 0,27218041  |
| 2993 | ENSG00000123124 | -0,218014833 | 6,614634127 | 3,7336111 | 0,065631836 |
| 2994 | ENSG00000123130 | -0,136421159 | 6,029511656 | 1,1056918 | 0,303853036 |
| 2995 | ENSG00000123131 | 0,210577461  | 5,307344607 | 1,5239877 | 0,22942144  |
| 2996 | ENSG00000123143 | -0,087333707 | 5,81670109  | 0,1556249 | 0,696833533 |
| 2997 | ENSG00000123144 | -0,079780369 | 5,238697377 | 0,3548488 | 0,557149793 |
| 2998 | ENSG00000123146 | -0,032206749 | 4,416994053 | 0,0193002 | 0,890712643 |
| 2999 | ENSG00000123159 | 0,022617505  | 4,65878209  | 0,015734  | 0,90126357  |
| 3000 | ENSG00000123178 | -0,193944069 | 4,000142087 | 1,9485647 | 0,26460592  |
| 3001 | ENSG00000123191 | 0,62511986   | 4,014164152 | 12,602762 | 0,001697053 |
| 3002 | ENSG00000123200 | 0,182333711  | 6,225882902 | 4,2064315 | 0,051733317 |
| 3003 | ENSG00000123213 | -0,10036866  | 4,236825874 | 0,8858936 | 0,555961091 |
| 3004 | ENSG00000123240 | -0,076098492 | 7,035329108 | 0,4629336 | 0,50299199  |
| 3005 | ENSG00000123243 | 0,446187106  | 5,059811594 | 3,1601574 | 0,088617787 |
| 3006 | ENSG00000123268 | 0,21129665   | 4,199997194 | 1,8678979 | 0,184864531 |
| 3007 | ENSG00000123338 | -0,205806045 | 4,569982072 | 0,6567633 | 0,425971028 |

|      |                 |              |             |           |             |
|------|-----------------|--------------|-------------|-----------|-------------|
| 3008 | ENSG00000123349 | 0,11051735   | 7,295704955 | 0,3627915 | 0,552823916 |
| 3009 | ENSG00000123352 | 0,228611483  | 3,616953483 | 1,8563609 | 0,250543962 |
| 3010 | ENSG00000123358 | 0,941408666  | 6,301310729 | 4,1300027 | 0,053775891 |
| 3011 | ENSG00000123384 | 0,103138662  | 8,325230097 | 0,0763104 | 0,784816268 |
| 3012 | ENSG00000123416 | -0,144850473 | 6,156318198 | 0,4814449 | 0,494683781 |
| 3013 | ENSG00000123472 | -0,104677938 | 7,03469489  | 0,5097167 | 0,482394024 |
| 3014 | ENSG00000123505 | -0,378783461 | 6,633104653 | 5,5270246 | 0,027621336 |
| 3015 | ENSG00000123545 | -0,520344726 | 5,726423736 | 3,4273355 | 0,076945446 |
| 3016 | ENSG00000123552 | -0,160216891 | 5,039160968 | 0,9022446 | 0,352007949 |
| 3017 | ENSG00000123560 | -0,983033255 | 4,479372339 | 14,474763 | 0,000906794 |
| 3018 | ENSG00000123562 | -0,12486102  | 7,331369259 | 0,3239849 | 0,574713078 |
| 3019 | ENSG00000123570 | -0,215175067 | 5,407535121 | 0,4823569 | 0,494279513 |
| 3020 | ENSG00000123575 | -0,027490985 | 5,426712378 | 0,0476014 | 0,829199103 |
| 3021 | ENSG00000123595 | -0,016186881 | 4,147650583 | 0,0110417 | 0,962256014 |
| 3022 | ENSG00000123600 | 0,174614378  | 4,003030027 | 1,2509165 | 0,279124428 |
| 3023 | ENSG00000123607 | -0,156631034 | 5,378433367 | 1,2665171 | 0,27194404  |
| 3024 | ENSG00000123636 | -0,036059819 | 6,81913043  | 0,0908029 | 0,765843911 |
| 3025 | ENSG00000123684 | 0,060691755  | 6,421997018 | 0,1846107 | 0,671408192 |
| 3026 | ENSG00000123689 | 0,356613944  | 5,950127834 | 0,5051964 | 0,484337052 |
| 3027 | ENSG00000123728 | -0,120401115 | 4,825098176 | 0,7989172 | 0,384786105 |
| 3028 | ENSG00000123737 | -0,177904977 | 4,144591686 | 2,4612935 | 0,283908735 |
| 3029 | ENSG00000123739 | 0,094045885  | 5,260780491 | 0,505731  | 0,484083781 |
| 3030 | ENSG00000123836 | -0,184617291 | 5,97476085  | 0,2629977 | 0,612934942 |
| 3031 | ENSG00000123908 | 0,011680469  | 6,037857099 | 0,0031057 | 0,95603649  |
| 3032 | ENSG00000123933 | 0,490782882  | 4,732134569 | 5,2638147 | 0,031188534 |
| 3033 | ENSG00000123983 | -0,058846228 | 6,199859569 | 0,1863073 | 0,669993679 |
| 3034 | ENSG00000123989 | 0,528345138  | 5,70678558  | 5,1054531 | 0,033581588 |
| 3035 | ENSG00000123992 | 0,077869728  | 4,943457741 | 0,2730578 | 0,606259434 |
| 3036 | ENSG00000124006 | 0,46294316   | 6,24591569  | 4,5342452 | 0,044092672 |
| 3037 | ENSG00000124067 | 0,278641869  | 5,43117597  | 1,9103121 | 0,180141183 |
| 3038 | ENSG00000124098 | 0,024148808  | 5,605990012 | 0,0474595 | 0,829449691 |
| 3039 | ENSG00000124120 | -0,319817856 | 4,054201772 | 1,9138483 | 0,179754089 |
| 3040 | ENSG00000124126 | -0,254169294 | 4,409212046 | 0,7910613 | 0,382943426 |
| 3041 | ENSG00000124145 | 0,502769244  | 6,233320831 | 4,1924058 | 0,052135207 |
| 3042 | ENSG00000124151 | -0,117154405 | 5,986176987 | 0,8648159 | 0,36197306  |
| 3043 | ENSG00000124155 | 0,03968317   | 6,325047739 | 0,0713406 | 0,79176021  |
| 3044 | ENSG00000124160 | -0,032498377 | 4,317368083 | 0,033019  | 0,857393442 |
| 3045 | ENSG00000124164 | -0,000643152 | 6,096899885 | 2,139E-05 | 0,996349793 |
| 3046 | ENSG00000124172 | -0,59246934  | 7,970147806 | 5,8396752 | 0,023962776 |
| 3047 | ENSG00000124177 | 0,102734259  | 6,459776325 | 0,8866634 | 0,356087989 |
| 3048 | ENSG00000124181 | 0,372466617  | 5,516130396 | 2,6506947 | 0,117061098 |
| 3049 | ENSG00000124193 | 0,019340343  | 6,331029398 | 0,017558  | 0,895728026 |
| 3050 | ENSG00000124198 | -0,003103333 | 6,926405731 | 0,0005736 | 0,981096917 |
| 3051 | ENSG00000124201 | 0,313923464  | 5,983900384 | 3,4629445 | 0,075527451 |
| 3052 | ENSG00000124207 | -0,297961223 | 6,125002772 | 2,1838493 | 0,152963733 |
| 3053 | ENSG00000124209 | 0,24536191   | 5,279442965 | 1,922868  | 0,17877132  |
| 3054 | ENSG00000124212 | 0,89115702   | 7,035859305 | 2,9976548 | 0,096714279 |
| 3055 | ENSG00000124214 | 0,144528623  | 6,07483853  | 1,678134  | 0,207918025 |
| 3056 | ENSG00000124222 | 0,209954655  | 5,158644025 | 1,9449165 | 0,176396448 |
| 3057 | ENSG00000124225 | -0,043997515 | 4,934155757 | 0,0275876 | 0,869526441 |
| 3058 | ENSG00000124226 | 0,047457188  | 5,242716051 | 0,1606949 | 0,753762968 |
| 3059 | ENSG00000124228 | -0,018190982 | 4,379067607 | 0,0153709 | 0,902401235 |
| 3060 | ENSG00000124275 | -0,166278898 | 4,870393484 | 1,9956971 | 0,179038576 |
| 3061 | ENSG00000124299 | -0,21966046  | 4,433423731 | 1,6081954 | 0,217371445 |
| 3062 | ENSG00000124333 | 0,029893105  | 4,937108458 | 0,027482  | 0,869774016 |
| 3063 | ENSG00000124356 | -0,144888245 | 4,883209843 | 1,9746624 | 0,300313863 |
| 3064 | ENSG00000124357 | 0,031553807  | 4,756615897 | 0,0525186 | 0,895767976 |
| 3065 | ENSG00000124370 | -0,210029833 | 4,247525252 | 1,0174827 | 0,323560985 |
| 3066 | ENSG00000124374 | 0,229187656  | 5,9493142   | 0,5808063 | 0,453703859 |

|      |                 |              |             |           |             |
|------|-----------------|--------------|-------------|-----------|-------------|
| 3067 | ENSG00000124380 | -0,187982372 | 4,369839043 | 1,9746423 | 0,238049582 |
| 3068 | ENSG00000124383 | 0,025302244  | 4,727701    | 0,0616951 | 0,806022515 |
| 3069 | ENSG00000124406 | 0,04538118   | 6,734507363 | 0,1190217 | 0,733206972 |
| 3070 | ENSG00000124422 | 0,379742454  | 6,895320367 | 3,6090621 | 0,070013922 |
| 3071 | ENSG00000124429 | 0,147493523  | 4,637296938 | 0,2324299 | 0,634261991 |
| 3072 | ENSG00000124440 | -0,033311154 | 5,2585394   | 0,0082761 | 0,928297652 |
| 3073 | ENSG00000124459 | 0,023963868  | 3,918963842 | 0,0590251 | 0,891139359 |
| 3074 | ENSG00000124486 | 0,04177066   | 8,075618971 | 0,1161368 | 0,736330406 |
| 3075 | ENSG00000124491 | -1,672558448 | 7,824733855 | 44,405814 | 8,26724E-07 |
| 3076 | ENSG00000124523 | -0,231850582 | 5,430280931 | 1,6464815 | 0,212156168 |
| 3077 | ENSG00000124532 | -0,226165114 | 5,579647544 | 1,7090912 | 0,203959882 |
| 3078 | ENSG00000124535 | -0,067292518 | 4,897214042 | 0,3467905 | 0,561627669 |
| 3079 | ENSG00000124541 | -0,283874989 | 4,313210055 | 4,8780705 | 0,067340965 |
| 3080 | ENSG00000124562 | -0,426566856 | 5,328479034 | 7,42808   | 0,012029617 |
| 3081 | ENSG00000124570 | -0,56265     | 7,093052908 | 14,641737 | 0,000855125 |
| 3082 | ENSG00000124571 | 0,081250271  | 4,77878813  | 0,3996669 | 0,609906277 |
| 3083 | ENSG00000124588 | -0,377300014 | 5,089392271 | 4,8734406 | 0,037468068 |
| 3084 | ENSG00000124596 | -0,061618346 | 4,379890609 | 0,234438  | 0,777522031 |
| 3085 | ENSG00000124614 | 0,061233509  | 4,039774086 | 0,0761334 | 0,785059372 |
| 3086 | ENSG00000124615 | -0,308176191 | 4,758348189 | 1,7491016 | 0,198927799 |
| 3087 | ENSG00000124641 | -0,341208054 | 3,790385799 | 13,697032 | 0,062825388 |
| 3088 | ENSG00000124688 | -0,291173253 | 4,037458834 | 4,1380756 | 0,0877439   |
| 3089 | ENSG00000124701 | -0,596378564 | 6,008473995 | 5,2833511 | 0,030906772 |
| 3090 | ENSG00000124702 | -0,033590347 | 5,934700852 | 0,0466231 | 0,83094132  |
| 3091 | ENSG00000124733 | 0,035530096  | 4,101627712 | 0,0439917 | 0,835706781 |
| 3092 | ENSG00000124743 | -0,445874561 | 8,04879413  | 1,7617721 | 0,197366398 |
| 3093 | ENSG00000124749 | 0,849367072  | 5,834346872 | 13,409908 | 0,001289381 |
| 3094 | ENSG00000124762 | 0,072827113  | 5,906981148 | 0,0573424 | 0,81285759  |
| 3095 | ENSG00000124766 | 0,056390978  | 4,180083721 | 0,0489436 | 0,826854635 |
| 3096 | ENSG00000124767 | -0,394687437 | 6,602974149 | 3,3642287 | 0,079534169 |
| 3097 | ENSG00000124772 | 0,322563104  | 5,328101428 | 0,8745452 | 0,359368658 |
| 3098 | ENSG00000124782 | 0,023076132  | 5,449848708 | 0,0169031 | 0,897681821 |
| 3099 | ENSG00000124783 | 0,138239966  | 6,77714009  | 0,901968  | 0,352054455 |
| 3100 | ENSG00000124784 | 0,006049909  | 4,051378836 | 0,001743  | 0,967056753 |
| 3101 | ENSG00000124785 | -0,173855404 | 3,784310345 | 0,9531088 | 0,339037451 |
| 3102 | ENSG00000124786 | 0,112591285  | 4,074914413 | 0,5698581 | 0,45793896  |
| 3103 | ENSG00000124788 | 0,288652434  | 6,209729576 | 3,3300889 | 0,080976262 |
| 3104 | ENSG00000124789 | 0,074923096  | 5,745814927 | 0,3754216 | 0,546025068 |
| 3105 | ENSG00000124795 | -0,277440705 | 6,777140061 | 3,2373528 | 0,085047849 |
| 3106 | ENSG00000124831 | 0,219912996  | 6,828156924 | 3,3745242 | 0,079059868 |
| 3107 | ENSG00000124942 | 0,495655058  | 11,41561939 | 2,7641968 | 0,10988105  |
| 3108 | ENSG00000125037 | -0,546051961 | 6,040962695 | 8,9796239 | 0,006419615 |
| 3109 | ENSG00000125107 | 0,087784347  | 7,009243026 | 0,8485339 | 0,36645011  |
| 3110 | ENSG00000125124 | 0,058952252  | 5,806093932 | 0,2024421 | 0,656933929 |
| 3111 | ENSG00000125148 | -0,647028494 | 5,905961982 | 1,5664909 | 0,223236866 |
| 3112 | ENSG00000125166 | -0,279801476 | 7,666025136 | 1,4339593 | 0,243256586 |
| 3113 | ENSG00000125249 | 0,042262749  | 5,467715061 | 0,0439463 | 0,83579043  |
| 3114 | ENSG00000125257 | 0,02033306   | 3,96740237  | 0,0086315 | 0,926778997 |
| 3115 | ENSG00000125266 | 0,587765727  | 3,979963358 | 4,2166079 | 0,051514201 |
| 3116 | ENSG00000125304 | -0,075065333 | 6,92330993  | 0,2764276 | 0,604046537 |
| 3117 | ENSG00000125347 | 0,114236717  | 4,364049598 | 0,1971196 | 0,661184851 |
| 3118 | ENSG00000125354 | 0,269279163  | 4,404857544 | 2,6198784 | 0,119099245 |
| 3119 | ENSG00000125356 | -0,811598671 | 7,802669909 | 10,476808 | 0,003627969 |
| 3120 | ENSG00000125375 | -0,118643915 | 3,869466874 | 0,9327628 | 0,516058557 |
| 3121 | ENSG00000125386 | -0,014010072 | 4,263619199 | 0,0053568 | 0,9422845   |
| 3122 | ENSG00000125398 | 0,723916063  | 4,024529091 | 6,0619256 | 0,021690599 |
| 3123 | ENSG00000125445 | -0,466933298 | 5,841172074 | 6,5239859 | 0,017694308 |
| 3124 | ENSG00000125447 | -0,051683221 | 4,350489797 | 0,0810825 | 0,778371533 |
| 3125 | ENSG00000125450 | -0,177429302 | 4,475854366 | 1,6638247 | 0,20980118  |

|      |                 |              |             |           |             |
|------|-----------------|--------------|-------------|-----------|-------------|
| 3126 | ENSG00000125459 | 0,028794078  | 4,140117164 | 0,0391424 | 0,930916821 |
| 3127 | ENSG00000125482 | -0,244709999 | 4,47657679  | 3,0148473 | 0,095780023 |
| 3128 | ENSG00000125484 | 0,127105141  | 4,916645878 | 0,9192033 | 0,358139683 |
| 3129 | ENSG00000125503 | 0,063075577  | 6,197868962 | 0,0698679 | 0,793871891 |
| 3130 | ENSG00000125629 | 0,024098505  | 4,677844945 | 0,0232406 | 0,880155991 |
| 3131 | ENSG00000125630 | -0,040813681 | 4,165631939 | 0,1154147 | 0,820378293 |
| 3132 | ENSG00000125633 | 0,069659398  | 5,888615169 | 0,1958735 | 0,662186622 |
| 3133 | ENSG00000125648 | 0,098622897  | 5,335215022 | 0,1795982 | 0,6756368   |
| 3134 | ENSG00000125651 | 0,126843157  | 4,610286623 | 0,5022601 | 0,485596075 |
| 3135 | ENSG00000125676 | -0,136211469 | 6,115282603 | 0,9213553 | 0,34702846  |
| 3136 | ENSG00000125686 | 0,044128997  | 5,295313332 | 0,1555189 | 0,74728886  |
| 3137 | ENSG00000125691 | 0,056216087  | 8,571270403 | 0,0597699 | 0,809017362 |
| 3138 | ENSG00000125703 | 0,033699288  | 3,899149204 | 0,0350198 | 0,853187207 |
| 3139 | ENSG00000125730 | 0,934202195  | 9,821660973 | 2,2597034 | 0,146321326 |
| 3140 | ENSG00000125733 | -0,171568342 | 5,358468187 | 1,102125  | 0,30465396  |
| 3141 | ENSG00000125734 | 0,284906028  | 4,028171284 | 2,8511764 | 0,111213897 |
| 3142 | ENSG00000125741 | -0,261384938 | 4,830909005 | 1,4653804 | 0,238310131 |
| 3143 | ENSG00000125743 | -0,173679669 | 5,768933768 | 0,7401981 | 0,398434286 |
| 3144 | ENSG00000125753 | -0,390184156 | 4,861837759 | 4,0888448 | 0,054889999 |
| 3145 | ENSG00000125755 | 0,097819806  | 4,722462851 | 0,2407802 | 0,628269625 |
| 3146 | ENSG00000125772 | -0,015050858 | 6,162763884 | 0,0080471 | 0,929293877 |
| 3147 | ENSG00000125779 | -0,034288175 | 4,353738191 | 0,0720423 | 0,834937439 |
| 3148 | ENSG00000125810 | -0,089719581 | 6,650502844 | 0,3209968 | 0,576470199 |
| 3149 | ENSG00000125812 | 0,041919754  | 4,840447748 | 0,0914421 | 0,765049411 |
| 3150 | ENSG00000125814 | 0,021027243  | 4,21309436  | 0,0259511 | 0,928685513 |
| 3151 | ENSG00000125817 | 0,079730525  | 5,15422173  | 0,1827383 | 0,672986829 |
| 3152 | ENSG00000125818 | -0,11744319  | 5,755451136 | 1,225881  | 0,279560527 |
| 3153 | ENSG00000125826 | 0,146907035  | 4,655785074 | 0,8162417 | 0,375601681 |
| 3154 | ENSG00000125827 | -0,375353463 | 7,745545939 | 6,3562755 | 0,01901378  |
| 3155 | ENSG00000125834 | 0,12260511   | 4,494191819 | 0,3295735 | 0,571455588 |
| 3156 | ENSG00000125835 | -0,01940115  | 4,168757841 | 0,0131635 | 0,909648221 |
| 3157 | ENSG00000125844 | 0,06434797   | 6,228911111 | 0,0678965 | 0,796731908 |
| 3158 | ENSG00000125846 | 0,103394966  | 3,928836596 | 0,633821  | 0,565212618 |
| 3159 | ENSG00000125863 | -0,36813242  | 4,836167244 | 9,6816719 | 0,004879576 |
| 3160 | ENSG00000125868 | -0,225830666 | 8,643740232 | 2,1398031 | 0,156940197 |
| 3161 | ENSG00000125870 | -0,223811888 | 4,926987916 | 1,7305648 | 0,201239788 |
| 3162 | ENSG00000125871 | -0,104033641 | 3,789966186 | 0,6936918 | 0,582417862 |
| 3163 | ENSG00000125875 | 0,169733069  | 5,05176427  | 1,3835139 | 0,251459854 |
| 3164 | ENSG00000125944 | 0,035705115  | 6,716958032 | 0,0858373 | 0,772142573 |
| 3165 | ENSG00000125945 | -0,331211798 | 5,335241264 | 2,3399198 | 0,13966836  |
| 3166 | ENSG00000125952 | 0,071368923  | 4,853681761 | 0,4554356 | 0,585524424 |
| 3167 | ENSG00000125968 | 0,368872818  | 5,940298243 | 4,1304725 | 0,053763324 |
| 3168 | ENSG00000125970 | -0,004620037 | 5,857916183 | 0,0010643 | 0,974254574 |
| 3169 | ENSG00000125977 | -0,301588785 | 6,250523206 | 3,5632954 | 0,071689731 |
| 3170 | ENSG00000125991 | 0,085771689  | 6,007025929 | 0,2547407 | 0,618534973 |
| 3171 | ENSG00000125995 | -0,148987746 | 4,698856361 | 0,3506156 | 0,559513332 |
| 3172 | ENSG00000126001 | 0,390049969  | 4,161745308 | 3,6483451 | 0,068611163 |
| 3173 | ENSG00000126012 | -0,018467831 | 5,549082812 | 0,0086555 | 0,926677745 |
| 3174 | ENSG00000126016 | 0,573584226  | 4,227526572 | 4,5057962 | 0,044705683 |
| 3175 | ENSG00000126067 | -0,186476712 | 5,152373561 | 3,0192931 | 0,095541758 |
| 3176 | ENSG00000126070 | 0,041535098  | 6,098037416 | 0,0568677 | 0,813618575 |
| 3177 | ENSG00000126088 | -0,067528593 | 5,310685855 | 0,1608418 | 0,69206623  |
| 3178 | ENSG00000126107 | 0,112452511  | 4,11444656  | 0,333573  | 0,569146967 |
| 3179 | ENSG00000126214 | -0,005871078 | 4,987411578 | 0,001317  | 0,971362748 |
| 3180 | ENSG00000126216 | 0,021150202  | 4,617222728 | 0,0289175 | 0,965085489 |
| 3181 | ENSG00000126217 | -0,249453414 | 4,975924512 | 1,1288679 | 0,298992787 |
| 3182 | ENSG00000126226 | -0,126815826 | 5,448572226 | 1,4188096 | 0,245646721 |
| 3183 | ENSG00000126247 | -0,100459388 | 6,933748198 | 0,5105364 | 0,482036776 |
| 3184 | ENSG00000126261 | 0,090129078  | 6,238006099 | 0,3224176 | 0,575633349 |

|      |                 |              |             |           |             |
|------|-----------------|--------------|-------------|-----------|-------------|
| 3185 | ENSG00000126267 | -0,626846637 | 7,709321692 | 8,806453  | 0,006872284 |
| 3186 | ENSG00000126351 | 0,345754401  | 5,566392167 | 3,3915686 | 0,078400565 |
| 3187 | ENSG00000126432 | -0,283117349 | 6,913241348 | 1,9714005 | 0,173594432 |
| 3188 | ENSG00000126457 | -0,159945188 | 6,224195115 | 0,7526385 | 0,394560438 |
| 3189 | ENSG00000126458 | 0,098416933  | 4,916174849 | 0,2131671 | 0,648612441 |
| 3190 | ENSG00000126524 | 0,031648526  | 6,980240246 | 0,047881  | 0,828707583 |
| 3191 | ENSG00000126561 | -0,044455448 | 4,684560986 | 0,0225134 | 0,882031161 |
| 3192 | ENSG00000126581 | -0,164855396 | 5,209683208 | 1,9007391 | 0,181148591 |
| 3193 | ENSG00000126602 | -0,042960356 | 4,918566933 | 0,0494268 | 0,826016497 |
| 3194 | ENSG00000126653 | -0,028464485 | 5,017146893 | 0,0648936 | 0,839973661 |
| 3195 | ENSG00000126698 | -0,16837846  | 5,87809658  | 1,1422697 | 0,296208964 |
| 3196 | ENSG00000126709 | 0,798705462  | 4,394776996 | 12,003842 | 0,00209057  |
| 3197 | ENSG00000126749 | -0,237256375 | 4,329290326 | 3,8078158 | 0,118108717 |
| 3198 | ENSG00000126756 | -0,163030815 | 4,535022262 | 1,2377222 | 0,312126319 |
| 3199 | ENSG00000126773 | 0,109652107  | 6,658607029 | 0,4781002 | 0,496171365 |
| 3200 | ENSG00000126775 | 0,150487486  | 5,133831998 | 1,1055524 | 0,303905118 |
| 3201 | ENSG00000126777 | -0,266866563 | 8,664426661 | 1,8644852 | 0,185234286 |
| 3202 | ENSG00000126785 | -0,123073597 | 4,309112576 | 0,4952917 | 0,48860632  |
| 3203 | ENSG00000126790 | 0,084341016  | 3,781749154 | 0,3495193 | 0,639030079 |
| 3204 | ENSG00000126803 | 1,164939499  | 4,667033206 | 10,873607 | 0,003134932 |
| 3205 | ENSG00000126804 | 0,200346202  | 5,441591313 | 1,986352  | 0,172009199 |
| 3206 | ENSG00000126814 | -0,00311212  | 4,188658679 | 0,0005229 | 0,981951306 |
| 3207 | ENSG00000126821 | -0,06965148  | 3,872985625 | 0,1225187 | 0,729488267 |
| 3208 | ENSG00000126822 | 0,371455672  | 4,303853305 | 2,3967599 | 0,135171641 |
| 3209 | ENSG00000126858 | -0,175537543 | 5,815935608 | 1,2715581 | 0,271045031 |
| 3210 | ENSG00000126870 | -0,191768681 | 5,098835036 | 1,6582687 | 0,21058214  |
| 3211 | ENSG00000126878 | -0,552671489 | 4,757405747 | 12,388377 | 0,001827723 |
| 3212 | ENSG00000126882 | -0,321290812 | 5,000214858 | 1,7884182 | 0,1941319   |
| 3213 | ENSG00000126883 | -0,054215738 | 5,321869242 | 0,0992714 | 0,755532701 |
| 3214 | ENSG00000126934 | -0,171039502 | 5,34785832  | 0,7373036 | 0,399343773 |
| 3215 | ENSG00000126945 | -0,097287649 | 5,914345712 | 0,5407411 | 0,469496868 |
| 3216 | ENSG00000126947 | 0,158074453  | 5,116015967 | 1,7086418 | 0,203972868 |
| 3217 | ENSG00000127022 | 0,151935814  | 9,008841647 | 0,9651863 | 0,33602136  |
| 3218 | ENSG00000127054 | -0,050509919 | 4,923054341 | 0,1135144 | 0,739217258 |
| 3219 | ENSG00000127081 | -0,177695482 | 4,607226426 | 1,4466488 | 0,241239404 |
| 3220 | ENSG00000127083 | 1,743712767  | 5,034551863 | 12,900412 | 0,001532279 |
| 3221 | ENSG00000127125 | 0,058780065  | 4,805542203 | 0,1044302 | 0,749482188 |
| 3222 | ENSG00000127184 | -0,610544521 | 8,906910384 | 7,447696  | 0,011931386 |
| 3223 | ENSG00000127241 | 0,731279197  | 4,866308111 | 4,2602971 | 0,050414242 |
| 3224 | ENSG00000127311 | 0,077168329  | 3,759901449 | 0,1229268 | 0,729056931 |
| 3225 | ENSG00000127314 | 0,100656463  | 6,442395344 | 0,2931868 | 0,593367162 |
| 3226 | ENSG00000127328 | -0,69319151  | 5,219800193 | 6,6605573 | 0,016675109 |
| 3227 | ENSG00000127329 | -0,341065866 | 6,817338098 | 3,0498777 | 0,094022372 |
| 3228 | ENSG00000127334 | -0,046070135 | 6,452539956 | 0,0583417 | 0,811266518 |
| 3229 | ENSG00000127445 | -0,108955186 | 4,768692944 | 0,3789324 | 0,544189726 |
| 3230 | ENSG00000127463 | -0,024470323 | 5,447846144 | 0,0226108 | 0,881778167 |
| 3231 | ENSG00000127472 | -0,257442966 | 6,049967498 | 2,2760172 | 0,144938185 |
| 3232 | ENSG00000127481 | -0,015767418 | 7,656478265 | 0,0043512 | 0,947974136 |
| 3233 | ENSG00000127483 | 0,210622424  | 7,039860465 | 2,5202301 | 0,125934451 |
| 3234 | ENSG00000127511 | 0,211521649  | 4,672455848 | 1,1927142 | 0,286036296 |
| 3235 | ENSG00000127526 | 0,055882082  | 4,750493186 | 0,1711924 | 0,739620078 |
| 3236 | ENSG00000127527 | -0,10563379  | 5,204574894 | 0,2054487 | 0,654585067 |
| 3237 | ENSG00000127540 | -0,474134676 | 5,377944047 | 3,8067856 | 0,063269788 |
| 3238 | ENSG00000127603 | -0,031068642 | 10,15424064 | 0,0410926 | 0,841127072 |
| 3239 | ENSG00000127616 | -0,029785529 | 4,944161943 | 0,0203687 | 0,887749066 |
| 3240 | ENSG00000127663 | 0,001553536  | 4,123390444 | 6,839E-05 | 0,99347287  |
| 3241 | ENSG00000127720 | -0,19938536  | 4,367148116 | 1,023708  | 0,322116523 |
| 3242 | ENSG00000127804 | 0,136693114  | 4,774718629 | 0,892658  | 0,354517207 |
| 3243 | ENSG00000127824 | -0,683927605 | 5,425014475 | 3,7121663 | 0,066400037 |



|      |                 |              |             |           |             |
|------|-----------------|--------------|-------------|-----------|-------------|
| 3244 | ENSG00000127837 | 0,254645618  | 5,332972744 | 2,553926  | 0,123603174 |
| 3245 | ENSG00000127838 | -0,210717611 | 4,741553512 | 1,4110811 | 0,246941114 |
| 3246 | ENSG00000127863 | -1,094201282 | 6,295452971 | 23,060944 | 7,53194E-05 |
| 3247 | ENSG00000127870 | 0,033714187  | 5,085667816 | 0,0512303 | 0,822925926 |
| 3248 | ENSG00000127884 | -0,064347927 | 6,344448609 | 0,0951963 | 0,76043602  |
| 3249 | ENSG00000127914 | -0,124012193 | 7,96220174  | 0,5135806 | 0,480762326 |
| 3250 | ENSG00000127920 | -0,408663901 | 6,036793554 | 4,1375154 | 0,053575307 |
| 3251 | ENSG00000127922 | -0,326408315 | 5,649205781 | 6,4310258 | 0,018400129 |
| 3252 | ENSG00000127946 | -0,039389679 | 5,086131108 | 0,0346101 | 0,854038212 |
| 3253 | ENSG00000127947 | -0,001675255 | 6,063428062 | 8,874E-05 | 0,992564826 |
| 3254 | ENSG00000127948 | 0,046097693  | 4,566533743 | 0,0438715 | 0,835928109 |
| 3255 | ENSG00000127951 | 0,582719675  | 6,01082305  | 3,3943129 | 0,078287805 |
| 3256 | ENSG00000127954 | -0,849587148 | 6,895019157 | 11,882686 | 0,002181752 |
| 3257 | ENSG00000127955 | 0,186824428  | 4,577654505 | 0,5536831 | 0,464315035 |
| 3258 | ENSG00000127980 | -0,160899272 | 5,279343375 | 0,8844964 | 0,356699235 |
| 3259 | ENSG00000127989 | -0,126936029 | 3,781858108 | 0,8288249 | 0,527244784 |
| 3260 | ENSG00000127990 | -0,103628291 | 5,801357065 | 0,4032619 | 0,531646312 |
| 3261 | ENSG00000127993 | 0,014969735  | 4,013911753 | 0,0153491 | 0,939361385 |
| 3262 | ENSG00000127995 | -0,22675664  | 5,770267589 | 1,1186089 | 0,301147595 |
| 3263 | ENSG00000128000 | -0,153296742 | 6,005279584 | 0,6158995 | 0,44054549  |
| 3264 | ENSG00000128016 | -0,005007387 | 6,406175891 | 0,0001849 | 0,989268894 |
| 3265 | ENSG00000128050 | -0,153939958 | 5,195342632 | 2,1813694 | 0,185527089 |
| 3266 | ENSG00000128052 | 0,993937732  | 6,564238421 | 3,5656983 | 0,071600615 |
| 3267 | ENSG00000128159 | 0,280294594  | 4,479020425 | 1,8140085 | 0,191086925 |
| 3268 | ENSG00000128185 | 0,050773333  | 4,42669247  | 0,0545138 | 0,817442809 |
| 3269 | ENSG00000128191 | 0,014877028  | 4,178056277 | 0,0073613 | 0,999383636 |
| 3270 | ENSG00000128245 | 0,081859802  | 5,560918417 | 0,2863513 | 0,597679623 |
| 3271 | ENSG00000128272 | -0,27720176  | 7,216004005 | 3,4494154 | 0,076022425 |
| 3272 | ENSG00000128284 | -0,248066999 | 5,190828177 | 1,9684563 | 0,173903245 |
| 3273 | ENSG00000128294 | -0,338745376 | 4,368978248 | 5,0039761 | 0,035211045 |
| 3274 | ENSG00000128309 | -0,359483096 | 4,538532315 | 3,1778224 | 0,087785844 |
| 3275 | ENSG00000128335 | -0,267908436 | 4,937251044 | 2,7510673 | 0,11070055  |
| 3276 | ENSG00000128463 | -0,201351947 | 4,418396852 | 2,9797371 | 0,160410504 |
| 3277 | ENSG00000128487 | 0,378606978  | 4,723333083 | 5,3756052 | 0,029614127 |
| 3278 | ENSG00000128512 | -0,083927741 | 5,745480852 | 0,3207318 | 0,576626551 |
| 3279 | ENSG00000128513 | -0,232476533 | 4,773668254 | 1,61362   | 0,216622825 |
| 3280 | ENSG00000128524 | -0,266559983 | 4,459169608 | 3,3445795 | 0,080323148 |
| 3281 | ENSG00000128534 | -0,273888535 | 5,526090913 | 3,4253895 | 0,077023812 |
| 3282 | ENSG00000128567 | -0,327685741 | 6,651535068 | 2,4007624 | 0,134861532 |
| 3283 | ENSG00000128578 | -0,185872455 | 4,699929246 | 0,4914737 | 0,490269226 |
| 3284 | ENSG00000128581 | 0,054039675  | 3,783518904 | 0,1316583 | 0,757989281 |
| 3285 | ENSG00000128585 | -0,184909123 | 7,087416005 | 1,7803368 | 0,195060997 |
| 3286 | ENSG00000128590 | -0,121050218 | 6,078049037 | 0,2802643 | 0,601576393 |
| 3287 | ENSG00000128591 | 0,188107372  | 8,580873448 | 0,1765148 | 0,678265736 |
| 3288 | ENSG00000128595 | -0,362141425 | 8,401417865 | 2,3627263 | 0,137843052 |
| 3289 | ENSG00000128607 | 0,146267098  | 5,688826428 | 1,7350385 | 0,200634156 |
| 3290 | ENSG00000128609 | -0,994892755 | 7,810264448 | 6,1641206 | 0,020727107 |
| 3291 | ENSG00000128641 | -0,041400539 | 5,802409926 | 0,0804775 | 0,779174618 |
| 3292 | ENSG00000128654 | -0,406328703 | 5,159949359 | 8,4151388 | 0,008015788 |
| 3293 | ENSG00000128692 | -0,223900749 | 3,925911941 | 1,9017283 | 0,238409494 |
| 3294 | ENSG00000128694 | -0,193832771 | 4,040104843 | 2,2426589 | 0,247883445 |
| 3295 | ENSG00000128699 | -0,041600429 | 5,215140661 | 0,0774108 | 0,783311329 |
| 3296 | ENSG00000128708 | -0,409106637 | 5,252470296 | 5,0116205 | 0,035096188 |
| 3297 | ENSG00000128731 | -0,155317612 | 7,026846901 | 0,473231  | 0,498350853 |
| 3298 | ENSG00000128739 | 0,112787207  | 5,47391675  | 0,2021804 | 0,657155192 |
| 3299 | ENSG00000128789 | 0,023524589  | 4,834531487 | 0,029228  | 0,865737356 |
| 3300 | ENSG00000128791 | 0,296219033  | 4,967346819 | 2,4370922 | 0,132084951 |
| 3301 | ENSG00000128829 | 0,061969743  | 5,683224451 | 0,4725537 | 0,498631664 |
| 3302 | ENSG00000128833 | -0,765826173 | 4,41069895  | 10,847069 | 0,003165504 |

|      |                 |              |             |           |             |
|------|-----------------|--------------|-------------|-----------|-------------|
| 3303 | ENSG00000128849 | 1,039511084  | 6,148928883 | 5,8056916 | 0,024333019 |
| 3304 | ENSG00000128872 | 0,153929405  | 5,626223532 | 0,4926185 | 0,489769598 |
| 3305 | ENSG00000128881 | -0,08805359  | 5,8856275   | 0,5148886 | 0,480195427 |
| 3306 | ENSG00000128908 | 0,046073176  | 5,186930572 | 0,1010048 | 0,75347711  |
| 3307 | ENSG00000128915 | 0,035053096  | 5,640755866 | 0,1049227 | 0,748903211 |
| 3308 | ENSG00000128918 | 1,664092506  | 5,993988637 | 20,71029  | 0,000141085 |
| 3309 | ENSG00000128923 | -0,033607183 | 6,672194031 | 0,0376437 | 0,847855437 |
| 3310 | ENSG00000128928 | 0,169976827  | 5,909742952 | 0,9462631 | 0,340743538 |
| 3311 | ENSG00000128951 | 0,005020628  | 4,962605491 | 0,0016435 | 0,968009179 |
| 3312 | ENSG00000128989 | -0,070816727 | 7,479996118 | 0,1659168 | 0,687514454 |
| 3313 | ENSG00000129003 | -0,099635782 | 8,149374642 | 0,3771898 | 0,545088698 |
| 3314 | ENSG00000129009 | 0,72679362   | 4,367269969 | 5,0125361 | 0,035081044 |
| 3315 | ENSG00000129055 | -0,182479703 | 5,76934724  | 0,6663763 | 0,422651924 |
| 3316 | ENSG00000129071 | -0,027940673 | 4,991105485 | 0,0691891 | 0,839347655 |
| 3317 | ENSG00000129083 | 0,007174308  | 6,7056402   | 0,0017764 | 0,966742825 |
| 3318 | ENSG00000129084 | -0,282416952 | 4,621310431 | 1,6069453 | 0,217544433 |
| 3319 | ENSG00000129103 | 0,285648752  | 4,904900789 | 2,1566878 | 0,155429737 |
| 3320 | ENSG00000129116 | -0,263091045 | 8,826196975 | 1,8457368 | 0,187359212 |
| 3321 | ENSG00000129128 | 0,069132275  | 7,214884101 | 0,1278771 | 0,723888212 |
| 3322 | ENSG00000129170 | -0,82967235  | 10,03743232 | 5,8380973 | 0,023979828 |
| 3323 | ENSG00000129187 | 0,437341488  | 4,924011935 | 11,156839 | 0,002818716 |
| 3324 | ENSG00000129197 | -0,147633871 | 4,444211738 | 2,3824899 | 0,300584557 |
| 3325 | ENSG00000129235 | -0,300320672 | 4,013725666 | 3,0309478 | 0,098377075 |
| 3326 | ENSG00000129245 | -0,194221781 | 5,689107589 | 1,3282599 | 0,260896187 |
| 3327 | ENSG00000129250 | -0,133984141 | 8,221504256 | 0,3984872 | 0,534065225 |
| 3328 | ENSG00000129255 | -0,389023463 | 4,179038156 | 5,5053526 | 0,027897148 |
| 3329 | ENSG00000129292 | -0,122227338 | 6,59332444  | 0,4779072 | 0,49625743  |
| 3330 | ENSG00000129315 | 0,066777214  | 5,662498304 | 0,2814359 | 0,60080458  |
| 3331 | ENSG00000129317 | -0,00708044  | 5,241391593 | 0,0012653 | 0,97193019  |
| 3332 | ENSG00000129351 | 0,026921978  | 6,597385382 | 0,0273036 | 0,87019344  |
| 3333 | ENSG00000129353 | -0,00244316  | 6,225520064 | 0,0001589 | 0,990050145 |
| 3334 | ENSG00000129422 | -0,157376862 | 7,81375682  | 0,9465332 | 0,340648729 |
| 3335 | ENSG00000129460 | -0,210230912 | 4,318060182 | 2,5710756 | 0,194448822 |
| 3336 | ENSG00000129467 | -0,294236487 | 4,739743906 | 2,4808266 | 0,128831773 |
| 3337 | ENSG00000129472 | 0,15938363   | 4,40305792  | 2,6669505 | 0,247610342 |
| 3338 | ENSG00000129473 | 0,228727083  | 5,598134272 | 3,3692142 | 0,079280815 |
| 3339 | ENSG00000129484 | -0,033605606 | 3,989739637 | 0,0587572 | 0,810602535 |
| 3340 | ENSG00000129493 | 0,003512909  | 5,245865523 | 0,0012266 | 0,972361046 |
| 3341 | ENSG00000129515 | -0,156316734 | 6,163310189 | 0,5854503 | 0,451926559 |
| 3342 | ENSG00000129518 | 0,108966095  | 4,413650334 | 0,3771914 | 0,545108673 |
| 3343 | ENSG00000129521 | 0,05077139   | 6,103725083 | 0,024541  | 0,876876459 |
| 3344 | ENSG00000129534 | 0,107379252  | 4,626471562 | 0,3403974 | 0,565250319 |
| 3345 | ENSG00000129538 | -0,54052614  | 7,368551616 | 6,7885589 | 0,015778664 |
| 3346 | ENSG00000129559 | -0,280256858 | 5,074454937 | 3,3356003 | 0,080741435 |
| 3347 | ENSG00000129562 | -0,247828736 | 5,891789804 | 1,7171915 | 0,202928465 |
| 3348 | ENSG00000129566 | 0,01923196   | 4,878833594 | 0,0083253 | 0,92808564  |
| 3349 | ENSG00000129595 | 0,215207414  | 4,713484892 | 2,2492259 | 0,147191919 |
| 3350 | ENSG00000129596 | -0,268296446 | 4,454126873 | 0,459057  | 0,504791287 |
| 3351 | ENSG00000129625 | -0,222735549 | 7,297565541 | 2,5837071 | 0,121497868 |
| 3352 | ENSG00000129636 | -0,118753287 | 6,219180122 | 0,5538714 | 0,46423996  |
| 3353 | ENSG00000129657 | 0,08272645   | 5,98017355  | 0,2197132 | 0,643649504 |
| 3354 | ENSG00000129675 | 0,094338643  | 6,270996359 | 0,5039946 | 0,484827079 |
| 3355 | ENSG00000129680 | 0,097283756  | 4,873189349 | 1,0125253 | 0,332621699 |
| 3356 | ENSG00000129691 | 0,077048713  | 4,973883643 | 0,5100809 | 0,514116955 |
| 3357 | ENSG00000129757 | -0,091672824 | 4,030969926 | 0,163324  | 0,689829624 |
| 3358 | ENSG00000129824 | 0,569005677  | 6,306629174 | 0,6693186 | 0,421644024 |
| 3359 | ENSG00000129933 | 0,266734942  | 4,981162091 | 2,0008279 | 0,17054425  |
| 3360 | ENSG00000129991 | -0,001430354 | 9,165923937 | 1,311E-05 | 0,997142328 |
| 3361 | ENSG00000130021 | -0,453283206 | 3,897284351 | 8,5462145 | 0,011372768 |

|      |                 |              |             |           |             |
|------|-----------------|--------------|-------------|-----------|-------------|
| 3362 | ENSG00000130023 | -0,008255497 | 4,204231171 | 0,0062416 | 0,953409238 |
| 3363 | ENSG00000130024 | 0,076550686  | 6,560307837 | 0,3109327 | 0,582450738 |
| 3364 | ENSG00000130037 | -0,333019352 | 5,346139125 | 1,7055179 | 0,20441693  |
| 3365 | ENSG00000130052 | -0,265269059 | 3,848792215 | 1,5512984 | 0,225423029 |
| 3366 | ENSG00000130054 | -0,670065666 | 5,12902428  | 5,7498534 | 0,024955279 |
| 3367 | ENSG00000130066 | 0,197409337  | 7,709174324 | 0,6118217 | 0,442042952 |
| 3368 | ENSG00000130119 | 0,200035667  | 5,210070228 | 1,0214724 | 0,322634228 |
| 3369 | ENSG00000130147 | 0,233104074  | 4,574217568 | 2,3718387 | 0,137117448 |
| 3370 | ENSG00000130150 | 0,224590797  | 4,204043562 | 1,79395   | 0,193468638 |
| 3371 | ENSG00000130158 | 0,199001149  | 4,542743254 | 0,6641171 | 0,423428329 |
| 3372 | ENSG00000130159 | -0,360984804 | 5,253109168 | 2,4174627 | 0,133576667 |
| 3373 | ENSG00000130164 | -0,42851312  | 4,633017461 | 1,4076815 | 0,24749472  |
| 3374 | ENSG00000130175 | 0,15416608   | 5,458383497 | 0,5565331 | 0,463181078 |
| 3375 | ENSG00000130176 | -0,312709418 | 6,524283267 | 0,8662648 | 0,361611735 |
| 3376 | ENSG00000130177 | -0,077149232 | 5,697888546 | 0,526468  | 0,475353609 |
| 3377 | ENSG00000130202 | -0,158948545 | 4,644642517 | 0,5081157 | 0,483090843 |
| 3378 | ENSG00000130203 | 0,480356528  | 5,158316211 | 1,8586796 | 0,185911087 |
| 3379 | ENSG00000130224 | -0,199553706 | 4,233118806 | 0,9499353 | 0,339826883 |
| 3380 | ENSG00000130227 | 0,150199313  | 5,86521413  | 2,0763731 | 0,162960159 |
| 3381 | ENSG00000130254 | 0,144964007  | 5,402771165 | 1,0121214 | 0,324797463 |
| 3382 | ENSG00000130255 | 0,300283386  | 6,479034439 | 1,5061961 | 0,232074593 |
| 3383 | ENSG00000130294 | 0,055640766  | 5,090370499 | 0,0354345 | 0,85233113  |
| 3384 | ENSG00000130300 | 0,038933563  | 5,515961797 | 0,0174862 | 0,895942451 |
| 3385 | ENSG00000130304 | 0,208633463  | 4,686001497 | 0,9111348 | 0,349690996 |
| 3386 | ENSG00000130309 | -0,206638695 | 5,150653516 | 1,6751641 | 0,208351297 |
| 3387 | ENSG00000130312 | -0,432016615 | 4,842437177 | 5,1369876 | 0,033089124 |
| 3388 | ENSG00000130338 | -0,052021227 | 6,698621174 | 0,1523649 | 0,699847488 |
| 3389 | ENSG00000130340 | 0,059910574  | 5,902301871 | 0,2259345 | 0,639000693 |
| 3390 | ENSG00000130347 | -0,661372133 | 3,821555351 | 10,508799 | 0,003585221 |
| 3391 | ENSG00000130348 | -0,564237204 | 4,83869153  | 9,7509996 | 0,004765174 |
| 3392 | ENSG00000130349 | -0,387483071 | 4,140886159 | 5,888899  | 0,023437572 |
| 3393 | ENSG00000130363 | 0,319037777  | 4,190448734 | 4,4563041 | 0,045795159 |
| 3394 | ENSG00000130396 | 0,08285971   | 6,968745861 | 0,2870535 | 0,597233596 |
| 3395 | ENSG00000130402 | 0,094138284  | 6,433267535 | 0,229816  | 0,63616519  |
| 3396 | ENSG00000130413 | -0,166343969 | 4,899634099 | 0,371424  | 0,548173895 |
| 3397 | ENSG00000130414 | -0,219442039 | 7,210177471 | 2,1848217 | 0,152841251 |
| 3398 | ENSG00000130449 | -0,180045579 | 4,145471557 | 0,9563567 | 0,338232191 |
| 3399 | ENSG00000130508 | 0,143653292  | 5,379325629 | 0,2402187 | 0,628668505 |
| 3400 | ENSG00000130517 | 0,299911986  | 4,906620341 | 3,2372631 | 0,085051903 |
| 3401 | ENSG00000130520 | -0,10037521  | 4,751289513 | 0,4574794 | 0,505507702 |
| 3402 | ENSG00000130522 | 0,179867428  | 5,584885775 | 0,9824147 | 0,33186719  |
| 3403 | ENSG00000130528 | -0,546612327 | 9,008405758 | 3,9123857 | 0,059972926 |
| 3404 | ENSG00000130544 | 0,145687575  | 3,757055953 | 1,0699939 | 0,420654477 |
| 3405 | ENSG00000130559 | 0,306041592  | 4,822127648 | 5,4592163 | 0,028461382 |
| 3406 | ENSG00000130560 | -0,291636137 | 5,284655379 | 4,2917723 | 0,049603768 |
| 3407 | ENSG00000130600 | -0,536269119 | 7,004004983 | 4,9103435 | 0,036817486 |
| 3408 | ENSG00000130635 | 0,280042209  | 5,424861041 | 1,0318912 | 0,320231263 |
| 3409 | ENSG00000130638 | 0,043190571  | 6,472736248 | 0,1201139 | 0,732035536 |
| 3410 | ENSG00000130640 | 0,030428293  | 5,027117296 | 0,0408449 | 0,841606009 |
| 3411 | ENSG00000130695 | 0,013410902  | 5,145385615 | 0,0022008 | 0,962985672 |
| 3412 | ENSG00000130702 | 0,018577444  | 5,362976987 | 0,0091056 | 0,924801337 |
| 3413 | ENSG00000130703 | 0,225210676  | 5,383461575 | 2,036861  | 0,16689748  |
| 3414 | ENSG00000130707 | -0,043426301 | 5,323828083 | 0,0215358 | 0,884601343 |
| 3415 | ENSG00000130713 | -0,089284714 | 3,975224466 | 0,5462479 | 0,577969873 |
| 3416 | ENSG00000130714 | 0,202480067  | 4,221599105 | 3,168335  | 0,229511648 |
| 3417 | ENSG00000130723 | 0,286452513  | 6,029128835 | 0,7511344 | 0,39502579  |
| 3418 | ENSG00000130724 | -0,184160418 | 5,633645455 | 1,032595  | 0,320069826 |
| 3419 | ENSG00000130725 | -0,323228547 | 5,001298354 | 3,5817258 | 0,071009421 |
| 3420 | ENSG00000130726 | 0,191625245  | 5,640924927 | 0,7655316 | 0,390604653 |

|      |                 |              |             |           |             |
|------|-----------------|--------------|-------------|-----------|-------------|
| 3421 | ENSG00000130741 | 0,1576359    | 6,771916721 | 1,1831409 | 0,287901047 |
| 3422 | ENSG00000130749 | 0,33825145   | 3,81611898  | 2,9142524 | 0,101201143 |
| 3423 | ENSG00000130764 | 0,000120656  | 5,037840457 | 4,156E-07 | 0,999491121 |
| 3424 | ENSG00000130770 | 0,201749971  | 6,38229659  | 1,4063665 | 0,247709285 |
| 3425 | ENSG00000130779 | -0,055873452 | 7,290507701 | 0,1904078 | 0,66661235  |
| 3426 | ENSG00000130787 | -0,087853815 | 4,922042571 | 0,1527618 | 0,699489414 |
| 3427 | ENSG00000130803 | -0,001411045 | 4,217983055 | 9,789E-05 | 0,992190995 |
| 3428 | ENSG00000130811 | 0,117890037  | 5,644339908 | 0,4773859 | 0,496490038 |
| 3429 | ENSG00000130816 | -0,325777326 | 4,387920749 | 2,2054663 | 0,151034622 |
| 3430 | ENSG00000130818 | 0,178020423  | 5,129751747 | 3,0142254 | 0,095804102 |
| 3431 | ENSG00000130821 | -0,060941196 | 5,886118151 | 0,0718484 | 0,79104203  |
| 3432 | ENSG00000130826 | -0,154787414 | 4,757270849 | 2,0835591 | 0,236585504 |
| 3433 | ENSG00000130830 | -0,490916055 | 4,899032921 | 12,142912 | 0,001985361 |
| 3434 | ENSG00000130844 | 1,232666434  | 5,749491851 | 7,300349  | 0,012691533 |
| 3435 | ENSG00000130856 | 0,007738158  | 4,423246837 | 0,0050289 | 0,979283871 |
| 3436 | ENSG00000130935 | -0,304621295 | 5,241289212 | 2,6285702 | 0,11852019  |
| 3437 | ENSG00000130939 | 0,165110841  | 5,730635904 | 0,6954985 | 0,412836852 |
| 3438 | ENSG00000130940 | -0,110686844 | 3,9241776   | 0,1587537 | 0,693963451 |
| 3439 | ENSG00000130956 | 0,005696298  | 4,469123322 | 0,0021461 | 0,965896648 |
| 3440 | ENSG00000130962 | -0,190339797 | 4,253480537 | 1,7767875 | 0,241695584 |
| 3441 | ENSG00000130985 | 0,125979032  | 6,753318615 | 0,561973  | 0,461029187 |
| 3442 | ENSG00000130988 | -0,240235347 | 3,77523863  | 2,9914842 | 0,196119726 |
| 3443 | ENSG00000131002 | -0,004346038 | 5,295293287 | 8,829E-05 | 0,992583601 |
| 3444 | ENSG00000131013 | 0,122663619  | 5,228592357 | 0,7077727 | 0,408795033 |
| 3445 | ENSG00000131016 | 0,145596961  | 7,461496513 | 0,2700771 | 0,608221791 |
| 3446 | ENSG00000131018 | 0,334751556  | 9,37908917  | 2,3644766 | 0,137667994 |
| 3447 | ENSG00000131023 | 0,104972678  | 5,271163268 | 0,5298037 | 0,473989027 |
| 3448 | ENSG00000131043 | -0,069201986 | 4,324105552 | 0,2118845 | 0,649589631 |
| 3449 | ENSG00000131051 | -0,080353754 | 7,937311424 | 0,2782815 | 0,602840101 |
| 3450 | ENSG00000131069 | -0,356291732 | 6,245148936 | 3,6658335 | 0,067997017 |
| 3451 | ENSG00000131089 | 0,338514497  | 6,014978581 | 3,0972226 | 0,091656679 |
| 3452 | ENSG00000131100 | -0,427800486 | 6,93624547  | 5,2682183 | 0,031124774 |
| 3453 | ENSG00000131115 | -0,037779981 | 3,95216431  | 0,1414707 | 0,845108481 |
| 3454 | ENSG00000131127 | -0,166674709 | 5,511921021 | 1,0013992 | 0,327334386 |
| 3455 | ENSG00000131143 | -0,405926642 | 8,655255035 | 4,4325199 | 0,046297062 |
| 3456 | ENSG00000131148 | -0,230690996 | 3,877488015 | 3,3051673 | 0,194040177 |
| 3457 | ENSG00000131149 | -0,18146893  | 5,630686033 | 0,5964212 | 0,447772196 |
| 3458 | ENSG00000131165 | 0,080533133  | 4,619770894 | 0,2059678 | 0,654179131 |
| 3459 | ENSG00000131171 | 0,086438796  | 6,145375592 | 0,116597  | 0,735839964 |
| 3460 | ENSG00000131174 | -0,788275759 | 8,21293038  | 11,481926 | 0,002515796 |
| 3461 | ENSG00000131236 | 0,129681405  | 5,674562437 | 0,3587737 | 0,555014083 |
| 3462 | ENSG00000131238 | 0,045608051  | 6,015320996 | 0,1008212 | 0,753690825 |
| 3463 | ENSG00000131263 | 0,027957266  | 6,663062103 | 0,0559504 | 0,815091402 |
| 3464 | ENSG00000131269 | -0,217584134 | 5,082945645 | 2,6329765 | 0,118185166 |
| 3465 | ENSG00000131323 | 0,339759069  | 4,250761573 | 5,8001676 | 0,035741719 |
| 3466 | ENSG00000131368 | -0,813445953 | 5,750384721 | 20,850401 | 0,000135768 |
| 3467 | ENSG00000131373 | -0,109250371 | 4,040795862 | 0,5184334 | 0,579678037 |
| 3468 | ENSG00000131374 | 0,172408033  | 6,058126337 | 1,4400685 | 0,242253225 |
| 3469 | ENSG00000131375 | -0,046946862 | 5,922283874 | 0,0929431 | 0,76319679  |
| 3470 | ENSG00000131378 | -0,159319026 | 5,299132276 | 0,6542513 | 0,426845043 |
| 3471 | ENSG00000131381 | 0,151476798  | 5,478672553 | 2,6197755 | 0,139661802 |
| 3472 | ENSG00000131386 | -1,191625194 | 5,332584509 | 6,9193239 | 0,014917656 |
| 3473 | ENSG00000131389 | 1,090323236  | 6,558361371 | 7,3037368 | 0,012673466 |
| 3474 | ENSG00000131408 | -0,002222246 | 5,15961164  | 0,0001999 | 0,988841909 |
| 3475 | ENSG00000131437 | 0,002536636  | 4,49812005  | 0,0004686 | 0,982915381 |
| 3476 | ENSG00000131446 | -0,089954532 | 6,090336361 | 0,2617286 | 0,613788355 |
| 3477 | ENSG00000131459 | -0,543507058 | 5,884354391 | 1,0949172 | 0,306204529 |
| 3478 | ENSG00000131467 | -0,195627831 | 5,268156371 | 2,8093473 | 0,107146254 |
| 3479 | ENSG00000131469 | 0,009207108  | 7,755357569 | 0,0026064 | 0,959722083 |

|      |                 |              |             |           |             |
|------|-----------------|--------------|-------------|-----------|-------------|
| 3480 | ENSG00000131471 | 0,588795356  | 5,720160952 | 1,4775519 | 0,236428574 |
| 3481 | ENSG00000131473 | -0,57574908  | 5,635651661 | 5,9671433 | 0,022628898 |
| 3482 | ENSG00000131475 | -0,181109339 | 4,292636784 | 1,3685286 | 0,253987215 |
| 3483 | ENSG00000131495 | -0,264160868 | 4,844289324 | 1,5990708 | 0,218638029 |
| 3484 | ENSG00000131504 | -0,040131669 | 5,58117523  | 0,0296664 | 0,864748654 |
| 3485 | ENSG00000131507 | 0,11865804   | 6,605991493 | 1,1610096 | 0,292335891 |
| 3486 | ENSG00000131508 | -0,150878836 | 5,684384508 | 1,5711352 | 0,222530603 |
| 3487 | ENSG00000131558 | 0,134266245  | 5,961631702 | 1,6743825 | 0,208409685 |
| 3488 | ENSG00000131620 | 0,482206709  | 4,012458916 | 4,1864237 | 0,052290007 |
| 3489 | ENSG00000131626 | 0,126272354  | 5,279487588 | 0,8970656 | 0,353333881 |
| 3490 | ENSG00000131711 | -0,391690985 | 8,843213731 | 3,3726025 | 0,079184976 |
| 3491 | ENSG00000131724 | 0,340141149  | 5,811074155 | 2,4907855 | 0,128104289 |
| 3492 | ENSG00000131725 | 0,195163827  | 4,645366279 | 2,3556837 | 0,138356603 |
| 3493 | ENSG00000131730 | -0,489610116 | 8,824229236 | 3,4602508 | 0,075633663 |
| 3494 | ENSG00000131732 | 0,078966218  | 3,885616462 | 0,2546267 | 0,623150413 |
| 3495 | ENSG00000131779 | -0,025730642 | 3,958686927 | 0,0391175 | 0,886357162 |
| 3496 | ENSG00000131791 | 0,113397144  | 5,684914048 | 0,3759134 | 0,545785074 |
| 3497 | ENSG00000131828 | -0,554790101 | 7,489820787 | 8,7073698 | 0,007147009 |
| 3498 | ENSG00000131844 | -0,18740203  | 5,939914574 | 1,6139307 | 0,216566885 |
| 3499 | ENSG00000131845 | 0,147547172  | 4,284730348 | 1,3428574 | 0,371882994 |
| 3500 | ENSG00000131849 | 0,049326338  | 3,619306879 | 0,0985511 | 0,859963567 |
| 3501 | ENSG00000131871 | -0,134502786 | 5,05593163  | 1,456145  | 0,278475612 |
| 3502 | ENSG00000131873 | -0,198465462 | 5,372688426 | 1,1617952 | 0,292215009 |
| 3503 | ENSG00000131876 | -0,356192104 | 4,161609231 | 7,0977526 | 0,030454355 |
| 3504 | ENSG00000131931 | -0,194671849 | 3,636398128 | 0,9180732 | 0,359134387 |
| 3505 | ENSG00000131943 | -0,274052168 | 4,922365    | 4,3796068 | 0,047503238 |
| 3506 | ENSG00000131966 | -0,299051298 | 5,879729376 | 3,2977782 | 0,082368854 |
| 3507 | ENSG00000131981 | 0,084074563  | 6,515501849 | 0,2022607 | 0,657091715 |
| 3508 | ENSG00000132002 | 0,677912733  | 5,342839161 | 16,421099 | 0,000490129 |
| 3509 | ENSG00000132122 | -0,024973948 | 4,5186255   | 0,0186548 | 0,892543573 |
| 3510 | ENSG00000132128 | 0,135715283  | 5,27943129  | 0,7034185 | 0,410227979 |
| 3511 | ENSG00000132153 | -0,019727258 | 5,21838435  | 0,0161541 | 0,89996162  |
| 3512 | ENSG00000132155 | -0,338924951 | 7,280820416 | 5,0331738 | 0,034716875 |
| 3513 | ENSG00000132170 | 0,23320366   | 5,081509163 | 0,2681646 | 0,609487238 |
| 3514 | ENSG00000132199 | -0,340695797 | 5,527993288 | 2,0487842 | 0,16571163  |
| 3515 | ENSG00000132205 | -0,691644181 | 4,406079751 | 6,3975485 | 0,018699783 |
| 3516 | ENSG00000132254 | -0,117731355 | 4,170817564 | 0,6490194 | 0,428658426 |
| 3517 | ENSG00000132274 | 0,235611105  | 5,601660862 | 1,0523198 | 0,315590461 |
| 3518 | ENSG00000132275 | -0,087798327 | 4,389662147 | 0,522825  | 0,477762514 |
| 3519 | ENSG00000132286 | -0,026429092 | 4,461683555 | 0,0637912 | 0,857163116 |
| 3520 | ENSG00000132294 | 0,066484076  | 6,620291877 | 0,2293583 | 0,636484157 |
| 3521 | ENSG00000132300 | -0,062360745 | 6,931070778 | 0,1033664 | 0,750716108 |
| 3522 | ENSG00000132305 | -0,226869498 | 7,278413892 | 1,7354191 | 0,200631131 |
| 3523 | ENSG00000132313 | -0,345519067 | 6,354148514 | 1,9638681 | 0,174385816 |
| 3524 | ENSG00000132323 | -0,014787088 | 4,494457522 | 0,0105126 | 0,919217276 |
| 3525 | ENSG00000132326 | 1,024856947  | 4,029095183 | 17,370312 | 0,000367502 |
| 3526 | ENSG00000132329 | -0,490315801 | 5,784856243 | 2,8002694 | 0,107730857 |
| 3527 | ENSG00000132334 | -0,250695936 | 5,07130753  | 1,83135   | 0,189056865 |
| 3528 | ENSG00000132341 | -0,208322897 | 6,948168669 | 1,6102826 | 0,21708301  |
| 3529 | ENSG00000132356 | -0,167308241 | 5,984298392 | 1,378218  | 0,252335552 |
| 3530 | ENSG00000132357 | 0,056824178  | 4,376112387 | 0,0843387 | 0,774091442 |
| 3531 | ENSG00000132359 | -0,982815732 | 5,619747377 | 10,098873 | 0,004177632 |
| 3532 | ENSG00000132361 | 0,035810329  | 5,738125015 | 0,0229762 | 0,880834301 |
| 3533 | ENSG00000132376 | 0,073771143  | 4,485687854 | 0,2767169 | 0,637168869 |
| 3534 | ENSG00000132383 | -0,041595529 | 5,720565355 | 0,0941544 | 0,761698575 |
| 3535 | ENSG00000132386 | -0,297184521 | 7,562633654 | 2,0796083 | 0,162692873 |
| 3536 | ENSG00000132388 | 0,019695914  | 5,41003891  | 0,0281424 | 0,868228681 |
| 3537 | ENSG00000132405 | -0,02583059  | 4,655968216 | 0,0402413 | 0,842758134 |
| 3538 | ENSG00000132406 | 0,06898213   | 3,709369602 | 0,2923053 | 0,70427588  |

|      |                 |              |             |           |             |
|------|-----------------|--------------|-------------|-----------|-------------|
| 3539 | ENSG00000132423 | -0,695733084 | 4,197764592 | 10,311796 | 0,003857537 |
| 3540 | ENSG00000132424 | -0,036452074 | 7,371159701 | 0,072542  | 0,790052497 |
| 3541 | ENSG00000132429 | -0,645936518 | 4,670490421 | 7,2957783 | 0,012715954 |
| 3542 | ENSG00000132432 | -0,470277568 | 5,309812066 | 3,0153138 | 0,09579414  |
| 3543 | ENSG00000132434 | 0,025728389  | 4,014346418 | 0,0435054 | 0,912297185 |
| 3544 | ENSG00000132436 | 0,134646487  | 3,616677935 | 0,8039007 | 0,467499311 |
| 3545 | ENSG00000132463 | -0,320087256 | 6,719079259 | 6,7112888 | 0,016287403 |
| 3546 | ENSG00000132466 | -0,036247032 | 7,272829933 | 0,116169  | 0,736295335 |
| 3547 | ENSG00000132467 | -0,064470101 | 4,308578973 | 0,2498077 | 0,703922333 |
| 3548 | ENSG00000132471 | 0,161960409  | 5,590279604 | 1,0639412 | 0,312991377 |
| 3549 | ENSG00000132475 | 0,041406397  | 7,728202572 | 0,0611365 | 0,806887607 |
| 3550 | ENSG00000132478 | -0,096279123 | 3,924622994 | 0,6943874 | 0,547032645 |
| 3551 | ENSG00000132485 | -0,148573371 | 6,342848903 | 0,7743078 | 0,387945614 |
| 3552 | ENSG00000132507 | -0,193485139 | 6,078178282 | 1,5724913 | 0,222370383 |
| 3553 | ENSG00000132530 | 0,394602088  | 3,812544547 | 2,4873524 | 0,128354525 |
| 3554 | ENSG00000132541 | -0,345044771 | 4,300351243 | 1,7107677 | 0,203745873 |
| 3555 | ENSG00000132549 | 0,068945084  | 6,782793496 | 0,3626823 | 0,552862868 |
| 3556 | ENSG00000132561 | 0,774275505  | 6,686238856 | 4,0258844 | 0,056645284 |
| 3557 | ENSG00000132570 | 0,048745211  | 4,120044886 | 0,0884734 | 0,797416705 |
| 3558 | ENSG00000132581 | -0,214947148 | 4,544195194 | 2,5551156 | 0,123473019 |
| 3559 | ENSG00000132589 | -0,16893611  | 5,512740535 | 0,8647524 | 0,362023603 |
| 3560 | ENSG00000132600 | 0,165424885  | 4,157203031 | 0,7724784 | 0,388497672 |
| 3561 | ENSG00000132604 | 0,15650599   | 4,17138911  | 1,2183118 | 0,368036719 |
| 3562 | ENSG00000132612 | -0,103645615 | 4,822399914 | 0,332067  | 0,570014062 |
| 3563 | ENSG00000132640 | -0,137690817 | 5,216769319 | 0,8063569 | 0,378458952 |
| 3564 | ENSG00000132646 | -0,187018992 | 4,250913091 | 2,052867  | 0,249073863 |
| 3565 | ENSG00000132664 | -0,026065351 | 3,715814437 | 0,0309766 | 0,94019431  |
| 3566 | ENSG00000132669 | 0,021085892  | 6,019660016 | 0,034202  | 0,854885482 |
| 3567 | ENSG00000132670 | 0,364932636  | 5,481951356 | 8,9461417 | 0,006488834 |
| 3568 | ENSG00000132676 | -0,202523403 | 6,185818602 | 2,0351974 | 0,167028434 |
| 3569 | ENSG00000132680 | -0,090650835 | 5,110253835 | 0,3303575 | 0,57100154  |
| 3570 | ENSG00000132688 | 0,42534241   | 8,609844167 | 2,4104143 | 0,134117165 |
| 3571 | ENSG00000132694 | 0,088624854  | 5,42276253  | 0,1574449 | 0,695159975 |
| 3572 | ENSG00000132716 | 0,097590353  | 5,592051064 | 0,4597941 | 0,504443307 |
| 3573 | ENSG00000132718 | 0,130489345  | 5,12377335  | 0,4605781 | 0,504093155 |
| 3574 | ENSG00000132763 | -0,250255928 | 3,891847653 | 2,0338935 | 0,167194214 |
| 3575 | ENSG00000132780 | -0,10634754  | 5,856482014 | 0,6163127 | 0,440366578 |
| 3576 | ENSG00000132792 | -0,185240684 | 4,999477282 | 2,4576817 | 0,1304943   |
| 3577 | ENSG00000132819 | -0,649307766 | 5,244564539 | 4,0003535 | 0,057375142 |
| 3578 | ENSG00000132821 | -0,531921178 | 5,055961774 | 2,8482284 | 0,104925335 |
| 3579 | ENSG00000132823 | -0,016379529 | 4,944454527 | 0,016527  | 0,994590446 |
| 3580 | ENSG00000132824 | 0,082093388  | 7,171450767 | 0,6515066 | 0,427774695 |
| 3581 | ENSG00000132840 | -0,566431318 | 4,044837871 | 7,4981103 | 0,01168297  |
| 3582 | ENSG00000132842 | 0,112339857  | 5,721993393 | 1,2497615 | 0,275044002 |
| 3583 | ENSG00000132849 | -0,374825685 | 7,125080109 | 3,6040096 | 0,070196711 |
| 3584 | ENSG00000132912 | -0,055133821 | 6,148478843 | 0,3896548 | 0,583836103 |
| 3585 | ENSG00000132938 | -0,285796499 | 5,877929331 | 1,1508586 | 0,294443164 |
| 3586 | ENSG00000132950 | 0,036027529  | 4,168084607 | 0,0668872 | 0,798207373 |
| 3587 | ENSG00000132952 | -0,04966456  | 4,590757394 | 0,1681192 | 0,775064796 |
| 3588 | ENSG00000132953 | 0,034227719  | 5,838478235 | 0,0611356 | 0,806886843 |
| 3589 | ENSG00000132963 | -0,629167304 | 6,36119404  | 7,6085906 | 0,011158317 |
| 3590 | ENSG00000132964 | 0,253391117  | 4,131155287 | 2,3513119 | 0,138753026 |
| 3591 | ENSG00000132967 | -0,059600029 | 5,995780847 | 0,0848259 | 0,773458701 |
| 3592 | ENSG00000132970 | -0,19934642  | 3,788727958 | 1,0862009 | 0,308093887 |
| 3593 | ENSG00000133026 | 1,341257731  | 7,228184893 | 17,257228 | 0,000380178 |
| 3594 | ENSG00000133028 | -0,126229084 | 5,178307377 | 1,3582794 | 0,285597993 |
| 3595 | ENSG00000133030 | 0,202423135  | 7,419954281 | 1,1738325 | 0,289788586 |
| 3596 | ENSG00000133056 | 0,055997257  | 4,757042997 | 0,0810085 | 0,778469944 |
| 3597 | ENSG00000133059 | 0,09588801   | 4,822337612 | 0,3813235 | 0,542932446 |

|      |                 |              |             |           |             |
|------|-----------------|--------------|-------------|-----------|-------------|
| 3598 | ENSG00000133065 | -0,333508149 | 7,549712874 | 1,4718864 | 0,237302016 |
| 3599 | ENSG00000133083 | -1,057235683 | 5,831060689 | 10,279573 | 0,003904202 |
| 3600 | ENSG00000133103 | 0,006634365  | 5,529296047 | 0,0008778 | 0,976618541 |
| 3601 | ENSG00000133104 | -0,098983189 | 6,267008855 | 0,424802  | 0,520979673 |
| 3602 | ENSG00000133110 | 1,80015415   | 6,498933148 | 9,1427076 | 0,006023153 |
| 3603 | ENSG00000133112 | 0,086440467  | 10,54868795 | 0,1090725 | 0,74417173  |
| 3604 | ENSG00000133114 | 0,066229066  | 4,70394134  | 0,3984634 | 0,59772969  |
| 3605 | ENSG00000133121 | -0,357309296 | 5,669098922 | 9,5830096 | 0,005067402 |
| 3606 | ENSG00000133131 | 0,57737093   | 4,18936609  | 6,369361  | 0,018932485 |
| 3607 | ENSG00000133138 | 0,26234065   | 4,076617009 | 2,959395  | 0,098743252 |
| 3608 | ENSG00000133142 | -0,13533596  | 5,882626149 | 0,929813  | 0,344861542 |
| 3609 | ENSG00000133226 | 0,132148688  | 6,108993279 | 0,8993881 | 0,352729142 |
| 3610 | ENSG00000133302 | -0,174845031 | 4,246921603 | 0,9129811 | 0,349212501 |
| 3611 | ENSG00000133313 | -0,188016736 | 5,385218305 | 1,3579574 | 0,255777768 |
| 3612 | ENSG00000133318 | 0,010298831  | 6,470964465 | 0,0030146 | 0,956685919 |
| 3613 | ENSG00000133392 | -0,00616584  | 7,261314206 | 0,0003514 | 0,985204561 |
| 3614 | ENSG00000133393 | -0,100102724 | 4,830963075 | 0,6128492 | 0,531684109 |
| 3615 | ENSG00000133401 | 0,018426142  | 6,768799355 | 0,0072668 | 0,932800455 |
| 3616 | ENSG00000133422 | -0,068873258 | 4,584011466 | 0,1077926 | 0,745627298 |
| 3617 | ENSG00000133424 | -0,053802409 | 6,306411045 | 0,0545341 | 0,817409335 |
| 3618 | ENSG00000133454 | 0,311953778  | 7,536852182 | 0,7985587 | 0,380735599 |
| 3619 | ENSG00000133460 | -0,226528307 | 3,922408347 | 1,1897942 | 0,286612331 |
| 3620 | ENSG00000133561 | -0,174833838 | 5,45039599  | 1,2971598 | 0,266400017 |
| 3621 | ENSG00000133574 | -0,168131205 | 5,205115568 | 0,6636192 | 0,423599749 |
| 3622 | ENSG00000133606 | 0,126898031  | 6,367450243 | 1,0968699 | 0,305745968 |
| 3623 | ENSG00000133624 | -0,203456558 | 4,026093704 | 1,30944   | 0,264208871 |
| 3624 | ENSG00000133639 | 0,204322542  | 6,996540863 | 2,1604913 | 0,155034889 |
| 3625 | ENSG00000133641 | 0,067100142  | 4,198359857 | 0,0848947 | 0,773369632 |
| 3626 | ENSG00000133657 | 0,32493601   | 8,175847675 | 1,9334796 | 0,177623499 |
| 3627 | ENSG00000133687 | -0,594090666 | 6,761332893 | 10,873357 | 0,003135218 |
| 3628 | ENSG00000133703 | -0,127010734 | 4,984752282 | 0,7312077 | 0,401269418 |
| 3629 | ENSG00000133704 | 0,112633815  | 5,751185739 | 1,5054502 | 0,232144009 |
| 3630 | ENSG00000133706 | -0,128412603 | 6,953183909 | 0,6999217 | 0,411376734 |
| 3631 | ENSG00000133731 | -0,583179376 | 5,366443061 | 3,1485712 | 0,089168388 |
| 3632 | ENSG00000133739 | 0,227088993  | 4,008989097 | 1,401117  | 0,248568239 |
| 3633 | ENSG00000133773 | -0,097746389 | 4,296074403 | 0,4360048 | 0,619931696 |
| 3634 | ENSG00000133789 | 0,095022703  | 5,752419113 | 0,5787292 | 0,454475812 |
| 3635 | ENSG00000133794 | -1,057971337 | 4,019907233 | 30,683422 | 1,21609E-05 |
| 3636 | ENSG00000133800 | -1,356269027 | 6,556875381 | 22,413385 | 8,92244E-05 |
| 3637 | ENSG00000133812 | -0,049215388 | 6,312553379 | 0,2480331 | 0,623152891 |
| 3638 | ENSG00000133816 | 0,870888758  | 6,580950443 | 19,707415 | 0,000186466 |
| 3639 | ENSG00000133818 | 0,216034602  | 5,275313285 | 0,9131561 | 0,349167197 |
| 3640 | ENSG00000133835 | -0,238367099 | 7,016470857 | 2,774155  | 0,109257022 |
| 3641 | ENSG00000133858 | 0,166579184  | 6,118153852 | 0,7626717 | 0,391477018 |
| 3642 | ENSG00000133872 | 0,205021897  | 7,319973984 | 2,3978175 | 0,135042513 |
| 3643 | ENSG00000133878 | 0,079703379  | 4,79043958  | 0,1254096 | 0,726450183 |
| 3644 | ENSG00000133884 | 0,09318521   | 4,832894002 | 0,2070789 | 0,653312387 |
| 3645 | ENSG00000133943 | 0,064048418  | 6,758310735 | 0,0852453 | 0,772915732 |
| 3646 | ENSG00000133961 | 0,042840657  | 5,369188245 | 0,0879206 | 0,769481879 |
| 3647 | ENSG00000133997 | -0,022515618 | 4,217453844 | 0,043512  | 0,916892479 |
| 3648 | ENSG00000134001 | -0,290016447 | 6,168538344 | 3,3059069 | 0,08201593  |
| 3649 | ENSG00000134014 | 0,024314562  | 5,041944509 | 0,0652854 | 0,800581352 |
| 3650 | ENSG00000134020 | -0,44462721  | 5,631871826 | 2,1524949 | 0,155814659 |
| 3651 | ENSG00000134030 | 0,195457115  | 5,031023228 | 0,817867  | 0,375134889 |
| 3652 | ENSG00000134046 | 0,04867374   | 5,622061382 | 0,103656  | 0,750379454 |
| 3653 | ENSG00000134049 | -0,54071421  | 4,863990144 | 4,0848254 | 0,055000195 |
| 3654 | ENSG00000134056 | -0,719380354 | 5,655575297 | 6,0272746 | 0,022028513 |
| 3655 | ENSG00000134077 | -0,208207235 | 5,000093583 | 3,9268798 | 0,08311977  |
| 3656 | ENSG00000134107 | 0,279277627  | 5,854949442 | 0,8815492 | 0,35748686  |

|      |                 |              |             |           |             |
|------|-----------------|--------------|-------------|-----------|-------------|
| 3657 | ENSG00000134108 | 0,004968168  | 6,314075535 | 0,0013339 | 0,9711781   |
| 3658 | ENSG00000134109 | 0,340717142  | 4,85618381  | 4,1583659 | 0,053023035 |
| 3659 | ENSG00000134121 | -1,188822437 | 6,02299841  | 17,18936  | 0,000388014 |
| 3660 | ENSG00000134138 | 0,463828146  | 4,983574009 | 3,1722023 | 0,08804954  |
| 3661 | ENSG00000134146 | -0,269736133 | 4,419611331 | 1,4113704 | 0,246894083 |
| 3662 | ENSG00000134152 | -0,026463129 | 4,673130785 | 0,0218223 | 0,883842065 |
| 3663 | ENSG00000134153 | -0,328096044 | 5,084451551 | 10,133077 | 0,005022286 |
| 3664 | ENSG00000134186 | -0,020505206 | 5,189990764 | 0,021266  | 0,885318591 |
| 3665 | ENSG00000134202 | -0,32464659  | 5,658601316 | 2,806135  | 0,10738307  |
| 3666 | ENSG00000134243 | 0,037443555  | 7,911317025 | 0,0507847 | 0,823678972 |
| 3667 | ENSG00000134245 | -0,09398206  | 4,033054185 | 0,283239  | 0,599665333 |
| 3668 | ENSG00000134247 | -0,142909856 | 7,222672922 | 0,6473272 | 0,429268661 |
| 3669 | ENSG00000134248 | -0,40876795  | 5,266453187 | 7,4451389 | 0,011940636 |
| 3670 | ENSG00000134250 | 0,439950067  | 7,251499075 | 3,8312501 | 0,062488023 |
| 3671 | ENSG00000134253 | 0,185455606  | 4,013925849 | 0,6975776 | 0,41214954  |
| 3672 | ENSG00000134255 | -0,066014875 | 4,876145312 | 0,164077  | 0,689155018 |
| 3673 | ENSG00000134262 | 0,070435637  | 3,898417099 | 0,320343  | 0,722582069 |
| 3674 | ENSG00000134265 | -0,106257166 | 5,814696274 | 0,3379315 | 0,566652213 |
| 3675 | ENSG00000134278 | 0,276107712  | 5,29208678  | 3,0343773 | 0,094812193 |
| 3676 | ENSG00000134283 | -0,088851568 | 5,202866336 | 0,5642927 | 0,49666697  |
| 3677 | ENSG00000134287 | 0,294471081  | 5,103630568 | 2,3471075 | 0,139090011 |
| 3678 | ENSG00000134291 | -0,151665406 | 5,458902008 | 1,3702762 | 0,253651553 |
| 3679 | ENSG00000134294 | 0,256218358  | 8,077649447 | 0,4906945 | 0,49060977  |
| 3680 | ENSG00000134308 | 0,400540471  | 7,187272978 | 11,282276 | 0,002693734 |
| 3681 | ENSG00000134313 | 0,210807074  | 7,155824918 | 4,3443488 | 0,048331776 |
| 3682 | ENSG00000134318 | -0,044695413 | 7,12108444  | 0,0956632 | 0,75986054  |
| 3683 | ENSG00000134321 | 0,087527249  | 3,808634307 | 0,0787181 | 0,781538267 |
| 3684 | ENSG00000134324 | -0,230931572 | 5,86194569  | 1,2534835 | 0,274388477 |
| 3685 | ENSG00000134330 | -0,09809595  | 5,115631841 | 0,7418085 | 0,411452237 |
| 3686 | ENSG00000134333 | -0,467550158 | 8,249644372 | 6,5733319 | 0,017302503 |
| 3687 | ENSG00000134352 | 0,056140441  | 8,87582266  | 0,0453359 | 0,83325441  |
| 3688 | ENSG00000134369 | 0,009582805  | 5,770059965 | 0,001107  | 0,973743917 |
| 3689 | ENSG00000134371 | 0,04752051   | 6,171291252 | 0,1720835 | 0,682078679 |
| 3690 | ENSG00000134375 | -0,859914298 | 6,048680697 | 16,827222 | 0,000432918 |
| 3691 | ENSG00000134419 | 0,211504895  | 7,130390915 | 0,7665459 | 0,390295951 |
| 3692 | ENSG00000134440 | -0,058284279 | 7,193268139 | 0,0985719 | 0,756366458 |
| 3693 | ENSG00000134444 | -0,075213359 | 5,543767461 | 0,4084619 | 0,529013071 |
| 3694 | ENSG00000134452 | -0,059200109 | 5,894977009 | 0,1438508 | 0,707944661 |
| 3695 | ENSG00000134453 | -0,289769954 | 5,705056092 | 6,5845386 | 0,017207603 |
| 3696 | ENSG00000134463 | 0,013983756  | 4,426976715 | 0,002326  | 0,961948352 |
| 3697 | ENSG00000134480 | -0,226066925 | 5,431795582 | 2,3166053 | 0,141564135 |
| 3698 | ENSG00000134504 | -0,108412223 | 4,225668463 | 0,3491673 | 0,560319549 |
| 3699 | ENSG00000134516 | 0,13704622   | 4,51897464  | 0,2560751 | 0,617622288 |
| 3700 | ENSG00000134531 | -0,031696344 | 7,443422918 | 0,0160183 | 0,900380542 |
| 3701 | ENSG00000134532 | -0,256136129 | 4,301677626 | 2,1886388 | 0,152533782 |
| 3702 | ENSG00000134569 | 0,087282674  | 4,706733679 | 0,0695575 | 0,794319289 |
| 3703 | ENSG00000134571 | -0,029577836 | 10,26850995 | 0,0108088 | 0,918093549 |
| 3704 | ENSG00000134575 | -0,118144686 | 4,012720981 | 0,5316515 | 0,47323802  |
| 3705 | ENSG00000134590 | -0,070465557 | 6,137366817 | 0,1589704 | 0,693765906 |
| 3706 | ENSG00000134597 | -0,018890853 | 3,822662357 | 0,0280794 | 0,943271162 |
| 3707 | ENSG00000134644 | 0,154889701  | 6,251695672 | 1,8779217 | 0,183689195 |
| 3708 | ENSG00000134684 | -0,535512469 | 5,245684076 | 8,388388  | 0,008116893 |
| 3709 | ENSG00000134686 | -0,347848701 | 5,987674275 | 3,7384544 | 0,065512994 |
| 3710 | ENSG00000134697 | -0,134587864 | 5,194130465 | 0,9433835 | 0,341436466 |
| 3711 | ENSG00000134698 | 0,002055449  | 5,83033213  | 0,000214  | 0,988453895 |
| 3712 | ENSG00000134709 | -0,14771089  | 4,357647406 | 0,279388  | 0,602141895 |
| 3713 | ENSG00000134716 | 0,170052396  | 6,693931639 | 0,2503934 | 0,621529629 |
| 3714 | ENSG00000134717 | -0,082675027 | 5,457824698 | 0,3267944 | 0,573063014 |
| 3715 | ENSG00000134744 | 0,030498625  | 6,077820733 | 0,0597337 | 0,809066514 |



|      |                 |              |             |           |             |
|------|-----------------|--------------|-------------|-----------|-------------|
| 3716 | ENSG00000134748 | 0,044159819  | 4,671339031 | 0,1520246 | 0,705845414 |
| 3717 | ENSG00000134755 | -0,247906464 | 5,510318621 | 3,4239491 | 0,077036867 |
| 3718 | ENSG00000134758 | 0,07484715   | 4,389320535 | 0,1168695 | 0,735543791 |
| 3719 | ENSG00000134759 | 0,13812256   | 6,245247943 | 1,4417255 | 0,241979856 |
| 3720 | ENSG00000134765 | -0,136218473 | 6,340327518 | 0,1384446 | 0,713221961 |
| 3721 | ENSG00000134769 | -0,508244552 | 7,121049422 | 5,7727858 | 0,0246976   |
| 3722 | ENSG00000134775 | -0,042073584 | 6,995543144 | 0,0179853 | 0,894477116 |
| 3723 | ENSG00000134779 | -0,042299998 | 5,304518032 | 0,1024986 | 0,751717919 |
| 3724 | ENSG00000134802 | -0,483534483 | 4,138822683 | 5,1337638 | 0,033139096 |
| 3725 | ENSG00000134817 | 0,23657018   | 4,641540673 | 0,2942859 | 0,592679857 |
| 3726 | ENSG00000134824 | -0,61683766  | 4,789920335 | 3,8681851 | 0,061328503 |
| 3727 | ENSG00000134825 | -0,113487293 | 4,951990687 | 0,5123605 | 0,481288433 |
| 3728 | ENSG00000134851 | -0,179355731 | 6,068869299 | 0,9673848 | 0,335517848 |
| 3729 | ENSG00000134852 | -0,103617075 | 6,621130365 | 0,6195815 | 0,439172583 |
| 3730 | ENSG00000134853 | -0,279206414 | 6,946265726 | 1,3374619 | 0,259296118 |
| 3731 | ENSG00000134871 | -0,110480696 | 7,545426153 | 0,2071078 | 0,65328984  |
| 3732 | ENSG00000134874 | 0,36176603   | 3,918610112 | 2,7477937 | 0,110901509 |
| 3733 | ENSG00000134882 | -0,070234691 | 5,120209805 | 0,4788935 | 0,522712591 |
| 3734 | ENSG00000134884 | 0,121876786  | 6,835577467 | 0,5729102 | 0,456751884 |
| 3735 | ENSG00000134897 | -0,148065911 | 4,910577485 | 1,0515865 | 0,315740532 |
| 3736 | ENSG00000134900 | -0,140008739 | 6,543634932 | 1,1281309 | 0,299108981 |
| 3737 | ENSG00000134905 | 0,094579941  | 4,862000012 | 0,645919  | 0,479993644 |
| 3738 | ENSG00000134909 | 0,283648919  | 4,656924018 | 1,6427802 | 0,212653473 |
| 3739 | ENSG00000134910 | -0,045031972 | 6,436151546 | 0,1568198 | 0,695720878 |
| 3740 | ENSG00000134954 | -0,113627486 | 6,211915302 | 0,4854331 | 0,492920061 |
| 3741 | ENSG00000134970 | -0,191690386 | 6,746045924 | 0,5144367 | 0,480410952 |
| 3742 | ENSG00000134982 | -0,062864775 | 6,863875212 | 0,1584376 | 0,694251908 |
| 3743 | ENSG00000134986 | 0,276601366  | 3,626717823 | 0,8981173 | 0,353091031 |
| 3744 | ENSG00000134987 | -0,10357133  | 5,564280378 | 0,3391684 | 0,565948146 |
| 3745 | ENSG00000134996 | -0,063686031 | 4,592919444 | 0,2792978 | 0,68508225  |
| 3746 | ENSG00000135002 | -0,198234141 | 4,733928013 | 1,3418428 | 0,258538816 |
| 3747 | ENSG00000135018 | 0,069995254  | 6,819441369 | 0,4000904 | 0,533229244 |
| 3748 | ENSG00000135040 | -0,047407093 | 5,206063238 | 0,199977  | 0,664278087 |
| 3749 | ENSG00000135046 | 0,288910193  | 7,386425282 | 0,7357566 | 0,399831135 |
| 3750 | ENSG00000135047 | -0,670063862 | 6,84231435  | 19,669476 | 0,00018773  |
| 3751 | ENSG00000135048 | -0,32935768  | 5,460740618 | 0,8488835 | 0,366386059 |
| 3752 | ENSG00000135049 | -0,581550025 | 6,803085136 | 4,5170787 | 0,044461429 |
| 3753 | ENSG00000135052 | 0,502067557  | 4,367503224 | 4,9103119 | 0,036818038 |
| 3754 | ENSG00000135063 | 0,050545444  | 4,894398196 | 0,0387852 | 0,845596406 |
| 3755 | ENSG00000135070 | -0,191281537 | 5,969744672 | 1,6661053 | 0,209527368 |
| 3756 | ENSG00000135074 | -0,280256763 | 5,957743182 | 0,8331619 | 0,370783221 |
| 3757 | ENSG00000135090 | 0,074200246  | 5,197035983 | 0,5725057 | 0,456882445 |
| 3758 | ENSG00000135093 | 0,248837443  | 3,890983555 | 6,046247  | 0,16167369  |
| 3759 | ENSG00000135108 | -0,049612947 | 6,153052051 | 0,1185183 | 0,733752192 |
| 3760 | ENSG00000135111 | -0,886902476 | 4,055987055 | 17,127763 | 0,000395278 |
| 3761 | ENSG00000135148 | 0,238742453  | 4,844118783 | 3,3604906 | 0,079645344 |
| 3762 | ENSG00000135164 | 0,081720661  | 6,309592419 | 0,4127021 | 0,526900891 |
| 3763 | ENSG00000135205 | 0,102982965  | 4,30110043  | 0,2420377 | 0,627378537 |
| 3764 | ENSG00000135218 | -0,353179539 | 9,660313006 | 1,3739863 | 0,253069132 |
| 3765 | ENSG00000135241 | -0,316273198 | 6,134592668 | 1,536264  | 0,227613119 |
| 3766 | ENSG00000135249 | -0,090328176 | 3,891225255 | 0,697102  | 0,612165547 |
| 3767 | ENSG00000135250 | 0,143836081  | 5,342196963 | 2,0417079 | 0,166367903 |
| 3768 | ENSG00000135269 | -0,404074272 | 4,60185821  | 5,4891872 | 0,02810488  |
| 3769 | ENSG00000135272 | 0,451180307  | 5,706948644 | 3,5191417 | 0,073350104 |
| 3770 | ENSG00000135297 | -0,075953447 | 4,676409057 | 0,678652  | 0,551916305 |
| 3771 | ENSG00000135299 | 0,101633163  | 3,85316997  | 0,583828  | 0,572184519 |
| 3772 | ENSG00000135315 | 0,23153696   | 4,239877279 | 1,8180889 | 0,190606859 |
| 3773 | ENSG00000135316 | 0,062053282  | 7,066662077 | 0,2259649 | 0,638978287 |
| 3774 | ENSG00000135317 | -0,09160695  | 5,64013466  | 0,4700787 | 0,499747132 |

|      |                 |              |             |           |             |
|------|-----------------|--------------|-------------|-----------|-------------|
| 3775 | ENSG00000135318 | 0,485552539  | 4,23639367  | 5,2945134 | 0,030747063 |
| 3776 | ENSG00000135333 | 0,078530888  | 4,87499507  | 0,0925124 | 0,763728681 |
| 3777 | ENSG00000135334 | 0,02192272   | 4,396193723 | 0,0369693 | 0,901931319 |
| 3778 | ENSG00000135336 | -0,209472532 | 5,429299023 | 0,7372299 | 0,399366966 |
| 3779 | ENSG00000135338 | 0,174063815  | 3,711871083 | 0,7215116 | 0,404361266 |
| 3780 | ENSG00000135341 | 0,017365347  | 5,884425217 | 0,0158849 | 0,900790476 |
| 3781 | ENSG00000135365 | -0,050079848 | 5,377561833 | 0,1130566 | 0,739724312 |
| 3782 | ENSG00000135372 | 0,08337992   | 4,594765304 | 0,1901677 | 0,666823216 |
| 3783 | ENSG00000135387 | 0,110043249  | 7,327643318 | 1,309937  | 0,264080212 |
| 3784 | ENSG00000135390 | -0,357494245 | 7,09148083  | 4,3484056 | 0,048275756 |
| 3785 | ENSG00000135404 | -0,149459997 | 8,770598227 | 1,1273402 | 0,299274442 |
| 3786 | ENSG00000135414 | -0,505227787 | 4,643415062 | 5,5575117 | 0,027238478 |
| 3787 | ENSG00000135424 | -0,159027259 | 8,124567864 | 0,3974261 | 0,534605602 |
| 3788 | ENSG00000135441 | -0,171529246 | 3,73934895  | 0,8281191 | 0,372209831 |
| 3789 | ENSG00000135446 | 0,265295666  | 4,200395948 | 4,003432  | 0,104107443 |
| 3790 | ENSG00000135447 | -0,820057425 | 6,204352115 | 6,2243947 | 0,020181204 |
| 3791 | ENSG00000135452 | -0,044965716 | 4,606307864 | 0,206209  | 0,680510211 |
| 3792 | ENSG00000135457 | 0,110954988  | 4,674158819 | 0,9850395 | 0,436005956 |
| 3793 | ENSG00000135469 | -0,715295142 | 5,760569824 | 8,6347755 | 0,00735596  |
| 3794 | ENSG00000135473 | 0,051293608  | 4,964003572 | 0,064876  | 0,801201518 |
| 3795 | ENSG00000135486 | 0,286075861  | 8,145953564 | 4,8380407 | 0,03806718  |
| 3796 | ENSG00000135503 | -0,16014198  | 4,171933263 | 0,6267282 | 0,436607763 |
| 3797 | ENSG00000135506 | 0,14522154   | 6,602303156 | 1,0053701 | 0,326370537 |
| 3798 | ENSG00000135521 | -0,307727962 | 3,719890909 | 4,2740424 | 0,114017525 |
| 3799 | ENSG00000135535 | 0,015078172  | 7,53064814  | 0,004901  | 0,944790095 |
| 3800 | ENSG00000135537 | -0,19664175  | 3,69151599  | 0,9536347 | 0,338906885 |
| 3801 | ENSG00000135540 | 0,434224821  | 5,537772529 | 5,8932334 | 0,023391942 |
| 3802 | ENSG00000135541 | 0,103355366  | 5,817583385 | 0,3142305 | 0,580489547 |
| 3803 | ENSG00000135596 | -0,308661821 | 4,011731585 | 2,0058978 | 0,170025344 |
| 3804 | ENSG00000135597 | 0,114959155  | 5,535293444 | 1,4216401 | 0,248722375 |
| 3805 | ENSG00000135617 | -0,447821306 | 4,99649439  | 5,2191171 | 0,031844054 |
| 3806 | ENSG00000135624 | -0,275751442 | 7,025767078 | 4,2926687 | 0,049575878 |
| 3807 | ENSG00000135631 | 0,000348093  | 4,53746823  | 1,799E-06 | 0,998941424 |
| 3808 | ENSG00000135632 | 0,009128491  | 4,022246883 | 0,0035142 | 0,993174825 |
| 3809 | ENSG00000135636 | -0,281311033 | 5,909058156 | 1,0107545 | 0,325132159 |
| 3810 | ENSG00000135655 | -0,220524777 | 6,882799294 | 1,0313612 | 0,320352916 |
| 3811 | ENSG00000135677 | -0,16796084  | 7,360890473 | 2,0577622 | 0,164779094 |
| 3812 | ENSG00000135678 | -0,588741848 | 4,705647545 | 1,2220894 | 0,28032593  |
| 3813 | ENSG00000135679 | 0,077664635  | 5,969634621 | 0,1658111 | 0,687608467 |
| 3814 | ENSG00000135686 | 0,168680713  | 5,223086658 | 0,9705479 | 0,33474491  |
| 3815 | ENSG00000135709 | -0,262774711 | 4,006794403 | 1,1732079 | 0,289913825 |
| 3816 | ENSG00000135720 | 0,285579202  | 6,607134593 | 7,100549  | 0,01378541  |
| 3817 | ENSG00000135744 | -0,010539408 | 6,415514631 | 0,0036395 | 0,952412698 |
| 3818 | ENSG00000135750 | -0,460722619 | 5,553539989 | 4,7012463 | 0,040679527 |
| 3819 | ENSG00000135775 | -0,164724389 | 5,152785376 | 1,5926444 | 0,219492157 |
| 3820 | ENSG00000135776 | 0,178571279  | 4,257080974 | 2,7551341 | 0,235545544 |
| 3821 | ENSG00000135778 | -0,253920846 | 5,181620965 | 3,9751065 | 0,058065109 |
| 3822 | ENSG00000135801 | 0,009826429  | 4,058777325 | 0,0069298 | 0,978346714 |
| 3823 | ENSG00000135821 | -0,915897603 | 8,65691816  | 9,0952971 | 0,006135559 |
| 3824 | ENSG00000135823 | 0,294472907  | 4,563130199 | 7,6509681 | 0,024518351 |
| 3825 | ENSG00000135828 | 0,108518747  | 3,950807849 | 0,3429514 | 0,56380558  |
| 3826 | ENSG00000135829 | 0,041402108  | 6,806490905 | 0,1438183 | 0,707963965 |
| 3827 | ENSG00000135837 | 0,041619668  | 7,156591312 | 0,1672182 | 0,6863473   |
| 3828 | ENSG00000135842 | -0,118319839 | 8,896415273 | 0,2104735 | 0,650681563 |
| 3829 | ENSG00000135845 | -0,044964674 | 4,337787648 | 0,1227963 | 0,841955479 |
| 3830 | ENSG00000135862 | -0,032437537 | 8,168426061 | 0,0350908 | 0,85303594  |
| 3831 | ENSG00000135870 | 0,086531783  | 6,229147113 | 0,3413014 | 0,564730124 |
| 3832 | ENSG00000135899 | 0,064522378  | 3,794265376 | 0,094619  | 0,761139953 |
| 3833 | ENSG00000135900 | -0,167022155 | 4,492506135 | 1,8802998 | 0,201949147 |

|      |                 |              |             |           |             |
|------|-----------------|--------------|-------------|-----------|-------------|
| 3834 | ENSG00000135905 | 0,588316443  | 4,172297342 | 3,9432187 | 0,059047479 |
| 3835 | ENSG00000135913 | 0,034285332  | 4,299811846 | 0,0606877 | 0,807580837 |
| 3836 | ENSG00000135916 | 0,051038486  | 5,039240218 | 0,1071806 | 0,7463239   |
| 3837 | ENSG00000135919 | 0,542649588  | 5,837261399 | 3,3306185 | 0,080953664 |
| 3838 | ENSG00000135924 | 0,199931438  | 5,34783486  | 1,3655363 | 0,254492398 |
| 3839 | ENSG00000135926 | -0,055912883 | 6,664327066 | 0,0747599 | 0,786956782 |
| 3840 | ENSG00000135929 | 0,783912213  | 3,965093181 | 13,700226 | 0,00117005  |
| 3841 | ENSG00000135930 | -0,049232109 | 4,982753212 | 0,2507479 | 0,621267757 |
| 3842 | ENSG00000135932 | -0,179706117 | 6,858853457 | 1,7423005 | 0,199727557 |
| 3843 | ENSG00000135940 | -0,499099117 | 7,894560311 | 4,3580033 | 0,048049065 |
| 3844 | ENSG00000135945 | 0,016618943  | 5,916985568 | 0,0186755 | 0,89248014  |
| 3845 | ENSG00000135956 | 0,06570085   | 6,24791843  | 0,1439676 | 0,707831853 |
| 3846 | ENSG00000135966 | 0,258473138  | 4,237105056 | 2,649463  | 0,117141765 |
| 3847 | ENSG00000135968 | 0,132231549  | 6,251327391 | 1,1110891 | 0,302702727 |
| 3848 | ENSG00000135972 | -0,466177275 | 4,823206337 | 7,9803845 | 0,009574986 |
| 3849 | ENSG00000135974 | 0,126914591  | 4,721865626 | 0,9169028 | 0,348164999 |
| 3850 | ENSG00000135976 | 0,149119516  | 6,775693175 | 0,7873847 | 0,384032977 |
| 3851 | ENSG00000135999 | 0,121763243  | 5,364181672 | 1,6213567 | 0,215516969 |
| 3852 | ENSG00000136003 | -0,156898886 | 7,425500623 | 0,6662402 | 0,422698631 |
| 3853 | ENSG00000136010 | -0,013759911 | 3,94728188  | 0,0041177 | 0,949387261 |
| 3854 | ENSG00000136021 | 0,157829647  | 5,92956869  | 0,7848472 | 0,384787651 |
| 3855 | ENSG00000136026 | 0,200969587  | 5,569112087 | 2,0391178 | 0,166636902 |
| 3856 | ENSG00000136040 | -0,09078939  | 4,701996894 | 0,1956147 | 0,6623952   |
| 3857 | ENSG00000136044 | -0,065000906 | 5,180890879 | 0,1533115 | 0,698977264 |
| 3858 | ENSG00000136045 | -0,023170883 | 4,710458407 | 0,0207207 | 0,886790164 |
| 3859 | ENSG00000136048 | -0,336745289 | 4,041089958 | 2,343754  | 0,139359487 |
| 3860 | ENSG00000136051 | -0,033606145 | 6,579053648 | 0,0290463 | 0,866155229 |
| 3861 | ENSG00000136052 | 1,444248641  | 4,50585509  | 6,9905352 | 0,014470748 |
| 3862 | ENSG00000136068 | 0,06421863   | 6,440134209 | 0,0672376 | 0,797697661 |
| 3863 | ENSG00000136098 | 0,167606964  | 3,928082542 | 1,0861131 | 0,34365375  |
| 3864 | ENSG00000136100 | -0,197139087 | 6,10711079  | 2,2985109 | 0,143009622 |
| 3865 | ENSG00000136104 | -0,24190926  | 5,60948987  | 3,2404259 | 0,084863468 |
| 3866 | ENSG00000136108 | -0,003848526 | 3,893254171 | 0,000404  | 0,984135903 |
| 3867 | ENSG00000136111 | 0,033691068  | 6,922136163 | 0,0270425 | 0,870809606 |
| 3868 | ENSG00000136114 | -0,073869394 | 3,76325401  | 0,2783127 | 0,636571802 |
| 3869 | ENSG00000136141 | 0,053941803  | 4,819656079 | 0,2043118 | 0,659263608 |
| 3870 | ENSG00000136143 | -0,518568386 | 6,781239079 | 4,023396  | 0,056715954 |
| 3871 | ENSG00000136144 | 0,00372053   | 5,077452819 | 0,000555  | 0,981407163 |
| 3872 | ENSG00000136146 | -0,154514475 | 4,827362804 | 1,0415397 | 0,318027812 |
| 3873 | ENSG00000136147 | -0,034575933 | 4,362762697 | 0,0730672 | 0,865835379 |
| 3874 | ENSG00000136149 | 0,254755152  | 5,714560097 | 1,4877382 | 0,23486842  |
| 3875 | ENSG00000136152 | 0,122958684  | 5,416998744 | 1,0180488 | 0,32339313  |
| 3876 | ENSG00000136153 | 0,159853729  | 8,041298277 | 0,4456544 | 0,511017045 |
| 3877 | ENSG00000136156 | 0,141694624  | 8,601472889 | 0,6857731 | 0,416045988 |
| 3878 | ENSG00000136158 | 0,249208824  | 4,841100494 | 3,3099372 | 0,081804541 |
| 3879 | ENSG00000136159 | -0,332860268 | 3,651184511 | 7,4503285 | 0,097722974 |
| 3880 | ENSG00000136160 | -0,712327454 | 5,350384312 | 4,9500382 | 0,036131799 |
| 3881 | ENSG00000136161 | 0,181475711  | 4,955561484 | 1,3840287 | 0,251390983 |
| 3882 | ENSG00000136167 | -0,253695005 | 5,895738851 | 0,6143827 | 0,441101526 |
| 3883 | ENSG00000136169 | 0,103439798  | 5,150821356 | 0,507091  | 0,483522943 |
| 3884 | ENSG00000136193 | 0,36739672   | 5,769672302 | 6,6040165 | 0,017068764 |
| 3885 | ENSG00000136205 | 0,351189344  | 6,425841126 | 3,049127  | 0,094060447 |
| 3886 | ENSG00000136235 | 0,098220078  | 7,290462079 | 0,2368485 | 0,631074718 |
| 3887 | ENSG00000136237 | 0,178764513  | 5,615634326 | 0,7995788 | 0,38043664  |
| 3888 | ENSG00000136238 | -0,041017344 | 6,760658512 | 0,093348  | 0,762688459 |
| 3889 | ENSG00000136240 | 0,071302306  | 6,575914013 | 0,2622361 | 0,613429863 |
| 3890 | ENSG00000136243 | -0,162339478 | 3,791155028 | 1,8698448 | 0,384230497 |
| 3891 | ENSG00000136247 | -0,174625597 | 4,404331388 | 1,324335  | 0,261570322 |
| 3892 | ENSG00000136261 | -0,480746941 | 7,250522406 | 3,4464385 | 0,076180981 |

|      |                 |              |             |           |             |
|------|-----------------|--------------|-------------|-----------|-------------|
| 3893 | ENSG00000136270 | -0,163610442 | 4,984147546 | 0,7085271 | 0,408558487 |
| 3894 | ENSG00000136271 | -0,052688577 | 4,803666657 | 0,1226317 | 0,729367768 |
| 3895 | ENSG00000136273 | 0,018191478  | 4,169013827 | 0,0161883 | 0,987270772 |
| 3896 | ENSG00000136279 | -0,018616251 | 5,377552573 | 0,0127363 | 0,91111982  |
| 3897 | ENSG00000136280 | -0,077905766 | 4,224915582 | 0,229413  | 0,636459819 |
| 3898 | ENSG00000136319 | 0,307442193  | 3,831714115 | 6,3654016 | 0,085844232 |
| 3899 | ENSG00000136378 | 0,287807124  | 5,173073443 | 1,9414729 | 0,176764822 |
| 3900 | ENSG00000136381 | -0,055405332 | 5,970632596 | 0,2659791 | 0,610923294 |
| 3901 | ENSG00000136383 | 0,529585378  | 7,305711708 | 3,0146116 | 0,095830536 |
| 3902 | ENSG00000136436 | -0,485730703 | 7,334747571 | 18,138996 | 0,000290779 |
| 3903 | ENSG00000136444 | -0,179237533 | 4,784566751 | 1,8048605 | 0,192123556 |
| 3904 | ENSG00000136448 | 0,015868956  | 5,829870294 | 0,013175  | 0,909605872 |
| 3905 | ENSG00000136450 | -0,026175558 | 6,160070339 | 0,0178968 | 0,894735553 |
| 3906 | ENSG00000136451 | -0,041683535 | 5,937980253 | 0,1864711 | 0,669857756 |
| 3907 | ENSG00000136463 | -0,3929157   | 4,252005506 | 5,3502295 | 0,029963556 |
| 3908 | ENSG00000136478 | -0,125494172 | 6,01326686  | 1,0501329 | 0,316046163 |
| 3909 | ENSG00000136485 | 0,031360689  | 5,567956534 | 0,0316105 | 0,86043423  |
| 3910 | ENSG00000136504 | 0,025401101  | 5,94585245  | 0,0289396 | 0,866398306 |
| 3911 | ENSG00000136518 | -0,108840523 | 4,166654714 | 0,6435058 | 0,538115639 |
| 3912 | ENSG00000136521 | -0,345519935 | 7,206477246 | 2,0988005 | 0,16084682  |
| 3913 | ENSG00000136522 | -0,562215373 | 5,147084504 | 5,3648871 | 0,029761158 |
| 3914 | ENSG00000136527 | -0,013303782 | 6,704376467 | 0,0091095 | 0,924782512 |
| 3915 | ENSG00000136536 | -0,172590265 | 6,891261014 | 0,6520086 | 0,427627678 |
| 3916 | ENSG00000136546 | -0,356068735 | 7,290856067 | 2,0656983 | 0,164046838 |
| 3917 | ENSG00000136560 | -0,096938392 | 5,351742234 | 0,345924  | 0,562133144 |
| 3918 | ENSG00000136574 | -0,031888787 | 5,782042401 | 0,0272539 | 0,870310575 |
| 3919 | ENSG00000136603 | 0,80448256   | 6,717029955 | 5,0253356 | 0,034870103 |
| 3920 | ENSG00000136628 | -0,136214711 | 7,026544601 | 0,7518231 | 0,394812605 |
| 3921 | ENSG00000136631 | -0,040307204 | 5,904196978 | 0,0579587 | 0,81187453  |
| 3922 | ENSG00000136636 | -0,052932015 | 5,512830464 | 0,1192124 | 0,733012817 |
| 3923 | ENSG00000136643 | -0,005878747 | 5,163082452 | 0,0019792 | 0,964896088 |
| 3924 | ENSG00000136682 | -0,321374915 | 6,049205598 | 4,4381725 | 0,046201761 |
| 3925 | ENSG00000136699 | 0,060552006  | 4,678514544 | 0,1169815 | 0,735422149 |
| 3926 | ENSG00000136709 | -0,093502563 | 6,038626716 | 0,9013889 | 0,352198161 |
| 3927 | ENSG00000136710 | 0,326086841  | 3,882440532 | 7,3603387 | 0,063788632 |
| 3928 | ENSG00000136715 | 0,070179071  | 3,923898737 | 0,1529586 | 0,739770867 |
| 3929 | ENSG00000136718 | -0,094545059 | 4,55956355  | 0,5504817 | 0,465568388 |
| 3930 | ENSG00000136731 | -0,01431311  | 6,410904671 | 0,0160229 | 0,900362593 |
| 3931 | ENSG00000136732 | 0,4299407    | 5,554262736 | 4,9181864 | 0,03668086  |
| 3932 | ENSG00000136738 | 0,286072738  | 5,1267148   | 5,7244467 | 0,025212683 |
| 3933 | ENSG00000136754 | 0,26185198   | 5,169526696 | 4,1632261 | 0,052854002 |
| 3934 | ENSG00000136758 | -0,04076413  | 7,101400799 | 0,0885568 | 0,768669086 |
| 3935 | ENSG00000136770 | -0,024425126 | 4,439632724 | 0,0317804 | 0,893698247 |
| 3936 | ENSG00000136783 | -0,206830481 | 4,730704783 | 0,6230836 | 0,437926826 |
| 3937 | ENSG00000136802 | -0,123439853 | 4,548888904 | 0,3544907 | 0,557367364 |
| 3938 | ENSG00000136807 | -0,189311808 | 4,99945996  | 0,9757514 | 0,333478787 |
| 3939 | ENSG00000136810 | -0,184884717 | 5,243526144 | 0,8175247 | 0,375233119 |
| 3940 | ENSG00000136811 | 0,30945684   | 4,464936581 | 4,7603989 | 0,039580972 |
| 3941 | ENSG00000136813 | -0,238492212 | 7,550820938 | 4,6128507 | 0,042409026 |
| 3942 | ENSG00000136816 | -0,022671655 | 3,721999062 | 0,0311303 | 0,895219155 |
| 3943 | ENSG00000136819 | 0,11865396   | 5,005708632 | 0,8388772 | 0,369143213 |
| 3944 | ENSG00000136824 | -0,246095693 | 5,066596257 | 1,6980412 | 0,205377397 |
| 3945 | ENSG00000136826 | 0,620015159  | 5,269828238 | 4,1370889 | 0,05358667  |
| 3946 | ENSG00000136827 | 0,061115813  | 4,234531919 | 0,3171546 | 0,677389683 |
| 3947 | ENSG00000136828 | -0,041830972 | 4,296400579 | 0,0340498 | 0,855210356 |
| 3948 | ENSG00000136830 | 0,005837214  | 5,214662501 | 0,0007781 | 0,977985667 |
| 3949 | ENSG00000136842 | -0,022896003 | 6,582470777 | 0,0107458 | 0,918331747 |
| 3950 | ENSG00000136848 | 0,054039751  | 5,198882306 | 0,0651515 | 0,800789224 |
| 3951 | ENSG00000136854 | 0,059007755  | 4,579120195 | 0,0787473 | 0,781498785 |

|      |                 |              |             |           |             |
|------|-----------------|--------------|-------------|-----------|-------------|
| 3952 | ENSG00000136859 | 0,648901629  | 5,69115304  | 6,3349119 | 0,019221256 |
| 3953 | ENSG00000136861 | 0,121046895  | 6,153111692 | 0,883808  | 0,356849344 |
| 3954 | ENSG00000136868 | -0,184044944 | 4,456011432 | 2,4939214 | 0,19461927  |
| 3955 | ENSG00000136869 | -0,120185774 | 6,244338412 | 0,304538  | 0,586348162 |
| 3956 | ENSG00000136870 | -0,409620532 | 5,515636132 | 4,4095414 | 0,046852135 |
| 3957 | ENSG00000136874 | 0,048493864  | 5,613729815 | 0,2515884 | 0,620686723 |
| 3958 | ENSG00000136875 | -0,074519588 | 4,142578866 | 0,5112346 | 0,627617504 |
| 3959 | ENSG00000136877 | -0,382498195 | 4,836549624 | 3,0100676 | 0,096066433 |
| 3960 | ENSG00000136888 | -0,224022468 | 5,989987464 | 1,4335336 | 0,24332449  |
| 3961 | ENSG00000136891 | 0,12027196   | 4,890946045 | 0,5453265 | 0,467666512 |
| 3962 | ENSG00000136895 | 0,220697469  | 4,414064347 | 1,2374907 | 0,277392192 |
| 3963 | ENSG00000136897 | -0,447119566 | 5,464200439 | 3,1034779 | 0,091349296 |
| 3964 | ENSG00000136925 | -0,067336159 | 4,455377354 | 0,1891306 | 0,66767487  |
| 3965 | ENSG00000136930 | -0,413367724 | 6,044771486 | 9,6936322 | 0,004857332 |
| 3966 | ENSG00000136935 | 0,046276611  | 4,851441701 | 0,1445588 | 0,785072302 |
| 3967 | ENSG00000136936 | 0,008906857  | 4,098122039 | 0,0048847 | 0,944879799 |
| 3968 | ENSG00000136937 | 0,02327326   | 5,81074239  | 0,0506362 | 0,82393074  |
| 3969 | ENSG00000136938 | 0,148328157  | 5,075625362 | 0,7888899 | 0,383586358 |
| 3970 | ENSG00000136940 | 0,072802281  | 4,175937924 | 0,2629048 | 0,612986741 |
| 3971 | ENSG00000136942 | 0,153602714  | 7,107790113 | 0,3788424 | 0,544237177 |
| 3972 | ENSG00000136950 | -0,104281674 | 4,481726705 | 0,8428176 | 0,462879094 |
| 3973 | ENSG00000136960 | 0,013434471  | 4,307908717 | 0,0020066 | 0,964655516 |
| 3974 | ENSG00000136986 | 0,088590541  | 5,065553695 | 0,5195097 | 0,47825329  |
| 3975 | ENSG00000136997 | 0,112266013  | 4,67855038  | 0,1214284 | 0,730644552 |
| 3976 | ENSG00000137033 | 0,109777032  | 6,158098064 | 0,1415925 | 0,710135056 |
| 3977 | ENSG00000137038 | -0,094221077 | 5,652663741 | 0,244053  | 0,625956373 |
| 3978 | ENSG00000137040 | -0,561257561 | 5,919522492 | 3,6907612 | 0,067132441 |
| 3979 | ENSG00000137054 | 0,289755224  | 3,970839783 | 5,4472638 | 0,094000541 |
| 3980 | ENSG00000137055 | -0,145507147 | 5,303654134 | 1,3634312 | 0,254807457 |
| 3981 | ENSG00000137070 | 0,047343976  | 4,744657734 | 0,0875694 | 0,769932658 |
| 3982 | ENSG00000137073 | 0,059228726  | 5,108132455 | 0,3232089 | 0,66402876  |
| 3983 | ENSG00000137074 | -0,267588684 | 4,46559994  | 5,6699316 | 0,060163151 |
| 3984 | ENSG00000137075 | 0,309774876  | 5,486893323 | 5,7482725 | 0,024941716 |
| 3985 | ENSG00000137076 | 0,261317804  | 8,307635145 | 1,152747  | 0,294056809 |
| 3986 | ENSG00000137094 | -0,260578105 | 5,359304675 | 1,3734008 | 0,253167416 |
| 3987 | ENSG00000137100 | -0,052165517 | 4,787948852 | 0,1412243 | 0,710483154 |
| 3988 | ENSG00000137103 | 0,467637249  | 4,188683943 | 4,1161298 | 0,054148529 |
| 3989 | ENSG00000137106 | -0,085187678 | 5,560404336 | 0,3096138 | 0,583265023 |
| 3990 | ENSG00000137124 | -0,1530452   | 4,278674853 | 0,5922875 | 0,449330284 |
| 3991 | ENSG00000137145 | -0,009412757 | 6,895673173 | 0,0038171 | 0,951266961 |
| 3992 | ENSG00000137154 | 0,278932949  | 9,248183182 | 1,6366114 | 0,213467711 |
| 3993 | ENSG00000137168 | -0,92234235  | 5,388556916 | 22,873354 | 7,90874E-05 |
| 3994 | ENSG00000137171 | 0,190912925  | 4,362094879 | 1,1174375 | 0,301394964 |
| 3995 | ENSG00000137177 | 0,46696805   | 7,257545305 | 11,896621 | 0,002163201 |
| 3996 | ENSG00000137185 | -0,323750562 | 3,716952306 | 9,2440835 | 0,086300855 |
| 3997 | ENSG00000137193 | -0,833701345 | 5,175230974 | 5,6607555 | 0,025985249 |
| 3998 | ENSG00000137198 | -0,469273124 | 5,200759425 | 4,3603486 | 0,047993852 |
| 3999 | ENSG00000137200 | 0,06372625   | 5,560510794 | 0,1500779 | 0,702005329 |
| 4000 | ENSG00000137207 | 0,092795313  | 5,160155246 | 0,4901881 | 0,490807143 |
| 4001 | ENSG00000137210 | -0,267983535 | 5,628245899 | 1,6517074 | 0,211456511 |
| 4002 | ENSG00000137216 | -0,305131883 | 4,550031149 | 3,5465897 | 0,072312832 |
| 4003 | ENSG00000137267 | -0,461819838 | 4,637955586 | 2,8949939 | 0,102271319 |
| 4004 | ENSG00000137275 | 0,092364829  | 4,745926111 | 0,2311428 | 0,635197445 |
| 4005 | ENSG00000137288 | -0,330516973 | 5,65860007  | 2,627901  | 0,118564651 |
| 4006 | ENSG00000137312 | -0,283153604 | 6,873370271 | 3,5724652 | 0,071317469 |
| 4007 | ENSG00000137337 | 0,148270508  | 4,332595674 | 0,3284541 | 0,572105085 |
| 4008 | ENSG00000137364 | -0,266096058 | 4,580718738 | 2,2357906 | 0,148377363 |
| 4009 | ENSG00000137393 | -0,663715144 | 4,772392849 | 11,955157 | 0,002126699 |
| 4010 | ENSG00000137409 | -0,184703966 | 6,938800032 | 1,4545037 | 0,239990455 |

|      |                 |              |             |           |             |
|------|-----------------|--------------|-------------|-----------|-------------|
| 4011 | ENSG00000137413 | -0,257428453 | 4,740006941 | 1,8994156 | 0,181340407 |
| 4012 | ENSG00000137414 | 0,202652087  | 5,570997413 | 1,3661621 | 0,254386636 |
| 4013 | ENSG00000137449 | 0,056222437  | 5,147256131 | 0,1045217 | 0,749376337 |
| 4014 | ENSG00000137462 | -0,227180382 | 4,400850163 | 0,4092556 | 0,528638336 |
| 4015 | ENSG00000137478 | 0,140099474  | 5,425230559 | 1,2021158 | 0,284153016 |
| 4016 | ENSG00000137486 | 0,223729241  | 4,822254334 | 0,8326676 | 0,37092271  |
| 4017 | ENSG00000137491 | -0,304332185 | 4,99249935  | 1,491614  | 0,234278247 |
| 4018 | ENSG00000137492 | 0,307965001  | 5,56602974  | 3,1094976 | 0,091054622 |
| 4019 | ENSG00000137497 | 0,390908075  | 6,182082039 | 3,6277598 | 0,0693422   |
| 4020 | ENSG00000137500 | -0,002803551 | 5,098556546 | 0,0002897 | 0,986566024 |
| 4021 | ENSG00000137501 | 0,380591962  | 4,703210084 | 2,8731158 | 0,103503083 |
| 4022 | ENSG00000137502 | 0,098367479  | 5,345987217 | 0,5230168 | 0,476788201 |
| 4023 | ENSG00000137504 | -0,136959272 | 5,545091564 | 0,5561427 | 0,463336132 |
| 4024 | ENSG00000137507 | -0,151670072 | 5,102942355 | 0,3491496 | 0,560329408 |
| 4025 | ENSG00000137509 | -0,077559432 | 6,430359904 | 0,3161805 | 0,579306616 |
| 4026 | ENSG00000137513 | -0,03123001  | 4,058666714 | 0,0406342 | 0,883072175 |
| 4027 | ENSG00000137522 | -0,130531832 | 4,005816675 | 1,3179331 | 0,437675759 |
| 4028 | ENSG00000137547 | -0,514909096 | 5,709434723 | 13,516399 | 0,001239762 |
| 4029 | ENSG00000137571 | -0,566576655 | 4,547917057 | 3,0646374 | 0,093277366 |
| 4030 | ENSG00000137573 | 3,14703767   | 7,24266234  | 8,2340692 | 0,008637435 |
| 4031 | ENSG00000137574 | -0,028777734 | 4,558905414 | 0,0926138 | 0,892949995 |
| 4032 | ENSG00000137575 | -0,508247766 | 7,300488637 | 6,252531  | 0,019931858 |
| 4033 | ENSG00000137601 | 0,101996931  | 5,553104955 | 0,500915  | 0,48616454  |
| 4034 | ENSG00000137628 | 0,465806928  | 5,274533521 | 4,9005174 | 0,036989469 |
| 4035 | ENSG00000137642 | 0,182854283  | 5,713960893 | 0,5587742 | 0,462292551 |
| 4036 | ENSG00000137692 | -0,216077525 | 4,585339304 | 2,1077737 | 0,159973348 |
| 4037 | ENSG00000137693 | 0,411269077  | 6,340467084 | 5,3417355 | 0,030081546 |
| 4038 | ENSG00000137710 | -0,08968329  | 6,76650607  | 0,3682185 | 0,549883461 |
| 4039 | ENSG00000137713 | 0,208935333  | 5,29047762  | 0,7881464 | 0,383806887 |
| 4040 | ENSG00000137714 | -0,36280417  | 4,792420789 | 6,7985414 | 0,01569117  |
| 4041 | ENSG00000137752 | 0,326237958  | 3,955760608 | 1,809774  | 0,1915867   |
| 4042 | ENSG00000137760 | 0,047399192  | 4,060081094 | 0,0773926 | 0,783336024 |
| 4043 | ENSG00000137764 | 0,052307861  | 4,011726335 | 0,1360206 | 0,761245048 |
| 4044 | ENSG00000137770 | -0,133003715 | 5,417277596 | 0,6819891 | 0,41734587  |
| 4045 | ENSG00000137776 | 0,050668549  | 6,440455492 | 0,1436203 | 0,708155252 |
| 4046 | ENSG00000137801 | -1,263719383 | 8,132507759 | 7,5344903 | 0,011507258 |
| 4047 | ENSG00000137802 | 0,197960076  | 3,984199944 | 0,6263118 | 0,436758149 |
| 4048 | ENSG00000137806 | -0,553510132 | 4,717053551 | 7,0631521 | 0,014030229 |
| 4049 | ENSG00000137809 | -0,405887537 | 4,895381603 | 3,1081392 | 0,091121022 |
| 4050 | ENSG00000137814 | -0,00627318  | 3,960918712 | 0,0030361 | 0,99697393  |
| 4051 | ENSG00000137815 | 0,106935748  | 5,337853782 | 0,5880651 | 0,450910287 |
| 4052 | ENSG00000137817 | -0,157248487 | 4,941494792 | 1,1036458 | 0,304328173 |
| 4053 | ENSG00000137818 | 0,101996956  | 7,983973393 | 0,2283208 | 0,637259912 |
| 4054 | ENSG00000137821 | -0,422724867 | 4,946354027 | 1,7447045 | 0,199473243 |
| 4055 | ENSG00000137822 | -0,151766846 | 3,612988641 | 0,9706249 | 0,404709889 |
| 4056 | ENSG00000137824 | 0,090312417  | 4,101195454 | 0,5151726 | 0,62842527  |
| 4057 | ENSG00000137831 | 0,23823971   | 7,087634006 | 1,5119655 | 0,231209998 |
| 4058 | ENSG00000137834 | 1,049018917  | 4,455808738 | 11,386518 | 0,002603331 |
| 4059 | ENSG00000137842 | -0,298889442 | 3,735390901 | 8,2119578 | 0,107713251 |
| 4060 | ENSG00000137845 | -0,066108359 | 6,807918712 | 0,2294547 | 0,636413698 |
| 4061 | ENSG00000137871 | -0,075474803 | 5,303885413 | 0,2095945 | 0,65136034  |
| 4062 | ENSG00000137872 | 0,195728021  | 4,852767708 | 1,8251878 | 0,189761569 |
| 4063 | ENSG00000137876 | -0,155022974 | 6,28765903  | 0,3252605 | 0,573966233 |
| 4064 | ENSG00000137878 | -1,049250619 | 5,705904885 | 9,0074298 | 0,006350036 |
| 4065 | ENSG00000137936 | 0,053143593  | 4,087569312 | 0,0340654 | 0,855177627 |
| 4066 | ENSG00000137941 | 0,300367904  | 5,50327321  | 3,2443383 | 0,084733068 |
| 4067 | ENSG00000137942 | -0,002337382 | 5,451308239 | 0,0002257 | 0,988142812 |
| 4068 | ENSG00000137944 | -0,130154341 | 4,200550523 | 0,3728457 | 0,547415264 |
| 4069 | ENSG00000137947 | 0,043091103  | 4,355879324 | 0,0448454 | 0,834144819 |

|      |                 |              |             |           |             |
|------|-----------------|--------------|-------------|-----------|-------------|
| 4070 | ENSG00000137955 | -0,2486207   | 6,133971267 | 1,4224638 | 0,245099061 |
| 4071 | ENSG00000137959 | 0,042853439  | 5,444197036 | 0,0157097 | 0,901339536 |
| 4072 | ENSG00000137962 | -0,250652412 | 6,907286893 | 4,0327241 | 0,056409576 |
| 4073 | ENSG00000137965 | 0,061118217  | 4,421216071 | 0,0703838 | 0,793130612 |
| 4074 | ENSG00000137970 | -0,008816981 | 8,062738086 | 0,0008274 | 0,977298836 |
| 4075 | ENSG00000137992 | -0,132515619 | 5,930487755 | 0,6454946 | 0,429913702 |
| 4076 | ENSG00000137996 | -0,172435019 | 4,89096484  | 2,4784632 | 0,181490314 |
| 4077 | ENSG00000138002 | 0,158860229  | 4,871042649 | 0,9889359 | 0,330300397 |
| 4078 | ENSG00000138018 | -0,2612323   | 5,252338449 | 2,4983702 | 0,127553488 |
| 4079 | ENSG00000138029 | -0,512490512 | 8,863025962 | 4,8223249 | 0,038390641 |
| 4080 | ENSG00000138031 | -0,702421163 | 3,948709853 | 5,6957174 | 0,025575545 |
| 4081 | ENSG00000138032 | -0,318455081 | 5,104545099 | 4,3439911 | 0,04838043  |
| 4082 | ENSG00000138035 | -0,322419478 | 5,039057822 | 6,0783346 | 0,021503148 |
| 4083 | ENSG00000138036 | 0,263421929  | 4,494458083 | 2,9425977 | 0,099649628 |
| 4084 | ENSG00000138050 | -0,229289258 | 4,018706577 | 3,8406751 | 0,183696984 |
| 4085 | ENSG00000138061 | -0,202794825 | 5,789620971 | 0,4655501 | 0,501822959 |
| 4086 | ENSG00000138069 | -0,140178897 | 6,765773917 | 1,5591745 | 0,224243131 |
| 4087 | ENSG00000138071 | 0,020665443  | 6,903411791 | 0,0276712 | 0,869325744 |
| 4088 | ENSG00000138073 | -0,000777076 | 5,053376689 | 3,104E-05 | 0,995602315 |
| 4089 | ENSG00000138078 | -0,030723201 | 7,13749038  | 0,0197874 | 0,889351192 |
| 4090 | ENSG00000138081 | 0,108408683  | 5,294064642 | 0,4683303 | 0,50056133  |
| 4091 | ENSG00000138085 | -0,126967464 | 6,169845968 | 0,7604328 | 0,392143565 |
| 4092 | ENSG00000138095 | -0,092385768 | 7,553613692 | 0,354628  | 0,557275919 |
| 4093 | ENSG00000138100 | -0,251134379 | 6,253902538 | 1,060408  | 0,313778446 |
| 4094 | ENSG00000138107 | -0,233769249 | 6,381350012 | 2,7983282 | 0,107799312 |
| 4095 | ENSG00000138119 | 0,362268085  | 5,987031869 | 2,0742796 | 0,163209954 |
| 4096 | ENSG00000138134 | -0,358580268 | 4,490973017 | 2,6118025 | 0,119640248 |
| 4097 | ENSG00000138138 | -0,531134495 | 7,233785488 | 3,3237628 | 0,081246771 |
| 4098 | ENSG00000138162 | 0,25508045   | 7,624680981 | 0,5341869 | 0,472196731 |
| 4099 | ENSG00000138166 | 0,408082862  | 3,896409613 | 1,4899658 | 0,234528986 |
| 4100 | ENSG00000138175 | -0,642240016 | 4,840466902 | 14,699951 | 0,000842965 |
| 4101 | ENSG00000138182 | 0,079177432  | 3,677376515 | 0,1488424 | 0,703172281 |
| 4102 | ENSG00000138185 | -0,232100315 | 5,019981241 | 2,2828075 | 0,144367086 |
| 4103 | ENSG00000138190 | -0,200887638 | 4,846682325 | 1,0897529 | 0,307322045 |
| 4104 | ENSG00000138193 | 0,594077783  | 7,106959845 | 6,5997476 | 0,017120647 |
| 4105 | ENSG00000138246 | -0,072355686 | 6,754578427 | 0,5289945 | 0,474308057 |
| 4106 | ENSG00000138279 | -0,040598461 | 6,664106018 | 0,1231487 | 0,72881169  |
| 4107 | ENSG00000138286 | 0,054048531  | 4,467039089 | 0,3078274 | 0,687587658 |
| 4108 | ENSG00000138303 | -0,350141871 | 4,891042812 | 6,5258522 | 0,017658038 |
| 4109 | ENSG00000138326 | -0,083012143 | 9,001426797 | 0,1130018 | 0,739784957 |
| 4110 | ENSG00000138336 | -0,085711848 | 4,315724058 | 0,2350706 | 0,6323527   |
| 4111 | ENSG00000138347 | 0,480075571  | 7,507371527 | 2,1554912 | 0,155539472 |
| 4112 | ENSG00000138356 | -0,437921123 | 5,940488837 | 0,6154656 | 0,440704431 |
| 4113 | ENSG00000138363 | -0,275792551 | 4,393496374 | 1,8423544 | 0,187782396 |
| 4114 | ENSG00000138375 | -0,122829366 | 3,783626341 | 0,8624195 | 0,489209648 |
| 4115 | ENSG00000138376 | 0,14132794   | 4,550618099 | 0,3987463 | 0,533933452 |
| 4116 | ENSG00000138378 | 0,612405784  | 6,397922924 | 1,9549786 | 0,175325437 |
| 4117 | ENSG00000138380 | -0,015752109 | 4,436130121 | 0,0137097 | 0,969013785 |
| 4118 | ENSG00000138381 | -0,422685695 | 4,609215691 | 4,1970443 | 0,052015533 |
| 4119 | ENSG00000138382 | -0,373892377 | 4,592329354 | 3,2786728 | 0,083205257 |
| 4120 | ENSG00000138385 | -0,090817574 | 5,659246077 | 0,3722402 | 0,547736235 |
| 4121 | ENSG00000138386 | 0,256110229  | 6,377565851 | 1,7641419 | 0,197076052 |
| 4122 | ENSG00000138398 | -0,101600548 | 6,466589499 | 0,256222  | 0,617521968 |
| 4123 | ENSG00000138399 | -0,531836065 | 5,610991589 | 3,3294071 | 0,081005369 |
| 4124 | ENSG00000138411 | -0,075818473 | 5,713739423 | 0,181778  | 0,673794373 |
| 4125 | ENSG00000138413 | 0,098837402  | 5,776508297 | 0,0765035 | 0,784551346 |
| 4126 | ENSG00000138430 | -0,309928147 | 5,638711463 | 3,4745046 | 0,075073572 |
| 4127 | ENSG00000138433 | 0,015916507  | 4,853112122 | 0,012278  | 0,912725206 |
| 4128 | ENSG00000138434 | 0,066391786  | 6,781810114 | 0,2524957 | 0,620060919 |

|      |                 |              |             |           |             |
|------|-----------------|--------------|-------------|-----------|-------------|
| 4129 | ENSG00000138442 | -0,499552544 | 4,871997245 | 14,706095 | 0,000837229 |
| 4130 | ENSG00000138443 | 0,069703164  | 6,598075411 | 0,2230534 | 0,641145733 |
| 4131 | ENSG00000138448 | -0,259619558 | 8,339911794 | 1,2019878 | 0,28421704  |
| 4132 | ENSG00000138449 | 0,401158583  | 7,023789221 | 1,9898347 | 0,171676031 |
| 4133 | ENSG00000138459 | 0,020985027  | 4,783152159 | 0,0148796 | 0,903967555 |
| 4134 | ENSG00000138463 | 0,042822101  | 4,424121397 | 0,0992531 | 0,80881247  |
| 4135 | ENSG00000138468 | -0,142361296 | 5,575761902 | 0,7215051 | 0,40436338  |
| 4136 | ENSG00000138495 | -0,870722061 | 5,711226668 | 17,330014 | 0,000371966 |
| 4137 | ENSG00000138496 | 0,174897536  | 5,306072299 | 0,9192398 | 0,347597429 |
| 4138 | ENSG00000138592 | -0,16959105  | 5,96405752  | 1,8166354 | 0,190732547 |
| 4139 | ENSG00000138593 | 0,11006653   | 6,508305518 | 1,2167729 | 0,281308937 |
| 4140 | ENSG00000138594 | 0,319281552  | 5,669028419 | 2,1861211 | 0,15275961  |
| 4141 | ENSG00000138600 | -0,126264209 | 6,459612471 | 0,8160903 | 0,37561633  |
| 4142 | ENSG00000138604 | -0,092274354 | 4,528425651 | 0,3203663 | 0,576842295 |
| 4143 | ENSG00000138613 | 0,142520365  | 4,229915443 | 1,6121582 | 0,353073629 |
| 4144 | ENSG00000138614 | 0,055302485  | 4,47067808  | 0,4141057 | 0,679653742 |
| 4145 | ENSG00000138615 | -1,111178881 | 5,893376182 | 9,8765403 | 0,004543284 |
| 4146 | ENSG00000138629 | -0,145143311 | 4,464949303 | 0,8421769 | 0,368252551 |
| 4147 | ENSG00000138639 | -0,064672044 | 5,582606483 | 0,1993881 | 0,659368043 |
| 4148 | ENSG00000138640 | 0,220054352  | 5,7533601   | 1,1026764 | 0,304535783 |
| 4149 | ENSG00000138642 | -0,09446354  | 4,364777166 | 0,3318145 | 0,570159717 |
| 4150 | ENSG00000138658 | -0,357459178 | 3,523750726 | 4,494345  | 0,075431587 |
| 4151 | ENSG00000138660 | -0,180905392 | 4,169425364 | 1,0784095 | 0,309796188 |
| 4152 | ENSG00000138663 | -0,457623877 | 5,978578352 | 3,0189342 | 0,095606756 |
| 4153 | ENSG00000138668 | 0,006506935  | 6,334387471 | 0,0034957 | 0,953359183 |
| 4154 | ENSG00000138669 | -0,377800518 | 4,247197087 | 0,7635367 | 0,391212846 |
| 4155 | ENSG00000138670 | 0,352986814  | 4,425470463 | 2,5354108 | 0,124903451 |
| 4156 | ENSG00000138674 | 0,415714262  | 7,391192335 | 19,387911 | 0,000202681 |
| 4157 | ENSG00000138678 | -0,074492417 | 5,703816522 | 0,1520345 | 0,700168698 |
| 4158 | ENSG00000138685 | 0,437186765  | 4,883758762 | 1,9621467 | 0,174567289 |
| 4159 | ENSG00000138686 | 0,220286458  | 3,797583774 | 2,8343876 | 0,214825745 |
| 4160 | ENSG00000138688 | -0,012999743 | 8,10600297  | 0,0107019 | 0,918495071 |
| 4161 | ENSG00000138698 | 0,085088103  | 4,512193169 | 0,3580945 | 0,555370576 |
| 4162 | ENSG00000138709 | 0,049525852  | 4,889553582 | 0,1017024 | 0,752660396 |
| 4163 | ENSG00000138735 | 0,305338048  | 6,12863812  | 1,0498406 | 0,316148725 |
| 4164 | ENSG00000138738 | 0,510136094  | 4,764666483 | 5,8836107 | 0,023493378 |
| 4165 | ENSG00000138744 | 0,272231388  | 3,760534894 | 3,9918171 | 0,147461389 |
| 4166 | ENSG00000138750 | 0,006708849  | 4,862363325 | 0,0020596 | 0,964191764 |
| 4167 | ENSG00000138756 | -0,117281094 | 5,37251884  | 0,5540646 | 0,464162963 |
| 4168 | ENSG00000138757 | -0,036967626 | 6,615908437 | 0,1117284 | 0,741188465 |
| 4169 | ENSG00000138758 | 0,493401001  | 6,953504293 | 3,9215241 | 0,05969693  |
| 4170 | ENSG00000138759 | 2,21990901   | 5,433674962 | 11,219519 | 0,002764691 |
| 4171 | ENSG00000138760 | 0,024466194  | 7,47610832  | 0,0474775 | 0,829417822 |
| 4172 | ENSG00000138764 | 0,461350076  | 4,677225765 | 2,6496054 | 0,117132441 |
| 4173 | ENSG00000138767 | 0,055680094  | 5,872141919 | 0,1530853 | 0,699179305 |
| 4174 | ENSG00000138768 | -0,077140507 | 7,462138754 | 0,2539814 | 0,619043051 |
| 4175 | ENSG00000138771 | 0,377282552  | 4,05553107  | 2,6164163 | 0,119330818 |
| 4176 | ENSG00000138772 | -0,511438693 | 5,165116722 | 4,8413317 | 0,038044646 |
| 4177 | ENSG00000138777 | -0,420088673 | 6,161336578 | 3,5170369 | 0,073430348 |
| 4178 | ENSG00000138785 | -0,30744752  | 3,788265939 | 5,1297215 | 0,102493987 |
| 4179 | ENSG00000138792 | -0,814589782 | 4,510912979 | 13,037885 | 0,001462155 |
| 4180 | ENSG00000138796 | -0,175138134 | 6,773993184 | 1,2868541 | 0,268257203 |
| 4181 | ENSG00000138798 | -0,967709673 | 4,539816407 | 8,0669332 | 0,009243078 |
| 4182 | ENSG00000138801 | 0,423097701  | 4,533774146 | 3,5778395 | 0,071152257 |
| 4183 | ENSG00000138802 | -0,06223137  | 5,823823784 | 0,2923834 | 0,59385266  |
| 4184 | ENSG00000138814 | 0,097281731  | 5,328311803 | 0,242078  | 0,62735002  |
| 4185 | ENSG00000138821 | 1,575722222  | 6,695116037 | 8,3050755 | 0,008393487 |
| 4186 | ENSG00000138829 | -1,473761381 | 4,658411329 | 13,087141 | 0,00143789  |
| 4187 | ENSG00000138834 | 0,250175565  | 5,290678492 | 1,4194603 | 0,245583393 |



|      |                 |              |             |           |             |
|------|-----------------|--------------|-------------|-----------|-------------|
| 4188 | ENSG00000138835 | -0,05602516  | 6,34139033  | 0,0889787 | 0,768144718 |
| 4189 | ENSG00000138867 | -0,201818769 | 6,007314612 | 1,6347768 | 0,213733773 |
| 4190 | ENSG00000138942 | 0,030376124  | 4,67926164  | 0,0596175 | 0,872038161 |
| 4191 | ENSG00000139044 | 0,648724596  | 5,010226549 | 5,6375033 | 0,026261784 |
| 4192 | ENSG00000139083 | -0,302636994 | 4,431211005 | 2,8768211 | 0,10329326  |
| 4193 | ENSG00000139112 | -0,110609158 | 7,870945746 | 0,5405939 | 0,469556684 |
| 4194 | ENSG00000139116 | -0,399039717 | 6,826688511 | 2,9753384 | 0,097891807 |
| 4195 | ENSG00000139117 | -0,068984726 | 5,235579022 | 0,1230297 | 0,728948297 |
| 4196 | ENSG00000139132 | -0,182601818 | 5,998497008 | 1,4836259 | 0,235496683 |
| 4197 | ENSG00000139146 | -0,07303196  | 3,882933233 | 0,2810126 | 0,691381857 |
| 4198 | ENSG00000139154 | 0,08765466   | 5,169473576 | 0,3362173 | 0,567630805 |
| 4199 | ENSG00000139163 | 0,003353649  | 5,990758175 | 0,0002483 | 0,987563774 |
| 4200 | ENSG00000139168 | -0,282029111 | 5,182605886 | 2,1542727 | 0,155651309 |
| 4201 | ENSG00000139173 | -0,141471218 | 3,882176351 | 0,6049582 | 0,444581743 |
| 4202 | ENSG00000139174 | 0,684553299  | 3,79929132  | 17,433594 | 0,00036061  |
| 4203 | ENSG00000139178 | 0,041110245  | 4,474013093 | 0,0192763 | 0,890779867 |
| 4204 | ENSG00000139180 | -0,409095487 | 5,043070539 | 3,860721  | 0,061560839 |
| 4205 | ENSG00000139197 | -0,093790324 | 4,577740893 | 0,3160995 | 0,579373648 |
| 4206 | ENSG00000139218 | 0,042376627  | 7,503201038 | 0,1430607 | 0,708696765 |
| 4207 | ENSG00000139233 | 0,02028536   | 4,155229089 | 0,0187434 | 0,892289872 |
| 4208 | ENSG00000139239 | 0,107145076  | 5,241305015 | 0,2390713 | 0,629485354 |
| 4209 | ENSG00000139263 | 0,623256397  | 4,337557441 | 6,1978668 | 0,020419474 |
| 4210 | ENSG00000139278 | -0,022533784 | 4,550904306 | 0,0085653 | 0,927059611 |
| 4211 | ENSG00000139289 | 0,867107259  | 6,1616802   | 8,8557001 | 0,006740079 |
| 4212 | ENSG00000139291 | -0,254546476 | 5,027319385 | 3,1171242 | 0,090668959 |
| 4213 | ENSG00000139304 | 1,013073919  | 4,893146921 | 3,2502574 | 0,08446739  |
| 4214 | ENSG00000139318 | 0,970895914  | 5,352380522 | 14,322533 | 0,000952927 |
| 4215 | ENSG00000139323 | 0,076284744  | 4,096092916 | 0,3542193 | 0,578507933 |
| 4216 | ENSG00000139324 | -0,04350945  | 5,350942288 | 0,0449454 | 0,833962976 |
| 4217 | ENSG00000139329 | 0,972277212  | 8,484772749 | 10,495648 | 0,003602727 |
| 4218 | ENSG00000139350 | -0,148239491 | 4,7185788   | 0,5448687 | 0,467851242 |
| 4219 | ENSG00000139370 | -0,008623289 | 4,429291714 | 0,0096598 | 0,95918775  |
| 4220 | ENSG00000139372 | -0,186351384 | 4,535502564 | 2,6473353 | 0,1998418   |
| 4221 | ENSG00000139428 | -0,198683462 | 4,276933768 | 1,7902941 | 0,210621378 |
| 4222 | ENSG00000139433 | -0,055726351 | 4,512432775 | 0,2694895 | 0,694587435 |
| 4223 | ENSG00000139436 | -0,037861788 | 4,683614268 | 0,0621161 | 0,805383575 |
| 4224 | ENSG00000139437 | -0,065466034 | 3,633870258 | 0,1519029 | 0,704934824 |
| 4225 | ENSG00000139496 | -0,149934373 | 5,862484954 | 0,7503193 | 0,395278326 |
| 4226 | ENSG00000139505 | -0,220647597 | 5,673247065 | 1,3254846 | 0,26138129  |
| 4227 | ENSG00000139508 | -0,062669339 | 4,78945252  | 0,2408467 | 0,679084547 |
| 4228 | ENSG00000139514 | -0,26475529  | 4,516825427 | 1,227492  | 0,279292166 |
| 4229 | ENSG00000139517 | 0,318574519  | 4,506118283 | 6,3535215 | 0,019036818 |
| 4230 | ENSG00000139531 | -0,101832923 | 4,571993623 | 0,3913899 | 0,537698796 |
| 4231 | ENSG00000139567 | -0,156140935 | 4,518365274 | 0,6227507 | 0,438047637 |
| 4232 | ENSG00000139613 | 0,319341054  | 5,791344563 | 2,5667966 | 0,122708694 |
| 4233 | ENSG00000139620 | -0,255004717 | 4,680647079 | 7,842296  | 0,049519706 |
| 4234 | ENSG00000139624 | 0,059408683  | 4,602597982 | 0,1384305 | 0,713235893 |
| 4235 | ENSG00000139631 | 0,156685998  | 3,819523213 | 0,523539  | 0,476595742 |
| 4236 | ENSG00000139636 | -0,011559805 | 4,344080841 | 0,0039824 | 0,950224531 |
| 4237 | ENSG00000139641 | 0,436849446  | 5,973701623 | 2,8608026 | 0,104203924 |
| 4238 | ENSG00000139644 | 0,106151128  | 8,069479494 | 0,5648689 | 0,459864067 |
| 4239 | ENSG00000139645 | 0,198294425  | 4,719268923 | 0,6066386 | 0,44395803  |
| 4240 | ENSG00000139651 | 0,282921365  | 4,507872038 | 3,2025226 | 0,086637643 |
| 4241 | ENSG00000139668 | -0,188103112 | 4,375215469 | 1,2727254 | 0,27083095  |
| 4242 | ENSG00000139675 | 0,230439972  | 5,621830977 | 3,0780602 | 0,092559497 |
| 4243 | ENSG00000139679 | -0,275532393 | 5,358865756 | 0,9907869 | 0,329857555 |
| 4244 | ENSG00000139684 | -0,276976386 | 6,649438266 | 2,6200138 | 0,119090197 |
| 4245 | ENSG00000139687 | -0,089553269 | 5,904396951 | 0,4315739 | 0,517685882 |
| 4246 | ENSG00000139697 | 0,042549007  | 6,312316961 | 0,1535585 | 0,698735028 |

|      |                 |              |             |           |             |
|------|-----------------|--------------|-------------|-----------|-------------|
| 4247 | ENSG00000139726 | 0,008892109  | 5,080199347 | 0,0065175 | 0,936348606 |
| 4248 | ENSG00000139746 | -0,067250021 | 6,154707568 | 0,3429073 | 0,563810754 |
| 4249 | ENSG00000139793 | -0,17953107  | 6,936452324 | 1,2219766 | 0,280347558 |
| 4250 | ENSG00000139826 | -0,052026155 | 4,66113003  | 0,0813995 | 0,77795083  |
| 4251 | ENSG00000139842 | 0,072686268  | 6,849437776 | 0,2529994 | 0,619718373 |
| 4252 | ENSG00000139914 | -0,536413544 | 4,921062242 | 3,2442    | 0,084739288 |
| 4253 | ENSG00000139921 | 0,0116689    | 4,819028272 | 0,0033578 | 0,954289105 |
| 4254 | ENSG00000139926 | 0,307210631  | 4,931706645 | 1,1139046 | 0,302142695 |
| 4255 | ENSG00000139946 | 0,104004124  | 4,018385196 | 0,2214099 | 0,642377957 |
| 4256 | ENSG00000139971 | 0,104522545  | 4,891656101 | 0,2290854 | 0,636699507 |
| 4257 | ENSG00000139974 | -0,005178735 | 3,728801028 | 0,0009286 | 0,981838126 |
| 4258 | ENSG00000139977 | -0,118335597 | 5,450782279 | 0,6464511 | 0,429574278 |
| 4259 | ENSG00000139990 | -0,000819128 | 5,923669273 | 3,831E-05 | 0,99511417  |
| 4260 | ENSG00000139998 | -0,642143253 | 4,931044114 | 4,8198967 | 0,038435097 |
| 4261 | ENSG00000140022 | -0,087301071 | 4,206310383 | 0,2019686 | 0,657322585 |
| 4262 | ENSG00000140044 | 0,070960071  | 4,024367928 | 0,1398073 | 0,711880791 |
| 4263 | ENSG00000140092 | 0,224343155  | 6,603053613 | 0,6665526 | 0,422591407 |
| 4264 | ENSG00000140105 | -0,460831998 | 6,569724242 | 6,679519  | 0,016538821 |
| 4265 | ENSG00000140153 | -0,034867829 | 4,457750928 | 0,1897739 | 0,805268784 |
| 4266 | ENSG00000140157 | -0,229640228 | 4,423486473 | 2,9399425 | 0,122938024 |
| 4267 | ENSG00000140199 | -0,04249602  | 5,295859687 | 0,091285  | 0,76524635  |
| 4268 | ENSG00000140259 | 0,019341879  | 4,5951798   | 0,0184971 | 0,892992663 |
| 4269 | ENSG00000140262 | 0,181780716  | 6,091377532 | 2,2139822 | 0,150235864 |
| 4270 | ENSG00000140264 | 0,02213813   | 6,957948049 | 0,0109053 | 0,917730269 |
| 4271 | ENSG00000140265 | 0,096046429  | 4,080155166 | 0,5425339 | 0,584775275 |
| 4272 | ENSG00000140285 | -0,830290405 | 6,038779894 | 5,9909806 | 0,022388741 |
| 4273 | ENSG00000140299 | 0,003491602  | 6,906073597 | 0,0005371 | 0,981709603 |
| 4274 | ENSG00000140307 | -0,214830649 | 4,7235737   | 2,0173803 | 0,168855131 |
| 4275 | ENSG00000140319 | -0,217518066 | 6,962818932 | 2,7400252 | 0,111333096 |
| 4276 | ENSG00000140332 | -0,169736041 | 3,941140786 | 0,5047959 | 0,484508451 |
| 4277 | ENSG00000140350 | -0,017829586 | 6,15322999  | 0,0147905 | 0,904252186 |
| 4278 | ENSG00000140367 | 0,383553902  | 5,624879969 | 5,711477  | 0,025393224 |
| 4279 | ENSG00000140374 | -0,174297748 | 7,259008618 | 0,7946143 | 0,381894789 |
| 4280 | ENSG00000140382 | 0,076754346  | 5,00527864  | 0,4230448 | 0,583286594 |
| 4281 | ENSG00000140386 | -0,323199848 | 5,903543177 | 4,2448429 | 0,050800266 |
| 4282 | ENSG00000140391 | 0,215241143  | 6,736005152 | 1,6809582 | 0,207593053 |
| 4283 | ENSG00000140395 | -0,010355772 | 4,888729907 | 0,0111316 | 0,945140285 |
| 4284 | ENSG00000140396 | 0,049371928  | 6,332586722 | 0,1967282 | 0,661484807 |
| 4285 | ENSG00000140400 | 0,164488841  | 5,309411537 | 0,5966829 | 0,447673874 |
| 4286 | ENSG00000140403 | 0,132805535  | 6,971101359 | 0,2694756 | 0,60861918  |
| 4287 | ENSG00000140406 | -0,348703821 | 3,808869933 | 3,6154261 | 0,069784461 |
| 4288 | ENSG00000140416 | -0,297812795 | 11,77694269 | 1,1485778 | 0,294872452 |
| 4289 | ENSG00000140443 | 0,133685735  | 6,201159059 | 0,2603665 | 0,614707173 |
| 4290 | ENSG00000140450 | 0,530636278  | 5,414998504 | 4,3869918 | 0,04737164  |
| 4291 | ENSG00000140455 | 0,084317716  | 4,578839706 | 0,4714257 | 0,499139495 |
| 4292 | ENSG00000140463 | 0,333040507  | 4,16405648  | 3,9883859 | 0,057720932 |
| 4293 | ENSG00000140464 | 0,174917889  | 4,242814182 | 0,7877384 | 0,383927956 |
| 4294 | ENSG00000140471 | 0,134872424  | 3,981662052 | 0,6508106 | 0,428046705 |
| 4295 | ENSG00000140474 | -0,205497706 | 4,498816777 | 1,8574667 | 0,186024113 |
| 4296 | ENSG00000140479 | -0,399131768 | 3,959397374 | 2,9361822 | 0,099998351 |
| 4297 | ENSG00000140497 | 0,074552146  | 4,853024024 | 0,2111916 | 0,650128366 |
| 4298 | ENSG00000140521 | -0,101077742 | 4,492726891 | 0,2510712 | 0,621060557 |
| 4299 | ENSG00000140526 | 0,0082875    | 7,366933648 | 0,0020339 | 0,964416168 |
| 4300 | ENSG00000140545 | -0,015494073 | 7,526083255 | 0,0055895 | 0,94104652  |
| 4301 | ENSG00000140553 | 0,219050058  | 4,465194789 | 1,2906328 | 0,267574281 |
| 4302 | ENSG00000140564 | -0,084694903 | 5,371707649 | 0,2095436 | 0,651399651 |
| 4303 | ENSG00000140575 | 0,116855395  | 7,509225358 | 0,327522  | 0,572647061 |
| 4304 | ENSG00000140577 | -0,03820986  | 5,024954808 | 0,0340256 | 0,855261224 |
| 4305 | ENSG00000140598 | -0,060491023 | 4,598523601 | 0,2870866 | 0,692242499 |

|      |                 |              |             |           |             |
|------|-----------------|--------------|-------------|-----------|-------------|
| 4306 | ENSG00000140612 | 0,075045584  | 6,057657901 | 0,1767363 | 0,678075975 |
| 4307 | ENSG00000140632 | 0,082721423  | 5,68667572  | 0,2372855 | 0,630761522 |
| 4308 | ENSG00000140650 | -0,137231182 | 3,557547476 | 0,4711727 | 0,499277176 |
| 4309 | ENSG00000140694 | 0,098760637  | 5,127759586 | 1,0495196 | 0,329926502 |
| 4310 | ENSG00000140718 | 0,133508758  | 6,01494441  | 2,0095108 | 0,169610576 |
| 4311 | ENSG00000140740 | -0,429307538 | 8,7017134   | 3,1954261 | 0,086965743 |
| 4312 | ENSG00000140743 | 0,507845789  | 4,019214105 | 10,894843 | 0,0031107   |
| 4313 | ENSG00000140750 | 0,060459164  | 5,230213942 | 0,0767958 | 0,784150889 |
| 4314 | ENSG00000140795 | -0,219673073 | 8,799592726 | 0,5419773 | 0,469020949 |
| 4315 | ENSG00000140829 | 0,226360777  | 5,023059315 | 1,3910028 | 0,250233995 |
| 4316 | ENSG00000140836 | -0,414383398 | 5,455075694 | 2,2836112 | 0,144299671 |
| 4317 | ENSG00000140848 | 0,306062622  | 3,81973483  | 2,6804543 | 0,115131598 |
| 4318 | ENSG00000140853 | 0,05296273   | 4,191976573 | 0,0396926 | 0,843825202 |
| 4319 | ENSG00000140859 | 0,284822012  | 4,809251489 | 2,2344193 | 0,148496315 |
| 4320 | ENSG00000140905 | -0,140456418 | 3,94678249  | 0,5632258 | 0,460535956 |
| 4321 | ENSG00000140937 | 2,339738732  | 5,225297224 | 10,695715 | 0,003346237 |
| 4322 | ENSG00000140939 | -0,092875335 | 4,634671005 | 0,3470205 | 0,561518711 |
| 4323 | ENSG00000140941 | 0,054507856  | 6,53484093  | 0,2504559 | 0,621469881 |
| 4324 | ENSG00000140943 | -0,171147554 | 6,675315155 | 1,2071899 | 0,283203232 |
| 4325 | ENSG00000140945 | 0,223652091  | 5,35379411  | 1,4036897 | 0,248146802 |
| 4326 | ENSG00000140948 | 0,31490764   | 4,87609106  | 3,3806696 | 0,078850235 |
| 4327 | ENSG00000140986 | -0,634531364 | 5,737970059 | 4,4627111 | 0,045652448 |
| 4328 | ENSG00000140988 | 0,08391482   | 8,234260845 | 0,2363768 | 0,631397385 |
| 4329 | ENSG00000140990 | -0,584027584 | 6,731358213 | 9,812568  | 0,004654901 |
| 4330 | ENSG00000140992 | 0,056596228  | 5,364068805 | 0,1016899 | 0,752674996 |
| 4331 | ENSG00000140995 | 0,041839435  | 4,741870979 | 0,0870718 | 0,830948371 |
| 4332 | ENSG00000141002 | 0,238180001  | 5,379818939 | 1,8118102 | 0,191346184 |
| 4333 | ENSG00000141026 | -0,333459565 | 4,510951892 | 4,6718152 | 0,041255375 |
| 4334 | ENSG00000141027 | 0,034380948  | 6,92110115  | 0,0720183 | 0,790792957 |
| 4335 | ENSG00000141030 | -0,424373828 | 5,571163299 | 7,4803645 | 0,011769755 |
| 4336 | ENSG00000141034 | -0,026682809 | 4,217285503 | 0,0448404 | 0,834147518 |
| 4337 | ENSG00000141040 | 0,107161137  | 3,750481664 | 0,4879344 | 0,544687935 |
| 4338 | ENSG00000141052 | 0,095660376  | 6,442213994 | 0,1644043 | 0,688862407 |
| 4339 | ENSG00000141076 | -0,094666531 | 4,480188506 | 0,4081929 | 0,529156481 |
| 4340 | ENSG00000141084 | 0,443815458  | 4,084434948 | 4,9166664 | 0,036707294 |
| 4341 | ENSG00000141127 | -0,062785041 | 4,304348445 | 0,3253847 | 0,693269291 |
| 4342 | ENSG00000141161 | 0,055798     | 7,608109291 | 0,042692  | 0,838115642 |
| 4343 | ENSG00000141179 | -0,102969686 | 3,9967332   | 0,9804588 | 0,537731874 |
| 4344 | ENSG00000141198 | 0,081089179  | 3,609720015 | 0,3530146 | 0,653016003 |
| 4345 | ENSG00000141219 | -0,075602108 | 4,684095738 | 0,3617089 | 0,621615642 |
| 4346 | ENSG00000141232 | 0,396028923  | 5,128660503 | 5,2397389 | 0,031539726 |
| 4347 | ENSG00000141252 | 0,062289507  | 5,280850335 | 0,0701695 | 0,793438274 |
| 4348 | ENSG00000141258 | 0,222338965  | 4,833210559 | 1,4044763 | 0,248018127 |
| 4349 | ENSG00000141279 | -0,03727617  | 6,782699835 | 0,0748535 | 0,786818451 |
| 4350 | ENSG00000141295 | 0,315592461  | 4,133170466 | 1,6042095 | 0,217923594 |
| 4351 | ENSG00000141298 | -0,230608902 | 6,286739508 | 3,1890735 | 0,087214746 |
| 4352 | ENSG00000141338 | -0,288399521 | 8,015338228 | 2,4385011 | 0,131978644 |
| 4353 | ENSG00000141367 | -0,032927295 | 8,463085269 | 0,0822074 | 0,776873634 |
| 4354 | ENSG00000141376 | 0,178451354  | 4,719158439 | 3,0165835 | 0,197563158 |
| 4355 | ENSG00000141378 | -0,488824896 | 3,797685136 | 12,306567 | 0,007476288 |
| 4356 | ENSG00000141380 | 0,000372934  | 6,029590738 | 1,062E-05 | 0,997428077 |
| 4357 | ENSG00000141385 | 0,011170659  | 6,416610451 | 0,0049305 | 0,944624641 |
| 4358 | ENSG00000141424 | -0,01170382  | 5,04474381  | 0,0084091 | 0,927722989 |
| 4359 | ENSG00000141425 | -0,321080624 | 6,102119183 | 3,044281  | 0,094306667 |
| 4360 | ENSG00000141429 | -0,045920331 | 6,268046048 | 0,0600902 | 0,808516905 |
| 4361 | ENSG00000141431 | -0,126654776 | 3,860517992 | 0,4636569 | 0,502685299 |
| 4362 | ENSG00000141441 | -0,201423469 | 4,76327368  | 1,0127781 | 0,324658505 |
| 4363 | ENSG00000141446 | -0,207459438 | 5,173834846 | 1,1137815 | 0,302168787 |
| 4364 | ENSG00000141447 | -0,345507096 | 6,1770962   | 7,732495  | 0,010579982 |

|      |                 |              |             |           |             |
|------|-----------------|--------------|-------------|-----------|-------------|
| 4365 | ENSG00000141448 | 0,262941596  | 5,616910082 | 4,3227366 | 0,048847709 |
| 4366 | ENSG00000141449 | -0,398430683 | 5,330331791 | 2,3626378 | 0,137850085 |
| 4367 | ENSG00000141452 | -0,039573665 | 3,862701698 | 0,1305185 | 0,814755232 |
| 4368 | ENSG00000141458 | -0,067739438 | 4,601496978 | 0,2161502 | 0,646333227 |
| 4369 | ENSG00000141469 | 0,039662191  | 4,2330909   | 0,0178893 | 0,894757296 |
| 4370 | ENSG00000141480 | -0,275225935 | 4,546572486 | 1,0990369 | 0,305316991 |
| 4371 | ENSG00000141503 | 0,155893784  | 4,677675714 | 0,547638  | 0,466735477 |
| 4372 | ENSG00000141504 | -0,245709645 | 5,040669482 | 2,7728321 | 0,109356167 |
| 4373 | ENSG00000141540 | -0,301555848 | 4,175947078 | 1,5818666 | 0,221051479 |
| 4374 | ENSG00000141543 | 0,014463568  | 4,860779197 | 0,013306  | 0,98864167  |
| 4375 | ENSG00000141551 | -0,072118001 | 5,304884098 | 0,1338027 | 0,71784803  |
| 4376 | ENSG00000141552 | -0,220186227 | 4,942614454 | 1,1092133 | 0,303139458 |
| 4377 | ENSG00000141556 | -0,083591363 | 5,208808885 | 0,2472954 | 0,623683732 |
| 4378 | ENSG00000141562 | -0,241094371 | 5,188449777 | 2,8744037 | 0,103395431 |
| 4379 | ENSG00000141564 | 0,202590608  | 4,107978613 | 0,9644939 | 0,336226428 |
| 4380 | ENSG00000141568 | -0,234971231 | 4,497167787 | 1,4592135 | 0,239270747 |
| 4381 | ENSG00000141580 | 0,056562779  | 5,308071702 | 0,2647006 | 0,705432709 |
| 4382 | ENSG00000141627 | 0,028856549  | 5,549605125 | 0,1015471 | 0,752832783 |
| 4383 | ENSG00000141639 | 0,255326764  | 5,289235935 | 0,6143636 | 0,441108543 |
| 4384 | ENSG00000141644 | 0,178430214  | 5,086612608 | 1,6636077 | 0,209839447 |
| 4385 | ENSG00000141646 | 0,12131088   | 6,395936654 | 1,0306412 | 0,320481929 |
| 4386 | ENSG00000141664 | -0,168141615 | 4,698739949 | 0,9892014 | 0,330236817 |
| 4387 | ENSG00000141699 | 0,353056616  | 4,980437023 | 4,0598127 | 0,055691608 |
| 4388 | ENSG00000141736 | -0,142986676 | 6,200486309 | 0,3338677 | 0,568977605 |
| 4389 | ENSG00000141753 | -0,486283452 | 7,886305199 | 1,8401777 | 0,18803366  |
| 4390 | ENSG00000141756 | 0,54800326   | 4,667989337 | 4,8571055 | 0,037760162 |
| 4391 | ENSG00000141759 | -0,230665132 | 4,889201953 | 3,2217414 | 0,085710416 |
| 4392 | ENSG00000141867 | -0,087758978 | 4,931191296 | 0,1063849 | 0,747232905 |
| 4393 | ENSG00000141905 | -0,030058491 | 6,005506349 | 0,0121726 | 0,913100375 |
| 4394 | ENSG00000141959 | 0,264162773  | 5,138004544 | 1,6350061 | 0,213702721 |
| 4395 | ENSG00000142002 | -0,086159154 | 4,302790231 | 0,183746  | 0,672142182 |
| 4396 | ENSG00000142065 | 0,219182387  | 4,015712703 | 1,9279386 | 0,178221724 |
| 4397 | ENSG00000142082 | 0,299780489  | 4,338655092 | 2,3944961 | 0,135347412 |
| 4398 | ENSG00000142089 | -0,231458018 | 7,189725865 | 0,6171788 | 0,440077355 |
| 4399 | ENSG00000142156 | -0,169761733 | 7,410641096 | 0,7721844 | 0,388586503 |
| 4400 | ENSG00000142166 | 0,19717021   | 5,85159003  | 1,1231754 | 0,30018587  |
| 4401 | ENSG00000142168 | -0,497493334 | 7,469974462 | 5,6112181 | 0,026578347 |
| 4402 | ENSG00000142173 | -0,098403152 | 7,886251231 | 0,154567  | 0,697811566 |
| 4403 | ENSG00000142178 | 1,339696476  | 4,833836387 | 12,635997 | 0,001677727 |
| 4404 | ENSG00000142186 | 0,085972961  | 5,029917879 | 0,3287325 | 0,571942539 |
| 4405 | ENSG00000142188 | -0,26989624  | 5,705948168 | 4,6001971 | 0,042669042 |
| 4406 | ENSG00000142192 | -0,119667002 | 8,547154746 | 0,6462328 | 0,429625331 |
| 4407 | ENSG00000142197 | 0,086248646  | 3,795477364 | 0,2478484 | 0,694901283 |
| 4408 | ENSG00000142207 | 0,235364148  | 4,847388624 | 1,4164013 | 0,246077948 |
| 4409 | ENSG00000142208 | 0,12815028   | 5,497011712 | 0,359419  | 0,554661172 |
| 4410 | ENSG00000142227 | -0,409144509 | 4,647578743 | 3,0018079 | 0,096496962 |
| 4411 | ENSG00000142230 | 0,062937532  | 5,483730347 | 0,38285   | 0,572230499 |
| 4412 | ENSG00000142327 | -0,04329926  | 4,815450086 | 0,0319322 | 0,859733686 |
| 4413 | ENSG00000142507 | -0,358772673 | 5,797736966 | 5,3032902 | 0,030622134 |
| 4414 | ENSG00000142534 | 0,178315213  | 8,595290277 | 0,6587341 | 0,425287257 |
| 4415 | ENSG00000142541 | 0,27142005   | 9,26214037  | 1,3764974 | 0,252648158 |
| 4416 | ENSG00000142556 | -0,030686873 | 4,243909805 | 0,0441174 | 0,931074145 |
| 4417 | ENSG00000142599 | 0,094386152  | 6,785286155 | 0,2568677 | 0,617081535 |
| 4418 | ENSG00000142657 | -0,31496434  | 5,133945746 | 1,1955798 | 0,285472491 |
| 4419 | ENSG00000142661 | -0,038732311 | 7,605682798 | 0,015453  | 0,902144451 |
| 4420 | ENSG00000142676 | 0,087274787  | 8,653153121 | 0,1355879 | 0,716058204 |
| 4421 | ENSG00000142686 | 0,042739216  | 4,044528648 | 0,1305475 | 0,837849593 |
| 4422 | ENSG00000142687 | -0,034536447 | 6,259620759 | 0,0387543 | 0,845656977 |
| 4423 | ENSG00000142733 | -0,460646916 | 4,811861141 | 3,1359241 | 0,089773924 |

|      |                 |              |             |           |             |
|------|-----------------|--------------|-------------|-----------|-------------|
| 4424 | ENSG00000142751 | 0,147031696  | 3,861126019 | 1,0193805 | 0,460591079 |
| 4425 | ENSG00000142784 | 0,167533054  | 5,368502848 | 0,4854465 | 0,492914156 |
| 4426 | ENSG00000142798 | 0,695132147  | 7,15420829  | 3,0253063 | 0,095277973 |
| 4427 | ENSG00000142856 | 0,394858604  | 3,597377161 | 4,1560872 | 0,053083076 |
| 4428 | ENSG00000142864 | 0,03353136   | 7,346680116 | 0,0464832 | 0,831187156 |
| 4429 | ENSG00000142867 | 0,073732232  | 3,835216301 | 0,2243645 | 0,646798075 |
| 4430 | ENSG00000142871 | 0,414003496  | 6,610440294 | 0,8298478 | 0,371719903 |
| 4431 | ENSG00000142875 | -0,032934061 | 6,044100505 | 0,0631815 | 0,80374998  |
| 4432 | ENSG00000142892 | -0,538352644 | 5,885818078 | 3,4100064 | 0,077646547 |
| 4433 | ENSG00000142910 | -0,434893379 | 6,027728532 | 4,5384767 | 0,044002305 |
| 4434 | ENSG00000142937 | 0,237981953  | 8,446447092 | 1,0398226 | 0,318418438 |
| 4435 | ENSG00000142949 | 1,180706894  | 5,319880765 | 2,9916752 | 0,097028174 |
| 4436 | ENSG00000142961 | 0,00524141   | 4,416931814 | 0,0011207 | 0,973582125 |
| 4437 | ENSG00000143013 | 0,1938352    | 5,414488169 | 1,0061213 | 0,326220237 |
| 4438 | ENSG00000143033 | -0,000493034 | 4,51719041  | 1,318E-05 | 0,997134767 |
| 4439 | ENSG00000143061 | -0,245817551 | 4,668003274 | 1,4429506 | 0,241827828 |
| 4440 | ENSG00000143067 | 0,335382541  | 4,48480981  | 5,2783088 | 0,030953768 |
| 4441 | ENSG00000143079 | -0,024684105 | 4,75609185  | 0,0404316 | 0,898812389 |
| 4442 | ENSG00000143093 | 0,108265688  | 4,539315378 | 0,5110252 | 0,538005693 |
| 4443 | ENSG00000143106 | -0,241428655 | 5,552901745 | 1,9782157 | 0,172882175 |
| 4444 | ENSG00000143119 | -0,279383446 | 4,343786018 | 1,0672284 | 0,312261496 |
| 4445 | ENSG00000143126 | 0,19968153   | 4,577413476 | 0,2614325 | 0,613987818 |
| 4446 | ENSG00000143147 | 0,126792717  | 3,574243048 | 0,3676137 | 0,550217067 |
| 4447 | ENSG00000143149 | 0,261242739  | 6,180437928 | 2,9322568 | 0,100212423 |
| 4448 | ENSG00000143153 | -0,472886455 | 7,131792809 | 7,0471022 | 0,0141263   |
| 4449 | ENSG00000143155 | -0,137256844 | 5,344404698 | 0,4648069 | 0,502161186 |
| 4450 | ENSG00000143157 | 0,053733939  | 5,325831973 | 0,158192  | 0,694464721 |
| 4451 | ENSG00000143158 | -0,527435825 | 6,112514668 | 7,1813561 | 0,01334455  |
| 4452 | ENSG00000143162 | -0,132028065 | 6,586664504 | 0,6386084 | 0,432351198 |
| 4453 | ENSG00000143164 | -0,229233229 | 7,742967961 | 2,20443   | 0,151079643 |
| 4454 | ENSG00000143183 | -0,16103118  | 5,663995248 | 0,7620321 | 0,391672481 |
| 4455 | ENSG00000143190 | 0,054773037  | 5,497882168 | 0,1564117 | 0,696098428 |
| 4456 | ENSG00000143195 | 0,369975502  | 4,422398397 | 2,5269139 | 0,125505563 |
| 4457 | ENSG00000143196 | 0,92776801   | 5,871465671 | 12,498834 | 0,001759074 |
| 4458 | ENSG00000143198 | -0,12351598  | 7,572614802 | 0,5316185 | 0,473251622 |
| 4459 | ENSG00000143207 | -0,037127263 | 5,272622141 | 0,0869775 | 0,7706791   |
| 4460 | ENSG00000143222 | -0,079432971 | 5,496818259 | 0,2204853 | 0,643070092 |
| 4461 | ENSG00000143226 | -0,444049934 | 5,403595107 | 3,1220271 | 0,090444795 |
| 4462 | ENSG00000143248 | -0,415459144 | 8,589568598 | 2,8647264 | 0,103979992 |
| 4463 | ENSG00000143252 | -0,18489958  | 6,668957677 | 2,2073241 | 0,150823398 |
| 4464 | ENSG00000143294 | -0,161189708 | 4,161282411 | 0,7343216 | 0,400284022 |
| 4465 | ENSG00000143314 | -0,244539528 | 4,926369934 | 3,0319838 | 0,094896581 |
| 4466 | ENSG00000143315 | 0,069635333  | 3,656864569 | 0,2474639 | 0,734494422 |
| 4467 | ENSG00000143318 | -0,891984646 | 4,631539491 | 3,1440023 | 0,0893866   |
| 4468 | ENSG00000143321 | -0,238148436 | 6,361896027 | 2,420352  | 0,133343463 |
| 4469 | ENSG00000143322 | 0,033954951  | 5,699413999 | 0,0181219 | 0,894079594 |
| 4470 | ENSG00000143324 | 0,521666235  | 6,668056764 | 3,0139332 | 0,095865712 |
| 4471 | ENSG00000143337 | 0,240849782  | 6,379912731 | 5,8522376 | 0,023796702 |
| 4472 | ENSG00000143341 | 0,602241603  | 6,751141858 | 2,9134338 | 0,101246369 |
| 4473 | ENSG00000143344 | 0,033395424  | 5,811110142 | 0,0406709 | 0,841938968 |
| 4474 | ENSG00000143353 | -0,024875352 | 5,706876912 | 0,0074012 | 0,932183386 |
| 4475 | ENSG00000143363 | 0,100765203  | 5,12348264  | 0,3498598 | 0,559933794 |
| 4476 | ENSG00000143369 | -0,104061638 | 4,698519731 | 0,1704033 | 0,683557942 |
| 4477 | ENSG00000143374 | 0,054560381  | 4,289955413 | 0,0934064 | 0,762626203 |
| 4478 | ENSG00000143376 | -0,093549182 | 5,73164044  | 0,3274995 | 0,572660133 |
| 4479 | ENSG00000143379 | 0,04245866   | 4,361160725 | 0,0656768 | 0,800005879 |
| 4480 | ENSG00000143382 | -0,98207936  | 5,013664269 | 7,7192664 | 0,010658699 |
| 4481 | ENSG00000143384 | 0,412168186  | 7,823998148 | 3,2748469 | 0,08337392  |
| 4482 | ENSG00000143387 | 0,468452162  | 4,913727666 | 2,8969853 | 0,102160053 |

|      |                 |              |             |           |             |
|------|-----------------|--------------|-------------|-----------|-------------|
| 4483 | ENSG00000143390 | 0,080732689  | 4,664244574 | 0,4597553 | 0,644345701 |
| 4484 | ENSG00000143393 | 0,179123707  | 5,244051642 | 1,0321463 | 0,320172737 |
| 4485 | ENSG00000143398 | 0,102132701  | 5,490616787 | 0,3928231 | 0,536961358 |
| 4486 | ENSG00000143401 | 0,112059245  | 5,736990695 | 0,2310612 | 0,63525687  |
| 4487 | ENSG00000143409 | 0,227495166  | 4,934732659 | 1,199451  | 0,284713178 |
| 4488 | ENSG00000143416 | 0,101896005  | 5,500251465 | 0,0746408 | 0,78712218  |
| 4489 | ENSG00000143418 | 0,245803519  | 4,644478497 | 1,3979257 | 0,249092284 |
| 4490 | ENSG00000143420 | -0,009477041 | 6,781464655 | 0,0072802 | 0,932735814 |
| 4491 | ENSG00000143429 | -0,077158157 | 3,877049221 | 0,1194789 | 0,732726741 |
| 4492 | ENSG00000143434 | 0,080777924  | 4,680365824 | 0,1051931 | 0,748601609 |
| 4493 | ENSG00000143436 | -0,164876824 | 3,634160144 | 2,1369515 | 0,400553093 |
| 4494 | ENSG00000143437 | 0,149806731  | 5,758890109 | 1,233015  | 0,278201109 |
| 4495 | ENSG00000143442 | 0,295930634  | 5,932122701 | 2,4701801 | 0,129614903 |
| 4496 | ENSG00000143457 | 0,171937255  | 4,310188066 | 1,5310331 | 0,228342509 |
| 4497 | ENSG00000143458 | 0,247522108  | 5,008243543 | 4,1159284 | 0,054112461 |
| 4498 | ENSG00000143479 | 0,05130804   | 4,970877221 | 0,0511093 | 0,823131372 |
| 4499 | ENSG00000143486 | 0,202349395  | 5,052491265 | 3,9413705 | 0,078169352 |
| 4500 | ENSG00000143493 | -0,266302226 | 4,073480405 | 6,6884448 | 0,103110033 |
| 4501 | ENSG00000143499 | 1,634845956  | 4,304712523 | 30,20047  | 1,35372E-05 |
| 4502 | ENSG00000143514 | 0,035508922  | 5,298795753 | 0,0714894 | 0,791543598 |
| 4503 | ENSG00000143515 | 0,37690257   | 5,072240737 | 3,1703377 | 0,088137231 |
| 4504 | ENSG00000143537 | -0,364318705 | 5,66396402  | 2,3210444 | 0,141200826 |
| 4505 | ENSG00000143543 | -0,018151625 | 3,893156483 | 0,0147518 | 0,913619076 |
| 4506 | ENSG00000143546 | -0,73810636  | 6,048003591 | 1,5614888 | 0,223953686 |
| 4507 | ENSG00000143549 | -0,439907141 | 8,248088365 | 2,2672    | 0,145683789 |
| 4508 | ENSG00000143553 | -0,177162003 | 4,743682293 | 1,9090643 | 0,188513543 |
| 4509 | ENSG00000143569 | 0,083687651  | 6,020747913 | 0,2343095 | 0,63290163  |
| 4510 | ENSG00000143575 | -0,365126595 | 6,272363965 | 5,4485349 | 0,028634956 |
| 4511 | ENSG00000143612 | -0,358362322 | 7,200866918 | 8,6867736 | 0,007188975 |
| 4512 | ENSG00000143614 | 0,183437495  | 5,17779493  | 0,572529  | 0,456899863 |
| 4513 | ENSG00000143621 | -0,001021154 | 6,141608824 | 8,682E-05 | 0,992645197 |
| 4514 | ENSG00000143622 | -0,098501665 | 4,871266622 | 0,5051681 | 0,484331816 |
| 4515 | ENSG00000143624 | 0,29591478   | 5,828236391 | 2,664063  | 0,11618969  |
| 4516 | ENSG00000143632 | 0,085900123  | 9,725192976 | 0,0366654 | 0,84982015  |
| 4517 | ENSG00000143641 | -0,283266938 | 5,014077576 | 2,4464169 | 0,131383258 |
| 4518 | ENSG00000143643 | -0,056981111 | 3,915931897 | 0,2113748 | 0,757465764 |
| 4519 | ENSG00000143653 | -0,110339211 | 5,407244665 | 0,3758989 | 0,545792758 |
| 4520 | ENSG00000143669 | 0,158789829  | 6,485344629 | 0,7696768 | 0,389345367 |
| 4521 | ENSG00000143702 | 0,082516268  | 6,146346786 | 0,5945538 | 0,448447947 |
| 4522 | ENSG00000143727 | -0,130232372 | 5,560576992 | 0,7212069 | 0,404459011 |
| 4523 | ENSG00000143740 | 0,366823465  | 4,512338956 | 2,6518869 | 0,116983072 |
| 4524 | ENSG00000143742 | -0,366272406 | 7,382345155 | 2,2013717 | 0,15139777  |
| 4525 | ENSG00000143748 | 0,013569824  | 3,981983295 | 0,0143827 | 0,92651223  |
| 4526 | ENSG00000143751 | -0,012731564 | 4,646603585 | 0,0121384 | 0,968906779 |
| 4527 | ENSG00000143753 | -0,094364921 | 5,400959379 | 0,53518   | 0,471764411 |
| 4528 | ENSG00000143756 | -0,030280058 | 5,394645895 | 0,0343906 | 0,854496241 |
| 4529 | ENSG00000143761 | 0,083322535  | 7,404250971 | 0,3905346 | 0,538118574 |
| 4530 | ENSG00000143771 | -0,087169675 | 5,245101978 | 0,3877186 | 0,539580387 |
| 4531 | ENSG00000143772 | -0,209912435 | 4,484167825 | 0,910248  | 0,349921141 |
| 4532 | ENSG00000143774 | 0,144934864  | 5,933595598 | 0,5510414 | 0,465370208 |
| 4533 | ENSG00000143776 | -0,197074299 | 7,131460379 | 2,2522739 | 0,14690956  |
| 4534 | ENSG00000143797 | 0,074071186  | 4,682453674 | 0,0906369 | 0,7660607   |
| 4535 | ENSG00000143799 | 0,009353213  | 6,187879749 | 0,0061133 | 0,938349697 |
| 4536 | ENSG00000143801 | -0,124060366 | 3,874023394 | 0,750361  | 0,456134294 |
| 4537 | ENSG00000143811 | -0,006103539 | 4,374688153 | 0,0021414 | 0,963486758 |
| 4538 | ENSG00000143815 | -0,103830485 | 4,994284025 | 0,3938143 | 0,536452457 |
| 4539 | ENSG00000143819 | 0,118944448  | 5,212090612 | 0,1083323 | 0,745014756 |
| 4540 | ENSG00000143847 | 0,337994854  | 4,855786202 | 1,3627353 | 0,254966468 |
| 4541 | ENSG00000143850 | 1,132702163  | 5,051454224 | 14,555977 | 0,000883185 |

|      |                 |              |             |           |              |
|------|-----------------|--------------|-------------|-----------|--------------|
| 4542 | ENSG00000143862 | 0,005332445  | 4,164569652 | 0,0018063 | 0,985889832  |
| 4543 | ENSG00000143867 | -1,098616083 | 4,694290377 | 20,757093 | 0,000139284  |
| 4544 | ENSG00000143870 | -0,055047776 | 6,248913511 | 0,1636913 | 0,689487413  |
| 4545 | ENSG00000143878 | 0,231935662  | 6,927572604 | 1,3632091 | 0,254886193  |
| 4546 | ENSG00000143889 | 0,115906151  | 5,248438526 | 0,5748778 | 0,455989266  |
| 4547 | ENSG00000143891 | -0,098717701 | 4,14763016  | 0,576605  | 0,516861086  |
| 4548 | ENSG00000143924 | 0,190779429  | 5,240195284 | 0,8990525 | 0,352845202  |
| 4549 | ENSG00000143933 | -0,296931259 | 8,650458691 | 1,5351154 | 0,227781541  |
| 4550 | ENSG00000143947 | 0,216544522  | 8,591944929 | 0,7939362 | 0,382094602  |
| 4551 | ENSG00000143951 | 0,167828684  | 4,7321235   | 1,5378746 | 0,227334241  |
| 4552 | ENSG00000143952 | 0,038653207  | 5,540774017 | 0,0738884 | 0,788165936  |
| 4553 | ENSG00000143970 | 0,131449382  | 5,742875062 | 0,9097172 | 0,350028036  |
| 4554 | ENSG00000143971 | -0,061218711 | 4,447283817 | 0,1065541 | 0,747039327  |
| 4555 | ENSG00000143977 | -0,363756816 | 4,777997597 | 3,8515425 | 0,061847914  |
| 4556 | ENSG00000143995 | -0,703178572 | 5,563737675 | 13,891708 | 0,001097978  |
| 4557 | ENSG00000144021 | -0,012962466 | 5,793120996 | 0,0195925 | 0,889889491  |
| 4558 | ENSG00000144026 | 0,225141964  | 4,541267086 | 3,0260511 | 0,095193204  |
| 4559 | ENSG00000144028 | 0,22098498   | 6,759257347 | 1,1740455 | 0,28974588   |
| 4560 | ENSG00000144029 | -0,440356051 | 5,680964883 | 11,233675 | 0,002741423  |
| 4561 | ENSG00000144034 | -0,584576613 | 4,041253231 | 7,56756   | 0,011350064  |
| 4562 | ENSG00000144036 | 0,134088066  | 7,601272454 | 0,5529041 | 0,464625769  |
| 4563 | ENSG00000144043 | 0,065440627  | 5,463980182 | 0,2144089 | 0,647652331  |
| 4564 | ENSG00000144048 | 0,067370431  | 3,909439496 | 0,3318249 | 0,670157908  |
| 4565 | ENSG00000144061 | 0,037545505  | 3,609173528 | 0,0568783 | 0,820618     |
| 4566 | ENSG00000144063 | -0,409097683 | 4,186009488 | 3,6251439 | 0,069435731  |
| 4567 | ENSG00000144115 | -0,236003139 | 4,411216743 | 1,1361766 | 0,297470291  |
| 4568 | ENSG00000144118 | -0,077208725 | 5,673426826 | 0,7964048 | 0,416185616  |
| 4569 | ENSG00000144136 | 0,849310365  | 5,807065245 | 4,2096498 | 0,051691879  |
| 4570 | ENSG00000144161 | -0,038910449 | 4,050366543 | 0,1052886 | 0,811051215  |
| 4571 | ENSG00000144199 | -0,113421549 | 4,27279463  | 0,4990057 | 0,486997998  |
| 4572 | ENSG00000144218 | -0,010956547 | 4,530271441 | 0,0052033 | 0,9431115902 |
| 4573 | ENSG00000144224 | 0,006369035  | 6,720815253 | 0,0015399 | 0,969034873  |
| 4574 | ENSG00000144228 | 0,02468669   | 5,163561732 | 0,0171527 | 0,896933745  |
| 4575 | ENSG00000144231 | 0,090877498  | 4,447769089 | 0,5565628 | 0,556860582  |
| 4576 | ENSG00000144233 | 0,151032946  | 4,287555402 | 1,3382284 | 0,350611367  |
| 4577 | ENSG00000144283 | -0,067848837 | 6,246272473 | 0,248565  | 0,622782567  |
| 4578 | ENSG00000144306 | -0,199704761 | 4,801112183 | 1,1399571 | 0,29668686   |
| 4579 | ENSG00000144320 | -0,206556212 | 5,753124715 | 1,8894944 | 0,182440792  |
| 4580 | ENSG00000144331 | 1,297066913  | 4,656767986 | 12,667649 | 0,001659546  |
| 4581 | ENSG00000144357 | -0,224739974 | 7,827357607 | 1,3076611 | 0,264524821  |
| 4582 | ENSG00000144366 | -0,287505027 | 3,907202452 | 1,2096036 | 0,282734465  |
| 4583 | ENSG00000144369 | 0,291211315  | 3,941115309 | 1,3141605 | 0,263372849  |
| 4584 | ENSG00000144381 | -0,124978129 | 7,456918312 | 0,681061  | 0,417631902  |
| 4585 | ENSG00000144426 | 0,073265493  | 6,64005682  | 0,2129028 | 0,648814737  |
| 4586 | ENSG00000144445 | -0,019430217 | 5,605044951 | 0,0227368 | 0,881447146  |
| 4587 | ENSG00000144451 | 0,007023877  | 4,455703388 | 0,0013286 | 0,971236466  |
| 4588 | ENSG00000144455 | 0,206493528  | 4,510589554 | 1,8725806 | 0,184328738  |
| 4589 | ENSG00000144468 | -0,080560174 | 5,037238239 | 0,6186541 | 0,479481915  |
| 4590 | ENSG00000144476 | -0,673949376 | 4,941222654 | 7,3940302 | 0,012202256  |
| 4591 | ENSG00000144524 | -0,009740671 | 4,009287737 | 0,0041838 | 0,948983366  |
| 4592 | ENSG00000144535 | -0,022423938 | 4,175132096 | 0,0286241 | 0,867116737  |
| 4593 | ENSG00000144560 | 0,472175492  | 4,309082842 | 6,5460861 | 0,017524795  |
| 4594 | ENSG00000144566 | 0,00669858   | 5,530404012 | 0,0035425 | 0,953048608  |
| 4595 | ENSG00000144567 | 0,35201628   | 5,132637903 | 4,5752095 | 0,04322655   |
| 4596 | ENSG00000144579 | 0,185410954  | 5,623097043 | 1,0754936 | 0,310436555  |
| 4597 | ENSG00000144580 | -0,088440651 | 4,86207767  | 0,7650828 | 0,439482589  |
| 4598 | ENSG00000144596 | 0,59178493   | 4,489503605 | 3,0589484 | 0,093563709  |
| 4599 | ENSG00000144597 | 0,247362029  | 3,5879469   | 3,5854119 | 0,205271979  |
| 4600 | ENSG00000144635 | -0,161891856 | 5,637502479 | 1,8318132 | 0,188957766  |

|      |                 |              |             |           |             |
|------|-----------------|--------------|-------------|-----------|-------------|
| 4601 | ENSG00000144642 | 0,45733228   | 6,748097194 | 5,5690622 | 0,027094975 |
| 4602 | ENSG00000144655 | 1,111178955  | 4,883319438 | 9,2786676 | 0,005713167 |
| 4603 | ENSG00000144659 | -0,009589075 | 3,949396341 | 0,0049894 | 0,964226205 |
| 4604 | ENSG00000144668 | 0,105802769  | 5,540340774 | 0,2783973 | 0,602782564 |
| 4605 | ENSG00000144674 | -0,112126543 | 8,633234314 | 0,2601346 | 0,614863934 |
| 4606 | ENSG00000144677 | -0,164563052 | 5,973457738 | 2,5977177 | 0,120543582 |
| 4607 | ENSG00000144711 | 0,022484761  | 5,834670734 | 0,0099242 | 0,921504809 |
| 4608 | ENSG00000144712 | 0,074768538  | 5,314229826 | 0,0683989 | 0,795998844 |
| 4609 | ENSG00000144713 | 0,09544222   | 8,49035779  | 0,1693397 | 0,684490276 |
| 4610 | ENSG00000144724 | -0,504659714 | 6,655216729 | 7,9077204 | 0,009863813 |
| 4611 | ENSG00000144730 | -0,07766376  | 3,608437695 | 0,2420336 | 0,666140299 |
| 4612 | ENSG00000144736 | 0,197009886  | 4,441494922 | 3,1113283 | 0,150566846 |
| 4613 | ENSG00000144741 | -0,664499253 | 4,850108768 | 21,072038 | 0,000127214 |
| 4614 | ENSG00000144744 | -0,458266863 | 5,948379747 | 3,5632202 | 0,071692524 |
| 4615 | ENSG00000144746 | -0,231176005 | 7,606203811 | 2,5352334 | 0,12486883  |
| 4616 | ENSG00000144747 | 0,185083425  | 5,838708841 | 1,7175692 | 0,202846564 |
| 4617 | ENSG00000144749 | -0,130679303 | 6,406891182 | 0,3804051 | 0,543414734 |
| 4618 | ENSG00000144791 | 0,167937622  | 4,277291714 | 0,8322895 | 0,371029448 |
| 4619 | ENSG00000144792 | 0,004708897  | 3,404945109 | 0,0007865 | 0,977866813 |
| 4620 | ENSG00000144802 | 0,535903324  | 5,762603171 | 1,5066263 | 0,232009993 |
| 4621 | ENSG00000144810 | 1,126449981  | 6,098380449 | 20,767227 | 0,000138897 |
| 4622 | ENSG00000144815 | -0,205776851 | 5,722916609 | 1,0849067 | 0,308375769 |
| 4623 | ENSG00000144824 | 0,462162512  | 7,060450079 | 5,4291847 | 0,028891184 |
| 4624 | ENSG00000144827 | -0,127329445 | 5,082744329 | 0,4255733 | 0,520604946 |
| 4625 | ENSG00000144840 | -0,046973143 | 4,535761555 | 0,0860626 | 0,771861754 |
| 4626 | ENSG00000144848 | -0,123275021 | 5,149801451 | 0,8382538 | 0,369321096 |
| 4627 | ENSG00000144857 | -0,028855822 | 3,915492733 | 0,0139457 | 0,907015143 |
| 4628 | ENSG00000144867 | -0,04462314  | 5,084563399 | 0,0882289 | 0,769094084 |
| 4629 | ENSG00000144895 | -0,245192041 | 6,693726095 | 1,1719471 | 0,290166847 |
| 4630 | ENSG00000144908 | -0,108115586 | 4,671134126 | 0,0569427 | 0,813498096 |
| 4631 | ENSG00000144909 | -0,284833428 | 4,436273802 | 3,3961532 | 0,078212291 |
| 4632 | ENSG00000144935 | -0,125575336 | 5,479737214 | 0,550739  | 0,465491274 |
| 4633 | ENSG00000144959 | -0,358367824 | 4,626941475 | 3,2484305 | 0,084549286 |
| 4634 | ENSG00000145012 | -0,046799629 | 8,846947028 | 0,1069202 | 0,746610768 |
| 4635 | ENSG00000145022 | 0,293642533  | 3,965701849 | 5,0773448 | 0,101835238 |
| 4636 | ENSG00000145041 | 0,018836412  | 4,770719344 | 0,0213534 | 0,987423991 |
| 4637 | ENSG00000145050 | -0,283151232 | 4,658710242 | 1,2290527 | 0,278994474 |
| 4638 | ENSG00000145147 | 0,538166563  | 5,383175127 | 4,2298265 | 0,051178561 |
| 4639 | ENSG00000145191 | -0,097895255 | 5,30365358  | 0,7572378 | 0,39311153  |
| 4640 | ENSG00000145216 | 0,0940186    | 3,897016322 | 0,5136049 | 0,584015879 |
| 4641 | ENSG00000145220 | -0,248531836 | 4,012236823 | 2,1459508 | 0,162090801 |
| 4642 | ENSG00000145241 | 0,142637141  | 5,723290617 | 0,7015509 | 0,4108409   |
| 4643 | ENSG00000145244 | 0,118525387  | 7,709627449 | 0,1441374 | 0,707668054 |
| 4644 | ENSG00000145246 | 0,33094475   | 5,209931663 | 5,5114198 | 0,027796607 |
| 4645 | ENSG00000145293 | -0,051247533 | 4,277098584 | 0,1811691 | 0,792431941 |
| 4646 | ENSG00000145332 | 0,031687127  | 4,834448417 | 0,0436635 | 0,836311516 |
| 4647 | ENSG00000145337 | -0,1032379   | 5,230425541 | 0,3737749 | 0,546920512 |
| 4648 | ENSG00000145348 | 0,177345842  | 5,424775567 | 1,6062095 | 0,217613028 |
| 4649 | ENSG00000145349 | 0,040286759  | 7,807151241 | 0,0383894 | 0,846375649 |
| 4650 | ENSG00000145354 | -0,260564046 | 4,245870095 | 1,7006806 | 0,205037694 |
| 4651 | ENSG00000145362 | -0,125335452 | 8,43948105  | 0,2891324 | 0,595917109 |
| 4652 | ENSG00000145365 | -0,072656302 | 3,94761873  | 0,2061944 | 0,673211639 |
| 4653 | ENSG00000145375 | 0,023455514  | 4,421473761 | 0,0461187 | 0,893483811 |
| 4654 | ENSG00000145388 | 0,001281998  | 4,952553977 | 9,52E-05  | 0,992298729 |
| 4655 | ENSG00000145390 | -0,140959695 | 7,12126072  | 0,5360759 | 0,471423387 |
| 4656 | ENSG00000145391 | 0,283418966  | 7,224404097 | 7,4777778 | 0,011760589 |
| 4657 | ENSG00000145414 | 0,345550121  | 3,626689547 | 1,8476723 | 0,1871703   |
| 4658 | ENSG00000145416 | -0,233819324 | 4,515282203 | 0,6605605 | 0,424655128 |
| 4659 | ENSG00000145425 | 0,25153678   | 8,971468727 | 1,0244921 | 0,32193522  |



|      |                 |              |             |           |             |
|------|-----------------|--------------|-------------|-----------|-------------|
| 4660 | ENSG00000145431 | 0,752512168  | 4,89657714  | 7,2517953 | 0,012953622 |
| 4661 | ENSG00000145439 | -0,217085432 | 5,128282661 | 3,214281  | 0,086051311 |
| 4662 | ENSG00000145476 | -0,131322102 | 5,401214305 | 0,3985711 | 0,534022548 |
| 4663 | ENSG00000145494 | -0,508277138 | 5,768962196 | 5,4292135 | 0,028890801 |
| 4664 | ENSG00000145495 | -0,105320015 | 7,628339264 | 0,6195544 | 0,439182445 |
| 4665 | ENSG00000145555 | 0,300382983  | 4,156119355 | 1,3271859 | 0,261083783 |
| 4666 | ENSG00000145592 | 0,196608343  | 8,110200535 | 0,7409741 | 0,398190958 |
| 4667 | ENSG00000145623 | -0,6732602   | 6,087823363 | 6,00398   | 0,022258971 |
| 4668 | ENSG00000145632 | -0,398620881 | 6,930029879 | 2,193553  | 0,152094136 |
| 4669 | ENSG00000145675 | -0,05016892  | 7,983286445 | 0,0335153 | 0,856338089 |
| 4670 | ENSG00000145685 | -0,005605039 | 5,174424078 | 0,0005775 | 0,981033324 |
| 4671 | ENSG00000145687 | 0,167444781  | 5,849990578 | 2,3685042 | 0,137338064 |
| 4672 | ENSG00000145703 | -0,431065894 | 4,70440667  | 2,2988931 | 0,143024883 |
| 4673 | ENSG00000145715 | 0,029934246  | 5,696816575 | 0,0542362 | 0,817892288 |
| 4674 | ENSG00000145723 | -0,316903599 | 4,302023161 | 2,2414739 | 0,147885598 |
| 4675 | ENSG00000145725 | -0,205801184 | 6,295948445 | 1,3751999 | 0,252865561 |
| 4676 | ENSG00000145730 | -0,151726707 | 11,26613065 | 0,3242626 | 0,574535755 |
| 4677 | ENSG00000145734 | -0,052457594 | 6,648417461 | 0,1733619 | 0,680968892 |
| 4678 | ENSG00000145736 | -0,062007293 | 5,154415631 | 0,1009733 | 0,753517835 |
| 4679 | ENSG00000145740 | 0,252487014  | 5,368515164 | 3,1922057 | 0,087087291 |
| 4680 | ENSG00000145741 | 0,038159909  | 7,445463025 | 0,0919069 | 0,764469283 |
| 4681 | ENSG00000145743 | -0,189071063 | 5,835219505 | 1,2824254 | 0,269060491 |
| 4682 | ENSG00000145780 | -0,273094967 | 6,249440585 | 1,9062365 | 0,180588589 |
| 4683 | ENSG00000145781 | -0,349447242 | 5,039969871 | 2,536422  | 0,124832024 |
| 4684 | ENSG00000145782 | -0,07279284  | 5,363096361 | 0,319319  | 0,577442661 |
| 4685 | ENSG00000145817 | 0,096953748  | 5,239566337 | 0,2711821 | 0,607493309 |
| 4686 | ENSG00000145819 | -0,384891299 | 6,425745066 | 3,8804022 | 0,060950366 |
| 4687 | ENSG00000145833 | -0,103268335 | 5,650954233 | 0,9496625 | 0,339859969 |
| 4688 | ENSG00000145860 | 0,038794378  | 5,410648205 | 0,0563996 | 0,814372254 |
| 4689 | ENSG00000145868 | 0,12191071   | 5,912775096 | 1,4085004 | 0,247319586 |
| 4690 | ENSG00000145901 | 0,324683792  | 5,928633006 | 3,3948489 | 0,078265804 |
| 4691 | ENSG00000145907 | 0,098366592  | 7,265330575 | 0,7425339 | 0,397671968 |
| 4692 | ENSG00000145916 | -0,144593219 | 4,563548794 | 0,7442881 | 0,39715443  |
| 4693 | ENSG00000145919 | -0,015010821 | 5,04319666  | 0,0182301 | 0,952555128 |
| 4694 | ENSG00000145934 | 0,76085863   | 5,29570032  | 3,4782326 | 0,074927871 |
| 4695 | ENSG00000145979 | -0,592957905 | 4,274620445 | 12,702931 | 0,001639533 |
| 4696 | ENSG00000145982 | -0,461693918 | 4,147768894 | 8,0446942 | 0,009327134 |
| 4697 | ENSG00000145990 | -0,677230823 | 6,853008449 | 8,9374985 | 0,00652663  |
| 4698 | ENSG00000145996 | -0,177346703 | 4,740574366 | 2,032888  | 0,183140656 |
| 4699 | ENSG00000146006 | -0,181632412 | 3,494840491 | 0,5292452 | 0,474229839 |
| 4700 | ENSG00000146007 | -0,130035862 | 5,316463483 | 0,5326791 | 0,472815542 |
| 4701 | ENSG00000146021 | 0,500423548  | 6,080818492 | 4,6184542 | 0,042332941 |
| 4702 | ENSG00000146066 | -0,21662585  | 4,802312197 | 2,1937432 | 0,152049437 |
| 4703 | ENSG00000146067 | -0,020375045 | 4,301424917 | 0,0144957 | 0,905208343 |
| 4704 | ENSG00000146072 | 0,382720855  | 4,187930312 | 1,250037  | 0,275032157 |
| 4705 | ENSG00000146085 | -0,270215309 | 5,927410214 | 2,2770129 | 0,144854276 |
| 4706 | ENSG00000146112 | -0,130567801 | 4,571482098 | 0,4062728 | 0,530131325 |
| 4707 | ENSG00000146122 | -0,227398606 | 4,347014458 | 0,5527355 | 0,464693102 |
| 4708 | ENSG00000146147 | -0,452496498 | 7,828427065 | 2,3034482 | 0,142647506 |
| 4709 | ENSG00000146223 | -0,12213428  | 6,452459703 | 1,4979179 | 0,233279756 |
| 4710 | ENSG00000146243 | 0,093037352  | 3,508752438 | 0,5113691 | 0,63528246  |
| 4711 | ENSG00000146247 | -0,020636462 | 7,11999468  | 0,0168055 | 0,89797604  |
| 4712 | ENSG00000146263 | -0,037891554 | 3,759955303 | 0,0675171 | 0,855459759 |
| 4713 | ENSG00000146278 | 0,216695902  | 7,048417787 | 2,0314283 | 0,16742242  |
| 4714 | ENSG00000146281 | 0,019316201  | 4,59467045  | 0,0128348 | 0,910778456 |
| 4715 | ENSG00000146282 | -0,001804521 | 5,233145702 | 0,0002202 | 0,988288521 |
| 4716 | ENSG00000146350 | 0,138850998  | 3,768646125 | 0,51737   | 0,47917589  |
| 4717 | ENSG00000146373 | 0,181364466  | 5,527181394 | 0,702913  | 0,410393731 |
| 4718 | ENSG00000146376 | 0,689345672  | 5,355693063 | 2,1261385 | 0,158260678 |

|      |                 |              |             |           |             |
|------|-----------------|--------------|-------------|-----------|-------------|
| 4719 | ENSG00000146411 | 0,248540161  | 4,212240868 | 0,6598882 | 0,424887655 |
| 4720 | ENSG00000146414 | -0,11250108  | 6,009160087 | 0,6960235 | 0,412633584 |
| 4721 | ENSG00000146416 | -0,137646545 | 5,370673007 | 1,0302133 | 0,320582726 |
| 4722 | ENSG00000146425 | 0,161265645  | 5,189928111 | 1,4310734 | 0,243675555 |
| 4723 | ENSG00000146426 | 0,204838648  | 3,783958636 | 1,4695965 | 0,297449741 |
| 4724 | ENSG00000146433 | 0,068204591  | 5,389333911 | 0,2953141 | 0,592020305 |
| 4725 | ENSG00000146457 | 0,075880376  | 6,028721588 | 0,1574812 | 0,695126694 |
| 4726 | ENSG00000146463 | 0,251964443  | 6,060994184 | 6,1978917 | 0,020390507 |
| 4727 | ENSG00000146476 | -0,302096706 | 4,755301628 | 1,8550112 | 0,186329584 |
| 4728 | ENSG00000146530 | -0,625308237 | 4,587658036 | 3,3778111 | 0,078968659 |
| 4729 | ENSG00000146535 | -0,165069968 | 5,309755024 | 0,5792901 | 0,454286585 |
| 4730 | ENSG00000146556 | 0,109783068  | 4,388875799 | 0,3435861 | 0,563447664 |
| 4731 | ENSG00000146574 | 0,089084521  | 5,596848826 | 0,2931688 | 0,593378406 |
| 4732 | ENSG00000146587 | -0,079451017 | 4,919759874 | 0,2710807 | 0,607560106 |
| 4733 | ENSG00000146592 | 0,152788262  | 5,047272254 | 0,2610894 | 0,614219178 |
| 4734 | ENSG00000146648 | -0,470186316 | 5,876164159 | 2,4569386 | 0,130596773 |
| 4735 | ENSG00000146674 | 1,24291824   | 6,524892052 | 9,7966108 | 0,00468321  |
| 4736 | ENSG00000146676 | 0,163304254  | 6,002269528 | 1,5410083 | 0,226876096 |
| 4737 | ENSG00000146701 | -0,440524548 | 7,571171152 | 4,8758545 | 0,037425121 |
| 4738 | ENSG00000146729 | -0,304863299 | 7,640294329 | 1,9142002 | 0,179715627 |
| 4739 | ENSG00000146731 | -0,220837952 | 6,571011028 | 1,9734274 | 0,173382232 |
| 4740 | ENSG00000146757 | 0,019925658  | 3,631950353 | 0,0132666 | 0,90929655  |
| 4741 | ENSG00000146802 | -0,109059705 | 5,752438477 | 0,5079365 | 0,483167171 |
| 4742 | ENSG00000146809 | -0,448619215 | 4,981708289 | 1,0921924 | 0,306793458 |
| 4743 | ENSG00000146830 | 0,375530995  | 5,000400531 | 3,6149383 | 0,069802021 |
| 4744 | ENSG00000146833 | 0,512796091  | 4,378621436 | 6,8740027 | 0,015210031 |
| 4745 | ENSG00000146834 | 0,403239754  | 4,105412351 | 5,3997207 | 0,029286267 |
| 4746 | ENSG00000146842 | 0,219080388  | 3,926819689 | 3,1497026 | 0,19878936  |
| 4747 | ENSG00000146859 | 0,507926355  | 3,77998134  | 6,3785621 | 0,018856174 |
| 4748 | ENSG00000146872 | -0,201965423 | 5,332706604 | 5,0950045 | 0,048788423 |
| 4749 | ENSG00000146909 | -0,085748516 | 3,992494592 | 0,3912599 | 0,577858413 |
| 4750 | ENSG00000146963 | -0,09498417  | 5,042044484 | 0,352645  | 0,558387498 |
| 4751 | ENSG00000146966 | -0,140061392 | 3,9505915   | 0,2384785 | 0,629908281 |
| 4752 | ENSG00000147010 | -0,519532587 | 5,39475846  | 11,295148 | 0,002690297 |
| 4753 | ENSG00000147027 | 0,322502574  | 6,041041052 | 3,7482346 | 0,065186438 |
| 4754 | ENSG00000147044 | 0,376469721  | 4,747215342 | 5,7077605 | 0,025436089 |
| 4755 | ENSG00000147050 | -0,056174334 | 5,142601527 | 0,0903634 | 0,766403078 |
| 4756 | ENSG00000147065 | 0,190555237  | 7,575051814 | 1,3026386 | 0,265411716 |
| 4757 | ENSG00000147099 | -0,063872598 | 4,497647735 | 0,205091  | 0,654853827 |
| 4758 | ENSG00000147100 | 0,565354466  | 4,192907525 | 4,1226788 | 0,053972253 |
| 4759 | ENSG00000147113 | -0,655320422 | 4,952124649 | 11,247802 | 0,002736609 |
| 4760 | ENSG00000147121 | 0,132357188  | 3,657085948 | 1,4463809 | 0,489319373 |
| 4761 | ENSG00000147123 | -0,530618856 | 5,912858118 | 6,9741678 | 0,01457214  |
| 4762 | ENSG00000147124 | -0,154566425 | 4,740236895 | 0,8789842 | 0,358174368 |
| 4763 | ENSG00000147130 | 0,440763657  | 4,362827838 | 3,7219982 | 0,066066685 |
| 4764 | ENSG00000147133 | 0,219260248  | 5,913483574 | 2,5204981 | 0,125919706 |
| 4765 | ENSG00000147140 | 0,187248364  | 6,777430182 | 1,8269097 | 0,189528918 |
| 4766 | ENSG00000147162 | 0,263154311  | 7,727272478 | 3,9121471 | 0,059937518 |
| 4767 | ENSG00000147164 | 0,066624667  | 4,983321258 | 0,4002303 | 0,652091782 |
| 4768 | ENSG00000147166 | -0,815945818 | 5,912088423 | 8,3234528 | 0,008331594 |
| 4769 | ENSG00000147180 | -0,012471959 | 3,8494975   | 0,0026369 | 0,959487004 |
| 4770 | ENSG00000147202 | -0,037958589 | 5,558684728 | 0,0383829 | 0,846388578 |
| 4771 | ENSG00000147224 | -0,098077015 | 4,46653059  | 0,7556036 | 0,531052374 |
| 4772 | ENSG00000147251 | 0,310005562  | 5,846499787 | 0,4705063 | 0,499577737 |
| 4773 | ENSG00000147274 | 0,133279003  | 6,995191205 | 1,0912807 | 0,306953525 |
| 4774 | ENSG00000147316 | -0,125484372 | 4,75966294  | 1,9220301 | 0,340602213 |
| 4775 | ENSG00000147324 | -0,298743491 | 4,149314021 | 5,0758693 | 0,059613169 |
| 4776 | ENSG00000147364 | 0,106573805  | 5,452693776 | 0,701982  | 0,410669598 |
| 4777 | ENSG00000147400 | 0,08574609   | 4,792032217 | 0,1503696 | 0,701730675 |

|      |                 |              |             |           |             |
|------|-----------------|--------------|-------------|-----------|-------------|
| 4778 | ENSG00000147403 | 0,38581953   | 9,074481004 | 3,7084191 | 0,066491644 |
| 4779 | ENSG00000147408 | -0,034182238 | 6,018913467 | 0,0395591 | 0,844084271 |
| 4780 | ENSG00000147416 | -0,123367359 | 6,164019209 | 1,3661207 | 0,25435247  |
| 4781 | ENSG00000147419 | -0,239397065 | 5,135139322 | 1,6737274 | 0,208539851 |
| 4782 | ENSG00000147421 | 0,075158363  | 5,678869507 | 0,3392442 | 0,565885501 |
| 4783 | ENSG00000147454 | 0,217128617  | 5,566406613 | 0,6366799 | 0,433037731 |
| 4784 | ENSG00000147457 | -0,138280829 | 4,926595017 | 1,1327585 | 0,29814303  |
| 4785 | ENSG00000147459 | -0,157198556 | 5,583051228 | 1,1183142 | 0,301209811 |
| 4786 | ENSG00000147471 | 0,139715406  | 5,498468164 | 2,8146249 | 0,163423343 |
| 4787 | ENSG00000147475 | 0,193330213  | 5,427481847 | 2,0197954 | 0,168570822 |
| 4788 | ENSG00000147485 | 0,175565561  | 6,591482936 | 0,3609464 | 0,553827624 |
| 4789 | ENSG00000147526 | -0,129163085 | 7,69177699  | 0,4654286 | 0,501878247 |
| 4790 | ENSG00000147535 | 0,155934813  | 3,994851808 | 0,858418  | 0,363755942 |
| 4791 | ENSG00000147548 | 0,176114043  | 6,291856796 | 1,8352945 | 0,188553553 |
| 4792 | ENSG00000147573 | -0,206059423 | 6,462189856 | 0,5156537 | 0,479897883 |
| 4793 | ENSG00000147592 | -0,235893322 | 3,796996741 | 1,2997684 | 0,26593258  |
| 4794 | ENSG00000147601 | 0,031589903  | 4,704913013 | 0,0795631 | 0,784657663 |
| 4795 | ENSG00000147604 | -0,016847744 | 9,206885098 | 0,0033579 | 0,954288873 |
| 4796 | ENSG00000147649 | 0,064462874  | 6,746839278 | 0,286038  | 0,597861185 |
| 4797 | ENSG00000147650 | -0,212663441 | 5,010611986 | 2,5338818 | 0,124968779 |
| 4798 | ENSG00000147654 | -0,192325925 | 4,471282036 | 1,6119197 | 0,24254939  |
| 4799 | ENSG00000147669 | -0,351883973 | 5,139568597 | 2,274732  | 0,145046585 |
| 4800 | ENSG00000147677 | -0,033943684 | 6,952853939 | 0,0856556 | 0,772376788 |
| 4801 | ENSG00000147679 | -0,031698253 | 4,411174525 | 0,0650454 | 0,93029187  |
| 4802 | ENSG00000147684 | -0,64877475  | 7,074290226 | 14,244884 | 0,000977441 |
| 4803 | ENSG00000147687 | -0,213841655 | 4,328567134 | 1,2731895 | 0,270745886 |
| 4804 | ENSG00000147789 | -0,045090738 | 4,087489357 | 0,1428595 | 0,757093783 |
| 4805 | ENSG00000147852 | -0,299626502 | 6,696999561 | 2,7643507 | 0,109889476 |
| 4806 | ENSG00000147853 | -0,242887893 | 6,931918196 | 1,8828216 | 0,183185493 |
| 4807 | ENSG00000147854 | 0,018665762  | 5,415546906 | 0,0265692 | 0,871929814 |
| 4808 | ENSG00000147862 | 0,034540832  | 8,014848595 | 0,0923523 | 0,763917251 |
| 4809 | ENSG00000147872 | -0,335297005 | 5,930223301 | 0,8350284 | 0,37025719  |
| 4810 | ENSG00000147874 | 0,024121975  | 4,719871471 | 0,0358379 | 0,851497395 |
| 4811 | ENSG00000147894 | -0,37482698  | 5,248378456 | 2,2040658 | 0,151158714 |
| 4812 | ENSG00000147905 | 0,188192922  | 4,784754137 | 1,1936945 | 0,285843261 |
| 4813 | ENSG00000147996 | -0,233824963 | 5,965582711 | 3,803353  | 0,063337154 |
| 4814 | ENSG00000148019 | 0,230816233  | 4,037237344 | 3,0357425 | 0,163287739 |
| 4815 | ENSG00000148053 | 0,005311583  | 6,088910672 | 0,0004845 | 0,982627821 |
| 4816 | ENSG00000148090 | -0,138465248 | 4,709852099 | 1,0344853 | 0,319603782 |
| 4817 | ENSG00000148110 | 0,115429544  | 5,103380674 | 0,833783  | 0,370575448 |
| 4818 | ENSG00000148120 | -0,228060769 | 6,594092004 | 1,5619502 | 0,223887443 |
| 4819 | ENSG00000148143 | 0,2039092    | 5,548064674 | 1,1163009 | 0,301635257 |
| 4820 | ENSG00000148153 | 0,020615541  | 4,400865169 | 0,0349778 | 0,887192054 |
| 4821 | ENSG00000148154 | -0,534837832 | 5,485901429 | 2,9620016 | 0,098603464 |
| 4822 | ENSG00000148158 | 0,388546248  | 4,43319188  | 4,3561746 | 0,048092165 |
| 4823 | ENSG00000148175 | -0,345114607 | 7,605565492 | 7,7775504 | 0,010385093 |
| 4824 | ENSG00000148180 | 0,453739946  | 10,4836083  | 2,1444886 | 0,156552844 |
| 4825 | ENSG00000148187 | -0,174828115 | 5,013305021 | 3,0756863 | 0,114906926 |
| 4826 | ENSG00000148218 | 0,222525453  | 5,254067065 | 1,2777938 | 0,269903956 |
| 4827 | ENSG00000148229 | -0,229037777 | 4,420879394 | 3,5664987 | 0,1340446   |
| 4828 | ENSG00000148248 | 0,143685967  | 6,40037109  | 1,1736323 | 0,289790109 |
| 4829 | ENSG00000148290 | -0,3815601   | 4,561966929 | 4,8609702 | 0,037690826 |
| 4830 | ENSG00000148296 | 0,066064309  | 4,14821255  | 0,1514598 | 0,742409496 |
| 4831 | ENSG00000148297 | 0,107134596  | 4,002003633 | 0,4538168 | 0,60760291  |
| 4832 | ENSG00000148303 | 0,286848671  | 8,752343871 | 2,1187574 | 0,15892637  |
| 4833 | ENSG00000148308 | -0,287193222 | 4,395040143 | 2,4598417 | 0,130380756 |
| 4834 | ENSG00000148334 | -0,434212387 | 5,393157605 | 3,5279026 | 0,073017187 |
| 4835 | ENSG00000148337 | 0,11025272   | 4,835310666 | 0,4360845 | 0,515546434 |
| 4836 | ENSG00000148339 | -0,316648938 | 4,180224797 | 1,5581412 | 0,224435039 |

|      |                 |              |             |           |             |
|------|-----------------|--------------|-------------|-----------|-------------|
| 4837 | ENSG00000148341 | 0,136643466  | 4,474107827 | 0,6893711 | 0,414872697 |
| 4838 | ENSG00000148343 | -0,105850715 | 4,602465184 | 0,3081678 | 0,58413994  |
| 4839 | ENSG00000148358 | 0,24300414   | 5,875156589 | 2,6650446 | 0,116121759 |
| 4840 | ENSG00000148396 | 0,243344716  | 5,352020035 | 1,0347963 | 0,319565625 |
| 4841 | ENSG00000148399 | 0,110542706  | 3,996579551 | 0,4028007 | 0,570958476 |
| 4842 | ENSG00000148400 | 0,399257453  | 4,313035325 | 2,4494454 | 0,131156305 |
| 4843 | ENSG00000148411 | -0,137433308 | 5,010515986 | 0,8538942 | 0,364995193 |
| 4844 | ENSG00000148429 | 0,147889932  | 4,543250674 | 2,4929201 | 0,254847912 |
| 4845 | ENSG00000148444 | -0,376472445 | 4,051281919 | 3,4689184 | 0,07529251  |
| 4846 | ENSG00000148450 | -0,25677435  | 5,826400693 | 2,1856644 | 0,152800618 |
| 4847 | ENSG00000148468 | -0,068725477 | 3,878740718 | 0,0932194 | 0,762856338 |
| 4848 | ENSG00000148481 | 0,122869899  | 5,276529656 | 0,3962809 | 0,535189871 |
| 4849 | ENSG00000148484 | -0,126445893 | 5,592067562 | 0,9685366 | 0,335200871 |
| 4850 | ENSG00000148488 | 0,399884194  | 4,131754755 | 4,6326898 | 0,042043342 |
| 4851 | ENSG00000148498 | 0,034229273  | 5,702523055 | 0,1706078 | 0,709761759 |
| 4852 | ENSG00000148516 | -0,059282548 | 7,124279822 | 0,1072373 | 0,746259258 |
| 4853 | ENSG00000148572 | 0,015707067  | 3,920387295 | 0,0099929 | 0,921234386 |
| 4854 | ENSG00000148606 | -0,021610014 | 4,444509781 | 0,0269845 | 0,870942136 |
| 4855 | ENSG00000148634 | 0,097335652  | 6,566121398 | 0,34723   | 0,561401454 |
| 4856 | ENSG00000148655 | -1,070668923 | 4,946920219 | 30,684806 | 1,21572E-05 |
| 4857 | ENSG00000148660 | 0,099067587  | 4,195611674 | 0,4235669 | 0,570380909 |
| 4858 | ENSG00000148672 | 0,048144509  | 6,746059545 | 0,2740538 | 0,605591598 |
| 4859 | ENSG00000148677 | 0,203392916  | 12,12992938 | 0,2081107 | 0,652509972 |
| 4860 | ENSG00000148688 | -0,239512256 | 4,514027087 | 2,3994465 | 0,134963387 |
| 4861 | ENSG00000148690 | -0,202499324 | 5,010896715 | 1,2411291 | 0,276705056 |
| 4862 | ENSG00000148700 | -0,17149328  | 7,474015851 | 1,0966283 | 0,305835468 |
| 4863 | ENSG00000148719 | 0,007266286  | 4,837978628 | 0,0029445 | 0,957190351 |
| 4864 | ENSG00000148730 | -0,370242841 | 7,879368524 | 6,1317699 | 0,020997731 |
| 4865 | ENSG00000148737 | 0,30735348   | 4,095786448 | 2,5679062 | 0,122631936 |
| 4866 | ENSG00000148834 | -0,053109185 | 6,491698112 | 0,11063   | 0,742425981 |
| 4867 | ENSG00000148840 | -0,359543697 | 4,410843621 | 1,9887976 | 0,171783267 |
| 4868 | ENSG00000148841 | 0,033941899  | 5,493219305 | 0,0164566 | 0,899034374 |
| 4869 | ENSG00000148842 | 0,396939262  | 3,981271627 | 5,7723024 | 0,024703002 |
| 4870 | ENSG00000148843 | -0,082933458 | 4,784650363 | 0,2754891 | 0,604671785 |
| 4871 | ENSG00000148925 | -0,043886622 | 5,134549343 | 0,0670831 | 0,797924943 |
| 4872 | ENSG00000148926 | 0,932309014  | 4,502616336 | 11,572018 | 0,002436092 |
| 4873 | ENSG00000148943 | 0,153552141  | 5,808133258 | 0,6383255 | 0,432451798 |
| 4874 | ENSG00000149084 | -0,279407554 | 6,166510521 | 2,1473036 | 0,15629282  |
| 4875 | ENSG00000149089 | -0,459153536 | 4,429656058 | 7,8748694 | 0,009997534 |
| 4876 | ENSG00000149090 | 0,090187806  | 3,835663728 | 0,1368074 | 0,714843285 |
| 4877 | ENSG00000149091 | 0,17349807   | 5,644470315 | 0,8258605 | 0,372851402 |
| 4878 | ENSG00000149100 | -0,158769572 | 6,453922136 | 0,8238063 | 0,373436283 |
| 4879 | ENSG00000149115 | 0,1252763    | 5,331127551 | 0,2326072 | 0,634133338 |
| 4880 | ENSG00000149131 | 0,252863137  | 7,482624177 | 0,9032675 | 0,351740271 |
| 4881 | ENSG00000149136 | 0,058299874  | 5,260299607 | 0,1452148 | 0,706631167 |
| 4882 | ENSG00000149177 | 0,335541453  | 4,543806786 | 2,1568849 | 0,155411671 |
| 4883 | ENSG00000149182 | 0,197124659  | 5,68646232  | 1,7563675 | 0,19803056  |
| 4884 | ENSG00000149187 | 0,14600094   | 6,443185351 | 0,8688457 | 0,360910436 |
| 4885 | ENSG00000149196 | -0,37897576  | 4,846644781 | 4,4279227 | 0,046433413 |
| 4886 | ENSG00000149212 | 0,949246386  | 6,578638043 | 4,867917  | 0,037566554 |
| 4887 | ENSG00000149218 | 0,248202788  | 5,395475516 | 2,649385  | 0,117146882 |
| 4888 | ENSG00000149231 | -0,163853189 | 5,509116754 | 1,254312  | 0,27423045  |
| 4889 | ENSG00000149257 | -0,080242345 | 5,893184491 | 0,0956611 | 0,759871023 |
| 4890 | ENSG00000149262 | -0,119670915 | 4,501356972 | 1,4118995 | 0,35933769  |
| 4891 | ENSG00000149269 | 0,100521755  | 4,224182455 | 0,3028829 | 0,587360825 |
| 4892 | ENSG00000149273 | 0,261493214  | 8,150963902 | 1,6076547 | 0,217446249 |
| 4893 | ENSG00000149289 | -0,102819062 | 5,536625016 | 0,8311911 | 0,371307257 |
| 4894 | ENSG00000149292 | 0,180410463  | 3,618131766 | 0,9860512 | 0,340249994 |
| 4895 | ENSG00000149294 | -0,003119273 | 7,487735486 | 0,0001898 | 0,989125153 |

|      |                 |              |             |           |             |
|------|-----------------|--------------|-------------|-----------|-------------|
| 4896 | ENSG00000149308 | -0,041771592 | 5,202258744 | 0,0784662 | 0,781878586 |
| 4897 | ENSG00000149311 | 0,066046128  | 7,491291964 | 0,1574213 | 0,695181616 |
| 4898 | ENSG00000149313 | -0,127929526 | 5,178677772 | 0,5032755 | 0,485160064 |
| 4899 | ENSG00000149346 | 0,217951602  | 3,564161645 | 1,7842603 | 0,257937963 |
| 4900 | ENSG00000149357 | -0,084655639 | 5,323875689 | 0,2352255 | 0,632241151 |
| 4901 | ENSG00000149428 | -0,25395487  | 5,921972677 | 1,2038613 | 0,283851364 |
| 4902 | ENSG00000149474 | 0,147618306  | 3,86286092  | 1,7124268 | 0,421908696 |
| 4903 | ENSG00000149480 | -0,011367542 | 5,040598098 | 0,0044076 | 0,94763837  |
| 4904 | ENSG00000149483 | -0,072022189 | 3,849452812 | 0,3168892 | 0,665599018 |
| 4905 | ENSG00000149485 | -0,274022379 | 5,732963833 | 2,2665987 | 0,145734804 |
| 4906 | ENSG00000149499 | 0,143050503  | 4,156227234 | 0,3549732 | 0,55710131  |
| 4907 | ENSG00000149532 | 0,105063293  | 5,308355608 | 0,39287   | 0,536937248 |
| 4908 | ENSG00000149547 | -0,35807108  | 5,979519196 | 8,8779395 | 0,006665367 |
| 4909 | ENSG00000149557 | -0,055132239 | 5,012914834 | 0,092844  | 0,763319099 |
| 4910 | ENSG00000149564 | -0,328279732 | 5,138733292 | 3,5498709 | 0,072189957 |
| 4911 | ENSG00000149573 | -0,217104217 | 3,868694034 | 0,8359177 | 0,370006944 |
| 4912 | ENSG00000149577 | 0,037478068  | 4,94821349  | 0,020173  | 0,888285764 |
| 4913 | ENSG00000149591 | -0,341283749 | 7,489294907 | 1,1819012 | 0,288177153 |
| 4914 | ENSG00000149596 | -0,252506767 | 6,298652171 | 0,7535216 | 0,394287581 |
| 4915 | ENSG00000149600 | -0,375871719 | 4,034922952 | 6,0471321 | 0,02931859  |
| 4916 | ENSG00000149639 | 0,098385737  | 4,987407867 | 0,0985274 | 0,756419539 |
| 4917 | ENSG00000149657 | -0,016119238 | 4,556038975 | 0,0127176 | 0,911181945 |
| 4918 | ENSG00000149658 | 0,037450355  | 4,614315681 | 0,0766786 | 0,857133013 |
| 4919 | ENSG00000149743 | -0,393308375 | 4,235418867 | 4,3987715 | 0,047099448 |
| 4920 | ENSG00000149792 | 0,112088429  | 4,581721977 | 0,6683133 | 0,495538137 |
| 4921 | ENSG00000149806 | 0,283094923  | 6,700993993 | 2,0819462 | 0,162466625 |
| 4922 | ENSG00000149809 | 0,658276062  | 4,665720667 | 7,1929966 | 0,013279057 |
| 4923 | ENSG00000149823 | 0,333936469  | 4,731609214 | 2,9308001 | 0,100292001 |
| 4924 | ENSG00000149930 | 0,21759136   | 5,143253814 | 1,7581962 | 0,19780553  |
| 4925 | ENSG00000149932 | 0,118557877  | 5,060430949 | 0,4522831 | 0,507921016 |
| 4926 | ENSG00000150054 | 0,146938632  | 4,404050451 | 0,8203087 | 0,374435223 |
| 4927 | ENSG00000150093 | -0,143146366 | 9,459381819 | 0,517914  | 0,478922427 |
| 4928 | ENSG00000150316 | -0,457496876 | 5,646787752 | 5,1414118 | 0,033020681 |
| 4929 | ENSG00000150347 | 0,200482713  | 6,854602004 | 0,3965202 | 0,535067673 |
| 4930 | ENSG00000150401 | 0,174336198  | 5,801369501 | 0,4104234 | 0,528055889 |
| 4931 | ENSG00000150403 | 0,545336251  | 5,139032169 | 26,887747 | 2,87648E-05 |
| 4932 | ENSG00000150457 | 0,221921787  | 4,857649577 | 1,7824309 | 0,194852945 |
| 4933 | ENSG00000150459 | -0,138544438 | 6,570115378 | 0,8617876 | 0,362819456 |
| 4934 | ENSG00000150471 | 0,143879053  | 4,244029138 | 1,2474073 | 0,348737699 |
| 4935 | ENSG00000150477 | 0,205214833  | 4,005441723 | 3,2231355 | 0,234858656 |
| 4936 | ENSG00000150527 | -0,045067693 | 5,507206077 | 0,1134911 | 0,73923337  |
| 4937 | ENSG00000150540 | 0,594736068  | 5,173994372 | 2,7071787 | 0,113430603 |
| 4938 | ENSG00000150593 | 0,430627211  | 5,669520297 | 4,2974957 | 0,0494986   |
| 4939 | ENSG00000150672 | -0,161432685 | 4,467355484 | 1,0159868 | 0,323909389 |
| 4940 | ENSG00000150687 | 0,863559181  | 5,392766191 | 8,7841701 | 0,006933039 |
| 4941 | ENSG00000150712 | 0,252181191  | 4,934955181 | 4,1358473 | 0,053578384 |
| 4942 | ENSG00000150722 | -0,353923021 | 3,890916551 | 0,8042542 | 0,379070875 |
| 4943 | ENSG00000150753 | -0,374516058 | 6,181263702 | 5,6303113 | 0,02634798  |
| 4944 | ENSG00000150756 | -0,278778284 | 3,937310475 | 4,0827357 | 0,119540677 |
| 4945 | ENSG00000150760 | 0,371351062  | 6,027883682 | 9,05406   | 0,006219914 |
| 4946 | ENSG00000150764 | 0,380178124  | 6,275058291 | 7,4728256 | 0,011784939 |
| 4947 | ENSG00000150768 | -0,512965815 | 6,70095785  | 4,7878262 | 0,039027714 |
| 4948 | ENSG00000150776 | -0,282811847 | 4,942102729 | 3,5015523 | 0,074023774 |
| 4949 | ENSG00000150779 | -0,412237583 | 5,320806733 | 3,9251489 | 0,059587856 |
| 4950 | ENSG00000150787 | -0,25194029  | 4,096159428 | 1,4826295 | 0,235649227 |
| 4951 | ENSG00000150867 | 0,317745417  | 5,050220444 | 2,1392257 | 0,157040382 |
| 4952 | ENSG00000150907 | 0,043624959  | 5,570262749 | 0,0401727 | 0,842896425 |
| 4953 | ENSG00000150938 | 1,076574444  | 6,833773762 | 6,6538149 | 0,016723869 |
| 4954 | ENSG00000150961 | 0,159916692  | 5,345564505 | 0,6044821 | 0,444758722 |

|      |                 |              |             |           |             |
|------|-----------------|--------------|-------------|-----------|-------------|
| 4955 | ENSG00000150991 | -0,255085434 | 11,5289559  | 1,1734469 | 0,289827282 |
| 4956 | ENSG00000150995 | 0,054533298  | 6,469336908 | 0,0918863 | 0,764504343 |
| 4957 | ENSG00000151065 | -0,223874716 | 4,256622491 | 0,4516653 | 0,508208177 |
| 4958 | ENSG00000151067 | -0,138615412 | 6,67380692  | 0,2068803 | 0,653467069 |
| 4959 | ENSG00000151090 | 0,202010365  | 4,635694229 | 1,7082603 | 0,20406604  |
| 4960 | ENSG00000151092 | -0,306723452 | 5,235920543 | 5,3195528 | 0,030358051 |
| 4961 | ENSG00000151093 | -0,416098586 | 3,708108347 | 5,2810857 | 0,033199278 |
| 4962 | ENSG00000151116 | -0,243401461 | 4,714318032 | 2,0663098 | 0,163987035 |
| 4963 | ENSG00000151131 | 0,149689962  | 4,982846933 | 0,9534186 | 0,338960545 |
| 4964 | ENSG00000151135 | 0,186044791  | 6,029388795 | 1,1489116 | 0,294842197 |
| 4965 | ENSG00000151148 | -0,052161977 | 5,78681429  | 0,0790495 | 0,781091324 |
| 4966 | ENSG00000151150 | -0,478701675 | 8,075410964 | 5,8736219 | 0,02359919  |
| 4967 | ENSG00000151151 | -0,035955118 | 3,769496636 | 0,02666   | 0,871718129 |
| 4968 | ENSG00000151176 | -0,075949109 | 4,914852274 | 0,118907  | 0,733341101 |
| 4969 | ENSG00000151208 | 0,405950776  | 3,845651845 | 1,9140364 | 0,179733529 |
| 4970 | ENSG00000151229 | 0,024107537  | 5,008779519 | 0,0150357 | 0,903467872 |
| 4971 | ENSG00000151233 | 0,234802083  | 4,614809776 | 2,0831251 | 0,162352689 |
| 4972 | ENSG00000151239 | -0,046956877 | 5,445706587 | 0,0271867 | 0,870468925 |
| 4973 | ENSG00000151240 | -0,030438885 | 5,422873892 | 0,0270188 | 0,870865887 |
| 4974 | ENSG00000151247 | -0,202632658 | 5,870041436 | 0,7073513 | 0,408941842 |
| 4975 | ENSG00000151276 | 0,188500408  | 5,867558979 | 1,4938966 | 0,23393154  |
| 4976 | ENSG00000151292 | 0,369732645  | 5,625725253 | 2,4017208 | 0,134787395 |
| 4977 | ENSG00000151304 | -0,033090146 | 4,149002016 | 0,077019  | 0,883390286 |
| 4978 | ENSG00000151320 | 0,051504032  | 8,246083803 | 0,0258061 | 0,873770593 |
| 4979 | ENSG00000151327 | 0,336736675  | 5,714065885 | 3,6694    | 0,067872544 |
| 4980 | ENSG00000151332 | 0,122775523  | 3,824715546 | 0,7826678 | 0,441505991 |
| 4981 | ENSG00000151338 | -0,1565472   | 4,855997812 | 0,6589199 | 0,425222883 |
| 4982 | ENSG00000151348 | 0,07244145   | 5,867491998 | 0,4387696 | 0,514245668 |
| 4983 | ENSG00000151353 | 0,210631982  | 4,029799729 | 2,4227652 | 0,209690325 |
| 4984 | ENSG00000151366 | -0,429355576 | 4,89097954  | 7,7968341 | 0,01032327  |
| 4985 | ENSG00000151376 | -0,20797532  | 4,685614976 | 2,1301088 | 0,157854435 |
| 4986 | ENSG00000151413 | -0,006267752 | 4,80616948  | 0,0011544 | 0,973188203 |
| 4987 | ENSG00000151414 | -0,293708019 | 8,49401076  | 0,7127205 | 0,40719579  |
| 4988 | ENSG00000151422 | 0,100388366  | 6,205109086 | 0,2792619 | 0,60222337  |
| 4989 | ENSG00000151445 | 0,08925506   | 4,24243612  | 0,695848  | 0,551313564 |
| 4990 | ENSG00000151458 | 0,730422586  | 5,678528849 | 6,9142006 | 0,014950394 |
| 4991 | ENSG00000151461 | 0,00073316   | 5,53187475  | 4,106E-05 | 0,994942191 |
| 4992 | ENSG00000151465 | -0,305676503 | 5,304437514 | 2,9624223 | 0,098580922 |
| 4993 | ENSG00000151466 | 0,171930892  | 5,026146399 | 0,6028624 | 0,445361629 |
| 4994 | ENSG00000151468 | 0,418389491  | 4,474446028 | 1,9444286 | 0,176448584 |
| 4995 | ENSG00000151474 | -0,012518972 | 4,632787391 | 0,0021597 | 0,963332396 |
| 4996 | ENSG00000151491 | 0,09782667   | 6,591034907 | 0,3426774 | 0,563960202 |
| 4997 | ENSG00000151498 | 0,163710607  | 4,890737556 | 1,0256144 | 0,321675959 |
| 4998 | ENSG00000151500 | -0,225895955 | 4,869305104 | 1,7098783 | 0,203859371 |
| 4999 | ENSG00000151502 | 0,051002481  | 4,925526687 | 0,1385    | 0,796101943 |
| 5000 | ENSG00000151503 | 0,138091688  | 3,922092096 | 0,7472301 | 0,454066006 |
| 5001 | ENSG00000151532 | -0,109436668 | 4,65556855  | 1,4536101 | 0,376465484 |
| 5002 | ENSG00000151552 | 0,013300958  | 4,506409508 | 0,0133869 | 0,939972183 |
| 5003 | ENSG00000151553 | 0,178643639  | 5,716157463 | 1,3528542 | 0,256647997 |
| 5004 | ENSG00000151576 | 0,137211916  | 3,848874842 | 0,6387615 | 0,442529874 |
| 5005 | ENSG00000151612 | 0,214293558  | 4,682046465 | 1,4833415 | 0,23554022  |
| 5006 | ENSG00000151617 | 0,300429504  | 5,853170396 | 1,756218  | 0,198048966 |
| 5007 | ENSG00000151623 | -0,171537544 | 5,625872904 | 1,6993178 | 0,20516865  |
| 5008 | ENSG00000151632 | 0,133095538  | 6,054797571 | 0,0751917 | 0,786358287 |
| 5009 | ENSG00000151657 | -0,20729941  | 3,932984486 | 3,7170259 | 0,237418419 |
| 5010 | ENSG00000151665 | -0,096716313 | 3,525272835 | 0,4086095 | 0,66114282  |
| 5011 | ENSG00000151687 | 0,293125828  | 4,461483299 | 3,7439287 | 0,065321576 |
| 5012 | ENSG00000151689 | -0,22837356  | 4,710904962 | 2,5598667 | 0,123153344 |
| 5013 | ENSG00000151690 | -0,361184172 | 5,098100193 | 4,6261712 | 0,042175674 |

|      |                 |              |             |           |             |
|------|-----------------|--------------|-------------|-----------|-------------|
| 5014 | ENSG00000151692 | -0,043479677 | 4,350578402 | 0,0460823 | 0,831909022 |
| 5015 | ENSG00000151693 | 0,273367874  | 4,479542633 | 1,1603817 | 0,29250171  |
| 5016 | ENSG00000151694 | 0,047432013  | 5,189576946 | 0,0849336 | 0,773319137 |
| 5017 | ENSG00000151702 | -0,065235827 | 4,878159626 | 0,2197727 | 0,643594123 |
| 5018 | ENSG00000151718 | 0,100965022  | 5,72773537  | 0,4316612 | 0,517664324 |
| 5019 | ENSG00000151726 | -0,060660651 | 8,364540239 | 0,0242033 | 0,877719557 |
| 5020 | ENSG00000151729 | -0,612600304 | 9,933287192 | 6,3234742 | 0,019303133 |
| 5021 | ENSG00000151746 | 0,468632662  | 4,324696461 | 7,5130797 | 0,011610313 |
| 5022 | ENSG00000151748 | 0,02917141   | 5,164236376 | 0,0597565 | 0,80903079  |
| 5023 | ENSG00000151779 | -0,081353991 | 6,986403746 | 0,3684293 | 0,549758009 |
| 5024 | ENSG00000151789 | -0,657705406 | 4,041971388 | 5,5614321 | 0,027189676 |
| 5025 | ENSG00000151806 | -0,155343933 | 5,174149671 | 1,328795  | 0,260765872 |
| 5026 | ENSG00000151835 | 0,101009237  | 7,292502173 | 0,1792034 | 0,675971875 |
| 5027 | ENSG00000151849 | -0,04942093  | 3,760928234 | 0,1263576 | 0,811042515 |
| 5028 | ENSG00000151883 | 0,343234418  | 5,045120412 | 3,5288561 | 0,072981057 |
| 5029 | ENSG00000151892 | -0,44853528  | 5,437833367 | 2,1249943 | 0,158367907 |
| 5030 | ENSG00000151893 | 0,223296853  | 5,917173105 | 3,7722991 | 0,064347424 |
| 5031 | ENSG00000151914 | 0,07676191   | 10,77699666 | 0,1227615 | 0,729220543 |
| 5032 | ENSG00000151923 | -0,091478524 | 5,918548396 | 0,5961319 | 0,447853874 |
| 5033 | ENSG00000151929 | -0,237205896 | 6,275394024 | 1,0524324 | 0,315565132 |
| 5034 | ENSG00000151967 | -0,244868465 | 4,390219609 | 0,803298  | 0,379349596 |
| 5035 | ENSG00000152061 | -0,082138248 | 8,453950072 | 0,0962568 | 0,759149025 |
| 5036 | ENSG00000152078 | -0,161952205 | 6,183622791 | 0,5348632 | 0,471919626 |
| 5037 | ENSG00000152102 | 0,08607043   | 6,49647626  | 0,4896903 | 0,491025077 |
| 5038 | ENSG00000152104 | 0,790530139  | 5,788551489 | 7,0997059 | 0,013814112 |
| 5039 | ENSG00000152117 | 0,037322549  | 4,213959338 | 0,0318037 | 0,860013068 |
| 5040 | ENSG00000152127 | -0,093279095 | 7,281290014 | 0,1681285 | 0,685556247 |
| 5041 | ENSG00000152133 | 0,037415514  | 4,171670908 | 0,0459181 | 0,832204051 |
| 5042 | ENSG00000152137 | -0,17928808  | 7,878338545 | 0,9584581 | 0,337712612 |
| 5043 | ENSG00000152193 | -0,245880134 | 3,853539714 | 1,4102063 | 0,247083422 |
| 5044 | ENSG00000152217 | 0,544636441  | 4,846640495 | 2,8929519 | 0,102385561 |
| 5045 | ENSG00000152219 | -0,177101037 | 5,307196679 | 0,7611814 | 0,391932727 |
| 5046 | ENSG00000152223 | -0,15314182  | 6,368611359 | 0,8527875 | 0,365305833 |
| 5047 | ENSG00000152234 | -0,413860939 | 10,11720619 | 3,1133359 | 0,090831145 |
| 5048 | ENSG00000152242 | -0,261026748 | 5,96295566  | 2,1699485 | 0,154219878 |
| 5049 | ENSG00000152256 | -0,095962739 | 5,730629592 | 0,249056  | 0,62245746  |
| 5050 | ENSG00000152270 | 0,313616352  | 5,977249101 | 0,8490003 | 0,366353682 |
| 5051 | ENSG00000152291 | 0,092560418  | 7,061112697 | 0,3857767 | 0,5405937   |
| 5052 | ENSG00000152332 | 0,218084351  | 6,734238446 | 1,3346548 | 0,259782869 |
| 5053 | ENSG00000152377 | -0,481363329 | 6,726011498 | 4,1774812 | 0,052522382 |
| 5054 | ENSG00000152382 | -0,332507024 | 3,964490161 | 6,8060979 | 0,055765282 |
| 5055 | ENSG00000152402 | -0,201487074 | 6,041519835 | 0,6610488 | 0,424486378 |
| 5056 | ENSG00000152404 | -0,032772402 | 5,067327768 | 0,0505948 | 0,824007729 |
| 5057 | ENSG00000152409 | 0,250971622  | 5,683002515 | 1,6605252 | 0,210282466 |
| 5058 | ENSG00000152413 | 0,167342802  | 6,23985243  | 0,1408478 | 0,710861684 |
| 5059 | ENSG00000152443 | 0,020369773  | 4,540235414 | 0,0365927 | 0,883212717 |
| 5060 | ENSG00000152454 | -0,069040066 | 3,657616316 | 0,2530815 | 0,689123199 |
| 5061 | ENSG00000152457 | 0,145868434  | 4,019602593 | 1,2544462 | 0,372535148 |
| 5062 | ENSG00000152465 | 0,10300609   | 4,408039782 | 0,7909764 | 0,416861275 |
| 5063 | ENSG00000152484 | 0,435343842  | 5,48911319  | 3,5737579 | 0,071302625 |
| 5064 | ENSG00000152492 | 0,233136025  | 6,792020101 | 2,3841818 | 0,136132584 |
| 5065 | ENSG00000152518 | 0,338861356  | 4,917651948 | 1,7222942 | 0,202282065 |
| 5066 | ENSG00000152520 | 0,137955459  | 5,351216351 | 0,9886312 | 0,330346181 |
| 5067 | ENSG00000152527 | 0,628519761  | 4,675148669 | 4,6266799 | 0,04216533  |
| 5068 | ENSG00000152556 | -0,175849837 | 7,944196268 | 0,6900565 | 0,414644205 |
| 5069 | ENSG00000152558 | 0,089159443  | 6,759597545 | 0,2455645 | 0,624894615 |
| 5070 | ENSG00000152580 | 0,496512288  | 5,46820874  | 1,5110271 | 0,231350352 |
| 5071 | ENSG00000152582 | 0,38759394   | 3,512365551 | 4,4434158 | 0,057784011 |
| 5072 | ENSG00000152583 | -0,737120845 | 9,899873294 | 11,663371 | 0,002349797 |

|      |                 |              |             |           |             |
|------|-----------------|--------------|-------------|-----------|-------------|
| 5073 | ENSG00000152601 | -0,109473268 | 8,06988707  | 0,504482  | 0,484618218 |
| 5074 | ENSG00000152620 | -0,284113888 | 5,370053911 | 4,5495082 | 0,043728781 |
| 5075 | ENSG00000152642 | -0,273003044 | 8,181850387 | 0,9775532 | 0,33304192  |
| 5076 | ENSG00000152661 | -0,185633036 | 8,055382084 | 0,4305997 | 0,518174881 |
| 5077 | ENSG00000152683 | -0,118286963 | 5,049085967 | 0,7713383 | 0,388813954 |
| 5078 | ENSG00000152684 | -0,131928615 | 4,619366892 | 1,2343802 | 0,366432651 |
| 5079 | ENSG00000152689 | -0,240810897 | 6,057578587 | 1,0144807 | 0,324260709 |
| 5080 | ENSG00000152700 | -0,19089908  | 6,516004905 | 2,0832416 | 0,162295008 |
| 5081 | ENSG00000152749 | 0,027092281  | 4,61969615  | 0,0231045 | 0,880504662 |
| 5082 | ENSG00000152763 | 0,430826477  | 3,732668586 | 3,2146094 | 0,086082098 |
| 5083 | ENSG00000152767 | -0,037935542 | 4,886224351 | 0,0369228 | 0,849300591 |
| 5084 | ENSG00000152778 | -0,063432245 | 5,104317447 | 0,0879812 | 0,769408639 |
| 5085 | ENSG00000152779 | 0,541554678  | 3,993703599 | 8,3088603 | 0,008380699 |
| 5086 | ENSG00000152782 | -0,074610882 | 3,888291289 | 0,102362  | 0,751887563 |
| 5087 | ENSG00000152795 | -0,009237717 | 7,288811494 | 0,0046679 | 0,946114691 |
| 5088 | ENSG00000152818 | 0,037821226  | 8,343749977 | 0,0792492 | 0,78081381  |
| 5089 | ENSG00000152894 | -0,180760671 | 6,127712489 | 2,3108534 | 0,141989546 |
| 5090 | ENSG00000152904 | -0,23839588  | 4,048389667 | 1,8481037 | 0,195843332 |
| 5091 | ENSG00000152926 | 0,1228778    | 5,460032494 | 0,164737  | 0,688565248 |
| 5092 | ENSG00000152942 | -0,190904065 | 4,983801117 | 1,3461401 | 0,257798768 |
| 5093 | ENSG00000152944 | -0,215505452 | 5,603046581 | 1,347648  | 0,257539743 |
| 5094 | ENSG00000152952 | 0,13933725   | 6,347888921 | 0,1729107 | 0,681373343 |
| 5095 | ENSG00000152990 | 0,193498481  | 5,681522994 | 3,188704  | 0,087231938 |
| 5096 | ENSG00000153006 | 0,093504765  | 4,959128224 | 0,2884626 | 0,596340599 |
| 5097 | ENSG00000153015 | -0,145175068 | 4,780227685 | 1,2235022 | 0,330480647 |
| 5098 | ENSG00000153029 | 0,467068371  | 4,306228702 | 9,2320546 | 0,005817422 |
| 5099 | ENSG00000153037 | -0,204565652 | 4,097868856 | 2,5187889 | 0,212049326 |
| 5100 | ENSG00000153046 | 0,023300316  | 4,538091337 | 0,0494686 | 0,896221984 |
| 5101 | ENSG00000153048 | -0,015500946 | 4,048309457 | 0,0035691 | 0,952874822 |
| 5102 | ENSG00000153066 | -0,137747296 | 4,551260229 | 1,4888647 | 0,303077887 |
| 5103 | ENSG00000153071 | -0,115903544 | 6,306201197 | 0,2056109 | 0,654458172 |
| 5104 | ENSG00000153094 | 0,564682753  | 3,652426824 | 11,455889 | 0,004007651 |
| 5105 | ENSG00000153107 | 0,049704529  | 5,714190542 | 0,2838772 | 0,599239364 |
| 5106 | ENSG00000153113 | -0,488231929 | 9,011780734 | 5,1562755 | 0,0327919   |
| 5107 | ENSG00000153130 | -0,386532467 | 6,469966648 | 1,6749117 | 0,208384404 |
| 5108 | ENSG00000153132 | -0,766660414 | 6,940935934 | 3,2321999 | 0,085280918 |
| 5109 | ENSG00000153140 | -0,169189651 | 4,201928582 | 0,6414266 | 0,431351022 |
| 5110 | ENSG00000153147 | 0,14417244   | 6,987390451 | 1,0775823 | 0,309940554 |
| 5111 | ENSG00000153165 | -0,014342648 | 5,812951823 | 0,0091933 | 0,924441191 |
| 5112 | ENSG00000153179 | 0,052792417  | 6,474903877 | 0,1204749 | 0,731657295 |
| 5113 | ENSG00000153187 | 0,050947872  | 8,427961265 | 0,1345357 | 0,717099883 |
| 5114 | ENSG00000153201 | -0,122841481 | 8,485611847 | 0,5200749 | 0,47801663  |
| 5115 | ENSG00000153207 | 0,019137662  | 6,307524844 | 0,0263761 | 0,872391693 |
| 5116 | ENSG00000153208 | -0,421795282 | 4,226749743 | 2,1943978 | 0,152018714 |
| 5117 | ENSG00000153214 | 0,233120603  | 4,673363342 | 1,12396   | 0,300021043 |
| 5118 | ENSG00000153234 | 1,611869046  | 4,649105632 | 10,000282 | 0,004335628 |
| 5119 | ENSG00000153246 | 0,639032088  | 4,773657381 | 4,8258358 | 0,038326466 |
| 5120 | ENSG00000153250 | -0,162072376 | 6,867473186 | 1,1744119 | 0,289656774 |
| 5121 | ENSG00000153291 | 0,253356781  | 4,747729806 | 2,0306546 | 0,167518808 |
| 5122 | ENSG00000153310 | -0,168639113 | 5,129000569 | 0,8808581 | 0,357671898 |
| 5123 | ENSG00000153317 | 0,045690418  | 5,795018352 | 0,074177  | 0,78776776  |
| 5124 | ENSG00000153339 | -0,091831109 | 6,149418361 | 0,3598082 | 0,554448532 |
| 5125 | ENSG00000153395 | -0,141323055 | 4,156286487 | 0,6816514 | 0,41745953  |
| 5126 | ENSG00000153531 | 0,441605665  | 7,497487858 | 2,2015053 | 0,15138591  |
| 5127 | ENSG00000153560 | 0,025113213  | 5,692990559 | 0,0550458 | 0,816563707 |
| 5128 | ENSG00000153561 | -0,181861913 | 7,29153777  | 1,1399742 | 0,296683321 |
| 5129 | ENSG00000153707 | 0,539336866  | 4,348240448 | 1,7168099 | 0,202976914 |
| 5130 | ENSG00000153721 | -0,283688657 | 4,669614374 | 1,269576  | 0,271409057 |
| 5131 | ENSG00000153774 | -0,18467173  | 4,509828604 | 1,7680281 | 0,231003839 |



|      |                 |              |             |           |             |
|------|-----------------|--------------|-------------|-----------|-------------|
| 5132 | ENSG00000153786 | -0,102014472 | 5,267497479 | 0,5640281 | 0,460194248 |
| 5133 | ENSG00000153814 | -0,030401729 | 4,553637803 | 0,0423319 | 0,944995183 |
| 5134 | ENSG00000153815 | -0,297787589 | 4,000800801 | 1,1000654 | 0,305095948 |
| 5135 | ENSG00000153820 | -0,257791662 | 6,812885618 | 0,4150787 | 0,52574574  |
| 5136 | ENSG00000153823 | -0,329568323 | 4,268109372 | 1,4729518 | 0,237137459 |
| 5137 | ENSG00000153827 | 0,045363375  | 7,879888387 | 0,22663   | 0,638487621 |
| 5138 | ENSG00000153879 | -0,261492695 | 5,118456004 | 4,2723715 | 0,05007436  |
| 5139 | ENSG00000153904 | 0,409331577  | 4,661129208 | 4,5340569 | 0,044096699 |
| 5140 | ENSG00000153914 | -0,140005712 | 6,802400771 | 0,8414245 | 0,368462793 |
| 5141 | ENSG00000153922 | -0,039986885 | 6,405755941 | 0,0248857 | 0,876022407 |
| 5142 | ENSG00000153933 | 0,077807007  | 4,392447304 | 0,2599424 | 0,614993938 |
| 5143 | ENSG00000153936 | 0,202457506  | 4,907350274 | 1,1682902 | 0,290902415 |
| 5144 | ENSG00000153944 | 0,160437893  | 6,318029852 | 0,9001514 | 0,352556672 |
| 5145 | ENSG00000153956 | 0,108096241  | 6,817450969 | 0,3202308 | 0,576922348 |
| 5146 | ENSG00000153989 | 0,033105757  | 5,28439311  | 0,0485321 | 0,827571855 |
| 5147 | ENSG00000154001 | -0,065032563 | 5,598302431 | 0,307304  | 0,584645394 |
| 5148 | ENSG00000154059 | 0,158689395  | 5,046959299 | 1,0322127 | 0,320157514 |
| 5149 | ENSG00000154114 | -0,085717885 | 5,170348219 | 0,3012922 | 0,588337485 |
| 5150 | ENSG00000154122 | 0,221570272  | 6,624054915 | 2,3669734 | 0,137473827 |
| 5151 | ENSG00000154124 | -0,040186829 | 5,015361181 | 0,0676179 | 0,797139746 |
| 5152 | ENSG00000154133 | -0,032215985 | 4,281246101 | 0,0189508 | 0,891699779 |
| 5153 | ENSG00000154144 | -0,019648938 | 4,632095103 | 0,0316145 | 0,860420196 |
| 5154 | ENSG00000154153 | -1,225853261 | 7,789797297 | 9,3173824 | 0,005628138 |
| 5155 | ENSG00000154174 | -0,190000229 | 6,595299252 | 2,0201513 | 0,168530533 |
| 5156 | ENSG00000154175 | 0,121013082  | 6,484307842 | 0,2772382 | 0,603534027 |
| 5157 | ENSG00000154188 | 0,423004577  | 4,398043226 | 0,9723659 | 0,334301794 |
| 5158 | ENSG00000154217 | -0,400764887 | 4,466815155 | 3,2479169 | 0,084572327 |
| 5159 | ENSG00000154222 | 0,123651938  | 4,337305311 | 0,5592895 | 0,4921215   |
| 5160 | ENSG00000154229 | 0,885453773  | 4,564906178 | 8,3781158 | 0,008150447 |
| 5161 | ENSG00000154240 | 0,043960021  | 4,944518906 | 0,1383351 | 0,713318258 |
| 5162 | ENSG00000154258 | -0,611425217 | 6,953535225 | 6,8569522 | 0,015321665 |
| 5163 | ENSG00000154262 | -0,239653177 | 7,274926485 | 1,0685537 | 0,311967896 |
| 5164 | ENSG00000154263 | -0,71653237  | 6,245276892 | 6,4283841 | 0,018448848 |
| 5165 | ENSG00000154265 | -0,208117937 | 6,139436265 | 1,302271  | 0,265485156 |
| 5166 | ENSG00000154277 | 1,344594151  | 4,281173488 | 16,903506 | 0,000423007 |
| 5167 | ENSG00000154305 | 0,079326629  | 6,574337078 | 0,6109973 | 0,442319176 |
| 5168 | ENSG00000154309 | 0,261986513  | 3,792156067 | 1,9150192 | 0,179626139 |
| 5169 | ENSG00000154310 | -0,115224987 | 5,387259822 | 0,1924463 | 0,66496171  |
| 5170 | ENSG00000154328 | -0,236553622 | 4,214662027 | 2,8857646 | 0,130332265 |
| 5171 | ENSG00000154330 | -0,1864809   | 7,805327381 | 0,7689609 | 0,389562432 |
| 5172 | ENSG00000154358 | -0,022259125 | 8,114462044 | 0,0038005 | 0,951372755 |
| 5173 | ENSG00000154359 | -0,096913681 | 4,576114052 | 0,5429578 | 0,517213652 |
| 5174 | ENSG00000154380 | 0,464941415  | 7,105530117 | 11,730616 | 0,002294257 |
| 5175 | ENSG00000154415 | -0,841554281 | 7,370934538 | 2,8456027 | 0,105076709 |
| 5176 | ENSG00000154429 | 0,052918182  | 3,892441277 | 0,2131981 | 0,71163486  |
| 5177 | ENSG00000154447 | 0,240292802  | 4,26871577  | 1,9449364 | 0,176394324 |
| 5178 | ENSG00000154473 | -0,017749533 | 5,325777278 | 0,0219404 | 0,956181876 |
| 5179 | ENSG00000154511 | 0,206401276  | 3,798173829 | 0,723374  | 0,403764632 |
| 5180 | ENSG00000154518 | -0,593627243 | 8,313219783 | 12,424913 | 0,00179777  |
| 5181 | ENSG00000154529 | -1,036141933 | 5,876587347 | 5,677109  | 0,025792705 |
| 5182 | ENSG00000154553 | -0,086094914 | 7,982637315 | 0,1090539 | 0,744198438 |
| 5183 | ENSG00000154556 | 0,366744188  | 8,992814678 | 1,5053455 | 0,232202413 |
| 5184 | ENSG00000154582 | -0,464904158 | 5,382119909 | 7,4527133 | 0,011906404 |
| 5185 | ENSG00000154608 | 0,064090288  | 4,414015927 | 0,4610645 | 0,646925446 |
| 5186 | ENSG00000154639 | 0,856916747  | 5,435693267 | 4,7331768 | 0,040061364 |
| 5187 | ENSG00000154642 | 0,018707774  | 4,744550442 | 0,0061825 | 0,93800459  |
| 5188 | ENSG00000154655 | -0,207364046 | 4,480183463 | 1,4481988 | 0,24099883  |
| 5189 | ENSG00000154678 | 0,23911461   | 7,303193706 | 0,5760201 | 0,455547455 |
| 5190 | ENSG00000154719 | -0,581230876 | 4,786569982 | 6,526623  | 0,017673986 |

|      |                 |              |             |           |             |
|------|-----------------|--------------|-------------|-----------|-------------|
| 5191 | ENSG00000154721 | -0,165622082 | 5,564448264 | 1,0883786 | 0,307620362 |
| 5192 | ENSG00000154723 | -0,667367911 | 7,393564206 | 10,724036 | 0,003311576 |
| 5193 | ENSG00000154727 | 0,037993835  | 5,571063737 | 0,0382871 | 0,846577772 |
| 5194 | ENSG00000154734 | -0,415452045 | 7,472873373 | 2,0928144 | 0,16141988  |
| 5195 | ENSG00000154736 | -0,26393372  | 5,000657805 | 0,7289508 | 0,401985892 |
| 5196 | ENSG00000154743 | -0,30168913  | 3,9213631   | 10,942266 | 0,079278533 |
| 5197 | ENSG00000154767 | 0,628892373  | 4,202331902 | 15,886348 | 0,000578406 |
| 5198 | ENSG00000154781 | 0,07343357   | 4,063812058 | 0,4034626 | 0,664999373 |
| 5199 | ENSG00000154783 | -0,014948059 | 4,624659961 | 0,0045289 | 0,946924124 |
| 5200 | ENSG00000154803 | -0,026238537 | 4,848096404 | 0,017856  | 0,894854756 |
| 5201 | ENSG00000154813 | -0,38544115  | 5,066806683 | 4,3036853 | 0,049348074 |
| 5202 | ENSG00000154814 | -0,215515935 | 4,644542558 | 3,4198212 | 0,095979496 |
| 5203 | ENSG00000154822 | -0,446292456 | 6,114386326 | 3,6523896 | 0,068468572 |
| 5204 | ENSG00000154845 | 0,150594516  | 6,176829103 | 1,4503266 | 0,240621656 |
| 5205 | ENSG00000154856 | -0,45029966  | 4,724861818 | 2,2215454 | 0,149618606 |
| 5206 | ENSG00000154874 | -0,075094126 | 5,642917429 | 0,0583236 | 0,81129521  |
| 5207 | ENSG00000154889 | 0,244878718  | 3,89520506  | 2,3433742 | 0,18501378  |
| 5208 | ENSG00000154898 | 0,153674432  | 4,312512294 | 0,1843526 | 0,67163503  |
| 5209 | ENSG00000154917 | -0,348435663 | 4,876743881 | 2,5997408 | 0,120453655 |
| 5210 | ENSG00000154930 | -0,215442839 | 5,824769805 | 0,8964088 | 0,353540771 |
| 5211 | ENSG00000154945 | -0,045148418 | 5,585276141 | 0,0821513 | 0,77695651  |
| 5212 | ENSG00000154978 | 0,293307346  | 4,942640551 | 4,0725596 | 0,05532107  |
| 5213 | ENSG00000155008 | -0,17084096  | 5,161220946 | 1,000666  | 0,327507832 |
| 5214 | ENSG00000155016 | 0,33791391   | 4,715879179 | 7,821909  | 0,010197081 |
| 5215 | ENSG00000155085 | -0,32038779  | 3,999457547 | 5,3132625 | 0,056284333 |
| 5216 | ENSG00000155090 | 0,291167268  | 5,982140702 | 0,6564602 | 0,426076332 |
| 5217 | ENSG00000155096 | 0,196327664  | 7,059405966 | 0,9961223 | 0,328585654 |
| 5218 | ENSG00000155097 | -0,004440192 | 5,943478492 | 0,0009832 | 0,975253627 |
| 5219 | ENSG00000155099 | -0,327216437 | 4,528509493 | 3,7328619 | 0,065700566 |
| 5220 | ENSG00000155100 | -0,202786641 | 4,27643974  | 0,7018434 | 0,41074481  |
| 5221 | ENSG00000155111 | 0,246236918  | 4,369532572 | 2,3533806 | 0,138587577 |
| 5222 | ENSG00000155115 | -0,560372694 | 5,256045244 | 11,476821 | 0,002520397 |
| 5223 | ENSG00000155158 | 0,477013154  | 4,165334449 | 4,5651525 | 0,0434374   |
| 5224 | ENSG00000155189 | 0,048634279  | 4,009259043 | 0,0903837 | 0,766377609 |
| 5225 | ENSG00000155229 | 0,041339624  | 5,420805307 | 0,1006493 | 0,753890047 |
| 5226 | ENSG00000155252 | 0,131341968  | 3,923124716 | 0,7739845 | 0,465334464 |
| 5227 | ENSG00000155256 | 0,218948524  | 4,199486307 | 2,1553708 | 0,20121304  |
| 5228 | ENSG00000155287 | -0,209055972 | 4,414686328 | 1,9810075 | 0,172563917 |
| 5229 | ENSG00000155304 | -0,191165409 | 5,605144949 | 0,4224774 | 0,522111962 |
| 5230 | ENSG00000155313 | 0,022761062  | 6,601556932 | 0,0254642 | 0,874598395 |
| 5231 | ENSG00000155324 | -0,127437247 | 4,284655917 | 0,6951174 | 0,412963024 |
| 5232 | ENSG00000155329 | -0,24584022  | 4,073805444 | 1,1000381 | 0,30510181  |
| 5233 | ENSG00000155330 | -0,266252842 | 3,867242316 | 2,5222631 | 0,162019119 |
| 5234 | ENSG00000155363 | -0,143373663 | 4,094077659 | 0,5295118 | 0,474119782 |
| 5235 | ENSG00000155366 | -0,145079738 | 5,803271649 | 0,6295111 | 0,435604762 |
| 5236 | ENSG00000155368 | -0,171352828 | 6,674310494 | 0,687069  | 0,415641549 |
| 5237 | ENSG00000155380 | 0,065571153  | 7,061110733 | 0,0638343 | 0,802768699 |
| 5238 | ENSG00000155393 | -0,297759354 | 4,149163488 | 6,1813053 | 0,057470403 |
| 5239 | ENSG00000155438 | 0,016486049  | 4,010493543 | 0,0062511 | 0,93766234  |
| 5240 | ENSG00000155463 | -0,075938522 | 6,258882384 | 0,3952263 | 0,535707656 |
| 5241 | ENSG00000155506 | 0,126801849  | 6,769514323 | 0,2896743 | 0,595574948 |
| 5242 | ENSG00000155508 | -0,069987178 | 5,019749303 | 0,3452681 | 0,594275361 |
| 5243 | ENSG00000155545 | -0,011817398 | 5,051771803 | 0,0039525 | 0,950411436 |
| 5244 | ENSG00000155561 | -0,195109836 | 5,472663076 | 3,0517421 | 0,093881532 |
| 5245 | ENSG00000155592 | -0,106539273 | 3,692507997 | 0,4091573 | 0,538040046 |
| 5246 | ENSG00000155629 | -0,351145393 | 3,953325104 | 2,3888406 | 0,135787723 |
| 5247 | ENSG00000155636 | -0,142949647 | 3,701359429 | 1,0422114 | 0,463860454 |
| 5248 | ENSG00000155657 | -0,39118869  | 15,66723424 | 0,640484  | 0,431685143 |
| 5249 | ENSG00000155659 | -1,444545331 | 5,445675459 | 21,10256  | 0,000126741 |

|      |                 |              |             |           |             |
|------|-----------------|--------------|-------------|-----------|-------------|
| 5250 | ENSG00000155660 | -0,343873598 | 5,702655633 | 1,3936036 | 0,249804293 |
| 5251 | ENSG00000155729 | 0,22855222   | 3,977931707 | 3,236297  | 0,179139754 |
| 5252 | ENSG00000155744 | -0,090390463 | 5,289263939 | 0,3138627 | 0,580709684 |
| 5253 | ENSG00000155754 | -0,121803179 | 3,938080354 | 0,2065055 | 0,653759318 |
| 5254 | ENSG00000155755 | 0,16721629   | 4,734393827 | 1,3735959 | 0,253110216 |
| 5255 | ENSG00000155760 | 0,963932598  | 4,573220482 | 48,486043 | 4,06211E-07 |
| 5256 | ENSG00000155827 | 0,047228369  | 5,715778169 | 0,180512  | 0,674849133 |
| 5257 | ENSG00000155846 | -0,151256477 | 4,884129556 | 0,3931203 | 0,536808659 |
| 5258 | ENSG00000155849 | 0,070896063  | 4,771156897 | 0,1609819 | 0,691939476 |
| 5259 | ENSG00000155850 | 0,030130633  | 4,773667023 | 0,0421037 | 0,839218154 |
| 5260 | ENSG00000155868 | -0,254295018 | 3,998755254 | 2,3495664 | 0,16118812  |
| 5261 | ENSG00000155876 | -0,042117357 | 5,718455282 | 0,1589019 | 0,693815585 |
| 5262 | ENSG00000155893 | 0,173332405  | 3,915137712 | 0,7507304 | 0,395150919 |
| 5263 | ENSG00000155903 | 0,078461121  | 4,775235148 | 0,210505  | 0,650657317 |
| 5264 | ENSG00000155906 | -0,233625576 | 4,295625754 | 4,1295514 | 0,13974229  |
| 5265 | ENSG00000155926 | -0,791929059 | 4,084113245 | 4,9870398 | 0,03550551  |
| 5266 | ENSG00000155957 | 0,066773147  | 4,248531738 | 0,1660187 | 0,687423902 |
| 5267 | ENSG00000155959 | -0,540882783 | 5,947564032 | 4,0113782 | 0,057058675 |
| 5268 | ENSG00000155962 | -0,352640186 | 4,566616155 | 2,2064599 | 0,150946654 |
| 5269 | ENSG00000155970 | 0,076727768  | 4,612504054 | 0,1316151 | 0,720059888 |
| 5270 | ENSG00000155975 | -0,159392673 | 5,659416576 | 0,9739269 | 0,333921961 |
| 5271 | ENSG00000156011 | -0,380560282 | 8,007229101 | 1,5582307 | 0,224422143 |
| 5272 | ENSG00000156017 | 0,14562655   | 4,390119404 | 0,5785544 | 0,454569768 |
| 5273 | ENSG00000156026 | -0,031364694 | 4,378210391 | 0,0744239 | 0,80003459  |
| 5274 | ENSG00000156030 | 0,561134491  | 4,906867224 | 4,4386391 | 0,046191246 |
| 5275 | ENSG00000156042 | 0,306001559  | 3,57271901  | 2,1690535 | 0,154301176 |
| 5276 | ENSG00000156052 | 0,253476251  | 5,784419328 | 1,3840071 | 0,251394571 |
| 5277 | ENSG00000156096 | -0,980772094 | 4,113417463 | 5,1894788 | 0,032287215 |
| 5278 | ENSG00000156103 | 0,569831439  | 4,008935    | 3,3771549 | 0,078995876 |
| 5279 | ENSG00000156110 | -0,576951121 | 4,793439652 | 13,610962 | 0,001205402 |
| 5280 | ENSG00000156136 | 0,129810332  | 3,665291762 | 0,4514916 | 0,508288928 |
| 5281 | ENSG00000156162 | 0,024944307  | 5,67927405  | 0,0107584 | 0,918283989 |
| 5282 | ENSG00000156170 | -0,253652369 | 4,073141261 | 2,7215301 | 0,130328259 |
| 5283 | ENSG00000156171 | -0,324529433 | 5,251044318 | 2,7884211 | 0,108437385 |
| 5284 | ENSG00000156218 | 0,194659933  | 5,645149455 | 0,730311  | 0,401553859 |
| 5285 | ENSG00000156219 | -0,636956901 | 4,992546504 | 4,2453923 | 0,050786486 |
| 5286 | ENSG00000156232 | 0,139295578  | 3,775298261 | 0,7156077 | 0,464564047 |
| 5287 | ENSG00000156239 | -0,142345684 | 4,337392104 | 0,8491063 | 0,366324276 |
| 5288 | ENSG00000156253 | -0,459828263 | 4,219603229 | 6,6987061 | 0,016402169 |
| 5289 | ENSG00000156256 | -0,271372619 | 6,290098695 | 1,5192622 | 0,230122357 |
| 5290 | ENSG00000156261 | -0,375452221 | 6,813139828 | 3,1410903 | 0,089525999 |
| 5291 | ENSG00000156273 | 0,099176642  | 6,209439357 | 0,2362774 | 0,631484579 |
| 5292 | ENSG00000156298 | -0,230062373 | 5,017208068 | 3,4129808 | 0,077480626 |
| 5293 | ENSG00000156304 | 0,001478539  | 4,35088765  | 3,912E-05 | 0,99506323  |
| 5294 | ENSG00000156313 | -0,316078147 | 4,006028512 | 3,0545059 | 0,093788021 |
| 5295 | ENSG00000156381 | -0,187250628 | 5,488153154 | 1,2324353 | 0,278350685 |
| 5296 | ENSG00000156411 | -0,727135442 | 6,978377194 | 10,093827 | 0,004185562 |
| 5297 | ENSG00000156453 | -0,499095378 | 4,235694328 | 2,9960745 | 0,096797124 |
| 5298 | ENSG00000156463 | -0,003103777 | 6,295883429 | 0,0002481 | 0,987567628 |
| 5299 | ENSG00000156467 | -0,904853695 | 9,534667783 | 8,6690338 | 0,007256527 |
| 5300 | ENSG00000156469 | -0,688127123 | 4,346674958 | 21,21181  | 0,000122504 |
| 5301 | ENSG00000156471 | -1,150346111 | 7,003948681 | 33,533535 | 6,58832E-06 |
| 5302 | ENSG00000156482 | 0,230155763  | 7,259390742 | 1,2207138 | 0,280589942 |
| 5303 | ENSG00000156502 | -0,212640795 | 4,836761136 | 3,1986912 | 0,086768721 |
| 5304 | ENSG00000156504 | 0,132642583  | 4,30147915  | 1,2769788 | 0,347462408 |
| 5305 | ENSG00000156508 | 0,445718769  | 12,56262311 | 2,5668648 | 0,122656823 |
| 5306 | ENSG00000156515 | -0,133888915 | 7,581724352 | 0,5521618 | 0,464922208 |
| 5307 | ENSG00000156531 | -0,03519086  | 4,748153556 | 0,0518587 | 0,821862391 |
| 5308 | ENSG00000156535 | -0,173518069 | 5,793683025 | 0,6544731 | 0,426767731 |

|      |                 |              |             |           |             |
|------|-----------------|--------------|-------------|-----------|-------------|
| 5309 | ENSG00000156587 | 0,367321814  | 4,213117    | 3,0139262 | 0,095866074 |
| 5310 | ENSG00000156599 | -0,027215847 | 5,876752977 | 0,0415806 | 0,840199956 |
| 5311 | ENSG00000156639 | -0,013949681 | 5,231532407 | 0,0085292 | 0,927212895 |
| 5312 | ENSG00000156642 | -0,238971607 | 6,87371216  | 3,9660948 | 0,058328997 |
| 5313 | ENSG00000156650 | -0,035954169 | 6,060629459 | 0,0950787 | 0,760569643 |
| 5314 | ENSG00000156671 | -0,023523378 | 6,22128162  | 0,024733  | 0,876399154 |
| 5315 | ENSG00000156675 | 0,666989128  | 4,997661265 | 13,790207 | 0,001135558 |
| 5316 | ENSG00000156697 | -0,137094308 | 3,872500722 | 0,8199999 | 0,478801771 |
| 5317 | ENSG00000156709 | -0,391516792 | 6,195621357 | 5,1414807 | 0,033019618 |
| 5318 | ENSG00000156735 | 0,013731895  | 4,509391817 | 0,0067532 | 0,9352126   |
| 5319 | ENSG00000156787 | 0,057084106  | 4,038678776 | 0,0604387 | 0,807973829 |
| 5320 | ENSG00000156795 | -0,469509538 | 3,912427681 | 4,3735941 | 0,047683378 |
| 5321 | ENSG00000156802 | -0,029285223 | 5,002766711 | 0,0252253 | 0,875186658 |
| 5322 | ENSG00000156804 | -0,013097448 | 8,354043862 | 0,0016629 | 0,967822947 |
| 5323 | ENSG00000156831 | -0,239217858 | 4,339926826 | 2,081496  | 0,162510164 |
| 5324 | ENSG00000156885 | -0,160249905 | 6,085802762 | 0,3033498 | 0,587074762 |
| 5325 | ENSG00000156928 | -0,427455151 | 4,414226218 | 9,5025732 | 0,005226412 |
| 5326 | ENSG00000156931 | 0,476867208  | 6,368780232 | 3,7384912 | 0,065511763 |
| 5327 | ENSG00000156958 | 0,15285853   | 4,818402671 | 1,2072292 | 0,283163744 |
| 5328 | ENSG00000156976 | -0,028706074 | 8,63770801  | 0,0205795 | 0,887173683 |
| 5329 | ENSG00000156990 | -0,368018487 | 3,973440424 | 5,6288755 | 0,032256686 |
| 5330 | ENSG00000157020 | 0,044493632  | 5,438642052 | 0,1481732 | 0,707837712 |
| 5331 | ENSG00000157036 | 0,032739036  | 4,912365277 | 0,0174447 | 0,896065264 |
| 5332 | ENSG00000157045 | -0,102933667 | 4,015255904 | 0,5487214 | 0,604387432 |
| 5333 | ENSG00000157064 | 0,418566309  | 5,118678292 | 1,2548354 | 0,274136538 |
| 5334 | ENSG00000157077 | 0,083124476  | 5,281642924 | 0,6294535 | 0,435597555 |
| 5335 | ENSG00000157106 | 0,010910706  | 7,826303064 | 0,0046015 | 0,946499072 |
| 5336 | ENSG00000157107 | 0,2139238    | 5,563903223 | 1,1832567 | 0,287907613 |
| 5337 | ENSG00000157110 | -0,156131026 | 6,416782992 | 0,7209677 | 0,40453577  |
| 5338 | ENSG00000157150 | 0,074072061  | 4,564800108 | 0,0198827 | 0,889086805 |
| 5339 | ENSG00000157181 | -0,141923398 | 5,257164062 | 0,6403485 | 0,431733222 |
| 5340 | ENSG00000157184 | 0,28626076   | 3,888800727 | 2,8215631 | 0,129313621 |
| 5341 | ENSG00000157191 | 0,072334254  | 4,334871912 | 0,1343703 | 0,717277533 |
| 5342 | ENSG00000157212 | -0,080040344 | 3,600566469 | 0,3336133 | 0,664350141 |
| 5343 | ENSG00000157214 | 0,059826974  | 6,059336621 | 0,0785486 | 0,781767185 |
| 5344 | ENSG00000157216 | -0,113531918 | 4,287813958 | 0,3744132 | 0,546581152 |
| 5345 | ENSG00000157224 | -0,389561467 | 5,43381366  | 4,7321827 | 0,040080449 |
| 5346 | ENSG00000157227 | 0,005572411  | 5,197722853 | 0,0004557 | 0,983152255 |
| 5347 | ENSG00000157240 | 0,286692484  | 4,678225296 | 2,8581532 | 0,104355445 |
| 5348 | ENSG00000157259 | 0,171850033  | 5,003229045 | 1,5053126 | 0,23218207  |
| 5349 | ENSG00000157326 | -0,155596512 | 3,950405219 | 0,7769888 | 0,387138687 |
| 5350 | ENSG00000157349 | 0,002525134  | 4,084342696 | 0,0004226 | 0,994371717 |
| 5351 | ENSG00000157350 | -0,280361437 | 4,013745995 | 2,1751352 | 0,153749735 |
| 5352 | ENSG00000157426 | -0,070248038 | 4,24750977  | 0,2608368 | 0,704965036 |
| 5353 | ENSG00000157445 | -0,327221362 | 4,535622988 | 2,7068056 | 0,113454145 |
| 5354 | ENSG00000157450 | 0,064794388  | 4,834495343 | 0,4081156 | 0,625173746 |
| 5355 | ENSG00000157483 | 0,048848172  | 4,686800015 | 0,161645  | 0,739160009 |
| 5356 | ENSG00000157500 | -0,079542324 | 6,584808233 | 0,223103  | 0,641115074 |
| 5357 | ENSG00000157510 | 0,272290047  | 5,625903102 | 3,4584335 | 0,075698301 |
| 5358 | ENSG00000157514 | 0,747907498  | 6,235799566 | 3,2241209 | 0,085647814 |
| 5359 | ENSG00000157538 | -0,060291098 | 5,396146535 | 0,4335472 | 0,525853256 |
| 5360 | ENSG00000157540 | -0,008597766 | 6,925251888 | 0,0043844 | 0,947774288 |
| 5361 | ENSG00000157554 | -0,106816983 | 4,641490445 | 0,6130545 | 0,441561857 |
| 5362 | ENSG00000157557 | -0,346198629 | 6,21746231  | 3,1674575 | 0,088272885 |
| 5363 | ENSG00000157570 | -0,054816842 | 6,337076921 | 0,0349163 | 0,853401579 |
| 5364 | ENSG00000157593 | -0,04831902  | 4,30757595  | 0,1615593 | 0,69606206  |
| 5365 | ENSG00000157600 | 0,047588441  | 5,328165062 | 0,0654121 | 0,800400185 |
| 5366 | ENSG00000157601 | 0,540666143  | 4,575332476 | 6,096539  | 0,021358798 |
| 5367 | ENSG00000157617 | 0,699665746  | 4,891933773 | 3,1109748 | 0,090982478 |

|      |                 |              |             |           |             |
|------|-----------------|--------------|-------------|-----------|-------------|
| 5368 | ENSG00000157625 | 0,065140878  | 4,894986104 | 0,4612339 | 0,555360915 |
| 5369 | ENSG00000157637 | 0,368954474  | 5,017433461 | 4,0412448 | 0,056211249 |
| 5370 | ENSG00000157654 | 0,011547682  | 8,08255614  | 0,0058843 | 0,939512896 |
| 5371 | ENSG00000157680 | 1,463510543  | 5,586138491 | 16,879946 | 0,000426041 |
| 5372 | ENSG00000157734 | -1,691382486 | 4,532956843 | 17,92614  | 0,000311548 |
| 5373 | ENSG00000157741 | 0,282650337  | 5,961960825 | 3,5070535 | 0,073803203 |
| 5374 | ENSG00000157764 | 0,103602329  | 6,115101224 | 0,9684631 | 0,335218844 |
| 5375 | ENSG00000157796 | 0,150019779  | 4,766061674 | 0,5542905 | 0,464072969 |
| 5376 | ENSG00000157800 | 0,098736395  | 4,59096702  | 0,5245878 | 0,476134222 |
| 5377 | ENSG00000157823 | -0,069883377 | 4,29078288  | 0,2272826 | 0,638014588 |
| 5378 | ENSG00000157827 | -0,100185286 | 4,919287    | 0,180421  | 0,674939811 |
| 5379 | ENSG00000157837 | 0,274981254  | 4,757466833 | 4,0306782 | 0,056471344 |
| 5380 | ENSG00000157869 | 0,015892045  | 4,832853072 | 0,0117921 | 0,914463787 |
| 5381 | ENSG00000157881 | -0,099952778 | 4,195733507 | 0,3204359 | 0,576801192 |
| 5382 | ENSG00000157916 | -0,191848973 | 5,573877153 | 4,2131552 | 0,051561346 |
| 5383 | ENSG00000157933 | 0,243698569  | 5,065030094 | 0,7778669 | 0,386874921 |
| 5384 | ENSG00000157954 | -0,015576948 | 5,418954902 | 0,0191935 | 0,891008902 |
| 5385 | ENSG00000157985 | -0,147579726 | 4,869831253 | 0,4295725 | 0,518669842 |
| 5386 | ENSG00000158019 | -0,088825742 | 5,056989946 | 0,4289603 | 0,518942805 |
| 5387 | ENSG00000158022 | -0,409423969 | 6,694251216 | 2,9209767 | 0,100830554 |
| 5388 | ENSG00000158042 | -0,271071545 | 4,573674721 | 4,2577129 | 0,056175218 |
| 5389 | ENSG00000158079 | 0,246351057  | 4,897912703 | 1,9556184 | 0,175257598 |
| 5390 | ENSG00000158092 | 0,001506735  | 4,790253377 | 7,789E-05 | 0,993034272 |
| 5391 | ENSG00000158109 | 0,173789228  | 5,404906383 | 1,517473  | 0,230356448 |
| 5392 | ENSG00000158122 | -0,355012945 | 4,365562993 | 5,0910553 | 0,033809158 |
| 5393 | ENSG00000158158 | -0,095931532 | 4,528453031 | 0,1403114 | 0,711386515 |
| 5394 | ENSG00000158161 | 0,101418581  | 4,893127848 | 0,6211143 | 0,481137935 |
| 5395 | ENSG00000158169 | -0,227420705 | 4,441255363 | 0,6082682 | 0,443354499 |
| 5396 | ENSG00000158186 | -0,224209337 | 7,264361319 | 1,5776156 | 0,221652983 |
| 5397 | ENSG00000158195 | 0,454983717  | 6,083676586 | 3,1952321 | 0,08697473  |
| 5398 | ENSG00000158258 | 0,099324608  | 6,170545458 | 0,0769282 | 0,783969865 |
| 5399 | ENSG00000158270 | 0,2892757    | 5,452488224 | 1,0901496 | 0,307236    |
| 5400 | ENSG00000158286 | 0,346794963  | 5,217529766 | 1,4239383 | 0,244861727 |
| 5401 | ENSG00000158290 | 0,263897459  | 6,015461111 | 2,5149926 | 0,126356124 |
| 5402 | ENSG00000158301 | 0,302732585  | 4,818609015 | 3,7370878 | 0,065558775 |
| 5403 | ENSG00000158321 | -0,317095128 | 4,683713871 | 3,889053  | 0,060684217 |
| 5404 | ENSG00000158352 | -0,178776745 | 4,92365856  | 0,7341793 | 0,400328953 |
| 5405 | ENSG00000158411 | -0,017975668 | 3,831953544 | 0,0148075 | 0,96138474  |
| 5406 | ENSG00000158417 | -0,047874857 | 6,922457134 | 0,0723062 | 0,79039388  |
| 5407 | ENSG00000158435 | -0,036798921 | 4,992418213 | 0,0925336 | 0,763692953 |
| 5408 | ENSG00000158467 | 0,352041719  | 3,912948701 | 4,2295625 | 0,051185239 |
| 5409 | ENSG00000158470 | -0,315211505 | 5,339090267 | 3,4642859 | 0,075474622 |
| 5410 | ENSG00000158526 | 0,240693257  | 4,77618382  | 3,4452879 | 0,07779463  |
| 5411 | ENSG00000158528 | -0,118194414 | 6,415130248 | 0,2265555 | 0,63855803  |
| 5412 | ENSG00000158560 | -0,414581351 | 4,774383451 | 3,5287281 | 0,072985905 |
| 5413 | ENSG00000158604 | 0,176171396  | 5,929592568 | 2,8124549 | 0,10696291  |
| 5414 | ENSG00000158615 | 0,469960959  | 6,057121152 | 2,8745053 | 0,10342434  |
| 5415 | ENSG00000158623 | -0,043431237 | 4,663986465 | 0,0882325 | 0,772042067 |
| 5416 | ENSG00000158636 | -0,088169341 | 4,940476702 | 0,5785012 | 0,454563605 |
| 5417 | ENSG00000158669 | -0,079156133 | 5,317314302 | 0,4180529 | 0,524257405 |
| 5418 | ENSG00000158691 | 0,060432234  | 3,602759644 | 0,368364  | 0,751488525 |
| 5419 | ENSG00000158710 | 0,031475243  | 6,750052426 | 0,0174058 | 0,896180505 |
| 5420 | ENSG00000158711 | -0,039920105 | 6,345955779 | 0,0719321 | 0,7909204   |
| 5421 | ENSG00000158747 | 0,252691406  | 5,097732883 | 1,0648713 | 0,31278461  |
| 5422 | ENSG00000158769 | 0,189081611  | 3,98157367  | 0,6828341 | 0,417061611 |
| 5423 | ENSG00000158773 | -0,019880346 | 4,604912639 | 0,0200364 | 0,888658103 |
| 5424 | ENSG00000158793 | -0,19356925  | 4,04664564  | 2,1503315 | 0,225513856 |
| 5425 | ENSG00000158796 | -0,156396561 | 4,100782081 | 1,5844543 | 0,330458472 |
| 5426 | ENSG00000158813 | -0,647560057 | 3,882283566 | 8,9827372 | 0,006411783 |

|      |                 |              |             |           |             |
|------|-----------------|--------------|-------------|-----------|-------------|
| 5427 | ENSG00000158828 | -0,104305526 | 4,906029455 | 0,2652149 | 0,611450244 |
| 5428 | ENSG00000158856 | -0,224072949 | 4,990974562 | 0,8407341 | 0,368655874 |
| 5429 | ENSG00000158859 | -1,563836068 | 5,610137944 | 18,871684 | 0,000236541 |
| 5430 | ENSG00000158863 | 0,100805115  | 4,79666328  | 0,3584281 | 0,555203259 |
| 5431 | ENSG00000158864 | -0,434621043 | 7,298109338 | 6,2860726 | 0,019639072 |
| 5432 | ENSG00000158869 | -0,853787338 | 4,350232397 | 9,4125179 | 0,005425042 |
| 5433 | ENSG00000158882 | -0,612678083 | 4,32963655  | 10,242265 | 0,003959004 |
| 5434 | ENSG00000158941 | 0,087265558  | 4,744515759 | 0,2300354 | 0,636004955 |
| 5435 | ENSG00000158966 | 0,639182546  | 4,481432679 | 2,7329904 | 0,11181559  |
| 5436 | ENSG00000158985 | 0,04754265   | 5,030962972 | 0,0910865 | 0,765499368 |
| 5437 | ENSG00000158987 | 0,144251284  | 3,601994674 | 0,975203  | 0,432047428 |
| 5438 | ENSG00000159023 | 0,212844636  | 5,874392161 | 1,8564607 | 0,186164084 |
| 5439 | ENSG00000159063 | -0,126255689 | 4,217834378 | 1,1111847 | 0,454133585 |
| 5440 | ENSG00000159069 | 0,075229253  | 5,890254865 | 0,1654904 | 0,687893707 |
| 5441 | ENSG00000159082 | 0,063263018  | 4,554299013 | 0,1758014 | 0,678877923 |
| 5442 | ENSG00000159086 | -0,051368606 | 5,361509359 | 0,1307858 | 0,720899114 |
| 5443 | ENSG00000159111 | 0,019345187  | 4,760219563 | 0,0219278 | 0,956118114 |
| 5444 | ENSG00000159128 | -0,000934318 | 5,003587078 | 4,67E-05  | 0,994605927 |
| 5445 | ENSG00000159131 | -0,17905044  | 5,241741724 | 3,3094963 | 0,092896734 |
| 5446 | ENSG00000159140 | 0,008283242  | 8,089067326 | 0,0046152 | 0,946419323 |
| 5447 | ENSG00000159176 | 0,416758627  | 6,655007258 | 2,3131381 | 0,141848669 |
| 5448 | ENSG00000159189 | -0,2017033   | 5,271331523 | 0,4851575 | 0,493041607 |
| 5449 | ENSG00000159199 | -0,769970299 | 6,66525418  | 12,277506 | 0,001899588 |
| 5450 | ENSG00000159200 | 0,437789909  | 5,65386449  | 5,2813328 | 0,030935748 |
| 5451 | ENSG00000159202 | 0,239876675  | 5,528771022 | 3,1822975 | 0,08753058  |
| 5452 | ENSG00000159210 | -0,275168196 | 4,61548878  | 3,0205125 | 0,095525196 |
| 5453 | ENSG00000159216 | -0,106649548 | 4,372584975 | 0,0811611 | 0,778267208 |
| 5454 | ENSG00000159251 | -0,742558408 | 12,10949611 | 5,998371  | 0,022287722 |
| 5455 | ENSG00000159256 | 0,102976987  | 6,105051095 | 0,1530481 | 0,699222539 |
| 5456 | ENSG00000159267 | 0,050381626  | 4,043573187 | 0,1623507 | 0,768837202 |
| 5457 | ENSG00000159314 | -0,13886262  | 4,098250852 | 0,4602138 | 0,504260198 |
| 5458 | ENSG00000159322 | -0,023457359 | 4,718368467 | 0,0264741 | 0,87216004  |
| 5459 | ENSG00000159335 | -0,110395348 | 5,427051343 | 0,1737025 | 0,680687419 |
| 5460 | ENSG00000159346 | 0,039992853  | 6,327436443 | 0,0793248 | 0,780714005 |
| 5461 | ENSG00000159348 | 0,290096164  | 5,974958962 | 3,1108489 | 0,090988625 |
| 5462 | ENSG00000159352 | -0,273889366 | 6,426052935 | 3,0384374 | 0,094604571 |
| 5463 | ENSG00000159377 | -0,110465649 | 6,409883508 | 0,5810193 | 0,45360206  |
| 5464 | ENSG00000159388 | 0,156658907  | 7,113421358 | 0,1654796 | 0,687903321 |
| 5465 | ENSG00000159399 | -0,430877266 | 5,233321917 | 1,6817262 | 0,207492806 |
| 5466 | ENSG00000159403 | -0,035657405 | 7,994820627 | 0,0154012 | 0,902307979 |
| 5467 | ENSG00000159423 | 0,270691386  | 4,479051024 | 1,2533639 | 0,274410775 |
| 5468 | ENSG00000159433 | -0,208720273 | 6,060768993 | 0,6280036 | 0,436147628 |
| 5469 | ENSG00000159445 | -0,13766681  | 4,496435466 | 1,8546112 | 0,352334981 |
| 5470 | ENSG00000159459 | -0,072665195 | 6,375665125 | 0,2666416 | 0,610485134 |
| 5471 | ENSG00000159461 | 0,014247402  | 6,062611152 | 0,0109436 | 0,917583517 |
| 5472 | ENSG00000159479 | -0,164063112 | 4,142211383 | 1,9482227 | 0,349076132 |
| 5473 | ENSG00000159579 | 0,099424644  | 4,794536332 | 0,7281352 | 0,402214984 |
| 5474 | ENSG00000159592 | 0,06091024   | 6,625836162 | 0,5832248 | 0,452750106 |
| 5475 | ENSG00000159593 | -0,227937744 | 5,209569457 | 1,9372902 | 0,177213513 |
| 5476 | ENSG00000159596 | -0,132388907 | 4,105458354 | 1,2332796 | 0,434108824 |
| 5477 | ENSG00000159658 | 0,173922473  | 6,714786876 | 2,7405869 | 0,111298408 |
| 5478 | ENSG00000159692 | 0,011261606  | 5,188632771 | 0,0060083 | 0,938880957 |
| 5479 | ENSG00000159720 | -0,077581545 | 5,198194883 | 0,2040803 | 0,655658086 |
| 5480 | ENSG00000159788 | 0,156661026  | 3,684640726 | 0,7763267 | 0,466664946 |
| 5481 | ENSG00000159792 | 0,066016408  | 4,031846584 | 0,1160557 | 0,7364295   |
| 5482 | ENSG00000159840 | -0,242104558 | 5,357100856 | 0,813508  | 0,37638871  |
| 5483 | ENSG00000159842 | 0,24175009   | 6,324528687 | 0,9883148 | 0,330449188 |
| 5484 | ENSG00000159873 | 0,355143328  | 4,351558648 | 5,5705107 | 0,027070695 |
| 5485 | ENSG00000159899 | 0,225417911  | 4,089649917 | 1,0947222 | 0,306246607 |

|      |                 |              |             |           |             |
|------|-----------------|--------------|-------------|-----------|-------------|
| 5486 | ENSG00000159917 | 0,032752187  | 3,499613117 | 0,0610554 | 0,88665235  |
| 5487 | ENSG00000159921 | -0,011814288 | 4,778115088 | 0,0145388 | 0,905064473 |
| 5488 | ENSG00000160007 | -0,058690968 | 6,836018401 | 0,0969592 | 0,758300977 |
| 5489 | ENSG00000160014 | 0,274766255  | 6,952563244 | 1,8499176 | 0,186912594 |
| 5490 | ENSG00000160049 | 0,046832532  | 4,86955462  | 0,130049  | 0,78325584  |
| 5491 | ENSG00000160058 | 0,223991755  | 5,493512497 | 1,6221174 | 0,215456617 |
| 5492 | ENSG00000160075 | -0,292851465 | 5,721260284 | 3,1377789 | 0,089684823 |
| 5493 | ENSG00000160094 | 0,191989259  | 4,184638769 | 1,0747398 | 0,31060239  |
| 5494 | ENSG00000160097 | -0,711841065 | 5,855847414 | 5,4049038 | 0,029216331 |
| 5495 | ENSG00000160111 | -0,328572277 | 3,983222352 | 0,6229292 | 0,437982858 |
| 5496 | ENSG00000160131 | 0,093117236  | 5,351150958 | 0,3190727 | 0,577607401 |
| 5497 | ENSG00000160145 | 0,151536673  | 5,645299003 | 0,9256331 | 0,345958475 |
| 5498 | ENSG00000160179 | -0,601057418 | 4,467964388 | 4,3565491 | 0,048083335 |
| 5499 | ENSG00000160194 | -0,409399655 | 6,134376626 | 7,7818435 | 0,010372027 |
| 5500 | ENSG00000160201 | -0,214999656 | 5,495438893 | 1,9814738 | 0,172542921 |
| 5501 | ENSG00000160208 | 0,056835578  | 4,373166615 | 0,1695574 | 0,735146101 |
| 5502 | ENSG00000160209 | 0,225035372  | 5,821896978 | 0,7921923 | 0,382609168 |
| 5503 | ENSG00000160213 | -0,127905509 | 5,171100658 | 0,8279891 | 0,372220258 |
| 5504 | ENSG00000160216 | -0,139970405 | 5,644904825 | 0,6502126 | 0,428256091 |
| 5505 | ENSG00000160218 | 0,025416971  | 5,208740889 | 0,0331759 | 0,857054859 |
| 5506 | ENSG00000160219 | -0,093805509 | 5,692003819 | 0,121174  | 0,730915227 |
| 5507 | ENSG00000160221 | -0,1131936   | 6,23053346  | 0,4012029 | 0,532686955 |
| 5508 | ENSG00000160255 | -0,257194739 | 4,61987602  | 0,80028   | 0,380231339 |
| 5509 | ENSG00000160285 | -0,015920124 | 5,271131317 | 0,0038953 | 0,950770837 |
| 5510 | ENSG00000160294 | 0,053949069  | 5,19317669  | 0,0714035 | 0,791674013 |
| 5511 | ENSG00000160299 | -0,726443292 | 5,928206814 | 6,4140634 | 0,018564919 |
| 5512 | ENSG00000160305 | 0,150780549  | 5,296904312 | 0,7141502 | 0,406732761 |
| 5513 | ENSG00000160310 | 0,161295715  | 5,933159027 | 2,0921761 | 0,161434674 |
| 5514 | ENSG00000160321 | 0,785957618  | 5,32542764  | 7,8485552 | 0,01010609  |
| 5515 | ENSG00000160336 | -0,027620812 | 3,683770814 | 0,0414213 | 0,902025847 |
| 5516 | ENSG00000160392 | -0,212098588 | 4,555654604 | 1,092008  | 0,306833368 |
| 5517 | ENSG00000160439 | 0,107272944  | 3,739102414 | 0,2013263 | 0,657830965 |
| 5518 | ENSG00000160445 | 0,312796982  | 5,135232952 | 2,5694283 | 0,122526739 |
| 5519 | ENSG00000160539 | -0,260264253 | 5,618681745 | 1,8006327 | 0,1926711   |
| 5520 | ENSG00000160551 | 0,069201935  | 7,582775897 | 0,3664091 | 0,550845605 |
| 5521 | ENSG00000160584 | 0,078598962  | 5,44852936  | 0,1572745 | 0,695316201 |
| 5522 | ENSG00000160593 | 0,572186632  | 3,690628235 | 2,6954666 | 0,11417242  |
| 5523 | ENSG00000160613 | -0,058982806 | 4,517140468 | 0,0509041 | 0,823480607 |
| 5524 | ENSG00000160633 | 0,12993704   | 5,534072349 | 0,8012283 | 0,379942125 |
| 5525 | ENSG00000160678 | -0,334427736 | 4,417197615 | 2,166278  | 0,154553623 |
| 5526 | ENSG00000160679 | -0,109730885 | 5,854972067 | 0,99911   | 0,327840602 |
| 5527 | ENSG00000160685 | -0,146236782 | 4,160717144 | 0,5972918 | 0,447445165 |
| 5528 | ENSG00000160688 | -0,303240881 | 4,011452418 | 2,9419176 | 0,099686529 |
| 5529 | ENSG00000160691 | 0,089888301  | 5,146735048 | 0,2032778 | 0,656289376 |
| 5530 | ENSG00000160695 | 0,130998848  | 4,806776363 | 0,997315  | 0,357549614 |
| 5531 | ENSG00000160710 | 0,264775019  | 6,957739285 | 2,6469108 | 0,117309137 |
| 5532 | ENSG00000160712 | 0,421084127  | 4,415815571 | 1,6129447 | 0,216715839 |
| 5533 | ENSG00000160714 | 0,053850052  | 4,99312024  | 0,147127  | 0,704792536 |
| 5534 | ENSG00000160746 | 0,020018146  | 4,157457253 | 0,0293065 | 0,901933779 |
| 5535 | ENSG00000160752 | -0,23783458  | 4,523123342 | 3,487386  | 0,082899299 |
| 5536 | ENSG00000160785 | 0,175278219  | 4,515155273 | 0,7227221 | 0,403973332 |
| 5537 | ENSG00000160789 | 0,111568797  | 7,077420091 | 0,2087164 | 0,652040057 |
| 5538 | ENSG00000160796 | -0,080117439 | 4,180452935 | 0,1250221 | 0,72685505  |
| 5539 | ENSG00000160803 | 0,053718609  | 4,60530006  | 0,1111789 | 0,74181199  |
| 5540 | ENSG00000160808 | 0,012301831  | 6,967126111 | 0,00056   | 0,981323229 |
| 5541 | ENSG00000160818 | -0,370736434 | 4,278730062 | 4,7654434 | 0,039447398 |
| 5542 | ENSG00000160862 | 0,57644708   | 5,076530412 | 3,5917694 | 0,070641797 |
| 5543 | ENSG00000160908 | 0,033125393  | 4,419039208 | 0,0762512 | 0,889439983 |
| 5544 | ENSG00000160948 | -0,026632965 | 5,143587285 | 0,0236546 | 0,879102072 |

|      |                 |              |             |           |             |
|------|-----------------|--------------|-------------|-----------|-------------|
| 5545 | ENSG00000160953 | 0,252495082  | 4,25944202  | 2,3730988 | 0,137022292 |
| 5546 | ENSG00000160961 | 0,014465195  | 4,041050938 | 0,0085374 | 0,990940727 |
| 5547 | ENSG00000161010 | 0,41590131   | 3,714399818 | 5,445035  | 0,034785928 |
| 5548 | ENSG00000161011 | 0,435359201  | 6,851488905 | 4,4609074 | 0,045692573 |
| 5549 | ENSG00000161013 | 0,313294402  | 5,181509835 | 4,4163464 | 0,046694875 |
| 5550 | ENSG00000161016 | 0,095059294  | 8,313116357 | 0,2387642 | 0,629704409 |
| 5551 | ENSG00000161021 | 0,005455415  | 4,382655313 | 0,0007327 | 0,978638238 |
| 5552 | ENSG00000161048 | 0,209694947  | 4,474550987 | 1,4527845 | 0,240277448 |
| 5553 | ENSG00000161057 | -0,444669812 | 6,207679496 | 4,1932177 | 0,052114239 |
| 5554 | ENSG00000161202 | 0,217700882  | 5,423542397 | 1,4702671 | 0,237552426 |
| 5555 | ENSG00000161203 | -0,047834498 | 7,233901573 | 0,1320018 | 0,719655915 |
| 5556 | ENSG00000161204 | 0,040595593  | 5,040980853 | 0,079155  | 0,780945708 |
| 5557 | ENSG00000161217 | -0,004027515 | 6,657094647 | 0,0006756 | 0,9794872   |
| 5558 | ENSG00000161267 | -0,691523604 | 4,690321953 | 4,9994832 | 0,035297635 |
| 5559 | ENSG00000161281 | -0,481785452 | 8,173885849 | 3,1717129 | 0,08807255  |
| 5560 | ENSG00000161298 | 0,054177233  | 4,418874012 | 0,1166572 | 0,735774479 |
| 5561 | ENSG00000161381 | -0,568977367 | 4,239614088 | 4,2912889 | 0,049650064 |
| 5562 | ENSG00000161526 | -0,196985907 | 4,941439491 | 2,7923277 | 0,108156897 |
| 5563 | ENSG00000161533 | 0,078658756  | 6,713201854 | 0,5889554 | 0,450565652 |
| 5564 | ENSG00000161542 | -0,236806516 | 4,538113481 | 4,7884067 | 0,077470621 |
| 5565 | ENSG00000161547 | 0,028542613  | 5,99247252  | 0,0348356 | 0,853569113 |
| 5566 | ENSG00000161551 | 0,343813573  | 4,278254901 | 11,036708 | 0,024185846 |
| 5567 | ENSG00000161638 | 0,078021113  | 5,997700316 | 0,1307396 | 0,720950917 |
| 5568 | ENSG00000161647 | -0,88147099  | 5,06827869  | 7,1445657 | 0,013553906 |
| 5569 | ENSG00000161654 | -0,291369905 | 4,651359636 | 8,8194095 | 0,025611069 |
| 5570 | ENSG00000161671 | 0,399969685  | 5,356891492 | 3,781007  | 0,064105618 |
| 5571 | ENSG00000161791 | 0,713285015  | 4,877990855 | 9,756193  | 0,004755762 |
| 5572 | ENSG00000161813 | -0,193366907 | 6,696986698 | 1,0267713 | 0,321409022 |
| 5573 | ENSG00000161896 | -0,466562511 | 3,737336308 | 1,6213596 | 0,215560306 |
| 5574 | ENSG00000161904 | 0,101142462  | 4,541415183 | 0,542892  | 0,557809678 |
| 5575 | ENSG00000161940 | 0,09574712   | 3,85362039  | 0,2891214 | 0,653193163 |
| 5576 | ENSG00000161970 | -0,104371459 | 7,042979448 | 0,1176529 | 0,734694334 |
| 5577 | ENSG00000161981 | -0,543869022 | 4,686020529 | 8,1306658 | 0,009006779 |
| 5578 | ENSG00000162086 | -0,253156069 | 4,454857325 | 4,6915527 | 0,070254595 |
| 5579 | ENSG00000162104 | -0,082672405 | 5,012290682 | 0,1353411 | 0,716304866 |
| 5580 | ENSG00000162129 | -0,128999904 | 4,151593624 | 0,5167744 | 0,479426233 |
| 5581 | ENSG00000162139 | 0,22352893   | 4,256341553 | 1,7480386 | 0,199059495 |
| 5582 | ENSG00000162191 | -0,00820632  | 5,069732125 | 0,0027813 | 0,958393733 |
| 5583 | ENSG00000162231 | -0,007642804 | 5,469975162 | 0,0019204 | 0,96542274  |
| 5584 | ENSG00000162236 | 0,184419408  | 4,180061982 | 1,7396157 | 0,286154274 |
| 5585 | ENSG00000162244 | 0,172389304  | 7,618702177 | 0,7775631 | 0,386966149 |
| 5586 | ENSG00000162298 | 0,22410524   | 4,270795826 | 1,1191904 | 0,301024906 |
| 5587 | ENSG00000162337 | 0,98625955   | 4,834723492 | 11,714541 | 0,002315591 |
| 5588 | ENSG00000162368 | 0,246927363  | 6,793276178 | 1,8583781 | 0,185945444 |
| 5589 | ENSG00000162377 | -0,152828444 | 3,98407843  | 1,8379949 | 0,384303387 |
| 5590 | ENSG00000162378 | -0,041033411 | 6,986544827 | 0,0683396 | 0,796085206 |
| 5591 | ENSG00000162384 | -0,179361163 | 4,946266276 | 2,3625738 | 0,153747609 |
| 5592 | ENSG00000162390 | 0,096076451  | 5,071529532 | 0,070857  | 0,79245328  |
| 5593 | ENSG00000162402 | -0,084198466 | 7,288406313 | 0,4688548 | 0,500300329 |
| 5594 | ENSG00000162407 | -0,444180283 | 6,638906032 | 13,064058 | 0,001443245 |
| 5595 | ENSG00000162408 | -0,012658876 | 4,655407748 | 0,006267  | 0,937583427 |
| 5596 | ENSG00000162409 | 0,032694737  | 8,61093525  | 0,0059879 | 0,938985994 |
| 5597 | ENSG00000162413 | -0,186111386 | 5,926276646 | 0,5904352 | 0,450031293 |
| 5598 | ENSG00000162430 | -0,097332855 | 4,620175443 | 0,1843289 | 0,671654828 |
| 5599 | ENSG00000162433 | 0,106119918  | 6,707924135 | 0,4633715 | 0,502815506 |
| 5600 | ENSG00000162434 | -0,028102782 | 7,441757794 | 0,0550093 | 0,81662338  |
| 5601 | ENSG00000162437 | -0,228314398 | 5,189227551 | 3,970685  | 0,058194413 |
| 5602 | ENSG00000162441 | -0,13922771  | 5,377154106 | 1,2570587 | 0,273683068 |
| 5603 | ENSG00000162458 | -0,552186984 | 5,776066134 | 6,8119853 | 0,015620452 |



|      |                 |              |             |           |             |
|------|-----------------|--------------|-------------|-----------|-------------|
| 5604 | ENSG00000162496 | -0,382835928 | 5,639436093 | 2,4574633 | 0,130557698 |
| 5605 | ENSG00000162511 | -0,14077553  | 4,586405241 | 0,2608188 | 0,614401771 |
| 5606 | ENSG00000162512 | 0,704786628  | 4,998507238 | 5,0183403 | 0,034985211 |
| 5607 | ENSG00000162517 | -0,001310415 | 4,874176881 | 6,536E-05 | 0,993618692 |
| 5608 | ENSG00000162521 | 0,152361217  | 5,956400902 | 1,8117708 | 0,191305704 |
| 5609 | ENSG00000162576 | 0,807664764  | 4,714523554 | 9,9598968 | 0,004402231 |
| 5610 | ENSG00000162599 | -0,047402593 | 8,762897984 | 0,1185167 | 0,733750647 |
| 5611 | ENSG00000162600 | -0,015615421 | 5,078108121 | 0,0050261 | 0,944091124 |
| 5612 | ENSG00000162601 | -0,172182701 | 6,264724625 | 1,5559729 | 0,224708373 |
| 5613 | ENSG00000162604 | -0,079438629 | 4,841901253 | 0,3083296 | 0,584034384 |
| 5614 | ENSG00000162607 | 0,076154857  | 5,206342621 | 0,2227608 | 0,641369829 |
| 5615 | ENSG00000162613 | -0,062945589 | 6,715584185 | 0,1583756 | 0,694308527 |
| 5616 | ENSG00000162614 | 0,11153246   | 8,268962586 | 0,1471773 | 0,704753898 |
| 5617 | ENSG00000162616 | -0,04243707  | 6,655455973 | 0,0202617 | 0,888042117 |
| 5618 | ENSG00000162618 | -0,409761447 | 5,595675834 | 3,7165437 | 0,066251384 |
| 5619 | ENSG00000162623 | -0,03902973  | 5,130147938 | 0,0389616 | 0,845250409 |
| 5620 | ENSG00000162627 | -0,233939286 | 4,580678456 | 1,9967855 | 0,170959363 |
| 5621 | ENSG00000162630 | -0,909623323 | 6,17924069  | 4,7199746 | 0,040315664 |
| 5622 | ENSG00000162636 | 0,649096898  | 5,05269876  | 5,09508   | 0,033745371 |
| 5623 | ENSG00000162642 | -0,125990037 | 3,881323682 | 0,9607523 | 0,494427882 |
| 5624 | ENSG00000162645 | 0,003398541  | 5,632166213 | 0,0001507 | 0,990309868 |
| 5625 | ENSG00000162654 | 0,11269243   | 5,135092641 | 0,1129396 | 0,739853728 |
| 5626 | ENSG00000162664 | -0,061098108 | 5,196151215 | 0,1971378 | 0,661159532 |
| 5627 | ENSG00000162669 | 0,1667287    | 3,822324582 | 0,2469375 | 0,623933667 |
| 5628 | ENSG00000162687 | 2,56328796   | 5,20901039  | 8,9032623 | 0,006615049 |
| 5629 | ENSG00000162688 | -0,299117916 | 7,096328047 | 1,6202662 | 0,215710018 |
| 5630 | ENSG00000162692 | 0,121991116  | 5,482032216 | 0,1091234 | 0,744120079 |
| 5631 | ENSG00000162694 | 0,056098661  | 4,381836362 | 0,0828516 | 0,776034749 |
| 5632 | ENSG00000162695 | 0,256650103  | 5,112227919 | 1,3002377 | 0,265848612 |
| 5633 | ENSG00000162702 | 0,034673689  | 4,383493225 | 0,0546155 | 0,817273936 |
| 5634 | ENSG00000162704 | 0,142266258  | 6,108844875 | 0,4118972 | 0,527322525 |
| 5635 | ENSG00000162714 | 0,300291915  | 4,311571597 | 2,9378644 | 0,099906777 |
| 5636 | ENSG00000162733 | -0,058727913 | 7,909212474 | 0,0932214 | 0,762853846 |
| 5637 | ENSG00000162734 | 0,046837345  | 7,063062993 | 0,0724877 | 0,790137409 |
| 5638 | ENSG00000162735 | -0,021305523 | 5,83594661  | 0,0175997 | 0,895607379 |
| 5639 | ENSG00000162736 | 0,084172086  | 5,8092867   | 0,341609  | 0,564553039 |
| 5640 | ENSG00000162772 | 0,877072055  | 5,18596136  | 1,7040379 | 0,204606605 |
| 5641 | ENSG00000162775 | 0,007468643  | 4,70470026  | 0,003683  | 0,962652572 |
| 5642 | ENSG00000162783 | 0,299001471  | 4,952962125 | 2,3015928 | 0,142801076 |
| 5643 | ENSG00000162804 | 0,18337302   | 4,077673854 | 0,2805987 | 0,601360964 |
| 5644 | ENSG00000162813 | -0,04865503  | 4,197503107 | 0,1278243 | 0,75560883  |
| 5645 | ENSG00000162817 | -0,474265907 | 5,053414859 | 4,7866174 | 0,039050252 |
| 5646 | ENSG00000162819 | 0,116793887  | 5,499184033 | 0,6764296 | 0,419206037 |
| 5647 | ENSG00000162825 | 0,25184846   | 5,295797841 | 2,0953048 | 0,161181177 |
| 5648 | ENSG00000162836 | -0,391102355 | 4,092396016 | 3,9480201 | 0,05890483  |
| 5649 | ENSG00000162851 | -0,138208746 | 3,638658339 | 1,0948966 | 0,49519676  |
| 5650 | ENSG00000162852 | -0,125382843 | 5,232766314 | 0,9250363 | 0,346076592 |
| 5651 | ENSG00000162869 | 0,306793589  | 4,819937547 | 8,7376532 | 0,013939417 |
| 5652 | ENSG00000162878 | -0,54142005  | 5,726212399 | 5,4776173 | 0,02825462  |
| 5653 | ENSG00000162885 | -0,325894443 | 4,607485575 | 7,0108536 | 0,014321741 |
| 5654 | ENSG00000162889 | -0,197246238 | 6,991860695 | 1,0534088 | 0,315345652 |
| 5655 | ENSG00000162909 | 0,148568873  | 7,046960204 | 1,0758763 | 0,310318769 |
| 5656 | ENSG00000162923 | -0,116459961 | 6,934859556 | 0,7655032 | 0,390582148 |
| 5657 | ENSG00000162924 | 0,543058968  | 4,503640877 | 1,9569055 | 0,175121245 |
| 5658 | ENSG00000162927 | 0,125072329  | 3,729876846 | 0,6873782 | 0,4799941   |
| 5659 | ENSG00000162928 | -0,108832086 | 5,057445751 | 0,8186113 | 0,384735    |
| 5660 | ENSG00000162929 | -0,031401794 | 3,698194237 | 0,0633986 | 0,866892744 |
| 5661 | ENSG00000162944 | 0,417841242  | 3,957699379 | 3,0744592 | 0,092785391 |
| 5662 | ENSG00000162946 | -0,006134068 | 3,650995056 | 0,0009016 | 0,976304223 |

|      |                 |              |             |           |             |
|------|-----------------|--------------|-------------|-----------|-------------|
| 5663 | ENSG00000162961 | -0,193168395 | 3,980440889 | 1,4175054 | 0,300224631 |
| 5664 | ENSG00000162971 | -0,044302465 | 3,988553015 | 0,1053141 | 0,80752969  |
| 5665 | ENSG00000162976 | 0,463087647  | 4,227183465 | 5,1361076 | 0,033102757 |
| 5666 | ENSG00000162980 | -0,019174004 | 6,358831899 | 0,0077014 | 0,930825259 |
| 5667 | ENSG00000162989 | -0,758836958 | 6,060696374 | 6,8925324 | 0,015089733 |
| 5668 | ENSG00000162999 | -0,054534471 | 3,877359726 | 0,1393575 | 0,771278053 |
| 5669 | ENSG00000163001 | 0,14378383   | 4,804290193 | 0,8652332 | 0,361892593 |
| 5670 | ENSG00000163002 | -0,062345834 | 3,629027907 | 0,1816512 | 0,763901101 |
| 5671 | ENSG00000163029 | -0,063949991 | 5,305651726 | 0,2264097 | 0,638651512 |
| 5672 | ENSG00000163032 | -0,210121988 | 5,066740146 | 0,4091114 | 0,528710309 |
| 5673 | ENSG00000163041 | -0,095427118 | 7,437169899 | 0,5390876 | 0,470169193 |
| 5674 | ENSG00000163050 | -0,534265807 | 6,989158764 | 5,4509696 | 0,028602897 |
| 5675 | ENSG00000163069 | -0,101729171 | 6,807516624 | 0,5283    | 0,474597445 |
| 5676 | ENSG00000163072 | 0,129930109  | 4,640391612 | 0,8214716 | 0,374083472 |
| 5677 | ENSG00000163092 | 0,270951449  | 8,385466042 | 0,3319604 | 0,570075521 |
| 5678 | ENSG00000163104 | -0,034841731 | 5,482603701 | 0,0449625 | 0,833931715 |
| 5679 | ENSG00000163110 | -0,208536086 | 9,889781623 | 0,5855607 | 0,451884442 |
| 5680 | ENSG00000163125 | 0,199690592  | 5,370173274 | 1,6570015 | 0,210750652 |
| 5681 | ENSG00000163131 | 0,003234828  | 5,769214532 | 0,0001183 | 0,991416383 |
| 5682 | ENSG00000163138 | 0,060369534  | 4,13860848  | 0,2300567 | 0,718815418 |
| 5683 | ENSG00000163159 | -0,062617633 | 4,0985037   | 0,2226168 | 0,684606091 |
| 5684 | ENSG00000163161 | 0,033012938  | 4,909666054 | 0,0641246 | 0,938796235 |
| 5685 | ENSG00000163162 | -0,376386041 | 5,397320009 | 2,5819058 | 0,121668352 |
| 5686 | ENSG00000163166 | -0,261069665 | 5,580034642 | 5,5734254 | 0,027008473 |
| 5687 | ENSG00000163171 | -0,080031145 | 6,360244026 | 0,2083825 | 0,652298972 |
| 5688 | ENSG00000163191 | -0,157774613 | 5,337292423 | 0,2782239 | 0,602894823 |
| 5689 | ENSG00000163214 | 0,106750361  | 4,555107356 | 1,0123486 | 0,423741239 |
| 5690 | ENSG00000163220 | -0,84508471  | 6,799886891 | 2,3531304 | 0,13860758  |
| 5691 | ENSG00000163249 | 0,695113243  | 4,481534275 | 4,4464355 | 0,04601596  |
| 5692 | ENSG00000163257 | 0,152541002  | 4,957855664 | 1,4321314 | 0,243506452 |
| 5693 | ENSG00000163281 | -0,233869519 | 5,067555981 | 1,0005505 | 0,327535188 |
| 5694 | ENSG00000163291 | -0,023776678 | 4,410416282 | 0,0164919 | 0,898926797 |
| 5695 | ENSG00000163297 | 0,091416029  | 5,913571126 | 0,4010015 | 0,532776949 |
| 5696 | ENSG00000163312 | -0,042753025 | 4,546378317 | 0,1087742 | 0,856065548 |
| 5697 | ENSG00000163319 | -0,454912955 | 3,739092411 | 6,7574434 | 0,019722558 |
| 5698 | ENSG00000163320 | -0,034521866 | 6,467890011 | 0,0577057 | 0,812272403 |
| 5699 | ENSG00000163328 | -0,288276034 | 5,040364042 | 3,6547317 | 0,068386154 |
| 5700 | ENSG00000163344 | -0,379057069 | 4,683900005 | 2,9975324 | 0,096720695 |
| 5701 | ENSG00000163346 | -0,049756181 | 6,447487545 | 0,0548013 | 0,81697098  |
| 5702 | ENSG00000163348 | 0,211694209  | 3,909926442 | 1,4888197 | 0,28740806  |
| 5703 | ENSG00000163349 | -0,062104419 | 6,666645909 | 0,2105411 | 0,650614576 |
| 5704 | ENSG00000163359 | -0,154879027 | 8,270871499 | 0,3128559 | 0,581313104 |
| 5705 | ENSG00000163374 | 0,029116942  | 5,815224131 | 0,0560648 | 0,814906199 |
| 5706 | ENSG00000163376 | -0,271759579 | 4,086403508 | 0,4565845 | 0,505929707 |
| 5707 | ENSG00000163378 | 0,28342547   | 5,634392774 | 2,1809695 | 0,15322295  |
| 5708 | ENSG00000163380 | -0,43173774  | 6,838390194 | 1,4670298 | 0,23805403  |
| 5709 | ENSG00000163382 | -0,182530335 | 5,163008589 | 2,0316928 | 0,167368443 |
| 5710 | ENSG00000163389 | 0,060503736  | 4,102951792 | 0,1193594 | 0,732854957 |
| 5711 | ENSG00000163399 | -0,320144103 | 7,178608245 | 1,7494091 | 0,198889729 |
| 5712 | ENSG00000163412 | -0,148584233 | 5,824916735 | 1,4594816 | 0,239186675 |
| 5713 | ENSG00000163428 | 0,107748691  | 5,630916401 | 0,42745   | 0,519695213 |
| 5714 | ENSG00000163430 | -0,136461559 | 8,834394369 | 0,7169325 | 0,405803921 |
| 5715 | ENSG00000163431 | -0,600470155 | 5,274959832 | 3,3479806 | 0,080216788 |
| 5716 | ENSG00000163444 | -0,126622044 | 5,040623186 | 0,7792389 | 0,386450556 |
| 5717 | ENSG00000163453 | 0,692562887  | 8,162655002 | 9,8047419 | 0,004668761 |
| 5718 | ENSG00000163466 | -0,093907536 | 6,895491167 | 0,6143377 | 0,441090487 |
| 5719 | ENSG00000163468 | -0,384142087 | 6,895647071 | 6,5786634 | 0,017263436 |
| 5720 | ENSG00000163479 | 0,138949545  | 5,757606371 | 0,5338374 | 0,472340047 |
| 5721 | ENSG00000163491 | -0,355808383 | 4,422620998 | 1,1680119 | 0,290958505 |

|      |                 |              |             |           |             |
|------|-----------------|--------------|-------------|-----------|-------------|
| 5722 | ENSG00000163492 | -0,197223191 | 8,095297654 | 0,1485603 | 0,703439502 |
| 5723 | ENSG00000163510 | 0,029272805  | 4,982239056 | 0,03275   | 0,857968971 |
| 5724 | ENSG00000163512 | -0,206892577 | 4,507198097 | 1,8004511 | 0,192692722 |
| 5725 | ENSG00000163513 | -0,345924022 | 7,946753922 | 4,9684751 | 0,035781896 |
| 5726 | ENSG00000163516 | 0,134094314  | 4,543209898 | 0,8058544 | 0,389745583 |
| 5727 | ENSG00000163517 | -0,080911062 | 4,443020388 | 0,1692351 | 0,684582209 |
| 5728 | ENSG00000163520 | 0,429765551  | 7,401517475 | 1,5590428 | 0,224305273 |
| 5729 | ENSG00000163527 | -0,011225898 | 7,10503715  | 0,0047881 | 0,945428785 |
| 5730 | ENSG00000163528 | -0,536214395 | 4,030075357 | 23,605992 | 0,001658302 |
| 5731 | ENSG00000163531 | 0,853231139  | 5,607581225 | 6,6670114 | 0,01662858  |
| 5732 | ENSG00000163539 | -0,107989031 | 6,857566245 | 0,4228409 | 0,521934578 |
| 5733 | ENSG00000163541 | -0,47855015  | 7,231499964 | 7,9656553 | 0,009632769 |
| 5734 | ENSG00000163558 | 0,477599334  | 5,231551249 | 3,5039168 | 0,073932806 |
| 5735 | ENSG00000163563 | 0,364485306  | 3,876139954 | 0,6502879 | 0,428229719 |
| 5736 | ENSG00000163565 | -0,417705508 | 6,342624602 | 3,5537851 | 0,072043695 |
| 5737 | ENSG00000163577 | 0,063168348  | 3,868890439 | 0,1369063 | 0,71474503  |
| 5738 | ENSG00000163590 | -0,781036728 | 5,877843417 | 19,710322 | 0,000186314 |
| 5739 | ENSG00000163596 | -0,002028115 | 4,347169516 | 0,0001874 | 0,989194117 |
| 5740 | ENSG00000163597 | -0,115767507 | 5,750609561 | 0,9056951 | 0,351072052 |
| 5741 | ENSG00000163602 | 0,197409813  | 5,095252895 | 1,5918177 | 0,219651455 |
| 5742 | ENSG00000163605 | -0,141971026 | 6,409316368 | 0,5153645 | 0,480019743 |
| 5743 | ENSG00000163607 | -0,407671731 | 4,015197791 | 6,0543694 | 0,021763793 |
| 5744 | ENSG00000163608 | -0,085168166 | 5,538000408 | 0,6644703 | 0,476720005 |
| 5745 | ENSG00000163618 | -0,483454497 | 6,473836343 | 1,4687704 | 0,237784162 |
| 5746 | ENSG00000163625 | 0,039186697  | 6,967443322 | 0,0806696 | 0,778912158 |
| 5747 | ENSG00000163626 | -0,108928128 | 4,288676841 | 0,5960411 | 0,467512204 |
| 5748 | ENSG00000163629 | 0,87996711   | 5,730330852 | 5,2104955 | 0,031972261 |
| 5749 | ENSG00000163634 | -0,39150085  | 5,256350025 | 3,5606245 | 0,07178894  |
| 5750 | ENSG00000163636 | -0,303943418 | 6,101531129 | 3,9445863 | 0,059006809 |
| 5751 | ENSG00000163637 | 0,028311538  | 5,232184929 | 0,018686  | 0,892454099 |
| 5752 | ENSG00000163638 | -1,290784327 | 6,375228105 | 6,7412453 | 0,016103643 |
| 5753 | ENSG00000163644 | -0,216421552 | 8,44421308  | 0,2599446 | 0,61499242  |
| 5754 | ENSG00000163655 | 0,132972745  | 5,569897229 | 1,4639192 | 0,238495036 |
| 5755 | ENSG00000163659 | 0,08417805   | 5,97165411  | 0,1176453 | 0,734702569 |
| 5756 | ENSG00000163660 | -0,156147406 | 6,753635674 | 0,3969127 | 0,534867382 |
| 5757 | ENSG00000163681 | -0,052954853 | 8,434443639 | 0,0291548 | 0,865908096 |
| 5758 | ENSG00000163682 | 0,348562841  | 8,877404114 | 2,4646364 | 0,130024906 |
| 5759 | ENSG00000163683 | 0,232078502  | 5,607986859 | 1,5656224 | 0,223361114 |
| 5760 | ENSG00000163684 | -0,030825114 | 4,734460398 | 0,043599  | 0,836430155 |
| 5761 | ENSG00000163697 | 0,116472522  | 6,334061459 | 0,8472474 | 0,366807229 |
| 5762 | ENSG00000163703 | -0,068618735 | 5,133323592 | 0,1207098 | 0,731409849 |
| 5763 | ENSG00000163710 | 0,213447927  | 6,734237348 | 1,2618951 | 0,272825803 |
| 5764 | ENSG00000163714 | -0,139029194 | 6,827241383 | 0,8457962 | 0,367240605 |
| 5765 | ENSG00000163719 | -0,017578794 | 5,130234168 | 0,0140416 | 0,906697557 |
| 5766 | ENSG00000163728 | -0,015382117 | 5,626165017 | 0,0096007 | 0,922790313 |
| 5767 | ENSG00000163738 | 0,061125265  | 4,386221892 | 0,1059308 | 0,747753437 |
| 5768 | ENSG00000163743 | -0,113948822 | 5,275551463 | 0,4788597 | 0,495832899 |
| 5769 | ENSG00000163754 | -0,287883696 | 6,588664856 | 3,1288545 | 0,090114487 |
| 5770 | ENSG00000163755 | 0,040704504  | 3,972657066 | 0,0971727 | 0,758034167 |
| 5771 | ENSG00000163762 | -0,531151665 | 4,059176894 | 3,2120364 | 0,086200016 |
| 5772 | ENSG00000163781 | -0,092520362 | 5,029460081 | 0,5672255 | 0,510615446 |
| 5773 | ENSG00000163785 | 0,019265762  | 6,102345915 | 0,0306171 | 0,862615781 |
| 5774 | ENSG00000163788 | 0,206071412  | 5,610780345 | 2,6092489 | 0,119764779 |
| 5775 | ENSG00000163798 | 0,016961597  | 4,817355021 | 0,0235344 | 0,879402553 |
| 5776 | ENSG00000163807 | -0,015525993 | 5,814122468 | 0,0133931 | 0,908863792 |
| 5777 | ENSG00000163811 | -0,042570885 | 5,309624467 | 0,0693151 | 0,794669497 |
| 5778 | ENSG00000163812 | 0,134710186  | 5,501908033 | 1,4908046 | 0,234358808 |
| 5779 | ENSG00000163818 | 0,442989351  | 4,161059863 | 4,3083395 | 0,049235229 |
| 5780 | ENSG00000163820 | 0,131335794  | 7,38719873  | 0,2734885 | 0,605978821 |

|      |                 |              |             |           |             |
|------|-----------------|--------------|-------------|-----------|-------------|
| 5781 | ENSG00000163827 | -0,177705555 | 5,607748879 | 0,1400447 | 0,711647862 |
| 5782 | ENSG00000163833 | 0,019182661  | 8,106942425 | 0,0034116 | 0,953924915 |
| 5783 | ENSG00000163840 | 0,216807036  | 5,242379209 | 0,8022424 | 0,379657662 |
| 5784 | ENSG00000163848 | -0,08312353  | 6,720548881 | 0,2148714 | 0,647311432 |
| 5785 | ENSG00000163864 | -0,249628761 | 4,037502865 | 2,2092226 | 0,150702387 |
| 5786 | ENSG00000163866 | -0,578953103 | 4,928536223 | 23,815402 | 6,14699E-05 |
| 5787 | ENSG00000163867 | -0,101641694 | 4,389895515 | 0,4113135 | 0,549673807 |
| 5788 | ENSG00000163872 | 0,145936548  | 4,809831989 | 1,2218049 | 0,28091421  |
| 5789 | ENSG00000163875 | 0,146281096  | 4,863269424 | 1,8645159 | 0,187087025 |
| 5790 | ENSG00000163877 | 0,129965176  | 3,86518424  | 0,9488244 | 0,460013483 |
| 5791 | ENSG00000163900 | -0,004816381 | 4,113924678 | 0,0019326 | 0,965311865 |
| 5792 | ENSG00000163902 | -0,062099417 | 6,930265131 | 0,184961  | 0,671115606 |
| 5793 | ENSG00000163904 | 0,064333616  | 5,220474597 | 0,5716829 | 0,561395572 |
| 5794 | ENSG00000163909 | 0,300738326  | 5,178894818 | 1,1817731 | 0,288202643 |
| 5795 | ENSG00000163913 | 0,316548438  | 4,78864927  | 2,7870134 | 0,108521687 |
| 5796 | ENSG00000163930 | 0,088903624  | 5,035580562 | 0,323368  | 0,575074914 |
| 5797 | ENSG00000163931 | 0,290293966  | 5,192944569 | 0,5849978 | 0,452099265 |
| 5798 | ENSG00000163932 | -0,096620601 | 4,265437005 | 0,1590264 | 0,69371485  |
| 5799 | ENSG00000163935 | -0,016470621 | 4,334040263 | 0,0133024 | 0,90917287  |
| 5800 | ENSG00000163938 | -0,258194337 | 5,584927078 | 2,2740225 | 0,145106466 |
| 5801 | ENSG00000163939 | -0,016269136 | 6,492890683 | 0,0198298 | 0,889229353 |
| 5802 | ENSG00000163946 | 0,122763236  | 6,534363332 | 0,6828595 | 0,417037326 |
| 5803 | ENSG00000163947 | -0,094198456 | 4,849507785 | 0,2167647 | 0,645873555 |
| 5804 | ENSG00000163950 | 0,141002426  | 3,942005159 | 0,9683407 | 0,395670981 |
| 5805 | ENSG00000163956 | -0,060453258 | 6,962469333 | 0,1168829 | 0,735529168 |
| 5806 | ENSG00000163960 | 0,2039474    | 5,793228624 | 2,0180131 | 0,168765472 |
| 5807 | ENSG00000163961 | -0,058850508 | 5,048560668 | 0,262012  | 0,619176328 |
| 5808 | ENSG00000163964 | -0,184933391 | 3,874532961 | 2,6235459 | 0,314065077 |
| 5809 | ENSG00000164022 | -0,162725861 | 5,648734276 | 0,8946396 | 0,354007312 |
| 5810 | ENSG00000164023 | 0,439442818  | 5,81058106  | 1,6947097 | 0,205807169 |
| 5811 | ENSG00000164024 | -0,249757915 | 5,205181178 | 4,8350884 | 0,038120768 |
| 5812 | ENSG00000164031 | -0,029794637 | 6,066895084 | 0,015807  | 0,901036263 |
| 5813 | ENSG00000164032 | -0,542535281 | 5,380497917 | 7,9443396 | 0,009717075 |
| 5814 | ENSG00000164035 | -0,38781777  | 5,976930242 | 2,5367142 | 0,124811392 |
| 5815 | ENSG00000164038 | -0,023311754 | 3,996574225 | 0,0160779 | 0,900196369 |
| 5816 | ENSG00000164039 | 0,261829046  | 5,129781164 | 1,8267491 | 0,189592868 |
| 5817 | ENSG00000164040 | 0,039881444  | 5,677412357 | 0,0725507 | 0,790047008 |
| 5818 | ENSG00000164048 | -0,275806589 | 3,925420106 | 2,4064239 | 0,134424315 |
| 5819 | ENSG00000164050 | 0,142776458  | 5,026878847 | 0,4777434 | 0,496330524 |
| 5820 | ENSG00000164054 | 0,156451637  | 5,281515393 | 0,5837736 | 0,452566967 |
| 5821 | ENSG00000164056 | -0,041691367 | 5,423702268 | 0,0325152 | 0,858473258 |
| 5822 | ENSG00000164062 | -0,137669739 | 5,438140316 | 0,5746378 | 0,456082194 |
| 5823 | ENSG00000164066 | 0,06251918   | 5,19457931  | 0,1546328 | 0,697750568 |
| 5824 | ENSG00000164068 | 0,050161939  | 4,271262003 | 0,0415211 | 0,840318739 |
| 5825 | ENSG00000164070 | 0,145970183  | 4,881826972 | 0,4589586 | 0,50483652  |
| 5826 | ENSG00000164073 | -0,052223648 | 4,384313375 | 0,1720705 | 0,792962902 |
| 5827 | ENSG00000164074 | 0,241905673  | 4,521065563 | 1,1515245 | 0,294306846 |
| 5828 | ENSG00000164080 | 0,122908684  | 4,877862771 | 0,3724795 | 0,547610492 |
| 5829 | ENSG00000164081 | -0,222078856 | 4,389048564 | 1,5473876 | 0,225990151 |
| 5830 | ENSG00000164091 | 0,067255253  | 6,431234298 | 0,3047845 | 0,586179298 |
| 5831 | ENSG00000164093 | -0,96491033  | 3,995726357 | 15,414118 | 0,000670912 |
| 5832 | ENSG00000164096 | -0,046587006 | 6,591238974 | 0,0655094 | 0,800255222 |
| 5833 | ENSG00000164104 | -0,051914231 | 5,309340989 | 0,0486057 | 0,827443239 |
| 5834 | ENSG00000164107 | -0,068455807 | 4,957317965 | 0,2244019 | 0,640142184 |
| 5835 | ENSG00000164111 | 0,222558538  | 7,545465293 | 0,9511516 | 0,339524024 |
| 5836 | ENSG00000164114 | 0,016596998  | 4,46337247  | 0,0061033 | 0,938401992 |
| 5837 | ENSG00000164116 | 0,420787302  | 6,302956005 | 3,4893158 | 0,07449661  |
| 5838 | ENSG00000164117 | 0,082704838  | 4,796553527 | 0,2482966 | 0,62298569  |
| 5839 | ENSG00000164118 | -0,09895225  | 4,966283476 | 0,3567807 | 0,556106725 |

|      |                 |              |             |           |             |
|------|-----------------|--------------|-------------|-----------|-------------|
| 5840 | ENSG00000164124 | 0,095428375  | 4,623045297 | 0,1631418 | 0,689993127 |
| 5841 | ENSG00000164125 | -0,18537348  | 6,918620765 | 1,7086615 | 0,203978577 |
| 5842 | ENSG00000164134 | -0,246439376 | 5,995036283 | 2,655531  | 0,11674496  |
| 5843 | ENSG00000164142 | -0,447327864 | 4,927545522 | 4,5225094 | 0,044344397 |
| 5844 | ENSG00000164144 | 0,062817971  | 4,728974227 | 0,1499973 | 0,702081315 |
| 5845 | ENSG00000164151 | 0,035460023  | 6,147412856 | 0,1408734 | 0,710824777 |
| 5846 | ENSG00000164163 | -0,152658524 | 5,887735514 | 0,4950155 | 0,488726299 |
| 5847 | ENSG00000164164 | 0,090063432  | 5,975163587 | 0,2280485 | 0,637459698 |
| 5848 | ENSG00000164168 | -0,073689231 | 5,239422473 | 0,5225758 | 0,565503214 |
| 5849 | ENSG00000164169 | 0,241126585  | 4,232829126 | 1,5923088 | 0,219582652 |
| 5850 | ENSG00000164172 | -0,290391118 | 5,640451701 | 3,9423406 | 0,059056355 |
| 5851 | ENSG00000164176 | 0,199819475  | 5,299832492 | 0,191288  | 0,665906295 |
| 5852 | ENSG00000164180 | -0,188376737 | 4,900543598 | 1,0657279 | 0,312594375 |
| 5853 | ENSG00000164182 | -0,35103923  | 4,091249232 | 3,3811959 | 0,078828451 |
| 5854 | ENSG00000164187 | -0,293007088 | 5,97359962  | 1,3814052 | 0,251827986 |
| 5855 | ENSG00000164190 | 0,102630379  | 7,012500455 | 1,0582285 | 0,314228529 |
| 5856 | ENSG00000164197 | 0,205298617  | 5,150486809 | 1,4282181 | 0,244174542 |
| 5857 | ENSG00000164209 | -0,216946479 | 6,265497846 | 1,110923  | 0,302775697 |
| 5858 | ENSG00000164211 | -0,044596375 | 4,682272374 | 0,0231758 | 0,880322009 |
| 5859 | ENSG00000164219 | -0,138174578 | 5,43094485  | 0,6309568 | 0,435085171 |
| 5860 | ENSG00000164236 | 0,142786132  | 3,859255701 | 0,2127266 | 0,648949689 |
| 5861 | ENSG00000164237 | -0,1459318   | 4,866147312 | 0,7624413 | 0,391547416 |
| 5862 | ENSG00000164244 | 0,192124782  | 5,589181033 | 1,3057976 | 0,264856322 |
| 5863 | ENSG00000164252 | -0,000422847 | 4,150178927 | 4,732E-06 | 0,99828308  |
| 5864 | ENSG00000164253 | -0,066979674 | 5,373435799 | 0,2566831 | 0,617190725 |
| 5865 | ENSG00000164258 | -0,527123618 | 6,144661099 | 4,321766  | 0,048911322 |
| 5866 | ENSG00000164270 | -1,058073004 | 4,091177908 | 29,519874 | 1,57726E-05 |
| 5867 | ENSG00000164284 | -0,05492702  | 4,206537051 | 0,1896738 | 0,787341742 |
| 5868 | ENSG00000164292 | 0,062229887  | 7,386888626 | 0,1787372 | 0,676354648 |
| 5869 | ENSG00000164294 | 0,611235744  | 4,756873829 | 9,3045384 | 0,005656192 |
| 5870 | ENSG00000164300 | 0,116812582  | 4,861125323 | 0,5944492 | 0,448514398 |
| 5871 | ENSG00000164305 | -0,001230646 | 4,643052985 | 2,071E-05 | 0,99640813  |
| 5872 | ENSG00000164306 | 0,066691491  | 3,867789202 | 0,185398  | 0,670763413 |
| 5873 | ENSG00000164307 | 0,179894403  | 6,208977899 | 1,2321605 | 0,278402911 |
| 5874 | ENSG00000164309 | -0,068965466 | 11,8174728  | 0,0250447 | 0,875630321 |
| 5875 | ENSG00000164318 | -0,730915709 | 3,850598318 | 10,086309 | 0,004197409 |
| 5876 | ENSG00000164323 | 0,082473183  | 5,475568688 | 0,1883163 | 0,668345538 |
| 5877 | ENSG00000164327 | 0,070538585  | 7,220641544 | 0,0774386 | 0,783273349 |
| 5878 | ENSG00000164329 | 0,022097171  | 5,765136392 | 0,0260401 | 0,873200367 |
| 5879 | ENSG00000164330 | 0,141535112  | 5,377656921 | 0,2068392 | 0,653499127 |
| 5880 | ENSG00000164331 | -0,006297698 | 3,938123879 | 0,0014648 | 0,99029627  |
| 5881 | ENSG00000164332 | -0,102791334 | 4,32937693  | 0,5371821 | 0,609427311 |
| 5882 | ENSG00000164338 | -0,347809239 | 4,124019797 | 5,9507669 | 0,034151184 |
| 5883 | ENSG00000164346 | -0,05482679  | 5,794290675 | 0,0656422 | 0,800057321 |
| 5884 | ENSG00000164347 | -0,355615602 | 5,516638373 | 1,8830536 | 0,183159538 |
| 5885 | ENSG00000164366 | -0,033138175 | 4,499174632 | 0,0697437 | 0,794042692 |
| 5886 | ENSG00000164402 | 0,30700641   | 5,016359802 | 4,5171247 | 0,044444545 |
| 5887 | ENSG00000164405 | -0,343918112 | 7,223793847 | 2,0087523 | 0,169734022 |
| 5888 | ENSG00000164418 | 0,041353548  | 4,403253833 | 0,0165444 | 0,89876698  |
| 5889 | ENSG00000164440 | -0,018775584 | 6,926571637 | 0,003726  | 0,951851475 |
| 5890 | ENSG00000164442 | 0,081848483  | 5,257454219 | 0,3902023 | 0,538290093 |
| 5891 | ENSG00000164463 | -0,004945699 | 6,566775473 | 0,0005063 | 0,982240887 |
| 5892 | ENSG00000164466 | -0,135159945 | 4,898590519 | 1,0322448 | 0,320113954 |
| 5893 | ENSG00000164494 | -0,118744962 | 4,358937686 | 1,2859705 | 0,412175272 |
| 5894 | ENSG00000164506 | 0,04935363   | 5,490987739 | 0,0844782 | 0,773910044 |
| 5895 | ENSG00000164530 | 0,084542497  | 5,634250327 | 0,0504735 | 0,82421565  |
| 5896 | ENSG00000164532 | 0,367043251  | 5,185598839 | 1,4052136 | 0,247897615 |
| 5897 | ENSG00000164543 | 0,168876809  | 4,902751096 | 1,2886952 | 0,267924185 |
| 5898 | ENSG00000164548 | 0,114638207  | 5,357232613 | 0,7633667 | 0,391233641 |

|      |                 |              |             |           |             |
|------|-----------------|--------------|-------------|-----------|-------------|
| 5899 | ENSG00000164574 | 0,153076776  | 4,933377101 | 0,7146137 | 0,406582832 |
| 5900 | ENSG00000164576 | 0,16787516   | 5,148486212 | 1,9446652 | 0,176377447 |
| 5901 | ENSG00000164587 | 0,265858251  | 8,189291154 | 1,6443534 | 0,212441921 |
| 5902 | ENSG00000164588 | -0,265691236 | 3,913126111 | 0,5099982 | 0,482290089 |
| 5903 | ENSG00000164597 | -0,364723029 | 6,128609459 | 5,1613831 | 0,032713693 |
| 5904 | ENSG00000164603 | -0,05986215  | 5,139730777 | 0,0473328 | 0,829680401 |
| 5905 | ENSG00000164609 | 0,081281688  | 5,792554885 | 0,3959336 | 0,535345939 |
| 5906 | ENSG00000164610 | -0,190053948 | 3,826182576 | 1,8760831 | 0,307063392 |
| 5907 | ENSG00000164615 | 0,209391024  | 4,590702196 | 1,4935261 | 0,233987779 |
| 5908 | ENSG00000164631 | 0,040934052  | 5,509970637 | 0,1287493 | 0,722977959 |
| 5909 | ENSG00000164649 | -0,028761827 | 4,858059134 | 0,0238777 | 0,878538005 |
| 5910 | ENSG00000164654 | -0,139790795 | 4,993915643 | 1,0807627 | 0,309247005 |
| 5911 | ENSG00000164659 | 0,218947106  | 4,150976587 | 1,4141925 | 0,246435843 |
| 5912 | ENSG00000164684 | 0,598857485  | 6,632273928 | 9,5514496 | 0,005142771 |
| 5913 | ENSG00000164687 | -1,085663951 | 5,649631047 | 21,572261 | 0,000111621 |
| 5914 | ENSG00000164692 | 0,598006615  | 8,758110277 | 2,5972768 | 0,120620621 |
| 5915 | ENSG00000164713 | -0,160801625 | 5,122705275 | 0,9750704 | 0,333644122 |
| 5916 | ENSG00000164715 | 0,295797362  | 5,983631708 | 1,7045204 | 0,204544744 |
| 5917 | ENSG00000164733 | -0,535950374 | 9,133541075 | 8,5931508 | 0,00746179  |
| 5918 | ENSG00000164741 | -0,361199663 | 6,59846982  | 5,325674  | 0,030306082 |
| 5919 | ENSG00000164742 | -0,434914964 | 4,181833962 | 2,5263059 | 0,125548781 |
| 5920 | ENSG00000164751 | -0,149898056 | 5,293784949 | 0,7106991 | 0,407851797 |
| 5921 | ENSG00000164754 | -0,020628749 | 7,122184893 | 0,0325178 | 0,8584622   |
| 5922 | ENSG00000164808 | 0,014557828  | 5,267203313 | 0,00812   | 0,928975149 |
| 5923 | ENSG00000164815 | 0,089376387  | 3,795845736 | 0,3506236 | 0,587568702 |
| 5924 | ENSG00000164823 | 0,434736869  | 4,627528208 | 7,2049556 | 0,013212142 |
| 5925 | ENSG00000164828 | 0,050899183  | 6,782139366 | 0,0982399 | 0,756763234 |
| 5926 | ENSG00000164830 | -0,133150509 | 6,211213478 | 0,3839745 | 0,541544906 |
| 5927 | ENSG00000164880 | 0,23238925   | 4,749593249 | 1,4798694 | 0,236072458 |
| 5928 | ENSG00000164889 | 0,261041111  | 4,450579201 | 1,1594595 | 0,292688976 |
| 5929 | ENSG00000164896 | -0,089474871 | 5,046574731 | 0,2055582 | 0,654499379 |
| 5930 | ENSG00000164902 | -0,116772599 | 4,913830394 | 0,8628928 | 0,442796853 |
| 5931 | ENSG00000164904 | 0,015753579  | 5,294317185 | 0,0155863 | 0,901722005 |
| 5932 | ENSG00000164916 | 0,336806146  | 4,918318091 | 1,5727954 | 0,222337509 |
| 5933 | ENSG00000164919 | -0,906237628 | 7,964690747 | 9,600439  | 0,005047119 |
| 5934 | ENSG00000164924 | 0,031446801  | 8,071593702 | 0,0457532 | 0,832494363 |
| 5935 | ENSG00000164930 | 0,089805766  | 4,812597573 | 0,3799248 | 0,543665366 |
| 5936 | ENSG00000164934 | -0,318729482 | 5,000633721 | 2,14781   | 0,156246106 |
| 5937 | ENSG00000164938 | 0,207699634  | 5,652701587 | 1,0062544 | 0,326188905 |
| 5938 | ENSG00000164941 | -0,099108465 | 5,187060991 | 0,5469508 | 0,466986162 |
| 5939 | ENSG00000164944 | 0,14701908   | 6,142606311 | 0,7486678 | 0,395790738 |
| 5940 | ENSG00000164946 | 0,337671219  | 4,768309631 | 2,138741  | 0,157085377 |
| 5941 | ENSG00000164949 | 0,638122045  | 5,499715268 | 2,9751572 | 0,097901435 |
| 5942 | ENSG00000164951 | -0,076512957 | 6,5831389   | 0,0812281 | 0,778178218 |
| 5943 | ENSG00000164953 | -0,583437301 | 5,532283734 | 5,4910734 | 0,028080553 |
| 5944 | ENSG00000164961 | 0,077239395  | 5,293952097 | 0,677304  | 0,418898153 |
| 5945 | ENSG00000164970 | -0,04695457  | 4,355720569 | 0,0732675 | 0,789039872 |
| 5946 | ENSG00000164975 | -0,154079723 | 5,417719007 | 1,5249813 | 0,229231535 |
| 5947 | ENSG00000164978 | -0,168938703 | 3,839027457 | 0,5247348 | 0,476098297 |
| 5948 | ENSG00000164983 | -0,141858014 | 5,907181704 | 0,4842752 | 0,493431008 |
| 5949 | ENSG00000164985 | 0,132105378  | 6,04748861  | 1,3300269 | 0,260547223 |
| 5950 | ENSG00000164989 | 0,329861612  | 3,870931978 | 3,1840105 | 0,087496547 |
| 5951 | ENSG00000165006 | -0,189332492 | 5,399301425 | 2,289003  | 0,143801389 |
| 5952 | ENSG00000165025 | 0,129999674  | 3,909970415 | 0,2697029 | 0,608468969 |
| 5953 | ENSG00000165028 | -0,550019867 | 4,76309653  | 5,991922  | 0,022379315 |
| 5954 | ENSG00000165029 | -0,399188076 | 6,716836663 | 2,2533465 | 0,146864553 |
| 5955 | ENSG00000165030 | -0,580131706 | 5,233855122 | 4,624637  | 0,042206887 |
| 5956 | ENSG00000165055 | -0,063050225 | 4,256146784 | 0,2456118 | 0,624845205 |
| 5957 | ENSG00000165060 | -0,411513869 | 3,855027982 | 4,95607   | 0,036028866 |

|      |                 |              |             |           |             |
|------|-----------------|--------------|-------------|-----------|-------------|
| 5958 | ENSG00000165071 | 0,673322089  | 5,39893906  | 3,8617569 | 0,061528537 |
| 5959 | ENSG00000165072 | -0,626662784 | 5,100380172 | 6,1523892 | 0,020835255 |
| 5960 | ENSG00000165092 | 0,118735292  | 5,992046565 | 0,1118174 | 0,741099887 |
| 5961 | ENSG00000165097 | 0,218647069  | 4,212173424 | 2,4978371 | 0,150759159 |
| 5962 | ENSG00000165102 | 0,261758255  | 5,638937064 | 2,3100472 | 0,142102909 |
| 5963 | ENSG00000165113 | -0,194128041 | 4,021152226 | 1,8280421 | 0,256391656 |
| 5964 | ENSG00000165115 | -0,137307245 | 3,812228399 | 1,2880821 | 0,448117913 |
| 5965 | ENSG00000165119 | 0,104545114  | 8,137749553 | 0,9960848 | 0,328558837 |
| 5966 | ENSG00000165121 | -0,03638213  | 3,782287265 | 0,0835258 | 0,857122564 |
| 5967 | ENSG00000165124 | 0,488633854  | 6,887874564 | 1,9527709 | 0,175559744 |
| 5968 | ENSG00000165152 | -0,071006716 | 5,510406277 | 0,1028491 | 0,751318657 |
| 5969 | ENSG00000165156 | 0,06409667   | 5,988220149 | 0,1106743 | 0,742376383 |
| 5970 | ENSG00000165168 | -0,345601088 | 5,973735527 | 1,1901474 | 0,286542579 |
| 5971 | ENSG00000165169 | 0,004758347  | 5,05607503  | 0,000293  | 0,986490053 |
| 5972 | ENSG00000165181 | 0,050814895  | 3,695542402 | 0,0411354 | 0,841051536 |
| 5973 | ENSG00000165192 | -0,495985544 | 5,48176341  | 1,4210584 | 0,24532553  |
| 5974 | ENSG00000165195 | -0,400602526 | 3,707887526 | 4,3734233 | 0,047687366 |
| 5975 | ENSG00000165209 | -0,177591166 | 4,839937217 | 1,9437105 | 0,176479501 |
| 5976 | ENSG00000165219 | 0,033831207  | 6,127986594 | 0,0731756 | 0,789160647 |
| 5977 | ENSG00000165238 | -0,025914219 | 6,195151087 | 0,0062498 | 0,937668782 |
| 5978 | ENSG00000165240 | 0,20347076   | 4,908708127 | 2,7339788 | 0,111707263 |
| 5979 | ENSG00000165264 | -0,821157815 | 5,87231361  | 10,935741 | 0,00306461  |
| 5980 | ENSG00000165269 | 0,210853463  | 5,894167519 | 0,435801  | 0,515681684 |
| 5981 | ENSG00000165271 | -0,081774444 | 4,455257995 | 0,1832516 | 0,672556262 |
| 5982 | ENSG00000165280 | 0,025058552  | 7,833959503 | 0,032523  | 0,858451046 |
| 5983 | ENSG00000165282 | -0,13350016  | 3,662747177 | 0,460458  | 0,504148211 |
| 5984 | ENSG00000165283 | -0,326097645 | 5,531131003 | 4,9135977 | 0,036740366 |
| 5985 | ENSG00000165288 | 0,074559406  | 5,098560198 | 0,2766192 | 0,603926456 |
| 5986 | ENSG00000165312 | -0,025357786 | 5,267508582 | 0,0044529 | 0,947370336 |
| 5987 | ENSG00000165322 | 0,057779486  | 6,055398941 | 0,1159964 | 0,736494182 |
| 5988 | ENSG00000165338 | 0,192053     | 5,144841568 | 1,1732056 | 0,28991429  |
| 5989 | ENSG00000165355 | 0,283098923  | 4,302362299 | 1,6572113 | 0,210722735 |
| 5990 | ENSG00000165359 | -0,227341109 | 5,382478062 | 1,5333604 | 0,2280392   |
| 5991 | ENSG00000165389 | -0,44559635  | 4,512511003 | 8,5773081 | 0,007524603 |
| 5992 | ENSG00000165392 | 0,057069271  | 5,010152912 | 0,2572659 | 0,616793636 |
| 5993 | ENSG00000165406 | -0,004868881 | 5,374025634 | 0,0013009 | 0,971536946 |
| 5994 | ENSG00000165410 | -0,330026043 | 8,251075127 | 0,8710837 | 0,360303918 |
| 5995 | ENSG00000165416 | 0,044240223  | 6,785485085 | 0,1232217 | 0,728734763 |
| 5996 | ENSG00000165417 | 0,13901046   | 5,517287787 | 1,0705517 | 0,311488961 |
| 5997 | ENSG00000165424 | 0,302960526  | 5,732478183 | 2,9221505 | 0,100766029 |
| 5998 | ENSG00000165434 | -0,269494425 | 3,63936462  | 0,9631176 | 0,336564518 |
| 5999 | ENSG00000165457 | -0,274660297 | 4,261219394 | 1,4963556 | 0,23355878  |
| 6000 | ENSG00000165458 | 0,123035682  | 5,746599587 | 0,3470811 | 0,561484813 |
| 6001 | ENSG00000165475 | 0,149611416  | 4,071470447 | 1,1939938 | 0,391539952 |
| 6002 | ENSG00000165476 | 0,131033687  | 5,45109316  | 0,4518855 | 0,508105806 |
| 6003 | ENSG00000165487 | -0,434657157 | 5,902144018 | 7,4020173 | 0,012161515 |
| 6004 | ENSG00000165494 | 0,194098899  | 6,107643797 | 2,076833  | 0,162915525 |
| 6005 | ENSG00000165502 | -0,193940808 | 6,774259921 | 0,5373316 | 0,470910509 |
| 6006 | ENSG00000165507 | -0,968259581 | 6,026242764 | 7,6628377 | 0,010910274 |
| 6007 | ENSG00000165512 | -0,408835101 | 4,303934951 | 3,1314368 | 0,089989916 |
| 6008 | ENSG00000165516 | -0,169379876 | 5,705953749 | 2,0934948 | 0,161308158 |
| 6009 | ENSG00000165525 | -0,04785041  | 5,977837208 | 0,1297618 | 0,721938753 |
| 6010 | ENSG00000165526 | -0,220182327 | 4,469781202 | 4,0468432 | 0,13180094  |
| 6011 | ENSG00000165527 | 0,046549583  | 5,352921997 | 0,0929296 | 0,763213462 |
| 6012 | ENSG00000165533 | 0,30909693   | 3,761499461 | 5,2126546 | 0,088832213 |
| 6013 | ENSG00000165572 | -0,044106037 | 4,401973643 | 0,0745721 | 0,787217683 |
| 6014 | ENSG00000165609 | 0,018964333  | 4,26271434  | 0,0175415 | 0,895776772 |
| 6015 | ENSG00000165626 | -0,019811636 | 3,772644384 | 0,0123765 | 0,912378777 |
| 6016 | ENSG00000165629 | -0,770250536 | 8,52381778  | 9,5271444 | 0,005190965 |

|      |                 |              |             |           |             |
|------|-----------------|--------------|-------------|-----------|-------------|
| 6017 | ENSG00000165633 | 0,260209727  | 5,353368451 | 1,4439054 | 0,24167674  |
| 6018 | ENSG00000165637 | -0,404656814 | 7,650803153 | 6,8943005 | 0,015053468 |
| 6019 | ENSG00000165650 | 0,007410879  | 5,613981681 | 0,0039519 | 0,950413436 |
| 6020 | ENSG00000165660 | -0,258184589 | 4,432556559 | 2,157507  | 0,155354673 |
| 6021 | ENSG00000165669 | -0,083296615 | 5,560070189 | 0,3901424 | 0,538321036 |
| 6022 | ENSG00000165671 | 0,028085003  | 6,601258372 | 0,0705011 | 0,792954291 |
| 6023 | ENSG00000165672 | -0,359331309 | 7,357814299 | 2,7504027 | 0,110741318 |
| 6024 | ENSG00000165675 | 0,075609919  | 4,233540077 | 0,5408566 | 0,564542679 |
| 6025 | ENSG00000165678 | -0,394146326 | 8,35714807  | 2,6903537 | 0,114498039 |
| 6026 | ENSG00000165688 | -0,038992121 | 5,105269149 | 0,0628261 | 0,804298368 |
| 6027 | ENSG00000165699 | 0,074616513  | 6,025440868 | 0,187054  | 0,669388637 |
| 6028 | ENSG00000165704 | -0,06882783  | 3,867716037 | 0,1819727 | 0,741558326 |
| 6029 | ENSG00000165714 | -0,073790324 | 3,683341223 | 0,2289423 | 0,672342721 |
| 6030 | ENSG00000165732 | -0,332325328 | 6,166283365 | 2,4674734 | 0,129814896 |
| 6031 | ENSG00000165733 | -0,132243881 | 5,657189986 | 1,4154141 | 0,246196092 |
| 6032 | ENSG00000165757 | 0,137113654  | 6,499634426 | 0,6055693 | 0,44435474  |
| 6033 | ENSG00000165775 | -0,521240012 | 7,261039831 | 9,945757  | 0,004425816 |
| 6034 | ENSG00000165792 | -0,185401903 | 4,270102532 | 2,4058043 | 0,202524372 |
| 6035 | ENSG00000165795 | -0,180823085 | 7,038754775 | 1,5858675 | 0,220447857 |
| 6036 | ENSG00000165801 | 0,38851406   | 4,70832527  | 2,6150268 | 0,119423911 |
| 6037 | ENSG00000165806 | 0,241762132  | 4,292746714 | 1,3097495 | 0,264153951 |
| 6038 | ENSG00000165810 | -0,211018077 | 5,708554587 | 0,3632925 | 0,552551955 |
| 6039 | ENSG00000165813 | -0,027263132 | 5,950577018 | 0,029009  | 0,866240406 |
| 6040 | ENSG00000165819 | -0,034763767 | 4,959977371 | 0,1551347 | 0,697273708 |
| 6041 | ENSG00000165832 | 0,06832012   | 4,991945392 | 0,0611794 | 0,806825455 |
| 6042 | ENSG00000165861 | 0,211483592  | 4,033491878 | 1,7108527 | 0,231400396 |
| 6043 | ENSG00000165868 | 0,127340987  | 4,8943551   | 0,4126665 | 0,526940455 |
| 6044 | ENSG00000165874 | -0,342061566 | 3,759650454 | 3,6859223 | 0,080985861 |
| 6045 | ENSG00000165895 | -0,105148008 | 5,019877459 | 0,383407  | 0,541841374 |
| 6046 | ENSG00000165898 | -0,041928571 | 4,235228405 | 0,0535112 | 0,819098053 |
| 6047 | ENSG00000165899 | -0,135972589 | 5,417302016 | 0,0775432 | 0,783130899 |
| 6048 | ENSG00000165912 | 0,179806495  | 5,938094633 | 0,4759928 | 0,497112644 |
| 6049 | ENSG00000165914 | 0,019786787  | 4,714010555 | 0,0122922 | 0,912676431 |
| 6050 | ENSG00000165916 | -0,238045725 | 6,357166787 | 1,6602409 | 0,210320196 |
| 6051 | ENSG00000165929 | -0,342355765 | 5,246963637 | 1,1807941 | 0,28839755  |
| 6052 | ENSG00000165934 | -0,051022512 | 5,767713354 | 0,1669345 | 0,686598464 |
| 6053 | ENSG00000165943 | 0,408469959  | 5,745160962 | 5,7016837 | 0,02550635  |
| 6054 | ENSG00000165949 | -0,154506659 | 5,571129648 | 0,7045614 | 0,409853586 |
| 6055 | ENSG00000165959 | -0,550841638 | 4,775623515 | 2,6006533 | 0,120391891 |
| 6056 | ENSG00000165983 | -0,410012383 | 4,497358723 | 4,4763125 | 0,045351147 |
| 6057 | ENSG00000165995 | -0,478341674 | 5,586678488 | 4,6311545 | 0,042074468 |
| 6058 | ENSG00000165996 | -0,423534896 | 5,702793837 | 3,2359752 | 0,085110088 |
| 6059 | ENSG00000165997 | 0,105428143  | 5,52507914  | 0,1671696 | 0,686403356 |
| 6060 | ENSG00000166004 | -0,12520436  | 4,69262795  | 0,8094724 | 0,417094043 |
| 6061 | ENSG00000166012 | 0,066717707  | 5,754547423 | 0,1083413 | 0,745004541 |
| 6062 | ENSG00000166016 | 0,109555284  | 4,511830234 | 0,2234323 | 0,640870116 |
| 6063 | ENSG00000166024 | -0,028814866 | 4,186698641 | 0,0538343 | 0,924064804 |
| 6064 | ENSG00000166025 | 0,121737159  | 6,990967994 | 0,6761718 | 0,419289277 |
| 6065 | ENSG00000166033 | 0,673718398  | 6,388869646 | 15,801031 | 0,000594031 |
| 6066 | ENSG00000166037 | -0,130805368 | 5,553611815 | 0,431838  | 0,517579358 |
| 6067 | ENSG00000166046 | -0,103742925 | 5,473435603 | 0,1975096 | 0,660872094 |
| 6068 | ENSG00000166068 | 0,165181421  | 5,798101887 | 0,801248  | 0,379948218 |
| 6069 | ENSG00000166086 | 0,153725645  | 5,660078339 | 1,1002194 | 0,305047653 |
| 6070 | ENSG00000166091 | -1,082353587 | 4,899197686 | 10,652219 | 0,003400247 |
| 6071 | ENSG00000166106 | -0,623915861 | 4,703840635 | 3,1109371 | 0,090984319 |
| 6072 | ENSG00000166123 | -0,834859389 | 4,483198505 | 4,3407639 | 0,048457111 |
| 6073 | ENSG00000166128 | 0,094673221  | 5,413889385 | 0,1278681 | 0,723897509 |
| 6074 | ENSG00000166135 | -0,057964104 | 5,788245109 | 0,1679133 | 0,685736108 |
| 6075 | ENSG00000166136 | -0,363445247 | 4,759501295 | 4,1278645 | 0,053833134 |



|      |                 |              |             |           |             |
|------|-----------------|--------------|-------------|-----------|-------------|
| 6076 | ENSG00000166147 | -0,067073388 | 8,60719059  | 0,1028337 | 0,751336575 |
| 6077 | ENSG00000166164 | 0,041233505  | 5,517221917 | 0,2565876 | 0,617255877 |
| 6078 | ENSG00000166165 | -0,444758526 | 7,062202985 | 1,6592316 | 0,210454191 |
| 6079 | ENSG00000166167 | 0,166185627  | 5,650441942 | 1,7343478 | 0,200720654 |
| 6080 | ENSG00000166170 | 0,050074062  | 5,234856994 | 0,2049854 | 0,654933213 |
| 6081 | ENSG00000166173 | -0,46844701  | 4,879785817 | 6,9977013 | 0,014426603 |
| 6082 | ENSG00000166181 | 0,039200054  | 5,770421942 | 0,1101574 | 0,742945568 |
| 6083 | ENSG00000166197 | -0,038193187 | 5,420656874 | 0,0889953 | 0,768114566 |
| 6084 | ENSG00000166199 | -0,20794014  | 3,708069485 | 2,6675531 | 0,280724586 |
| 6085 | ENSG00000166200 | -0,306701655 | 6,795050811 | 1,2037142 | 0,28388006  |
| 6086 | ENSG00000166206 | -1,099231876 | 5,601274737 | 12,809891 | 0,001580458 |
| 6087 | ENSG00000166224 | 0,027762016  | 5,025732811 | 0,0180795 | 0,89420277  |
| 6088 | ENSG00000166225 | -0,071401942 | 5,619442494 | 0,231108  | 0,635222813 |
| 6089 | ENSG00000166226 | -0,332532413 | 6,332145366 | 2,9970304 | 0,096747001 |
| 6090 | ENSG00000166228 | -0,160471866 | 5,208570097 | 1,0695402 | 0,311749591 |
| 6091 | ENSG00000166233 | 0,014686246  | 6,683393955 | 0,0162243 | 0,899741653 |
| 6092 | ENSG00000166250 | 0,408369788  | 5,246116649 | 0,9273929 | 0,345509264 |
| 6093 | ENSG00000166260 | -0,124363129 | 5,167582294 | 0,6539794 | 0,426939785 |
| 6094 | ENSG00000166263 | 0,104049903  | 4,37001262  | 0,7264003 | 0,474327632 |
| 6095 | ENSG00000166265 | -0,49079114  | 4,815391727 | 7,6991562 | 0,010747614 |
| 6096 | ENSG00000166266 | -0,250181878 | 6,370368611 | 1,1842323 | 0,287713823 |
| 6097 | ENSG00000166272 | 0,21208137   | 5,488930785 | 1,0569137 | 0,314559526 |
| 6098 | ENSG00000166275 | -0,049207084 | 4,706908506 | 0,0546021 | 0,817297642 |
| 6099 | ENSG00000166295 | -0,300399249 | 7,254985851 | 3,8854066 | 0,060770674 |
| 6100 | ENSG00000166311 | -0,19805783  | 4,872698148 | 1,0425428 | 0,317799932 |
| 6101 | ENSG00000166313 | -0,169485244 | 5,416745638 | 0,8316851 | 0,371200181 |
| 6102 | ENSG00000166317 | 0,264866539  | 7,76896772  | 0,6850069 | 0,4163321   |
| 6103 | ENSG00000166326 | 0,111297312  | 6,297454782 | 1,0336208 | 0,319798341 |
| 6104 | ENSG00000166340 | -0,207045497 | 5,623139933 | 1,561012  | 0,224022165 |
| 6105 | ENSG00000166341 | 0,50929599   | 4,537927366 | 1,8495134 | 0,186958946 |
| 6106 | ENSG00000166347 | -0,243471502 | 5,406169701 | 0,8660276 | 0,361676296 |
| 6107 | ENSG00000166348 | 0,144560726  | 5,237014771 | 0,3603431 | 0,554156562 |
| 6108 | ENSG00000166352 | -0,633104093 | 4,543766279 | 5,4513282 | 0,02859818  |
| 6109 | ENSG00000166377 | 0,130004348  | 5,046348134 | 1,5128802 | 0,261316968 |
| 6110 | ENSG00000166387 | 0,077614089  | 4,383708505 | 0,2575019 | 0,62580222  |
| 6111 | ENSG00000166398 | 0,052652173  | 5,248585046 | 0,110868  | 0,742159474 |
| 6112 | ENSG00000166402 | 0,110735433  | 4,825494845 | 0,2696673 | 0,608492446 |
| 6113 | ENSG00000166405 | -0,170347263 | 4,558908614 | 0,9279443 | 0,345368696 |
| 6114 | ENSG00000166411 | -0,499639318 | 6,442712749 | 2,8307216 | 0,105939459 |
| 6115 | ENSG00000166432 | 0,408822584  | 4,903367497 | 4,8514121 | 0,037862568 |
| 6116 | ENSG00000166435 | 0,278313974  | 3,880408853 | 1,7111464 | 0,203697576 |
| 6117 | ENSG00000166439 | 0,14759324   | 5,121594272 | 1,177007  | 0,289118416 |
| 6118 | ENSG00000166441 | 0,138795257  | 8,248828623 | 0,5787974 | 0,454461396 |
| 6119 | ENSG00000166444 | -0,162652919 | 4,808314519 | 0,4401301 | 0,513622967 |
| 6120 | ENSG00000166454 | 0,15383216   | 5,690255177 | 2,7391896 | 0,111384714 |
| 6121 | ENSG00000166471 | -0,033022382 | 4,80402027  | 0,0486919 | 0,827292943 |
| 6122 | ENSG00000166473 | 0,267854526  | 4,093384028 | 0,620489  | 0,438869726 |
| 6123 | ENSG00000166477 | -0,097978311 | 3,986011026 | 0,857462  | 0,58053949  |
| 6124 | ENSG00000166478 | -0,312242544 | 4,367923538 | 3,1887828 | 0,087274188 |
| 6125 | ENSG00000166479 | -0,13219115  | 6,13567703  | 0,5153768 | 0,480014536 |
| 6126 | ENSG00000166482 | 0,410218947  | 6,2636569   | 2,1583892 | 0,155273873 |
| 6127 | ENSG00000166483 | 0,208271996  | 5,994777736 | 0,8076954 | 0,378070201 |
| 6128 | ENSG00000166503 | -0,020599199 | 5,867405598 | 0,0295847 | 0,864927905 |
| 6129 | ENSG00000166508 | 0,199448186  | 4,421435679 | 1,0325749 | 0,320074433 |
| 6130 | ENSG00000166510 | -0,106089041 | 3,717057816 | 0,4979861 | 0,55758215  |
| 6131 | ENSG00000166526 | -0,066420773 | 4,50301431  | 0,3259358 | 0,57355259  |
| 6132 | ENSG00000166532 | -0,088582642 | 5,40159771  | 0,4368016 | 0,515181876 |
| 6133 | ENSG00000166548 | 0,447773431  | 4,692138329 | 6,1138511 | 0,021194965 |
| 6134 | ENSG00000166557 | -0,065635424 | 4,768166604 | 0,135234  | 0,716412018 |

|      |                 |              |             |           |             |
|------|-----------------|--------------|-------------|-----------|-------------|
| 6135 | ENSG00000166562 | -0,215944162 | 4,121636557 | 1,0187339 | 0,323269935 |
| 6136 | ENSG00000166575 | 0,187906964  | 5,522332903 | 0,7031906 | 0,410302708 |
| 6137 | ENSG00000166579 | 0,014038852  | 5,141544793 | 0,0060908 | 0,938464961 |
| 6138 | ENSG00000166592 | -0,170403229 | 6,495745561 | 0,1968552 | 0,661397141 |
| 6139 | ENSG00000166595 | -0,29517041  | 5,063550727 | 2,264558  | 0,145908097 |
| 6140 | ENSG00000166598 | -0,193467016 | 8,781036203 | 0,6849724 | 0,416343666 |
| 6141 | ENSG00000166619 | -0,199396034 | 6,010935585 | 2,0445158 | 0,166093001 |
| 6142 | ENSG00000166669 | 0,074457313  | 5,095832851 | 0,1793694 | 0,67583092  |
| 6143 | ENSG00000166681 | -0,349583194 | 6,322711916 | 4,1053443 | 0,05444026  |
| 6144 | ENSG00000166685 | -0,099993215 | 4,530770877 | 0,3867166 | 0,540116672 |
| 6145 | ENSG00000166689 | -0,218964215 | 5,232555212 | 0,5121602 | 0,48137321  |
| 6146 | ENSG00000166704 | -0,022185268 | 4,205907215 | 0,0251248 | 0,875429801 |
| 6147 | ENSG00000166710 | 0,078296683  | 10,21122167 | 0,1052631 | 0,748513894 |
| 6148 | ENSG00000166716 | 0,193641914  | 4,829741007 | 0,8877275 | 0,355838557 |
| 6149 | ENSG00000166734 | 0,463066834  | 6,275450713 | 4,4572807 | 0,045773373 |
| 6150 | ENSG00000166741 | -0,286646598 | 6,082692046 | 0,7294923 | 0,401813818 |
| 6151 | ENSG00000166747 | 0,003739453  | 6,274926626 | 0,0014386 | 0,970069097 |
| 6152 | ENSG00000166750 | 0,243460464  | 6,082818557 | 1,2922012 | 0,267291489 |
| 6153 | ENSG00000166770 | -0,151300235 | 4,187204471 | 1,3560804 | 0,353408804 |
| 6154 | ENSG00000166780 | 0,114020209  | 5,065983555 | 0,5995444 | 0,44659826  |
| 6155 | ENSG00000166783 | 0,193347865  | 5,943492385 | 1,5976668 | 0,218833746 |
| 6156 | ENSG00000166794 | 0,097347011  | 5,034302853 | 0,2320351 | 0,63454855  |
| 6157 | ENSG00000166797 | -0,438601588 | 4,789139064 | 5,4896299 | 0,028099169 |
| 6158 | ENSG00000166801 | 0,050391189  | 4,533591468 | 0,068696  | 0,795566818 |
| 6159 | ENSG00000166816 | -0,093068817 | 4,552066966 | 0,1075905 | 0,745857046 |
| 6160 | ENSG00000166819 | 1,231246828  | 6,757347317 | 2,1135499 | 0,159445271 |
| 6161 | ENSG00000166822 | 0,242330743  | 4,051394783 | 2,2446955 | 0,147607705 |
| 6162 | ENSG00000166831 | -0,454654313 | 6,725430255 | 2,7838723 | 0,108710076 |
| 6163 | ENSG00000166833 | 0,36018159   | 5,312587561 | 2,433911  | 0,132325358 |
| 6164 | ENSG00000166847 | -0,018962286 | 5,65385978  | 0,0370543 | 0,875693614 |
| 6165 | ENSG00000166848 | 0,384533241  | 5,708653607 | 14,523145 | 0,000888407 |
| 6166 | ENSG00000166855 | -0,089681082 | 5,767487915 | 0,5941368 | 0,448605124 |
| 6167 | ENSG00000166881 | 0,360391322  | 3,710813073 | 6,0906241 | 0,052798828 |
| 6168 | ENSG00000166887 | 0,190029593  | 5,926539159 | 1,4901826 | 0,234495988 |
| 6169 | ENSG00000166888 | 0,205027809  | 6,0399454   | 0,9833561 | 0,331640372 |
| 6170 | ENSG00000166889 | -0,058450608 | 4,52462811  | 0,1143913 | 0,738252045 |
| 6171 | ENSG00000166900 | -0,135730559 | 4,594952415 | 0,8004236 | 0,380189329 |
| 6172 | ENSG00000166902 | -0,310916467 | 5,108872442 | 4,2539703 | 0,050570084 |
| 6173 | ENSG00000166908 | 0,091963791  | 4,112172886 | 0,4127659 | 0,654484922 |
| 6174 | ENSG00000166912 | -0,174010659 | 5,478541676 | 1,4690266 | 0,237727288 |
| 6175 | ENSG00000166913 | 0,058063506  | 7,244204963 | 0,3084583 | 0,583945457 |
| 6176 | ENSG00000166927 | 0,088806377  | 4,859470173 | 0,0686319 | 0,795659864 |
| 6177 | ENSG00000166938 | -0,00377289  | 5,330026099 | 0,0010226 | 0,974762898 |
| 6178 | ENSG00000166946 | 0,192148068  | 5,785485977 | 3,3307959 | 0,080900702 |
| 6179 | ENSG00000166949 | -0,382318252 | 5,695751891 | 2,7564187 | 0,110372959 |
| 6180 | ENSG00000166963 | -0,070000119 | 6,632932058 | 0,0481256 | 0,828283466 |
| 6181 | ENSG00000166971 | -0,590146636 | 5,670735622 | 18,51252  | 0,000260862 |
| 6182 | ENSG00000166974 | 0,143847641  | 6,792967645 | 0,8267353 | 0,372602707 |
| 6183 | ENSG00000166979 | -0,400592263 | 4,31780146  | 3,8786865 | 0,061003308 |
| 6184 | ENSG00000166986 | -0,174721999 | 5,689034739 | 1,4462938 | 0,241276684 |
| 6185 | ENSG00000167004 | -0,0295681   | 7,409410835 | 0,0272458 | 0,870329571 |
| 6186 | ENSG00000167005 | 0,095582816  | 6,410350924 | 0,2883423 | 0,596416672 |
| 6187 | ENSG00000167037 | 0,20223758   | 5,110368458 | 0,3671321 | 0,550476362 |
| 6188 | ENSG00000167074 | 1,23415272   | 4,897620102 | 18,641909 | 0,000252757 |
| 6189 | ENSG00000167081 | 0,0088689    | 5,856953256 | 0,0050055 | 0,944203381 |
| 6190 | ENSG00000167085 | -0,359244237 | 5,58199936  | 4,6074964 | 0,042557389 |
| 6191 | ENSG00000167088 | -0,338612101 | 4,366009284 | 5,5268848 | 0,027597414 |
| 6192 | ENSG00000167107 | 0,151279184  | 4,88764731  | 0,410729  | 0,527903695 |
| 6193 | ENSG00000167110 | 0,271493415  | 5,907384492 | 2,9795258 | 0,097669594 |

|      |                 |              |             |           |             |
|------|-----------------|--------------|-------------|-----------|-------------|
| 6194 | ENSG00000167112 | -0,082163854 | 4,542433019 | 0,2925655 | 0,59374995  |
| 6195 | ENSG00000167113 | 0,141318557  | 4,201626326 | 0,8632841 | 0,450380362 |
| 6196 | ENSG00000167118 | -0,127903846 | 4,652748388 | 0,6707207 | 0,42116504  |
| 6197 | ENSG00000167186 | -0,100828997 | 4,610074579 | 0,4836257 | 0,493701437 |
| 6198 | ENSG00000167191 | -0,082844456 | 5,35454638  | 0,1275051 | 0,724272611 |
| 6199 | ENSG00000167193 | 0,142363929  | 5,803075967 | 1,4130335 | 0,246582204 |
| 6200 | ENSG00000167196 | -0,143225024 | 4,814939952 | 1,2161499 | 0,29779352  |
| 6201 | ENSG00000167202 | 0,663866863  | 5,427564401 | 4,2937683 | 0,049589496 |
| 6202 | ENSG00000167232 | 0,017943952  | 8,182771815 | 0,0071669 | 0,933262539 |
| 6203 | ENSG00000167257 | 0,144382249  | 3,691722403 | 0,9326847 | 0,458768482 |
| 6204 | ENSG00000167258 | 0,030391664  | 5,310373516 | 0,0357573 | 0,851668224 |
| 6205 | ENSG00000167272 | 0,000232761  | 4,058725728 | 2,749E-06 | 0,998691271 |
| 6206 | ENSG00000167283 | -0,469109535 | 6,008531393 | 3,1037476 | 0,091336069 |
| 6207 | ENSG00000167291 | 0,118720634  | 4,835190617 | 0,1484061 | 0,70358574  |
| 6208 | ENSG00000167306 | 0,788987268  | 4,056350768 | 6,7974357 | 0,015718506 |
| 6209 | ENSG00000167315 | -0,167815489 | 6,628942753 | 1,075255  | 0,310489036 |
| 6210 | ENSG00000167323 | 0,014769595  | 4,220757066 | 0,0048579 | 0,94503304  |
| 6211 | ENSG00000167325 | -0,122088747 | 5,274952534 | 0,4599108 | 0,504399191 |
| 6212 | ENSG00000167378 | 0,093782205  | 5,361365245 | 0,2204792 | 0,6430747   |
| 6213 | ENSG00000167380 | 0,031455797  | 4,805298052 | 0,0611757 | 0,806823617 |
| 6214 | ENSG00000167384 | 0,02118883   | 3,611813082 | 0,0283767 | 0,902517776 |
| 6215 | ENSG00000167393 | 0,165705072  | 5,299296849 | 0,607741  | 0,443549589 |
| 6216 | ENSG00000167447 | 0,044612597  | 3,762468105 | 0,1762417 | 0,800516136 |
| 6217 | ENSG00000167460 | -0,197589735 | 7,498314887 | 0,9673884 | 0,335516958 |
| 6218 | ENSG00000167468 | 0,116626972  | 6,569507178 | 0,2305953 | 0,635596381 |
| 6219 | ENSG00000167470 | -0,073080752 | 5,011723477 | 0,1066325 | 0,746949678 |
| 6220 | ENSG00000167491 | -0,01556235  | 4,470295603 | 0,0068645 | 0,934682199 |
| 6221 | ENSG00000167515 | 0,173023133  | 4,322820414 | 1,2627724 | 0,272663499 |
| 6222 | ENSG00000167522 | 0,10939581   | 5,85598051  | 0,2132133 | 0,648577068 |
| 6223 | ENSG00000167526 | 0,338708334  | 8,50684378  | 2,3390532 | 0,139738278 |
| 6224 | ENSG00000167528 | 0,085044652  | 4,928031299 | 0,664911  | 0,442630605 |
| 6225 | ENSG00000167548 | 0,214990738  | 5,544165267 | 0,3413272 | 0,564723485 |
| 6226 | ENSG00000167549 | 0,019965101  | 5,696459226 | 0,014106  | 0,906484909 |
| 6227 | ENSG00000167552 | -0,182061014 | 7,365037579 | 1,0715922 | 0,311296167 |
| 6228 | ENSG00000167553 | -0,265099232 | 5,910278813 | 2,5074227 | 0,126899759 |
| 6229 | ENSG00000167555 | 0,043242172  | 4,759466963 | 0,0815426 | 0,777761261 |
| 6230 | ENSG00000167562 | -0,019132792 | 3,768104479 | 0,0231594 | 0,950082907 |
| 6231 | ENSG00000167565 | 0,154691229  | 3,969181005 | 0,9695591 | 0,418805216 |
| 6232 | ENSG00000167588 | 0,897930177  | 6,275343894 | 1,2800919 | 0,269485015 |
| 6233 | ENSG00000167601 | 0,003471791  | 5,197231113 | 0,0001797 | 0,989418715 |
| 6234 | ENSG00000167613 | -0,056283172 | 3,823688471 | 0,035946  | 0,851282161 |
| 6235 | ENSG00000167615 | 0,472952629  | 6,291264246 | 2,9521429 | 0,099133394 |
| 6236 | ENSG00000167632 | -0,014538353 | 4,538239113 | 0,0055273 | 0,941374882 |
| 6237 | ENSG00000167635 | -0,118976365 | 6,100841745 | 0,5655916 | 0,459606825 |
| 6238 | ENSG00000167637 | -0,049565733 | 4,613104765 | 0,0839329 | 0,774619837 |
| 6239 | ENSG00000167657 | 0,268747055  | 5,208122034 | 1,3065573 | 0,264721104 |
| 6240 | ENSG00000167658 | 0,507089215  | 9,757485846 | 6,0789141 | 0,021497595 |
| 6241 | ENSG00000167671 | 0,111503758  | 5,664664055 | 0,4511674 | 0,508439775 |
| 6242 | ENSG00000167676 | 0,844033327  | 8,142363328 | 2,744641  | 0,111095451 |
| 6243 | ENSG00000167699 | 0,047187726  | 4,832081587 | 0,1306451 | 0,72103593  |
| 6244 | ENSG00000167721 | -0,035236138 | 4,825911193 | 0,1115324 | 0,777755843 |
| 6245 | ENSG00000167766 | 0,281263248  | 5,379983967 | 4,341965  | 0,048390532 |
| 6246 | ENSG00000167770 | -0,092826182 | 4,663196086 | 0,3253653 | 0,573904996 |
| 6247 | ENSG00000167778 | 0,289744521  | 5,125498122 | 2,5521824 | 0,12372494  |
| 6248 | ENSG00000167779 | -0,59958587  | 5,546262812 | 1,7369497 | 0,200439696 |
| 6249 | ENSG00000167785 | 0,001392225  | 4,020201278 | 0,0001489 | 0,995797004 |
| 6250 | ENSG00000167792 | -0,124769455 | 7,341503455 | 0,2835046 | 0,599495324 |
| 6251 | ENSG00000167815 | -0,241459998 | 6,883533093 | 1,1543706 | 0,293725183 |
| 6252 | ENSG00000167842 | 0,126026957  | 4,113828841 | 0,6720984 | 0,420695209 |

|      |                 |              |             |           |             |
|------|-----------------|--------------|-------------|-----------|-------------|
| 6253 | ENSG00000167862 | -0,454768071 | 4,029076168 | 12,621387 | 0,00817143  |
| 6254 | ENSG00000167863 | -0,573724218 | 7,848095626 | 4,3603108 | 0,047994742 |
| 6255 | ENSG00000167881 | -0,074407548 | 5,48253668  | 0,2927308 | 0,593636459 |
| 6256 | ENSG00000167904 | 0,115493534  | 3,645310154 | 0,8456656 | 0,513639927 |
| 6257 | ENSG00000167930 | -0,345212525 | 5,92708122  | 2,2564819 | 0,146596317 |
| 6258 | ENSG00000167969 | -0,244477714 | 4,944858916 | 1,6120925 | 0,216833302 |
| 6259 | ENSG00000167978 | 0,096297541  | 8,265398017 | 0,1060329 | 0,747636206 |
| 6260 | ENSG00000167986 | 0,171008993  | 7,235181855 | 2,0541855 | 0,165131466 |
| 6261 | ENSG00000167996 | 0,07891646   | 6,794967751 | 0,2452266 | 0,625131626 |
| 6262 | ENSG00000168002 | 0,137256632  | 4,273585672 | 1,1874963 | 0,360417894 |
| 6263 | ENSG00000168003 | 0,000338999  | 4,9052709   | 4,228E-06 | 0,998376996 |
| 6264 | ENSG00000168014 | 0,050878253  | 4,66472991  | 0,1343622 | 0,86308079  |
| 6265 | ENSG00000168016 | 0,697799594  | 5,212372485 | 8,0496621 | 0,009308284 |
| 6266 | ENSG00000168028 | 0,174205876  | 8,217985372 | 0,6065549 | 0,443989033 |
| 6267 | ENSG00000168036 | 0,076695607  | 8,034055969 | 0,5610592 | 0,461363351 |
| 6268 | ENSG00000168038 | -0,704545732 | 4,648711937 | 17,820272 | 0,000321445 |
| 6269 | ENSG00000168056 | 0,544563592  | 5,90872609  | 6,3193179 | 0,019353579 |
| 6270 | ENSG00000168066 | -0,036029783 | 6,446212256 | 0,0441045 | 0,835499583 |
| 6271 | ENSG00000168079 | -0,87010161  | 6,795563203 | 6,6629006 | 0,016658199 |
| 6272 | ENSG00000168090 | -0,220921566 | 5,58000317  | 2,2867078 | 0,144012435 |
| 6273 | ENSG00000168092 | 0,045375346  | 6,247130184 | 0,1880162 | 0,668579162 |
| 6274 | ENSG00000168116 | -0,07225516  | 4,225499972 | 0,1016767 | 0,752690551 |
| 6275 | ENSG00000168118 | -0,280619685 | 5,756869125 | 4,1185663 | 0,054045247 |
| 6276 | ENSG00000168137 | -0,00784028  | 6,417934923 | 0,0015701 | 0,968732713 |
| 6277 | ENSG00000168152 | -0,159000393 | 3,538536456 | 0,4389206 | 0,514196666 |
| 6278 | ENSG00000168159 | 0,001303488  | 5,342985668 | 5,461E-05 | 0,994167341 |
| 6279 | ENSG00000168172 | 0,331102894  | 6,689877041 | 4,8573517 | 0,037733777 |
| 6280 | ENSG00000168175 | -0,04931377  | 6,269898434 | 0,1249165 | 0,72695445  |
| 6281 | ENSG00000168214 | -0,264082404 | 6,45573197  | 4,2238525 | 0,051289068 |
| 6282 | ENSG00000168216 | -0,047929147 | 5,920348644 | 0,133335  | 0,718307639 |
| 6283 | ENSG00000168228 | -0,099897053 | 4,003944578 | 0,5839773 | 0,556334505 |
| 6284 | ENSG00000168234 | 0,468856955  | 3,654183784 | 3,0112956 | 0,09600262  |
| 6285 | ENSG00000168246 | 0,227914847  | 4,313906487 | 1,7139756 | 0,203337169 |
| 6286 | ENSG00000168256 | -0,186057135 | 4,646802089 | 1,214185  | 0,281847534 |
| 6287 | ENSG00000168259 | -0,185911047 | 5,702728946 | 4,2268414 | 0,051213283 |
| 6288 | ENSG00000168264 | 0,250917688  | 6,215644343 | 4,7744796 | 0,039239839 |
| 6289 | ENSG00000168268 | -0,888643371 | 5,714517113 | 8,1004516 | 0,009117962 |
| 6290 | ENSG00000168273 | -0,333846669 | 3,973412724 | 3,9030737 | 0,060255656 |
| 6291 | ENSG00000168283 | 0,142725137  | 5,017442718 | 0,6958716 | 0,412713396 |
| 6292 | ENSG00000168286 | -0,151187187 | 4,021999972 | 1,2777063 | 0,359348179 |
| 6293 | ENSG00000168288 | -0,406871038 | 6,434808918 | 2,5608172 | 0,123123295 |
| 6294 | ENSG00000168291 | -0,490722665 | 6,645479054 | 5,3632407 | 0,029783816 |
| 6295 | ENSG00000168297 | 0,31794795   | 4,603472512 | 5,7684767 | 0,024714479 |
| 6296 | ENSG00000168298 | -0,133235644 | 4,802641671 | 0,1032492 | 0,7508525   |
| 6297 | ENSG00000168300 | -0,098871608 | 7,221931063 | 0,2097963 | 0,651204298 |
| 6298 | ENSG00000168303 | -0,081442607 | 3,82650972  | 0,2535786 | 0,621025    |
| 6299 | ENSG00000168306 | 0,017366901  | 4,197534618 | 0,0127189 | 0,974914492 |
| 6300 | ENSG00000168309 | -1,010479441 | 5,442415869 | 10,317467 | 0,003849389 |
| 6301 | ENSG00000168310 | 0,129295464  | 4,315429073 | 1,1091808 | 0,420174211 |
| 6302 | ENSG00000168334 | -0,175691265 | 8,320825684 | 0,1396538 | 0,712031415 |
| 6303 | ENSG00000168374 | 0,266623252  | 6,526283432 | 2,8110697 | 0,107091496 |
| 6304 | ENSG00000168385 | 0,251987658  | 7,921892347 | 4,8049823 | 0,038672098 |
| 6305 | ENSG00000168386 | -0,401061691 | 7,10957232  | 4,5080975 | 0,04465574  |
| 6306 | ENSG00000168394 | 0,136412997  | 4,128117376 | 0,406014  | 0,530261254 |
| 6307 | ENSG00000168395 | -0,066088837 | 4,503832491 | 0,2096945 | 0,65127165  |
| 6308 | ENSG00000168397 | 0,05053749   | 4,553707961 | 0,1238488 | 0,820646273 |
| 6309 | ENSG00000168405 | 0,084683009  | 5,090566962 | 0,1361733 | 0,715474217 |
| 6310 | ENSG00000168411 | 0,315590799  | 3,67978976  | 3,1715071 | 0,106620674 |
| 6311 | ENSG00000168434 | 0,314454035  | 3,851213244 | 6,0269818 | 0,097089438 |

|      |                 |              |             |           |             |
|------|-----------------|--------------|-------------|-----------|-------------|
| 6312 | ENSG00000168438 | -0,096766956 | 5,061036248 | 0,3830165 | 0,54204556  |
| 6313 | ENSG00000168439 | -0,393132315 | 6,108021586 | 5,298157  | 0,03069513  |
| 6314 | ENSG00000168461 | 0,669776736  | 5,668680457 | 5,7461264 | 0,02499744  |
| 6315 | ENSG00000168477 | 0,291742308  | 7,177842713 | 0,5645657 | 0,460009339 |
| 6316 | ENSG00000168488 | 0,133215507  | 4,728067113 | 0,2759981 | 0,604340207 |
| 6317 | ENSG00000168495 | 0,079762742  | 4,122477058 | 0,2767377 | 0,661187661 |
| 6318 | ENSG00000168497 | 0,018200461  | 7,264042238 | 0,0082785 | 0,9282873   |
| 6319 | ENSG00000168509 | -0,467946474 | 5,605432067 | 2,8177983 | 0,106695414 |
| 6320 | ENSG00000168522 | -0,141088461 | 5,610710959 | 1,2011038 | 0,284350792 |
| 6321 | ENSG00000168538 | 0,007083272  | 5,607447464 | 0,0039725 | 0,95028456  |
| 6322 | ENSG00000168542 | 1,159180645  | 8,977966774 | 5,7533447 | 0,024915857 |
| 6323 | ENSG00000168564 | 0,091014815  | 4,147584099 | 0,4401754 | 0,513582709 |
| 6324 | ENSG00000168566 | -0,106644428 | 4,679094965 | 0,5498021 | 0,465855902 |
| 6325 | ENSG00000168575 | -0,103259436 | 6,692904898 | 0,2565696 | 0,617284765 |
| 6326 | ENSG00000168591 | 0,030370611  | 4,32878907  | 0,0634533 | 0,907012234 |
| 6327 | ENSG00000168610 | -0,29514307  | 7,432420342 | 2,0059775 | 0,170017197 |
| 6328 | ENSG00000168615 | -0,108726617 | 6,742770929 | 0,3352797 | 0,568167464 |
| 6329 | ENSG00000168653 | -0,712238971 | 7,691045138 | 8,1767512 | 0,00884006  |
| 6330 | ENSG00000168672 | 0,55578711   | 4,151978365 | 4,2179182 | 0,05148082  |
| 6331 | ENSG00000168675 | -0,007806361 | 5,575043053 | 0,0021761 | 0,963194252 |
| 6332 | ENSG00000168679 | 0,283845771  | 3,564056967 | 2,2810492 | 0,147028432 |
| 6333 | ENSG00000168702 | -1,287682625 | 3,811506447 | 9,6816421 | 0,004892846 |
| 6334 | ENSG00000168710 | 0,189560475  | 6,094659862 | 1,4172688 | 0,245937561 |
| 6335 | ENSG00000168724 | -0,424155467 | 6,291394409 | 11,469143 | 0,002518657 |
| 6336 | ENSG00000168734 | -0,140716423 | 6,494831915 | 0,6214149 | 0,43853286  |
| 6337 | ENSG00000168758 | 0,351342347  | 4,481908682 | 3,0252082 | 0,095283021 |
| 6338 | ENSG00000168763 | 0,279374222  | 3,957245343 | 1,9419681 | 0,176711783 |
| 6339 | ENSG00000168765 | -0,449619544 | 4,293023207 | 7,2068633 | 0,013201502 |
| 6340 | ENSG00000168769 | -0,2240545   | 6,05459878  | 3,5385784 | 0,072569328 |
| 6341 | ENSG00000168781 | 0,201968585  | 4,823830349 | 2,0037677 | 0,170215794 |
| 6342 | ENSG00000168795 | 0,240410714  | 3,814610106 | 3,3440185 | 0,199910097 |
| 6343 | ENSG00000168803 | -0,317599781 | 5,066032095 | 2,1714127 | 0,154086985 |
| 6344 | ENSG00000168807 | 0,490844996  | 5,74652113  | 2,7699088 | 0,109552165 |
| 6345 | ENSG00000168813 | 0,088071001  | 5,367896932 | 0,8995125 | 0,352690457 |
| 6346 | ENSG00000168818 | -0,102789704 | 4,179360393 | 1,3209548 | 0,504103592 |
| 6347 | ENSG00000168827 | -0,228331637 | 6,135199883 | 1,9908124 | 0,171575002 |
| 6348 | ENSG00000168874 | 0,627179559  | 4,492553774 | 3,1794905 | 0,08770775  |
| 6349 | ENSG00000168883 | -0,028659486 | 4,632855781 | 0,1123813 | 0,809904821 |
| 6350 | ENSG00000168887 | 0,040179071  | 4,539459623 | 0,1748899 | 0,820916614 |
| 6351 | ENSG00000168894 | -0,100390723 | 4,858473132 | 0,2623033 | 0,613401513 |
| 6352 | ENSG00000168904 | -0,138071409 | 4,242978552 | 3,0113602 | 0,356969089 |
| 6353 | ENSG00000168906 | -0,24725388  | 7,305340779 | 1,0314246 | 0,320338345 |
| 6354 | ENSG00000168916 | 0,168347925  | 5,647055719 | 0,8258154 | 0,372864216 |
| 6355 | ENSG00000168918 | 0,258435367  | 3,743423848 | 1,4171515 | 0,245956535 |
| 6356 | ENSG00000168924 | -0,076138041 | 4,996140604 | 0,1351887 | 0,716457299 |
| 6357 | ENSG00000168936 | 0,107670717  | 4,89026111  | 0,4967588 | 0,48796992  |
| 6358 | ENSG00000168938 | -0,357018524 | 4,68127038  | 10,185612 | 0,00776901  |
| 6359 | ENSG00000168944 | 0,168122711  | 4,983708036 | 2,3934244 | 0,135383625 |
| 6360 | ENSG00000168952 | -0,657845397 | 4,233777388 | 9,5403197 | 0,005164779 |
| 6361 | ENSG00000168958 | -0,262707751 | 6,004779967 | 6,0559132 | 0,021719236 |
| 6362 | ENSG00000168994 | -0,084891963 | 4,546370609 | 0,153816  | 0,698508151 |
| 6363 | ENSG00000169016 | 0,038714071  | 4,511399128 | 0,085611  | 0,793114525 |
| 6364 | ENSG00000169018 | -0,218540033 | 6,917607282 | 2,2619257 | 0,146098996 |
| 6365 | ENSG00000169019 | -0,05425571  | 4,207118742 | 0,0384704 | 0,846215838 |
| 6366 | ENSG00000169020 | -0,568104059 | 6,230531678 | 6,1304413 | 0,021039275 |
| 6367 | ENSG00000169021 | -0,59951296  | 7,790943975 | 10,199305 | 0,004023157 |
| 6368 | ENSG00000169031 | -0,096590767 | 4,540920433 | 0,1118605 | 0,74105189  |
| 6369 | ENSG00000169032 | -0,076177296 | 4,672235094 | 0,3406634 | 0,5650799   |
| 6370 | ENSG00000169045 | 0,072650116  | 7,859925415 | 0,1694802 | 0,684366971 |

|      |                 |              |             |           |             |
|------|-----------------|--------------|-------------|-----------|-------------|
| 6371 | ENSG00000169047 | 0,186256383  | 4,41800891  | 1,1326364 | 0,298206463 |
| 6372 | ENSG00000169057 | 0,100925618  | 5,80735136  | 0,2298327 | 0,63615299  |
| 6373 | ENSG00000169062 | 0,172574705  | 4,939720724 | 2,026432  | 0,170039102 |
| 6374 | ENSG00000169083 | -0,084832478 | 5,303614978 | 0,28518   | 0,598425315 |
| 6375 | ENSG00000169084 | -0,259517246 | 4,135768573 | 3,6685132 | 0,105525286 |
| 6376 | ENSG00000169087 | 0,088513027  | 3,60704205  | 0,4835111 | 0,668235185 |
| 6377 | ENSG00000169100 | 0,319483299  | 6,518361318 | 3,1609847 | 0,088578619 |
| 6378 | ENSG00000169116 | 0,197602089  | 7,57375559  | 0,6919788 | 0,414004407 |
| 6379 | ENSG00000169118 | 0,239719152  | 3,945939195 | 3,1281192 | 0,155242526 |
| 6380 | ENSG00000169122 | 0,138836042  | 4,473526885 | 0,7164282 | 0,405996662 |
| 6381 | ENSG00000169139 | -0,123011423 | 5,009078263 | 0,4932692 | 0,489486023 |
| 6382 | ENSG00000169155 | -0,135411252 | 5,248527574 | 0,7540045 | 0,394138503 |
| 6383 | ENSG00000169180 | 0,069004267  | 5,218341503 | 0,1420294 | 0,709709737 |
| 6384 | ENSG00000169184 | 0,063933321  | 4,132409593 | 0,0596033 | 0,809278155 |
| 6385 | ENSG00000169189 | 0,267925892  | 4,255497814 | 2,2281065 | 0,149045372 |
| 6386 | ENSG00000169193 | 0,05352796   | 3,859066197 | 0,0373472 | 0,848448044 |
| 6387 | ENSG00000169203 | 0,043073938  | 5,619704049 | 0,0315875 | 0,860484566 |
| 6388 | ENSG00000169217 | 0,170144616  | 5,08833913  | 0,9631708 | 0,336551431 |
| 6389 | ENSG00000169223 | 0,000402058  | 5,217118482 | 7,242E-06 | 0,997875973 |
| 6390 | ENSG00000169231 | 0,572669502  | 3,871945289 | 4,9996896 | 0,035294198 |
| 6391 | ENSG00000169239 | 0,095711855  | 3,690147213 | 0,2188492 | 0,644299295 |
| 6392 | ENSG00000169242 | 0,400530108  | 4,29671567  | 5,8850569 | 0,023478102 |
| 6393 | ENSG00000169246 | 0,031291829  | 5,905469127 | 0,0147098 | 0,904514308 |
| 6394 | ENSG00000169247 | 0,227171415  | 3,977773499 | 0,8260145 | 0,372807594 |
| 6395 | ENSG00000169251 | -0,180339139 | 6,23366751  | 0,6927656 | 0,413742982 |
| 6396 | ENSG00000169255 | -0,365262821 | 6,249744376 | 1,7645584 | 0,197025073 |
| 6397 | ENSG00000169271 | -0,644571872 | 6,9016055   | 4,9602379 | 0,03595793  |
| 6398 | ENSG00000169282 | 0,058791849  | 3,965671768 | 0,1397453 | 0,711941571 |
| 6399 | ENSG00000169288 | -0,595220403 | 4,870237535 | 4,533031  | 0,044118641 |
| 6400 | ENSG00000169291 | -0,13607958  | 5,068741092 | 0,7069822 | 0,409062281 |
| 6401 | ENSG00000169299 | 0,24795347   | 4,594626397 | 0,9820432 | 0,331956751 |
| 6402 | ENSG00000169359 | 0,086655134  | 4,651754238 | 0,2657504 | 0,611092833 |
| 6403 | ENSG00000169372 | -0,257728293 | 4,597479438 | 2,7581342 | 0,110268187 |
| 6404 | ENSG00000169375 | 0,194322471  | 5,386051473 | 1,3390671 | 0,259018294 |
| 6405 | ENSG00000169379 | 0,214324798  | 3,78240241  | 1,4092424 | 0,247240351 |
| 6406 | ENSG00000169398 | 0,039081199  | 6,803099526 | 0,1627507 | 0,690331569 |
| 6407 | ENSG00000169410 | 0,18160938   | 4,258245261 | 1,3409028 | 0,258701064 |
| 6408 | ENSG00000169418 | 0,245848037  | 4,847841756 | 0,4734331 | 0,498260072 |
| 6409 | ENSG00000169432 | -0,912739551 | 3,85933498  | 10,154365 | 0,00409149  |
| 6410 | ENSG00000169439 | 0,0742612    | 6,28887695  | 0,1809056 | 0,674530171 |
| 6411 | ENSG00000169446 | -0,070874899 | 5,357912876 | 0,2361474 | 0,631571537 |
| 6412 | ENSG00000169490 | -0,194944434 | 4,564563315 | 1,958073  | 0,192020058 |
| 6413 | ENSG00000169499 | -0,031323138 | 6,072729754 | 0,0395654 | 0,844072141 |
| 6414 | ENSG00000169504 | -0,400203882 | 8,656448802 | 3,0307701 | 0,0949971   |
| 6415 | ENSG00000169508 | -0,191946193 | 3,688981674 | 0,4210899 | 0,522789899 |
| 6416 | ENSG00000169515 | 0,304071579  | 4,859031555 | 2,8908582 | 0,102502851 |
| 6417 | ENSG00000169519 | -0,064521464 | 4,6954978   | 0,1815908 | 0,673952107 |
| 6418 | ENSG00000169554 | 0,038111529  | 7,715461448 | 0,1040462 | 0,749916711 |
| 6419 | ENSG00000169567 | -0,440310747 | 6,541355169 | 8,7166185 | 0,007111674 |
| 6420 | ENSG00000169570 | -0,086564177 | 4,352701862 | 0,1860807 | 0,670195736 |
| 6421 | ENSG00000169599 | -0,456777333 | 5,109360629 | 6,0800683 | 0,021515975 |
| 6422 | ENSG00000169604 | 0,744887515  | 6,57802109  | 8,9725816 | 0,00643737  |
| 6423 | ENSG00000169609 | -0,0323753   | 3,673117964 | 0,0623742 | 0,83941354  |
| 6424 | ENSG00000169612 | -0,267743168 | 3,697084544 | 1,8970953 | 0,190901467 |
| 6425 | ENSG00000169621 | 0,410840405  | 4,145770424 | 3,1192129 | 0,090581353 |
| 6426 | ENSG00000169629 | -0,055829572 | 7,388524142 | 0,1707905 | 0,683206124 |
| 6427 | ENSG00000169641 | -0,172538385 | 6,00856638  | 1,9104752 | 0,180077619 |
| 6428 | ENSG00000169692 | 0,025371608  | 5,059923063 | 0,0096215 | 0,922707002 |
| 6429 | ENSG00000169710 | -0,909874373 | 6,594813515 | 1,8794664 | 0,183561346 |

|      |                 |              |             |           |             |
|------|-----------------|--------------|-------------|-----------|-------------|
| 6430 | ENSG00000169714 | -0,178021403 | 8,2369579   | 1,4044475 | 0,24798124  |
| 6431 | ENSG00000169715 | 0,002069337  | 4,727840938 | 3,139E-05 | 0,995578115 |
| 6432 | ENSG00000169727 | 0,016833813  | 5,15860535  | 0,0093922 | 0,923630579 |
| 6433 | ENSG00000169738 | -0,211461324 | 4,897829998 | 0,985006  | 0,331243358 |
| 6434 | ENSG00000169740 | -0,316384225 | 4,619715244 | 5,2059441 | 0,032005364 |
| 6435 | ENSG00000169744 | 0,070386025  | 5,539256828 | 0,2480901 | 0,623119855 |
| 6436 | ENSG00000169756 | 0,153485455  | 6,231105409 | 0,9626842 | 0,336671076 |
| 6437 | ENSG00000169762 | -0,121863137 | 5,123103251 | 0,8381507 | 0,369346956 |
| 6438 | ENSG00000169764 | -0,411056542 | 8,115657113 | 3,0384208 | 0,094605419 |
| 6439 | ENSG00000169813 | -0,066308957 | 6,042555659 | 0,2312992 | 0,63506795  |
| 6440 | ENSG00000169814 | 0,210651369  | 4,368449922 | 1,3099704 | 0,264114757 |
| 6441 | ENSG00000169826 | 0,091940772  | 4,843434653 | 0,4928284 | 0,489653814 |
| 6442 | ENSG00000169855 | 0,924625877  | 5,006102724 | 12,298136 | 0,001885986 |
| 6443 | ENSG00000169857 | -0,426356361 | 4,076793352 | 6,7004428 | 0,016389862 |
| 6444 | ENSG00000169862 | 0,021689808  | 3,811144314 | 0,0041737 | 0,949044827 |
| 6445 | ENSG00000169871 | 0,2831364    | 5,128220159 | 1,4583838 | 0,239400361 |
| 6446 | ENSG00000169891 | -1,18642772  | 4,38041083  | 15,977615 | 0,000562186 |
| 6447 | ENSG00000169895 | 0,004816164  | 5,418923715 | 0,0013957 | 0,970518444 |
| 6448 | ENSG00000169896 | -0,531827154 | 4,038067848 | 4,6842263 | 0,041013406 |
| 6449 | ENSG00000169902 | -0,209531889 | 3,923695441 | 2,1254125 | 0,223857699 |
| 6450 | ENSG00000169905 | 0,272291656  | 6,623178672 | 1,7228413 | 0,20221292  |
| 6451 | ENSG00000169908 | 0,978760981  | 7,558988761 | 3,1372087 | 0,089712203 |
| 6452 | ENSG00000169914 | 0,037350505  | 3,965998051 | 0,0841844 | 0,846050918 |
| 6453 | ENSG00000169919 | 0,099862441  | 4,260994393 | 0,4099243 | 0,536672784 |
| 6454 | ENSG00000169925 | 0,371261841  | 3,755459099 | 2,2579207 | 0,146473422 |
| 6455 | ENSG00000169926 | 0,083471258  | 6,088482151 | 0,1338421 | 0,717808409 |
| 6456 | ENSG00000169946 | 0,299979826  | 5,154175455 | 4,6711584 | 0,041240755 |
| 6457 | ENSG00000169967 | 0,210158974  | 6,445156952 | 1,2776498 | 0,269930234 |
| 6458 | ENSG00000169976 | -0,291318308 | 4,916499604 | 2,0603185 | 0,164574152 |
| 6459 | ENSG00000169981 | -0,294648264 | 3,673357938 | 10,404818 | 0,121317183 |
| 6460 | ENSG00000170004 | 0,152782105  | 5,649753197 | 0,3670241 | 0,550534528 |
| 6461 | ENSG00000170017 | -0,045368575 | 4,431043672 | 0,0297064 | 0,864658462 |
| 6462 | ENSG00000170027 | -0,005463531 | 7,676061623 | 0,0013064 | 0,971476955 |
| 6463 | ENSG00000170035 | -0,245663529 | 4,897960015 | 5,6152685 | 0,049945862 |
| 6464 | ENSG00000170088 | 0,059672035  | 4,669869422 | 0,3356201 | 0,613395322 |
| 6465 | ENSG00000170089 | -0,225318556 | 3,717262839 | 1,4272266 | 0,244333519 |
| 6466 | ENSG00000170100 | -0,063276698 | 3,804708529 | 0,2278405 | 0,680791723 |
| 6467 | ENSG00000170113 | 0,11423963   | 3,964459443 | 0,729353  | 0,496466718 |
| 6468 | ENSG00000170142 | -0,195331209 | 5,411216933 | 0,9804416 | 0,332343262 |
| 6469 | ENSG00000170144 | 0,030052993  | 7,194419798 | 0,064754  | 0,801376553 |
| 6470 | ENSG00000170145 | 0,113860184  | 6,579659255 | 0,2937125 | 0,59303816  |
| 6471 | ENSG00000170153 | -0,155849483 | 6,816203845 | 0,6339583 | 0,434009489 |
| 6472 | ENSG00000170185 | -0,229958198 | 5,465591021 | 3,084829  | 0,092222972 |
| 6473 | ENSG00000170234 | 0,116135477  | 4,398554394 | 0,93939   | 0,406838735 |
| 6474 | ENSG00000170242 | -0,107637505 | 7,06158389  | 0,3232078 | 0,57516898  |
| 6475 | ENSG00000170248 | 0,007434098  | 6,94649604  | 0,004396  | 0,947705589 |
| 6476 | ENSG00000170266 | 0,020398261  | 4,637396833 | 0,0287964 | 0,933854931 |
| 6477 | ENSG00000170271 | 0,557961615  | 5,428344772 | 7,70111   | 0,010738939 |
| 6478 | ENSG00000170275 | 0,462505872  | 6,641921094 | 7,627442  | 0,01107142  |
| 6479 | ENSG00000170290 | 0,141115327  | 5,830521143 | 0,1226807 | 0,729316891 |
| 6480 | ENSG00000170291 | -0,101495245 | 4,130551721 | 0,6262403 | 0,506989477 |
| 6481 | ENSG00000170310 | -0,233882548 | 4,572190474 | 2,1390153 | 0,157059906 |
| 6482 | ENSG00000170315 | -0,008664758 | 7,37417181  | 0,0027185 | 0,958865813 |
| 6483 | ENSG00000170322 | 0,295829167  | 4,055848775 | 2,9553144 | 0,098962555 |
| 6484 | ENSG00000170323 | -0,021455662 | 7,965448082 | 0,0012518 | 0,972080354 |
| 6485 | ENSG00000170340 | 0,131462324  | 4,630853817 | 0,6055931 | 0,444345902 |
| 6486 | ENSG00000170345 | 1,243312083  | 7,049789808 | 5,0137111 | 0,035061619 |
| 6487 | ENSG00000170348 | 0,008318208  | 7,904784128 | 0,004053  | 0,949784051 |
| 6488 | ENSG00000170364 | -0,151425762 | 4,052090277 | 2,0873196 | 0,363870255 |

|      |                 |              |             |           |             |
|------|-----------------|--------------|-------------|-----------|-------------|
| 6489 | ENSG00000170365 | -0,000806652 | 3,811480748 | 2,979E-05 | 0,998813928 |
| 6490 | ENSG00000170385 | 0,49336177   | 5,868810715 | 3,790612  | 0,063792729 |
| 6491 | ENSG00000170390 | 0,079199444  | 3,766923695 | 0,2267239 | 0,714559629 |
| 6492 | ENSG00000170417 | -0,441254063 | 7,731153358 | 0,8511459 | 0,365759491 |
| 6493 | ENSG00000170421 | -0,014899154 | 6,300400222 | 0,0019436 | 0,965214582 |
| 6494 | ENSG00000170439 | -1,656665006 | 6,789002273 | 14,829814 | 0,000808398 |
| 6495 | ENSG00000170445 | -0,085986764 | 5,138487457 | 0,6202919 | 0,438913786 |
| 6496 | ENSG00000170448 | -2,032541968 | 5,719664372 | 18,295252 | 0,00027956  |
| 6497 | ENSG00000170456 | -0,029856686 | 6,158392712 | 0,0335207 | 0,856326574 |
| 6498 | ENSG00000170458 | -0,549801839 | 5,58431029  | 2,0014575 | 0,170479706 |
| 6499 | ENSG00000170464 | -0,17375639  | 4,316303925 | 1,4486973 | 0,240895302 |
| 6500 | ENSG00000170471 | 0,00058156   | 6,199179329 | 2,85E-05  | 0,995785954 |
| 6501 | ENSG00000170485 | -0,521130225 | 4,725045428 | 3,6839767 | 0,067366501 |
| 6502 | ENSG00000170500 | 0,294756214  | 6,075423788 | 1,2351732 | 0,277831038 |
| 6503 | ENSG00000170502 | -0,174047013 | 4,508569074 | 2,5391165 | 0,202189658 |
| 6504 | ENSG00000170515 | -0,122323021 | 5,22307233  | 1,2423686 | 0,27643189  |
| 6505 | ENSG00000170525 | -0,046668612 | 5,605031404 | 0,0098312 | 0,921872402 |
| 6506 | ENSG00000170540 | 0,349024013  | 5,625175269 | 1,6242819 | 0,215160824 |
| 6507 | ENSG00000170542 | 0,562899543  | 4,180837586 | 3,5421394 | 0,072479864 |
| 6508 | ENSG00000170558 | 0,343121265  | 7,876285844 | 1,8580111 | 0,18598727  |
| 6509 | ENSG00000170571 | 0,43725362   | 5,329036682 | 1,0016052 | 0,327285662 |
| 6510 | ENSG00000170581 | 0,444938603  | 5,942109078 | 3,9287917 | 0,059478467 |
| 6511 | ENSG00000170584 | 0,033674232  | 4,221630352 | 0,0524678 | 0,820835261 |
| 6512 | ENSG00000170606 | 0,011729684  | 6,936322902 | 0,0051946 | 0,94316322  |
| 6513 | ENSG00000170624 | 0,077640154  | 7,249987252 | 0,097478  | 0,757676696 |
| 6514 | ENSG00000170629 | -0,215908203 | 4,135721123 | 0,5266455 | 0,475305278 |
| 6515 | ENSG00000170632 | 0,260502312  | 4,713974563 | 3,7714853 | 0,064374145 |
| 6516 | ENSG00000170633 | -0,113630913 | 4,49083892  | 1,4087342 | 0,412507271 |
| 6517 | ENSG00000170634 | -0,123536093 | 4,958909949 | 0,4372306 | 0,515000208 |
| 6518 | ENSG00000170653 | 0,082342506  | 4,479006294 | 0,2096566 | 0,651312282 |
| 6519 | ENSG00000170667 | 0,395199284  | 4,113730316 | 1,86468   | 0,185229037 |
| 6520 | ENSG00000170677 | -0,235292934 | 5,498039812 | 1,7555469 | 0,198131634 |
| 6521 | ENSG00000170681 | 0,191439354  | 5,647506381 | 0,4088224 | 0,528854675 |
| 6522 | ENSG00000170759 | 0,039748673  | 8,313224914 | 0,0514006 | 0,822630671 |
| 6523 | ENSG00000170776 | -0,053939044 | 8,806365819 | 0,0569807 | 0,813437197 |
| 6524 | ENSG00000170791 | -0,323792874 | 5,172551553 | 1,979012  | 0,172799178 |
| 6525 | ENSG00000170801 | -0,081608282 | 5,695690167 | 0,0728332 | 0,789650422 |
| 6526 | ENSG00000170802 | -0,349611165 | 5,730725284 | 1,6078887 | 0,217413865 |
| 6527 | ENSG00000170807 | -0,14582522  | 9,100986992 | 0,2126851 | 0,648981503 |
| 6528 | ENSG00000170832 | -0,094399385 | 5,91197191  | 0,5165127 | 0,479511325 |
| 6529 | ENSG00000170836 | 0,078549294  | 3,825237808 | 0,2534527 | 0,663016593 |
| 6530 | ENSG00000170852 | 0,103322063  | 5,71024465  | 0,4564376 | 0,505997466 |
| 6531 | ENSG00000170854 | -0,24764995  | 4,282642282 | 3,4386941 | 0,118173682 |
| 6532 | ENSG00000170860 | -0,38496075  | 5,507630006 | 2,3319754 | 0,140310926 |
| 6533 | ENSG00000170871 | -0,197691239 | 7,272155301 | 1,5562479 | 0,224707856 |
| 6534 | ENSG00000170873 | -0,277376327 | 5,442324706 | 2,3767395 | 0,136735586 |
| 6535 | ENSG00000170876 | 0,283882805  | 6,198209132 | 3,5492814 | 0,07221006  |
| 6536 | ENSG00000170881 | -0,033276856 | 5,120752842 | 0,0425197 | 0,838437883 |
| 6537 | ENSG00000170889 | 0,309979119  | 7,572770605 | 1,6323044 | 0,214068889 |
| 6538 | ENSG00000170899 | 0,155931422  | 4,121367905 | 0,7367158 | 0,399528829 |
| 6539 | ENSG00000170903 | -0,23020227  | 5,032642868 | 1,8044507 | 0,192217269 |
| 6540 | ENSG00000170906 | -0,223917516 | 5,509974277 | 1,0414453 | 0,318049279 |
| 6541 | ENSG00000170919 | 0,166565718  | 5,050870594 | 0,8726625 | 0,359876906 |
| 6542 | ENSG00000170921 | 0,210246256  | 4,622970696 | 1,4316964 | 0,243617874 |
| 6543 | ENSG00000170946 | -0,051649334 | 4,594890453 | 0,0614389 | 0,806424824 |
| 6544 | ENSG00000170949 | 0,119597673  | 5,422746161 | 0,7468163 | 0,396342893 |
| 6545 | ENSG00000170954 | -0,234184235 | 4,641018226 | 1,1904518 | 0,286482472 |
| 6546 | ENSG00000170961 | -1,041954601 | 4,328737785 | 6,1548972 | 0,020812082 |
| 6547 | ENSG00000170962 | 1,076717823  | 5,683943856 | 10,81296  | 0,003205279 |



|      |                 |              |             |           |             |
|------|-----------------|--------------|-------------|-----------|-------------|
| 6548 | ENSG00000170989 | -0,230532538 | 5,792773579 | 2,364573  | 0,137696499 |
| 6549 | ENSG00000171016 | 0,119239107  | 4,242509556 | 0,4685631 | 0,500455951 |
| 6550 | ENSG00000171033 | 0,032099445  | 6,578752008 | 0,0103235 | 0,91994681  |
| 6551 | ENSG00000171055 | -0,235768761 | 6,187239504 | 2,5377106 | 0,124715683 |
| 6552 | ENSG00000171100 | 0,066968652  | 4,255454312 | 0,3817799 | 0,600749641 |
| 6553 | ENSG00000171105 | 0,081214909  | 6,814117948 | 0,1472412 | 0,704693012 |
| 6554 | ENSG00000171109 | -0,436029358 | 6,696844406 | 4,0457241 | 0,056085389 |
| 6555 | ENSG00000171115 | 0,075593319  | 4,900219178 | 0,1293592 | 0,722362822 |
| 6556 | ENSG00000171130 | 0,02383202   | 4,435824397 | 0,0103584 | 0,91981214  |
| 6557 | ENSG00000171132 | -0,264695475 | 4,509962055 | 2,6742754 | 0,115529122 |
| 6558 | ENSG00000171135 | -0,184740067 | 4,007180047 | 1,4964832 | 0,270295174 |
| 6559 | ENSG00000171148 | 0,07562656   | 5,263568701 | 0,1618403 | 0,691164161 |
| 6560 | ENSG00000171150 | 0,150794513  | 5,639793786 | 1,5554775 | 0,224775831 |
| 6561 | ENSG00000171155 | -0,345441276 | 4,661370168 | 2,7813565 | 0,108861234 |
| 6562 | ENSG00000171161 | -0,213941006 | 4,514054945 | 1,8178348 | 0,190636713 |
| 6563 | ENSG00000171202 | -0,703323252 | 5,069907041 | 7,7682759 | 0,01044539  |
| 6564 | ENSG00000171204 | -0,49619585  | 5,23398815  | 4,5456554 | 0,043849474 |
| 6565 | ENSG00000171206 | -0,08998391  | 5,418012411 | 0,1443717 | 0,707442183 |
| 6566 | ENSG00000171223 | 0,382559976  | 6,254745544 | 1,2745476 | 0,27049719  |
| 6567 | ENSG00000171262 | -0,200969845 | 5,070374544 | 1,9958305 | 0,171032009 |
| 6568 | ENSG00000171291 | -0,138069685 | 3,623778476 | 1,0642196 | 0,484626922 |
| 6569 | ENSG00000171295 | 0,043137982  | 3,879658638 | 0,1246934 | 0,806983695 |
| 6570 | ENSG00000171302 | -0,010264093 | 4,195708791 | 0,0044319 | 0,947494425 |
| 6571 | ENSG00000171303 | -0,629250974 | 4,839071349 | 7,545997  | 0,011452291 |
| 6572 | ENSG00000171307 | -0,266275484 | 4,178900918 | 4,1392891 | 0,091677068 |
| 6573 | ENSG00000171310 | 0,029479759  | 4,179413782 | 0,0540321 | 0,833723205 |
| 6574 | ENSG00000171311 | 0,146917391  | 3,822543719 | 1,2435863 | 0,39936911  |
| 6575 | ENSG00000171314 | -0,010025898 | 7,510848377 | 0,0069487 | 0,934281495 |
| 6576 | ENSG00000171316 | -0,228586068 | 5,40089214  | 1,5460097 | 0,226190392 |
| 6577 | ENSG00000171365 | 0,083456596  | 3,578137793 | 0,2564664 | 0,670325796 |
| 6578 | ENSG00000171385 | -0,343303349 | 5,041220553 | 2,8669971 | 0,103850656 |
| 6579 | ENSG00000171408 | 0,266252106  | 4,503635262 | 1,4869505 | 0,234988593 |
| 6580 | ENSG00000171444 | 0,248502015  | 6,14482122  | 1,7719861 | 0,196118734 |
| 6581 | ENSG00000171448 | -0,14071701  | 3,514972241 | 1,2354335 | 0,497308576 |
| 6582 | ENSG00000171451 | 0,27777168   | 4,378673315 | 0,7503749 | 0,395261092 |
| 6583 | ENSG00000171456 | 0,015284986  | 5,899341446 | 0,0066177 | 0,935864569 |
| 6584 | ENSG00000171466 | 0,010410867  | 5,4366301   | 0,011704  | 0,914779197 |
| 6585 | ENSG00000171467 | 0,136167897  | 4,650174666 | 0,5228892 | 0,476866434 |
| 6586 | ENSG00000171469 | 0,100127892  | 4,663070974 | 0,7344675 | 0,400207467 |
| 6587 | ENSG00000171475 | 0,259120069  | 4,461225636 | 2,0308758 | 0,167496615 |
| 6588 | ENSG00000171488 | -0,113506013 | 5,020061676 | 0,6425124 | 0,430954972 |
| 6589 | ENSG00000171490 | 0,075836799  | 6,529811779 | 0,5203512 | 0,477901016 |
| 6590 | ENSG00000171492 | 0,213107853  | 3,773351564 | 2,3539893 | 0,234818419 |
| 6591 | ENSG00000171497 | -0,185834065 | 4,981258442 | 1,6063968 | 0,217612102 |
| 6592 | ENSG00000171503 | -0,377125206 | 6,88554089  | 3,174399  | 0,087946364 |
| 6593 | ENSG00000171517 | -0,499149266 | 4,685416228 | 4,5812886 | 0,043099658 |
| 6594 | ENSG00000171530 | -0,169335991 | 5,442422226 | 0,8433665 | 0,367920464 |
| 6595 | ENSG00000171552 | -0,030937168 | 4,288233346 | 0,0235536 | 0,879358327 |
| 6596 | ENSG00000171566 | -0,151885734 | 5,517036706 | 0,555405  | 0,463629365 |
| 6597 | ENSG00000171603 | 0,202162691  | 6,039752344 | 0,8326652 | 0,3709234   |
| 6598 | ENSG00000171604 | -0,155547453 | 4,516554827 | 1,5420892 | 0,25327818  |
| 6599 | ENSG00000171606 | 0,078293711  | 4,795069298 | 0,3903996 | 0,618977296 |
| 6600 | ENSG00000171612 | -0,173419133 | 4,046391424 | 0,5787002 | 0,454513639 |
| 6601 | ENSG00000171617 | 0,08409016   | 4,733350303 | 0,070186  | 0,793414546 |
| 6602 | ENSG00000171621 | -0,81349845  | 4,056692353 | 11,88119  | 0,002182905 |
| 6603 | ENSG00000171634 | 0,119533535  | 6,946650443 | 0,8262609 | 0,372705072 |
| 6604 | ENSG00000171659 | 0,399840204  | 4,228985519 | 0,8901139 | 0,355204814 |
| 6605 | ENSG00000171681 | 0,139849849  | 6,999136193 | 1,6618253 | 0,210065993 |
| 6606 | ENSG00000171714 | -0,046804925 | 7,328849987 | 0,0226479 | 0,881682018 |

|      |                 |              |             |           |             |
|------|-----------------|--------------|-------------|-----------|-------------|
| 6607 | ENSG00000171720 | 0,120495174  | 4,53509462  | 0,9009012 | 0,493734181 |
| 6608 | ENSG00000171723 | -0,086770307 | 4,579841114 | 0,6278972 | 0,516972626 |
| 6609 | ENSG00000171724 | 0,865287505  | 4,733223006 | 11,157508 | 0,002827373 |
| 6610 | ENSG00000171735 | -0,255068964 | 5,201500745 | 2,4928979 | 0,127950607 |
| 6611 | ENSG00000171766 | 0,730024384  | 5,378816689 | 8,9012187 | 0,006620368 |
| 6612 | ENSG00000171791 | -0,07930499  | 5,308427421 | 0,1532629 | 0,699022553 |
| 6613 | ENSG00000171793 | -0,188728609 | 3,980108537 | 0,654493  | 0,426760799 |
| 6614 | ENSG00000171817 | 0,022306036  | 3,980011592 | 0,0222846 | 0,887918231 |
| 6615 | ENSG00000171824 | 0,000860139  | 4,899521884 | 5,799E-05 | 0,993989126 |
| 6616 | ENSG00000171827 | 0,13110768   | 4,179791602 | 1,2312944 | 0,375154417 |
| 6617 | ENSG00000171843 | -0,122016118 | 4,138210479 | 1,0557588 | 0,461974009 |
| 6618 | ENSG00000171853 | -0,198675424 | 5,039365002 | 1,7145191 | 0,203268023 |
| 6619 | ENSG00000171858 | 0,299125319  | 6,398787851 | 2,9293727 | 0,100370046 |
| 6620 | ENSG00000171860 | -0,334853086 | 3,770282568 | 1,6782834 | 0,207942659 |
| 6621 | ENSG00000171862 | -0,030461226 | 7,660270408 | 0,0213858 | 0,885000784 |
| 6622 | ENSG00000171863 | 0,00626833   | 7,869289098 | 0,0008344 | 0,977203577 |
| 6623 | ENSG00000171865 | 0,132531376  | 4,520010303 | 1,3324071 | 0,36553483  |
| 6624 | ENSG00000171867 | 0,19538325   | 7,636827324 | 1,4862422 | 0,235067437 |
| 6625 | ENSG00000171877 | -0,178597672 | 4,770566708 | 0,4055055 | 0,530516655 |
| 6626 | ENSG00000171914 | 0,116504131  | 6,191602693 | 0,1865321 | 0,669821102 |
| 6627 | ENSG00000171928 | -0,079979221 | 5,26026177  | 0,1356266 | 0,716019558 |
| 6628 | ENSG00000171940 | 0,182621489  | 4,679030369 | 0,5692122 | 0,458190826 |
| 6629 | ENSG00000171943 | 0,332970452  | 5,641959394 | 1,7751625 | 0,195732719 |
| 6630 | ENSG00000171988 | -0,061248535 | 7,355656541 | 0,1080796 | 0,745301396 |
| 6631 | ENSG00000171992 | 0,042126202  | 8,903790046 | 0,0347366 | 0,853774944 |
| 6632 | ENSG00000172007 | 0,154493582  | 4,242529939 | 1,3012632 | 0,265624856 |
| 6633 | ENSG00000172014 | -0,284114065 | 4,198206913 | 0,9330579 | 0,344068773 |
| 6634 | ENSG00000172037 | 0,394853985  | 8,52649434  | 2,4529876 | 0,130891448 |
| 6635 | ENSG00000172046 | 0,25968408   | 5,276024693 | 1,6988174 | 0,205277423 |
| 6636 | ENSG00000172053 | -0,141216482 | 6,392952923 | 1,232414  | 0,27831528  |
| 6637 | ENSG00000172057 | 0,512566222  | 5,276117973 | 7,7978997 | 0,010318743 |
| 6638 | ENSG00000172058 | 0,273763308  | 4,056358448 | 3,1578009 | 0,117352361 |
| 6639 | ENSG00000172059 | 0,40198883   | 4,797488722 | 5,0882927 | 0,033853021 |
| 6640 | ENSG00000172062 | 0,281246467  | 4,895311966 | 2,8261411 | 0,106206681 |
| 6641 | ENSG00000172071 | 0,291687362  | 4,606979191 | 1,2541332 | 0,274267369 |
| 6642 | ENSG00000172086 | -0,184650215 | 5,018268674 | 0,8617282 | 0,3628492   |
| 6643 | ENSG00000172113 | -0,182594698 | 3,994334227 | 3,2770636 | 0,274142285 |
| 6644 | ENSG00000172115 | -0,745128083 | 9,026049829 | 4,3977992 | 0,047121847 |
| 6645 | ENSG00000172159 | -0,225764459 | 6,023500724 | 0,6552585 | 0,42649427  |
| 6646 | ENSG00000172164 | -0,20475907  | 3,857419018 | 0,6689519 | 0,421769432 |
| 6647 | ENSG00000172172 | -0,523058569 | 4,93344687  | 5,7702211 | 0,02472627  |
| 6648 | ENSG00000172175 | -0,075383721 | 5,350372981 | 0,2391496 | 0,629429518 |
| 6649 | ENSG00000172197 | 0,071382652  | 3,729772494 | 0,1831944 | 0,728231621 |
| 6650 | ENSG00000172201 | 2,945856109  | 6,155479361 | 31,425504 | 1,03339E-05 |
| 6651 | ENSG00000172209 | -0,044710801 | 5,582594764 | 0,0123311 | 0,912538958 |
| 6652 | ENSG00000172216 | 0,297098298  | 4,585671227 | 1,4966857 | 0,2335088   |
| 6653 | ENSG00000172239 | -0,118702617 | 6,134373042 | 0,9516583 | 0,339363016 |
| 6654 | ENSG00000172260 | -0,257205727 | 5,347587123 | 1,0053249 | 0,326407762 |
| 6655 | ENSG00000172262 | 0,021863868  | 4,646896178 | 0,0385757 | 0,84600233  |
| 6656 | ENSG00000172270 | -0,039767271 | 8,703453421 | 0,0315496 | 0,860567229 |
| 6657 | ENSG00000172292 | -0,267000228 | 6,364105715 | 1,3208801 | 0,262188711 |
| 6658 | ENSG00000172296 | 0,050969369  | 4,021128515 | 0,0823594 | 0,776682221 |
| 6659 | ENSG00000172301 | 0,111969961  | 4,784569692 | 0,6927573 | 0,413716248 |
| 6660 | ENSG00000172315 | -0,127237346 | 3,697254678 | 0,9305244 | 0,508545374 |
| 6661 | ENSG00000172331 | -0,473628011 | 4,271943761 | 3,6633815 | 0,068082745 |
| 6662 | ENSG00000172340 | -0,115248089 | 6,612171829 | 0,3771179 | 0,545147514 |
| 6663 | ENSG00000172346 | -0,403724451 | 6,44637639  | 2,4065706 | 0,134413008 |
| 6664 | ENSG00000172348 | -0,50408413  | 7,586379686 | 7,7844564 | 0,010376005 |
| 6665 | ENSG00000172349 | 0,514264152  | 3,917975791 | 3,5446199 | 0,072386709 |

|      |                 |              |             |           |             |
|------|-----------------|--------------|-------------|-----------|-------------|
| 6666 | ENSG00000172354 | -0,03196208  | 5,514591455 | 0,0236512 | 0,879110634 |
| 6667 | ENSG00000172380 | 0,477805912  | 6,52517169  | 3,2145485 | 0,086084887 |
| 6668 | ENSG00000172399 | -0,748437589 | 9,972446762 | 3,8054824 | 0,063311743 |
| 6669 | ENSG00000172403 | -0,317943316 | 7,846227543 | 4,4107138 | 0,046785539 |
| 6670 | ENSG00000172428 | -0,206998199 | 4,778848315 | 1,6395764 | 0,213085091 |
| 6671 | ENSG00000172432 | 0,013411876  | 4,514615372 | 0,0064934 | 0,93646844  |
| 6672 | ENSG00000172456 | 0,188268169  | 4,179402731 | 0,9045861 | 0,351395601 |
| 6673 | ENSG00000172465 | -0,318898887 | 4,153475964 | 2,8597994 | 0,104261268 |
| 6674 | ENSG00000172466 | -0,088340717 | 6,952812134 | 0,3799542 | 0,543635434 |
| 6675 | ENSG00000172469 | -0,147248857 | 4,389893977 | 0,4176318 | 0,52448662  |
| 6676 | ENSG00000172493 | -0,129553865 | 7,176321849 | 0,8529227 | 0,365235485 |
| 6677 | ENSG00000172500 | 0,022503887  | 4,449606818 | 0,0223198 | 0,941580812 |
| 6678 | ENSG00000172531 | -0,017904476 | 5,175952299 | 0,0132866 | 0,909228673 |
| 6679 | ENSG00000172534 | 0,085817163  | 4,746605633 | 0,0992334 | 0,755577981 |
| 6680 | ENSG00000172572 | -0,292293356 | 8,210185508 | 0,9654735 | 0,335986077 |
| 6681 | ENSG00000172575 | -0,045553734 | 3,774225692 | 0,0465955 | 0,830990583 |
| 6682 | ENSG00000172586 | -0,461550838 | 4,158311824 | 9,7276621 | 0,006037114 |
| 6683 | ENSG00000172590 | -0,1800941   | 4,333030929 | 1,0550518 | 0,314976804 |
| 6684 | ENSG00000172638 | 0,253229391  | 5,499198424 | 2,6467946 | 0,117316767 |
| 6685 | ENSG00000172661 | -0,309234966 | 6,941021534 | 2,0089785 | 0,169710963 |
| 6686 | ENSG00000172667 | 0,365602301  | 5,724598968 | 2,6215448 | 0,118987972 |
| 6687 | ENSG00000172671 | -0,19906789  | 4,072913165 | 2,3655774 | 0,220266598 |
| 6688 | ENSG00000172716 | 0,105259923  | 5,656191301 | 0,3066451 | 0,585064179 |
| 6689 | ENSG00000172728 | 0,480230325  | 3,736543264 | 4,887778  | 0,037213787 |
| 6690 | ENSG00000172731 | -0,508918497 | 4,912459244 | 3,6223053 | 0,069537391 |
| 6691 | ENSG00000172757 | -0,083793294 | 6,847179871 | 0,2551155 | 0,618278359 |
| 6692 | ENSG00000172765 | 0,077504681  | 5,422516918 | 0,4511961 | 0,508403338 |
| 6693 | ENSG00000172766 | -0,023195473 | 4,453729482 | 0,0268639 | 0,888515084 |
| 6694 | ENSG00000172775 | -0,186795053 | 5,510667426 | 3,8588597 | 0,071433562 |
| 6695 | ENSG00000172785 | -0,347968078 | 6,110950285 | 4,4977215 | 0,04488142  |
| 6696 | ENSG00000172795 | 0,160539269  | 5,929169952 | 0,9189296 | 0,347677218 |
| 6697 | ENSG00000172809 | 0,120828652  | 7,428550292 | 0,578185  | 0,4546963   |
| 6698 | ENSG00000172817 | -0,228313263 | 4,80475125  | 2,5622099 | 0,123007428 |
| 6699 | ENSG00000172831 | 0,353385496  | 5,07755573  | 3,5149512 | 0,07350996  |
| 6700 | ENSG00000172845 | 0,059023277  | 6,614181295 | 0,1180876 | 0,734224394 |
| 6701 | ENSG00000172869 | -0,058833135 | 6,882346838 | 0,1995404 | 0,659235185 |
| 6702 | ENSG00000172888 | 0,110795868  | 4,68511949  | 0,6558875 | 0,426249502 |
| 6703 | ENSG00000172890 | 0,117917308  | 4,587001103 | 0,5459593 | 0,467411305 |
| 6704 | ENSG00000172893 | -0,05327982  | 4,342127803 | 0,0566734 | 0,813931056 |
| 6705 | ENSG00000172915 | -0,117779723 | 6,810204237 | 0,3079029 | 0,584300525 |
| 6706 | ENSG00000172939 | 0,091549564  | 5,567829631 | 0,7878497 | 0,383863291 |
| 6707 | ENSG00000172943 | 0,236209083  | 4,323681984 | 1,4278113 | 0,244239748 |
| 6708 | ENSG00000172954 | -0,163237598 | 4,867383825 | 0,7164079 | 0,406003212 |
| 6709 | ENSG00000172965 | 0,404794281  | 4,618198028 | 5,6138281 | 0,026546724 |
| 6710 | ENSG00000172974 | -0,402023727 | 6,256454868 | 7,0584486 | 0,014056096 |
| 6711 | ENSG00000172986 | 0,511761437  | 5,187649942 | 5,8599293 | 0,023745101 |
| 6712 | ENSG00000172992 | 0,266340993  | 4,007593055 | 3,4606383 | 0,142092531 |
| 6713 | ENSG00000173011 | -0,108024397 | 4,529870885 | 0,3650224 | 0,551614983 |
| 6714 | ENSG00000173020 | 0,043338079  | 5,103984719 | 0,0722037 | 0,790538778 |
| 6715 | ENSG00000173039 | -0,025864798 | 4,744578026 | 0,0219797 | 0,883427008 |
| 6716 | ENSG00000173041 | -0,141415433 | 5,887271716 | 0,6816212 | 0,417469716 |
| 6717 | ENSG00000173064 | 0,092596217  | 6,000800637 | 0,1839368 | 0,671982565 |
| 6718 | ENSG00000173068 | 0,160504172  | 5,844979727 | 0,1742057 | 0,680252448 |
| 6719 | ENSG00000173085 | -0,332056122 | 4,078734728 | 3,3142499 | 0,08165551  |
| 6720 | ENSG00000173113 | 0,289415404  | 4,878432042 | 2,6676171 | 0,115959297 |
| 6721 | ENSG00000173114 | -1,831260658 | 5,442526076 | 18,744552 | 0,000245368 |
| 6722 | ENSG00000173120 | 0,123307398  | 5,892337022 | 0,4436128 | 0,511977366 |
| 6723 | ENSG00000173141 | -0,214785291 | 4,657001648 | 2,5636226 | 0,122881417 |
| 6724 | ENSG00000173145 | -0,052876223 | 4,900784633 | 0,0670397 | 0,797988796 |

|      |                 |              |             |           |             |
|------|-----------------|--------------|-------------|-----------|-------------|
| 6725 | ENSG00000173153 | -0,241039163 | 5,614098218 | 1,2289251 | 0,279018793 |
| 6726 | ENSG00000173163 | -0,22671264  | 5,162098775 | 1,6798155 | 0,207742325 |
| 6727 | ENSG00000173166 | 0,00247752   | 4,232597139 | 0,0001231 | 0,991242906 |
| 6728 | ENSG00000173175 | 0,138237741  | 6,992042518 | 0,23767   | 0,630486264 |
| 6729 | ENSG00000173193 | 0,019672958  | 6,595734084 | 0,0083915 | 0,927801065 |
| 6730 | ENSG00000173207 | -0,055951008 | 3,666181905 | 0,0772565 | 0,795158988 |
| 6731 | ENSG00000173208 | -0,174459439 | 5,024439673 | 0,385992  | 0,540493417 |
| 6732 | ENSG00000173209 | 0,166729428  | 5,348676947 | 1,166863  | 0,291190179 |
| 6733 | ENSG00000173210 | -0,114619664 | 6,988036895 | 0,2829144 | 0,599873217 |
| 6734 | ENSG00000173214 | -0,001823875 | 5,092354371 | 6,396E-05 | 0,993687839 |
| 6735 | ENSG00000173218 | 0,187456435  | 3,801749557 | 1,8608482 | 0,325684607 |
| 6736 | ENSG00000173221 | -0,356445641 | 5,642520106 | 4,1994389 | 0,051953876 |
| 6737 | ENSG00000173226 | 0,201504796  | 4,095550013 | 1,9474039 | 0,18803006  |
| 6738 | ENSG00000173230 | 0,068898671  | 8,330276187 | 0,3024487 | 0,587608754 |
| 6739 | ENSG00000173258 | 0,453263588  | 6,189515176 | 6,0320886 | 0,021981219 |
| 6740 | ENSG00000173269 | -0,107727735 | 5,709294353 | 0,5011735 | 0,486063399 |
| 6741 | ENSG00000173273 | 0,113787948  | 6,070517315 | 0,932883  | 0,344078535 |
| 6742 | ENSG00000173275 | -0,446409516 | 4,210068681 | 4,3699603 | 0,047768327 |
| 6743 | ENSG00000173276 | 0,0816751    | 4,633522875 | 0,1262569 | 0,725567233 |
| 6744 | ENSG00000173281 | -0,247148234 | 5,949642794 | 3,4880361 | 0,074501524 |
| 6745 | ENSG00000173320 | -0,466315171 | 4,947171458 | 14,602273 | 0,000865864 |
| 6746 | ENSG00000173327 | 0,073018198  | 4,47860882  | 0,1992909 | 0,764990088 |
| 6747 | ENSG00000173334 | 0,443422602  | 5,400477699 | 1,4824046 | 0,235683682 |
| 6748 | ENSG00000173369 | -0,270913902 | 5,992979027 | 0,6153953 | 0,440730211 |
| 6749 | ENSG00000173372 | -0,10360787  | 5,701411801 | 0,1120656 | 0,740823673 |
| 6750 | ENSG00000173402 | -0,064704109 | 6,420597354 | 0,0861035 | 0,771809047 |
| 6751 | ENSG00000173409 | -0,369953048 | 4,486909517 | 3,4865704 | 0,074603172 |
| 6752 | ENSG00000173418 | -0,067974877 | 5,093028603 | 0,2866333 | 0,72131403  |
| 6753 | ENSG00000173436 | -0,579240938 | 4,486684363 | 18,975597 | 0,000228035 |
| 6754 | ENSG00000173442 | 0,223205754  | 5,957389613 | 1,6370739 | 0,213423002 |
| 6755 | ENSG00000173451 | -0,229463377 | 3,817000685 | 0,9396732 | 0,342397279 |
| 6756 | ENSG00000173457 | -0,395130236 | 4,799602128 | 2,4936165 | 0,127898375 |
| 6757 | ENSG00000173473 | 0,301409197  | 5,568033195 | 5,1403017 | 0,033002617 |
| 6758 | ENSG00000173480 | 0,17321542   | 4,814669995 | 2,2243581 | 0,161053961 |
| 6759 | ENSG00000173482 | 0,011396015  | 7,107173308 | 0,0040667 | 0,949701008 |
| 6760 | ENSG00000173511 | -0,046756577 | 6,291761055 | 0,0559225 | 0,815143867 |
| 6761 | ENSG00000173517 | 0,251805566  | 7,071373051 | 2,4385265 | 0,131976734 |
| 6762 | ENSG00000173542 | 0,044942053  | 5,5909181   | 0,0796588 | 0,780272256 |
| 6763 | ENSG00000173545 | -0,126561028 | 4,619993838 | 0,4534074 | 0,507399188 |
| 6764 | ENSG00000173546 | 0,131214437  | 4,475573742 | 0,1382029 | 0,71346057  |
| 6765 | ENSG00000173548 | 0,550104319  | 4,72051558  | 5,6533107 | 0,026073434 |
| 6766 | ENSG00000173559 | -0,303432157 | 5,943591604 | 0,2842588 | 0,599013107 |
| 6767 | ENSG00000173575 | 0,141756539  | 6,753726427 | 1,0922377 | 0,306746302 |
| 6768 | ENSG00000173588 | -0,446809299 | 5,235316304 | 3,9366204 | 0,059244153 |
| 6769 | ENSG00000173598 | -0,211051265 | 7,930920025 | 1,6847796 | 0,207050607 |
| 6770 | ENSG00000173611 | 0,264237445  | 4,468651884 | 3,874734  | 0,061082638 |
| 6771 | ENSG00000173614 | -0,124091063 | 4,37915014  | 0,6820833 | 0,417311457 |
| 6772 | ENSG00000173641 | -0,223332873 | 9,769560722 | 0,7383851 | 0,399003584 |
| 6773 | ENSG00000173660 | -0,691902389 | 8,051182899 | 7,5133924 | 0,011608801 |
| 6774 | ENSG00000173674 | 0,008120329  | 6,444638634 | 0,0022353 | 0,962697122 |
| 6775 | ENSG00000173681 | -0,07790314  | 4,606216093 | 0,4159298 | 0,600033833 |
| 6776 | ENSG00000173692 | -0,236671409 | 6,785238375 | 2,3086003 | 0,142222104 |
| 6777 | ENSG00000173706 | 0,188325958  | 7,959436654 | 0,7313066 | 0,401238071 |
| 6778 | ENSG00000173726 | 0,123991217  | 6,942892878 | 1,6347737 | 0,213690343 |
| 6779 | ENSG00000173744 | -0,277433636 | 6,482190194 | 3,0591685 | 0,093552612 |
| 6780 | ENSG00000173757 | 0,28897727   | 5,862720034 | 2,7313415 | 0,11191795  |
| 6781 | ENSG00000173786 | 0,078663961  | 4,759992513 | 0,1742579 | 0,68020736  |
| 6782 | ENSG00000173801 | 0,176495173  | 6,4384313   | 0,6975379 | 0,412162675 |
| 6783 | ENSG00000173812 | -0,016583125 | 8,357022872 | 0,0138609 | 0,907293463 |

|      |                 |              |             |           |             |
|------|-----------------|--------------|-------------|-----------|-------------|
| 6784 | ENSG00000173821 | 0,176137813  | 7,108084436 | 0,4862361 | 0,492566276 |
| 6785 | ENSG00000173848 | 0,123768731  | 5,355025801 | 0,2263841 | 0,638684401 |
| 6786 | ENSG00000173852 | 0,182791769  | 5,433725886 | 1,0999611 | 0,305118346 |
| 6787 | ENSG00000173875 | 0,098873723  | 5,173622819 | 0,9017788 | 0,352095967 |
| 6788 | ENSG00000173889 | 0,126740196  | 6,932940886 | 0,9146739 | 0,348740395 |
| 6789 | ENSG00000173905 | 0,150948404  | 6,418735126 | 1,3332988 | 0,259977668 |
| 6790 | ENSG00000173914 | -0,100980102 | 4,256025302 | 0,7909266 | 0,477250589 |
| 6791 | ENSG00000173915 | -0,690767995 | 7,271615705 | 5,204574  | 0,03206065  |
| 6792 | ENSG00000173918 | -0,405161891 | 6,922383359 | 1,334716  | 0,259772252 |
| 6793 | ENSG00000173926 | 0,060193231  | 3,917134598 | 0,1321888 | 0,767135529 |
| 6794 | ENSG00000173933 | -0,346786705 | 4,290813104 | 3,760612  | 0,064775815 |
| 6795 | ENSG00000173960 | 0,101139685  | 5,168833133 | 1,0344872 | 0,349592641 |
| 6796 | ENSG00000173991 | -0,662800884 | 10,41707015 | 3,1244958 | 0,090325199 |
| 6797 | ENSG00000174010 | 0,128901045  | 4,616822295 | 0,500998  | 0,486138935 |
| 6798 | ENSG00000174013 | -0,214529408 | 4,01197262  | 3,1265815 | 0,205397884 |
| 6799 | ENSG00000174032 | -0,045627361 | 5,870385403 | 0,0346933 | 0,853864885 |
| 6800 | ENSG00000174059 | -0,304927055 | 6,777027707 | 1,6351636 | 0,213681413 |
| 6801 | ENSG00000174080 | 0,319389763  | 5,959266435 | 3,5517235 | 0,07212069  |
| 6802 | ENSG00000174099 | 0,141863072  | 7,308332483 | 1,7632538 | 0,19713999  |
| 6803 | ENSG00000174106 | 0,067112409  | 4,947904011 | 0,2545839 | 0,618625833 |
| 6804 | ENSG00000174125 | 0,251131914  | 3,942100884 | 0,8417365 | 0,368375581 |
| 6805 | ENSG00000174132 | -0,008786227 | 3,69514507  | 0,0022157 | 0,994884975 |
| 6806 | ENSG00000174173 | -0,459993064 | 4,663752584 | 3,830007  | 0,062527482 |
| 6807 | ENSG00000174175 | 0,86044581   | 4,364243609 | 7,595581  | 0,011218724 |
| 6808 | ENSG00000174197 | 0,069138867  | 7,042364631 | 0,439604  | 0,513849638 |
| 6809 | ENSG00000174227 | -0,086555853 | 4,566710574 | 0,2877581 | 0,596786667 |
| 6810 | ENSG00000174231 | 0,136508271  | 7,525548863 | 0,437609  | 0,514820073 |
| 6811 | ENSG00000174233 | 0,846018995  | 6,632725519 | 7,8041375 | 0,010292292 |
| 6812 | ENSG00000174238 | 0,019171538  | 5,269630389 | 0,0162094 | 0,899791526 |
| 6813 | ENSG00000174243 | 0,128523204  | 5,396684044 | 0,7748408 | 0,387772278 |
| 6814 | ENSG00000174282 | 0,267599202  | 6,343192527 | 2,0585487 | 0,164748068 |
| 6815 | ENSG00000174306 | 0,061619182  | 5,617886453 | 0,0716373 | 0,79134162  |
| 6816 | ENSG00000174348 | -0,24958928  | 5,460149476 | 1,0135399 | 0,324480424 |
| 6817 | ENSG00000174353 | -0,012702824 | 4,444911601 | 0,0031301 | 0,955864754 |
| 6818 | ENSG00000174373 | -0,003953586 | 6,930154476 | 0,0007632 | 0,978196164 |
| 6819 | ENSG00000174405 | -0,201986699 | 4,5675924   | 1,189757  | 0,28661968  |
| 6820 | ENSG00000174428 | 0,007112739  | 5,590820123 | 0,0022786 | 0,962337583 |
| 6821 | ENSG00000174429 | -0,574696847 | 5,042199527 | 2,5374026 | 0,124762798 |
| 6822 | ENSG00000174437 | -0,867945334 | 11,3319032  | 8,3322325 | 0,008302203 |
| 6823 | ENSG00000174444 | 0,153074807  | 9,616138546 | 0,4705466 | 0,499542026 |
| 6824 | ENSG00000174446 | -0,322515727 | 4,38689944  | 3,2681718 | 0,083669135 |
| 6825 | ENSG00000174485 | 0,066888516  | 6,149975138 | 0,1727483 | 0,68151429  |
| 6826 | ENSG00000174501 | 0,040994997  | 6,635690794 | 0,0698059 | 0,793961264 |
| 6827 | ENSG00000174502 | 0,199744127  | 4,337878959 | 0,5340053 | 0,472271177 |
| 6828 | ENSG00000174547 | -0,29114379  | 4,441480095 | 2,9457982 | 0,099476188 |
| 6829 | ENSG00000174574 | -0,201434444 | 5,532878923 | 2,0515666 | 0,165400863 |
| 6830 | ENSG00000174579 | 0,137575293  | 4,805408707 | 0,94537   | 0,340947672 |
| 6831 | ENSG00000174600 | 0,262060224  | 4,237761046 | 1,6787154 | 0,207886147 |
| 6832 | ENSG00000174606 | 0,003799559  | 5,011092312 | 0,0006062 | 0,980568885 |
| 6833 | ENSG00000174640 | -0,542966158 | 4,480640031 | 2,7487973 | 0,110839858 |
| 6834 | ENSG00000174652 | 0,152272316  | 4,699251368 | 0,8342958 | 0,37046352  |
| 6835 | ENSG00000174684 | 0,140420809  | 4,95781138  | 0,6376051 | 0,432708136 |
| 6836 | ENSG00000174695 | -0,070552834 | 6,429533771 | 0,1399584 | 0,711732531 |
| 6837 | ENSG00000174705 | -0,824976166 | 4,400146001 | 6,216946  | 0,020247794 |
| 6838 | ENSG00000174718 | 0,108294125  | 6,388240769 | 0,2405085 | 0,628462589 |
| 6839 | ENSG00000174720 | -0,307827288 | 5,863592914 | 2,4038539 | 0,134622574 |
| 6840 | ENSG00000174738 | 0,343588527  | 6,651701881 | 2,5664753 | 0,122730931 |
| 6841 | ENSG00000174748 | 0,368183647  | 8,617583167 | 3,2775033 | 0,083256772 |
| 6842 | ENSG00000174749 | 0,033552841  | 4,640674844 | 0,0334034 | 0,856575436 |

|      |                 |              |             |           |             |
|------|-----------------|--------------|-------------|-----------|-------------|
| 6843 | ENSG00000174780 | 0,095416242  | 5,799959984 | 0,39436   | 0,536172655 |
| 6844 | ENSG00000174796 | -0,069434979 | 4,563887941 | 0,1660432 | 0,687402138 |
| 6845 | ENSG00000174804 | 0,395433033  | 6,602712041 | 2,0216716 | 0,168423096 |
| 6846 | ENSG00000174839 | 0,045128372  | 5,017249507 | 0,0920294 | 0,764326709 |
| 6847 | ENSG00000174840 | 0,015054138  | 4,73923815  | 0,0116907 | 0,914828142 |
| 6848 | ENSG00000174842 | -0,177618167 | 3,756478038 | 0,8021009 | 0,37969899  |
| 6849 | ENSG00000174891 | -0,714404109 | 5,052949209 | 17,920172 | 0,000312097 |
| 6850 | ENSG00000174903 | -0,003882115 | 4,646355414 | 0,0004169 | 0,983884486 |
| 6851 | ENSG00000174917 | -0,271255893 | 5,160567152 | 1,3792718 | 0,252184099 |
| 6852 | ENSG00000174953 | 0,005189866  | 6,161144783 | 0,0023121 | 0,962060601 |
| 6853 | ENSG00000174977 | -0,140888312 | 3,635642264 | 0,8094784 | 0,512854661 |
| 6854 | ENSG00000175029 | -0,169265307 | 4,875059136 | 1,7990667 | 0,192812582 |
| 6855 | ENSG00000175048 | 0,382510829  | 3,739873854 | 3,2108019 | 0,086256657 |
| 6856 | ENSG00000175054 | -0,167648293 | 6,005612428 | 1,5342715 | 0,22786244  |
| 6857 | ENSG00000175061 | 0,558020392  | 6,230749575 | 8,071077  | 0,009227507 |
| 6858 | ENSG00000175066 | 0,151105766  | 4,873841978 | 0,6776134 | 0,418822536 |
| 6859 | ENSG00000175073 | 0,004519056  | 5,97311433  | 0,0013343 | 0,971174282 |
| 6860 | ENSG00000175084 | -0,17142428  | 11,7091031  | 0,3606328 | 0,553982037 |
| 6861 | ENSG00000175087 | -0,116881692 | 3,687543744 | 0,4011091 | 0,594838369 |
| 6862 | ENSG00000175104 | 0,029391294  | 5,073542442 | 0,0602449 | 0,825229295 |
| 6863 | ENSG00000175105 | -0,035500883 | 5,150978634 | 0,032696  | 0,858084807 |
| 6864 | ENSG00000175106 | -0,219498661 | 4,045542069 | 1,5170274 | 0,23326026  |
| 6865 | ENSG00000175110 | -0,563155192 | 5,2015385   | 6,0649914 | 0,02166098  |
| 6866 | ENSG00000175115 | 0,420250389  | 5,659630206 | 3,0692936 | 0,093043761 |
| 6867 | ENSG00000175137 | 0,118876184  | 4,153601142 | 0,4853444 | 0,531627845 |
| 6868 | ENSG00000175155 | 0,260038749  | 5,908217871 | 3,6209966 | 0,069540194 |
| 6869 | ENSG00000175161 | -0,724800565 | 4,591214068 | 4,5974771 | 0,042763787 |
| 6870 | ENSG00000175166 | -0,09868813  | 7,001394704 | 0,5412427 | 0,469293258 |
| 6871 | ENSG00000175183 | -0,57948109  | 3,932050697 | 5,2650238 | 0,031171013 |
| 6872 | ENSG00000175197 | -0,149518296 | 3,896290126 | 0,673755  | 0,449257487 |
| 6873 | ENSG00000175198 | -0,144752404 | 5,490461739 | 1,4423519 | 0,241880613 |
| 6874 | ENSG00000175203 | -0,064700246 | 6,231926744 | 0,2806743 | 0,601294718 |
| 6875 | ENSG00000175206 | 0,687269266  | 13,21677929 | 1,9126686 | 0,179883115 |
| 6876 | ENSG00000175215 | 0,192396899  | 6,654477613 | 0,9285678 | 0,345209819 |
| 6877 | ENSG00000175216 | -0,078414058 | 6,76700327  | 0,3534772 | 0,55790704  |
| 6878 | ENSG00000175220 | 0,63873985   | 6,4875845   | 6,5102508 | 0,017800575 |
| 6879 | ENSG00000175224 | 0,225422395  | 5,611009844 | 2,302992  | 0,142685246 |
| 6880 | ENSG00000175265 | 0,056325233  | 6,023483045 | 0,0684186 | 0,795970218 |
| 6881 | ENSG00000175274 | -0,029748382 | 5,317212998 | 0,0116727 | 0,914896149 |
| 6882 | ENSG00000175309 | -0,19303588  | 5,028060072 | 1,0467956 | 0,31683627  |
| 6883 | ENSG00000175322 | 0,035402839  | 3,677517311 | 0,0360196 | 0,86966666  |
| 6884 | ENSG00000175324 | -0,302474305 | 3,812739232 | 2,2736871 | 0,145134777 |
| 6885 | ENSG00000175334 | -0,243883817 | 5,292436451 | 1,7793217 | 0,195228693 |
| 6886 | ENSG00000175348 | -0,175115479 | 5,251476527 | 1,7115752 | 0,20359846  |
| 6887 | ENSG00000175354 | -0,159779354 | 4,724323628 | 0,8991071 | 0,352830868 |
| 6888 | ENSG00000175387 | -0,066081803 | 7,225065907 | 0,2981259 | 0,590273467 |
| 6889 | ENSG00000175390 | 0,218241899  | 6,452323066 | 3,632264  | 0,069137419 |
| 6890 | ENSG00000175395 | -0,354313639 | 5,495995588 | 3,3017298 | 0,082197068 |
| 6891 | ENSG00000175414 | 0,053998355  | 4,313419317 | 0,0659321 | 0,799626333 |
| 6892 | ENSG00000175416 | -0,241923129 | 6,08699566  | 1,2955084 | 0,266696484 |
| 6893 | ENSG00000175445 | 0,312251166  | 8,82974873  | 0,7194803 | 0,405013585 |
| 6894 | ENSG00000175455 | 0,086377679  | 5,447713185 | 0,3179707 | 0,578260777 |
| 6895 | ENSG00000175467 | 0,031027524  | 4,444995045 | 0,0245359 | 0,876889245 |
| 6896 | ENSG00000175470 | -0,088079231 | 4,880277611 | 0,6445852 | 0,430206066 |
| 6897 | ENSG00000175471 | -0,649993235 | 5,014412424 | 5,1778697 | 0,032462677 |
| 6898 | ENSG00000175548 | 0,069663779  | 4,656109264 | 0,1954801 | 0,662503673 |
| 6899 | ENSG00000175575 | -0,057829766 | 4,436788799 | 0,15341   | 0,698879302 |
| 6900 | ENSG00000175581 | -0,45018068  | 4,074428668 | 6,7133065 | 0,016299022 |
| 6901 | ENSG00000175582 | -0,001311005 | 6,754079944 | 0,0001491 | 0,990362682 |

|      |                 |              |             |           |             |
|------|-----------------|--------------|-------------|-----------|-------------|
| 6902 | ENSG00000175595 | -0,005664067 | 3,895692156 | 0,0016591 | 0,995508701 |
| 6903 | ENSG00000175606 | -0,5318896   | 4,422891549 | 7,1313212 | 0,013630161 |
| 6904 | ENSG00000175662 | 0,302822242  | 6,976400439 | 1,4197569 | 0,245535508 |
| 6905 | ENSG00000175701 | -0,478295489 | 4,101720062 | 3,9860348 | 0,057789144 |
| 6906 | ENSG00000175727 | 0,150983197  | 5,547559976 | 0,3564748 | 0,556274793 |
| 6907 | ENSG00000175756 | -0,353030777 | 5,324310319 | 2,1675877 | 0,154434436 |
| 6908 | ENSG00000175782 | 0,157409718  | 3,663488806 | 0,6836542 | 0,435451719 |
| 6909 | ENSG00000175792 | -0,337723627 | 4,630014777 | 6,0296706 | 0,021975224 |
| 6910 | ENSG00000175806 | -0,459707701 | 4,022457564 | 9,7707046 | 0,006589615 |
| 6911 | ENSG00000175826 | -0,177714745 | 4,488575631 | 0,8148315 | 0,376007365 |
| 6912 | ENSG00000175886 | 0,362087785  | 4,672596528 | 4,7115592 | 0,040478707 |
| 6913 | ENSG00000175893 | -0,310166374 | 6,226544203 | 1,9151861 | 0,179607912 |
| 6914 | ENSG00000175895 | -0,1661772   | 4,211199991 | 1,0777374 | 0,31020044  |
| 6915 | ENSG00000175899 | -0,274113794 | 9,98433847  | 2,5044656 | 0,127065713 |
| 6916 | ENSG00000175931 | 0,115330469  | 4,583772749 | 0,2745661 | 0,605274017 |
| 6917 | ENSG00000175946 | -0,200586083 | 4,278551365 | 0,266193  | 0,610797793 |
| 6918 | ENSG00000175970 | 0,207247773  | 4,460155396 | 1,7314989 | 0,201122483 |
| 6919 | ENSG00000175984 | 0,035992499  | 3,742092401 | 0,0480933 | 0,835414997 |
| 6920 | ENSG00000176014 | -0,506997773 | 6,690851128 | 9,8834076 | 0,004531477 |
| 6921 | ENSG00000176018 | -0,101479508 | 5,560918186 | 0,1703277 | 0,683624112 |
| 6922 | ENSG00000176046 | 0,059825422  | 5,173963988 | 0,0712613 | 0,79187653  |
| 6923 | ENSG00000176087 | -0,139503649 | 5,142783913 | 0,6532737 | 0,427185906 |
| 6924 | ENSG00000176095 | 0,230406074  | 4,455655519 | 1,5851661 | 0,220586032 |
| 6925 | ENSG00000176102 | 0,032254304  | 4,050063294 | 0,0795334 | 0,788881971 |
| 6926 | ENSG00000176105 | -0,112602292 | 5,557213389 | 0,536732  | 0,471155311 |
| 6927 | ENSG00000176124 | -0,220363318 | 3,52314764  | 1,7475988 | 0,263601611 |
| 6928 | ENSG00000176142 | -0,051073736 | 5,080411221 | 0,2348275 | 0,649091243 |
| 6929 | ENSG00000176148 | 0,067197311  | 3,748904055 | 0,1843994 | 0,748150973 |
| 6930 | ENSG00000176171 | -0,201021964 | 6,492646862 | 1,1257156 | 0,299652693 |
| 6931 | ENSG00000176209 | -0,111237316 | 4,810742388 | 0,4219073 | 0,522390314 |
| 6932 | ENSG00000176225 | -0,060921287 | 5,12615133  | 0,25881   | 0,615744218 |
| 6933 | ENSG00000176261 | -0,333182299 | 4,196566136 | 3,6312027 | 0,069219315 |
| 6934 | ENSG00000176340 | -0,540923158 | 6,698301771 | 6,1562745 | 0,020799369 |
| 6935 | ENSG00000176386 | -0,201278152 | 4,099610763 | 1,0319166 | 0,320225442 |
| 6936 | ENSG00000176390 | -0,061419729 | 3,982901847 | 0,1439677 | 0,707831775 |
| 6937 | ENSG00000176393 | -0,183966558 | 3,900113195 | 0,801548  | 0,37986051  |
| 6938 | ENSG00000176407 | -0,207836401 | 5,668230868 | 5,6794926 | 0,029024189 |
| 6939 | ENSG00000176422 | -0,129881675 | 3,88168831  | 0,99097   | 0,433936539 |
| 6940 | ENSG00000176435 | 0,217535737  | 4,956833348 | 3,2113934 | 0,086200297 |
| 6941 | ENSG00000176438 | 0,044522124  | 5,948279631 | 0,0146798 | 0,904611157 |
| 6942 | ENSG00000176444 | 0,038092048  | 4,212319608 | 0,0657875 | 0,860846654 |
| 6943 | ENSG00000176463 | -0,350362037 | 5,448343646 | 4,7106883 | 0,040495623 |
| 6944 | ENSG00000176485 | -0,258864348 | 6,116418692 | 1,2555291 | 0,274007372 |
| 6945 | ENSG00000176490 | -0,372427647 | 6,162655553 | 2,467115  | 0,129841406 |
| 6946 | ENSG00000176533 | 0,188447778  | 4,640999784 | 0,5950023 | 0,448306042 |
| 6947 | ENSG00000176542 | -0,021967083 | 5,754956403 | 0,0245485 | 0,876854409 |
| 6948 | ENSG00000176623 | -0,209458333 | 6,14069857  | 2,1033844 | 0,160382098 |
| 6949 | ENSG00000176624 | 0,159890433  | 4,820434732 | 1,1627573 | 0,292020074 |
| 6950 | ENSG00000176641 | 0,486175007  | 5,4093785   | 3,7989182 | 0,063523552 |
| 6951 | ENSG00000176658 | 0,867348667  | 5,365197566 | 12,935671 | 0,001513949 |
| 6952 | ENSG00000176681 | -0,365496179 | 4,954380893 | 2,3517609 | 0,138717096 |
| 6953 | ENSG00000176728 | 0,252062932  | 4,373060551 | 0,2938465 | 0,592954406 |
| 6954 | ENSG00000176731 | -0,414324976 | 3,939652121 | 4,5859408 | 0,043002835 |
| 6955 | ENSG00000176771 | 0,149222492  | 4,111154097 | 0,4287483 | 0,519067589 |
| 6956 | ENSG00000176783 | -0,058771093 | 4,813797006 | 0,173367  | 0,680968649 |
| 6957 | ENSG00000176809 | -0,420271769 | 4,295659127 | 3,0049916 | 0,096330748 |
| 6958 | ENSG00000176826 | 0,125381762  | 4,280011498 | 0,7348027 | 0,477954973 |
| 6959 | ENSG00000176834 | -0,124314476 | 3,99109588  | 0,4389347 | 0,514189961 |
| 6960 | ENSG00000176853 | -0,026436587 | 5,297346443 | 0,019156  | 0,891118856 |

|      |                 |              |             |           |             |
|------|-----------------|--------------|-------------|-----------|-------------|
| 6961 | ENSG00000176871 | -0,14088079  | 5,890209348 | 1,2305751 | 0,278665053 |
| 6962 | ENSG00000176903 | 0,23818757   | 4,601047461 | 2,4860704 | 0,128436437 |
| 6963 | ENSG00000176907 | -0,147144369 | 5,122718717 | 0,4366283 | 0,515287108 |
| 6964 | ENSG00000176915 | 0,121650295  | 5,410504775 | 0,5619186 | 0,461050643 |
| 6965 | ENSG00000176946 | -0,281343847 | 5,029416439 | 1,7541184 | 0,198307753 |
| 6966 | ENSG00000176953 | 0,106784062  | 4,259958426 | 0,4106927 | 0,572925818 |
| 6967 | ENSG00000176971 | 0,481547252  | 4,243495735 | 6,176164  | 0,020616732 |
| 6968 | ENSG00000176978 | -0,13566927  | 5,693405342 | 0,279183  | 0,602274369 |
| 6969 | ENSG00000176986 | 0,137780022  | 4,697130881 | 0,4193634 | 0,523635782 |
| 6970 | ENSG00000176994 | 0,137005652  | 4,604875268 | 0,3689601 | 0,549493468 |
| 6971 | ENSG00000177000 | -0,462995303 | 5,877506818 | 3,4498675 | 0,076044682 |
| 6972 | ENSG00000177034 | 0,032225405  | 5,277572794 | 0,0636013 | 0,803113258 |
| 6973 | ENSG00000177054 | -0,332368451 | 4,539819919 | 4,5774603 | 0,043179518 |
| 6974 | ENSG00000177058 | 0,080627165  | 4,077200237 | 0,3559032 | 0,583326316 |
| 6975 | ENSG00000177084 | 0,188551978  | 4,086358355 | 0,5636847 | 0,46035548  |
| 6976 | ENSG00000177098 | 0,24567501   | 4,11903939  | 1,1688911 | 0,290781389 |
| 6977 | ENSG00000177119 | 0,200558806  | 7,027583628 | 1,0012496 | 0,327369766 |
| 6978 | ENSG00000177125 | 0,246337944  | 4,195685099 | 3,0508239 | 0,101889923 |
| 6979 | ENSG00000177144 | -0,072567809 | 5,449538479 | 0,1402238 | 0,711472317 |
| 6980 | ENSG00000177150 | -0,348431365 | 5,394034822 | 3,3009347 | 0,082231601 |
| 6981 | ENSG00000177156 | -0,166248282 | 5,618104882 | 0,8289312 | 0,371979566 |
| 6982 | ENSG00000177181 | -0,514362989 | 4,313572235 | 3,0909148 | 0,091967847 |
| 6983 | ENSG00000177189 | 0,124485247  | 6,438643632 | 0,3182943 | 0,578068709 |
| 6984 | ENSG00000177200 | 0,002890651  | 7,572060914 | 0,0003464 | 0,985310429 |
| 6985 | ENSG00000177225 | 0,210858688  | 4,293221194 | 1,4371433 | 0,242749395 |
| 6986 | ENSG00000177239 | 0,38294038   | 4,886470495 | 4,7101475 | 0,040506131 |
| 6987 | ENSG00000177302 | 0,177288708  | 3,964724908 | 1,1670393 | 0,356641864 |
| 6988 | ENSG00000177311 | 0,023577913  | 6,905046576 | 0,0567101 | 0,813864692 |
| 6989 | ENSG00000177354 | 0,625555552  | 5,692873597 | 2,5602885 | 0,123160039 |
| 6990 | ENSG00000177370 | -0,150155505 | 4,179447641 | 1,0200185 | 0,322956845 |
| 6991 | ENSG00000177383 | -0,009714179 | 4,032852177 | 0,0076335 | 0,934767659 |
| 6992 | ENSG00000177409 | 0,278304563  | 5,163848694 | 1,2404226 | 0,276838304 |
| 6993 | ENSG00000177425 | 0,382839166  | 5,134901708 | 1,2189195 | 0,280934822 |
| 6994 | ENSG00000177426 | 0,432025126  | 3,921237695 | 3,0220772 | 0,095444418 |
| 6995 | ENSG00000177463 | -0,106056883 | 6,122441554 | 0,4836175 | 0,493721638 |
| 6996 | ENSG00000177469 | 0,34507254   | 7,957916413 | 2,6673425 | 0,115977082 |
| 6997 | ENSG00000177479 | 0,277070676  | 6,612517786 | 2,323951  | 0,140963545 |
| 6998 | ENSG00000177485 | 0,06297137   | 4,379364377 | 0,1459171 | 0,705957737 |
| 6999 | ENSG00000177556 | -0,024495152 | 4,032876735 | 0,0227714 | 0,881362461 |
| 7000 | ENSG00000177565 | 0,07909374   | 7,917262016 | 0,1614494 | 0,691516948 |
| 7001 | ENSG00000177570 | 0,265734256  | 5,182267509 | 2,4741853 | 0,12931963  |
| 7002 | ENSG00000177575 | -2,146995291 | 6,942339677 | 18,266086 | 0,000281952 |
| 7003 | ENSG00000177600 | 0,170162083  | 7,591811842 | 0,4375242 | 0,514860432 |
| 7004 | ENSG00000177606 | 0,351613336  | 5,985742274 | 2,689126  | 0,11457639  |
| 7005 | ENSG00000177613 | 0,016673273  | 5,25212975  | 0,0167532 | 0,89813003  |
| 7006 | ENSG00000177628 | 0,066426346  | 4,237857542 | 0,1329926 | 0,718664662 |
| 7007 | ENSG00000177646 | 0,018356215  | 4,808052716 | 0,0131016 | 0,909859912 |
| 7008 | ENSG00000177663 | -0,464941817 | 4,373843643 | 3,3799622 | 0,078879523 |
| 7009 | ENSG00000177666 | 0,044838237  | 5,998369775 | 0,0303672 | 0,863177139 |
| 7010 | ENSG00000177683 | -0,05781622  | 5,089359409 | 0,1351216 | 0,71652443  |
| 7011 | ENSG00000177694 | 0,447970259  | 4,353211966 | 4,1325547 | 0,053707658 |
| 7012 | ENSG00000177697 | -0,033909365 | 7,153692302 | 0,0283071 | 0,867852538 |
| 7013 | ENSG00000177700 | -0,20572577  | 5,602169463 | 0,9820058 | 0,331965764 |
| 7014 | ENSG00000177707 | 0,306157073  | 4,580947691 | 1,8077388 | 0,191827475 |
| 7015 | ENSG00000177728 | 0,275828205  | 4,675233849 | 1,3440013 | 0,258166754 |
| 7016 | ENSG00000177731 | -0,097404063 | 6,325637581 | 0,3036407 | 0,586896739 |
| 7017 | ENSG00000177733 | 0,115164786  | 5,864284704 | 1,0487246 | 0,316363842 |
| 7018 | ENSG00000177830 | 0,148590292  | 4,7116613   | 0,6332674 | 0,434256714 |
| 7019 | ENSG00000177853 | -0,089652129 | 6,162353133 | 0,2490857 | 0,622436794 |



|      |                 |              |             |           |             |
|------|-----------------|--------------|-------------|-----------|-------------|
| 7020 | ENSG00000177879 | -0,178255471 | 5,436720327 | 1,0237927 | 0,322096951 |
| 7021 | ENSG00000177885 | 0,167507175  | 6,096724607 | 1,5550114 | 0,224843104 |
| 7022 | ENSG00000177888 | -0,021454167 | 5,884638819 | 0,006206  | 0,937887281 |
| 7023 | ENSG00000177889 | -0,321957049 | 5,932470521 | 3,0268995 | 0,095195972 |
| 7024 | ENSG00000177932 | 0,029709682  | 4,115883096 | 0,0369655 | 0,849214506 |
| 7025 | ENSG00000177951 | 0,266061336  | 4,3249284   | 1,9310485 | 0,177885668 |
| 7026 | ENSG00000177954 | 0,367033512  | 8,634004113 | 3,2299136 | 0,085384563 |
| 7027 | ENSG00000177963 | 0,228579693  | 5,244357619 | 2,5266661 | 0,125497793 |
| 7028 | ENSG00000177971 | -0,12313426  | 3,824400566 | 0,738593  | 0,517976268 |
| 7029 | ENSG00000177981 | -0,373235848 | 5,438204355 | 8,2797595 | 0,00846131  |
| 7030 | ENSG00000177990 | -0,040919313 | 7,119315499 | 0,0116284 | 0,915057282 |
| 7031 | ENSG00000178028 | -0,093994999 | 4,246247827 | 0,3018448 | 0,587997805 |
| 7032 | ENSG00000178033 | 0,229129297  | 4,333792049 | 1,3737886 | 0,253102317 |
| 7033 | ENSG00000178035 | 0,209377025  | 5,699576156 | 1,3064769 | 0,264735408 |
| 7034 | ENSG00000178038 | 0,075106248  | 4,480943173 | 0,0818096 | 0,777407829 |
| 7035 | ENSG00000178053 | -0,839403853 | 7,136973307 | 6,8824559 | 0,01515502  |
| 7036 | ENSG00000178057 | -0,075977382 | 5,180858477 | 0,1975799 | 0,660815803 |
| 7037 | ENSG00000178074 | -0,139922508 | 4,182357466 | 1,0361494 | 0,416326489 |
| 7038 | ENSG00000178104 | -0,138679499 | 10,65208127 | 0,2580801 | 0,616256468 |
| 7039 | ENSG00000178105 | -0,119450382 | 4,582770838 | 0,9012434 | 0,372715261 |
| 7040 | ENSG00000178115 | 0,065476554  | 3,581223385 | 0,1045073 | 0,778623332 |
| 7041 | ENSG00000178163 | -0,20623355  | 5,870987765 | 2,2411402 | 0,147872869 |
| 7042 | ENSG00000178177 | -0,132024331 | 4,669478728 | 0,4550495 | 0,50663872  |
| 7043 | ENSG00000178188 | 0,25230765   | 4,590782845 | 1,7463827 | 0,199264851 |
| 7044 | ENSG00000178202 | 0,145727252  | 5,309969127 | 0,7226262 | 0,404004031 |
| 7045 | ENSG00000178209 | 0,315695682  | 6,848181786 | 1,6962306 | 0,205610828 |
| 7046 | ENSG00000178229 | 0,145619953  | 3,458184454 | 0,7616245 | 0,501507191 |
| 7047 | ENSG00000178234 | 0,054428716  | 5,281205204 | 0,3238074 | 0,574798115 |
| 7048 | ENSG00000178252 | 0,232118819  | 5,686615811 | 1,5559344 | 0,224753061 |
| 7049 | ENSG00000178295 | -0,304802862 | 4,025974043 | 4,0471024 | 0,059647354 |
| 7050 | ENSG00000178338 | -0,062924278 | 3,719687742 | 0,2412343 | 0,746987687 |
| 7051 | ENSG00000178385 | 0,211729851  | 4,97817223  | 2,0088571 | 0,169723342 |
| 7052 | ENSG00000178425 | -0,193831796 | 5,472243737 | 1,4511861 | 0,240528585 |
| 7053 | ENSG00000178429 | 0,309888248  | 5,799980603 | 1,4314131 | 0,243663148 |
| 7054 | ENSG00000178449 | -0,547606944 | 5,362562221 | 11,383679 | 0,002605986 |
| 7055 | ENSG00000178458 | -0,046901894 | 4,131343497 | 0,1147629 | 0,77783774  |
| 7056 | ENSG00000178464 | 0,386249134  | 6,192427059 | 3,2092799 | 0,086326551 |
| 7057 | ENSG00000178467 | 0,315706659  | 4,282073209 | 4,5983034 | 0,059483656 |
| 7058 | ENSG00000178498 | 0,057358375  | 4,580739186 | 0,1284331 | 0,723314768 |
| 7059 | ENSG00000178502 | 0,404506517  | 3,610690648 | 3,698824  | 0,066855485 |
| 7060 | ENSG00000178537 | 0,307727478  | 5,142125519 | 2,3004045 | 0,14289954  |
| 7061 | ENSG00000178538 | -0,269662534 | 4,075849304 | 0,8470563 | 0,366893219 |
| 7062 | ENSG00000178567 | -0,009547769 | 6,164041506 | 0,0036043 | 0,952643281 |
| 7063 | ENSG00000178568 | -0,051686308 | 6,197701303 | 0,030491  | 0,862901351 |
| 7064 | ENSG00000178573 | 0,59935843   | 5,189241642 | 4,7302711 | 0,040117178 |
| 7065 | ENSG00000178585 | -0,101576683 | 4,240619103 | 0,2716955 | 0,607155448 |
| 7066 | ENSG00000178607 | 0,586824906  | 4,019508424 | 5,3982116 | 0,029306664 |
| 7067 | ENSG00000178662 | -0,276063865 | 4,887819448 | 1,1782011 | 0,288914636 |
| 7068 | ENSG00000178691 | 0,019723814  | 5,286702456 | 0,0228009 | 0,881281622 |
| 7069 | ENSG00000178694 | -0,077036945 | 4,141042547 | 0,4391846 | 0,667877013 |
| 7070 | ENSG00000178695 | -0,020774572 | 6,933900725 | 0,0106547 | 0,91867749  |
| 7071 | ENSG00000178719 | -0,075385234 | 5,385976582 | 0,1189003 | 0,733348377 |
| 7072 | ENSG00000178726 | -0,361735009 | 5,140361985 | 2,4169505 | 0,133615854 |
| 7073 | ENSG00000178741 | -0,592416672 | 7,636113141 | 7,5731701 | 0,011323633 |
| 7074 | ENSG00000178761 | -0,091505157 | 4,495989837 | 0,291331  | 0,59453142  |
| 7075 | ENSG00000178764 | 0,052141812  | 4,453316952 | 0,072764  | 0,789747896 |
| 7076 | ENSG00000178802 | -0,323271672 | 5,024214964 | 3,6697945 | 0,067858793 |
| 7077 | ENSG00000178852 | 0,14002272   | 4,53260492  | 0,5697575 | 0,457978179 |
| 7078 | ENSG00000178878 | 0,051950871  | 5,545580857 | 0,0163403 | 0,899389723 |

|      |                 |              |             |           |             |
|------|-----------------|--------------|-------------|-----------|-------------|
| 7079 | ENSG00000178904 | 0,316600749  | 4,67338415  | 1,7438748 | 0,199576359 |
| 7080 | ENSG00000178913 | -0,067238167 | 6,802056792 | 0,2525071 | 0,62005307  |
| 7081 | ENSG00000178927 | -0,281951868 | 4,711757916 | 1,8055808 | 0,192083195 |
| 7082 | ENSG00000178950 | 0,169617251  | 4,567633937 | 0,7714625 | 0,388804749 |
| 7083 | ENSG00000178952 | -0,197497802 | 6,523006557 | 1,1806035 | 0,288435517 |
| 7084 | ENSG00000178971 | 0,066859196  | 4,036068261 | 0,087077  | 0,770561079 |
| 7085 | ENSG00000178974 | -0,112182016 | 4,859536273 | 1,0144783 | 0,348529772 |
| 7086 | ENSG00000178980 | -0,586692597 | 8,112028794 | 8,6857658 | 0,007208502 |
| 7087 | ENSG00000178982 | -0,320571667 | 7,289135188 | 3,60208   | 0,070266662 |
| 7088 | ENSG00000178988 | -0,040064658 | 5,587894548 | 0,0962301 | 0,759171672 |
| 7089 | ENSG00000178996 | 0,383732437  | 4,73268688  | 4,0698671 | 0,055412502 |
| 7090 | ENSG00000179010 | -0,075881721 | 7,240749055 | 0,4798352 | 0,495374819 |
| 7091 | ENSG00000179021 | -0,028068868 | 4,436647792 | 0,0296088 | 0,864878633 |
| 7092 | ENSG00000179051 | 0,278400302  | 4,066370868 | 1,5605269 | 0,224091861 |
| 7093 | ENSG00000179091 | -0,434217645 | 7,129590696 | 2,6938431 | 0,114275699 |
| 7094 | ENSG00000179094 | 0,738476079  | 5,775695248 | 3,6518441 | 0,068487784 |
| 7095 | ENSG00000179104 | 0,440757683  | 3,876608839 | 2,4598933 | 0,130376921 |
| 7096 | ENSG00000179119 | 0,199340488  | 4,488623499 | 2,0174387 | 0,168809368 |
| 7097 | ENSG00000179134 | 0,229388449  | 4,849567851 | 0,9413092 | 0,341985672 |
| 7098 | ENSG00000179144 | -0,437425483 | 4,235057731 | 5,3257231 | 0,030305393 |
| 7099 | ENSG00000179152 | -0,113459515 | 5,393596947 | 0,4861292 | 0,49261332  |
| 7100 | ENSG00000179163 | 0,321206251  | 4,617745696 | 2,7318824 | 0,111884361 |
| 7101 | ENSG00000179195 | -0,152233427 | 6,659718181 | 2,1632958 | 0,154778747 |
| 7102 | ENSG00000179218 | -0,06748103  | 7,721507673 | 0,1356536 | 0,715992575 |
| 7103 | ENSG00000179222 | 0,298037471  | 6,211259493 | 4,2386983 | 0,050929831 |
| 7104 | ENSG00000179262 | -0,158223242 | 5,172907357 | 0,9028787 | 0,351841994 |
| 7105 | ENSG00000179295 | 0,15870479   | 7,481763704 | 1,0348041 | 0,319536862 |
| 7106 | ENSG00000179304 | 0,257500848  | 4,730342435 | 2,7831748 | 0,108751956 |
| 7107 | ENSG00000179335 | 0,086567787  | 4,946242914 | 0,2564292 | 0,617380589 |
| 7108 | ENSG00000179364 | 0,126613206  | 5,050686364 | 0,436665  | 0,515269636 |
| 7109 | ENSG00000179387 | -0,029456973 | 5,447408141 | 0,015342  | 0,90249483  |
| 7110 | ENSG00000179406 | 0,279561918  | 3,529029815 | 2,3465294 | 0,173716404 |
| 7111 | ENSG00000179409 | 0,183935841  | 3,796711034 | 0,865382  | 0,368685572 |
| 7112 | ENSG00000179454 | -0,151980083 | 5,104001829 | 0,5944032 | 0,448531746 |
| 7113 | ENSG00000179456 | -0,080687041 | 4,762281626 | 0,2957045 | 0,591795234 |
| 7114 | ENSG00000179476 | -0,043355111 | 3,534228916 | 0,0602454 | 0,848345156 |
| 7115 | ENSG00000179532 | -0,10650451  | 4,365402007 | 0,1827518 | 0,672975513 |
| 7116 | ENSG00000179562 | 0,316952503  | 3,770504121 | 5,7481842 | 0,095427058 |
| 7117 | ENSG00000179583 | 0,405172831  | 4,237494142 | 1,613256  | 0,216672954 |
| 7118 | ENSG00000179604 | -0,524569842 | 5,119373575 | 4,3036306 | 0,049349401 |
| 7119 | ENSG00000179630 | -0,05284458  | 3,99491048  | 0,0524399 | 0,820884943 |
| 7120 | ENSG00000179632 | -0,179732    | 5,97580494  | 1,1298098 | 0,298795984 |
| 7121 | ENSG00000179776 | 0,124682758  | 5,837597607 | 0,3840693 | 0,541495413 |
| 7122 | ENSG00000179813 | -0,730508758 | 4,686525902 | 4,0614435 | 0,055646231 |
| 7123 | ENSG00000179818 | -0,019534893 | 4,765421381 | 0,007312  | 0,932592333 |
| 7124 | ENSG00000179820 | 0,082218393  | 5,627466883 | 0,1127728 | 0,74003853  |
| 7125 | ENSG00000179833 | 0,235700054  | 4,825796566 | 3,3855185 | 0,078604639 |
| 7126 | ENSG00000179889 | 0,070890208  | 6,504980402 | 0,3510091 | 0,559274731 |
| 7127 | ENSG00000179909 | 0,093145891  | 4,261475979 | 0,2600748 | 0,61490437  |
| 7128 | ENSG00000179912 | 0,153971797  | 4,888635093 | 0,6127414 | 0,441704506 |
| 7129 | ENSG00000179914 | 3,049926016  | 9,619595443 | 7,8712151 | 0,010012532 |
| 7130 | ENSG00000179915 | -0,658905287 | 4,544244338 | 5,0763818 | 0,034042866 |
| 7131 | ENSG00000179918 | -0,342899201 | 4,663509722 | 5,9964614 | 0,02230399  |
| 7132 | ENSG00000179933 | -0,282862532 | 4,694899326 | 4,3452626 | 0,048310099 |
| 7133 | ENSG00000179941 | 0,006226651  | 4,570637829 | 0,0007136 | 0,978917199 |
| 7134 | ENSG00000179950 | -0,058865622 | 5,382278401 | 0,1101993 | 0,742908971 |
| 7135 | ENSG00000179978 | 0,184143347  | 5,138001347 | 1,0190198 | 0,323203505 |
| 7136 | ENSG00000179981 | -0,195511356 | 4,395005066 | 1,3180793 | 0,262681424 |
| 7137 | ENSG00000180008 | 0,011349533  | 5,723232682 | 0,0032055 | 0,955336494 |

|      |                 |              |             |           |             |
|------|-----------------|--------------|-------------|-----------|-------------|
| 7138 | ENSG00000180011 | -0,458279034 | 5,944376396 | 6,6196178 | 0,016973627 |
| 7139 | ENSG00000180098 | -0,134510807 | 3,725893538 | 1,5017089 | 0,478554636 |
| 7140 | ENSG00000180104 | 0,002614716  | 5,109144337 | 0,0003293 | 0,985676606 |
| 7141 | ENSG00000180155 | -0,074992843 | 5,809359969 | 0,0927363 | 0,763452039 |
| 7142 | ENSG00000180182 | 0,102583514  | 5,339729573 | 0,8680385 | 0,361096262 |
| 7143 | ENSG00000180185 | -0,418071293 | 4,242482939 | 6,9086743 | 0,014985795 |
| 7144 | ENSG00000180228 | -0,148481891 | 4,412876648 | 1,2819878 | 0,309817193 |
| 7145 | ENSG00000180229 | -0,532414526 | 6,058121487 | 3,5034531 | 0,073950636 |
| 7146 | ENSG00000180263 | 0,117116217  | 5,389504209 | 0,4754814 | 0,497341491 |
| 7147 | ENSG00000180304 | 0,209068627  | 5,748572044 | 1,7017901 | 0,204895109 |
| 7148 | ENSG00000180329 | -0,36730795  | 4,511221677 | 2,8364436 | 0,105606746 |
| 7149 | ENSG00000180353 | -0,313477748 | 4,613295075 | 1,3012196 | 0,265673003 |
| 7150 | ENSG00000180354 | 0,973414927  | 6,33688828  | 21,545777 | 0,000112419 |
| 7151 | ENSG00000180357 | 0,09498447   | 5,376963921 | 0,2632444 | 0,612769337 |
| 7152 | ENSG00000180370 | -0,037566064 | 6,347851689 | 0,0576656 | 0,812341356 |
| 7153 | ENSG00000180376 | -0,032325132 | 5,164383721 | 0,0461466 | 0,831793728 |
| 7154 | ENSG00000180398 | 0,175312898  | 6,440232115 | 1,3188177 | 0,26255141  |
| 7155 | ENSG00000180447 | 1,029535428  | 4,892448946 | 6,9696485 | 0,014600274 |
| 7156 | ENSG00000180488 | 0,065614597  | 5,253768964 | 0,2069836 | 0,65338063  |
| 7157 | ENSG00000180530 | -0,036421448 | 6,36298419  | 0,027645  | 0,869392084 |
| 7158 | ENSG00000180543 | -0,130496432 | 5,161249817 | 0,5898821 | 0,450240945 |
| 7159 | ENSG00000180573 | 0,434809358  | 4,733027872 | 3,1040237 | 0,091322535 |
| 7160 | ENSG00000180581 | -0,315498673 | 4,704983035 | 2,1570859 | 0,155393251 |
| 7161 | ENSG00000180626 | 0,056711219  | 4,357335527 | 0,213539  | 0,74795932  |
| 7162 | ENSG00000180628 | 0,071797998  | 7,225020625 | 0,1599731 | 0,692853789 |
| 7163 | ENSG00000180667 | 0,309127262  | 4,718466375 | 0,9686239 | 0,335214748 |
| 7164 | ENSG00000180694 | 0,132470456  | 4,783521051 | 0,5523776 | 0,464835993 |
| 7165 | ENSG00000180747 | -0,219452665 | 7,520428246 | 0,9837927 | 0,331535242 |
| 7166 | ENSG00000180758 | -0,103696772 | 3,837692872 | 0,2154951 | 0,64683686  |
| 7167 | ENSG00000180773 | -0,468025157 | 4,476864139 | 9,6285504 | 0,004993115 |
| 7168 | ENSG00000180776 | -0,009617271 | 5,372195129 | 0,0026671 | 0,959256123 |
| 7169 | ENSG00000180787 | -0,075687609 | 4,557188118 | 0,2352835 | 0,632199316 |
| 7170 | ENSG00000180817 | -0,557598316 | 6,286949512 | 6,2959609 | 0,019553671 |
| 7171 | ENSG00000180867 | 0,047338678  | 4,950711332 | 0,1103862 | 0,742693093 |
| 7172 | ENSG00000180879 | 0,325937765  | 5,72378163  | 2,3727876 | 0,137046831 |
| 7173 | ENSG00000180881 | -0,304659006 | 4,345632446 | 2,767088  | 0,109723207 |
| 7174 | ENSG00000180891 | -0,125951297 | 4,755498917 | 0,5943246 | 0,448561369 |
| 7175 | ENSG00000180901 | 0,06282852   | 5,243521039 | 0,1130382 | 0,739744654 |
| 7176 | ENSG00000180917 | -0,058242913 | 4,646990147 | 0,1348961 | 0,716750219 |
| 7177 | ENSG00000180957 | 0,069832295  | 6,041525121 | 0,2429235 | 0,626739404 |
| 7178 | ENSG00000180964 | -0,294715173 | 5,83809617  | 1,2152285 | 0,281646025 |
| 7179 | ENSG00000180979 | 0,14998189   | 3,758584    | 1,7662015 | 0,433536931 |
| 7180 | ENSG00000180992 | -0,448954632 | 4,186831765 | 5,3110406 | 0,030512285 |
| 7181 | ENSG00000181019 | 0,045501723  | 4,206176471 | 0,0149637 | 0,903697996 |
| 7182 | ENSG00000181061 | -0,814609682 | 6,790985537 | 4,5764319 | 0,043201001 |
| 7183 | ENSG00000181072 | -0,337279121 | 7,489378091 | 1,2187047 | 0,280976143 |
| 7184 | ENSG00000181090 | 0,016110295  | 4,668218558 | 0,0080688 | 0,929198817 |
| 7185 | ENSG00000181092 | 0,607410917  | 6,64860387  | 0,5720198 | 0,457097695 |
| 7186 | ENSG00000181104 | 1,169836739  | 4,613987286 | 23,638429 | 6,48957E-05 |
| 7187 | ENSG00000181163 | 0,090618399  | 8,072533806 | 0,1344535 | 0,71719399  |
| 7188 | ENSG00000181191 | 0,358171398  | 4,484841421 | 2,6580373 | 0,116581528 |
| 7189 | ENSG00000181192 | 0,224539421  | 4,993086017 | 1,2736249 | 0,270666137 |
| 7190 | ENSG00000181222 | 0,423868556  | 5,892211491 | 2,588926  | 0,12118851  |
| 7191 | ENSG00000181264 | -0,039035502 | 4,840382704 | 0,0370642 | 0,84901604  |
| 7192 | ENSG00000181315 | 0,028363645  | 5,073611078 | 0,0281156 | 0,868295846 |
| 7193 | ENSG00000181381 | -0,120046665 | 5,364220576 | 0,5017803 | 0,485802324 |
| 7194 | ENSG00000181450 | 0,014553262  | 4,439310841 | 0,0063773 | 0,937037862 |
| 7195 | ENSG00000181458 | 0,197462446  | 3,775931233 | 0,61491   | 0,440908125 |
| 7196 | ENSG00000181467 | 0,28559321   | 4,594228452 | 1,355835  | 0,256139229 |

|      |                 |              |             |           |             |
|------|-----------------|--------------|-------------|-----------|-------------|
| 7197 | ENSG00000181524 | 0,025904957  | 4,676212767 | 0,0215087 | 0,884673417 |
| 7198 | ENSG00000181555 | 0,128235766  | 6,681763921 | 1,6374313 | 0,213330836 |
| 7199 | ENSG00000181610 | -0,359243678 | 5,548980445 | 4,6257357 | 0,042184532 |
| 7200 | ENSG00000181619 | 0,088321542  | 3,401975352 | 0,3195327 | 0,695043765 |
| 7201 | ENSG00000181666 | -0,029569528 | 5,489756629 | 0,0299941 | 0,864011308 |
| 7202 | ENSG00000181690 | -0,343629686 | 4,624188671 | 1,2230271 | 0,28014613  |
| 7203 | ENSG00000181704 | -0,120252799 | 5,74967381  | 0,6479422 | 0,429052504 |
| 7204 | ENSG00000181722 | 0,086061243  | 7,865736865 | 0,3821958 | 0,542454182 |
| 7205 | ENSG00000181744 | 0,223817743  | 4,813132689 | 1,1444466 | 0,295760072 |
| 7206 | ENSG00000181754 | 0,006838091  | 4,269420049 | 0,002095  | 0,963885174 |
| 7207 | ENSG00000181788 | 0,009850645  | 4,15735344  | 0,0035221 | 0,953185924 |
| 7208 | ENSG00000181789 | 0,298825408  | 6,506375875 | 5,7714654 | 0,024681061 |
| 7209 | ENSG00000181804 | -0,072800447 | 4,558254436 | 0,1275738 | 0,724201564 |
| 7210 | ENSG00000181826 | 0,075232902  | 5,038023981 | 0,1060209 | 0,74765008  |
| 7211 | ENSG00000181827 | 0,302882714  | 4,4509859   | 4,8289576 | 0,038232321 |
| 7212 | ENSG00000181852 | 0,065430546  | 5,36447117  | 0,272766  | 0,60643515  |
| 7213 | ENSG00000181856 | -0,578122472 | 6,244254937 | 3,8115251 | 0,063117471 |
| 7214 | ENSG00000181873 | 0,207560652  | 3,752799183 | 0,7868127 | 0,384202907 |
| 7215 | ENSG00000181894 | -0,026365711 | 3,917478436 | 0,0620344 | 0,895834766 |
| 7216 | ENSG00000181904 | -0,035991972 | 5,473079138 | 0,0584237 | 0,811136526 |
| 7217 | ENSG00000181915 | 0,22690001   | 4,717046689 | 2,6311493 | 0,118311791 |
| 7218 | ENSG00000181924 | -0,279088599 | 4,822826646 | 3,5324237 | 0,072830152 |
| 7219 | ENSG00000181929 | -0,215879271 | 5,899983106 | 1,9987136 | 0,170761213 |
| 7220 | ENSG00000181982 | -0,114759677 | 4,39070093  | 0,6649361 | 0,42312048  |
| 7221 | ENSG00000181991 | -0,327220954 | 3,939046808 | 7,7951434 | 0,060892743 |
| 7222 | ENSG00000182004 | -0,296077661 | 4,655824081 | 1,3379915 | 0,259204417 |
| 7223 | ENSG00000182013 | 0,775522655  | 4,406493817 | 10,676216 | 0,003370332 |
| 7224 | ENSG00000182022 | 0,185403984  | 4,054342382 | 0,3925949 | 0,537078628 |
| 7225 | ENSG00000182054 | -0,868770073 | 7,325035659 | 11,731567 | 0,002301639 |
| 7226 | ENSG00000182093 | -0,31586054  | 4,236376827 | 2,397228  | 0,135135328 |
| 7227 | ENSG00000182095 | 0,457916732  | 4,538040154 | 3,0952952 | 0,09175163  |
| 7228 | ENSG00000182117 | -0,480778614 | 4,92298812  | 5,7299848 | 0,025180956 |
| 7229 | ENSG00000182141 | -0,178962591 | 4,461117374 | 1,7417291 | 0,19979871  |
| 7230 | ENSG00000182149 | -0,039170229 | 6,495230297 | 0,2084383 | 0,652240908 |
| 7231 | ENSG00000182150 | -0,032102403 | 5,864341497 | 0,0929581 | 0,763168843 |
| 7232 | ENSG00000182154 | -0,256204058 | 5,781653731 | 1,4435578 | 0,241731734 |
| 7233 | ENSG00000182158 | 0,025024458  | 6,17732014  | 0,0168288 | 0,897905776 |
| 7234 | ENSG00000182168 | 0,292280859  | 4,384770094 | 1,0033129 | 0,326882221 |
| 7235 | ENSG00000182179 | 0,775699214  | 4,337123568 | 11,898011 | 0,002169981 |
| 7236 | ENSG00000182180 | -0,293920436 | 5,610370161 | 6,0366154 | 0,021907154 |
| 7237 | ENSG00000182197 | 0,53376298   | 5,499686792 | 13,369845 | 0,001304595 |
| 7238 | ENSG00000182199 | -0,077408618 | 4,316634301 | 0,1608392 | 0,692068637 |
| 7239 | ENSG00000182220 | 0,171938644  | 5,96192817  | 1,1654813 | 0,291469115 |
| 7240 | ENSG00000182240 | 0,23369921   | 4,979844544 | 1,4335571 | 0,243320748 |
| 7241 | ENSG00000182247 | 0,131841856  | 4,160602415 | 1,5201429 | 0,402488969 |
| 7242 | ENSG00000182253 | -0,564734716 | 8,201266742 | 5,4006925 | 0,02927314  |
| 7243 | ENSG00000182263 | 0,033813735  | 4,960782807 | 0,0789999 | 0,781149442 |
| 7244 | ENSG00000182287 | -0,513648388 | 6,508984117 | 4,2221238 | 0,051373843 |
| 7245 | ENSG00000182307 | 0,145784643  | 4,680935892 | 1,5422373 | 0,297178254 |
| 7246 | ENSG00000182326 | 0,110034384  | 8,168953989 | 0,1646937 | 0,688603934 |
| 7247 | ENSG00000182359 | -0,175879561 | 3,693985656 | 0,5390845 | 0,470196046 |
| 7248 | ENSG00000182372 | 0,03217739   | 4,145098952 | 0,0322227 | 0,859104093 |
| 7249 | ENSG00000182446 | 0,034242475  | 6,117697691 | 0,0450047 | 0,833855042 |
| 7250 | ENSG00000182463 | -0,247578808 | 4,728759105 | 1,4517371 | 0,24044198  |
| 7251 | ENSG00000182473 | 0,052669559  | 5,379653652 | 0,0999077 | 0,754777142 |
| 7252 | ENSG00000182481 | -0,549358657 | 4,468712382 | 10,024235 | 0,004296648 |
| 7253 | ENSG00000182492 | 1,022873618  | 6,876048714 | 8,6499156 | 0,007311833 |
| 7254 | ENSG00000182504 | -0,021024021 | 4,4802118   | 0,0248461 | 0,972663373 |
| 7255 | ENSG00000182512 | -0,428720596 | 5,229499467 | 5,7535373 | 0,024913684 |

|      |                 |              |             |           |             |
|------|-----------------|--------------|-------------|-----------|-------------|
| 7256 | ENSG00000182534 | 0,149606587  | 8,307863086 | 1,0551761 | 0,314912173 |
| 7257 | ENSG00000182541 | -0,29484414  | 4,331707674 | 1,9511069 | 0,175736604 |
| 7258 | ENSG00000182551 | -0,004461732 | 7,003051213 | 0,0009228 | 0,976025812 |
| 7259 | ENSG00000182552 | -0,180795614 | 4,618336792 | 1,0151722 | 0,324099347 |
| 7260 | ENSG00000182568 | 0,103790193  | 5,812856223 | 0,4567935 | 0,505833295 |
| 7261 | ENSG00000182578 | 0,569191744  | 5,006662967 | 3,2846494 | 0,082942566 |
| 7262 | ENSG00000182606 | -0,087743571 | 7,371573002 | 0,1425529 | 0,709201025 |
| 7263 | ENSG00000182621 | -0,292488413 | 6,107421576 | 2,2221106 | 0,149569123 |
| 7264 | ENSG00000182628 | 0,151333702  | 4,777396997 | 0,8484102 | 0,36651734  |
| 7265 | ENSG00000182636 | 0,195714879  | 4,886996146 | 1,8687021 | 0,184745477 |
| 7266 | ENSG00000182670 | 0,291335632  | 7,864479855 | 5,9543677 | 0,022728601 |
| 7267 | ENSG00000182700 | 0,416040541  | 4,957035644 | 11,100851 | 0,00287654  |
| 7268 | ENSG00000182704 | 0,159559532  | 4,192839735 | 0,1225975 | 0,72940488  |
| 7269 | ENSG00000182718 | 0,160947868  | 8,056082887 | 0,3281586 | 0,572276774 |
| 7270 | ENSG00000182732 | -0,859725237 | 4,269580411 | 14,125833 | 0,001016374 |
| 7271 | ENSG00000182752 | 0,090202036  | 4,224054669 | 0,0783307 | 0,782062043 |
| 7272 | ENSG00000182768 | 0,176051144  | 4,870163204 | 2,3508505 | 0,163238545 |
| 7273 | ENSG00000182809 | -0,211292039 | 8,266600911 | 0,5783179 | 0,454660875 |
| 7274 | ENSG00000182827 | 0,166172298  | 5,539966964 | 1,3997926 | 0,248754772 |
| 7275 | ENSG00000182831 | 0,084572369  | 6,128864964 | 0,4187749 | 0,523902553 |
| 7276 | ENSG00000182836 | -0,350125251 | 7,463301105 | 2,2252985 | 0,149290381 |
| 7277 | ENSG00000182871 | 0,395690296  | 5,378275547 | 4,8891607 | 0,037189366 |
| 7278 | ENSG00000182872 | 0,110423728  | 4,467477292 | 0,371888  | 0,547926068 |
| 7279 | ENSG00000182899 | 0,257620045  | 8,008137463 | 1,4982757 | 0,233268245 |
| 7280 | ENSG00000182903 | -0,079795681 | 5,314548734 | 0,4409224 | 0,513224951 |
| 7281 | ENSG00000182919 | -0,007973577 | 4,224771417 | 0,0042785 | 0,971883685 |
| 7282 | ENSG00000182923 | -0,284610212 | 5,34320653  | 6,3235027 | 0,019289958 |
| 7283 | ENSG00000182934 | 0,04679464   | 6,1093715   | 0,127194  | 0,724583437 |
| 7284 | ENSG00000182944 | -0,031870916 | 6,978474808 | 0,066118  | 0,799342499 |
| 7285 | ENSG00000182952 | -0,084351102 | 5,374451376 | 0,4305703 | 0,518166583 |
| 7286 | ENSG00000182957 | -0,190692888 | 4,274163229 | 1,6141476 | 0,216550181 |
| 7287 | ENSG00000182963 | -0,117175042 | 5,50819502  | 0,2946954 | 0,592424163 |
| 7288 | ENSG00000182973 | -0,113813594 | 4,282184531 | 1,2087532 | 0,492740856 |
| 7289 | ENSG00000182983 | 0,056235746  | 3,951806773 | 0,119953  | 0,77401073  |
| 7290 | ENSG00000182985 | -0,122798598 | 5,201622841 | 0,324147  | 0,574618077 |
| 7291 | ENSG00000183011 | -0,315568896 | 4,291049748 | 2,0235551 | 0,168233005 |
| 7292 | ENSG00000183020 | -0,184649038 | 5,00510779  | 0,9547921 | 0,338619779 |
| 7293 | ENSG00000183023 | -0,097841902 | 9,883895206 | 0,0657503 | 0,799896503 |
| 7294 | ENSG00000183044 | 0,854979107  | 4,227593203 | 8,1639764 | 0,008885931 |
| 7295 | ENSG00000183049 | -0,192639044 | 5,181676879 | 0,6408943 | 0,431539678 |
| 7296 | ENSG00000183054 | -0,056592469 | 7,586715929 | 0,1696493 | 0,6842054   |
| 7297 | ENSG00000183060 | -0,231294392 | 3,972337644 | 1,9407185 | 0,176845645 |
| 7298 | ENSG00000183087 | 0,049704902  | 6,570282756 | 0,0885976 | 0,768626739 |
| 7299 | ENSG00000183091 | 0,673946658  | 8,798908319 | 1,3784472 | 0,252321897 |
| 7300 | ENSG00000183098 | -0,489872377 | 4,005241938 | 2,4150468 | 0,133761635 |
| 7301 | ENSG00000183111 | 0,091971919  | 4,709035907 | 0,3091319 | 0,583556291 |
| 7302 | ENSG00000183137 | -0,134839395 | 4,077311013 | 0,7023755 | 0,431968321 |
| 7303 | ENSG00000183172 | -0,200827626 | 4,748269647 | 1,4109851 | 0,246956727 |
| 7304 | ENSG00000183199 | 0,188567044  | 4,513047996 | 1,7582902 | 0,197754137 |
| 7305 | ENSG00000183207 | -0,083440981 | 4,491078604 | 0,174639  | 0,67987846  |
| 7306 | ENSG00000183230 | -0,094864473 | 7,118375939 | 0,0742379 | 0,787682841 |
| 7307 | ENSG00000183255 | -0,082006716 | 7,373123924 | 0,701783  | 0,410734946 |
| 7308 | ENSG00000183258 | 0,003481491  | 4,261321619 | 0,0007723 | 0,982252914 |
| 7309 | ENSG00000183283 | 0,086847599  | 6,941275357 | 0,7751042 | 0,387674286 |
| 7310 | ENSG00000183291 | 0,131625632  | 6,048162714 | 0,4335114 | 0,516776527 |
| 7311 | ENSG00000183298 | 0,148634742  | 4,604366837 | 0,3471399 | 0,561451893 |
| 7312 | ENSG00000183309 | 0,229399284  | 4,615953347 | 3,4412094 | 0,093560107 |
| 7313 | ENSG00000183337 | 0,218111198  | 4,569549895 | 1,2216262 | 0,280414784 |
| 7314 | ENSG00000183340 | 0,212131589  | 3,783121556 | 2,5923731 | 0,218151415 |

|      |                 |              |             |           |             |
|------|-----------------|--------------|-------------|-----------|-------------|
| 7315 | ENSG00000183354 | -0,215958618 | 6,083328205 | 4,3727205 | 0,047663793 |
| 7316 | ENSG00000183426 | -0,158116627 | 5,138713332 | 0,3927026 | 0,537023308 |
| 7317 | ENSG00000183431 | -0,040275346 | 5,405186662 | 0,0907802 | 0,765872349 |
| 7318 | ENSG00000183454 | 1,219586643  | 5,307445292 | 8,0962926 | 0,009133384 |
| 7319 | ENSG00000183474 | -0,028121943 | 5,145459794 | 0,0292644 | 0,865658688 |
| 7320 | ENSG00000183475 | 0,150876046  | 3,73031439  | 2,0921843 | 0,41201121  |
| 7321 | ENSG00000183486 | 0,079656759  | 4,03952086  | 0,1469583 | 0,704962615 |
| 7322 | ENSG00000183495 | 0,07843482   | 4,976516816 | 0,133332  | 0,718322231 |
| 7323 | ENSG00000183506 | -0,014364521 | 4,306294007 | 0,0049019 | 0,944785387 |
| 7324 | ENSG00000183508 | 0,403825873  | 5,536023119 | 2,8263838 | 0,106192502 |
| 7325 | ENSG00000183513 | 0,024443275  | 4,773827799 | 0,0286806 | 0,866990036 |
| 7326 | ENSG00000183520 | -0,630981382 | 4,744741328 | 11,16426  | 0,002820473 |
| 7327 | ENSG00000183527 | -0,172868167 | 3,847897745 | 1,5205947 | 0,375303831 |
| 7328 | ENSG00000183530 | 0,132866695  | 5,767165202 | 1,4096772 | 0,247127879 |
| 7329 | ENSG00000183576 | -0,039873844 | 6,769926938 | 0,0982352 | 0,756759063 |
| 7330 | ENSG00000183580 | -0,131003254 | 4,513126298 | 0,5328924 | 0,472727905 |
| 7331 | ENSG00000183597 | 0,211965795  | 4,516996349 | 0,9793753 | 0,332600944 |
| 7332 | ENSG00000183604 | -0,19070751  | 6,385159601 | 0,7999326 | 0,380333052 |
| 7333 | ENSG00000183605 | -0,34131881  | 4,621587128 | 5,8731647 | 0,023576478 |
| 7334 | ENSG00000183621 | -0,376341287 | 4,474987841 | 8,5529119 | 0,007582531 |
| 7335 | ENSG00000183624 | -0,382968452 | 5,455322694 | 5,5821671 | 0,026933181 |
| 7336 | ENSG00000183648 | -0,695652055 | 6,776128782 | 9,4521741 | 0,005342773 |
| 7337 | ENSG00000183666 | 0,163785327  | 4,363241399 | 1,1878961 | 0,315487117 |
| 7338 | ENSG00000183688 | -0,136087096 | 4,350541933 | 0,7303486 | 0,401541907 |
| 7339 | ENSG00000183696 | 0,020981982  | 4,627546489 | 0,0103602 | 0,919805056 |
| 7340 | ENSG00000183718 | -0,016475023 | 3,617024241 | 0,0100007 | 0,921203966 |
| 7341 | ENSG00000183722 | -0,094524025 | 6,146969258 | 0,4522    | 0,507940566 |
| 7342 | ENSG00000183723 | 0,441822876  | 4,407058113 | 3,4991973 | 0,074114509 |
| 7343 | ENSG00000183726 | 0,174667474  | 5,84076171  | 1,752875  | 0,19841647  |
| 7344 | ENSG00000183735 | -0,222731058 | 4,999174428 | 1,5954078 | 0,219149107 |
| 7345 | ENSG00000183741 | 0,203051997  | 5,316615769 | 0,8681491 | 0,36109955  |
| 7346 | ENSG00000183762 | 0,080031391  | 5,397540459 | 0,0923026 | 0,763988196 |
| 7347 | ENSG00000183793 | 0,051572568  | 4,216530446 | 0,0599756 | 0,808695819 |
| 7348 | ENSG00000183801 | 0,567559133  | 4,063822019 | 4,4206992 | 0,046597457 |
| 7349 | ENSG00000183808 | 0,021587911  | 5,140998995 | 0,0239321 | 0,878398009 |
| 7350 | ENSG00000183814 | 0,396607386  | 3,720364171 | 2,9039169 | 0,101773848 |
| 7351 | ENSG00000183826 | -0,135758518 | 5,179034234 | 0,7077163 | 0,408822761 |
| 7352 | ENSG00000183853 | 0,374957571  | 4,904900421 | 1,7846598 | 0,194584142 |
| 7353 | ENSG00000183864 | 0,3215881    | 5,444911852 | 2,7624964 | 0,110002279 |
| 7354 | ENSG00000183873 | -0,400054238 | 7,228132888 | 1,6560635 | 0,210875505 |
| 7355 | ENSG00000183878 | 0,131958404  | 5,562685299 | 0,0876097 | 0,769881323 |
| 7356 | ENSG00000183889 | 0,037417243  | 5,06629893  | 0,0337316 | 0,855880625 |
| 7357 | ENSG00000183955 | 0,045823861  | 4,153298455 | 0,1226145 | 0,79636958  |
| 7358 | ENSG00000183963 | -0,268947695 | 6,265413044 | 1,2879853 | 0,268052528 |
| 7359 | ENSG00000183978 | -0,274568089 | 4,527729316 | 3,4615626 | 0,07554869  |
| 7360 | ENSG00000184007 | -0,253646732 | 7,763513836 | 2,9466262 | 0,099384744 |
| 7361 | ENSG00000184009 | 0,217113683  | 8,587368218 | 0,6266723 | 0,436627918 |
| 7362 | ENSG00000184014 | 0,078835452  | 6,777191837 | 0,2778347 | 0,603141799 |
| 7363 | ENSG00000184076 | -0,608213657 | 5,818231683 | 5,6059303 | 0,026642543 |
| 7364 | ENSG00000184083 | 0,171643865  | 4,155254601 | 1,4880685 | 0,299179261 |
| 7365 | ENSG00000184110 | 0,203462225  | 7,617761786 | 1,0782608 | 0,30982881  |
| 7366 | ENSG00000184117 | 0,265274508  | 4,068456562 | 2,3302039 | 0,140454693 |
| 7367 | ENSG00000184178 | -0,026064727 | 3,885011179 | 0,0607743 | 0,867134656 |
| 7368 | ENSG00000184182 | -0,53397377  | 3,922067134 | 16,168392 | 0,002688822 |
| 7369 | ENSG00000184203 | -0,142855521 | 5,936677124 | 0,6045642 | 0,444728191 |
| 7370 | ENSG00000184205 | 0,26170628   | 5,54284862  | 1,9271941 | 0,178302298 |
| 7371 | ENSG00000184206 | 0,000191688  | 4,163871348 | 9,375E-08 | 0,999758328 |
| 7372 | ENSG00000184208 | 0,339483334  | 3,823665358 | 2,8344153 | 0,105724548 |
| 7373 | ENSG00000184216 | -0,141197499 | 4,650778472 | 0,5092216 | 0,482620138 |

|      |                 |              |             |           |             |
|------|-----------------|--------------|-------------|-----------|-------------|
| 7374 | ENSG00000184220 | -0,378052751 | 4,317925867 | 7,8230878 | 0,013608383 |
| 7375 | ENSG00000184226 | 0,431911763  | 8,091259961 | 3,7277881 | 0,065871272 |
| 7376 | ENSG00000184227 | -0,200136104 | 4,779044208 | 1,3198812 | 0,262364292 |
| 7377 | ENSG00000184232 | 0,092848771  | 4,493839024 | 0,1342743 | 0,717373927 |
| 7378 | ENSG00000184260 | 0,141077974  | 4,458637688 | 0,3184828 | 0,577956948 |
| 7379 | ENSG00000184277 | -0,134166842 | 5,055457242 | 1,7700867 | 0,287677441 |
| 7380 | ENSG00000184304 | 0,667956559  | 3,923921806 | 4,003972  | 0,057271054 |
| 7381 | ENSG00000184305 | -0,212320129 | 5,097585726 | 0,541365  | 0,469269261 |
| 7382 | ENSG00000184319 | 0,044411802  | 4,203899715 | 0,0709195 | 0,792364059 |
| 7383 | ENSG00000184347 | 0,980804699  | 6,329015565 | 7,3621559 | 0,012366348 |
| 7384 | ENSG00000184349 | 0,304639348  | 4,609323596 | 3,2359009 | 0,085113448 |
| 7385 | ENSG00000184371 | 0,148340633  | 4,305822155 | 0,2711975 | 0,607483174 |
| 7386 | ENSG00000184384 | 0,313737171  | 4,751462196 | 1,986779  | 0,171992235 |
| 7387 | ENSG00000184402 | -0,029902802 | 3,828801634 | 0,0423144 | 0,848378095 |
| 7388 | ENSG00000184432 | 0,003002006  | 6,947749144 | 0,000574  | 0,981090938 |
| 7389 | ENSG00000184445 | -0,085497162 | 4,066317103 | 0,297446  | 0,645662659 |
| 7390 | ENSG00000184465 | 0,186245345  | 3,895039319 | 1,3182427 | 0,30739072  |
| 7391 | ENSG00000184481 | 0,114869187  | 4,227234305 | 0,5617216 | 0,565368691 |
| 7392 | ENSG00000184489 | -0,611044401 | 7,138069212 | 3,3411578 | 0,080505438 |
| 7393 | ENSG00000184500 | 1,009318972  | 6,876281778 | 45,072299 | 7,28961E-07 |
| 7394 | ENSG00000184517 | 0,11063368   | 3,718423909 | 0,3769655 | 0,545228124 |
| 7395 | ENSG00000184544 | -0,379353084 | 5,934314749 | 1,4302356 | 0,243851454 |
| 7396 | ENSG00000184557 | -0,570270998 | 6,174127826 | 2,1401871 | 0,156951188 |
| 7397 | ENSG00000184575 | 0,015631438  | 5,77991842  | 0,009388  | 0,923647573 |
| 7398 | ENSG00000184584 | -0,069647806 | 5,758662917 | 0,1331182 | 0,718537839 |
| 7399 | ENSG00000184588 | 0,101087094  | 6,06235114  | 0,1225457 | 0,729459707 |
| 7400 | ENSG00000184601 | 0,14164965   | 4,938196774 | 0,3005715 | 0,588781069 |
| 7401 | ENSG00000184602 | -0,341607251 | 4,954532413 | 3,6899129 | 0,067161653 |
| 7402 | ENSG00000184634 | 0,356554706  | 4,878385352 | 2,4865777 | 0,128411072 |
| 7403 | ENSG00000184640 | -0,275215896 | 5,450641731 | 1,5764537 | 0,221817743 |
| 7404 | ENSG00000184677 | 0,050380784  | 5,103895674 | 0,0667341 | 0,798439124 |
| 7405 | ENSG00000184678 | 0,01074675   | 5,213940948 | 0,0033836 | 0,9541142   |
| 7406 | ENSG00000184708 | -0,075774746 | 4,333643061 | 0,2582225 | 0,616154297 |
| 7407 | ENSG00000184719 | -0,072549102 | 3,786817433 | 0,2445138 | 0,699353628 |
| 7408 | ENSG00000184743 | 0,321767733  | 6,677529725 | 1,1477008 | 0,295090727 |
| 7409 | ENSG00000184752 | -0,959703963 | 6,842148977 | 13,673386 | 0,001180559 |
| 7410 | ENSG00000184787 | -0,137816631 | 6,156888376 | 1,550868  | 0,225442246 |
| 7411 | ENSG00000184831 | -0,664678096 | 4,454371049 | 13,065518 | 0,001448488 |
| 7412 | ENSG00000184840 | -0,038552713 | 5,624912288 | 0,0526386 | 0,820552108 |
| 7413 | ENSG00000184863 | 0,011500385  | 5,759591242 | 0,0083004 | 0,928190053 |
| 7414 | ENSG00000184867 | 0,40379548   | 5,099883746 | 10,477386 | 0,003616229 |
| 7415 | ENSG00000184887 | -0,166362497 | 4,700577723 | 0,6829992 | 0,417006124 |
| 7416 | ENSG00000184900 | -0,03785925  | 5,636838564 | 0,1458593 | 0,706000952 |
| 7417 | ENSG00000184903 | 0,073786792  | 3,675049098 | 0,5418373 | 0,694002922 |
| 7418 | ENSG00000184939 | 0,236704843  | 4,689884179 | 3,593007  | 0,070552393 |
| 7419 | ENSG00000184983 | -0,652832517 | 6,921789356 | 8,7272285 | 0,007090993 |
| 7420 | ENSG00000185009 | 0,123306496  | 5,065991461 | 1,6019677 | 0,235481008 |
| 7421 | ENSG00000185010 | -0,755650566 | 7,290182761 | 7,1333072 | 0,013618697 |
| 7422 | ENSG00000185015 | 0,148224391  | 3,780817154 | 0,7129987 | 0,409538894 |
| 7423 | ENSG00000185043 | 0,040031559  | 4,904592812 | 0,0591682 | 0,809961308 |
| 7424 | ENSG00000185070 | 1,549725338  | 6,054999094 | 7,2187679 | 0,01313532  |
| 7425 | ENSG00000185088 | -0,033316389 | 6,009627516 | 0,0279821 | 0,86860577  |
| 7426 | ENSG00000185100 | -0,422726731 | 5,702354663 | 4,5650221 | 0,043440142 |
| 7427 | ENSG00000185104 | -0,122020697 | 5,921363174 | 1,2970437 | 0,266380534 |
| 7428 | ENSG00000185115 | -0,035503817 | 3,861306705 | 0,1208017 | 0,813122927 |
| 7429 | ENSG00000185122 | -0,013240271 | 5,410667872 | 0,0053808 | 0,942155497 |
| 7430 | ENSG00000185127 | -0,055919962 | 4,182780669 | 0,1210659 | 0,808966823 |
| 7431 | ENSG00000185129 | 0,204095854  | 6,786532955 | 2,1876511 | 0,152575583 |
| 7432 | ENSG00000185164 | 0,135826442  | 8,579906961 | 0,4256003 | 0,520591838 |

|      |                 |              |             |           |             |
|------|-----------------|--------------|-------------|-----------|-------------|
| 7433 | ENSG00000185201 | -0,270690246 | 6,257600837 | 0,8957745 | 0,353707922 |
| 7434 | ENSG00000185215 | -0,134602552 | 5,37787829  | 0,4126751 | 0,526936211 |
| 7435 | ENSG00000185219 | 0,09594725   | 5,332193147 | 0,2297352 | 0,636224253 |
| 7436 | ENSG00000185222 | -0,038474972 | 5,269525828 | 0,03394   | 0,85544133  |
| 7437 | ENSG00000185238 | -0,024468826 | 4,421767414 | 0,024596  | 0,895816395 |
| 7438 | ENSG00000185246 | -0,173811823 | 4,932975937 | 1,1561252 | 0,293367341 |
| 7439 | ENSG00000185261 | 0,182051915  | 3,747216549 | 1,0732143 | 0,310938363 |
| 7440 | ENSG00000185278 | 0,16935403   | 6,23728552  | 1,1073084 | 0,303545468 |
| 7441 | ENSG00000185304 | 0,473750931  | 5,703476433 | 1,5746619 | 0,222072131 |
| 7442 | ENSG00000185305 | 0,019632028  | 4,643186354 | 0,012627  | 0,911500398 |
| 7443 | ENSG00000185339 | -0,603377239 | 4,015221108 | 4,5044834 | 0,044734202 |
| 7444 | ENSG00000185344 | -0,136173113 | 4,54139023  | 1,1590759 | 0,292728509 |
| 7445 | ENSG00000185345 | -0,055396979 | 4,800325185 | 0,0812305 | 0,778175046 |
| 7446 | ENSG00000185359 | 0,233111371  | 4,279000107 | 1,7381201 | 0,200293464 |
| 7447 | ENSG00000185414 | -0,175229102 | 4,952056694 | 1,3345297 | 0,259804581 |
| 7448 | ENSG00000185418 | -0,017699235 | 5,370318262 | 0,0099487 | 0,92140827  |
| 7449 | ENSG00000185432 | 0,328189802  | 6,230220529 | 0,7038684 | 0,410080529 |
| 7450 | ENSG00000185477 | 0,172998961  | 5,638383303 | 0,8747825 | 0,359304666 |
| 7451 | ENSG00000185483 | 0,863367913  | 4,453946784 | 23,695196 | 6,39592E-05 |
| 7452 | ENSG00000185485 | -0,157281919 | 5,223976171 | 0,6574393 | 0,425736301 |
| 7453 | ENSG00000185495 | -0,076393449 | 3,873239243 | 0,173451  | 0,680905037 |
| 7454 | ENSG00000185515 | 0,006430242  | 4,147448543 | 0,0021952 | 0,963032124 |
| 7455 | ENSG00000185532 | -0,292023495 | 6,472617503 | 3,4484074 | 0,076102685 |
| 7456 | ENSG00000185551 | 0,168375501  | 5,207997632 | 0,7746219 | 0,387850958 |
| 7457 | ENSG00000185567 | 0,149839572  | 4,489604164 | 0,1769219 | 0,677917162 |
| 7458 | ENSG00000185585 | 0,042569765  | 4,719723066 | 0,029893  | 0,86423842  |
| 7459 | ENSG00000185591 | 0,165280776  | 6,269847685 | 0,9255175 | 0,345988012 |
| 7460 | ENSG00000185596 | -0,039908921 | 4,582290404 | 0,0497011 | 0,825542636 |
| 7461 | ENSG00000185608 | -0,274776574 | 4,821898598 | 1,7792041 | 0,19524292  |
| 7462 | ENSG00000185619 | -0,087312732 | 4,785128362 | 0,5088772 | 0,482741895 |
| 7463 | ENSG00000185624 | 0,211376907  | 7,113000145 | 1,6991286 | 0,205237361 |
| 7464 | ENSG00000185627 | -0,27391608  | 5,807669513 | 5,2340102 | 0,031589306 |
| 7465 | ENSG00000185630 | 0,241429776  | 6,95162467  | 1,5149445 | 0,230765167 |
| 7466 | ENSG00000185641 | 0,007358269  | 5,200139931 | 0,0008426 | 0,977092109 |
| 7467 | ENSG00000185650 | 0,346973227  | 6,283508028 | 1,9475674 | 0,176113518 |
| 7468 | ENSG00000185651 | -0,363763104 | 5,816817101 | 8,8915451 | 0,006629734 |
| 7469 | ENSG00000185658 | -0,029992173 | 7,639866246 | 0,0317096 | 0,860217531 |
| 7470 | ENSG00000185684 | 0,114793186  | 3,738937082 | 0,234507  | 0,632759083 |
| 7471 | ENSG00000185710 | -0,230625433 | 6,984446977 | 1,0336802 | 0,319821119 |
| 7472 | ENSG00000185716 | 0,012554866  | 4,309830354 | 0,0112857 | 0,916310033 |
| 7473 | ENSG00000185721 | -0,306902653 | 5,406048919 | 3,3897831 | 0,078474026 |
| 7474 | ENSG00000185722 | 0,196067425  | 5,330252702 | 1,5479544 | 0,225907837 |
| 7475 | ENSG00000185728 | -0,032225429 | 6,577503958 | 0,0554239 | 0,815946807 |
| 7476 | ENSG00000185739 | -0,443444315 | 8,839590745 | 2,0729664 | 0,163337689 |
| 7477 | ENSG00000185745 | -0,016485222 | 5,130391398 | 0,0043527 | 0,947965144 |
| 7478 | ENSG00000185787 | -0,12907217  | 7,882638018 | 0,7997592 | 0,380351918 |
| 7479 | ENSG00000185808 | -0,244632415 | 4,382505981 | 2,6977725 | 0,128940452 |
| 7480 | ENSG00000185825 | -0,130188653 | 5,942534479 | 0,4655352 | 0,50182977  |
| 7481 | ENSG00000185829 | -0,505207241 | 4,675614112 | 3,0795846 | 0,092529854 |
| 7482 | ENSG00000185834 | 0,223551936  | 3,981978635 | 0,9132675 | 0,349138362 |
| 7483 | ENSG00000185842 | -0,136655879 | 3,745780367 | 0,4195384 | 0,523549921 |
| 7484 | ENSG00000185864 | -0,045014899 | 6,303111597 | 0,0244358 | 0,877138557 |
| 7485 | ENSG00000185880 | -0,512870746 | 6,171649545 | 11,600717 | 0,002408165 |
| 7486 | ENSG00000185885 | -0,191027457 | 4,993590879 | 1,4716498 | 0,237338586 |
| 7487 | ENSG00000185896 | -0,013289549 | 6,349204068 | 0,0087874 | 0,92612028  |
| 7488 | ENSG00000185909 | 0,047890073  | 4,731321116 | 0,0775307 | 0,783147991 |
| 7489 | ENSG00000185917 | 0,033043938  | 3,775287633 | 0,0658435 | 0,884496343 |
| 7490 | ENSG00000185946 | -0,188244846 | 5,07755325  | 1,4906286 | 0,234428108 |
| 7491 | ENSG00000185947 | 0,028997673  | 4,261168605 | 0,0191383 | 0,891168829 |



|      |                 |              |             |           |             |
|------|-----------------|--------------|-------------|-----------|-------------|
| 7492 | ENSG00000185950 | -0,141673114 | 5,143124376 | 0,3768041 | 0,545313476 |
| 7493 | ENSG00000185963 | 0,016238755  | 5,372047806 | 0,0261951 | 0,945425312 |
| 7494 | ENSG00000185973 | -0,286830176 | 5,45938878  | 3,5058949 | 0,073856798 |
| 7495 | ENSG00000185986 | -0,174118845 | 4,621138763 | 1,0782245 | 0,309836774 |
| 7496 | ENSG00000185989 | 0,13640148   | 4,418059473 | 0,3567911 | 0,556101041 |
| 7497 | ENSG00000186001 | 0,145742056  | 5,689880953 | 1,4600385 | 0,239099734 |
| 7498 | ENSG00000186017 | 0,005458587  | 4,158666678 | 0,0015204 | 0,96923096  |
| 7499 | ENSG00000186020 | 0,030826583  | 4,802470354 | 0,0428796 | 0,837765677 |
| 7500 | ENSG00000186063 | 0,027746039  | 6,185842534 | 0,0371682 | 0,848802662 |
| 7501 | ENSG00000186073 | 0,047867907  | 4,480583786 | 0,0480616 | 0,828395748 |
| 7502 | ENSG00000186076 | 0,092550057  | 5,663768426 | 0,3068967 | 0,584911303 |
| 7503 | ENSG00000186088 | 0,035995567  | 4,722016554 | 0,0774522 | 0,783246247 |
| 7504 | ENSG00000186104 | -0,310475865 | 3,858031699 | 6,1726189 | 0,082060129 |
| 7505 | ENSG00000186106 | -0,304461736 | 4,899433563 | 1,5728204 | 0,22233396  |
| 7506 | ENSG00000186130 | -0,126179176 | 4,252913972 | 0,2922587 | 0,593948786 |
| 7507 | ENSG00000186141 | 0,193683986  | 4,232526047 | 3,5613351 | 0,228115601 |
| 7508 | ENSG00000186166 | -0,093258945 | 4,461366595 | 0,2700594 | 0,608233501 |
| 7509 | ENSG00000186184 | 0,027875846  | 5,09854912  | 0,0830076 | 0,823623867 |
| 7510 | ENSG00000186260 | -0,075762475 | 6,218544502 | 0,2371403 | 0,630865584 |
| 7511 | ENSG00000186272 | -0,050201778 | 3,660559423 | 0,2147575 | 0,795800681 |
| 7512 | ENSG00000186283 | 0,197689703  | 3,815486661 | 1,4838752 | 0,322569488 |
| 7513 | ENSG00000186298 | -0,872701131 | 7,373106006 | 46,200186 | 5,95737E-07 |
| 7514 | ENSG00000186300 | -0,084091304 | 3,984952531 | 0,5166252 | 0,631185488 |
| 7515 | ENSG00000186310 | 0,6847218    | 3,938141046 | 6,2788011 | 0,019702138 |
| 7516 | ENSG00000186314 | -0,484748425 | 4,622194435 | 5,2672606 | 0,031138627 |
| 7517 | ENSG00000186318 | 0,467836293  | 4,180354337 | 7,2224436 | 0,01311496  |
| 7518 | ENSG00000186340 | 0,670006499  | 4,823301869 | 2,9076626 | 0,101565859 |
| 7519 | ENSG00000186350 | 0,128619062  | 5,126767584 | 0,3073282 | 0,584649177 |
| 7520 | ENSG00000186376 | 0,081389773  | 4,256035507 | 0,40946   | 0,619487047 |
| 7521 | ENSG00000186399 | 0,097746363  | 3,459870548 | 0,1930802 | 0,664446187 |
| 7522 | ENSG00000186432 | 0,098831506  | 7,382243694 | 0,4267683 | 0,520006908 |
| 7523 | ENSG00000186439 | -0,561229597 | 8,462312641 | 3,2537038 | 0,084313142 |
| 7524 | ENSG00000186448 | 0,113734312  | 4,988352594 | 1,6435073 | 0,278653273 |
| 7525 | ENSG00000186462 | 0,059022019  | 3,836425382 | 0,0579046 | 0,811960581 |
| 7526 | ENSG00000186468 | 0,152875707  | 7,530425951 | 0,363799  | 0,552277274 |
| 7527 | ENSG00000186469 | 0,290789806  | 4,345537164 | 1,5329605 | 0,228097954 |
| 7528 | ENSG00000186470 | 0,713625383  | 4,859708197 | 6,9867128 | 0,014494357 |
| 7529 | ENSG00000186472 | 0,2096199    | 4,334023334 | 1,1113109 | 0,302693245 |
| 7530 | ENSG00000186480 | -0,142170278 | 5,169744291 | 0,3243698 | 0,574487537 |
| 7531 | ENSG00000186522 | 0,16475322   | 5,886415461 | 1,1443235 | 0,295785444 |
| 7532 | ENSG00000186532 | -0,139749926 | 3,940964242 | 0,9511749 | 0,393169282 |
| 7533 | ENSG00000186566 | 0,08910605   | 5,689058328 | 0,2346214 | 0,632676519 |
| 7534 | ENSG00000186575 | -0,048924888 | 4,998918764 | 0,0639178 | 0,802642476 |
| 7535 | ENSG00000186591 | 0,343167372  | 6,914921993 | 6,267053  | 0,019776166 |
| 7536 | ENSG00000186594 | -0,256355784 | 5,878110027 | 1,8406363 | 0,187980685 |
| 7537 | ENSG00000186625 | -0,082330686 | 4,071373559 | 0,8790778 | 0,639897528 |
| 7538 | ENSG00000186628 | -0,154185168 | 5,871146711 | 0,2212426 | 0,642503051 |
| 7539 | ENSG00000186635 | 0,250741169  | 5,177748452 | 1,671211  | 0,208870605 |
| 7540 | ENSG00000186642 | 0,26811879   | 4,772442872 | 1,1860524 | 0,287352747 |
| 7541 | ENSG00000186660 | -0,143590619 | 6,036601531 | 1,8914079 | 0,182182348 |
| 7542 | ENSG00000186687 | -0,293429099 | 5,608984952 | 2,9603965 | 0,098689516 |
| 7543 | ENSG00000186716 | 0,27882931   | 4,682472488 | 0,9880521 | 0,330512132 |
| 7544 | ENSG00000186812 | 0,117519023  | 5,210616961 | 1,1502018 | 0,294539429 |
| 7545 | ENSG00000186814 | 0,196542384  | 5,220804299 | 1,0787034 | 0,309731748 |
| 7546 | ENSG00000186815 | 0,179136263  | 6,277822284 | 0,4420337 | 0,512722324 |
| 7547 | ENSG00000186834 | -0,043481634 | 4,643024983 | 0,0759197 | 0,785353442 |
| 7548 | ENSG00000186868 | 0,31051382   | 3,901672911 | 0,6064599 | 0,444024295 |
| 7549 | ENSG00000186908 | -0,233439822 | 6,042049742 | 1,4325553 | 0,243480665 |
| 7550 | ENSG00000186918 | 0,493742392  | 4,82555988  | 5,0376319 | 0,034668793 |

|      |                 |              |             |           |             |
|------|-----------------|--------------|-------------|-----------|-------------|
| 7551 | ENSG00000186951 | 0,031008895  | 6,373582481 | 0,0195506 | 0,890010771 |
| 7552 | ENSG00000187051 | -0,261293375 | 4,675234126 | 1,6673785 | 0,209375609 |
| 7553 | ENSG00000187079 | -0,272304686 | 7,225135584 | 3,7346526 | 0,065596877 |
| 7554 | ENSG00000187097 | 0,077371877  | 3,937359879 | 0,3629999 | 0,670991975 |
| 7555 | ENSG00000187098 | -0,105548746 | 6,358077537 | 0,2163001 | 0,646225687 |
| 7556 | ENSG00000187109 | -0,017358486 | 8,48399218  | 0,0102068 | 0,920396025 |
| 7557 | ENSG00000187118 | -0,384643895 | 4,208215783 | 8,3924586 | 0,015841341 |
| 7558 | ENSG00000187134 | 0,095956576  | 6,232866765 | 0,0592977 | 0,809757706 |
| 7559 | ENSG00000187147 | -0,145135424 | 4,646743898 | 1,0121706 | 0,324773082 |
| 7560 | ENSG00000187164 | 0,438088893  | 4,386659932 | 3,773623  | 0,064347347 |
| 7561 | ENSG00000187187 | 0,025661547  | 4,403936335 | 0,0374364 | 0,848263663 |
| 7562 | ENSG00000187189 | -0,146219707 | 5,21552898  | 0,6530703 | 0,427256887 |
| 7563 | ENSG00000187229 | -0,308095997 | 3,599746527 | 0,6573566 | 0,425765006 |
| 7564 | ENSG00000187231 | -0,154559169 | 6,170648179 | 1,2706354 | 0,271174457 |
| 7565 | ENSG00000187239 | 0,298431288  | 5,060859361 | 2,3193381 | 0,141340339 |
| 7566 | ENSG00000187240 | 0,350285264  | 6,064515013 | 2,2065538 | 0,150938339 |
| 7567 | ENSG00000187257 | 0,047612746  | 4,751225222 | 0,1395055 | 0,712165331 |
| 7568 | ENSG00000187325 | -0,297844861 | 5,337581365 | 1,2802625 | 0,269453955 |
| 7569 | ENSG00000187391 | -0,007984987 | 5,151051746 | 0,0040338 | 0,949902593 |
| 7570 | ENSG00000187446 | 0,158487116  | 6,554043599 | 1,3730337 | 0,253187832 |
| 7571 | ENSG00000187474 | 0,478505736  | 3,867571189 | 2,4817591 | 0,128763453 |
| 7572 | ENSG00000187498 | -0,131956998 | 8,128067305 | 0,3276663 | 0,572563079 |
| 7573 | ENSG00000187514 | 0,332745788  | 7,539840862 | 1,5378067 | 0,227387162 |
| 7574 | ENSG00000187522 | -0,18041836  | 3,770020582 | 1,3721499 | 0,349665226 |
| 7575 | ENSG00000187555 | 0,00764906   | 6,416986584 | 0,0041453 | 0,949216264 |
| 7576 | ENSG00000187601 | -0,131511203 | 4,28334515  | 0,6690391 | 0,440182976 |
| 7577 | ENSG00000187627 | 0,424297158  | 5,638275339 | 1,3806239 | 0,251958327 |
| 7578 | ENSG00000187642 | -0,441504282 | 4,785098929 | 2,2582291 | 0,1464471   |
| 7579 | ENSG00000187653 | 0,6420163    | 6,208612766 | 4,4112005 | 0,046814166 |
| 7580 | ENSG00000187672 | -0,368385531 | 3,490336773 | 2,0688842 | 0,163735532 |
| 7581 | ENSG00000187676 | -0,255535572 | 5,453164394 | 1,3176632 | 0,262754733 |
| 7582 | ENSG00000187678 | 0,871959632  | 4,637149358 | 8,2171805 | 0,008696602 |
| 7583 | ENSG00000187699 | -0,523781336 | 5,100640032 | 10,364725 | 0,003782211 |
| 7584 | ENSG00000187713 | -0,14804131  | 4,303936253 | 1,2910305 | 0,302545162 |
| 7585 | ENSG00000187720 | 0,045338347  | 6,423618277 | 0,0170697 | 0,897181841 |
| 7586 | ENSG00000187735 | 0,048902715  | 6,125592446 | 0,1278601 | 0,723894534 |
| 7587 | ENSG00000187742 | -0,058313627 | 5,677582788 | 0,1498998 | 0,702173196 |
| 7588 | ENSG00000187764 | 0,26807105   | 4,547117909 | 2,0796197 | 0,162691761 |
| 7589 | ENSG00000187778 | 0,081907948  | 5,323469251 | 0,2796475 | 0,601974308 |
| 7590 | ENSG00000187790 | -0,120543884 | 4,174621435 | 0,5685597 | 0,458445503 |
| 7591 | ENSG00000187837 | -0,167361872 | 5,946695145 | 0,26083   | 0,614394183 |
| 7592 | ENSG00000187866 | -0,160114714 | 4,01315405  | 1,2271814 | 0,340703407 |
| 7593 | ENSG00000187955 | 0,90310544   | 7,308565127 | 7,282552  | 0,012786913 |
| 7594 | ENSG00000188021 | 0,120889613  | 5,133565626 | 0,553784  | 0,464274818 |
| 7595 | ENSG00000188026 | -0,188756566 | 5,292891028 | 0,9877095 | 0,330594254 |
| 7596 | ENSG00000188070 | 0,280686628  | 4,07154907  | 2,6232635 | 0,118873331 |
| 7597 | ENSG00000188092 | -0,277659872 | 4,780545739 | 5,2622496 | 0,033739871 |
| 7598 | ENSG00000188153 | 0,010097608  | 5,88878833  | 0,0025468 | 0,960184923 |
| 7599 | ENSG00000188171 | 0,188106708  | 3,682500139 | 1,8130191 | 0,310732998 |
| 7600 | ENSG00000188177 | -0,039504104 | 5,996212648 | 0,0628554 | 0,804253866 |
| 7601 | ENSG00000188186 | 0,029743503  | 4,728281904 | 0,0233065 | 0,879987761 |
| 7602 | ENSG00000188215 | 0,291780501  | 4,671319681 | 1,0753644 | 0,31046496  |
| 7603 | ENSG00000188227 | 0,25072966   | 3,630893715 | 1,9998078 | 0,217063487 |
| 7604 | ENSG00000188229 | -0,547887276 | 6,926569478 | 3,7205234 | 0,066116567 |
| 7605 | ENSG00000188234 | 0,050374088  | 4,080397639 | 0,1082903 | 0,796913102 |
| 7606 | ENSG00000188243 | 0,231441205  | 5,554680763 | 0,9592305 | 0,33752191  |
| 7607 | ENSG00000188257 | 0,385231349  | 7,445110603 | 0,5373326 | 0,470910083 |
| 7608 | ENSG00000188283 | 0,039832663  | 4,273908341 | 0,081464  | 0,782063251 |
| 7609 | ENSG00000188313 | -0,515993483 | 5,497408988 | 5,8497464 | 0,023854262 |

|      |                 |              |             |           |             |
|------|-----------------|--------------|-------------|-----------|-------------|
| 7610 | ENSG00000188321 | 0,02199288   | 4,666146743 | 0,0208243 | 0,88650952  |
| 7611 | ENSG00000188342 | -0,415609178 | 4,979365696 | 4,7683592 | 0,03939244  |
| 7612 | ENSG00000188343 | 0,011388239  | 5,080335006 | 0,0049009 | 0,944790563 |
| 7613 | ENSG00000188352 | 0,007186025  | 6,437061005 | 0,002048  | 0,964292688 |
| 7614 | ENSG00000188419 | -0,026425459 | 4,889325015 | 0,0275889 | 0,869523367 |
| 7615 | ENSG00000188428 | -0,026404349 | 3,66937347  | 0,0398738 | 0,943062252 |
| 7616 | ENSG00000188529 | -0,061443506 | 6,458599862 | 0,1696171 | 0,684244077 |
| 7617 | ENSG00000188536 | 2,088463784  | 6,031125856 | 15,375851 | 0,000679087 |
| 7618 | ENSG00000188549 | -0,261577054 | 5,540267212 | 1,1249543 | 0,299812359 |
| 7619 | ENSG00000188554 | 0,211097806  | 7,236009523 | 3,6884555 | 0,067168084 |
| 7620 | ENSG00000188559 | -0,035955752 | 6,142550871 | 0,0386553 | 0,845851663 |
| 7621 | ENSG00000188612 | 0,006543757  | 6,270621483 | 0,002601  | 0,959762051 |
| 7622 | ENSG00000188636 | -0,020167432 | 5,052549896 | 0,0160334 | 0,900333713 |
| 7623 | ENSG00000188641 | 0,222658453  | 5,954824591 | 0,7558138 | 0,393580703 |
| 7624 | ENSG00000188643 | -0,2343633   | 4,876287343 | 1,4987575 | 0,233195416 |
| 7625 | ENSG00000188647 | -0,133797972 | 6,799090561 | 0,3763816 | 0,54553706  |
| 7626 | ENSG00000188677 | -0,539794983 | 5,462706017 | 5,2571373 | 0,031285496 |
| 7627 | ENSG00000188690 | -0,195977629 | 5,271361272 | 2,0156488 | 0,168991202 |
| 7628 | ENSG00000188706 | -0,393116794 | 4,086967332 | 4,9219744 | 0,036615074 |
| 7629 | ENSG00000188725 | 0,041886024  | 4,575390354 | 0,0510073 | 0,823304798 |
| 7630 | ENSG00000188730 | -0,557883612 | 4,687512917 | 3,4684041 | 0,075312701 |
| 7631 | ENSG00000188738 | -0,081969414 | 4,603101738 | 0,1012354 | 0,753209153 |
| 7632 | ENSG00000188783 | 0,431389339  | 6,938391652 | 1,4716844 | 0,237333239 |
| 7633 | ENSG00000188785 | -0,056061142 | 4,283686815 | 0,2253183 | 0,728561487 |
| 7634 | ENSG00000188786 | 0,049946019  | 4,060865697 | 0,0898116 | 0,793427104 |
| 7635 | ENSG00000188801 | 0,013397168  | 3,40627721  | 0,0054648 | 0,941706853 |
| 7636 | ENSG00000188811 | 0,029617669  | 5,112334    | 0,0314481 | 0,860789332 |
| 7637 | ENSG00000188818 | -0,110510343 | 3,715598678 | 0,1549761 | 0,697432858 |
| 7638 | ENSG00000188846 | 0,040490506  | 7,992878093 | 0,0445936 | 0,834604    |
| 7639 | ENSG00000188856 | -0,335519698 | 4,453857283 | 1,6132947 | 0,216667624 |
| 7640 | ENSG00000188895 | 0,06719083   | 5,613351739 | 0,1825629 | 0,673134122 |
| 7641 | ENSG00000188906 | 0,108913944  | 5,826974505 | 0,4430964 | 0,512220732 |
| 7642 | ENSG00000188917 | -0,083439157 | 4,391973788 | 0,4027226 | 0,531896897 |
| 7643 | ENSG00000188921 | 0,119619932  | 4,080962828 | 0,5039277 | 0,484880355 |
| 7644 | ENSG00000188938 | 0,095123522  | 5,471907452 | 1,1113363 | 0,302650186 |
| 7645 | ENSG00000188976 | -0,024974047 | 4,700363456 | 0,022358  | 0,882435871 |
| 7646 | ENSG00000188994 | -0,090804935 | 6,94410048  | 0,3451178 | 0,562585761 |
| 7647 | ENSG00000189014 | -0,310684249 | 3,729001063 | 3,3209353 | 0,109738245 |
| 7648 | ENSG00000189042 | -0,107847704 | 3,468783578 | 0,3928357 | 0,624245585 |
| 7649 | ENSG00000189043 | -0,793349586 | 9,322748449 | 8,8304604 | 0,006807482 |
| 7650 | ENSG00000189056 | 0,213814993  | 5,899572789 | 0,1737412 | 0,680653923 |
| 7651 | ENSG00000189058 | -1,629290576 | 6,934080915 | 26,503739 | 3,18657E-05 |
| 7652 | ENSG00000189060 | -0,300236829 | 5,779901976 | 3,0007221 | 0,096553725 |
| 7653 | ENSG00000189067 | -0,390898019 | 6,122712148 | 3,7816192 | 0,064085623 |
| 7654 | ENSG00000189077 | -0,216018909 | 5,293614247 | 1,008395  | 0,325685646 |
| 7655 | ENSG00000189079 | 0,0972523    | 5,896595902 | 0,8701585 | 0,360521114 |
| 7656 | ENSG00000189091 | 0,149904841  | 6,530582229 | 1,3984347 | 0,248967072 |
| 7657 | ENSG00000189136 | 0,002135782  | 3,448963364 | 0,0002045 | 0,988712617 |
| 7658 | ENSG00000189144 | 0,099714161  | 3,53114606  | 0,5559486 | 0,617313284 |
| 7659 | ENSG00000189164 | 0,069052663  | 3,82227288  | 0,1986153 | 0,701491181 |
| 7660 | ENSG00000189171 | -0,312795585 | 5,059300956 | 2,3432531 | 0,139399793 |
| 7661 | ENSG00000189180 | -0,059889615 | 6,118552171 | 0,243421  | 0,626385396 |
| 7662 | ENSG00000189184 | 0,38037429   | 5,261589078 | 0,7860835 | 0,3844197   |
| 7663 | ENSG00000189195 | 0,169788016  | 4,26638927  | 1,0453227 | 0,317169568 |
| 7664 | ENSG00000189212 | -0,222943278 | 6,966793219 | 0,2887036 | 0,596188117 |
| 7665 | ENSG00000189221 | -0,192940077 | 7,195787274 | 0,4849162 | 0,493148033 |
| 7666 | ENSG00000189223 | 0,137038557  | 4,985908613 | 0,152378  | 0,699847627 |
| 7667 | ENSG00000189241 | 0,201736691  | 6,449819111 | 2,9682731 | 0,098221494 |
| 7668 | ENSG00000189266 | -0,003087548 | 6,756147044 | 0,0002092 | 0,988583165 |

|      |                 |              |             |           |             |
|------|-----------------|--------------|-------------|-----------|-------------|
| 7669 | ENSG00000189306 | -0,10113327  | 4,268170176 | 0,1508549 | 0,701274378 |
| 7670 | ENSG00000189308 | 0,120450526  | 4,039546256 | 0,9847014 | 0,434670387 |
| 7671 | ENSG00000189319 | 0,194290882  | 4,450464791 | 0,7932897 | 0,382285242 |
| 7672 | ENSG00000189339 | 0,285920017  | 5,124038672 | 1,9979077 | 0,170844    |
| 7673 | ENSG00000189343 | 0,105831646  | 6,259317336 | 0,3409407 | 0,564942385 |
| 7674 | ENSG00000189350 | -0,873817392 | 4,5509864   | 10,204707 | 0,004015028 |
| 7675 | ENSG00000189362 | -0,074466841 | 3,689738008 | 0,2462012 | 0,674560089 |
| 7676 | ENSG00000189369 | 0,021785617  | 3,64466406  | 0,0340993 | 0,917853628 |
| 7677 | ENSG00000189403 | -0,151147231 | 7,784438567 | 0,5106936 | 0,481994859 |
| 7678 | ENSG00000189423 | 0,200653492  | 4,06522339  | 0,364061  | 0,552135312 |
| 7679 | ENSG00000196072 | 0,06744139   | 4,447987587 | 0,1036866 | 0,750344001 |
| 7680 | ENSG00000196083 | 0,180439016  | 4,086912016 | 0,7400168 | 0,39849115  |
| 7681 | ENSG00000196109 | 0,919078525  | 3,73403589  | 11,401857 | 0,002589035 |
| 7682 | ENSG00000196110 | 0,370250796  | 3,480750541 | 6,4644055 | 0,06734304  |
| 7683 | ENSG00000196116 | 0,081102128  | 4,331595976 | 0,7657289 | 0,541483362 |
| 7684 | ENSG00000196126 | 0,834499386  | 6,32811655  | 10,083471 | 0,004201892 |
| 7685 | ENSG00000196139 | 0,280255116  | 4,939165737 | 0,6838695 | 0,416713726 |
| 7686 | ENSG00000196141 | -0,029704931 | 6,24542523  | 0,0825656 | 0,776401885 |
| 7687 | ENSG00000196150 | -0,008306709 | 3,855824523 | 0,0036129 | 0,95258537  |
| 7688 | ENSG00000196151 | -0,149931394 | 3,647583469 | 1,5057938 | 0,436242433 |
| 7689 | ENSG00000196154 | -0,315287777 | 6,196392277 | 1,1812303 | 0,288310692 |
| 7690 | ENSG00000196159 | 0,264985405  | 6,818552189 | 2,9938023 | 0,096900019 |
| 7691 | ENSG00000196177 | -0,101433883 | 6,206699451 | 0,2536469 | 0,619285424 |
| 7692 | ENSG00000196182 | -0,280431996 | 5,517437424 | 2,7413954 | 0,111295518 |
| 7693 | ENSG00000196187 | -0,153714578 | 4,777758972 | 0,3932557 | 0,53673912  |
| 7694 | ENSG00000196199 | 0,268355901  | 6,126414374 | 5,5084778 | 0,02782427  |
| 7695 | ENSG00000196205 | 0,445770888  | 11,17475632 | 2,8026928 | 0,107548326 |
| 7696 | ENSG00000196214 | 0,020320035  | 4,450985491 | 0,0245409 | 0,876871982 |
| 7697 | ENSG00000196227 | 0,004716198  | 4,785603079 | 0,0007907 | 0,977808595 |
| 7698 | ENSG00000196230 | -0,222629694 | 7,44204451  | 1,3165906 | 0,26294381  |
| 7699 | ENSG00000196233 | -0,034418713 | 6,19972942  | 0,1181202 | 0,73417841  |
| 7700 | ENSG00000196235 | 0,268931255  | 5,568318803 | 1,8679249 | 0,184861469 |
| 7701 | ENSG00000196236 | 0,038903419  | 4,938657808 | 0,0570119 | 0,813387107 |
| 7702 | ENSG00000196247 | 0,122986537  | 3,795948456 | 0,6890109 | 0,461344681 |
| 7703 | ENSG00000196262 | -0,10398634  | 7,92294781  | 0,417338  | 0,524609162 |
| 7704 | ENSG00000196263 | 0,264870061  | 4,133480902 | 8,0876883 | 0,095199607 |
| 7705 | ENSG00000196268 | -0,11285365  | 5,152913372 | 0,3598718 | 0,554413819 |
| 7706 | ENSG00000196275 | -0,034698201 | 5,536643355 | 0,0528333 | 0,820226632 |
| 7707 | ENSG00000196290 | -0,235080463 | 4,063881813 | 3,0111733 | 0,161146559 |
| 7708 | ENSG00000196295 | -0,100203231 | 5,870830667 | 0,271118  | 0,607535495 |
| 7709 | ENSG00000196305 | -0,023920751 | 6,82302516  | 0,0582974 | 0,811329382 |
| 7710 | ENSG00000196312 | -0,030586619 | 4,51185496  | 0,0273677 | 0,870042664 |
| 7711 | ENSG00000196313 | 0,037830223  | 5,132687991 | 0,0231033 | 0,880507783 |
| 7712 | ENSG00000196323 | -0,044892257 | 6,695381723 | 0,1268659 | 0,724923481 |
| 7713 | ENSG00000196352 | 0,055253934  | 6,406511775 | 0,0256521 | 0,874144457 |
| 7714 | ENSG00000196363 | 0,118981456  | 4,140468474 | 0,7101693 | 0,523561341 |
| 7715 | ENSG00000196365 | 0,066804882  | 5,30093125  | 0,1197916 | 0,732391429 |
| 7716 | ENSG00000196367 | 0,155106537  | 5,847455542 | 0,4581577 | 0,505204834 |
| 7717 | ENSG00000196369 | 0,291036796  | 5,643639525 | 1,4011213 | 0,248567537 |
| 7718 | ENSG00000196387 | 0,095057771  | 3,965476492 | 0,8800017 | 0,583017601 |
| 7719 | ENSG00000196396 | 0,064899943  | 4,950681572 | 0,2505184 | 0,683899916 |
| 7720 | ENSG00000196405 | 0,375739694  | 4,900838647 | 5,3512198 | 0,029949833 |
| 7721 | ENSG00000196411 | -0,011269102 | 4,516320903 | 0,0032923 | 0,954736554 |
| 7722 | ENSG00000196417 | -0,064687923 | 4,08458649  | 0,2372717 | 0,708104895 |
| 7723 | ENSG00000196418 | 0,361824821  | 4,464358603 | 1,774035  | 0,195869637 |
| 7724 | ENSG00000196419 | -0,224738043 | 7,546589175 | 1,7045729 | 0,204538014 |
| 7725 | ENSG00000196428 | 0,27338545   | 5,534128155 | 1,8268221 | 0,189584353 |
| 7726 | ENSG00000196437 | 0,008472136  | 3,656313281 | 0,0019571 | 0,965094178 |
| 7727 | ENSG00000196440 | 0,137399597  | 4,248039651 | 0,6355208 | 0,433451165 |

|      |                 |              |             |           |             |
|------|-----------------|--------------|-------------|-----------|-------------|
| 7728 | ENSG00000196455 | 0,014645478  | 5,224452705 | 0,0252809 | 0,875045485 |
| 7729 | ENSG00000196458 | -0,103047619 | 4,799998576 | 0,6424877 | 0,474687301 |
| 7730 | ENSG00000196459 | -0,001694796 | 3,632765421 | 0,0001659 | 0,997961944 |
| 7731 | ENSG00000196470 | -0,136797474 | 3,590906163 | 0,661354  | 0,50533905  |
| 7732 | ENSG00000196482 | -0,323242664 | 5,654758258 | 1,0631209 | 0,31317387  |
| 7733 | ENSG00000196498 | -0,034831519 | 5,487015082 | 0,0254826 | 0,874557263 |
| 7734 | ENSG00000196502 | 0,094731431  | 4,040891709 | 0,1992658 | 0,659468419 |
| 7735 | ENSG00000196504 | -0,094657074 | 6,371405247 | 0,4138876 | 0,526326136 |
| 7736 | ENSG00000196505 | 0,044696497  | 5,52519037  | 0,0931778 | 0,762904598 |
| 7737 | ENSG00000196507 | -0,030448338 | 4,404270087 | 0,0528924 | 0,868252067 |
| 7738 | ENSG00000196510 | -0,302853837 | 4,805747733 | 10,424875 | 0,017199042 |
| 7739 | ENSG00000196511 | -0,257773548 | 3,506118494 | 4,0606298 | 0,220768038 |
| 7740 | ENSG00000196526 | 0,231027683  | 4,990153671 | 1,122869  | 0,300250282 |
| 7741 | ENSG00000196531 | 0,233138319  | 8,183789538 | 1,4118175 | 0,24682141  |
| 7742 | ENSG00000196535 | 0,377733376  | 6,536621596 | 1,7446188 | 0,199483882 |
| 7743 | ENSG00000196547 | -0,327718541 | 5,424361662 | 1,4527665 | 0,240280272 |
| 7744 | ENSG00000196549 | 0,00061566   | 5,228292054 | 1,198E-06 | 0,999136118 |
| 7745 | ENSG00000196562 | 0,244287712  | 5,08009229  | 2,1189328 | 0,158937437 |
| 7746 | ENSG00000196569 | -0,095537929 | 9,019271817 | 0,2300296 | 0,635997562 |
| 7747 | ENSG00000196576 | 0,625262831  | 5,713379281 | 9,6272918 | 0,004995519 |
| 7748 | ENSG00000196586 | 0,049155443  | 5,266941456 | 0,13794   | 0,713708751 |
| 7749 | ENSG00000196588 | -0,096689297 | 4,135730298 | 0,1263616 | 0,725458325 |
| 7750 | ENSG00000196591 | -0,158409052 | 5,55362585  | 2,5975118 | 0,142931824 |
| 7751 | ENSG00000196597 | -0,013169062 | 3,69950503  | 0,0100985 | 0,933627946 |
| 7752 | ENSG00000196605 | 0,147906542  | 3,672281341 | 1,2675778 | 0,456031872 |
| 7753 | ENSG00000196616 | 0,244924327  | 8,923697896 | 0,1760265 | 0,678684574 |
| 7754 | ENSG00000196628 | 0,098067267  | 7,599696642 | 0,3558098 | 0,556632208 |
| 7755 | ENSG00000196642 | -0,170047199 | 5,180879702 | 0,6882447 | 0,415248613 |
| 7756 | ENSG00000196646 | 0,060744751  | 3,993639023 | 0,3488779 | 0,695791505 |
| 7757 | ENSG00000196652 | -0,139378924 | 4,049330054 | 2,0768478 | 0,400370426 |
| 7758 | ENSG00000196655 | -0,048695021 | 4,35205538  | 0,1191915 | 0,784282308 |
| 7759 | ENSG00000196656 | -0,1036208   | 5,533559883 | 0,097047  | 0,758195116 |
| 7760 | ENSG00000196663 | 0,20785823   | 4,540502648 | 1,0347824 | 0,319568801 |
| 7761 | ENSG00000196670 | -0,025549905 | 4,594421417 | 0,0445857 | 0,925531502 |
| 7762 | ENSG00000196678 | -0,118523845 | 3,767214017 | 0,6270323 | 0,551138511 |
| 7763 | ENSG00000196683 | 0,03524962   | 7,212137732 | 0,035366  | 0,852472104 |
| 7764 | ENSG00000196693 | -0,182468959 | 5,037646797 | 1,1755863 | 0,289437311 |
| 7765 | ENSG00000196704 | -0,034085655 | 5,532318234 | 0,0469305 | 0,83039395  |
| 7766 | ENSG00000196705 | -0,150453847 | 4,926601952 | 0,8460941 | 0,367160692 |
| 7767 | ENSG00000196712 | 0,045073727  | 7,441446336 | 0,1275448 | 0,724220303 |
| 7768 | ENSG00000196715 | 0,288746408  | 5,545209251 | 1,4936496 | 0,233969025 |
| 7769 | ENSG00000196724 | -0,038627938 | 4,121341168 | 0,0842654 | 0,839225723 |
| 7770 | ENSG00000196730 | 1,220166259  | 4,737941747 | 5,7471087 | 0,02498632  |
| 7771 | ENSG00000196735 | 1,473700596  | 4,624315605 | 18,408029 | 0,000270515 |
| 7772 | ENSG00000196743 | 0,144895777  | 5,544510223 | 1,3399115 | 0,258831475 |
| 7773 | ENSG00000196757 | -0,025199969 | 3,945394607 | 0,0367563 | 0,926180428 |
| 7774 | ENSG00000196776 | 0,007883852  | 6,891332967 | 0,0024384 | 0,96104035  |
| 7775 | ENSG00000196781 | 0,419132081  | 3,860124332 | 2,5164174 | 0,126254115 |
| 7776 | ENSG00000196792 | -0,088747765 | 6,039701167 | 0,2767387 | 0,603858418 |
| 7777 | ENSG00000196821 | -0,450979731 | 6,963103561 | 6,6855667 | 0,016495613 |
| 7778 | ENSG00000196850 | -0,591639014 | 6,272394498 | 5,8981776 | 0,023340014 |
| 7779 | ENSG00000196862 | 0,084176031  | 5,442921269 | 0,2083594 | 0,652316898 |
| 7780 | ENSG00000196865 | 0,024526799  | 7,456306424 | 0,0157346 | 0,901261668 |
| 7781 | ENSG00000196867 | -0,142206201 | 3,93760298  | 1,989185  | 0,401957931 |
| 7782 | ENSG00000196873 | -0,361271945 | 5,887874819 | 8,1656643 | 0,008861105 |
| 7783 | ENSG00000196911 | -0,102661892 | 5,317058172 | 0,2524139 | 0,620133746 |
| 7784 | ENSG00000196912 | 0,083767437  | 5,927177192 | 0,3021526 | 0,587808753 |
| 7785 | ENSG00000196914 | 0,082094685  | 8,310039584 | 0,4104212 | 0,528035127 |
| 7786 | ENSG00000196922 | -0,454487228 | 5,372677617 | 11,696356 | 0,002322372 |

|      |                 |              |             |           |             |
|------|-----------------|--------------|-------------|-----------|-------------|
| 7787 | ENSG00000196924 | 0,116826463  | 8,19449621  | 0,1867501 | 0,669640377 |
| 7788 | ENSG00000196935 | -0,102265457 | 4,142007084 | 0,2539241 | 0,619095025 |
| 7789 | ENSG00000196937 | 0,223756137  | 6,034118512 | 2,1907423 | 0,152345409 |
| 7790 | ENSG00000196943 | 0,263700013  | 4,230438571 | 3,1153878 | 0,120741415 |
| 7791 | ENSG00000196950 | 0,454506628  | 5,005676263 | 3,5123235 | 0,073610405 |
| 7792 | ENSG00000196954 | -0,203933091 | 5,291543687 | 0,7044416 | 0,409892808 |
| 7793 | ENSG00000196961 | 0,080505256  | 5,091652344 | 0,1925862 | 0,664847822 |
| 7794 | ENSG00000196967 | 0,106711675  | 4,320530206 | 0,5629211 | 0,524169608 |
| 7795 | ENSG00000196968 | 0,151032275  | 4,325672323 | 0,8996088 | 0,352699097 |
| 7796 | ENSG00000196975 | 0,455841883  | 5,019975801 | 4,2825365 | 0,049864543 |
| 7797 | ENSG00000196998 | -0,047271816 | 4,425049653 | 0,130286  | 0,72260531  |
| 7798 | ENSG00000197006 | -0,084174157 | 5,787190368 | 0,3409222 | 0,564941212 |
| 7799 | ENSG00000197008 | -0,03688066  | 3,827548363 | 0,0657886 | 0,853019653 |
| 7800 | ENSG00000197013 | 0,196604227  | 3,745874111 | 1,1051428 | 0,304007923 |
| 7801 | ENSG00000197016 | 0,144176781  | 4,088612543 | 1,5734373 | 0,327166406 |
| 7802 | ENSG00000197020 | -0,050282431 | 4,062983024 | 0,0787591 | 0,781482865 |
| 7803 | ENSG00000197024 | 0,072755575  | 4,082303882 | 0,3625755 | 0,675961482 |
| 7804 | ENSG00000197037 | 0,065555625  | 3,604475414 | 0,1610863 | 0,774375473 |
| 7805 | ENSG00000197043 | -0,110300794 | 7,793329702 | 0,3431198 | 0,563710574 |
| 7806 | ENSG00000197044 | 0,028488866  | 4,570028735 | 0,0132631 | 0,909308492 |
| 7807 | ENSG00000197045 | -0,155328292 | 6,298787324 | 0,2961281 | 0,591531591 |
| 7808 | ENSG00000197050 | -0,004613023 | 3,754028178 | 0,0005808 | 0,980979957 |
| 7809 | ENSG00000197056 | 0,131797474  | 4,034369944 | 0,9699471 | 0,395142187 |
| 7810 | ENSG00000197061 | 0,177343391  | 4,819574718 | 0,4579924 | 0,505280911 |
| 7811 | ENSG00000197062 | -0,086023308 | 4,242713326 | 0,2965832 | 0,653215634 |
| 7812 | ENSG00000197063 | 0,057560622  | 4,375633236 | 0,1146235 | 0,737996916 |
| 7813 | ENSG00000197077 | 0,106245031  | 5,196467332 | 0,180778  | 0,674637985 |
| 7814 | ENSG00000197081 | -0,171404899 | 7,015319563 | 0,6384876 | 0,432394167 |
| 7815 | ENSG00000197102 | 0,176311446  | 8,956953224 | 0,7975972 | 0,38099174  |
| 7816 | ENSG00000197111 | 0,124495402  | 6,644494191 | 0,8833296 | 0,356977144 |
| 7817 | ENSG00000197121 | -0,54482709  | 6,088986247 | 3,2983038 | 0,082345983 |
| 7818 | ENSG00000197128 | -0,138742297 | 4,755744943 | 1,0167359 | 0,323706586 |
| 7819 | ENSG00000197140 | 0,342820235  | 3,845982232 | 1,9268932 | 0,178334873 |
| 7820 | ENSG00000197142 | 0,158525415  | 4,194002941 | 0,5690213 | 0,458265296 |
| 7821 | ENSG00000197147 | 0,026065508  | 4,098395213 | 0,019896  | 0,889050053 |
| 7822 | ENSG00000197157 | 0,1741733    | 6,456468123 | 1,1845945 | 0,287641929 |
| 7823 | ENSG00000197170 | -0,160329295 | 6,009719521 | 1,37034   | 0,253640825 |
| 7824 | ENSG00000197183 | 0,047293896  | 3,709699266 | 0,0542339 | 0,855835921 |
| 7825 | ENSG00000197217 | -0,227813267 | 6,081995854 | 2,2987787 | 0,143034373 |
| 7826 | ENSG00000197223 | -0,284322912 | 4,111615711 | 2,8170348 | 0,106740269 |
| 7827 | ENSG00000197226 | 0,327868907  | 5,588689829 | 1,7339453 | 0,200815679 |
| 7828 | ENSG00000197256 | 0,298991542  | 7,222619429 | 2,7686601 | 0,109627843 |
| 7829 | ENSG00000197258 | 0,317969543  | 5,721501692 | 2,9448394 | 0,099528112 |
| 7830 | ENSG00000197265 | -0,05400829  | 4,02733192  | 0,1612083 | 0,753155417 |
| 7831 | ENSG00000197296 | -0,137001026 | 7,122653946 | 0,2689057 | 0,60899617  |
| 7832 | ENSG00000197302 | -0,091980881 | 4,763621105 | 0,5581345 | 0,462519776 |
| 7833 | ENSG00000197312 | 0,063183374  | 5,851280783 | 0,1229325 | 0,729050871 |
| 7834 | ENSG00000197321 | 0,350796116  | 8,734422845 | 2,4240291 | 0,133075451 |
| 7835 | ENSG00000197323 | 0,066518316  | 5,859522987 | 0,3350494 | 0,568279996 |
| 7836 | ENSG00000197324 | 0,128767358  | 5,850288606 | 0,4661665 | 0,50154277  |
| 7837 | ENSG00000197329 | 0,089266008  | 4,434722397 | 0,2468805 | 0,62397346  |
| 7838 | ENSG00000197343 | -0,03013833  | 6,318109281 | 0,0513182 | 0,822769794 |
| 7839 | ENSG00000197345 | -0,488951297 | 4,793101195 | 7,2936013 | 0,012727603 |
| 7840 | ENSG00000197375 | 0,173555552  | 4,010400266 | 0,7083149 | 0,40862763  |
| 7841 | ENSG00000197381 | -0,143529412 | 4,799838767 | 0,9776384 | 0,333006901 |
| 7842 | ENSG00000197386 | -0,015148344 | 6,040548613 | 0,0058369 | 0,939758845 |
| 7843 | ENSG00000197429 | 0,320038521  | 4,133077168 | 5,3774841 | 0,047094856 |
| 7844 | ENSG00000197442 | 0,324828053  | 5,01065489  | 2,1397654 | 0,156990303 |
| 7845 | ENSG00000197448 | -0,132279504 | 6,574452892 | 0,8649654 | 0,361938466 |

|      |                 |              |             |           |             |
|------|-----------------|--------------|-------------|-----------|-------------|
| 7846 | ENSG00000197451 | -0,286104252 | 5,549064201 | 3,234152  | 0,085192538 |
| 7847 | ENSG00000197461 | 0,159727737  | 4,150934134 | 1,3042809 | 0,321571819 |
| 7848 | ENSG00000197498 | -0,41925703  | 4,838780386 | 5,2562473 | 0,031298445 |
| 7849 | ENSG00000197535 | -0,039049327 | 5,848472179 | 0,0871043 | 0,770517013 |
| 7850 | ENSG00000197536 | 0,001564171  | 3,756875686 | 4,381E-05 | 0,994775904 |
| 7851 | ENSG00000197548 | 0,00725672   | 4,523140191 | 0,003331  | 0,998178681 |
| 7852 | ENSG00000197555 | 0,492478325  | 3,904021679 | 5,360997  | 0,029814725 |
| 7853 | ENSG00000197557 | -0,064611569 | 3,820979446 | 0,1121957 | 0,740679027 |
| 7854 | ENSG00000197563 | -0,163621992 | 5,6471471   | 0,8005507 | 0,380152136 |
| 7855 | ENSG00000197565 | -0,318509318 | 4,864509936 | 1,865014  | 0,185191162 |
| 7856 | ENSG00000197579 | 0,041156083  | 4,894456923 | 0,0576854 | 0,812309751 |
| 7857 | ENSG00000197580 | -0,276600181 | 6,240663539 | 1,4843587 | 0,235384568 |
| 7858 | ENSG00000197586 | -0,094371041 | 5,842855916 | 0,3073304 | 0,584647868 |
| 7859 | ENSG00000197594 | 0,139629561  | 4,121213015 | 0,6458725 | 0,429780587 |
| 7860 | ENSG00000197601 | -0,140977662 | 6,424483239 | 0,5324847 | 0,472895394 |
| 7861 | ENSG00000197603 | 0,052418081  | 6,275070935 | 0,1150801 | 0,737496062 |
| 7862 | ENSG00000197608 | 0,169321129  | 4,373911257 | 1,5261733 | 0,233472742 |
| 7863 | ENSG00000197614 | -1,543801592 | 6,461768493 | 13,095515 | 0,001433809 |
| 7864 | ENSG00000197616 | -0,856923093 | 13,41545519 | 3,0129802 | 0,095915151 |
| 7865 | ENSG00000197619 | -0,188143731 | 4,552037257 | 1,1066173 | 0,30369295  |
| 7866 | ENSG00000197620 | -0,154178924 | 4,019650529 | 1,63737   | 0,358545522 |
| 7867 | ENSG00000197622 | 0,122499884  | 5,68680121  | 0,4998557 | 0,486631142 |
| 7868 | ENSG00000197629 | 0,078431648  | 5,067160695 | 0,1031325 | 0,750988335 |
| 7869 | ENSG00000197694 | 0,342161312  | 8,668203897 | 2,5275301 | 0,125461788 |
| 7870 | ENSG00000197702 | 0,180951133  | 6,764843117 | 0,9887925 | 0,330334743 |
| 7871 | ENSG00000197712 | 0,398371907  | 5,434310116 | 8,5378519 | 0,007628272 |
| 7872 | ENSG00000197713 | -0,341765229 | 5,168120842 | 5,1084214 | 0,033534885 |
| 7873 | ENSG00000197714 | 0,183974682  | 5,752307086 | 1,4583008 | 0,239413331 |
| 7874 | ENSG00000197724 | 0,143393025  | 4,883859847 | 0,4939739 | 0,489179195 |
| 7875 | ENSG00000197728 | -0,238901856 | 6,391266604 | 0,642932  | 0,430818258 |
| 7876 | ENSG00000197746 | 0,119352099  | 9,859520463 | 0,5017027 | 0,485811162 |
| 7877 | ENSG00000197747 | 0,119702677  | 5,98957571  | 0,1726916 | 0,681563552 |
| 7878 | ENSG00000197756 | -0,044177449 | 8,794389553 | 0,0408222 | 0,841649402 |
| 7879 | ENSG00000197763 | 0,090808024  | 3,519624012 | 0,6091396 | 0,625835978 |
| 7880 | ENSG00000197766 | -0,411134257 | 7,016412258 | 1,1944513 | 0,285694341 |
| 7881 | ENSG00000197771 | -0,001124792 | 5,546456027 | 0,0001031 | 0,991986851 |
| 7882 | ENSG00000197776 | 0,141749932  | 4,064468334 | 1,0090769 | 0,350858045 |
| 7883 | ENSG00000197779 | 0,112748815  | 4,270697981 | 0,6794532 | 0,446033697 |
| 7884 | ENSG00000197780 | -0,282471913 | 4,571283912 | 2,1277624 | 0,158108636 |
| 7885 | ENSG00000197782 | 0,068334105  | 4,783969858 | 0,2214332 | 0,64235586  |
| 7886 | ENSG00000197798 | -0,207050409 | 4,162549913 | 4,2963257 | 0,204708216 |
| 7887 | ENSG00000197818 | -0,157982713 | 4,127409191 | 0,890773  | 0,355030054 |
| 7888 | ENSG00000197841 | -0,238407365 | 5,200411023 | 1,5317452 | 0,228276639 |
| 7889 | ENSG00000197852 | -0,174186385 | 4,791729659 | 0,5381817 | 0,470563784 |
| 7890 | ENSG00000197857 | -0,119156712 | 4,646980689 | 0,8019523 | 0,379710452 |
| 7891 | ENSG00000197860 | 0,26817037   | 4,012823964 | 2,5407014 | 0,124530264 |
| 7892 | ENSG00000197863 | -0,074251064 | 3,961300197 | 0,3444821 | 0,689225286 |
| 7893 | ENSG00000197872 | -0,061715526 | 4,101556955 | 0,138865  | 0,739168846 |
| 7894 | ENSG00000197879 | 0,2678221    | 6,718678387 | 1,3605732 | 0,255333189 |
| 7895 | ENSG00000197885 | -0,307011176 | 4,139573999 | 5,7049069 | 0,062885025 |
| 7896 | ENSG00000197892 | 0,286145901  | 4,922760516 | 4,22655   | 0,051231255 |
| 7897 | ENSG00000197893 | 0,314580386  | 9,384009827 | 0,9555315 | 0,338436534 |
| 7898 | ENSG00000197894 | -0,067526463 | 6,950497016 | 0,1022566 | 0,752010896 |
| 7899 | ENSG00000197912 | -0,001903124 | 6,128086787 | 0,0001058 | 0,991882732 |
| 7900 | ENSG00000197915 | 0,056654271  | 4,239515681 | 0,0190315 | 0,891471121 |
| 7901 | ENSG00000197928 | 0,098804225  | 3,956496803 | 0,8143302 | 0,569981543 |
| 7902 | ENSG00000197930 | 0,034037295  | 4,959128909 | 0,0694981 | 0,794396989 |
| 7903 | ENSG00000197937 | -0,040100928 | 4,541063612 | 0,1039338 | 0,782434341 |
| 7904 | ENSG00000197943 | -0,249644561 | 4,480457288 | 2,4838454 | 0,12861074  |

|      |                 |              |             |           |             |
|------|-----------------|--------------|-------------|-----------|-------------|
| 7905 | ENSG00000197956 | 0,073243441  | 7,701314974 | 0,0783492 | 0,782036964 |
| 7906 | ENSG00000197958 | 0,331099378  | 8,042074555 | 2,2147492 | 0,150215171 |
| 7907 | ENSG00000197959 | -0,198335532 | 3,704747599 | 1,434024  | 0,257527126 |
| 7908 | ENSG00000197961 | -0,021092253 | 5,514524134 | 0,0345982 | 0,854057365 |
| 7909 | ENSG00000197965 | -0,216496644 | 6,26729883  | 0,8532843 | 0,365168689 |
| 7910 | ENSG00000197969 | -0,187798026 | 7,827312995 | 1,8592013 | 0,185806261 |
| 7911 | ENSG00000197971 | 0,212787152  | 5,386022898 | 1,6874405 | 0,206748816 |
| 7912 | ENSG00000197978 | 0,110682556  | 3,640525229 | 0,3737431 | 0,600791562 |
| 7913 | ENSG00000197982 | -0,309428671 | 4,534529555 | 2,8614467 | 0,104167125 |
| 7914 | ENSG00000198000 | 0,000718752  | 5,003422559 | 4,028E-05 | 0,994990709 |
| 7915 | ENSG00000198001 | -0,107890461 | 4,27015104  | 0,6836271 | 0,507083875 |
| 7916 | ENSG00000198015 | -0,198401165 | 5,841932125 | 1,5109545 | 0,231361215 |
| 7917 | ENSG00000198018 | 0,204975234  | 4,405123615 | 0,603834  | 0,444999784 |
| 7918 | ENSG00000198034 | 0,179392578  | 8,801225234 | 0,8506017 | 0,365883205 |
| 7919 | ENSG00000198040 | 0,066829543  | 5,59514745  | 0,2652883 | 0,611384254 |
| 7920 | ENSG00000198042 | -0,083737906 | 4,444307103 | 0,1910785 | 0,666077561 |
| 7921 | ENSG00000198046 | 0,211504985  | 3,545119025 | 1,9199155 | 0,298414644 |
| 7922 | ENSG00000198053 | 0,124331202  | 5,26439925  | 0,3364079 | 0,567521833 |
| 7923 | ENSG00000198060 | -0,159183395 | 4,794670144 | 1,8387798 | 0,243063975 |
| 7924 | ENSG00000198064 | -0,061283456 | 5,390233276 | 0,0554247 | 0,815952689 |
| 7925 | ENSG00000198087 | 0,019613347  | 5,323398736 | 0,0114817 | 0,91559264  |
| 7926 | ENSG00000198093 | -0,108430085 | 3,644667893 | 0,7161554 | 0,574573002 |
| 7927 | ENSG00000198105 | -0,179346023 | 5,056461953 | 1,6805712 | 0,207612656 |
| 7928 | ENSG00000198121 | -0,13691851  | 5,379481821 | 0,271851  | 0,607053203 |
| 7929 | ENSG00000198125 | -0,300846516 | 11,92216958 | 1,5387595 | 0,227204744 |
| 7930 | ENSG00000198130 | -0,134550639 | 5,388370139 | 1,7007423 | 0,215256606 |
| 7931 | ENSG00000198131 | 0,017388856  | 4,903456846 | 0,0129553 | 0,910362439 |
| 7932 | ENSG00000198146 | -0,114952633 | 5,728509853 | 0,4465471 | 0,510598115 |
| 7933 | ENSG00000198160 | 0,047686629  | 5,876921173 | 0,0958434 | 0,759649831 |
| 7934 | ENSG00000198162 | 0,123871699  | 6,753586448 | 0,5206296 | 0,477809644 |
| 7935 | ENSG00000198168 | -0,208851655 | 5,020681832 | 0,8386118 | 0,369250338 |
| 7936 | ENSG00000198169 | 0,166181908  | 3,989976245 | 1,2562043 | 0,369044515 |
| 7937 | ENSG00000198171 | -0,063493771 | 4,205146332 | 0,1315032 | 0,720173598 |
| 7938 | ENSG00000198176 | -0,051014727 | 5,200682575 | 0,1267994 | 0,724997004 |
| 7939 | ENSG00000198189 | 0,038280337  | 5,047730442 | 0,0235634 | 0,879333355 |
| 7940 | ENSG00000198198 | -0,082445682 | 5,2900059   | 0,0932093 | 0,762868726 |
| 7941 | ENSG00000198218 | 0,046240358  | 5,457363846 | 0,1255994 | 0,726240921 |
| 7942 | ENSG00000198225 | -0,085175066 | 3,965362793 | 0,4121222 | 0,615115203 |
| 7943 | ENSG00000198231 | 0,24218777   | 6,4648511   | 5,0664074 | 0,034167076 |
| 7944 | ENSG00000198237 | 0,408791146  | 3,933624089 | 4,6914024 | 0,040872258 |
| 7945 | ENSG00000198242 | 0,126893838  | 7,376141402 | 0,2780431 | 0,603011997 |
| 7946 | ENSG00000198252 | 0,11230868   | 5,031246007 | 0,4924979 | 0,489822213 |
| 7947 | ENSG00000198258 | -0,251105431 | 6,326783673 | 2,2769301 | 0,144861249 |
| 7948 | ENSG00000198265 | 0,139437475  | 6,787224831 | 1,7127922 | 0,203443371 |
| 7949 | ENSG00000198270 | -0,545285015 | 4,011968803 | 6,0104753 | 0,022194443 |
| 7950 | ENSG00000198300 | 0,217094286  | 4,100648691 | 0,8439323 | 0,36776267  |
| 7951 | ENSG00000198301 | 0,015090309  | 5,146373503 | 0,018266  | 0,893657874 |
| 7952 | ENSG00000198315 | 0,1103655    | 5,474602712 | 1,2365894 | 0,277523261 |
| 7953 | ENSG00000198336 | -1,187554388 | 10,77642741 | 10,065457 | 0,004230463 |
| 7954 | ENSG00000198356 | -0,092118287 | 4,656263172 | 0,4682368 | 0,500580099 |
| 7955 | ENSG00000198363 | 0,024334089  | 7,896541224 | 0,0132072 | 0,909498916 |
| 7956 | ENSG00000198369 | 0,25263875   | 4,304109214 | 2,1714578 | 0,154082893 |
| 7957 | ENSG00000198373 | 0,38228297   | 4,300886645 | 4,7904326 | 0,038979171 |
| 7958 | ENSG00000198380 | 0,396917235  | 6,683162559 | 7,1294162 | 0,013627151 |
| 7959 | ENSG00000198382 | 0,183039484  | 4,962589988 | 1,7002079 | 0,205072157 |
| 7960 | ENSG00000198393 | -0,053639748 | 4,38028675  | 0,1025946 | 0,751615726 |
| 7961 | ENSG00000198399 | 0,05608513   | 6,366771508 | 0,2731776 | 0,606165219 |
| 7962 | ENSG00000198406 | 0,184315423  | 4,167198121 | 0,7593018 | 0,392508628 |
| 7963 | ENSG00000198408 | 0,245691431  | 7,680584677 | 3,5609419 | 0,071732734 |



|      |                 |              |             |           |             |
|------|-----------------|--------------|-------------|-----------|-------------|
| 7964 | ENSG00000198416 | -0,311824446 | 4,442090695 | 1,9987676 | 0,17075567  |
| 7965 | ENSG00000198420 | 0,076061083  | 5,777322485 | 0,1970045 | 0,661277256 |
| 7966 | ENSG00000198431 | 0,027448908  | 7,301311715 | 0,017381  | 0,896254165 |
| 7967 | ENSG00000198453 | 0,164085631  | 4,014639989 | 2,4743056 | 0,303713224 |
| 7968 | ENSG00000198455 | 0,299003939  | 3,879141047 | 5,3216539 | 0,09133888  |
| 7969 | ENSG00000198464 | -0,305606133 | 4,98263356  | 2,8851215 | 0,102825023 |
| 7970 | ENSG00000198466 | 0,087157251  | 4,43366407  | 0,1817644 | 0,673805817 |
| 7971 | ENSG00000198467 | -0,375407731 | 8,2390523   | 2,2553357 | 0,146694311 |
| 7972 | ENSG00000198478 | 0,158966641  | 4,784031199 | 0,6707033 | 0,421170996 |
| 7973 | ENSG00000198482 | 0,009009884  | 4,99943668  | 0,0036093 | 0,952610233 |
| 7974 | ENSG00000198492 | 0,002634107  | 5,417902121 | 0,000778  | 0,977986698 |
| 7975 | ENSG00000198498 | -0,106640759 | 3,730530013 | 0,5350295 | 0,608953044 |
| 7976 | ENSG00000198502 | 0,721392749  | 5,037142669 | 7,2420438 | 0,013006979 |
| 7977 | ENSG00000198521 | -0,09657389  | 4,699814396 | 0,5397673 | 0,494261512 |
| 7978 | ENSG00000198522 | -0,154072572 | 4,290752476 | 2,2586899 | 0,339934099 |
| 7979 | ENSG00000198523 | -0,59238863  | 10,89508723 | 1,1082717 | 0,303340055 |
| 7980 | ENSG00000198538 | 0,128842191  | 3,939093393 | 1,3162829 | 0,423566335 |
| 7981 | ENSG00000198551 | 0,215828401  | 3,84471907  | 1,7557774 | 0,211430692 |
| 7982 | ENSG00000198561 | 0,192632344  | 7,072467685 | 1,3912388 | 0,250194964 |
| 7983 | ENSG00000198563 | -0,180322092 | 5,492521671 | 0,7347219 | 0,400157617 |
| 7984 | ENSG00000198585 | -0,070936074 | 5,815132462 | 0,1861115 | 0,670170139 |
| 7985 | ENSG00000198586 | 0,107114851  | 5,556597722 | 0,8248133 | 0,373116957 |
| 7986 | ENSG00000198589 | -0,050288204 | 6,868596928 | 0,1711346 | 0,682905602 |
| 7987 | ENSG00000198604 | 0,046033793  | 4,933099339 | 0,0437081 | 0,836229287 |
| 7988 | ENSG00000198612 | -0,268753533 | 6,061500468 | 1,72443   | 0,202012269 |
| 7989 | ENSG00000198618 | -0,125397458 | 5,530869407 | 0,4781037 | 0,496169799 |
| 7990 | ENSG00000198624 | -0,4243451   | 7,352363618 | 6,6551158 | 0,01671378  |
| 7991 | ENSG00000198625 | 0,007235436  | 6,402556583 | 0,0017668 | 0,966833185 |
| 7992 | ENSG00000198626 | -0,323175488 | 11,56537484 | 0,3625127 | 0,552975319 |
| 7993 | ENSG00000198642 | 0,067677634  | 5,408894393 | 0,2246014 | 0,639994053 |
| 7994 | ENSG00000198646 | -0,073559191 | 4,777841642 | 0,1220629 | 0,729970878 |
| 7995 | ENSG00000198648 | -0,127627324 | 4,946596788 | 1,3013884 | 0,301284225 |
| 7996 | ENSG00000198663 | -0,200562333 | 6,838797356 | 2,706787  | 0,113408267 |
| 7997 | ENSG00000198668 | -0,217409983 | 8,923918819 | 1,6238825 | 0,215171608 |
| 7998 | ENSG00000198677 | -0,22774436  | 7,370631439 | 0,6846052 | 0,416466803 |
| 7999 | ENSG00000198682 | 0,709319489  | 4,797515971 | 5,0085668 | 0,035146751 |
| 8000 | ENSG00000198689 | -0,209184124 | 4,891704709 | 4,1611322 | 0,07452722  |
| 8001 | ENSG00000198690 | -0,154512245 | 5,139905247 | 1,0931223 | 0,306592297 |
| 8002 | ENSG00000198692 | -0,313502892 | 6,333420703 | 0,2031176 | 0,656415642 |
| 8003 | ENSG00000198695 | 0,063230959  | 11,13319072 | 0,0891545 | 0,767913591 |
| 8004 | ENSG00000198700 | -0,007937577 | 5,711317805 | 0,0044718 | 0,947257129 |
| 8005 | ENSG00000198707 | 0,151562212  | 5,314207453 | 0,7336642 | 0,400491738 |
| 8006 | ENSG00000198712 | -0,227134647 | 13,0560767  | 0,7857252 | 0,384494679 |
| 8007 | ENSG00000198718 | -0,064547803 | 5,707289182 | 0,2090524 | 0,651770729 |
| 8008 | ENSG00000198721 | -0,355169337 | 5,932728713 | 3,2873547 | 0,082823973 |
| 8009 | ENSG00000198722 | 0,069900407  | 6,138661894 | 0,3395556 | 0,565708547 |
| 8010 | ENSG00000198727 | -0,152911698 | 12,87312221 | 0,2816267 | 0,600681974 |
| 8011 | ENSG00000198728 | 0,560655433  | 5,015802099 | 4,6550928 | 0,041592094 |
| 8012 | ENSG00000198729 | -0,41029089  | 6,171352958 | 3,6025294 | 0,070250363 |
| 8013 | ENSG00000198730 | 0,171473166  | 5,469397583 | 2,6185802 | 0,119138887 |
| 8014 | ENSG00000198734 | -0,716028733 | 5,211480184 | 2,3844643 | 0,136129611 |
| 8015 | ENSG00000198739 | -0,361394761 | 4,532700126 | 1,3775877 | 0,252465657 |
| 8016 | ENSG00000198740 | 0,154793057  | 5,236149553 | 1,0073933 | 0,325921019 |
| 8017 | ENSG00000198742 | 0,097679648  | 4,409777555 | 0,3358729 | 0,56782781  |
| 8018 | ENSG00000198743 | -0,301095765 | 6,147917538 | 0,618429  | 0,439620627 |
| 8019 | ENSG00000198744 | -0,171561884 | 9,396958603 | 0,6487835 | 0,428728704 |
| 8020 | ENSG00000198752 | 0,275406082  | 5,946052431 | 1,3671695 | 0,254216509 |
| 8021 | ENSG00000198755 | 0,276912624  | 7,999940658 | 1,2068503 | 0,283269267 |
| 8022 | ENSG00000198756 | 0,6063831    | 4,072177021 | 4,8428216 | 0,038017674 |

|      |                 |              |             |           |             |
|------|-----------------|--------------|-------------|-----------|-------------|
| 8023 | ENSG00000198763 | 0,063112682  | 12,66781638 | 0,0647498 | 0,801382842 |
| 8024 | ENSG00000198771 | -0,222736696 | 5,458211358 | 2,813534  | 0,10689933  |
| 8025 | ENSG00000198780 | -0,245025542 | 3,649010905 | 0,8267997 | 0,372584405 |
| 8026 | ENSG00000198786 | 0,283577952  | 12,30857654 | 0,4062437 | 0,530145949 |
| 8027 | ENSG00000198791 | -0,0885525   | 6,444353715 | 0,2820167 | 0,600448989 |
| 8028 | ENSG00000198792 | -0,000473963 | 4,87981504  | 7,874E-06 | 0,997785194 |
| 8029 | ENSG00000198793 | -0,038369072 | 6,115903996 | 0,0522001 | 0,821287542 |
| 8030 | ENSG00000198795 | 0,013666823  | 5,301065012 | 0,0193028 | 0,999817701 |
| 8031 | ENSG00000198796 | -0,646729452 | 8,10132583  | 3,4665745 | 0,075384591 |
| 8032 | ENSG00000198799 | 0,027352092  | 5,219387286 | 0,037135  | 0,848870732 |
| 8033 | ENSG00000198804 | -0,166186814 | 15,32083584 | 0,3765491 | 0,545427616 |
| 8034 | ENSG00000198812 | -0,942935605 | 5,282632504 | 9,5395913 | 0,005166222 |
| 8035 | ENSG00000198814 | -0,08943058  | 4,180779052 | 0,1483466 | 0,703642109 |
| 8036 | ENSG00000198815 | 0,092901925  | 5,877459834 | 0,7034148 | 0,410199449 |
| 8037 | ENSG00000198818 | -0,050048332 | 4,187194848 | 0,2148806 | 0,779750767 |
| 8038 | ENSG00000198824 | 0,156386068  | 3,600891803 | 0,547381  | 0,46683884  |
| 8039 | ENSG00000198825 | 0,366769938  | 4,174948416 | 6,6890243 | 0,017356122 |
| 8040 | ENSG00000198830 | 0,583863145  | 6,645153138 | 11,99619  | 0,002096204 |
| 8041 | ENSG00000198832 | 0,058078739  | 4,939100468 | 0,0989933 | 0,755863778 |
| 8042 | ENSG00000198833 | -0,167535466 | 5,531093794 | 0,9687212 | 0,335190989 |
| 8043 | ENSG00000198836 | -0,241039271 | 7,443805885 | 1,0604526 | 0,313768508 |
| 8044 | ENSG00000198837 | -0,146264323 | 4,706882657 | 0,3907206 | 0,53804387  |
| 8045 | ENSG00000198839 | 0,051940958  | 4,700332469 | 0,0802304 | 0,779506986 |
| 8046 | ENSG00000198840 | -0,414735904 | 11,26947753 | 1,9007749 | 0,18116323  |
| 8047 | ENSG00000198842 | -0,107237724 | 7,134239735 | 0,1243164 | 0,727594334 |
| 8048 | ENSG00000198843 | -0,253336668 | 6,368116031 | 1,3572764 | 0,255893668 |
| 8049 | ENSG00000198848 | 0,381069959  | 5,76541556  | 1,3810208 | 0,251892111 |
| 8050 | ENSG00000198853 | -0,089215974 | 5,08313577  | 0,1803938 | 0,674962792 |
| 8051 | ENSG00000198856 | 0,060905729  | 5,062130492 | 0,0557852 | 0,815366622 |
| 8052 | ENSG00000198860 | -0,303986409 | 4,6042545   | 3,6267436 | 0,069378516 |
| 8053 | ENSG00000198862 | -0,306068611 | 6,534794443 | 1,6137631 | 0,216603114 |
| 8054 | ENSG00000198863 | -0,023805114 | 3,811878602 | 0,0274653 | 0,869809621 |
| 8055 | ENSG00000198873 | 0,041321036  | 5,256657866 | 0,0351656 | 0,852885641 |
| 8056 | ENSG00000198874 | -0,246047417 | 4,590576053 | 4,4452471 | 0,053357782 |
| 8057 | ENSG00000198876 | 0,468389756  | 4,765141558 | 4,6532898 | 0,041628207 |
| 8058 | ENSG00000198879 | 0,137368123  | 4,907710035 | 1,0544737 | 0,315069776 |
| 8059 | ENSG00000198886 | 0,034877057  | 13,55370708 | 0,0178211 | 0,894953018 |
| 8060 | ENSG00000198887 | 0,033932767  | 6,054506093 | 0,0412452 | 0,840842642 |
| 8061 | ENSG00000198888 | -0,080995205 | 12,41296355 | 0,0810731 | 0,778375267 |
| 8062 | ENSG00000198892 | -0,514382199 | 4,499898795 | 5,0101783 | 0,035120058 |
| 8063 | ENSG00000198894 | -0,18348704  | 6,003210843 | 1,040604  | 0,318240594 |
| 8064 | ENSG00000198898 | -0,508856947 | 8,040086102 | 2,3239525 | 0,14096342  |
| 8065 | ENSG00000198899 | -0,076072251 | 12,87623577 | 0,1099512 | 0,743177227 |
| 8066 | ENSG00000198900 | 0,009896419  | 5,454153127 | 0,0043596 | 0,947924212 |
| 8067 | ENSG00000198909 | 0,308220958  | 5,42668908  | 2,902896  | 0,101830625 |
| 8068 | ENSG00000198911 | 0,392501331  | 5,955613447 | 2,4643758 | 0,13004422  |
| 8069 | ENSG00000198918 | 0,201028413  | 8,096506445 | 0,9240912 | 0,346352755 |
| 8070 | ENSG00000198919 | -0,10772247  | 5,865512345 | 0,3320175 | 0,570042589 |
| 8071 | ENSG00000198920 | 0,340753088  | 3,727020211 | 5,2735363 | 0,071687281 |
| 8072 | ENSG00000198924 | -0,135468451 | 4,010932512 | 0,7038826 | 0,447511307 |
| 8073 | ENSG00000198925 | -0,083873609 | 4,526143561 | 0,1651086 | 0,688233862 |
| 8074 | ENSG00000198932 | 0,438911839  | 5,810836193 | 7,0505792 | 0,014105426 |
| 8075 | ENSG00000198938 | -0,201030073 | 13,64581542 | 0,7713574 | 0,388805261 |
| 8076 | ENSG00000198947 | -0,20432548  | 9,59989218  | 0,6240038 | 0,437593178 |
| 8077 | ENSG00000198951 | -0,259598656 | 4,266450773 | 2,1518178 | 0,155876928 |
| 8078 | ENSG00000198952 | -0,018033948 | 6,262337092 | 0,0084248 | 0,927658504 |
| 8079 | ENSG00000198954 | -0,132726107 | 5,275186119 | 0,952806  | 0,339081262 |
| 8080 | ENSG00000198959 | -0,047245923 | 8,564924146 | 0,0412105 | 0,840908608 |
| 8081 | ENSG00000198960 | 0,173705923  | 4,21768339  | 1,3312844 | 0,26895195  |

|      |                 |              |             |           |             |
|------|-----------------|--------------|-------------|-----------|-------------|
| 8082 | ENSG00000198961 | -0,120853088 | 7,904709329 | 0,3544502 | 0,557389714 |
| 8083 | ENSG00000198964 | 0,024021224  | 5,339528613 | 0,0302701 | 0,863389679 |
| 8084 | ENSG00000199415 | 0,610654314  | 5,339241168 | 1,2572348 | 0,273690127 |
| 8085 | ENSG00000199480 | 0,613167012  | 5,346319415 | 1,2927619 | 0,267190498 |
| 8086 | ENSG00000199523 | 0,632254537  | 5,366571142 | 1,3634948 | 0,254837818 |
| 8087 | ENSG00000199568 | 1,382870751  | 6,957849771 | 3,6809773 | 0,067470273 |
| 8088 | ENSG00000199677 | 0,622500081  | 3,448134474 | 2,5046156 | 0,127102047 |
| 8089 | ENSG00000199994 | 0,424618288  | 4,631684406 | 0,7399571 | 0,398509875 |
| 8090 | ENSG00000200087 | 0,634243509  | 7,464444254 | 2,560237  | 0,123163618 |
| 8091 | ENSG00000200156 | 0,589262885  | 5,649855545 | 1,3934667 | 0,249826886 |
| 8092 | ENSG00000200312 | 0,969200471  | 8,755105205 | 2,0517153 | 0,165421671 |
| 8093 | ENSG00000200314 | 0,765493531  | 6,711392028 | 2,3784536 | 0,136600845 |
| 8094 | ENSG00000200488 | 0,812473586  | 10,39141546 | 1,890689  | 0,182307863 |
| 8095 | ENSG00000200494 | 0,872978858  | 9,358473198 | 2,6167178 | 0,119310628 |
| 8096 | ENSG00000200558 | 0,087700173  | 3,861243444 | 0,0439242 | 0,83583104  |
| 8097 | ENSG00000200795 | -0,080527448 | 6,175118506 | 0,0302613 | 0,863413257 |
| 8098 | ENSG00000200959 | 1,134846218  | 5,25972417  | 3,5451964 | 0,072365079 |
| 8099 | ENSG00000201098 | 0,910949263  | 8,364221835 | 2,2383309 | 0,148157314 |
| 8100 | ENSG00000201185 | 0,696323314  | 5,776488178 | 2,0807328 | 0,162583998 |
| 8101 | ENSG00000201428 | 0,478290002  | 10,75839423 | 0,8690795 | 0,360847016 |
| 8102 | ENSG00000201654 | 0,423837338  | 3,646831305 | 1,7187222 | 0,202734293 |
| 8103 | ENSG00000201955 | 0,878773766  | 9,32634905  | 2,7023987 | 0,113732674 |
| 8104 | ENSG00000201998 | 0,6882391    | 5,0165848   | 2,033899  | 0,167193661 |
| 8105 | ENSG00000202058 | 0,269146769  | 10,1100878  | 0,4906528 | 0,490628026 |
| 8106 | ENSG00000202354 | 0,866729351  | 9,406009329 | 2,5416647 | 0,124462458 |
| 8107 | ENSG00000202512 | 0,283316574  | 5,39335216  | 0,6196417 | 0,439178327 |
| 8108 | ENSG00000202538 | 0,447940548  | 9,573759418 | 0,6073584 | 0,44369129  |
| 8109 | ENSG00000203326 | 0,202335932  | 3,975238779 | 0,9344711 | 0,34371074  |
| 8110 | ENSG00000203485 | 0,35105141   | 4,722849141 | 2,5146072 | 0,126383741 |
| 8111 | ENSG00000203506 | -0,015713253 | 3,55939303  | 0,0067876 | 0,938800279 |
| 8112 | ENSG00000203666 | -0,366844719 | 4,428624707 | 2,2505508 | 0,147104221 |
| 8113 | ENSG00000203668 | -0,108505492 | 4,489469004 | 0,3167846 | 0,578965654 |
| 8114 | ENSG00000203705 | -0,197507916 | 4,497252631 | 0,8417013 | 0,368385436 |
| 8115 | ENSG00000203709 | -0,227306978 | 6,418695856 | 0,527179  | 0,475084271 |
| 8116 | ENSG00000203710 | -1,586686306 | 4,723649134 | 15,300933 | 0,000695409 |
| 8117 | ENSG00000203747 | -0,193046934 | 4,919690161 | 0,3739203 | 0,546843156 |
| 8118 | ENSG00000203778 | -0,331953893 | 4,912183951 | 3,2043802 | 0,086551993 |
| 8119 | ENSG00000203791 | 0,034123912  | 3,768313176 | 0,0583316 | 0,838662147 |
| 8120 | ENSG00000203797 | -0,383593213 | 3,928399534 | 2,7251077 | 0,11230593  |
| 8121 | ENSG00000203867 | 0,138926226  | 7,006845632 | 0,1739828 | 0,680445009 |
| 8122 | ENSG00000203875 | 0,095004317  | 5,626691883 | 0,2938215 | 0,592970056 |
| 8123 | ENSG00000203879 | -0,020360312 | 5,894616705 | 0,0149646 | 0,903695184 |
| 8124 | ENSG00000203880 | 0,069872896  | 6,474258335 | 0,2686384 | 0,60915608  |
| 8125 | ENSG00000203930 | 0,226805953  | 6,123592823 | 0,1413077 | 0,710412657 |
| 8126 | ENSG00000203965 | 0,075273477  | 4,148881265 | 0,1207423 | 0,731375173 |
| 8127 | ENSG00000204054 | 0,25266085   | 4,572261835 | 1,38217   | 0,2517005   |
| 8128 | ENSG00000204070 | 0,07940411   | 4,571674398 | 0,2951634 | 0,635887298 |
| 8129 | ENSG00000204084 | -0,006479204 | 4,640201405 | 0,0016048 | 0,968389684 |
| 8130 | ENSG00000204103 | -0,230878044 | 4,262394443 | 0,6956667 | 0,412781205 |
| 8131 | ENSG00000204104 | 0,300221172  | 3,800617562 | 6,1150713 | 0,096147627 |
| 8132 | ENSG00000204116 | -0,256048688 | 5,306641687 | 1,4603915 | 0,239086863 |
| 8133 | ENSG00000204120 | 0,051744446  | 6,527311009 | 0,3350718 | 0,568267166 |
| 8134 | ENSG00000204130 | 0,102248803  | 4,847680059 | 0,4943233 | 0,489023192 |
| 8135 | ENSG00000204131 | 0,140321749  | 4,590706166 | 0,3787912 | 0,544264137 |
| 8136 | ENSG00000204136 | 0,461855118  | 4,427879455 | 4,1671093 | 0,052793368 |
| 8137 | ENSG00000204138 | 0,069404861  | 4,61993653  | 0,2061212 | 0,654059321 |
| 8138 | ENSG00000204147 | -0,252875665 | 3,788358579 | 1,0890311 | 0,307478687 |
| 8139 | ENSG00000204161 | -0,545133439 | 4,312779835 | 14,752006 | 0,000825588 |
| 8140 | ENSG00000204177 | -0,062963093 | 4,58457929  | 0,1569608 | 0,695604048 |

|      |                 |              |             |           |             |
|------|-----------------|--------------|-------------|-----------|-------------|
| 8141 | ENSG00000204178 | 0,058756194  | 4,716281623 | 0,2763863 | 0,626815177 |
| 8142 | ENSG00000204179 | -0,132115712 | 4,301422693 | 0,1960918 | 0,662010869 |
| 8143 | ENSG00000204186 | 0,224849191  | 5,491581114 | 1,8390545 | 0,188163463 |
| 8144 | ENSG00000204209 | 0,258805105  | 3,981885749 | 1,8501096 | 0,186890575 |
| 8145 | ENSG00000204217 | 0,107277172  | 7,53024341  | 0,6289277 | 0,435786804 |
| 8146 | ENSG00000204219 | -0,087107736 | 5,182439197 | 0,27656   | 0,603974591 |
| 8147 | ENSG00000204231 | 0,323234615  | 4,751172348 | 4,1450774 | 0,05337426  |
| 8148 | ENSG00000204253 | -0,008177288 | 4,504311392 | 0,0027914 | 0,958318458 |
| 8149 | ENSG00000204256 | 0,134938541  | 6,388701794 | 0,7647444 | 0,390844477 |
| 8150 | ENSG00000204257 | 0,405101015  | 4,508081685 | 3,2466933 | 0,084627247 |
| 8151 | ENSG00000204262 | 0,512480444  | 6,068019198 | 3,3526864 | 0,080018398 |
| 8152 | ENSG00000204264 | 0,171609406  | 4,140551172 | 0,4355606 | 0,515796454 |
| 8153 | ENSG00000204271 | 0,045651955  | 3,757573932 | 0,1219649 | 0,811614426 |
| 8154 | ENSG00000204287 | 0,756514741  | 7,548839536 | 5,9718446 | 0,022581307 |
| 8155 | ENSG00000204291 | 0,58840184   | 6,82660992  | 3,5611356 | 0,071769944 |
| 8156 | ENSG00000204301 | 0,226513322  | 4,829096856 | 0,8404081 | 0,368747096 |
| 8157 | ENSG00000204304 | 0,18581479   | 4,789973188 | 1,0567479 | 0,314596653 |
| 8158 | ENSG00000204308 | -0,408937516 | 4,916029567 | 8,8798451 | 0,006660364 |
| 8159 | ENSG00000204351 | -0,004564503 | 4,463689355 | 0,0006009 | 0,9806532   |
| 8160 | ENSG00000204356 | 0,062632656  | 4,8390733   | 0,2073129 | 0,685242149 |
| 8161 | ENSG00000204370 | -0,422607349 | 6,807373589 | 2,4235346 | 0,13311312  |
| 8162 | ENSG00000204386 | 0,08677754   | 4,522687174 | 0,5119375 | 0,611652974 |
| 8163 | ENSG00000204388 | -0,085682048 | 6,228218621 | 0,0612121 | 0,806774927 |
| 8164 | ENSG00000204389 | -0,119821713 | 7,512694681 | 0,0981    | 0,75693062  |
| 8165 | ENSG00000204394 | 0,025382588  | 4,201070472 | 0,0134185 | 0,908781416 |
| 8166 | ENSG00000204406 | 0,01065925   | 5,535121142 | 0,0095868 | 0,922843072 |
| 8167 | ENSG00000204439 | -0,019978385 | 3,779487942 | 0,0110471 | 0,917199211 |
| 8168 | ENSG00000204463 | 0,030063685  | 6,332382563 | 0,0227852 | 0,881326628 |
| 8169 | ENSG00000204469 | 0,167980398  | 6,174631597 | 0,3909635 | 0,537918581 |
| 8170 | ENSG00000204472 | 0,124957262  | 4,176298741 | 0,2577412 | 0,616486862 |
| 8171 | ENSG00000204514 | 0,025249137  | 4,662473568 | 0,0158388 | 0,900937128 |
| 8172 | ENSG00000204519 | 0,092869077  | 3,727263633 | 0,4144677 | 0,64381706  |
| 8173 | ENSG00000204524 | 0,203238675  | 4,91316953  | 3,1541916 | 0,088854769 |
| 8174 | ENSG00000204525 | 0,328890647  | 7,28731107  | 3,0191849 | 0,095593795 |
| 8175 | ENSG00000204560 | 0,153216946  | 4,47320273  | 0,998195  | 0,353047555 |
| 8176 | ENSG00000204568 | -0,334443314 | 5,731550672 | 6,8156482 | 0,015570611 |
| 8177 | ENSG00000204569 | 0,51244276   | 4,864708811 | 4,6527524 | 0,041638978 |
| 8178 | ENSG00000204574 | -0,019754443 | 5,328930123 | 0,0161567 | 0,899953633 |
| 8179 | ENSG00000204580 | 0,634059072  | 4,978692339 | 9,3450007 | 0,00556833  |
| 8180 | ENSG00000204590 | 0,26626275   | 4,772177022 | 2,5156797 | 0,126306922 |
| 8181 | ENSG00000204592 | 0,428171817  | 8,124190508 | 7,0414482 | 0,01413625  |
| 8182 | ENSG00000204604 | 0,037943112  | 3,568880156 | 0,0970819 | 0,828504777 |
| 8183 | ENSG00000204611 | 0,275740318  | 3,592125652 | 3,7398846 | 0,142560407 |
| 8184 | ENSG00000204619 | -0,296880974 | 4,736850522 | 4,5156496 | 0,044456802 |
| 8185 | ENSG00000204623 | 0,045132207  | 3,927899001 | 0,0452031 | 0,8334949   |
| 8186 | ENSG00000204628 | 0,131594892  | 8,551556965 | 0,321272  | 0,576307889 |
| 8187 | ENSG00000204634 | 0,288632988  | 5,778504994 | 1,8993656 | 0,18134593  |
| 8188 | ENSG00000204642 | 0,379781231  | 4,305106212 | 5,8763789 | 0,023569932 |
| 8189 | ENSG00000204650 | -0,235703174 | 3,72204687  | 1,268444  | 0,271617252 |
| 8190 | ENSG00000204652 | -0,092362721 | 4,694201128 | 0,0816252 | 0,777651877 |
| 8191 | ENSG00000204681 | 0,213784711  | 4,85465051  | 0,9284168 | 0,345248279 |
| 8192 | ENSG00000204713 | 0,283661287  | 4,915290229 | 6,0096156 | 0,02244406  |
| 8193 | ENSG00000204745 | 0,048143415  | 4,091753087 | 0,1951931 | 0,783382224 |
| 8194 | ENSG00000204764 | 0,46486591   | 3,909350702 | 4,4152617 | 0,046721373 |
| 8195 | ENSG00000204778 | -0,323124121 | 4,270465018 | 1,9902446 | 0,171633661 |
| 8196 | ENSG00000204789 | -0,295457755 | 4,322159556 | 1,548581  | 0,225816891 |
| 8197 | ENSG00000204842 | 0,078448948  | 5,489239768 | 0,2137494 | 0,648167187 |
| 8198 | ENSG00000204843 | 0,163867203  | 6,401973718 | 0,8081792 | 0,377929835 |
| 8199 | ENSG00000204852 | 0,043759449  | 4,655030635 | 0,1402954 | 0,72446039  |

|      |                 |              |             |           |             |
|------|-----------------|--------------|-------------|-----------|-------------|
| 8200 | ENSG00000204899 | -0,040785486 | 3,817839707 | 0,0296145 | 0,86486581  |
| 8201 | ENSG00000204977 | -0,141377686 | 5,362361046 | 1,1367101 | 0,297321513 |
| 8202 | ENSG00000205038 | 2,720434004  | 7,833211303 | 4,7953025 | 0,038888651 |
| 8203 | ENSG00000205060 | 0,072533459  | 4,020749387 | 0,2094127 | 0,651500933 |
| 8204 | ENSG00000205133 | 0,161828081  | 5,281045173 | 0,4141964 | 0,526182141 |
| 8205 | ENSG00000205189 | 0,007019581  | 6,146825526 | 0,0017666 | 0,966834665 |
| 8206 | ENSG00000205213 | -0,106228374 | 5,94562469  | 0,4980584 | 0,487407372 |
| 8207 | ENSG00000205221 | -1,212992872 | 4,188207333 | 10,844821 | 0,003168109 |
| 8208 | ENSG00000205250 | -0,122682379 | 4,649793522 | 0,6660581 | 0,42274942  |
| 8209 | ENSG00000205268 | -0,482821859 | 6,630393503 | 2,6416352 | 0,117655995 |
| 8210 | ENSG00000205269 | 0,09168248   | 4,744933194 | 0,1923328 | 0,665054087 |
| 8211 | ENSG00000205302 | -0,075574512 | 5,868159394 | 0,1678298 | 0,685819882 |
| 8212 | ENSG00000205339 | 0,045763954  | 7,583379711 | 0,0691429 | 0,794918703 |
| 8213 | ENSG00000205352 | -0,125653828 | 4,217484838 | 0,5276322 | 0,474896649 |
| 8214 | ENSG00000205363 | -0,949847841 | 4,724812855 | 9,1703069 | 0,005958761 |
| 8215 | ENSG00000205413 | 0,366816669  | 4,964674122 | 1,6652089 | 0,209662176 |
| 8216 | ENSG00000205423 | -0,223910517 | 4,014736686 | 2,2835283 | 0,196902476 |
| 8217 | ENSG00000205476 | -0,257640136 | 3,904569834 | 1,5580687 | 0,22444548  |
| 8218 | ENSG00000205531 | -0,009983042 | 6,708982527 | 0,0083677 | 0,927900422 |
| 8219 | ENSG00000205534 | -0,195004704 | 6,485460829 | 0,948082  | 0,340289068 |
| 8220 | ENSG00000205542 | 0,528370054  | 9,229532722 | 3,1194764 | 0,090568557 |
| 8221 | ENSG00000205571 | 0,252703786  | 4,855391698 | 1,8681821 | 0,184832373 |
| 8222 | ENSG00000205572 | 0,275153098  | 4,055248212 | 3,2294876 | 0,114168993 |
| 8223 | ENSG00000205581 | 0,358232296  | 6,07338677  | 6,9805393 | 0,014508192 |
| 8224 | ENSG00000205583 | 0,025409612  | 4,083888957 | 0,0115772 | 0,91524361  |
| 8225 | ENSG00000205609 | 0,207407285  | 7,562359343 | 1,1420822 | 0,296247677 |
| 8226 | ENSG00000205629 | 0,024442075  | 4,296695031 | 0,0292016 | 0,947499022 |
| 8227 | ENSG00000205659 | -0,037977955 | 3,706226486 | 0,0925266 | 0,84463184  |
| 8228 | ENSG00000205670 | -0,200435963 | 4,325376683 | 2,6879344 | 0,176625299 |
| 8229 | ENSG00000205678 | -0,700243306 | 9,889195927 | 2,4755951 | 0,129215888 |
| 8230 | ENSG00000205683 | -0,242610978 | 4,577165092 | 0,6060407 | 0,444179785 |
| 8231 | ENSG00000205707 | -0,558556236 | 5,184105527 | 3,7028097 | 0,066719058 |
| 8232 | ENSG00000205726 | 0,088766786  | 6,50895541  | 0,1978541 | 0,660596206 |
| 8233 | ENSG00000205730 | 0,45711668   | 5,245357563 | 5,8526736 | 0,023822825 |
| 8234 | ENSG00000205758 | -0,171670884 | 4,695086448 | 1,9474812 | 0,232181919 |
| 8235 | ENSG00000205765 | -0,074565135 | 5,147280501 | 0,2205214 | 0,643043084 |
| 8236 | ENSG00000205871 | 0,374887593  | 4,984810582 | 2,4080162 | 0,134301653 |
| 8237 | ENSG00000205937 | -0,040639903 | 5,517318622 | 0,0717841 | 0,791133232 |
| 8238 | ENSG00000205978 | 0,597409951  | 4,071897553 | 5,513109  | 0,027798084 |
| 8239 | ENSG00000205981 | -0,509660816 | 5,371488255 | 5,9710517 | 0,022589325 |
| 8240 | ENSG00000206052 | -0,07447348  | 4,267914917 | 0,2630151 | 0,612914167 |
| 8241 | ENSG00000206053 | 0,136690565  | 4,690916677 | 0,9284378 | 0,345214837 |
| 8242 | ENSG00000206077 | -0,282697292 | 4,049700211 | 1,1640471 | 0,291759027 |
| 8243 | ENSG00000206127 | 0,18727566   | 5,161040364 | 1,0796506 | 0,309524183 |
| 8244 | ENSG00000206149 | -0,418268009 | 6,695623199 | 2,6695358 | 0,115835144 |
| 8245 | ENSG00000206172 | 2,104189646  | 5,921295489 | 14,597692 | 0,00087132  |
| 8246 | ENSG00000206337 | 0,346851995  | 4,020981082 | 3,350579  | 0,080107171 |
| 8247 | ENSG00000206341 | 0,423554696  | 5,037286796 | 2,9668334 | 0,098344946 |
| 8248 | ENSG00000206384 | 0,381363632  | 4,965645063 | 0,9265845 | 0,345715524 |
| 8249 | ENSG00000206418 | -0,281776674 | 5,946178395 | 2,8258833 | 0,106221742 |
| 8250 | ENSG00000206503 | 0,430385229  | 7,573744771 | 7,1191326 | 0,013688852 |
| 8251 | ENSG00000206527 | 0,492564894  | 5,587701426 | 1,9763203 | 0,173079909 |
| 8252 | ENSG00000206530 | 0,173529688  | 3,608969735 | 1,2581371 | 0,384490695 |
| 8253 | ENSG00000206538 | 0,614795412  | 5,563087572 | 1,7880334 | 0,194178142 |
| 8254 | ENSG00000206560 | 0,02924502   | 5,473569754 | 0,0354627 | 0,852273117 |
| 8255 | ENSG00000206561 | 0,878572993  | 4,246915208 | 6,9735325 | 0,01457609  |
| 8256 | ENSG00000206573 | -0,119145477 | 4,83570313  | 0,7166944 | 0,405894694 |
| 8257 | ENSG00000206585 | 0,718550773  | 12,4766925  | 1,3953028 | 0,249524063 |
| 8258 | ENSG00000206588 | 0,554738964  | 7,896571509 | 0,884328  | 0,356744161 |

|      |                 |              |             |           |             |
|------|-----------------|--------------|-------------|-----------|-------------|
| 8259 | ENSG00000206596 | 0,628251668  | 9,812339614 | 1,172987  | 0,289958131 |
| 8260 | ENSG00000206625 | 0,575964963  | 3,890616107 | 2,7900633 | 0,108339138 |
| 8261 | ENSG00000206651 | 0,753989274  | 4,405610116 | 1,7956789 | 0,193261921 |
| 8262 | ENSG00000206652 | 0,712408269  | 12,50201105 | 1,3740304 | 0,253061731 |
| 8263 | ENSG00000206737 | 0,50234788   | 8,438606149 | 0,7431926 | 0,397496626 |
| 8264 | ENSG00000206899 | 0,408526409  | 4,036216353 | 1,4475572 | 0,241099981 |
| 8265 | ENSG00000206932 | 0,415302852  | 3,683940257 | 1,54807   | 0,225891067 |
| 8266 | ENSG00000206965 | 0,529669755  | 3,910642244 | 2,3766716 | 0,136740927 |
| 8267 | ENSG00000207005 | 0,650638657  | 9,910460984 | 1,2441823 | 0,276130154 |
| 8268 | ENSG00000207008 | 0,290824787  | 5,579700465 | 0,5638516 | 0,460289888 |
| 8269 | ENSG00000207041 | 0,480382308  | 3,971939254 | 2,1416779 | 0,156812993 |
| 8270 | ENSG00000207142 | 0,868717626  | 9,407425013 | 2,5829896 | 0,121594126 |
| 8271 | ENSG00000207357 | 0,436790949  | 3,993194821 | 1,642805  | 0,212650129 |
| 8272 | ENSG00000207389 | 0,623804504  | 10,21455256 | 1,1739365 | 0,289767732 |
| 8273 | ENSG00000207445 | 0,848634632  | 4,32970471  | 2,8658377 | 0,10391667  |
| 8274 | ENSG00000207507 | 0,415169448  | 3,713111633 | 1,763903  | 0,1971053   |
| 8275 | ENSG00000207513 | 0,760870736  | 12,05780372 | 1,4701649 | 0,237568242 |
| 8276 | ENSG00000207524 | 0,494034846  | 3,844202401 | 2,181249  | 0,153197768 |
| 8277 | ENSG00000208772 | 0,608389722  | 5,236961085 | 1,2984088 | 0,266176079 |
| 8278 | ENSG00000208892 | 0,002415664  | 4,050020417 | 6,766E-05 | 0,993507432 |
| 8279 | ENSG00000210082 | 0,48059829   | 13,83595048 | 1,3795785 | 0,25213286  |
| 8280 | ENSG00000210127 | 0,133925272  | 4,500348431 | 0,0908806 | 0,765756281 |
| 8281 | ENSG00000210135 | 0,12738753   | 7,687410743 | 0,1090962 | 0,744150696 |
| 8282 | ENSG00000210140 | -0,007823776 | 9,274053695 | 0,0004632 | 0,983013755 |
| 8283 | ENSG00000210144 | -0,286838949 | 6,056908916 | 0,607757  | 0,443543657 |
| 8284 | ENSG00000210196 | -0,50892453  | 8,20900013  | 1,4264985 | 0,244450356 |
| 8285 | ENSG00000211445 | -0,446686345 | 9,616564914 | 3,8323777 | 0,062428326 |
| 8286 | ENSG00000211448 | -0,161317485 | 4,007831568 | 0,2535036 | 0,619383838 |
| 8287 | ENSG00000211455 | 0,223338438  | 7,523418361 | 0,435691  | 0,515734215 |
| 8288 | ENSG00000211456 | 0,094533643  | 5,682690988 | 0,3437098 | 0,563377938 |
| 8289 | ENSG00000211459 | 1,036057952  | 12,4300346  | 1,2735119 | 0,270686823 |
| 8290 | ENSG00000211460 | 0,034134748  | 5,643025475 | 0,0901228 | 0,766695342 |
| 8291 | ENSG00000211584 | -0,225477229 | 4,277728213 | 1,1502558 | 0,294566634 |
| 8292 | ENSG00000212232 | 1,471946569  | 9,12053437  | 4,1340678 | 0,053667251 |
| 8293 | ENSG00000212402 | 2,979885327  | 6,337745809 | 5,1262541 | 0,033255832 |
| 8294 | ENSG00000212443 | 1,032772313  | 7,899954237 | 2,5700537 | 0,122483548 |
| 8295 | ENSG00000212464 | 0,462967678  | 4,71128022  | 1,2308279 | 0,278656366 |
| 8296 | ENSG00000212664 | 0,027973791  | 6,208591557 | 0,0114222 | 0,915810572 |
| 8297 | ENSG00000212719 | -0,024687368 | 4,100391883 | 0,0196386 | 0,889765122 |
| 8298 | ENSG00000212802 | 0,391050971  | 6,647230769 | 3,7530946 | 0,065024853 |
| 8299 | ENSG00000212907 | 0,019910133  | 10,04651843 | 0,0023153 | 0,962036113 |
| 8300 | ENSG00000212994 | -0,166157104 | 4,763131239 | 0,2607495 | 0,614448549 |
| 8301 | ENSG00000213020 | 0,048932212  | 3,947051521 | 0,2336001 | 0,788300083 |
| 8302 | ENSG00000213024 | -0,004908062 | 4,042091778 | 0,0009344 | 0,975876796 |
| 8303 | ENSG00000213047 | 0,032087565  | 5,885197746 | 0,0194393 | 0,890322197 |
| 8304 | ENSG00000213064 | 0,181150907  | 5,97529465  | 0,9633343 | 0,336511248 |
| 8305 | ENSG00000213066 | 0,151473579  | 3,59546902  | 1,5194471 | 0,44000237  |
| 8306 | ENSG00000213079 | 0,052957996  | 6,238199387 | 0,1812083 | 0,674260915 |
| 8307 | ENSG00000213088 | -0,995439828 | 4,926264928 | 6,5570802 | 0,01744114  |
| 8308 | ENSG00000213096 | -0,086288638 | 5,417866356 | 0,2449312 | 0,625339003 |
| 8309 | ENSG00000213160 | -0,580581287 | 4,704649074 | 7,9066305 | 0,009868218 |
| 8310 | ENSG00000213178 | 0,132239832  | 5,934455287 | 0,4545761 | 0,506857759 |
| 8311 | ENSG00000213190 | -0,277668279 | 4,026224449 | 0,769071  | 0,389529039 |
| 8312 | ENSG00000213281 | 0,000466258  | 4,910167409 | 9,39E-06  | 0,997581269 |
| 8313 | ENSG00000213300 | -0,022031754 | 3,831666257 | 0,0185122 | 0,892952314 |
| 8314 | ENSG00000213326 | -0,015790066 | 4,650231432 | 0,0052085 | 0,94308739  |
| 8315 | ENSG00000213341 | -0,135845774 | 4,868465078 | 0,85304   | 0,365236116 |
| 8316 | ENSG00000213366 | -0,208479928 | 4,443977317 | 1,0320033 | 0,320205552 |
| 8317 | ENSG00000213430 | -0,160523332 | 3,995532329 | 1,2886448 | 0,372415647 |

|      |                 |              |             |           |             |
|------|-----------------|--------------|-------------|-----------|-------------|
| 8318 | ENSG00000213442 | 0,290106722  | 5,660194557 | 1,7294933 | 0,201374438 |
| 8319 | ENSG00000213462 | 0,087680455  | 4,083770733 | 0,098287  | 0,756706935 |
| 8320 | ENSG00000213463 | -0,087379394 | 6,224422971 | 0,4434525 | 0,512030004 |
| 8321 | ENSG00000213516 | 0,011235733  | 4,782170294 | 0,0116488 | 0,914979927 |
| 8322 | ENSG00000213523 | 0,108671376  | 4,539369445 | 0,8113973 | 0,461935993 |
| 8323 | ENSG00000213553 | 0,049986814  | 6,584246961 | 0,0366556 | 0,849839895 |
| 8324 | ENSG00000213585 | -0,352940651 | 8,236192727 | 2,8690523 | 0,103733756 |
| 8325 | ENSG00000213593 | -0,407883814 | 5,690136318 | 14,046772 | 0,001038427 |
| 8326 | ENSG00000213614 | -0,028999373 | 4,755098583 | 0,0616425 | 0,806103518 |
| 8327 | ENSG00000213619 | -0,425934854 | 5,864691418 | 6,6720791 | 0,016592148 |
| 8328 | ENSG00000213621 | -0,004296227 | 4,671999946 | 0,0004252 | 0,983726139 |
| 8329 | ENSG00000213625 | -0,002413745 | 6,457624691 | 0,0003432 | 0,985378862 |
| 8330 | ENSG00000213626 | 1,066339184  | 5,311741623 | 21,005577 | 0,000130133 |
| 8331 | ENSG00000213639 | -0,044849649 | 8,591990755 | 0,0450113 | 0,833843101 |
| 8332 | ENSG00000213672 | 0,7965399    | 4,350270238 | 6,2100626 | 0,020309547 |
| 8333 | ENSG00000213676 | 0,293017274  | 4,476073363 | 2,4885056 | 0,1282704   |
| 8334 | ENSG00000213694 | -1,282282363 | 4,825867989 | 29,343457 | 1,64155E-05 |
| 8335 | ENSG00000213699 | -0,07360054  | 4,758458199 | 0,1362114 | 0,715436274 |
| 8336 | ENSG00000213707 | -0,013637492 | 4,042654097 | 0,0036234 | 0,952517873 |
| 8337 | ENSG00000213719 | -0,010705462 | 6,369476835 | 0,0029394 | 0,957228609 |
| 8338 | ENSG00000213722 | 0,380833691  | 4,835712584 | 3,6460891 | 0,068690851 |
| 8339 | ENSG00000213741 | 0,239081303  | 7,237477761 | 0,9254174 | 0,346013604 |
| 8340 | ENSG00000213753 | 0,017278663  | 3,909447375 | 0,0173922 | 0,979960215 |
| 8341 | ENSG00000213757 | 0,226449949  | 4,006664416 | 0,7324034 | 0,400890614 |
| 8342 | ENSG00000213762 | 0,039852617  | 4,66263389  | 0,1998411 | 0,788438169 |
| 8343 | ENSG00000213799 | 0,079004347  | 4,196780254 | 0,2276325 | 0,637765265 |
| 8344 | ENSG00000213853 | -0,157453128 | 6,09762403  | 0,78255   | 0,385472721 |
| 8345 | ENSG00000213860 | -0,033907878 | 7,227724307 | 0,0221167 | 0,883067045 |
| 8346 | ENSG00000213866 | -0,106872913 | 4,083689155 | 0,6969011 | 0,503917283 |
| 8347 | ENSG00000213885 | 0,216633863  | 5,081783782 | 0,9773316 | 0,333095606 |
| 8348 | ENSG00000213923 | 0,081875509  | 4,534456986 | 0,2502626 | 0,621620239 |
| 8349 | ENSG00000213930 | -0,00422618  | 3,968583318 | 0,0009366 | 0,975847858 |
| 8350 | ENSG00000213949 | 0,178720728  | 6,860459873 | 0,5731598 | 0,456655024 |
| 8351 | ENSG00000213965 | -0,477993229 | 3,666622761 | 12,586892 | 0,013361607 |
| 8352 | ENSG00000213995 | 0,07394417   | 4,773583252 | 0,3631128 | 0,707129356 |
| 8353 | ENSG00000214013 | -0,142238454 | 4,714770789 | 1,8413827 | 0,240865404 |
| 8354 | ENSG00000214021 | 0,373291007  | 3,81242339  | 2,3330973 | 0,140219972 |
| 8355 | ENSG00000214022 | -0,013270864 | 5,306372549 | 0,0072706 | 0,93278274  |
| 8356 | ENSG00000214029 | 0,153699956  | 3,957709874 | 0,876413  | 0,375591111 |
| 8357 | ENSG00000214046 | 0,054877658  | 4,679982785 | 0,1399727 | 0,711713647 |
| 8358 | ENSG00000214078 | 0,1036933    | 4,593615822 | 0,2709419 | 0,607651495 |
| 8359 | ENSG00000214097 | -0,932759281 | 4,597482182 | 7,0868379 | 0,013889769 |
| 8360 | ENSG00000214106 | 0,205814162  | 3,585912519 | 1,4733478 | 0,298899172 |
| 8361 | ENSG00000214113 | -0,106248574 | 4,080069034 | 0,6958376 | 0,537701644 |
| 8362 | ENSG00000214135 | -0,328982898 | 4,873412102 | 1,9995298 | 0,170677414 |
| 8363 | ENSG00000214174 | -0,000322027 | 4,150132941 | 3,38E-06  | 0,998548837 |
| 8364 | ENSG00000214194 | -0,388319809 | 6,398889533 | 1,542686  | 0,226674339 |
| 8365 | ENSG00000214199 | 0,382974519  | 5,801532673 | 1,6538223 | 0,211174178 |
| 8366 | ENSG00000214223 | 0,387645564  | 5,93863651  | 5,1805932 | 0,032421418 |
| 8367 | ENSG00000214253 | -0,056476538 | 6,037934594 | 0,0708012 | 0,792533021 |
| 8368 | ENSG00000214331 | 0,0252359    | 3,795763247 | 0,0116333 | 0,915039264 |
| 8369 | ENSG00000214357 | -0,244162473 | 5,404675872 | 1,3848243 | 0,251258646 |
| 8370 | ENSG00000214367 | 0,070153099  | 3,970816063 | 0,2683614 | 0,660041239 |
| 8371 | ENSG00000214389 | 0,262232062  | 6,928130789 | 1,0075364 | 0,325887371 |
| 8372 | ENSG00000214391 | -0,186407854 | 4,136690587 | 1,2661366 | 0,272042268 |
| 8373 | ENSG00000214413 | -0,14654678  | 4,530624731 | 1,4234627 | 0,302820087 |
| 8374 | ENSG00000214425 | 0,316834075  | 5,507525373 | 0,9980463 | 0,328128662 |
| 8375 | ENSG00000214456 | -0,19641083  | 4,597641784 | 0,5529127 | 0,464622353 |
| 8376 | ENSG00000214485 | -0,006531904 | 7,549848153 | 0,0004817 | 0,982678957 |

|      |                 |              |             |           |             |
|------|-----------------|--------------|-------------|-----------|-------------|
| 8377 | ENSG00000214517 | -0,005147041 | 4,653917325 | 0,002301  | 0,962151662 |
| 8378 | ENSG00000214544 | 0,039142762  | 4,539848881 | 0,0641823 | 0,953383067 |
| 8379 | ENSG00000214548 | -0,477062692 | 6,00181615  | 3,7245978 | 0,065978866 |
| 8380 | ENSG00000214652 | 0,415566862  | 4,156647487 | 2,4233705 | 0,133125619 |
| 8381 | ENSG00000214655 | 0,233816424  | 4,660494031 | 1,1811584 | 0,288325001 |
| 8382 | ENSG00000214717 | 0,061902895  | 5,193595427 | 0,1047509 | 0,749111598 |
| 8383 | ENSG00000214753 | 0,035804234  | 4,711599641 | 0,0554257 | 0,815951096 |
| 8384 | ENSG00000214765 | -0,063042486 | 4,104519304 | 0,2366562 | 0,685814569 |
| 8385 | ENSG00000214784 | 0,300478777  | 5,603668991 | 1,4880678 | 0,234818167 |
| 8386 | ENSG00000214810 | -0,853929185 | 4,237398167 | 4,6508691 | 0,041676751 |
| 8387 | ENSG00000214941 | 0,05544413   | 3,949497469 | 0,2137964 | 0,75807951  |
| 8388 | ENSG00000214960 | 0,161639128  | 4,196745271 | 0,4559771 | 0,506210041 |
| 8389 | ENSG00000214967 | -0,120556103 | 4,520716216 | 0,3371289 | 0,56710998  |
| 8390 | ENSG00000214975 | -0,092094455 | 5,198388536 | 0,2716891 | 0,607159717 |
| 8391 | ENSG00000215021 | -0,006536572 | 6,196781657 | 0,0025632 | 0,960055121 |
| 8392 | ENSG00000215030 | 0,431628293  | 5,904367547 | 3,80892   | 0,063201143 |
| 8393 | ENSG00000215093 | 0,280471545  | 4,375484186 | 1,2663895 | 0,271995634 |
| 8394 | ENSG00000215105 | 0,30481404   | 4,26615113  | 5,4611711 | 0,041182658 |
| 8395 | ENSG00000215114 | -0,232042936 | 5,150603732 | 2,6024414 | 0,120253497 |
| 8396 | ENSG00000215126 | -0,349450467 | 5,581111864 | 7,8368925 | 0,010134425 |
| 8397 | ENSG00000215158 | 0,130139677  | 4,033815913 | 0,6846886 | 0,452880308 |
| 8398 | ENSG00000215193 | 0,089287791  | 4,791885084 | 0,2722976 | 0,606759779 |
| 8399 | ENSG00000215246 | -0,166846075 | 3,855264223 | 0,2889778 | 0,596014791 |
| 8400 | ENSG00000215251 | -0,464900572 | 4,611931602 | 11,290614 | 0,002686485 |
| 8401 | ENSG00000215252 | 0,134655153  | 6,060689871 | 0,4844192 | 0,493367435 |
| 8402 | ENSG00000215301 | -0,168000342 | 8,154863461 | 0,8527162 | 0,365322487 |
| 8403 | ENSG00000215302 | 0,264247961  | 4,162076395 | 0,7530751 | 0,394425517 |
| 8404 | ENSG00000215305 | 0,013383008  | 3,815232021 | 0,0049933 | 0,996824514 |
| 8405 | ENSG00000215386 | -0,265490134 | 6,807019139 | 3,1150316 | 0,090780528 |
| 8406 | ENSG00000215421 | -0,246835786 | 5,58369691  | 5,9858743 | 0,022409949 |
| 8407 | ENSG00000215492 | 0,366848784  | 6,036302156 | 3,9174203 | 0,059820691 |
| 8408 | ENSG00000215712 | -0,32983908  | 4,550173113 | 6,7618294 | 0,018430415 |
| 8409 | ENSG00000215717 | 0,124390162  | 5,705382879 | 0,6699496 | 0,42142838  |
| 8410 | ENSG00000215790 | 0,123653735  | 4,796929061 | 0,4354468 | 0,515850815 |
| 8411 | ENSG00000215817 | -0,017490945 | 4,232579454 | 0,0178    | 0,913488992 |
| 8412 | ENSG00000215861 | -0,450574855 | 8,54234621  | 2,371146  | 0,137176371 |
| 8413 | ENSG00000216285 | 0,069174393  | 4,822277193 | 0,1744646 | 0,680028865 |
| 8414 | ENSG00000216866 | 0,004819831  | 4,369723743 | 0,0005815 | 0,98096876  |
| 8415 | ENSG00000216937 | 0,35770325   | 5,258439856 | 2,076222  | 0,163021234 |
| 8416 | ENSG00000217128 | 0,080772883  | 6,255112936 | 0,4888365 | 0,491399347 |
| 8417 | ENSG00000217716 | 0,272415334  | 4,695787392 | 2,1758703 | 0,153683248 |
| 8418 | ENSG00000218283 | -0,151136354 | 5,693258477 | 1,0394941 | 0,318489939 |
| 8419 | ENSG00000218336 | 0,489544083  | 4,128427465 | 4,3242924 | 0,048850643 |
| 8420 | ENSG00000218418 | 0,257489166  | 4,14677835  | 2,5649808 | 0,122834427 |
| 8421 | ENSG00000218426 | 0,148644511  | 6,08100961  | 0,854579  | 0,364811656 |
| 8422 | ENSG00000218739 | -0,263691418 | 5,011630524 | 4,1313967 | 0,053697198 |
| 8423 | ENSG00000219023 | 0,262426704  | 4,728950866 | 0,6328921 | 0,434391106 |
| 8424 | ENSG00000219133 | -0,052749082 | 5,430194075 | 0,0623931 | 0,804959487 |
| 8425 | ENSG00000219201 | 0,051638122  | 3,656575058 | 0,1251071 | 0,766634057 |
| 8426 | ENSG00000219481 | 0,367703589  | 6,008123241 | 1,9322315 | 0,177758038 |
| 8427 | ENSG00000219507 | -0,076977623 | 4,065505371 | 0,1045837 | 0,749304758 |
| 8428 | ENSG00000219545 | -0,010028317 | 3,733990891 | 0,0036965 | 0,976714544 |
| 8429 | ENSG00000219626 | -0,002563688 | 3,827571123 | 0,0003179 | 0,994383477 |
| 8430 | ENSG00000220205 | 0,177032266  | 4,83764649  | 0,9351418 | 0,343540982 |
| 8431 | ENSG00000220749 | -0,016043739 | 6,651078863 | 0,0043139 | 0,948197402 |
| 8432 | ENSG00000220793 | -0,037758483 | 7,648698961 | 0,0255874 | 0,874301915 |
| 8433 | ENSG00000220842 | -0,034712702 | 8,343448395 | 0,0204933 | 0,887408679 |
| 8434 | ENSG00000221818 | -0,771882726 | 5,075675356 | 12,885207 | 0,001540258 |
| 8435 | ENSG00000221823 | 0,112155211  | 4,503626359 | 0,629203  | 0,435690306 |



|      |                 |              |             |           |             |
|------|-----------------|--------------|-------------|-----------|-------------|
| 8436 | ENSG00000221866 | 0,756825309  | 5,615890735 | 3,0620649 | 0,093406719 |
| 8437 | ENSG00000221869 | -0,134519027 | 5,638515107 | 0,207649  | 0,652868678 |
| 8438 | ENSG00000221890 | 0,322701857  | 4,447029007 | 1,0370692 | 0,319046162 |
| 8439 | ENSG00000221914 | -0,097059426 | 5,634568037 | 0,6741441 | 0,419970035 |
| 8440 | ENSG00000221923 | 0,113549071  | 4,12541251  | 0,9312902 | 0,42265857  |
| 8441 | ENSG00000221962 | -0,160602161 | 3,804850861 | 0,7777838 | 0,386899863 |
| 8442 | ENSG00000221963 | 0,384499765  | 6,594826595 | 0,8204417 | 0,374397167 |
| 8443 | ENSG00000221968 | -0,247634365 | 5,084781611 | 2,0480811 | 0,16578127  |
| 8444 | ENSG00000221978 | 0,100572535  | 6,094886079 | 0,5152873 | 0,480031948 |
| 8445 | ENSG00000221983 | 0,155462589  | 7,471559956 | 0,6920164 | 0,413991902 |
| 8446 | ENSG00000221986 | -1,022362328 | 6,388645042 | 17,077788 | 0,000401282 |
| 8447 | ENSG00000222011 | -0,085144572 | 3,63181884  | 0,3064189 | 0,670335635 |
| 8448 | ENSG00000222041 | 0,432850167  | 4,445220524 | 1,9232376 | 0,178731195 |
| 8449 | ENSG00000222489 | 0,092795618  | 4,332712928 | 0,0995024 | 0,755258137 |
| 8450 | ENSG00000223247 | 0,87719187   | 5,554993697 | 2,2539363 | 0,146814057 |
| 8451 | ENSG00000223361 | -0,150059716 | 6,157002248 | 0,365677  | 0,55126119  |
| 8452 | ENSG00000223416 | -0,024513343 | 4,145502664 | 0,0050607 | 0,943899605 |
| 8453 | ENSG00000223459 | 0,216867924  | 4,067946293 | 0,933702  | 0,343905518 |
| 8454 | ENSG00000223482 | -0,220861638 | 5,883415689 | 1,2856473 | 0,268475781 |
| 8455 | ENSG00000223496 | 0,086933787  | 4,846232443 | 0,2376825 | 0,630477331 |
| 8456 | ENSG00000223501 | 0,17711301   | 4,471968781 | 1,3308278 | 0,272696113 |
| 8457 | ENSG00000223509 | 0,104736669  | 4,546950939 | 0,1386199 | 0,713048948 |
| 8458 | ENSG00000223529 | 0,368706152  | 3,891356832 | 1,6212752 | 0,215571854 |
| 8459 | ENSG00000223546 | 0,101861064  | 3,676984995 | 0,9090583 | 0,583528797 |
| 8460 | ENSG00000223547 | 0,230658189  | 3,826613977 | 1,5221925 | 0,229687396 |
| 8461 | ENSG00000223551 | 0,607821933  | 4,144385057 | 2,4506171 | 0,131068626 |
| 8462 | ENSG00000223705 | 0,040524416  | 4,618867928 | 0,0386048 | 0,845951066 |
| 8463 | ENSG00000223745 | 0,058427408  | 4,08391003  | 0,0970156 | 0,758232999 |
| 8464 | ENSG00000223865 | 1,20201528   | 5,596065907 | 20,19269  | 0,000162785 |
| 8465 | ENSG00000223891 | -0,146543207 | 3,804880019 | 0,891325  | 0,39664639  |
| 8466 | ENSG00000223930 | -0,803636138 | 4,776886024 | 10,063503 | 0,004233574 |
| 8467 | ENSG00000223959 | -0,301225626 | 3,749265424 | 2,9933531 | 0,10385289  |
| 8468 | ENSG00000223960 | -0,024894569 | 4,018956364 | 0,0199156 | 0,888995931 |
| 8469 | ENSG00000224078 | 0,172997434  | 9,609359062 | 0,3096794 | 0,583225412 |
| 8470 | ENSG00000224094 | -0,028989319 | 4,912002565 | 0,0125243 | 0,911859324 |
| 8471 | ENSG00000224389 | 0,952011991  | 6,88474476  | 2,7082777 | 0,113361286 |
| 8472 | ENSG00000224411 | -0,100365251 | 4,717587706 | 0,1850412 | 0,671060561 |
| 8473 | ENSG00000224470 | 0,263937763  | 5,218322114 | 2,1802803 | 0,153285071 |
| 8474 | ENSG00000224531 | -0,105321787 | 4,614485095 | 0,4242772 | 0,521234887 |
| 8475 | ENSG00000224546 | 0,328906552  | 5,185270683 | 3,2866616 | 0,082854336 |
| 8476 | ENSG00000224578 | 0,377601162  | 5,724588649 | 7,0653685 | 0,014000508 |
| 8477 | ENSG00000224597 | -0,204935085 | 4,462203723 | 2,567048  | 0,133718192 |
| 8478 | ENSG00000224631 | 0,219983896  | 5,233588596 | 0,8591325 | 0,363559949 |
| 8479 | ENSG00000224660 | -0,040902531 | 4,123418534 | 0,0467521 | 0,830711334 |
| 8480 | ENSG00000224712 | 0,029806682  | 3,731965606 | 0,0212463 | 0,931334616 |
| 8481 | ENSG00000224819 | -0,433094953 | 4,368246563 | 1,0648408 | 0,312791386 |
| 8482 | ENSG00000224858 | 0,200935605  | 4,261533846 | 1,0797899 | 0,309493654 |
| 8483 | ENSG00000224861 | -0,089866882 | 5,669736803 | 0,3930937 | 0,536809667 |
| 8484 | ENSG00000224877 | -0,129979924 | 4,344060623 | 0,5670521 | 0,459034763 |
| 8485 | ENSG00000224914 | -0,071066036 | 4,142811465 | 0,1803055 | 0,675037504 |
| 8486 | ENSG00000224957 | -0,136338241 | 3,553613733 | 0,3024573 | 0,587621792 |
| 8487 | ENSG00000225031 | 0,294836188  | 5,822745095 | 2,9255037 | 0,100581953 |
| 8488 | ENSG00000225071 | -0,076989958 | 4,470075987 | 0,0467981 | 0,830629488 |
| 8489 | ENSG00000225137 | -0,103169069 | 3,844607527 | 0,445889  | 0,606101611 |
| 8490 | ENSG00000225151 | 0,201457185  | 4,342829525 | 1,1447815 | 0,295691097 |
| 8491 | ENSG00000225178 | 0,115889435  | 6,198438587 | 0,2067337 | 0,653581318 |
| 8492 | ENSG00000225190 | 0,038172679  | 4,156154127 | 0,0314382 | 0,860810897 |
| 8493 | ENSG00000225405 | 0,27891637   | 3,678526059 | 0,7380588 | 0,399106179 |
| 8494 | ENSG00000225470 | -0,234010458 | 4,465224271 | 0,6107697 | 0,442430559 |

|      |                 |              |             |           |             |
|------|-----------------|--------------|-------------|-----------|-------------|
| 8495 | ENSG00000225484 | -0,092589349 | 5,629539792 | 0,188243  | 0,668405959 |
| 8496 | ENSG00000225630 | 0,083540476  | 11,07023934 | 0,0655765 | 0,800155167 |
| 8497 | ENSG00000225648 | 0,177188133  | 4,365894783 | 1,4667988 | 0,23806482  |
| 8498 | ENSG00000225695 | 0,284500857  | 3,783427973 | 4,8053219 | 0,116009988 |
| 8499 | ENSG00000225733 | 0,292953153  | 6,568164903 | 6,0191314 | 0,022078973 |
| 8500 | ENSG00000225746 | -1,398965992 | 5,010454721 | 8,1370102 | 0,008983623 |
| 8501 | ENSG00000225793 | -0,148205086 | 4,011017356 | 0,120101  | 0,732060223 |
| 8502 | ENSG00000225830 | 0,152947836  | 5,458095919 | 1,5229663 | 0,229529865 |
| 8503 | ENSG00000225921 | -0,2149767   | 4,990235148 | 4,0281697 | 0,089802271 |
| 8504 | ENSG00000225972 | -0,050135672 | 9,046140735 | 0,0345855 | 0,854089351 |
| 8505 | ENSG00000226084 | 0,05043552   | 7,026050151 | 0,0361208 | 0,850925478 |
| 8506 | ENSG00000226085 | -0,526508275 | 5,055132919 | 9,1585269 | 0,005986152 |
| 8507 | ENSG00000226121 | 0,075282908  | 4,704528279 | 0,3857123 | 0,547674819 |
| 8508 | ENSG00000226149 | 0,198655793  | 3,868287487 | 0,9410947 | 0,34203962  |
| 8509 | ENSG00000226221 | 0,073789749  | 5,353723462 | 0,0726432 | 0,78991814  |
| 8510 | ENSG00000226259 | -0,011582824 | 4,541953637 | 0,0035327 | 0,953115566 |
| 8511 | ENSG00000226306 | -0,378543626 | 6,475851767 | 1,4100909 | 0,247102206 |
| 8512 | ENSG00000226312 | -0,460369033 | 4,166812563 | 1,9612456 | 0,174662379 |
| 8513 | ENSG00000226380 | 0,049423961  | 3,92990965  | 0,0222629 | 0,882684199 |
| 8514 | ENSG00000226415 | -0,44388753  | 4,914395122 | 5,4888879 | 0,028108744 |
| 8515 | ENSG00000226419 | 0,228214576  | 3,629290024 | 0,8026199 | 0,379547448 |
| 8516 | ENSG00000226479 | -0,09213422  | 4,799235929 | 0,4226721 | 0,522001293 |
| 8517 | ENSG00000226564 | -0,080755671 | 4,325576258 | 0,105407  | 0,748355304 |
| 8518 | ENSG00000226688 | -0,197278779 | 3,64273374  | 1,0183127 | 0,323367867 |
| 8519 | ENSG00000226752 | 0,713680852  | 4,528347819 | 6,2391371 | 0,020050127 |
| 8520 | ENSG00000226784 | -0,018939315 | 4,937000489 | 0,0214715 | 0,884768026 |
| 8521 | ENSG00000226891 | -0,08166489  | 3,77911801  | 0,0714334 | 0,791631462 |
| 8522 | ENSG00000226950 | -0,191219261 | 4,535242888 | 1,3011799 | 0,26568011  |
| 8523 | ENSG00000226964 | -0,316418874 | 3,663297832 | 5,715802  | 0,111297321 |
| 8524 | ENSG00000227008 | -0,041188869 | 4,884729225 | 0,0240171 | 0,878186845 |
| 8525 | ENSG00000227028 | 0,006499337  | 4,657525333 | 0,0003733 | 0,984750471 |
| 8526 | ENSG00000227057 | 0,051481556  | 4,09063831  | 0,0809417 | 0,815132079 |
| 8527 | ENSG00000227063 | 0,121549605  | 7,624756006 | 0,3336229 | 0,569118291 |
| 8528 | ENSG00000227081 | 0,350827692  | 5,832425296 | 2,5734315 | 0,122250563 |
| 8529 | ENSG00000227097 | 0,405975907  | 4,401980357 | 2,9537925 | 0,099044495 |
| 8530 | ENSG00000227124 | 0,113322333  | 4,100278195 | 0,5964855 | 0,476616604 |
| 8531 | ENSG00000227232 | 0,06042111   | 4,379133256 | 0,088517  | 0,768728811 |
| 8532 | ENSG00000227345 | -0,069464161 | 5,450671766 | 0,1587854 | 0,693934555 |
| 8533 | ENSG00000227372 | 0,056081602  | 4,445491552 | 0,137453  | 0,817159287 |
| 8534 | ENSG00000227615 | 0,172325426  | 4,0442653   | 0,6898815 | 0,41470251  |
| 8535 | ENSG00000227671 | -0,137820729 | 4,05155725  | 0,5077425 | 0,483249829 |
| 8536 | ENSG00000227729 | -0,869492722 | 4,202064999 | 4,3850992 | 0,047415536 |
| 8537 | ENSG00000227733 | 0,4797204    | 3,769465386 | 5,0412602 | 0,034609641 |
| 8538 | ENSG00000227827 | 0,499340564  | 4,285079973 | 4,37643   | 0,047617199 |
| 8539 | ENSG00000228223 | 0,33475964   | 4,898853649 | 7,0997596 | 0,013790032 |
| 8540 | ENSG00000228253 | 0,251069713  | 9,11012344  | 0,4478469 | 0,509989302 |
| 8541 | ENSG00000228327 | -0,054525843 | 4,828050573 | 0,0544481 | 0,817550662 |
| 8542 | ENSG00000228463 | -0,035446138 | 3,83624297  | 0,0341741 | 0,854949507 |
| 8543 | ENSG00000228474 | -0,118870724 | 5,976257808 | 0,4148305 | 0,525868431 |
| 8544 | ENSG00000228502 | 0,435825103  | 8,780561303 | 2,3770469 | 0,136711408 |
| 8545 | ENSG00000228532 | -0,004984025 | 3,738114012 | 0,0014485 | 0,993983509 |
| 8546 | ENSG00000228589 | -0,121490097 | 4,045332684 | 0,8029727 | 0,476048053 |
| 8547 | ENSG00000228695 | 0,292761386  | 4,088934888 | 0,8327773 | 0,370891749 |
| 8548 | ENSG00000228696 | -0,512511308 | 4,528013184 | 3,4651321 | 0,075441318 |
| 8549 | ENSG00000228716 | 0,111473528  | 3,964858141 | 0,2015512 | 0,657652826 |
| 8550 | ENSG00000228794 | -0,230686653 | 6,102649969 | 0,9825457 | 0,331835613 |
| 8551 | ENSG00000228929 | 0,038933984  | 4,225498273 | 0,032514  | 0,858475823 |
| 8552 | ENSG00000229117 | 0,161197855  | 9,253647501 | 0,5377993 | 0,470711981 |
| 8553 | ENSG00000229119 | -0,027171769 | 6,049737905 | 0,0095616 | 0,922947445 |

|      |                 |              |             |           |             |
|------|-----------------|--------------|-------------|-----------|-------------|
| 8554 | ENSG00000229180 | -0,119760594 | 4,079262457 | 0,3972462 | 0,534697289 |
| 8555 | ENSG00000229236 | 0,02677164   | 4,217879795 | 0,0033164 | 0,954571783 |
| 8556 | ENSG00000229240 | -0,188317316 | 4,269965487 | 0,3489462 | 0,5604428   |
| 8557 | ENSG00000229344 | -0,277233033 | 7,817917762 | 1,1341588 | 0,297889583 |
| 8558 | ENSG00000229358 | -0,136939112 | 4,606765035 | 0,2142182 | 0,647809281 |
| 8559 | ENSG00000229419 | 0,096243237  | 5,120813976 | 0,522965  | 0,476809699 |
| 8560 | ENSG00000229503 | -0,005262164 | 4,626324982 | 0,0003153 | 0,985985872 |
| 8561 | ENSG00000229605 | 0,007033861  | 6,140762516 | 0,0008111 | 0,977523531 |
| 8562 | ENSG00000229619 | -0,028952231 | 3,711860499 | 0,0467922 | 0,897044322 |
| 8563 | ENSG00000229638 | 0,087758468  | 6,356506753 | 0,1797488 | 0,675509061 |
| 8564 | ENSG00000229644 | -0,458120065 | 6,063831041 | 1,6214681 | 0,215545457 |
| 8565 | ENSG00000229939 | 0,205781622  | 3,378813414 | 1,14673   | 0,308471279 |
| 8566 | ENSG00000229944 | -0,204272827 | 3,821244513 | 0,5917783 | 0,449522811 |
| 8567 | ENSG00000230076 | 0,287533117  | 5,191188963 | 1,3178886 | 0,262715012 |
| 8568 | ENSG00000230084 | -0,134284013 | 4,541877133 | 0,3195893 | 0,5773016   |
| 8569 | ENSG00000230124 | -0,157856345 | 4,389370326 | 2,4022422 | 0,277947065 |
| 8570 | ENSG00000230202 | 0,03907859   | 5,375739415 | 0,0374899 | 0,848162474 |
| 8571 | ENSG00000230204 | -0,025452426 | 4,957480032 | 0,0122862 | 0,912697589 |
| 8572 | ENSG00000230207 | 0,131839659  | 4,646687479 | 0,3675585 | 0,550246801 |
| 8573 | ENSG00000230291 | 0,135234002  | 4,456915829 | 0,5126493 | 0,481166198 |
| 8574 | ENSG00000230373 | 0,160550789  | 3,889696184 | 0,7398912 | 0,398530563 |
| 8575 | ENSG00000230383 | 0,04252547   | 4,750830071 | 0,0294425 | 0,865254704 |
| 8576 | ENSG00000230409 | -0,023999806 | 3,843873478 | 0,0367661 | 0,931179008 |
| 8577 | ENSG00000230551 | 0,025065393  | 5,081928562 | 0,0056575 | 0,940689918 |
| 8578 | ENSG00000230590 | -0,039909175 | 7,496602706 | 0,0289929 | 0,866277163 |
| 8579 | ENSG00000230606 | 0,658978828  | 4,169543973 | 6,2657295 | 0,019816074 |
| 8580 | ENSG00000230629 | 0,199842934  | 5,668107691 | 0,6079624 | 0,443467641 |
| 8581 | ENSG00000230630 | -0,044476485 | 4,188225151 | 0,039817  | 0,843583846 |
| 8582 | ENSG00000230943 | -1,630150547 | 4,117202781 | 27,581992 | 2,46573E-05 |
| 8583 | ENSG00000230989 | -0,396509652 | 6,249793575 | 4,8948448 | 0,037089165 |
| 8584 | ENSG00000231006 | 0,007571345  | 5,627328653 | 0,0006326 | 0,980149316 |
| 8585 | ENSG00000231074 | -0,034719431 | 5,685828557 | 0,034105  | 0,855094443 |
| 8586 | ENSG00000231341 | -0,441391856 | 3,978555299 | 4,9297994 | 0,036479598 |
| 8587 | ENSG00000231365 | -0,062145505 | 4,061566475 | 0,115906  | 0,736592888 |
| 8588 | ENSG00000231389 | 1,143144613  | 6,477707115 | 14,068509 | 0,001035722 |
| 8589 | ENSG00000231500 | 0,180436422  | 8,708609298 | 0,5008016 | 0,486223514 |
| 8590 | ENSG00000231607 | -0,142516664 | 3,728871645 | 0,43074   | 0,518107366 |
| 8591 | ENSG00000231721 | -0,216249658 | 5,54514798  | 1,0613139 | 0,3135764   |
| 8592 | ENSG00000231747 | 0,195491551  | 3,65456568  | 0,5069015 | 0,483608485 |
| 8593 | ENSG00000231811 | -0,538241112 | 4,421561514 | 0,8077088 | 0,378066308 |
| 8594 | ENSG00000231925 | 0,173041083  | 5,583823345 | 0,6977535 | 0,41209149  |
| 8595 | ENSG00000231991 | 0,246492818  | 4,583415754 | 0,7417624 | 0,397944036 |
| 8596 | ENSG00000232112 | -0,322121081 | 5,204286606 | 1,3369351 | 0,259387365 |
| 8597 | ENSG00000232119 | -0,287247342 | 5,210437982 | 4,915442  | 0,036691965 |
| 8598 | ENSG00000232187 | 0,000942554  | 5,564188901 | 2,014E-05 | 0,996458109 |
| 8599 | ENSG00000232310 | 0,774542922  | 3,977892997 | 5,1975551 | 0,032165776 |
| 8600 | ENSG00000232385 | 0,291631708  | 4,312971016 | 0,8934164 | 0,354330403 |
| 8601 | ENSG00000232388 | -0,352302872 | 4,259561531 | 2,9617083 | 0,098619183 |
| 8602 | ENSG00000232573 | 0,495703909  | 5,86307851  | 2,1509197 | 0,155959562 |
| 8603 | ENSG00000232593 | 0,155660114  | 4,150258457 | 0,6207215 | 0,438785113 |
| 8604 | ENSG00000232653 | 0,224557119  | 4,956917064 | 1,6088024 | 0,217287509 |
| 8605 | ENSG00000232931 | 0,324501386  | 4,495600189 | 1,9187052 | 0,179224078 |
| 8606 | ENSG00000233024 | 0,110380857  | 4,766957642 | 0,3584692 | 0,555180758 |
| 8607 | ENSG00000233045 | 0,361601875  | 4,097070931 | 2,8714017 | 0,103600315 |
| 8608 | ENSG00000233057 | 0,416934134  | 4,403022924 | 1,727453  | 0,201631158 |
| 8609 | ENSG00000233117 | 0,531673353  | 5,819198213 | 3,3113984 | 0,081778493 |
| 8610 | ENSG00000233178 | -0,39690787  | 5,094713498 | 1,5354878 | 0,227726931 |
| 8611 | ENSG00000233237 | -0,215608128 | 6,097602525 | 0,849645  | 0,366174987 |
| 8612 | ENSG00000233254 | 0,030454918  | 4,163732577 | 0,0111288 | 0,916894661 |

|      |                 |              |             |           |             |
|------|-----------------|--------------|-------------|-----------|-------------|
| 8613 | ENSG00000233276 | 0,162743514  | 5,739271199 | 0,6156917 | 0,440621585 |
| 8614 | ENSG00000233369 | 0,247636953  | 7,500700404 | 2,6933346 | 0,114260997 |
| 8615 | ENSG00000233396 | -0,103133086 | 4,615327129 | 0,1888818 | 0,667879591 |
| 8616 | ENSG00000233426 | 0,302627668  | 3,936929504 | 5,5868452 | 0,094021415 |
| 8617 | ENSG00000233476 | 0,441812847  | 10,69961457 | 2,9072949 | 0,101557017 |
| 8618 | ENSG00000233559 | -0,381094287 | 3,457992602 | 1,4148241 | 0,246333429 |
| 8619 | ENSG00000233766 | 0,159475802  | 3,355566306 | 0,4447934 | 0,511421641 |
| 8620 | ENSG00000233913 | 0,281604635  | 6,356942678 | 1,7244052 | 0,202015402 |
| 8621 | ENSG00000233927 | 0,008641554  | 6,536679572 | 0,0010022 | 0,975016739 |
| 8622 | ENSG00000233954 | -0,536491146 | 4,611168374 | 4,8138853 | 0,038545406 |
| 8623 | ENSG00000234127 | 0,117940701  | 4,236158248 | 0,5713417 | 0,512817731 |
| 8624 | ENSG00000234268 | 0,327772325  | 3,529185336 | 1,6387476 | 0,213196936 |
| 8625 | ENSG00000234287 | 0,334280984  | 5,373226124 | 2,077095  | 0,162936504 |
| 8626 | ENSG00000234352 | -0,453161772 | 5,455442389 | 0,8845668 | 0,356680437 |
| 8627 | ENSG00000234354 | 0,079157333  | 4,27889277  | 0,0575988 | 0,812448005 |
| 8628 | ENSG00000234420 | 0,150924278  | 4,493273369 | 0,5445843 | 0,467966102 |
| 8629 | ENSG00000234444 | 0,046031825  | 4,429802969 | 0,1369181 | 0,742003541 |
| 8630 | ENSG00000234456 | 0,047517186  | 6,705504022 | 0,0999781 | 0,754689815 |
| 8631 | ENSG00000234498 | 0,177605309  | 4,756199677 | 0,527777  | 0,474836726 |
| 8632 | ENSG00000234520 | -0,848282802 | 6,744421776 | 5,4721601 | 0,028325556 |
| 8633 | ENSG00000234545 | -0,105049993 | 4,556944018 | 0,3919846 | 0,537392584 |
| 8634 | ENSG00000234585 | -0,024777401 | 3,592496817 | 0,034312  | 0,882928806 |
| 8635 | ENSG00000234616 | 0,108968061  | 4,023820711 | 0,1931401 | 0,664397508 |
| 8636 | ENSG00000234618 | -0,146844914 | 4,479639672 | 0,3362007 | 0,567640285 |
| 8637 | ENSG00000234648 | 0,528497692  | 4,597471804 | 2,7292714 | 0,112046619 |
| 8638 | ENSG00000234684 | -0,042707522 | 3,593072118 | 0,0701079 | 0,7935267   |
| 8639 | ENSG00000234741 | 0,541905271  | 5,631935531 | 7,0477968 | 0,014122127 |
| 8640 | ENSG00000234742 | 0,128336256  | 3,735938984 | 0,2078608 | 0,652704043 |
| 8641 | ENSG00000234745 | 0,23863899   | 7,949888379 | 1,3354253 | 0,259649136 |
| 8642 | ENSG00000234797 | 0,274400243  | 7,524309492 | 1,1251321 | 0,29977504  |
| 8643 | ENSG00000234851 | 0,107311157  | 4,705548532 | 0,134305  | 0,717343071 |
| 8644 | ENSG00000234964 | -1,029402712 | 4,529657094 | 18,518496 | 0,000261963 |
| 8645 | ENSG00000234975 | 0,015912745  | 5,196324759 | 0,0038485 | 0,95106707  |
| 8646 | ENSG00000235050 | -0,502331833 | 5,24792578  | 1,5336092 | 0,228002643 |
| 8647 | ENSG00000235109 | 0,404682653  | 4,001031939 | 2,2216276 | 0,149611412 |
| 8648 | ENSG00000235160 | -0,304667511 | 5,240256583 | 0,6443572 | 0,43031484  |
| 8649 | ENSG00000235174 | 0,178741533  | 6,69770643  | 0,6134659 | 0,441438192 |
| 8650 | ENSG00000235244 | 0,014043914  | 3,705462641 | 0,003067  | 0,956310933 |
| 8651 | ENSG00000235257 | -0,015401723 | 3,551136546 | 0,0037945 | 0,951411651 |
| 8652 | ENSG00000235436 | -0,408406427 | 3,658028867 | 1,7688353 | 0,196502575 |
| 8653 | ENSG00000235437 | 0,255032846  | 4,56986066  | 1,9601115 | 0,174782143 |
| 8654 | ENSG00000235508 | -0,10203137  | 3,638881082 | 0,1187575 | 0,733502075 |
| 8655 | ENSG00000235535 | -0,058487832 | 6,365305464 | 0,011615  | 0,915106053 |
| 8656 | ENSG00000235552 | 0,065380516  | 7,355259965 | 0,0736579 | 0,788492783 |
| 8657 | ENSG00000235652 | 0,174792539  | 3,888158807 | 0,9115756 | 0,349576663 |
| 8658 | ENSG00000235655 | -0,061009404 | 5,706619477 | 0,2464055 | 0,624289305 |
| 8659 | ENSG00000235703 | 0,322637262  | 3,840821836 | 2,9350455 | 0,100060289 |
| 8660 | ENSG00000235750 | -0,617578871 | 5,094689777 | 6,7742266 | 0,015876334 |
| 8661 | ENSG00000235954 | -0,077302321 | 4,057242838 | 0,2445574 | 0,625601633 |
| 8662 | ENSG00000236088 | 0,106367084  | 3,483259044 | 0,4307056 | 0,609953568 |
| 8663 | ENSG00000236287 | -0,276843191 | 5,682402591 | 4,5582088 | 0,043544791 |
| 8664 | ENSG00000236404 | -0,085077043 | 4,169761961 | 0,1379582 | 0,71370248  |
| 8665 | ENSG00000236438 | -0,143946315 | 4,190850659 | 0,3140662 | 0,580587874 |
| 8666 | ENSG00000236439 | 0,290031279  | 5,534839693 | 1,5685309 | 0,222945351 |
| 8667 | ENSG00000236534 | -0,005778229 | 4,007040864 | 0,0022571 | 0,999736648 |
| 8668 | ENSG00000236552 | 0,249885287  | 6,440148794 | 1,2732934 | 0,270726861 |
| 8669 | ENSG00000236581 | -0,327231041 | 5,06218727  | 2,3594979 | 0,138099708 |
| 8670 | ENSG00000236824 | -0,213615839 | 4,35378845  | 0,2082624 | 0,65239223  |
| 8671 | ENSG00000236876 | 0,567281897  | 4,475139998 | 3,5063492 | 0,073839355 |

|      |                 |              |             |           |             |
|------|-----------------|--------------|-------------|-----------|-------------|
| 8672 | ENSG00000237094 | -0,226094792 | 4,092511989 | 0,5077205 | 0,483259223 |
| 8673 | ENSG00000237125 | 0,006999317  | 6,91808009  | 0,0012152 | 0,972490955 |
| 8674 | ENSG00000237187 | 0,441463255  | 4,287619559 | 3,9364029 | 0,059250648 |
| 8675 | ENSG00000237190 | -0,163161264 | 4,113838277 | 1,218502  | 0,326824487 |
| 8676 | ENSG00000237238 | -0,656992271 | 3,872330401 | 6,1419753 | 0,020931783 |
| 8677 | ENSG00000237296 | -0,210892036 | 6,5529048   | 0,7734883 | 0,388192781 |
| 8678 | ENSG00000237298 | -0,381558985 | 7,409970927 | 0,635305  | 0,433528195 |
| 8679 | ENSG00000237440 | 0,184528987  | 4,220432644 | 1,1424937 | 0,296162735 |
| 8680 | ENSG00000237441 | 0,010283731  | 5,04323474  | 0,0039624 | 0,950349716 |
| 8681 | ENSG00000237491 | -0,325166581 | 3,763105198 | 2,9418847 | 0,099688313 |
| 8682 | ENSG00000237506 | -0,011284499 | 5,297566628 | 0,0026923 | 0,959064239 |
| 8683 | ENSG00000237550 | 0,212329357  | 7,999192076 | 0,8069297 | 0,378292527 |
| 8684 | ENSG00000237596 | 0,687322341  | 3,985227442 | 5,7860385 | 0,02455004  |
| 8685 | ENSG00000237748 | -0,906666771 | 5,95042776  | 7,217151  | 0,013144287 |
| 8686 | ENSG00000237765 | -0,056146928 | 4,596792123 | 0,1040205 | 0,749956523 |
| 8687 | ENSG00000237973 | -0,136134682 | 13,62010213 | 0,3163628 | 0,579197995 |
| 8688 | ENSG00000237975 | 0,263672996  | 3,785077592 | 0,7340141 | 0,400381159 |
| 8689 | ENSG00000237984 | 0,003390948  | 4,076985018 | 0,0003345 | 0,985564581 |
| 8690 | ENSG00000237986 | -0,183664833 | 4,681551571 | 0,4976319 | 0,487591862 |
| 8691 | ENSG00000238083 | -0,347692419 | 5,236478306 | 2,6878475 | 0,114658046 |
| 8692 | ENSG00000238103 | 0,242401176  | 7,358055158 | 0,9943676 | 0,329003207 |
| 8693 | ENSG00000238741 | 0,005871644  | 7,479871772 | 0,0003105 | 0,986092005 |
| 8694 | ENSG00000239246 | 0,303586572  | 4,103964249 | 2,7056787 | 0,113525295 |
| 8695 | ENSG00000239305 | -0,111984363 | 5,441314243 | 0,5554756 | 0,463601289 |
| 8696 | ENSG00000239306 | -0,114389016 | 4,377150411 | 0,2785548 | 0,602680601 |
| 8697 | ENSG00000239470 | -0,038918266 | 5,188500377 | 0,0336122 | 0,856133045 |
| 8698 | ENSG00000239474 | -1,237869677 | 6,638725297 | 6,8349067 | 0,01546735  |
| 8699 | ENSG00000239665 | -0,037356917 | 4,513046644 | 0,0328988 | 0,857650356 |
| 8700 | ENSG00000239797 | -0,034749694 | 5,327725961 | 0,0193632 | 0,890535749 |
| 8701 | ENSG00000239883 | -0,157120424 | 5,004776168 | 0,5606729 | 0,461542007 |
| 8702 | ENSG00000239899 | 0,463284371  | 6,173929288 | 1,0403439 | 0,318299775 |
| 8703 | ENSG00000240036 | 0,025044062  | 4,030392962 | 0,01474   | 0,904416764 |
| 8704 | ENSG00000240038 | 0,084879286  | 5,364273231 | 0,2332274 | 0,633683928 |
| 8705 | ENSG00000240087 | 0,130926208  | 5,393601493 | 0,3204809 | 0,576774634 |
| 8706 | ENSG00000240184 | 0,230733339  | 3,921677578 | 0,6573373 | 0,425771706 |
| 8707 | ENSG00000240225 | -0,049535176 | 4,013943937 | 0,1395966 | 0,777653223 |
| 8708 | ENSG00000240342 | 0,117391104  | 6,06575915  | 0,3123364 | 0,581624972 |
| 8709 | ENSG00000240344 | -0,062205134 | 4,108066244 | 0,1014025 | 0,753012706 |
| 8710 | ENSG00000240376 | 0,270978343  | 4,008652754 | 1,4836091 | 0,235499258 |
| 8711 | ENSG00000240445 | 0,098860245  | 4,431540884 | 0,3155231 | 0,579717308 |
| 8712 | ENSG00000240583 | 0,042123097  | 8,18768483  | 0,0100543 | 0,920993702 |
| 8713 | ENSG00000240674 | -0,009920372 | 4,186582483 | 0,0015028 | 0,969409388 |
| 8714 | ENSG00000240857 | -0,482514607 | 4,824807354 | 7,5594915 | 0,011388197 |
| 8715 | ENSG00000240869 | 0,36422294   | 8,069102278 | 0,6328568 | 0,434403733 |
| 8716 | ENSG00000240914 | 0,410321326  | 4,313863093 | 3,7625722 | 0,064711055 |
| 8717 | ENSG00000241058 | 0,026551265  | 4,128442959 | 0,0527073 | 0,84465375  |
| 8718 | ENSG00000241135 | -1,145230136 | 5,216148104 | 12,281086 | 0,001897221 |
| 8719 | ENSG00000241158 | -0,634443107 | 4,281203482 | 2,1112982 | 0,159658278 |
| 8720 | ENSG00000241258 | 0,041064315  | 4,440001332 | 0,1310566 | 0,879418174 |
| 8721 | ENSG00000241316 | -0,225238443 | 3,867992757 | 2,1520433 | 0,198349381 |
| 8722 | ENSG00000241399 | 0,126536311  | 3,856320754 | 0,3672179 | 0,550430187 |
| 8723 | ENSG00000241429 | 0,339358418  | 5,964619152 | 1,6648342 | 0,209711709 |
| 8724 | ENSG00000241458 | 0,163870081  | 4,293361792 | 0,3381606 | 0,566521647 |
| 8725 | ENSG00000241468 | -0,507463046 | 5,461576081 | 7,6646799 | 0,010901958 |
| 8726 | ENSG00000241506 | -0,390456007 | 5,286331511 | 2,8777331 | 0,103241691 |
| 8727 | ENSG00000241549 | 0,344436251  | 3,334603866 | 3,5748686 | 0,118237037 |
| 8728 | ENSG00000241553 | -0,09012695  | 4,564882014 | 0,277621  | 0,603285636 |
| 8729 | ENSG00000241560 | -0,070697361 | 3,853337926 | 0,1082864 | 0,745066795 |
| 8730 | ENSG00000241612 | -0,018358201 | 3,967211411 | 0,0059687 | 0,939083871 |

|      |                 |              |             |           |             |
|------|-----------------|--------------|-------------|-----------|-------------|
| 8731 | ENSG00000241644 | 1,925553859  | 6,400936023 | 10,233321 | 0,003972267 |
| 8732 | ENSG00000241684 | 0,30689414   | 4,129756834 | 3,0958905 | 0,091722289 |
| 8733 | ENSG00000241685 | -0,064572328 | 3,838192547 | 0,2479405 | 0,749808233 |
| 8734 | ENSG00000241837 | -0,734687927 | 6,593127544 | 10,536097 | 0,003549181 |
| 8735 | ENSG00000241839 | -0,057412244 | 4,492447523 | 0,0596348 | 0,809228865 |
| 8736 | ENSG00000241860 | -0,354383998 | 3,934491768 | 1,0796644 | 0,309521146 |
| 8737 | ENSG00000241878 | 0,052153031  | 4,138902616 | 0,0690178 | 0,795099776 |
| 8738 | ENSG00000241973 | -0,047045686 | 5,988985551 | 0,0460278 | 0,832006919 |
| 8739 | ENSG00000242071 | 0,355377141  | 5,955710528 | 3,4055213 | 0,077829196 |
| 8740 | ENSG00000242086 | -0,318958064 | 5,905610717 | 1,4306066 | 0,243792111 |
| 8741 | ENSG00000242193 | -0,170382964 | 3,803645368 | 0,8163915 | 0,375558617 |
| 8742 | ENSG00000242247 | -0,230382578 | 5,218465324 | 3,0632172 | 0,093302437 |
| 8743 | ENSG00000242259 | 0,020117081  | 5,002620353 | 0,0303958 | 0,900659783 |
| 8744 | ENSG00000242299 | 0,104758641  | 4,917096437 | 0,0993553 | 0,755433005 |
| 8745 | ENSG00000242372 | -0,134003613 | 3,924561913 | 0,376055  | 0,545710059 |
| 8746 | ENSG00000242485 | -0,379349947 | 5,455703475 | 5,1897775 | 0,032282714 |
| 8747 | ENSG00000242498 | 0,286515166  | 4,539460217 | 1,7573697 | 0,19790719  |
| 8748 | ENSG00000242571 | -0,039853895 | 4,686112806 | 0,0228361 | 0,881195355 |
| 8749 | ENSG00000242759 | -0,261980959 | 3,789628358 | 1,7095348 | 0,203903221 |
| 8750 | ENSG00000243071 | 0,015099117  | 5,252130571 | 0,0033771 | 0,954157935 |
| 8751 | ENSG00000243147 | -0,696899136 | 6,27038967  | 11,378529 | 0,002610811 |
| 8752 | ENSG00000243156 | 0,237571608  | 5,6379154   | 0,5994544 | 0,44663445  |
| 8753 | ENSG00000243181 | 0,087192208  | 4,464423571 | 0,1186735 | 0,733592428 |
| 8754 | ENSG00000243199 | 0,062138943  | 4,19494995  | 0,0555809 | 0,815698504 |
| 8755 | ENSG00000243244 | 0,039869617  | 4,350830138 | 0,0143791 | 0,9055883   |
| 8756 | ENSG00000243317 | -0,087848018 | 5,131132996 | 0,4120871 | 0,527206288 |
| 8757 | ENSG00000243335 | 0,151201202  | 4,348876938 | 1,06333   | 0,373602193 |
| 8758 | ENSG00000243701 | -0,257769288 | 4,249794095 | 3,3696539 | 0,083671309 |
| 8759 | ENSG00000243716 | 0,148700315  | 7,71295743  | 0,364988  | 0,55163355  |
| 8760 | ENSG00000243927 | -0,67583571  | 4,520553738 | 5,5567756 | 0,027247652 |
| 8761 | ENSG00000243943 | 0,029764457  | 4,284854372 | 0,0912648 | 0,813722962 |
| 8762 | ENSG00000244005 | -0,094169055 | 4,344009879 | 0,4009673 | 0,532797406 |
| 8763 | ENSG00000244021 | -0,022670483 | 6,940618299 | 0,0104336 | 0,919522418 |
| 8764 | ENSG00000244038 | 0,020044541  | 6,187924387 | 0,0205809 | 0,887166037 |
| 8765 | ENSG00000244086 | 0,159718329  | 4,950826195 | 0,2933175 | 0,593285343 |
| 8766 | ENSG00000244198 | -0,132917043 | 3,867935386 | 0,2911678 | 0,594634097 |
| 8767 | ENSG00000244245 | 0,221337448  | 4,1072759   | 0,6861188 | 0,415959537 |
| 8768 | ENSG00000244313 | 0,239717683  | 5,403121847 | 1,2457505 | 0,27583548  |
| 8769 | ENSG00000244363 | -0,026896707 | 6,225895105 | 0,0078999 | 0,929941934 |
| 8770 | ENSG00000244398 | 0,027397904  | 5,167264173 | 0,0129064 | 0,910531006 |
| 8771 | ENSG00000244405 | 0,607249811  | 4,42231942  | 10,931955 | 0,003068846 |
| 8772 | ENSG00000244462 | 0,036523248  | 5,930456876 | 0,0983862 | 0,756578437 |
| 8773 | ENSG00000244509 | 0,006924468  | 4,197455487 | 0,0012297 | 0,9723275   |
| 8774 | ENSG00000244642 | 0,441327972  | 6,715597914 | 1,4238672 | 0,244873168 |
| 8775 | ENSG00000244682 | -0,384745509 | 4,615092044 | 3,0473339 | 0,094151467 |
| 8776 | ENSG00000244716 | 0,091565115  | 6,636527619 | 0,1305918 | 0,721101715 |
| 8777 | ENSG00000244731 | 0,881298222  | 6,853816416 | 2,5299897 | 0,125287212 |
| 8778 | ENSG00000244734 | 2,946441625  | 9,181845313 | 9,7062893 | 0,00484705  |
| 8779 | ENSG00000244754 | -0,112943074 | 8,15892071  | 0,2979478 | 0,590401955 |
| 8780 | ENSG00000244879 | 0,230557978  | 5,025610072 | 0,6569454 | 0,425907788 |
| 8781 | ENSG00000245205 | 0,436341744  | 5,748129523 | 2,8254988 | 0,106244217 |
| 8782 | ENSG00000245532 | -0,700262258 | 11,44192091 | 1,9220299 | 0,178862363 |
| 8783 | ENSG00000245662 | 0,362384711  | 5,111285698 | 6,0073398 | 0,022219466 |
| 8784 | ENSG00000245680 | 0,102832243  | 4,601783812 | 0,8333597 | 0,454466692 |
| 8785 | ENSG00000245910 | -0,447157672 | 5,079420449 | 4,7035853 | 0,040633883 |
| 8786 | ENSG00000245937 | -0,214208172 | 5,252351031 | 2,0107567 | 0,16952983  |
| 8787 | ENSG00000245958 | -0,11719877  | 4,223237926 | 0,632718  | 0,434450871 |
| 8788 | ENSG00000246067 | -0,378891585 | 4,137469483 | 6,0659819 | 0,021651421 |
| 8789 | ENSG00000246695 | 0,047522749  | 4,363531994 | 0,0958213 | 0,843433366 |

|      |                 |              |             |           |             |
|------|-----------------|--------------|-------------|-----------|-------------|
| 8790 | ENSG00000246705 | 0,062655711  | 4,343267727 | 0,074873  | 0,786799833 |
| 8791 | ENSG00000246859 | 0,327444947  | 3,662103454 | 1,4443516 | 0,241606172 |
| 8792 | ENSG00000247077 | -0,125797118 | 4,079933702 | 0,6130297 | 0,44159851  |
| 8793 | ENSG00000247516 | -0,395975193 | 3,776723844 | 4,8834739 | 0,037289918 |
| 8794 | ENSG00000247556 | 0,04855101   | 7,690874134 | 0,1126647 | 0,7401479   |
| 8795 | ENSG00000247572 | -0,293031426 | 3,727325672 | 1,5991579 | 0,218625895 |
| 8796 | ENSG00000247627 | 0,090419929  | 7,062320406 | 0,1227959 | 0,729195178 |
| 8797 | ENSG00000247809 | -0,202260718 | 4,183436488 | 0,9272983 | 0,345533392 |
| 8798 | ENSG00000247828 | -0,408083771 | 6,64664981  | 2,4429188 | 0,131645976 |
| 8799 | ENSG00000248019 | -0,073004441 | 4,347814167 | 0,1023808 | 0,751865585 |
| 8800 | ENSG00000248092 | -0,287168068 | 5,663295869 | 1,2989894 | 0,266072063 |
| 8801 | ENSG00000248124 | 0,085005173  | 4,203874461 | 0,4394597 | 0,592518118 |
| 8802 | ENSG00000248144 | 0,316313056  | 4,181282538 | 0,60247   | 0,445507875 |
| 8803 | ENSG00000248152 | -0,44981252  | 3,925026404 | 1,5442724 | 0,226443183 |
| 8804 | ENSG00000248290 | 0,043774652  | 5,376953564 | 0,0198003 | 0,889315403 |
| 8805 | ENSG00000248323 | -0,660461113 | 4,327911325 | 2,7668476 | 0,109737797 |
| 8806 | ENSG00000248333 | -0,078685208 | 4,682820315 | 0,2703953 | 0,608006697 |
| 8807 | ENSG00000248334 | -0,121467747 | 3,797865123 | 0,7305943 | 0,507354227 |
| 8808 | ENSG00000248483 | -0,193805813 | 3,512347305 | 1,0989086 | 0,305344564 |
| 8809 | ENSG00000248527 | -0,017545262 | 11,00298665 | 0,0062763 | 0,937534514 |
| 8810 | ENSG00000248932 | -0,074986322 | 3,71651688  | 0,1595834 | 0,693207871 |
| 8811 | ENSG00000249242 | 0,216631314  | 4,297578135 | 0,9512177 | 0,339507565 |
| 8812 | ENSG00000249264 | 0,338636537  | 6,008860531 | 1,1484915 | 0,294928394 |
| 8813 | ENSG00000249353 | 0,125762343  | 4,072922473 | 0,3018573 | 0,587990113 |
| 8814 | ENSG00000249437 | 0,092402347  | 5,968344168 | 0,2197851 | 0,64359549  |
| 8815 | ENSG00000249669 | -0,876790228 | 6,492675072 | 7,0981054 | 0,013823497 |
| 8816 | ENSG00000249839 | 0,211304021  | 4,026710095 | 1,8070438 | 0,242124636 |
| 8817 | ENSG00000249855 | 0,501067153  | 7,752562507 | 4,219316  | 0,051445237 |
| 8818 | ENSG00000250007 | -1,300298419 | 4,02233135  | 12,072717 | 0,002040601 |
| 8819 | ENSG00000250159 | -0,227531067 | 4,721289953 | 0,9283104 | 0,345275388 |
| 8820 | ENSG00000250182 | 0,435188875  | 8,100416811 | 2,555892  | 0,123466044 |
| 8821 | ENSG00000250303 | -0,770122797 | 4,749385305 | 10,330111 | 0,003831288 |
| 8822 | ENSG00000250305 | -0,871599069 | 5,735568844 | 8,4659749 | 0,007868315 |
| 8823 | ENSG00000250312 | 0,072210117  | 3,554763077 | 0,1007791 | 0,753746847 |
| 8824 | ENSG00000250317 | -0,364990865 | 4,542426484 | 3,5955651 | 0,07050343  |
| 8825 | ENSG00000250479 | -0,378888518 | 6,726251286 | 2,6397932 | 0,117777385 |
| 8826 | ENSG00000250497 | -0,602266434 | 3,861358489 | 3,8938552 | 0,060537043 |
| 8827 | ENSG00000250722 | 0,268454911  | 6,109839033 | 0,8421508 | 0,368259837 |
| 8828 | ENSG00000250891 | 0,777549687  | 5,890949543 | 3,1998917 | 0,086759111 |
| 8829 | ENSG00000250903 | -0,077060349 | 5,073662896 | 0,1803148 | 0,67502965  |
| 8830 | ENSG00000251022 | 0,051305199  | 4,415328937 | 0,1229077 | 0,729070934 |
| 8831 | ENSG00000251034 | -0,186651166 | 3,337479674 | 1,3189633 | 0,38830568  |
| 8832 | ENSG00000251136 | 0,101565775  | 5,252489261 | 0,2834013 | 0,599561447 |
| 8833 | ENSG00000251158 | 0,092769062  | 3,782256939 | 0,0737206 | 0,78840507  |
| 8834 | ENSG00000251322 | 0,382382892  | 4,97697298  | 2,291011  | 0,143680705 |
| 8835 | ENSG00000251369 | -0,034433549 | 3,811848267 | 0,0552596 | 0,830740922 |
| 8836 | ENSG00000251562 | -0,231012343 | 13,24957697 | 0,6857407 | 0,416056817 |
| 8837 | ENSG00000251615 | -0,21179061  | 3,918858456 | 0,6410907 | 0,43147006  |
| 8838 | ENSG00000251634 | 0,148843843  | 4,914867267 | 0,767595  | 0,389977072 |
| 8839 | ENSG00000251791 | 0,636274428  | 5,558187694 | 4,4451291 | 0,04604528  |
| 8840 | ENSG00000252010 | 0,888313786  | 7,403720068 | 4,6598545 | 0,041496886 |
| 8841 | ENSG00000252316 | 1,638927222  | 5,500537883 | 4,5455142 | 0,043852475 |
| 8842 | ENSG00000252835 | 0,588559419  | 4,193640291 | 2,6836292 | 0,11492796  |
| 8843 | ENSG00000253203 | 0,255703405  | 3,81985887  | 2,0829376 | 0,167108112 |
| 8844 | ENSG00000253250 | -0,579225578 | 3,962691644 | 4,1949918 | 0,05206845  |
| 8845 | ENSG00000253276 | -0,357608522 | 4,495518146 | 1,1641913 | 0,29172985  |
| 8846 | ENSG00000253284 | -0,113948891 | 4,682014563 | 0,1086858 | 0,744614497 |
| 8847 | ENSG00000253305 | -0,18487191  | 3,833156551 | 0,6304055 | 0,435283181 |
| 8848 | ENSG00000253352 | 0,116557476  | 6,691072396 | 1,1061046 | 0,303764853 |

|      |                 |              |             |           |             |
|------|-----------------|--------------|-------------|-----------|-------------|
| 8849 | ENSG00000253366 | 0,405917744  | 3,978109655 | 5,8356764 | 0,024006015 |
| 8850 | ENSG00000253368 | -0,584965219 | 4,384944648 | 8,0057361 | 0,009476423 |
| 8851 | ENSG00000253710 | -0,133869017 | 3,923636072 | 1,3242142 | 0,457249127 |
| 8852 | ENSG00000253719 | 0,093681968  | 5,959189538 | 0,7615647 | 0,39178439  |
| 8853 | ENSG00000253729 | 0,170379917  | 7,624392325 | 1,6776388 | 0,207982836 |
| 8854 | ENSG00000253731 | -0,138804903 | 4,076642739 | 0,2465502 | 0,62420435  |
| 8855 | ENSG00000253738 | -0,398459182 | 5,804120209 | 2,2418244 | 0,147855331 |
| 8856 | ENSG00000253816 | 0,32990942   | 3,60625912  | 3,0370373 | 0,099178111 |
| 8857 | ENSG00000253846 | -0,231916458 | 3,841404198 | 0,7604062 | 0,392170104 |
| 8858 | ENSG00000254004 | 0,091999561  | 4,608571276 | 0,5240341 | 0,476364525 |
| 8859 | ENSG00000254087 | -0,075186252 | 4,145508837 | 0,0842504 | 0,774206212 |
| 8860 | ENSG00000254122 | -0,004965043 | 3,525582901 | 0,0005504 | 0,981483445 |
| 8861 | ENSG00000254206 | 0,156320923  | 4,607847026 | 0,433725  | 0,516674239 |
| 8862 | ENSG00000254373 | -0,778387129 | 4,437712785 | 6,4102603 | 0,01859588  |
| 8863 | ENSG00000254634 | -0,063489832 | 5,15881057  | 0,0772143 | 0,783579219 |
| 8864 | ENSG00000254635 | 0,049925271  | 4,687278749 | 0,2339736 | 0,667261665 |
| 8865 | ENSG00000254685 | -0,05759126  | 4,301311126 | 0,0634928 | 0,803285392 |
| 8866 | ENSG00000254701 | 0,478272635  | 3,619431742 | 6,2718642 | 0,019762511 |
| 8867 | ENSG00000254838 | 0,362720414  | 3,679782156 | 2,2279649 | 0,149057717 |
| 8868 | ENSG00000254852 | -0,127039444 | 3,846877962 | 0,3109352 | 0,58246786  |
| 8869 | ENSG00000254999 | 0,049145565  | 6,128370527 | 0,1467487 | 0,705150449 |
| 8870 | ENSG00000255112 | 0,107772989  | 5,066088918 | 1,0369271 | 0,343749879 |
| 8871 | ENSG00000255248 | 0,216433385  | 6,562021068 | 1,6001492 | 0,218487859 |
| 8872 | ENSG00000255302 | -0,157961967 | 7,962472715 | 0,8350743 | 0,370227298 |
| 8873 | ENSG00000255399 | -0,493869905 | 5,055095521 | 2,5312759 | 0,125196036 |
| 8874 | ENSG00000255529 | 0,100479686  | 5,561047059 | 0,2803488 | 0,601521982 |
| 8875 | ENSG00000255583 | 0,152010423  | 3,885309045 | 0,6035367 | 0,445110471 |
| 8876 | ENSG00000255717 | -0,185577238 | 4,576540933 | 1,7356155 | 0,200570203 |
| 8877 | ENSG00000255823 | -0,40407149  | 5,996302294 | 0,3983817 | 0,534118929 |
| 8878 | ENSG00000256025 | -0,374973438 | 3,954421687 | 0,8421188 | 0,368268776 |
| 8879 | ENSG00000256043 | 0,474134264  | 4,903645444 | 7,6465339 | 0,010984176 |
| 8880 | ENSG00000256053 | -0,442555087 | 3,692120149 | 6,1061412 | 0,02613177  |
| 8881 | ENSG00000256087 | -0,056901288 | 4,458557082 | 0,2109026 | 0,720630986 |
| 8882 | ENSG00000256223 | 0,025557292  | 4,128978682 | 0,0295453 | 0,870371355 |
| 8883 | ENSG00000256235 | 0,024175407  | 4,259568026 | 0,0075242 | 0,931623737 |
| 8884 | ENSG00000256338 | 0,112724404  | 5,453066255 | 0,255861  | 0,617768526 |
| 8885 | ENSG00000256393 | 0,145701836  | 6,763533628 | 0,5267524 | 0,475260997 |
| 8886 | ENSG00000256537 | -0,328875186 | 4,988055136 | 2,8060535 | 0,107387894 |
| 8887 | ENSG00000256683 | -0,081465412 | 3,908450583 | 0,3327114 | 0,701279695 |
| 8888 | ENSG00000256751 | -0,195789474 | 3,789380419 | 1,0858947 | 0,308160547 |
| 8889 | ENSG00000256771 | -0,11953823  | 3,894681547 | 0,5460043 | 0,494460632 |
| 8890 | ENSG00000257017 | 3,247766519  | 8,692053776 | 5,118745  | 0,033373019 |
| 8891 | ENSG00000257027 | -0,011865174 | 4,146634778 | 0,0033544 | 0,954312648 |
| 8892 | ENSG00000257093 | -0,011756896 | 5,431647234 | 0,0072281 | 0,932977161 |
| 8893 | ENSG00000257103 | 0,18057741   | 6,061163659 | 3,7121591 | 0,066356607 |
| 8894 | ENSG00000257176 | -0,235016447 | 3,562036598 | 1,2630753 | 0,272607491 |
| 8895 | ENSG00000257218 | 0,015893152  | 3,69109907  | 0,0222266 | 0,935588112 |
| 8896 | ENSG00000257267 | -0,259694483 | 5,943495945 | 2,408218  | 0,134286118 |
| 8897 | ENSG00000257354 | -0,436473841 | 3,718963834 | 3,599189  | 0,070371615 |
| 8898 | ENSG00000257599 | 0,405205314  | 5,230321001 | 14,449715 | 0,000909901 |
| 8899 | ENSG00000257621 | -0,136061331 | 5,721912487 | 0,6808982 | 0,417713275 |
| 8900 | ENSG00000257923 | 0,238092062  | 6,663989491 | 1,5395906 | 0,227126214 |
| 8901 | ENSG00000258289 | 0,079312956  | 6,014646765 | 0,1394226 | 0,712258655 |
| 8902 | ENSG00000258441 | 0,229037931  | 4,39549302  | 1,3867419 | 0,250940048 |
| 8903 | ENSG00000258667 | 0,078615291  | 4,103291574 | 0,0854454 | 0,772657137 |
| 8904 | ENSG00000258890 | 0,109141741  | 5,061567198 | 0,6970531 | 0,412293195 |
| 8905 | ENSG00000259030 | -0,630955912 | 5,09157918  | 1,4866026 | 0,23504171  |
| 8906 | ENSG00000259295 | 0,112141756  | 3,936953219 | 0,2550679 | 0,61831089  |
| 8907 | ENSG00000259319 | -0,238198522 | 4,107674807 | 0,7780018 | 0,386834428 |



|      |                 |              |             |           |             |
|------|-----------------|--------------|-------------|-----------|-------------|
| 8908 | ENSG00000259330 | -0,309319037 | 5,213383996 | 3,2864479 | 0,0828637   |
| 8909 | ENSG00000259781 | -0,050452665 | 5,501964955 | 0,0648978 | 0,801168907 |
| 8910 | ENSG00000259820 | -0,243742319 | 5,061666574 | 1,0570148 | 0,314536898 |
| 8911 | ENSG00000259956 | 0,194466653  | 4,614918374 | 1,3420847 | 0,258497086 |
| 8912 | ENSG00000259959 | -1,76839625  | 4,903694912 | 11,001334 | 0,002992245 |
| 8913 | ENSG00000260032 | 0,412016718  | 8,962508587 | 10,304715 | 0,003856321 |
| 8914 | ENSG00000260075 | -0,029482463 | 4,203948628 | 0,0218355 | 0,883807079 |
| 8915 | ENSG00000260244 | 0,416021559  | 4,973662387 | 3,0760076 | 0,092708107 |
| 8916 | ENSG00000260314 | -0,846745563 | 6,294720232 | 8,8235904 | 0,006825957 |
| 8917 | ENSG00000260528 | -0,271164164 | 3,918934994 | 0,6837355 | 0,416758744 |
| 8918 | ENSG00000260565 | -0,051669823 | 5,396114161 | 0,0555171 | 0,815802354 |
| 8919 | ENSG00000260691 | -0,14696391  | 4,490264524 | 0,3536856 | 0,557811919 |
| 8920 | ENSG00000260916 | -0,029137881 | 4,61680866  | 0,0274564 | 0,869834168 |
| 8921 | ENSG00000261115 | -0,32878219  | 6,294449441 | 0,7866892 | 0,384239607 |
| 8922 | ENSG00000261326 | -0,112421867 | 3,942599265 | 0,2345308 | 0,632741928 |
| 8923 | ENSG00000261371 | -0,218098879 | 7,582833297 | 1,7835044 | 0,194708722 |
| 8924 | ENSG00000261377 | -0,597151367 | 3,872391022 | 16,624717 | 0,00067418  |
| 8925 | ENSG00000261499 | -0,169269712 | 4,309682216 | 0,5290185 | 0,474323445 |
| 8926 | ENSG00000261553 | 0,12476033   | 4,40471756  | 0,1231465 | 0,728825075 |
| 8927 | ENSG00000261556 | -0,138101368 | 4,542450634 | 0,4620099 | 0,503437566 |
| 8928 | ENSG00000261609 | -0,279831526 | 4,514478889 | 2,2815099 | 0,144476016 |
| 8929 | ENSG00000261701 | 3,128940537  | 6,287022331 | 6,8530199 | 0,01534754  |
| 8930 | ENSG00000261799 | -0,019783277 | 3,550463025 | 0,0149774 | 0,904005502 |
| 8931 | ENSG00000261824 | -0,141220713 | 5,05122578  | 1,0019717 | 0,327177776 |
| 8932 | ENSG00000262074 | 1,866575314  | 12,18400159 | 3,8964341 | 0,060458173 |
| 8933 | ENSG00000262655 | 0,617880847  | 5,674484072 | 3,4687285 | 0,075299964 |
| 8934 | ENSG00000262879 | 0,131251122  | 4,975062156 | 0,4549951 | 0,506663889 |
| 8935 | ENSG00000262902 | -0,375440157 | 3,756504089 | 1,6365196 | 0,213497945 |
| 8936 | ENSG00000263001 | 0,19650152   | 7,801961007 | 1,9003012 | 0,181196943 |
| 8937 | ENSG00000263002 | 0,013436455  | 3,991257342 | 0,0123566 | 0,935293032 |
| 8938 | ENSG00000263006 | 0,262777581  | 4,068592949 | 1,9997239 | 0,170657497 |
| 8939 | ENSG00000263155 | -0,566386932 | 7,163826535 | 4,5079036 | 0,044659946 |
| 8940 | ENSG00000263266 | 0,031491699  | 5,570791027 | 0,0160822 | 0,900183012 |
| 8941 | ENSG00000263465 | 0,298619772  | 4,990325868 | 9,5275569 | 0,008495915 |
| 8942 | ENSG00000263563 | -0,062140196 | 4,132540831 | 0,1446035 | 0,7152781   |
| 8943 | ENSG00000263740 | 0,484614535  | 13,60461997 | 1,0587792 | 0,314142213 |
| 8944 | ENSG00000263753 | -0,178688975 | 5,346623706 | 2,0914942 | 0,161500141 |
| 8945 | ENSG00000263934 | 1,215028891  | 12,3667957  | 2,6411949 | 0,117685001 |
| 8946 | ENSG00000263956 | 0,190072379  | 5,298093024 | 1,2325934 | 0,278320638 |
| 8947 | ENSG00000264112 | 0,199545718  | 5,04019561  | 0,4565418 | 0,505949377 |
| 8948 | ENSG00000264247 | -0,304860649 | 3,981579423 | 4,0688327 | 0,081589198 |
| 8949 | ENSG00000264281 | 0,147208786  | 6,854332791 | 0,4831819 | 0,49391429  |
| 8950 | ENSG00000264343 | 0,236770849  | 4,52467842  | 1,2775941 | 0,269940401 |
| 8951 | ENSG00000264364 | -0,20011343  | 6,90858988  | 1,4601513 | 0,239124347 |
| 8952 | ENSG00000264522 | 0,19896291   | 5,197324379 | 1,9434559 | 0,176527902 |
| 8953 | ENSG00000264538 | -0,186782811 | 4,092380453 | 1,0126759 | 0,324682388 |
| 8954 | ENSG00000264940 | 1,388616741  | 11,42138044 | 2,9575402 | 0,098842865 |
| 8955 | ENSG00000265107 | -0,460745486 | 5,794682802 | 1,5745483 | 0,222088272 |
| 8956 | ENSG00000265142 | -0,90880604  | 6,79260668  | 3,785378  | 0,063963016 |
| 8957 | ENSG00000265185 | 1,174934216  | 11,45593408 | 2,6398809 | 0,117771605 |
| 8958 | ENSG00000265241 | -0,059217888 | 5,115967728 | 0,3243483 | 0,667508206 |
| 8959 | ENSG00000265354 | -0,444043628 | 5,469535727 | 11,32136  | 0,002656042 |
| 8960 | ENSG00000265491 | 0,274369976  | 7,11699669  | 2,3542403 | 0,13851889  |
| 8961 | ENSG00000265735 | 0,500113132  | 13,43191651 | 1,166589  | 0,291245459 |
| 8962 | ENSG00000265808 | 0,10880154   | 6,395486743 | 0,5211378 | 0,477594387 |
| 8963 | ENSG00000265817 | -0,063536246 | 3,55337215  | 0,1011446 | 0,786688985 |
| 8964 | ENSG00000265972 | 0,180433205  | 10,2357891  | 0,76577   | 0,390500905 |
| 8965 | ENSG00000266019 | 0,002956754  | 4,981955427 | 8,585E-05 | 0,992686634 |
| 8966 | ENSG00000266028 | 0,189082456  | 5,753028572 | 0,6516814 | 0,42774206  |

|      |                 |              |             |           |             |
|------|-----------------|--------------|-------------|-----------|-------------|
| 8967 | ENSG00000266094 | 0,242891863  | 3,855179065 | 1,7022013 | 0,204842291 |
| 8968 | ENSG00000266173 | -0,120473155 | 3,698756644 | 0,303118  | 0,587216712 |
| 8969 | ENSG00000266338 | 0,237817206  | 5,465297128 | 2,1439632 | 0,156601437 |
| 8970 | ENSG00000266412 | -0,495245796 | 8,52555002  | 4,2140044 | 0,051580603 |
| 8971 | ENSG00000266472 | -0,390792217 | 5,561677214 | 5,1814487 | 0,032408469 |
| 8972 | ENSG00000266714 | 0,217492     | 5,228970596 | 0,7011289 | 0,410979598 |
| 8973 | ENSG00000267002 | 0,009061858  | 3,929567954 | 0,0020671 | 0,964126885 |
| 8974 | ENSG00000267023 | -0,369726865 | 3,571239023 | 4,4098839 | 0,05559713  |
| 8975 | ENSG00000267041 | 0,113462322  | 3,545074863 | 0,7326782 | 0,554145554 |
| 8976 | ENSG00000267519 | 0,771349067  | 4,738020572 | 3,6130217 | 0,069871055 |
| 8977 | ENSG00000267541 | -0,331877824 | 4,403697605 | 1,048319  | 0,31649203  |
| 8978 | ENSG00000267680 | -0,05900016  | 3,795727256 | 0,2560565 | 0,769106494 |
| 8979 | ENSG00000267784 | -0,06541569  | 6,625584058 | 0,0163888 | 0,899241428 |
| 8980 | ENSG00000268043 | 0,186486354  | 6,303249046 | 0,7184757 | 0,405336769 |
| 8981 | ENSG00000268205 | 0,15317894   | 5,467769371 | 0,7253043 | 0,403147608 |
| 8982 | ENSG00000268350 | 0,247719606  | 4,785888115 | 2,4468228 | 0,131352812 |
| 8983 | ENSG00000268362 | -0,39333263  | 4,719368967 | 2,0284647 | 0,167738712 |
| 8984 | ENSG00000269001 | 0,113706494  | 3,919595393 | 0,8116751 | 0,49401127  |
| 8985 | ENSG00000269028 | 0,547280337  | 7,090462332 | 1,4818215 | 0,235773031 |
| 8986 | ENSG00000269067 | 0,18917326   | 3,483265758 | 1,6683124 | 0,343971619 |
| 8987 | ENSG00000269293 | -0,176324284 | 3,874970455 | 1,1569059 | 0,314588845 |
| 8988 | ENSG00000269343 | -0,029077408 | 4,278949614 | 0,0298527 | 0,864329035 |
| 8989 | ENSG00000269378 | -0,018688869 | 6,333072    | 0,009083  | 0,924894048 |
| 8990 | ENSG00000269556 | 0,017149243  | 4,977413368 | 0,0102405 | 0,920268004 |
| 8991 | ENSG00000269713 | 0,259105855  | 5,578610132 | 2,0209191 | 0,168499109 |
| 8992 | ENSG00000269821 | -0,296181301 | 6,477246645 | 0,7510801 | 0,395042612 |
| 8993 | ENSG00000269893 | 0,239156369  | 4,373627267 | 1,1648358 | 0,291599554 |
| 8994 | ENSG00000269929 | -0,120121026 | 3,835778269 | 0,5107663 | 0,486398614 |
| 8995 | ENSG00000270025 | 0,104334507  | 4,280415048 | 0,2645138 | 0,61191881  |
| 8996 | ENSG00000270231 | 0,240181635  | 5,825786408 | 1,6427629 | 0,212655796 |
| 8997 | ENSG00000270629 | 0,328164228  | 6,314764973 | 2,3277523 | 0,140653935 |
| 8998 | ENSG00000270647 | -0,047000643 | 5,941238128 | 0,1135544 | 0,73916446  |
| 8999 | ENSG00000270872 | 0,261689024  | 3,707950577 | 1,1443529 | 0,295779378 |
| 9000 | ENSG00000271121 | -0,078062733 | 4,533134511 | 0,1739966 | 0,680433105 |
| 9001 | ENSG00000271204 | -0,16315817  | 3,331477047 | 0,3243238 | 0,574514453 |
| 9002 | ENSG00000271254 | 0,491783571  | 5,354660442 | 3,2945759 | 0,082508366 |
| 9003 | ENSG00000271394 | 0,30976526   | 7,074742448 | 0,9110801 | 0,349705173 |
| 9004 | ENSG00000271401 | -0,344063768 | 4,722840737 | 0,7729353 | 0,388359703 |
| 9005 | ENSG00000271425 | 0,319006234  | 6,127020979 | 3,3028883 | 0,082146787 |
| 9006 | ENSG00000271533 | -0,026446639 | 5,35495687  | 0,013057  | 0,910012638 |
| 9007 | ENSG00000271601 | 0,399239668  | 4,917731469 | 5,76876   | 0,024742621 |
| 9008 | ENSG00000271952 | -0,068128145 | 4,708012584 | 0,0445102 | 0,834756255 |
| 9009 | ENSG00000272047 | -0,163069764 | 4,841707344 | 0,7673958 | 0,390037582 |
| 9010 | ENSG00000272055 | 0,50433169   | 3,929490561 | 2,1445002 | 0,156551772 |
| 9011 | ENSG00000272150 | 0,275658427  | 4,412944869 | 2,9387516 | 0,099858519 |
| 9012 | ENSG00000272168 | 0,345327239  | 3,643932661 | 1,3304636 | 0,260511845 |
| 9013 | ENSG00000272316 | 0,106807547  | 3,713380169 | 0,3560949 | 0,556483689 |
| 9014 | ENSG00000272335 | -0,027328307 | 3,63284611  | 0,0453208 | 0,906498601 |
| 9015 | ENSG00000272391 | 0,117840604  | 4,636093419 | 0,2264545 | 0,638632529 |
| 9016 | ENSG00000272419 | 0,021493439  | 3,815104656 | 0,0150099 | 0,903550464 |
| 9017 | ENSG00000272602 | -0,127578278 | 4,108421768 | 0,6802184 | 0,417942471 |
| 9018 | ENSG00000272886 | -0,085196824 | 5,08981325  | 0,737409  | 0,399280059 |
| 9019 | ENSG00000272888 | -0,198056045 | 5,645986187 | 1,1638548 | 0,291797917 |
| 9020 | ENSG00000273015 | -0,090216029 | 4,950818946 | 0,3269855 | 0,572959442 |
| 9021 | ENSG00000273018 | -0,084583162 | 3,560967194 | 0,1450883 | 0,706752712 |
| 9022 | ENSG00000273033 | 0,173261724  | 3,843752187 | 0,7354083 | 0,399940986 |
| 9023 | ENSG00000273136 | 0,316489458  | 5,892169681 | 1,9782993 | 0,172873457 |
| 9024 | ENSG00000273319 | -0,22326832  | 3,955202372 | 0,5759433 | 0,455577148 |
| 9025 | ENSG00000273559 | -0,067213207 | 3,982994764 | 0,3236114 | 0,679449776 |

|      |                 |              |             |           |             |
|------|-----------------|--------------|-------------|-----------|-------------|
| 9026 | ENSG00000273590 | -0,224942016 | 4,097750118 | 3,0683533 | 0,178116067 |
| 9027 | ENSG00000273611 | -0,095535431 | 4,043873352 | 0,2988396 | 0,642496369 |
| 9028 | ENSG00000273654 | -0,204788976 | 4,348011411 | 0,8804959 | 0,357768958 |
| 9029 | ENSG00000273748 | -0,077909464 | 3,708483259 | 0,0963892 | 0,758988975 |
| 9030 | ENSG00000273749 | 0,18452893   | 5,783633598 | 0,9626311 | 0,336684127 |
| 9031 | ENSG00000273768 | 0,625159567  | 10,07459488 | 1,1867414 | 0,287216218 |
| 9032 | ENSG00000273841 | -0,364191352 | 4,904781645 | 2,2991012 | 0,143007617 |
| 9033 | ENSG00000274070 | -0,431457878 | 4,740400451 | 1,4564137 | 0,239708492 |
| 9034 | ENSG00000274211 | 0,216457308  | 4,545471953 | 1,3721491 | 0,253377698 |
| 9035 | ENSG00000274265 | -0,118636694 | 5,280525192 | 0,7304162 | 0,401497966 |
| 9036 | ENSG00000274333 | -0,471578499 | 4,379270082 | 2,1101165 | 0,15977021  |
| 9037 | ENSG00000274349 | -0,319447846 | 4,682707914 | 1,9599891 | 0,174795067 |
| 9038 | ENSG00000274487 | -0,072739834 | 4,674882859 | 0,1386039 | 0,713064743 |
| 9039 | ENSG00000274523 | 0,050324153  | 4,898849684 | 0,0856846 | 0,772348487 |
| 9040 | ENSG00000274615 | -0,012740691 | 4,64355033  | 0,003935  | 0,950521317 |
| 9041 | ENSG00000274642 | -0,373581339 | 6,834149395 | 2,0610422 | 0,164503097 |
| 9042 | ENSG00000275023 | 0,238392165  | 6,235068764 | 1,2248873 | 0,279789923 |
| 9043 | ENSG00000275052 | 0,230429287  | 6,157714643 | 2,0601121 | 0,164594418 |
| 9044 | ENSG00000275066 | 0,172575609  | 5,370720489 | 2,1804804 | 0,153220306 |
| 9045 | ENSG00000275131 | -0,142723065 | 9,615168558 | 0,2458025 | 0,624727779 |
| 9046 | ENSG00000275325 | -0,323889509 | 3,832381154 | 5,3794228 | 0,06586946  |
| 9047 | ENSG00000275405 | 0,722592851  | 12,45320956 | 1,4072804 | 0,24756015  |
| 9048 | ENSG00000275700 | 0,088637186  | 4,603129107 | 0,561026  | 0,538012544 |
| 9049 | ENSG00000275832 | 0,007822535  | 5,128876779 | 0,0011699 | 0,973007955 |
| 9050 | ENSG00000275835 | -0,013614648 | 4,604197408 | 0,0157141 | 0,901322145 |
| 9051 | ENSG00000275895 | -0,207297685 | 5,524472509 | 1,8047927 | 0,19217668  |
| 9052 | ENSG00000275993 | 1,297238427  | 5,012126002 | 11,618426 | 0,002396117 |
| 9053 | ENSG00000276023 | 0,038684658  | 3,900294496 | 0,0612197 | 0,868662622 |
| 9054 | ENSG00000276077 | -0,521342199 | 3,774206174 | 2,3140466 | 0,141774046 |
| 9055 | ENSG00000276141 | 0,03097387   | 3,998122532 | 0,0442406 | 0,837487837 |
| 9056 | ENSG00000276168 | 0,517211164  | 15,11203125 | 0,9414528 | 0,341949589 |
| 9057 | ENSG00000276203 | -0,121135522 | 3,760251415 | 0,1683018 | 0,685403475 |
| 9058 | ENSG00000276234 | 0,011974283  | 4,236158776 | 0,0177597 | 0,94469145  |
| 9059 | ENSG00000276291 | -0,158982991 | 4,213592873 | 0,8905468 | 0,35509002  |
| 9060 | ENSG00000276293 | 0,197065198  | 6,070936716 | 1,8306183 | 0,18911686  |
| 9061 | ENSG00000276386 | -0,983051973 | 4,642279087 | 5,6056902 | 0,026645462 |
| 9062 | ENSG00000276550 | -0,568808816 | 6,925313593 | 4,5537965 | 0,043676878 |
| 9063 | ENSG00000276966 | 0,394138528  | 5,139212315 | 1,3345558 | 0,259800059 |
| 9064 | ENSG00000276975 | 0,757176559  | 4,201924422 | 9,5764297 | 0,005093751 |
| 9065 | ENSG00000277053 | 0,220749813  | 7,606939441 | 2,2700478 | 0,145395551 |
| 9066 | ENSG00000277067 | -0,489490691 | 4,117598911 | 2,0914717 | 0,161548759 |
| 9067 | ENSG00000277072 | -0,157863146 | 4,17557766  | 0,5822604 | 0,453146177 |
| 9068 | ENSG00000277157 | 0,177348045  | 3,558044779 | 0,2038024 | 0,655876502 |
| 9069 | ENSG00000277406 | 0,171130926  | 4,201130249 | 1,1324853 | 0,298237939 |
| 9070 | ENSG00000277443 | 0,427157537  | 5,930262108 | 2,992808  | 0,096968616 |
| 9071 | ENSG00000277701 | 0,791819528  | 3,771123629 | 10,544521 | 0,003538138 |
| 9072 | ENSG00000277734 | -1,387849805 | 4,935358605 | 67,11875  | 2,74217E-08 |
| 9073 | ENSG00000277778 | -0,358904475 | 5,060843073 | 1,9209748 | 0,178977054 |
| 9074 | ENSG00000277791 | -0,490822779 | 5,600287437 | 8,239357  | 0,008619002 |
| 9075 | ENSG00000277918 | 0,657233461  | 10,27196656 | 1,2820868 | 0,269122046 |
| 9076 | ENSG00000277991 | -0,576709382 | 4,043749749 | 3,1787317 | 0,087743265 |
| 9077 | ENSG00000278053 | -0,134943021 | 4,726062218 | 1,9027716 | 0,282292461 |
| 9078 | ENSG00000278129 | 0,07215275   | 3,840958008 | 0,0989107 | 0,755962149 |
| 9079 | ENSG00000278259 | -0,2684058   | 4,02277712  | 2,302515  | 0,142724722 |
| 9080 | ENSG00000278311 | -0,031643114 | 5,892082055 | 0,1239953 | 0,797036859 |
| 9081 | ENSG00000278318 | 0,064428724  | 3,527200159 | 0,2617801 | 0,741545415 |
| 9082 | ENSG00000278540 | -0,476306768 | 5,922638707 | 3,6563378 | 0,068329698 |
| 9083 | ENSG00000278730 | -0,364893677 | 4,446400837 | 5,0866024 | 0,03387989  |
| 9084 | ENSG00000278771 | 0,516749489  | 11,3741666  | 1,3217219 | 0,262040851 |

|      |                 |              |             |           |             |
|------|-----------------|--------------|-------------|-----------|-------------|
| 9085 | ENSG00000278845 | -0,182054645 | 4,569482135 | 2,5908289 | 0,197743437 |
| 9086 | ENSG00000278931 | 0,099659465  | 3,570431061 | 0,1878894 | 0,668697821 |
| 9087 | ENSG00000278974 | -0,542168699 | 3,831414808 | 13,424563 | 0,003756218 |
| 9088 | ENSG00000279159 | -0,162149465 | 4,763286323 | 0,4749028 | 0,497600688 |
| 9089 | ENSG00000279166 | -0,255850672 | 4,181106197 | 1,0820777 | 0,30899315  |
| 9090 | ENSG00000279170 | -0,005774152 | 3,862122411 | 0,0021843 | 0,979273552 |
| 9091 | ENSG00000279289 | -0,22225384  | 3,598863025 | 0,9363907 | 0,34322525  |
| 9092 | ENSG00000279453 | -0,088801793 | 3,677307342 | 0,3593318 | 0,69119521  |
| 9093 | ENSG00000279457 | 0,046895779  | 4,856858943 | 0,0582627 | 0,811391781 |
| 9094 | ENSG00000279483 | 0,111315091  | 7,485924189 | 0,2822793 | 0,600280437 |
| 9095 | ENSG00000279598 | -0,159700883 | 4,242344466 | 0,2148482 | 0,647329083 |
| 9096 | ENSG00000279662 | -0,108382179 | 3,392270268 | 0,1601377 | 0,692704419 |
| 9097 | ENSG00000279688 | -0,824818391 | 3,766555074 | 6,1456657 | 0,02089752  |
| 9098 | ENSG00000279800 | 0,030235207  | 4,96326371  | 0,0366211 | 0,849909685 |
| 9099 | ENSG00000280077 | -0,452275689 | 3,945231341 | 2,692039  | 0,11439059  |
| 9100 | ENSG00000280109 | -0,081362391 | 3,726767937 | 0,0879898 | 0,769397732 |
| 9101 | ENSG00000280128 | -0,154483737 | 3,953485086 | 0,699373  | 0,411557432 |
| 9102 | ENSG00000280138 | 0,092897085  | 4,21888037  | 0,064178  | 0,802250088 |
| 9103 | ENSG00000280219 | 0,112061884  | 4,480264392 | 0,107933  | 0,745467817 |
| 9104 | ENSG00000280339 | 0,586608566  | 3,873144139 | 4,8714744 | 0,037503092 |
| 9105 | ENSG00000280347 | -0,031411884 | 3,61964722  | 0,027134  | 0,87059344  |
| 9106 | ENSG00000280383 | -0,252094744 | 3,46922408  | 0,6915234 | 0,414155841 |
| 9107 | ENSG00000280385 | -0,202974445 | 3,890538877 | 0,6902931 | 0,414565388 |
| 9108 | ENSG00000280433 | -0,012206359 | 4,157331059 | 0,0122181 | 0,926561834 |
| 9109 | ENSG00000280614 | 2,659485189  | 8,901405546 | 4,252544  | 0,05060749  |
| 9110 | ENSG00000280739 | 0,10895102   | 3,970744931 | 0,276713  | 0,603875168 |
| 9111 | ENSG00000280800 | 2,558184452  | 8,673835352 | 3,3460194 | 0,08029964  |
| 9112 | ENSG00000281026 | -0,241722703 | 4,932537614 | 1,0321319 | 0,320176048 |
| 9113 | ENSG00000281181 | 2,145508881  | 11,77398385 | 1,6403647 | 0,212978791 |
| 9114 | ENSG00000281183 | -0,207779555 | 3,70926319  | 0,5755325 | 0,45573597  |
| 9115 | ENSG00000281195 | -0,161376478 | 3,770967882 | 0,7212917 | 0,404431808 |
| 9116 | ENSG00000281344 | 0,592530057  | 4,129624694 | 1,0823104 | 0,308942303 |
| 9117 | ENSG00000281383 | 2,289596039  | 8,442452301 | 2,4072452 | 0,134361029 |
| 9118 | ENSG00000281649 | 0,163859291  | 5,595077953 | 1,7252864 | 0,201859669 |
| 9119 | ENSG00000282458 | -0,372407064 | 4,629715178 | 1,7200899 | 0,202560987 |
| 9120 | ENSG00000282826 | 0,021649659  | 4,11586284  | 0,0172093 | 0,896764917 |
| 9121 | ENSG00000282917 | -2,596383002 | 5,939666868 | 21,475155 | 0,000114578 |
| 9122 | ENSG00000283041 | 0,258147379  | 7,626581552 | 1,8429959 | 0,187708432 |
| 9123 | ENSG00000283196 | -0,055722451 | 3,745299858 | 0,0604861 | 0,807900253 |
| 9124 | ENSG00000283498 | 0,341614926  | 5,22435852  | 1,0462515 | 0,316959335 |
| 9125 | ENSG00000283674 | 0,204083244  | 4,173358268 | 0,6929838 | 0,413670528 |
| 9126 | ENSG00000284024 | -0,017156377 | 3,707710658 | 0,0322867 | 0,930044876 |
| 9127 | ENSG00000284052 | 0,094635137  | 3,379700113 | 0,1644995 | 0,688777367 |
| 9128 | ENSG00000284612 | -0,680893109 | 5,181751904 | 4,2095487 | 0,051694466 |
| 9129 | ENSG00000285410 | -0,0932429   | 3,844369528 | 0,2908316 | 0,609811816 |
| 9130 | ENSG00000285437 | -0,418105261 | 4,686164346 | 1,6083016 | 0,217356752 |
| 9131 | ENSG00000285756 | 0,401597323  | 4,023072089 | 1,5607731 | 0,224056491 |
| 9132 | ENSG00000285967 | -0,171165134 | 4,328623497 | 0,9405008 | 0,342188989 |
| 9133 | ENSG00000286062 | -0,126733026 | 5,528864129 | 0,1121298 | 0,740752218 |
| 9134 | ENSG00000286071 | -0,606720942 | 5,337440498 | 2,4174909 | 0,133574508 |
| 9135 | ENSG00000286156 | -0,012906915 | 3,713355099 | 0,0058618 | 0,992316825 |
| 9136 | ENSG00000286219 | 0,156250491  | 5,014314625 | 0,5594946 | 0,462007533 |
| 9137 | ENSG00000286619 | -1,39693761  | 4,558728029 | 9,1791447 | 0,005938302 |
| 9138 | ENSG00000287134 | -0,666386286 | 3,914658903 | 7,0092562 | 0,014355734 |
| 9139 | ENSG00000287280 | -0,398794394 | 3,764650564 | 1,2942056 | 0,266930673 |
| 9140 | ENSG00000287299 | -0,024380776 | 3,500052529 | 0,0176496 | 0,895460329 |
| 9141 | ENSG00000287315 | 0,112648824  | 3,866237235 | 0,0810744 | 0,778382318 |
| 9142 | ENSG00000287891 | -1,3833728   | 5,086343749 | 8,931342  | 0,006542433 |
| 9143 | ENSG00000288066 | 0,246353424  | 3,983923778 | 2,3186534 | 0,141396368 |

| <b>FDR</b> | <b>Gene name</b> | <b>Gene biotype</b> |
|------------|------------------|---------------------|
| 0,7924243  | DPM1             | protein_coding      |
| 0,7444016  | SCYL3            | protein_coding      |
| 0,0606893  | CFH              | protein_coding      |
| 0,9045866  | FUCA2            | protein_coding      |
| 0,9767278  | GCLC             | protein_coding      |
| 0,5829929  | NFYA             | protein_coding      |
| 0,8617303  | NIPAL3           | protein_coding      |
| 0,9112805  | LAS1L            | protein_coding      |
| 0,5248895  | ENPP4            | protein_coding      |
| 0,7440219  | ANKIB1           | protein_coding      |
| 0,9621856  | KRIT1            | protein_coding      |
| 0,1800952  | LAP3             | protein_coding      |
| 0,9081173  | CD99             | protein_coding      |
| 0,4879925  | LASP1            | protein_coding      |
| 0,958712   | SNX11            | protein_coding      |
| 0,7797349  | TMEM176A         | protein_coding      |
| 0,9928407  | M6PR             | protein_coding      |
| 0,8622295  | KLHL13           | protein_coding      |
| 0,887319   | ICA1             | protein_coding      |
| 0,9544158  | ALS2             | protein_coding      |
| 0,9840915  | CASP10           | protein_coding      |
| 0,7558125  | CFLAR            | protein_coding      |
| 0,8930787  | TFPI             | protein_coding      |
| 0,4151093  | NDUFAF7          | protein_coding      |
| 0,8189129  | RBM5             | protein_coding      |
| 0,2318378  | SLC7A2           | protein_coding      |
| 0,9773277  | ARF5             | protein_coding      |
| 0,5558351  | POLDIP2          | protein_coding      |
| 0,6766513  | PLXND1           | protein_coding      |
| 0,1431468  | AK2              | protein_coding      |
| 0,6180429  | FKBP4            | protein_coding      |
| 0,7230802  | KDM1A            | protein_coding      |
| 0,611428   | RBM6             | protein_coding      |
| 0,764019   | RECQL            | protein_coding      |
| 0,6648483  | VPS50            | protein_coding      |
| 0,0473388  | NDUFAB1          | protein_coding      |
| 0,997931   | PDK4             | protein_coding      |
| 0,7200284  | SLC25A13         | protein_coding      |
| 0,2354584  | ST7              | protein_coding      |
| 0,8578793  | CDC27            | protein_coding      |
| 0,1974243  | HCCS             | protein_coding      |
| 0,4818782  | UPF1             | protein_coding      |
| 0,0168003  | SKAP2            | protein_coding      |
| 0,8255291  | SLC25A5          | protein_coding      |
| 0,3126419  | MCUB             | protein_coding      |
| 0,6463814  | POLR2J           | protein_coding      |
| 0,9928407  | DHX33            | protein_coding      |
| 0,3522293  | MEOX1            | protein_coding      |
| 0,9644268  | THSD7A           | protein_coding      |
| 0,8500846  | LIG3             | protein_coding      |
| 0,2866571  | RPAP3            | protein_coding      |
| 0,5024248  | ACSM3            | protein_coding      |
| 0,4045325  | CIAPIN1          | protein_coding      |
| 0,0639504  | COPZ2            | protein_coding      |
| 0,8992483  | PRKAR2B          | protein_coding      |
| 0,654521   | MSL3             | protein_coding      |
| 0,9484395  | CREBBP           | protein_coding      |

|           |           |                |
|-----------|-----------|----------------|
| 0,9908419 | GCFC2     | protein_coding |
| 0,768388  | CROT      | protein_coding |
| 0,933129  | ABCB4     | protein_coding |
| 0,4509993 | KMT2E     | protein_coding |
| 0,7309867 | IBTK      | protein_coding |
| 0,2430128 | ZNF195    | protein_coding |
| 0,9628671 | MYCBP2    | protein_coding |
| 0,9998478 | FBXL3     | protein_coding |
| 0,9233889 | PDK2      | protein_coding |
| 0,2948143 | ITGA3     | protein_coding |
| 0,7763012 | ZFX       | protein_coding |
| 0,7390284 | LAMP2     | protein_coding |
| 0,4535882 | GDE1      | protein_coding |
| 0,115935  | TMEM98    | protein_coding |
| 0,8525767 | AP2B1     | protein_coding |
| 0,6574161 | ZNF263    | protein_coding |
| 0,6624016 | SPATA20   | protein_coding |
| 0,8440006 | TNFRSF12A | protein_coding |
| 0,6999614 | RALA      | protein_coding |
| 0,949756  | KDM7A     | protein_coding |
| 0,9899513 | ETV1      | protein_coding |
| 0,8238032 | AGK       | protein_coding |
| 0,7954765 | PHTF2     | protein_coding |
| 0,5336185 | FARP2     | protein_coding |
| 0,6947291 | IFRD1     | protein_coding |
| 0,7318327 | COX10     | protein_coding |
| 0,995098  | PAF1      | protein_coding |
| 0,6613295 | VPS41     | protein_coding |
| 0,6440403 | ELAC2     | protein_coding |
| 0,8800304 | PNPLA4    | protein_coding |
| 0,7639032 | ADIPOR2   | protein_coding |
| 0,6865358 | PROM1     | protein_coding |
| 0,9707919 | PAFAH1B1  | protein_coding |
| 0,995098  | KIAA0100  | protein_coding |
| 0,8851105 | GAS7      | protein_coding |
| 0,6898216 | ST7L      | protein_coding |
| 0,9450135 | LUC7L     | protein_coding |
| 0,3202177 | SELE      | protein_coding |
| 0,5364552 | DNAJC11   | protein_coding |
| 0,9296784 | MYLIP     | protein_coding |
| 0,6658884 | PSMB1     | protein_coding |
| 0,7162623 | JARID2    | protein_coding |
| 0,9925374 | CDKL5     | protein_coding |
| 0,9417097 | NADK      | protein_coding |
| 0,2104415 | CYTH3     | protein_coding |
| 0,7571978 | ADAM22    | protein_coding |
| 0,4219373 | SYPL1     | protein_coding |
| 0,6159171 | SPAG9     | protein_coding |
| 0,1951241 | AASS      | protein_coding |
| 0,9081173 | MGST1     | protein_coding |
| 0,9669517 | CRY1      | protein_coding |
| 0,3872426 | NFIX      | protein_coding |
| 0,8810791 | ST3GAL1   | protein_coding |
| 0,9919804 | IL32      | protein_coding |
| 0,3309793 | PKD1      | protein_coding |
| 0,9439974 | MED24     | protein_coding |
| 0,8885864 | RHOBTB2   | protein_coding |
| 0,8269408 | HEATR5B   | protein_coding |
| 0,7296863 | SEC62     | protein_coding |

|           |           |                |
|-----------|-----------|----------------|
| 0,8189129 | RPS20     | protein_coding |
| 0,9917279 | CSDE1     | protein_coding |
| 0,8908494 | UBE3C     | protein_coding |
| 0,6318488 | REV3L     | protein_coding |
| 0,9645423 | FAM76A    | protein_coding |
| 0,5544626 | VTA1      | protein_coding |
| 0,4906652 | BAZ1B     | protein_coding |
| 0,9176584 | RANBP9    | protein_coding |
| 0,4160411 | SPRTN     | protein_coding |
| 0,6053522 | EEF1AKNMT | protein_coding |
| 0,9296784 | DYRK4     | protein_coding |
| 0,8304235 | ZNF207    | protein_coding |
| 0,3607643 | UQCRC1    | protein_coding |
| 0,784306  | STARD3NL  | protein_coding |
| 0,0868691 | CD9       | protein_coding |
| 0,5095965 | HHATL     | protein_coding |
| 0,5510619 | NCAPD2    | protein_coding |
| 0,9632674 | SEMA3G    | protein_coding |
| 0,4307688 | NISCH     | protein_coding |
| 0,696332  | STAB1     | protein_coding |
| 0,472118  | IDS       | protein_coding |
| 0,7230802 | CD4       | protein_coding |
| 0,9463209 | SCMH1     | protein_coding |
| 0,9496064 | FYN       | protein_coding |
| 0,881423  | HIVEP2    | protein_coding |
| 0,7201269 | ELOA      | protein_coding |
| 0,9762117 | CLCN6     | protein_coding |
| 0,4344705 | MRC2      | protein_coding |
| 0,9925374 | TSPAN9    | protein_coding |
| 0,8318664 | BTBD7     | protein_coding |
| 0,9907221 | ABHD5     | protein_coding |
| 0,3339605 | ANOS1     | protein_coding |
| 0,738122  | AKAP8L    | protein_coding |
| 0,435547  | MBTD1     | protein_coding |
| 0,9781971 | UTP18     | protein_coding |
| 0,2819771 | RNF216    | protein_coding |
| 0,5919274 | TTC19     | protein_coding |
| 0,8561515 | PTBP1     | protein_coding |
| 0,3049645 | SYT7      | protein_coding |
| 0,860343  | LARS2     | protein_coding |
| 0,5964345 | PIK3C2A   | protein_coding |
| 0,5998801 | RABGAP1   | protein_coding |
| 0,9194718 | DCN       | protein_coding |
| 0,7296863 | PPP5C     | protein_coding |
| 0,8721281 | CEP68     | protein_coding |
| 0,7984578 | MAP4K3    | protein_coding |
| 0,645515  | TMEM159   | protein_coding |
| 0,7444016 | BRCA1     | protein_coding |
| 0,79362   | ERCC1     | protein_coding |
| 0,9450135 | SEMA3B    | protein_coding |
| 0,8922683 | MBTPS2    | protein_coding |
| 0,9233889 | EXTL3     | protein_coding |
| 0,892596  | ELOVL5    | protein_coding |
| 0,8801863 | KDM5D     | protein_coding |
| 0,9450135 | CALCOCO1  | protein_coding |
| 0,6785825 | UBR7      | protein_coding |
| 0,7942035 | MAP4K5    | protein_coding |
| 0,4562339 | EHD3      | protein_coding |
| 0,9142106 | PSMC4     | protein_coding |

|           |          |                |
|-----------|----------|----------------|
| 0,3770345 | MAN2B2   | protein_coding |
| 0,904174  | SLC25A39 | protein_coding |
| 0,9781971 | MVP      | protein_coding |
| 0,6173428 | NUB1     | protein_coding |
| 0,9170247 | PGM3     | protein_coding |
| 0,9792506 | CLK1     | protein_coding |
| 0,9978259 | POLR3B   | protein_coding |
| 0,8255851 | ANGEL1   | protein_coding |
| 0,7246609 | RNF14    | protein_coding |
| 0,8463447 | HEBP1    | protein_coding |
| 0,9512091 | GPRC5A   | protein_coding |
| 0,9628671 | UFL1     | protein_coding |
| 0,8992483 | CAPN1    | protein_coding |
| 0,4412714 | MDH1     | protein_coding |
| 0,6864699 | SLC30A9  | protein_coding |
| 0,7452363 | COX15    | protein_coding |
| 0,7230802 | YAF2     | protein_coding |
| 0,6160654 | ZMYND11  | protein_coding |
| 0,623981  | BID      | protein_coding |
| 0,9194718 | MATR3    | protein_coding |
| 0,9039795 | RGPD5    | protein_coding |
| 0,9082846 | NUDCD3   | protein_coding |
| 0,8023631 | GLT8D1   | protein_coding |
| 0,9237476 | ATP2C1   | protein_coding |
| 0,4835164 | RALBP1   | protein_coding |
| 0,4467509 | RUFY3    | protein_coding |
| 0,53819   | WWTR1    | protein_coding |
| 0,9898099 | AGPS     | protein_coding |
| 0,7382254 | CXorf56  | protein_coding |
| 0,5622112 | ATP1A2   | protein_coding |
| 0,9914435 | TTC27    | protein_coding |
| 0,7418156 | PHLDB1   | protein_coding |
| 0,4141191 | PRDM11   | protein_coding |
| 0,3888096 | CD74     | protein_coding |
| 0,8189129 | HGF      | protein_coding |
| 0,5943942 | ZRANB1   | protein_coding |
| 0,6613295 | MNAT1    | protein_coding |
| 0,71754   | SAMD4A   | protein_coding |
| 0,9738181 | MRE11    | protein_coding |
| 0,599779  | SERPINB1 | protein_coding |
| 0,7842247 | SPAST    | protein_coding |
| 0,861259  | AQR      | protein_coding |
| 0,8500846 | FHL1     | protein_coding |
| 0,620901  | RTF2     | protein_coding |
| 0,77251   | SLC45A4  | protein_coding |
| 0,6607313 | RNF10    | protein_coding |
| 0,8829877 | ZDHHC6   | protein_coding |
| 0,6854132 | RNH1     | protein_coding |
| 0,7235397 | NDUFS1   | protein_coding |
| 0,7844757 | RB1CC1   | protein_coding |
| 0,7936863 | ERP44    | protein_coding |
| 0,3520154 | ALAS1    | protein_coding |
| 0,624851  | BIRC3    | protein_coding |
| 0,4413743 | AKAP11   | protein_coding |
| 0,9908419 | GLRX2    | protein_coding |
| 0,8847411 | SNAPC1   | protein_coding |
| 0,8930787 | DERA     | protein_coding |
| 0,3041449 | STRAP    | protein_coding |
| 0,9768456 | PLEKHO1  | protein_coding |



|           |           |                |
|-----------|-----------|----------------|
| 0,986868  | GCLM      | protein_coding |
| 0,895571  | UBR2      | protein_coding |
| 0,9778442 | EHD2      | protein_coding |
| 0,5563416 | CCDC28A   | protein_coding |
| 0,583756  | RRAGD     | protein_coding |
| 0,0757434 | HSF2      | protein_coding |
| 0,7162408 | PHF20     | protein_coding |
| 0,8155634 | NR1H3     | protein_coding |
| 0,626613  | SEC63     | protein_coding |
| 0,6896707 | KPNA6     | protein_coding |
| 0,42916   | VIM       | protein_coding |
| 0,6137496 | FAS       | protein_coding |
| 0,9899185 | CD44      | protein_coding |
| 0,7542355 | AGPAT4    | protein_coding |
| 0,1232731 | BTN3A1    | protein_coding |
| 0,9277595 | MIPEP     | protein_coding |
| 0,3792977 | PRKCH     | protein_coding |
| 0,38667   | IFNGR1    | protein_coding |
| 0,32001   | VRK2      | protein_coding |
| 0,6613295 | TNFRSF1B  | protein_coding |
| 0,7467854 | VEZT      | protein_coding |
| 0,8992483 | BRD9      | protein_coding |
| 0,3358222 | SNX1      | protein_coding |
| 0,9907221 | TBPL1     | protein_coding |
| 0,9533676 | BCLAF1    | protein_coding |
| 0,7842247 | SLC39A9   | protein_coding |
| 0,9842269 | ANK1      | protein_coding |
| 0,9358535 | RABEP1    | protein_coding |
| 0,8423623 | NUP160    | protein_coding |
| 0,9738194 | IKZF2     | protein_coding |
| 0,9194718 | GRN       | protein_coding |
| 0,691951  | FAM13B    | protein_coding |
| 0,7687197 | ARHGAP31  | protein_coding |
| 0,5082264 | SARS      | protein_coding |
| 0,9808899 | RANBP3    | protein_coding |
| 0,9794449 | ARID4A    | protein_coding |
| 0,5024248 | IFT88     | protein_coding |
| 0,7905225 | ZCCHC8    | protein_coding |
| 0,330331  | CHPF2     | protein_coding |
| 0,1412577 | LRRC7     | protein_coding |
| 0,8474324 | FUT8      | protein_coding |
| 0,9481776 | UBA6      | protein_coding |
| 0,1926389 | GAB2      | protein_coding |
| 0,6475905 | ATP6V0A1  | protein_coding |
| 0,6546449 | PIAS1     | protein_coding |
| 0,5976843 | SLC4A7    | protein_coding |
| 0,624851  | MAP2K3    | protein_coding |
| 0,8003414 | TMSB10    | protein_coding |
| 0,5626731 | RNF19A    | protein_coding |
| 0,6977704 | PEX3      | protein_coding |
| 0,9463928 | GABARAPL2 | protein_coding |
| 0,1589626 | MYOC      | protein_coding |
| 0,9181578 | SH3YL1    | protein_coding |
| 0,6900636 | FAM136A   | protein_coding |
| 0,9707377 | VCL       | protein_coding |
| 0,2048374 | DAPK2     | protein_coding |
| 0,8301309 | NSMAF     | protein_coding |
| 0,8436853 | ADSS      | protein_coding |
| 0,5263704 | TIMP2     | protein_coding |

|           |            |                |
|-----------|------------|----------------|
| 0,9644268 | RFC1       | protein_coding |
| 0,9410289 | TBC1D23    | protein_coding |
| 0,9645423 | CUL3       | protein_coding |
| 0,7558125 | MYOM2      | protein_coding |
| 0,9205351 | AC118549.1 | protein_coding |
| 0,4826313 | USP2       | protein_coding |
| 0,9054206 | NSUN2      | protein_coding |
| 0,6927966 | FBXO42     | protein_coding |
| 0,7968733 | MFAP3      | protein_coding |
| 0,654521  | PI4K2B     | protein_coding |
| 0,6720329 | BOD1L1     | protein_coding |
| 0,4237568 | MAT2B      | protein_coding |
| 0,4894579 | TLL1       | protein_coding |
| 0,7118106 | EDC4       | protein_coding |
| 0,997931  | TRIO       | protein_coding |
| 0,9900815 | VCAN       | protein_coding |
| 0,9953531 | CLEC16A    | protein_coding |
| 0,855954  | MSR1       | protein_coding |
| 0,6109628 | MTREX      | protein_coding |
| 0,8992483 | ZFYVE16    | protein_coding |
| 0,8131645 | RIPOR1     | protein_coding |
| 0,1093101 | C6         | protein_coding |
| 0,4032255 | RAI14      | protein_coding |
| 0,2945575 | PHLPP2     | protein_coding |
| 0,5062136 | STAU2      | protein_coding |
| 0,8786805 | INPP4A     | protein_coding |
| 0,6158337 | PSMA4      | protein_coding |
| 0,2841212 | LSG1       | protein_coding |
| 0,0639504 | TNC        | protein_coding |
| 0,7805908 | AIFM2      | protein_coding |
| 0,7258655 | SPATA7     | protein_coding |
| 0,9699064 | MED17      | protein_coding |
| 0,841851  | RETSAT     | protein_coding |
| 0,6543081 | AP2S1      | protein_coding |
| 0,9750933 | USH2A      | protein_coding |
| 0,853092  | DCUN1D1    | protein_coding |
| 0,7444016 | JADE2      | protein_coding |
| 0,9282881 | LCP2       | protein_coding |
| 0,3089259 | TRIT1      | protein_coding |
| 0,7161818 | ADRB1      | protein_coding |
| 0,2870346 | CUL7       | protein_coding |
| 0,7687197 | CTNNA1     | protein_coding |
| 0,9463209 | PHKA2      | protein_coding |
| 0,9925374 | CNTLN      | protein_coding |
| 0,0868691 | EPHA3      | protein_coding |
| 0,6882013 | HSPA5      | protein_coding |
| 0,8850351 | DSG2       | protein_coding |
| 0,605669  | OFD1       | protein_coding |
| 0,8563699 | GPM6B      | protein_coding |
| 0,7431973 | PREX2      | protein_coding |
| 0,702199  | WDR37      | protein_coding |
| 0,749866  | YTHDC2     | protein_coding |
| 0,6287358 | CTPS2      | protein_coding |
| 0,9933219 | ATP6V1H    | protein_coding |
| 0,6383874 | POLR2B     | protein_coding |
| 0,6797506 | FAM214A    | protein_coding |
| 0,4367004 | ARAP2      | protein_coding |
| 0,5140003 | TPR        | protein_coding |
| 0,0026674 | CP         | protein_coding |

|           |          |                |
|-----------|----------|----------------|
| 0,2332141 | KIAA0556 | protein_coding |
| 0,6651275 | XK       | protein_coding |
| 0,9693586 | ANO2     | protein_coding |
| 0,633922  | C12orf4  | protein_coding |
| 0,2104415 | SCML1    | protein_coding |
| 0,4894579 | WWC3     | protein_coding |
| 0,4008367 | MAP4     | protein_coding |
| 0,5573066 | GOPC     | protein_coding |
| 0,9730551 | USP28    | protein_coding |
| 0,7740102 | HDAC9    | protein_coding |
| 0,7318327 | CC2D2A   | protein_coding |
| 0,9256429 | RRM2B    | protein_coding |
| 0,9669517 | ZNF800   | protein_coding |
| 0,7740102 | SNX29    | protein_coding |
| 0,5707233 | LMO3     | protein_coding |
| 0,4750209 | MRPS10   | protein_coding |
| 0,7924243 | RSF1     | protein_coding |
| 0,8500846 | VPS13D   | protein_coding |
| 0,9621631 | CELF2    | protein_coding |
| 0,7639764 | FAM120A  | protein_coding |
| 0,8619772 | R3HDM1   | protein_coding |
| 0,6335222 | KITLG    | protein_coding |
| 0,8530643 | ERCC8    | protein_coding |
| 0,4724079 | H6PD     | protein_coding |
| 0,9808899 | VAMP3    | protein_coding |
| 0,0943087 | PER3     | protein_coding |
| 0,1326966 | LTBP1    | protein_coding |
| 0,8481719 | RCN1     | protein_coding |
| 0,7025012 | ELN      | protein_coding |
| 0,9154352 | ARID1B   | protein_coding |
| 0,8885864 | CLPTM1L  | protein_coding |
| 0,9781971 | NEDD4L   | protein_coding |
| 0,4840962 | HEXB     | protein_coding |
| 0,7213265 | PTCD2    | protein_coding |
| 0,7968733 | JKAMP    | protein_coding |
| 0,4260926 | DKK3     | protein_coding |
| 0,5268669 | NFE2L3   | protein_coding |
| 0,3515446 | MCUR1    | protein_coding |
| 0,5095965 | LIMA1    | protein_coding |
| 0,330331  | LETMD1   | protein_coding |
| 0,2945575 | MAPK9    | protein_coding |
| 0,624851  | FAM160A2 | protein_coding |
| 0,4161706 | HERPUD1  | protein_coding |
| 0,7253738 | PIK3CB   | protein_coding |
| 0,4061841 | HEBP2    | protein_coding |
| 0,4775021 | MPHOSPH9 | protein_coding |
| 0,9678404 | PLEKHA5  | protein_coding |
| 0,9439974 | SIKE1    | protein_coding |
| 0,8118149 | RRP12    | protein_coding |
| 0,7126143 | FNIP2    | protein_coding |
| 0,9364287 | MSMO1    | protein_coding |
| 0,9700303 | TTC17    | protein_coding |
| 0,7027821 | FOXN3    | protein_coding |
| 0,5704217 | AKR7A2   | protein_coding |
| 0,4775021 | MRTO4    | protein_coding |
| 0,9248086 | LAMA3    | protein_coding |
| 0,4916085 | AP5M1    | protein_coding |
| 0,9182782 | ANAPC4   | protein_coding |
| 0,5060008 | TRAPPC3  | protein_coding |

|           |          |                |
|-----------|----------|----------------|
| 0,7921707 | THRAP3   | protein_coding |
| 0,9761718 | PHPT1    | protein_coding |
| 0,4894579 | ARID4B   | protein_coding |
| 0,7820981 | SDCCAG8  | protein_coding |
| 0,998169  | KIF1B    | protein_coding |
| 0,7763012 | TBC1D22A | protein_coding |
| 0,4408807 | SYNE2    | protein_coding |
| 0,3094135 | ATP9A    | protein_coding |
| 0,8992483 | FAM168A  | protein_coding |
| 0,9327336 | GALC     | protein_coding |
| 0,6887681 | NOP58    | protein_coding |
| 0,9750933 | SZRD1    | protein_coding |
| 0,7954765 | KCNH2    | protein_coding |
| 0,6534387 | CUL1     | protein_coding |
| 0,9693586 | FAM114A2 | protein_coding |
| 0,7921707 | CYFIP2   | protein_coding |
| 0,9860501 | TAB2     | protein_coding |
| 0,9773277 | GINM1    | protein_coding |
| 0,5474737 | EIF2AK2  | protein_coding |
| 0,9925374 | USP36    | protein_coding |
| 0,9252971 | KMT2C    | protein_coding |
| 0,9967216 | PUM2     | protein_coding |
| 0,9510167 | MRPL43   | protein_coding |
| 0,4806087 | HPF1     | protein_coding |
| 0,9127443 | ZFR      | protein_coding |
| 0,9618453 | RC3H2    | protein_coding |
| 0,9914435 | TRAF3IP2 | protein_coding |
| 0,472118  | DCBLD2   | protein_coding |
| 0,8863637 | SOAT1    | protein_coding |
| 0,9082846 | PKP2     | protein_coding |
| 0,8550924 | GDI2     | protein_coding |
| 0,7444016 | ATG5     | protein_coding |
| 0,7885692 | PITHD1   | protein_coding |
| 0,9919804 | MTA3     | protein_coding |
| 0,9917279 | USP13    | protein_coding |
| 0,7057791 | ATP11B   | protein_coding |
| 0,673546  | CDK14    | protein_coding |
| 0,8463447 | SEC61A1  | protein_coding |
| 0,8322139 | PPP1R12A | protein_coding |
| 0,5587702 | CAMK2B   | protein_coding |
| 0,8969303 | POLR3E   | protein_coding |
| 0,517991  | ATP2B4   | protein_coding |
| 0,8682799 | RIOK2    | protein_coding |
| 0,6762366 | YIPF1    | protein_coding |
| 0,8901085 | NDC1     | protein_coding |
| 0,458152  | DGKG     | protein_coding |
| 0,2785577 | PARP12   | protein_coding |
| 0,1900988 | ALDH18A1 | protein_coding |
| 0,7081012 | TARBP1   | protein_coding |
| 0,1356666 | GATB     | protein_coding |
| 0,9951314 | MXD1     | protein_coding |
| 0,8575378 | CDK17    | protein_coding |
| 0,8992483 | SLC2A3   | protein_coding |
| 0,902171  | YBX3     | protein_coding |
| 0,6462349 | WNK1     | protein_coding |
| 0,8422988 | CCAR1    | protein_coding |
| 0,9587213 | SNRNP40  | protein_coding |
| 0,5773011 | QSER1    | protein_coding |
| 0,6563172 | MPC1     | protein_coding |

|           |          |                |
|-----------|----------|----------------|
| 0,6638064 | ACAA1    | protein_coding |
| 0,9766075 | BCAT1    | protein_coding |
| 0,9973946 | HDAC7    | protein_coding |
| 0,8238032 | NCKAP1   | protein_coding |
| 0,6476315 | MRPS35   | protein_coding |
| 0,9108829 | GUCY1B1  | protein_coding |
| 0,7611529 | SFSWAP   | protein_coding |
| 0,8545769 | MON2     | protein_coding |
| 0,8745989 | GPBP1    | protein_coding |
| 0,9310151 | DGAT2    | protein_coding |
| 0,7611529 | ZNF112   | protein_coding |
| 0,62553   | CS       | protein_coding |
| 0,9233889 | ELMO2    | protein_coding |
| 0,9817008 | WAPL     | protein_coding |
| 0,887319  | VMP1     | protein_coding |
| 0,7894641 | APPBP2   | protein_coding |
| 0,6776989 | EIF4B    | protein_coding |
| 0,6160654 | RPL18    | protein_coding |
| 0,7913218 | U2AF2    | protein_coding |
| 0,6766513 | EPN1     | protein_coding |
| 0,559444  | MED29    | protein_coding |
| 0,5269672 | ZNF275   | protein_coding |
| 0,6591127 | MTMR1    | protein_coding |
| 0,8427405 | GPC1     | protein_coding |
| 0,9464798 | HAGH     | protein_coding |
| 0,9183994 | RNF4     | protein_coding |
| 0,4827579 | LIMCH1   | protein_coding |
| 0,4724079 | INTS13   | protein_coding |
| 0,2778507 | TM7SF3   | protein_coding |
| 0,8575378 | CCN5     | protein_coding |
| 0,9481776 | ST3GAL6  | protein_coding |
| 0,3616153 | CDON     | protein_coding |
| 0,9703483 | TAF2     | protein_coding |
| 0,9233889 | HIPK2    | protein_coding |
| 0,7627705 | TNPO3    | protein_coding |
| 0,2061005 | CTSA     | protein_coding |
| 0,7961601 | SUGP2    | protein_coding |
| 0,6604792 | SLC12A2  | protein_coding |
| 0,902171  | SNX24    | protein_coding |
| 0,7500896 | CNN2     | protein_coding |
| 0,8530994 | DDX20    | protein_coding |
| 0,7558125 | BTBD1    | protein_coding |
| 0,1720115 | FAR2     | protein_coding |
| 0,9998538 | PMS1     | protein_coding |
| 0,6818653 | CALCRL   | protein_coding |
| 0,4767135 | TAF11    | protein_coding |
| 0,7393702 | ANKS1A   | protein_coding |
| 0,7880474 | AP3D1    | protein_coding |
| 0,8373584 | ZNF76    | protein_coding |
| 0,6607313 | UHRF1BP1 | protein_coding |
| 0,9484395 | GNAI3    | protein_coding |
| 0,615864  | IPO5     | protein_coding |
| 0,4835164 | OAT      | protein_coding |
| 0,685088  | WDR3     | protein_coding |
| 0,9997039 | PKN2     | protein_coding |
| 0,9391446 | TRAM2    | protein_coding |
| 0,9998478 | NTN1     | protein_coding |
| 0,9946475 | ANKRD44  | protein_coding |
| 0,3520154 | KARS     | protein_coding |

|           |          |                |
|-----------|----------|----------------|
| 0,9778442 | ADAT1    | protein_coding |
| 0,150677  | NDUFB4   | protein_coding |
| 0,771306  | SPEN     | protein_coding |
| 0,9994264 | MYLK     | protein_coding |
| 0,8021477 | ZC3H15   | protein_coding |
| 0,9894339 | MAP2K4   | protein_coding |
| 0,5267449 | SLK      | protein_coding |
| 0,7213265 | CYB5R4   | protein_coding |
| 0,9998538 | SEC61A2  | protein_coding |
| 0,4684539 | ASB1     | protein_coding |
| 0,1801696 | FAM107B  | protein_coding |
| 0,0132445 | ME1      | protein_coding |
| 0,0606893 | TBC1D1   | protein_coding |
| 0,9677725 | CDK13    | protein_coding |
| 0,1225394 | MTHFD2   | protein_coding |
| 0,875851  | SLC9A7   | protein_coding |
| 0,6473313 | FOXJ2    | protein_coding |
| 0,7219856 | YBX1     | protein_coding |
| 0,633922  | PPP2R5A  | protein_coding |
| 0,9919804 | ELAVL1   | protein_coding |
| 0,8189129 | TIE1     | protein_coding |
| 0,6988495 | DIP2B    | protein_coding |
| 0,9003006 | SMARCD1  | protein_coding |
| 0,6879654 | KDM4A    | protein_coding |
| 0,933129  | NFYC     | protein_coding |
| 0,9977992 | CD84     | protein_coding |
| 0,8992483 | ELOVL1   | protein_coding |
| 0,9953531 | ZBTB11   | protein_coding |
| 0,7420657 | ATXN3    | protein_coding |
| 0,9630144 | GOLGA5   | protein_coding |
| 0,4894579 | LRRC40   | protein_coding |
| 0,0336588 | ISOC1    | protein_coding |
| 0,9583708 | EML1     | protein_coding |
| 0,7740102 | TRMT11   | protein_coding |
| 0,9965259 | THUMPD1  | protein_coding |
| 0,9997651 | MSANTD3  | protein_coding |
| 0,8221205 | ATG2B    | protein_coding |
| 0,9962215 | ARFGEF1  | protein_coding |
| 0,5312481 | MTFR1    | protein_coding |
| 0,7025012 | FECH     | protein_coding |
| 0,9900815 | MYO9A    | protein_coding |
| 0,9538485 | DDX3Y    | protein_coding |
| 0,8131645 | PFKP     | protein_coding |
| 0,8318664 | IDI1     | protein_coding |
| 0,9127443 | SP100    | protein_coding |
| 0,5622112 | KLF6     | protein_coding |
| 0,8162707 | PLPP1    | protein_coding |
| 0,4161706 | NEO1     | protein_coding |
| 0,9074092 | TRAM1    | protein_coding |
| 0,9752796 | PHKA1    | protein_coding |
| 0,8440006 | TNFRSF1A | protein_coding |
| 0,4906292 | EVI5     | protein_coding |
| 0,5879554 | PKM      | protein_coding |
| 0,9578517 | DHX29    | protein_coding |
| 0,592905  | DNTTIP2  | protein_coding |
| 0,5175383 | METTTL2  | protein_coding |
| 0,9528743 | TP53BP1  | protein_coding |
| 0,1444307 | RRP15    | protein_coding |
| 0,7467854 | RHOA     | protein_coding |

|           |         |                |
|-----------|---------|----------------|
| 0,8425029 | DHX8    | protein_coding |
| 0,9847107 | ZFY     | protein_coding |
| 0,9700303 | IARS2   | protein_coding |
| 0,8721867 | NAV3    | protein_coding |
| 0,8318518 | IDH3G   | protein_coding |
| 0,7639764 | ROCK1   | protein_coding |
| 0,5880659 | CBFB    | protein_coding |
| 0,4545648 | PDK3    | protein_coding |
| 0,8554227 | HYAL2   | protein_coding |
| 0,9374881 | HDAC4   | protein_coding |
| 0,933129  | HEATR6  | protein_coding |
| 0,8545769 | MEF2A   | protein_coding |
| 0,4684923 | OTUD5   | protein_coding |
| 0,997931  | TFE3    | protein_coding |
| 0,8764046 | ACSL4   | protein_coding |
| 0,8851105 | INPP5A  | protein_coding |
| 0,855954  | GRIPAP1 | protein_coding |
| 0,3606951 | REEP1   | protein_coding |
| 0,7039013 | ATP11A  | protein_coding |
| 0,9142106 | POLR1A  | protein_coding |
| 0,8593223 | LAPTM4A | protein_coding |
| 0,8885864 | TTC7A   | protein_coding |
| 0,5953643 | IP6K2   | protein_coding |
| 0,9233889 | SRBD1   | protein_coding |
| 0,9998478 | KIF2A   | protein_coding |
| 0,7296863 | PSME4   | protein_coding |
| 0,6173428 | IFT80   | protein_coding |
| 0,2841212 | SIRT2   | protein_coding |
| 0,4750209 | ERLEC1  | protein_coding |
| 0,0757434 | PYGM    | protein_coding |
| 0,9854182 | MAST4   | protein_coding |
| 0,1763931 | ADGRF5  | protein_coding |
| 0,9003006 | NUP133  | protein_coding |
| 0,9781148 | NUCKS1  | protein_coding |
| 0,9997039 | VPS35   | protein_coding |
| 0,7965103 | DNAJA2  | protein_coding |
| 0,5688668 | ABCC9   | protein_coding |
| 0,8992483 | CLEC2D  | protein_coding |
| 0,5180247 | FUNDC1  | protein_coding |
| 0,8318518 | MAOB    | protein_coding |
| 0,7500896 | RORA    | protein_coding |
| 0,0349682 | TGFBR3  | protein_coding |
| 0,2354584 | ATP1B3  | protein_coding |
| 0,6689227 | NEDD4   | protein_coding |
| 0,8992483 | MAPK6   | protein_coding |
| 0,1125192 | GNB5    | protein_coding |
| 0,3792977 | RAB27A  | protein_coding |
| 0,7444016 | HDHD5   | protein_coding |
| 0,5474737 | UFD1    | protein_coding |
| 0,8472938 | LRP6    | protein_coding |
| 0,8148845 | PHRF1   | protein_coding |
| 0,8155634 | ELP1    | protein_coding |
| 0,7613174 | NUCB2   | protein_coding |
| 0,9536474 | PFN2    | protein_coding |
| 0,7444016 | PTPN3   | protein_coding |
| 0,7894641 | SPTB    | protein_coding |
| 0,8037001 | SLC44A1 | protein_coding |
| 0,7921707 | TMEM260 | protein_coding |
| 0,7752284 | SMG6    | protein_coding |

|           |          |                |
|-----------|----------|----------------|
| 0,8274546 | EXOC5    | protein_coding |
| 0,3881918 | CLTCL1   | protein_coding |
| 0,8917289 | FSTL3    | protein_coding |
| 0,7609122 | DGCR2    | protein_coding |
| 0,9746059 | ZXDC     | protein_coding |
| 0,4160411 | JMJD6    | protein_coding |
| 0,6173428 | POLB     | protein_coding |
| 0,9700303 | WIP1     | protein_coding |
| 0,8221205 | GBA2     | protein_coding |
| 0,9880046 | NDST1    | protein_coding |
| 0,2529607 | AP3M2    | protein_coding |
| 0,4627775 | PABPC1   | protein_coding |
| 0,7114715 | CFAP20   | protein_coding |
| 0,6888533 | CSNK2A2  | protein_coding |
| 0,2656432 | PTPN21   | protein_coding |
| 0,3829653 | EIF2B3   | protein_coding |
| 0,1712026 | CAMK2A   | protein_coding |
| 0,8255851 | TCOF1    | protein_coding |
| 0,8062191 | CDC42    | protein_coding |
| 0,8847101 | OSBPL3   | protein_coding |
| 0,3607643 | ATP2B1   | protein_coding |
| 0,8971058 | NCK2     | protein_coding |
| 0,9914435 | MAP4K4   | protein_coding |
| 0,9248086 | MGAT4A   | protein_coding |
| 0,986527  | RPL31    | protein_coding |
| 0,9172092 | WDR1     | protein_coding |
| 0,9282881 | SNX13    | protein_coding |
| 0,8915993 | ARHGAP10 | protein_coding |
| 0,7912354 | RPS6KA2  | protein_coding |
| 0,6403073 | ING3     | protein_coding |
| 0,2104415 | VASH1    | protein_coding |
| 0,7230802 | LMCD1    | protein_coding |
| 0,3653635 | BUD23    | protein_coding |
| 0,90504   | SEL1L    | protein_coding |
| 0,933129  | ATP6AP1  | protein_coding |
| 0,4806087 | TRIB2    | protein_coding |
| 0,5009178 | DAZAP1   | protein_coding |
| 0,9040068 | HLTF     | protein_coding |
| 0,9131236 | FAM50A   | protein_coding |
| 0,4748134 | CYBRD1   | protein_coding |
| 0,7762612 | CDH19    | protein_coding |
| 0,4732706 | PDCD2    | protein_coding |
| 0,7125689 | RDH11    | protein_coding |
| 0,855954  | PRKACA   | protein_coding |
| 0,9410184 | ACTN1    | protein_coding |
| 0,7444016 | ZFYVE26  | protein_coding |
| 0,998169  | EPN2     | protein_coding |
| 0,8930787 | PTPN18   | protein_coding |
| 0,6285359 | LIMS2    | protein_coding |
| 0,931978  | SPEG     | protein_coding |
| 0,7444016 | LNX1     | protein_coding |
| 0,3910224 | ALDH3A2  | protein_coding |
| 0,9410184 | TFRC     | protein_coding |
| 0,5358437 | SREBF1   | protein_coding |
| 0,6168923 | AFF4     | protein_coding |
| 0,6858794 | UBE2D1   | protein_coding |
| 0,7689375 | MPP5     | protein_coding |
| 0,3316892 | RHOBTB1  | protein_coding |
| 0,9312186 | SMC1A    | protein_coding |



|           |           |                      |
|-----------|-----------|----------------------|
| 0,6610925 | HSD17B10  | protein_coding       |
| 0,8031748 | MARK2     | protein_coding       |
| 0,90504   | CHFR      | protein_coding       |
| 0,4519396 | P4HA2     | protein_coding       |
| 0,289067  | FCGR2B    | protein_coding       |
| 0,6951729 | NFATC3    | protein_coding       |
| 0,7552965 | TRNT1     | protein_coding       |
| 0,7558125 | ACADVL    | protein_coding       |
| 0,9485776 | STK10     | protein_coding       |
| 0,3798831 | FBXW11    | protein_coding       |
| 0,3217493 | EVC       | protein_coding       |
| 0,8971058 | DERL2     | protein_coding       |
| 0,2533818 | MRVI1     | protein_coding       |
| 0,8630325 | AP1M1     | protein_coding       |
| 0,0796818 | PVR       | protein_coding       |
| 0,9068107 | SCARB1    | protein_coding       |
| 0,962885  | ALPK1     | protein_coding       |
| 0,9998478 | PDE8A     | protein_coding       |
| 0,5511615 | CLCN4     | protein_coding       |
| 0,7118106 | SDHA      | protein_coding       |
| 0,4726081 | SMARCE1   | protein_coding       |
| 0,7559894 | KDM5A     | protein_coding       |
| 0,4799252 | PPP2R3A   | protein_coding       |
| 0,4697514 | FERMT2    | protein_coding       |
| 0,0757434 | DHRS9     | protein_coding       |
| 0,998169  | IGF2BP2   | protein_coding       |
| 0,9127443 | MAP3K13   | protein_coding       |
| 0,4321437 | ST6GAL1   | protein_coding       |
| 0,3765746 | VDAC1P1   | processed_pseudogene |
| 0,9792506 | FRY       | protein_coding       |
| 0,992369  | PICALM    | protein_coding       |
| 0,8422763 | NSF       | protein_coding       |
| 0,933129  | CLASP1    | protein_coding       |
| 0,8992483 | NOTCH3    | protein_coding       |
| 0,6651622 | CLNS1A    | protein_coding       |
| 0,3316892 | TEAD2     | protein_coding       |
| 0,9406097 | EED       | protein_coding       |
| 0,7182975 | TSG101    | protein_coding       |
| 0,6929857 | NCBP3     | protein_coding       |
| 0,4221375 | MGLL      | protein_coding       |
| 0,8919058 | NTN4      | protein_coding       |
| 0,7740102 | BCS1L     | protein_coding       |
| 0,5180247 | NUAK1     | protein_coding       |
| 0,8992483 | DPP8      | protein_coding       |
| 0,6988495 | ZNF532    | protein_coding       |
| 0,9245441 | LMAN1     | protein_coding       |
| 0,5095965 | HACD3     | protein_coding       |
| 0,9771336 | ZZEF1     | protein_coding       |
| 0,9917279 | ENO1      | protein_coding       |
| 0,9808899 | MYDGF     | protein_coding       |
| 0,6761449 | TUBE1     | protein_coding       |
| 0,7352523 | ARHGEF10L | protein_coding       |
| 0,7694456 | ACTR6     | protein_coding       |
| 0,8117718 | SRI       | protein_coding       |
| 0,9647765 | EIF4G3    | protein_coding       |
| 0,5134965 | SEMA3C    | protein_coding       |
| 0,8790229 | TTC38     | protein_coding       |
| 0,738173  | ACAT1     | protein_coding       |
| 0,9558655 | GRAMD4    | protein_coding       |

|           |          |                |
|-----------|----------|----------------|
| 0,5117223 | CELSR1   | protein_coding |
| 0,8868311 | ZNF638   | protein_coding |
| 0,7364979 | SLC25A40 | protein_coding |
| 0,1582806 | TIMM21   | protein_coding |
| 0,5879554 | RASAL2   | protein_coding |
| 0,7842247 | ZNF37A   | protein_coding |
| 0,4835164 | MARK3    | protein_coding |
| 0,2179973 | SLC25A3  | protein_coding |
| 0,9484395 | FNDC3B   | protein_coding |
| 0,9544158 | FOSL2    | protein_coding |
| 0,6999614 | FRYL     | protein_coding |
| 0,9632674 | TMEM131  | protein_coding |
| 0,8373584 | ACTB     | protein_coding |
| 0,5364552 | PLD1     | protein_coding |
| 0,7921707 | DLG1     | protein_coding |
| 0,9998478 | RAB7A    | protein_coding |
| 0,5347705 | BCAP29   | protein_coding |
| 0,8259599 | SEC31B   | protein_coding |
| 0,4161706 | SART3    | protein_coding |
| 0,90504   | ARHGAP15 | protein_coding |
| 0,9644268 | EXOSC7   | protein_coding |
| 0,9125449 | KIFAP3   | protein_coding |
| 0,9357394 | MKRN2    | protein_coding |
| 0,8114908 | MCM6     | protein_coding |
| 0,5400662 | REXO2    | protein_coding |
| 0,9182782 | RBM7     | protein_coding |
| 0,8189129 | RBMS2    | protein_coding |
| 0,8189129 | BAZ2A    | protein_coding |
| 0,5688668 | MLH1     | protein_coding |
| 0,4045325 | UNG      | protein_coding |
| 0,6591379 | KLHL20   | protein_coding |
| 0,8992483 | PLXNA2   | protein_coding |
| 0,7118106 | ANKRD13A | protein_coding |
| 0,8992483 | TPD52    | protein_coding |
| 0,7816267 | ACACB    | protein_coding |
| 0,284683  | PAG1     | protein_coding |
| 0,8221205 | NT5C2    | protein_coding |
| 0,9374738 | MCAM     | protein_coding |
| 0,7390284 | GPC4     | protein_coding |
| 0,7736716 | MBNL3    | protein_coding |
| 0,9808899 | NMRK2    | protein_coding |
| 0,8882787 | DGKD     | protein_coding |
| 0,3820553 | CTTNBP2  | protein_coding |
| 0,4519396 | RARB     | protein_coding |
| 0,9900268 | TOP2B    | protein_coding |
| 0,9880046 | TM9SF3   | protein_coding |
| 0,9428271 | PPP1R12B | protein_coding |
| 0,9953531 | DNAJC10  | protein_coding |
| 0,8209243 | GTF3C1   | protein_coding |
| 0,71754   | IL4R     | protein_coding |
| 0,9616434 | USP33    | protein_coding |
| 0,6896707 | DYNC1I2  | protein_coding |
| 0,9998538 | FAM76B   | protein_coding |
| 0,9982092 | POLD3    | protein_coding |
| 0,993752  | ACTN2    | protein_coding |
| 0,8992483 | CAPZB    | protein_coding |
| 0,4593782 | GPR137B  | protein_coding |
| 0,8229361 | JADE1    | protein_coding |
| 0,7774855 | UBE2A    | protein_coding |

|           |          |                |
|-----------|----------|----------------|
| 0,9808899 | FGFR1    | protein_coding |
| 0,9081173 | FBLN1    | protein_coding |
| 0,5664861 | ITGA8    | protein_coding |
| 0,62553   | MAP2     | protein_coding |
| 0,804648  | PIAS2    | protein_coding |
| 0,2330928 | AMPH     | protein_coding |
| 0,727014  | ARAF     | protein_coding |
| 0,6563172 | MCCC1    | protein_coding |
| 0,8021477 | NEBL     | protein_coding |
| 0,9928407 | ACER3    | protein_coding |
| 0,768388  | UBE2K    | protein_coding |
| 0,997931  | PIK3C3   | protein_coding |
| 0,7154026 | N4BP2    | protein_coding |
| 0,4160411 | TULP3    | protein_coding |
| 0,330331  | SYNJ2    | protein_coding |
| 0,9773277 | PPP2R5C  | protein_coding |
| 0,4541226 | RBFOX1   | protein_coding |
| 0,8155634 | GNB1     | protein_coding |
| 0,9967216 | MLLT10   | protein_coding |
| 0,8301309 | ITM2A    | protein_coding |
| 0,2281984 | NRDC     | protein_coding |
| 0,3653635 | VDAC3    | protein_coding |
| 0,8840514 | PCM1     | protein_coding |
| 0,7558125 | TNRC6C   | protein_coding |
| 0,6867028 | CBFA2T2  | protein_coding |
| 0,9672665 | ITCH     | protein_coding |
| 0,7235397 | TP53INP2 | protein_coding |
| 0,855954  | SDF4     | protein_coding |
| 0,645515  | MYH7B    | protein_coding |
| 0,5140003 | UBE2D4   | protein_coding |
| 0,9439974 | RUNX1T1  | protein_coding |
| 0,7359516 | THOC1    | protein_coding |
| 0,9914435 | FKBP7    | protein_coding |
| 0,6762366 | OSBPL6   | protein_coding |
| 0,0727176 | SLC1A3   | protein_coding |
| 0,855954  | XRCC5    | protein_coding |
| 0,6184746 | MKNK1    | protein_coding |
| 0,9181578 | TNS1     | protein_coding |
| 0,9494633 | SAR1A    | protein_coding |
| 0,7440219 | CDC14A   | protein_coding |
| 0,7456311 | RAPGEF3  | protein_coding |
| 0,8386162 | SENP1    | protein_coding |
| 0,5462026 | LIPE     | protein_coding |
| 0,7836389 | FDFT1    | protein_coding |
| 0,3516664 | OPHN1    | protein_coding |
| 0,2321036 | CARMIL1  | protein_coding |
| 0,4314718 | PGM1     | protein_coding |
| 0,5625279 | DDX1     | protein_coding |
| 0,7219856 | DNM2     | protein_coding |
| 0,4450378 | EPB41L2  | protein_coding |
| 0,9540553 | STX7     | protein_coding |
| 0,9840915 | KEAP1    | protein_coding |
| 0,7558125 | SLC35C2  | protein_coding |
| 0,9587213 | CRYBG3   | protein_coding |
| 0,9496064 | RFX3     | protein_coding |
| 0,9933219 | RIF1     | protein_coding |
| 0,9766993 | RAB21    | protein_coding |
| 0,4344504 | SLC4A4   | protein_coding |
| 0,4818782 | SMARCA2  | protein_coding |

|           |          |                |
|-----------|----------|----------------|
| 0,3398681 | SESN1    | protein_coding |
| 0,6491869 | COL5A3   | protein_coding |
| 0,7321942 | PUM3     | protein_coding |
| 0,0125259 | KCNN2    | protein_coding |
| 0,9233889 | CNOT4    | protein_coding |
| 0,9771336 | PSEN1    | protein_coding |
| 0,4607593 | CLDND1   | protein_coding |
| 0,9248086 | MOK      | protein_coding |
| 0,6244656 | HSP90AA1 | protein_coding |
| 0,864196  | RBL1     | protein_coding |
| 0,5622112 | DLGAP4   | protein_coding |
| 0,887319  | IGSF9B   | protein_coding |
| 0,8951112 | AP4E1    | protein_coding |
| 0,7842247 | RSBN1    | protein_coding |
| 0,6463814 | MAGI3    | protein_coding |
| 0,579213  | CXCL2    | protein_coding |
| 0,8823913 | COL4A4   | protein_coding |
| 0,5209997 | OSTM1    | protein_coding |
| 0,9496064 | PCNP     | protein_coding |
| 0,9917279 | EXD2     | protein_coding |
| 0,9127443 | MEF2C    | protein_coding |
| 0,9112805 | PTPRC    | protein_coding |
| 0,59951   | UBA5     | protein_coding |
| 0,5709725 | STK17B   | protein_coding |
| 0,8559418 | CDC14B   | protein_coding |
| 0,931978  | ZNF510   | protein_coding |
| 0,9616301 | ZNF506   | protein_coding |
| 0,1444307 | AACS     | protein_coding |
| 0,6816598 | DELE1    | protein_coding |
| 0,0317466 | CADPS2   | protein_coding |
| 0,6060734 | HSPB11   | protein_coding |
| 0,9781971 | PHLPP1   | protein_coding |
| 0,99743   | ATP8B1   | protein_coding |
| 0,4264135 | SMARCD3  | protein_coding |
| 0,9894339 | WDR70    | protein_coding |
| 0,8834615 | FYB1     | protein_coding |
| 0,998169  | STRADB   | protein_coding |
| 0,8992483 | BZW1     | protein_coding |
| 0,7154506 | PGR      | protein_coding |
| 0,1933793 | ME2      | protein_coding |
| 0,7320618 | C5orf22  | protein_coding |
| 0,8554227 | CCNT2    | protein_coding |
| 0,7213265 | FAM135A  | protein_coding |
| 0,1801696 | EPB41L3  | protein_coding |
| 0,4818782 | COBLL1   | protein_coding |
| 0,7589872 | DLG3     | protein_coding |
| 0,1350446 | SERTAD4  | protein_coding |
| 0,7019864 | TRAF5    | protein_coding |
| 0,252949  | MRPL22   | protein_coding |
| 0,993752  | GEMIN5   | protein_coding |
| 0,9362475 | NFE2L1   | protein_coding |
| 0,9840915 | GSK3B    | protein_coding |
| 0,0959391 | ITGB5    | protein_coding |
| 0,9233889 | ERC1     | protein_coding |
| 0,8091803 | XPO1     | protein_coding |
| 0,9173787 | RNF13    | protein_coding |
| 0,9533676 | PALB2    | protein_coding |
| 0,8219774 | DOP1A    | protein_coding |
| 0,3881918 | LYRM2    | protein_coding |

|           |          |                |
|-----------|----------|----------------|
| 0,9973317 | BCKDHB   | protein_coding |
| 0,9977992 | KAT6A    | protein_coding |
| 0,9689977 | TUT7     | protein_coding |
| 0,0385201 | ULK2     | protein_coding |
| 0,9998478 | TNPO1    | protein_coding |
| 0,9341044 | PLOD1    | protein_coding |
| 0,887319  | DIS3     | protein_coding |
| 0,9997039 | PIBF1    | protein_coding |
| 0,7558125 | TDRD3    | protein_coding |
| 0,9112805 | PDS5B    | protein_coding |
| 0,8238202 | OXCT1    | protein_coding |
| 0,7956173 | RRAGB    | protein_coding |
| 0,2486339 | CYLD     | protein_coding |
| 0,997931  | ZNF671   | protein_coding |
| 0,9951314 | ZNF586   | protein_coding |
| 0,3513961 | ZNF264   | protein_coding |
| 0,827821  | RPS5     | protein_coding |
| 0,7688687 | FAT1     | protein_coding |
| 0,4718    | YTHDC1   | protein_coding |
| 0,9738194 | CHMP2B   | protein_coding |
| 0,9700303 | SMAP2    | protein_coding |
| 0,5869872 | PPIE     | protein_coding |
| 0,330331  | ZMPSTE24 | protein_coding |
| 0,284683  | STARD7   | protein_coding |
| 0,947809  | NOA1     | protein_coding |
| 0,4456365 | REST     | protein_coding |
| 0,7321942 | SSH1     | protein_coding |
| 0,9363291 | GSTP1    | protein_coding |
| 0,9900663 | APLP2    | protein_coding |
| 0,6425736 | WBP11    | protein_coding |
| 0,7296863 | EIF3I    | protein_coding |
| 0,1856054 | COL16A1  | protein_coding |
| 0,8575378 | TXLNA    | protein_coding |
| 0,654521  | APOB     | protein_coding |
| 0,6854132 | NCOA1    | protein_coding |
| 0,8269408 | AGBL5    | protein_coding |
| 0,5723744 | EFR3B    | protein_coding |
| 0,4519396 | RAB10    | protein_coding |
| 0,54953   | HADHA    | protein_coding |
| 0,5455384 | MAPRE3   | protein_coding |
| 0,5444622 | CAD      | protein_coding |
| 0,0390866 | CD59     | protein_coding |
| 0,8992483 | ATRX     | protein_coding |
| 0,7114715 | AK6      | protein_coding |
| 0,7558125 | MYNN     | protein_coding |
| 0,3316892 | MECOM    | protein_coding |
| 0,7558125 | SCAMP1   | protein_coding |
| 0,8850069 | PREP     | protein_coding |
| 0,9118315 | HACE1    | protein_coding |
| 0,930757  | SEH1L    | protein_coding |
| 0,9953531 | WDR47    | protein_coding |
| 0,6438808 | WDFY1    | protein_coding |
| 0,6511505 | SLC25A24 | protein_coding |
| 0,623981  | MAP3K4   | protein_coding |
| 0,0385201 | AKR1B1   | protein_coding |
| 0,6689227 | CPNE3    | protein_coding |
| 0,5170218 | RRN3     | protein_coding |
| 0,191133  | CTTN     | protein_coding |
| 0,284683  | MTIF2    | protein_coding |

|           |          |                |
|-----------|----------|----------------|
| 0,7118106 | DDHD2    | protein_coding |
| 0,3803906 | TTC39A   | protein_coding |
| 0,9768456 | EPS15    | protein_coding |
| 0,5313262 | MGST2    | protein_coding |
| 0,9625694 | ATG16L1  | protein_coding |
| 0,9496064 | USP40    | protein_coding |
| 0,8714772 | POMGNT1  | protein_coding |
| 0,6319662 | MAST2    | protein_coding |
| 0,933129  | DNAJA1   | protein_coding |
| 0,8698319 | B4GALT1  | protein_coding |
| 0,9544158 | CHMP5    | protein_coding |
| 0,9233889 | NFX1     | protein_coding |
| 0,9962215 | DIMT1    | protein_coding |
| 0,9953531 | IPO11    | protein_coding |
| 0,8417824 | EIF2AK1  | protein_coding |
| 0,7571978 | EPDR1    | protein_coding |
| 0,997931  | SEPHS1   | protein_coding |
| 0,6303013 | ITPKC    | protein_coding |
| 0,4806087 | RBM22    | protein_coding |
| 0,9709611 | TMED2    | protein_coding |
| 0,8992483 | ERO1B    | protein_coding |
| 0,7687197 | ZFAND6   | protein_coding |
| 0,9233889 | TXLNG    | protein_coding |
| 0,7936863 | HUWE1    | protein_coding |
| 0,692146  | ZW10     | protein_coding |
| 0,9173787 | ALG9     | protein_coding |
| 0,0941174 | NOX4     | protein_coding |
| 0,4826313 | ACOX3    | protein_coding |
| 0,7972313 | MTMR2    | protein_coding |
| 0,5175383 | PPP1R15A | protein_coding |
| 0,6613295 | FTL      | protein_coding |
| 0,931978  | SRRT     | protein_coding |
| 0,5560269 | NLK      | protein_coding |
| 0,5343413 | PIGS     | protein_coding |
| 0,5011485 | ADAMTS2  | protein_coding |
| 0,8422988 | ATXN7L3  | protein_coding |
| 0,4894579 | PGS1     | protein_coding |
| 0,6448972 | PSMC5    | protein_coding |
| 0,9350074 | UIMC1    | protein_coding |
| 0,5140003 | MMP2     | protein_coding |
| 0,8887908 | LPCAT2   | protein_coding |
| 0,7558125 | GNAO1    | protein_coding |
| 0,8495694 | OGFOD1   | protein_coding |
| 0,7558125 | SH3BP2   | protein_coding |
| 0,9621537 | NOP14    | protein_coding |
| 0,9127443 | ADD1     | protein_coding |
| 0,4957019 | L2HGDH   | protein_coding |
| 0,4179007 | TXNDC16  | protein_coding |
| 0,3459301 | RTRAF    | protein_coding |
| 0,8381234 | NID2     | protein_coding |
| 0,5073158 | GMCL1    | protein_coding |
| 0,7854018 | SF3B2    | protein_coding |
| 0,9439974 | KLHL42   | protein_coding |
| 0,9178514 | GNAS     | protein_coding |
| 0,5347705 | DNM1L    | protein_coding |
| 0,5675917 | ERGIC2   | protein_coding |
| 0,289067  | AAMDC    | protein_coding |
| 0,7748443 | METTL2A  | protein_coding |
| 0,975657  | PTPN4    | protein_coding |

|           |           |                |
|-----------|-----------|----------------|
| 0,9702772 | DDX18     | protein_coding |
| 0,6277796 | KHSRP     | protein_coding |
| 0,9954421 | GNA11     | protein_coding |
| 0,6701082 | ASAP3     | protein_coding |
| 0,9296784 | EDEM2     | protein_coding |
| 0,54953   | EPB41L1   | protein_coding |
| 0,8745367 | DOCK9     | protein_coding |
| 0,9860605 | ANKRD10   | protein_coding |
| 0,9967216 | DOCK3     | protein_coding |
| 0,2419676 | C3orf18   | protein_coding |
| 0,4971845 | COQ9      | protein_coding |
| 0,5474737 | PPP1R13B  | protein_coding |
| 0,7230802 | ATRN      | protein_coding |
| 0,1709741 | SIGLEC1   | protein_coding |
| 0,6254273 | FKBP1A    | protein_coding |
| 0,8512635 | NSFL1C    | protein_coding |
| 0,6887436 | C20orf194 | protein_coding |
| 0,9962215 | MAVS      | protein_coding |
| 0,5267449 | XRN2      | protein_coding |
| 0,5485366 | KIZ       | protein_coding |
| 0,9142106 | DYNLL1    | protein_coding |
| 0,4750209 | SNX5      | protein_coding |
| 0,9484395 | RPL6      | protein_coding |
| 0,9174724 | MAPKAPK5  | protein_coding |
| 0,9598334 | ESF1      | protein_coding |
| 0,7444016 | RBBP9     | protein_coding |
| 0,5590581 | ANAPC5    | protein_coding |
| 0,5393446 | SLC23A2   | protein_coding |
| 0,5248109 | SLC8B1    | protein_coding |
| 0,827821  | TMEM230   | protein_coding |
| 0,4765298 | TASP1     | protein_coding |
| 0,7844757 | GCN1      | protein_coding |
| 0,9678404 | RPLP0     | protein_coding |
| 0,8238032 | PXN       | protein_coding |
| 0,6988495 | KIF16B    | protein_coding |
| 0,7122541 | TRMT6     | protein_coding |
| 0,6287358 | CHGB      | protein_coding |
| 0,6574161 | PEBP1     | protein_coding |
| 0,8941532 | TBX5      | protein_coding |
| 0,841851  | BRAP      | protein_coding |
| 0,9765371 | ERP29     | protein_coding |
| 0,8594992 | FUS       | protein_coding |
| 0,9840915 | IGBP1     | protein_coding |
| 0,7114949 | ZNF302    | protein_coding |
| 0,5114885 | HEPH      | protein_coding |
| 0,7154026 | CDIP1     | protein_coding |
| 0,6762366 | GANAB     | protein_coding |
| 0,9481776 | RBM41     | protein_coding |
| 0,6383874 | MLF2      | protein_coding |
| 0,9169269 | DDX24     | protein_coding |
| 0,6053522 | ZBTB25    | protein_coding |
| 0,9838551 | NECAP1    | protein_coding |
| 0,5777776 | DHX32     | protein_coding |
| 0,9998538 | RCOR1     | protein_coding |
| 0,9802452 | GPATCH2L  | protein_coding |
| 0,2945575 | LTBP4     | protein_coding |
| 0,7611529 | BLVRB     | protein_coding |
| 0,8698319 | SPTLC1    | protein_coding |
| 0,7029174 | PAPOLA    | protein_coding |

|           |           |                |
|-----------|-----------|----------------|
| 0,9589961 | PCBP4     | protein_coding |
| 0,1431227 | MRPS33    | protein_coding |
| 0,1559069 | NDUFB2    | protein_coding |
| 0,5265966 | NUDC      | protein_coding |
| 0,8992483 | MAEA      | protein_coding |
| 0,887128  | ICAM1     | protein_coding |
| 0,8721281 | STRN4     | protein_coding |
| 0,9484395 | IRAK3     | protein_coding |
| 0,9142106 | LYZ       | protein_coding |
| 0,5510556 | MUL1      | protein_coding |
| 0,5440543 | PDCD7     | protein_coding |
| 0,8721281 | SPG21     | protein_coding |
| 0,8823583 | DNAJB11   | protein_coding |
| 0,2354584 | RAB11FIP3 | protein_coding |
| 0,933129  | ZNF268    | protein_coding |
| 0,3194617 | GOLGA3    | protein_coding |
| 0,8885864 | PABPC4    | protein_coding |
| 0,0247382 | CD209     | protein_coding |
| 0,8698323 | USP48     | protein_coding |
| 0,9900815 | EFNB1     | protein_coding |
| 0,6604792 | PDPR      | protein_coding |
| 0,8698319 | AARS      | protein_coding |
| 0,6613295 | GLG1      | protein_coding |
| 0,9997039 | TNRC6A    | protein_coding |
| 0,6785825 | EXOC1     | protein_coding |
| 0,8523001 | RBM27     | protein_coding |
| 0,8847411 | OSBPL8    | protein_coding |
| 0,7201269 | LAMB1     | protein_coding |
| 0,5024248 | DLD       | protein_coding |
| 0,7834554 | WDR7      | protein_coding |
| 0,2506935 | TXNL1     | protein_coding |
| 0,8318664 | CMTM6     | protein_coding |
| 0,4115954 | ITGA6     | protein_coding |
| 0,8834615 | RAPGEF4   | protein_coding |
| 0,9781971 | MAP3K20   | protein_coding |
| 0,2318378 | SMPX      | protein_coding |
| 0,3954735 | FH        | protein_coding |
| 0,9142106 | TF        | protein_coding |
| 0,8436853 | CDV3      | protein_coding |
| 0,7954765 | ALKBH5    | protein_coding |
| 0,330331  | NLRP1     | protein_coding |
| 0,5263704 | SPAG7     | protein_coding |
| 0,2443691 | ZFXH4     | protein_coding |
| 0,6160654 | ZC3HC1    | protein_coding |
| 0,3679769 | ESR1      | protein_coding |
| 0,7904545 | ANGPT2    | protein_coding |
| 0,4031526 | CD200     | protein_coding |
| 0,5879554 | CCDC80    | protein_coding |
| 0,6607313 | PSME1     | protein_coding |
| 0,738122  | PPP2R3C   | protein_coding |
| 0,4151093 | MYH7      | protein_coding |
| 0,6173428 | OSGEP     | protein_coding |
| 0,8725749 | SCFD1     | protein_coding |
| 0,9194118 | G2E3      | protein_coding |
| 0,947809  | HECTD1    | protein_coding |
| 0,9827285 | HNRNPC    | protein_coding |
| 0,3881918 | SUPT16H   | protein_coding |
| 0,9067454 | TOX4      | protein_coding |
| 0,9248086 | TINF2     | protein_coding |



|           |          |                |
|-----------|----------|----------------|
| 0,3803906 | SEMA6A   | protein_coding |
| 0,9998478 | TRPM7    | protein_coding |
| 0,997931  | SNAP23   | protein_coding |
| 0,307685  | PHGDH    | protein_coding |
| 0,4179007 | EZR      | protein_coding |
| 0,8238032 | MYL6     | protein_coding |
| 0,8545769 | AGO1     | protein_coding |
| 0,6184079 | RFFL     | protein_coding |
| 0,4806087 | MFSD11   | protein_coding |
| 0,9233889 | DPYSL2   | protein_coding |
| 0,8930787 | GPATCH2  | protein_coding |
| 0,5402971 | NUP50    | protein_coding |
| 0,9768456 | COMT     | protein_coding |
| 0,8422988 | ADA2     | protein_coding |
| 0,8318519 | ECHDC1   | protein_coding |
| 0,7673209 | LRRFIP2  | protein_coding |
| 0,7154026 | SEC22C   | protein_coding |
| 0,7318327 | HDAC6    | protein_coding |
| 0,8908494 | UPRT     | protein_coding |
| 0,9432348 | CDC23    | protein_coding |
| 0,9296784 | AAAS     | protein_coding |
| 0,6220194 | CBX5     | protein_coding |
| 0,2283663 | FMO2     | protein_coding |
| 0,9781971 | SUCO     | protein_coding |
| 0,9724163 | MSH2     | protein_coding |
| 0,9253623 | MAP3K1   | protein_coding |
| 0,768388  | HOOK2    | protein_coding |
| 0,4137636 | ARCN1    | protein_coding |
| 0,8373584 | EPB41L4B | protein_coding |
| 0,2250724 | TMEM38B  | protein_coding |
| 0,9358987 | PSMD5    | protein_coding |
| 0,0845999 | PTGS1    | protein_coding |
| 0,9077931 | NUP188   | protein_coding |
| 0,8415978 | CRAT     | protein_coding |
| 0,3694563 | NANS     | protein_coding |
| 0,9978259 | CWF19L1  | protein_coding |
| 0,8318664 | BTAFL1   | protein_coding |
| 0,8301309 | IKZF5    | protein_coding |
| 0,9827285 | SORBS1   | protein_coding |
| 0,2834613 | BAMBI    | protein_coding |
| 0,9977992 | WAC      | protein_coding |
| 0,5799008 | CREM     | protein_coding |
| 0,9578517 | HIVEP1   | protein_coding |
| 0,4160411 | FKBP5    | protein_coding |
| 0,54642   | SRPK1    | protein_coding |
| 0,997931  | BRPF3    | protein_coding |
| 0,3549138 | EFHC1    | protein_coding |
| 0,7243515 | HSP90AB1 | protein_coding |
| 0,9481776 | CDC5L    | protein_coding |
| 0,9947212 | ITPR3    | protein_coding |
| 0,7352523 | DSP      | protein_coding |
| 0,5972245 | SIRT1    | protein_coding |
| 0,9603194 | HNRNPH3  | protein_coding |
| 0,8500846 | IFT74    | protein_coding |
| 0,730414  | JAK2     | protein_coding |
| 0,6206631 | ABL1     | protein_coding |
| 0,9647765 | SH3GLB1  | protein_coding |
| 0,8287149 | SYDE2    | protein_coding |
| 0,5846553 | PCSK5    | protein_coding |

|           |         |                |
|-----------|---------|----------------|
| 0,931978  | SCD     | protein_coding |
| 0,7714588 | ABLIM1  | protein_coding |
| 0,7468218 | ERMP1   | protein_coding |
| 0,7743102 | RAB18   | protein_coding |
| 0,8117718 | NRP1    | protein_coding |
| 0,2169157 | PALMD   | protein_coding |
| 0,316005  | WASHC2A | protein_coding |
| 0,9017378 | MYO9B   | protein_coding |
| 0,9386808 | PSMD8   | protein_coding |
| 0,8176511 | CIRBP   | protein_coding |
| 0,7611852 | PRKY    | protein_coding |
| 0,9484395 | HNRNPM  | protein_coding |
| 0,9463928 | MARCH2  | protein_coding |
| 0,809839  | NDUFB7  | protein_coding |
| 0,6563172 | TECR    | protein_coding |
| 0,9952606 | MTAP    | protein_coding |
| 0,9424246 | POLR2E  | protein_coding |
| 0,9333994 | GADD45B | protein_coding |
| 0,855954  | MKNK2   | protein_coding |
| 0,8489317 | RANBP1  | protein_coding |
| 0,9377639 | KLHL22  | protein_coding |
| 0,9709611 | MED15   | protein_coding |
| 0,8865445 | SNAP29  | protein_coding |
| 0,9424246 | CRKL    | protein_coding |
| 0,8285832 | CECR2   | protein_coding |
| 0,730414  | SMARCB1 | protein_coding |
| 0,6229784 | BCL2L13 | protein_coding |
| 0,8909428 | CABIN1  | protein_coding |
| 0,8422988 | SF3A1   | protein_coding |
| 0,5074563 | SPECC1L | protein_coding |
| 0,887319  | PPIL2   | protein_coding |
| 0,9237476 | SNRPD3  | protein_coding |
| 0,997923  | PES1    | protein_coding |
| 0,4835164 | MAPK1   | protein_coding |
| 0,6134356 | PPM1F   | protein_coding |
| 0,7175278 | CYTH4   | protein_coding |
| 0,3912252 | GRK3    | protein_coding |
| 0,8603095 | GGA1    | protein_coding |
| 0,9824231 | LGALS1  | protein_coding |
| 0,9377639 | HPS4    | protein_coding |
| 0,166273  | PIK3IP1 | protein_coding |
| 0,6169817 | SRRD    | protein_coding |
| 0,2778507 | PATZ1   | protein_coding |
| 0,9801969 | TRIOBP  | protein_coding |
| 0,855954  | TFIP11  | protein_coding |
| 0,5212854 | EIF3L   | protein_coding |
| 0,3382498 | SNU13   | protein_coding |
| 0,6766513 | TTC28   | protein_coding |
| 0,397269  | SLC5A1  | protein_coding |
| 0,0727176 | KDELRL3 | protein_coding |
| 0,9074092 | DDX17   | protein_coding |
| 0,81614   | TCF20   | protein_coding |
| 0,9081173 | CBY1    | protein_coding |
| 0,633922  | TOMM22  | protein_coding |
| 0,887319  | XBP1    | protein_coding |
| 0,9316489 | RTCB    | protein_coding |
| 0,4246004 | JOSD1   | protein_coding |
| 0,5249547 | FBXO7   | protein_coding |
| 0,6408377 | GTPBP1  | protein_coding |

|           |          |                |
|-----------|----------|----------------|
| 0,7835684 | POLDIP3  | protein_coding |
| 0,997931  | TIMP3    | protein_coding |
| 0,7437136 | PPP6R2   | protein_coding |
| 0,6611168 | SBF1     | protein_coding |
| 0,995098  | SUN2     | protein_coding |
| 0,9450135 | CYB5R3   | protein_coding |
| 0,8992483 | PACSLN2  | protein_coding |
| 0,9954421 | AP1B1    | protein_coding |
| 0,9215449 | HMGXB4   | protein_coding |
| 0,891947  | TOM1     | protein_coding |
| 0,3078991 | HMOX1    | protein_coding |
| 0,3697716 | THOC5    | protein_coding |
| 0,9998478 | TSPO     | protein_coding |
| 0,7542355 | CBX7     | protein_coding |
| 0,5723744 | RPL3     | protein_coding |
| 0,9240289 | RBFOX2   | protein_coding |
| 0,6776989 | SYNGR1   | protein_coding |
| 0,8500846 | ASCC2    | protein_coding |
| 0,4321437 | MTMR3    | protein_coding |
| 0,7740102 | MIEF1    | protein_coding |
| 0,9919804 | APOL1    | protein_coding |
| 0,8578793 | MYH9     | protein_coding |
| 0,2533818 | SAMM50   | protein_coding |
| 0,5707233 | TXN2     | protein_coding |
| 0,8861906 | EIF3D    | protein_coding |
| 0,7956789 | TNRC6B   | protein_coding |
| 0,7713242 | IFT27    | protein_coding |
| 0,9298036 | KIAA0930 | protein_coding |
| 0,8238032 | FAM118A  | protein_coding |
| 0,7357059 | ST13     | protein_coding |
| 0,5985056 | RBX1     | protein_coding |
| 0,7743102 | EP300    | protein_coding |
| 0,9703483 | L3MBTL2  | protein_coding |
| 0,9464798 | RANGAP1  | protein_coding |
| 0,5771952 | ZC3H7B   | protein_coding |
| 0,6168923 | PHF5A    | protein_coding |
| 0,933129  | ACO2     | protein_coding |
| 0,4999985 | TRMU     | protein_coding |
| 0,0904915 | DESI1    | protein_coding |
| 0,6285359 | CERK     | protein_coding |
| 0,7558125 | BRD1     | protein_coding |
| 0,8887908 | ZBED4    | protein_coding |
| 0,9941887 | ABHD4    | protein_coding |
| 0,7528498 | KHNYN    | protein_coding |
| 0,0796818 | FKBP3    | protein_coding |
| 0,9484395 | RBM23    | protein_coding |
| 0,9982092 | PRMT5    | protein_coding |
| 0,8301103 | AP4S1    | protein_coding |
| 0,6762366 | SOS2     | protein_coding |
| 0,9917279 | NIN      | protein_coding |
| 0,779252  | PYGL     | protein_coding |
| 0,5212854 | PSMC6    | protein_coding |
| 0,8364227 | DDHD1    | protein_coding |
| 0,8992483 | CNIH1    | protein_coding |
| 0,6878093 | CGRFR1   | protein_coding |
| 0,5187247 | ATP6V1D  | protein_coding |
| 0,0868691 | PSMA3    | protein_coding |
| 0,7935149 | VTI1B    | protein_coding |
| 0,9282793 | KIAA0586 | protein_coding |

|           |          |                |
|-----------|----------|----------------|
| 0,54642   | TMED8    | protein_coding |
| 0,4246004 | AHSA1    | protein_coding |
| 0,9726433 | DAAM1    | protein_coding |
| 0,9953531 | SPTLC2   | protein_coding |
| 0,4498511 | LGMN     | protein_coding |
| 0,8824496 | SNW1     | protein_coding |
| 0,8745989 | ITPK1    | protein_coding |
| 0,4684923 | DHRS7    | protein_coding |
| 0,7968733 | PPM1A    | protein_coding |
| 0,3912252 | GALNT16  | protein_coding |
| 0,3607643 | ASB2     | protein_coding |
| 0,7713242 | ERH      | protein_coding |
| 0,9933219 | HIF1A    | protein_coding |
| 0,8155634 | SUSD6    | protein_coding |
| 0,9535559 | SRSF5    | protein_coding |
| 0,892596  | EIF5     | protein_coding |
| 0,8436853 | DICER1   | protein_coding |
| 0,4835164 | ZFYVE21  | protein_coding |
| 0,6330107 | MTHFD1   | protein_coding |
| 0,997931  | ZC3H14   | protein_coding |
| 0,855954  | PCNX1    | protein_coding |
| 0,8319167 | GSKIP    | protein_coding |
| 0,9925374 | VRK1     | protein_coding |
| 0,5531846 | PSMC1    | protein_coding |
| 0,6238595 | RPS6KA5  | protein_coding |
| 0,9583708 | PPP4R3A  | protein_coding |
| 0,3089259 | PSMB5    | protein_coding |
| 0,7437571 | YY1      | protein_coding |
| 0,9745853 | ACIN1    | protein_coding |
| 0,3459301 | CCNB1IP1 | protein_coding |
| 0,9481776 | TRIP11   | protein_coding |
| 0,8992483 | APEX1    | protein_coding |
| 0,997931  | PABPN1   | protein_coding |
| 0,7118106 | ARHGAP5  | protein_coding |
| 0,6499951 | CINP     | protein_coding |
| 0,8373584 | SRP54    | protein_coding |
| 0,7885463 | CHD8     | protein_coding |
| 0,8885864 | DCAF11   | protein_coding |
| 0,4835164 | NFKBIA   | protein_coding |
| 0,8269408 | PSME2    | protein_coding |
| 0,6238595 | BRMS1L   | protein_coding |
| 0,5851976 | SEC23A   | protein_coding |
| 0,7956173 | GMPR2    | protein_coding |
| 0,9113537 | PNN      | protein_coding |
| 0,6146798 | NFATC4   | protein_coding |
| 0,077831  | PLTP     | protein_coding |
| 0,99611   | GSS      | protein_coding |
| 0,8871625 | TRPC4AP  | protein_coding |
| 0,5977377 | PYGB     | protein_coding |
| 0,9808899 | ABHD12   | protein_coding |
| 0,5881683 | PROCR    | protein_coding |
| 0,5029234 | UQCC1    | protein_coding |
| 0,613355  | ZMYND8   | protein_coding |
| 0,3122511 | IFT52    | protein_coding |
| 0,8875885 | NDRG3    | protein_coding |
| 0,3961322 | NFATC2   | protein_coding |
| 0,5911872 | STK4     | protein_coding |
| 0,2321036 | ADNP     | protein_coding |
| 0,5293665 | PFDN4    | protein_coding |

|           |          |                |
|-----------|----------|----------------|
| 0,1729437 | DOK5     | protein_coding |
| 0,8062191 | CSTF1    | protein_coding |
| 0,9406097 | RAE1     | protein_coding |
| 0,4153382 | TPD52L2  | protein_coding |
| 0,9282881 | DNAJC5   | protein_coding |
| 0,855954  | NELFCD   | protein_coding |
| 0,7122873 | CTSZ     | protein_coding |
| 0,4806087 | PRPF6    | protein_coding |
| 0,7313486 | PRELID3B | protein_coding |
| 0,3880092 | PSMA7    | protein_coding |
| 0,7367498 | DIDO1    | protein_coding |
| 0,3814605 | GID8     | protein_coding |
| 0,9789623 | EEF1A2   | protein_coding |
| 0,6463078 | RNF24    | protein_coding |
| 0,824287  | ARFRP1   | protein_coding |
| 0,2437974 | NDUFAF5  | protein_coding |
| 0,8525767 | RASSF2   | protein_coding |
| 0,8582079 | CSNK2A1  | protein_coding |
| 0,9420326 | CDS2     | protein_coding |
| 0,8939634 | HM13     | protein_coding |
| 0,9120573 | SEC23B   | protein_coding |
| 0,5768067 | PLCB4    | protein_coding |
| 0,7558577 | MYL9     | protein_coding |
| 0,8721867 | TM9SF4   | protein_coding |
| 0,9914435 | CRNKL1   | protein_coding |
| 0,6574161 | POFUT1   | protein_coding |
| 0,2908312 | SAMHD1   | protein_coding |
| 0,2250724 | KIF3B    | protein_coding |
| 0,6491869 | NOP56    | protein_coding |
| 0,2841212 | IDH3B    | protein_coding |
| 0,624851  | MAPRE1   | protein_coding |
| 0,9484395 | JAG1     | protein_coding |
| 0,4835164 | CDK5RAP1 | protein_coding |
| 0,5225448 | SNTA1    | protein_coding |
| 0,7244173 | TTI1     | protein_coding |
| 0,4965036 | RPRD1B   | protein_coding |
| 0,9165105 | PXMP4    | protein_coding |
| 0,6620763 | CHMP4B   | protein_coding |
| 0,7213265 | CST3     | protein_coding |
| 0,9817008 | AHCY     | protein_coding |
| 0,2945575 | PPP1R16B | protein_coding |
| 0,9962215 | DHX35    | protein_coding |
| 0,9827285 | SYNDIG1  | protein_coding |
| 0,615864  | APMAP    | protein_coding |
| 0,7542355 | ZNF516   | protein_coding |
| 0,5402971 | ADNP2    | protein_coding |
| 0,997931  | USP14    | protein_coding |
| 0,8877092 | VAPA     | protein_coding |
| 0,9609096 | METTL4   | protein_coding |
| 0,7972313 | LPIN2    | protein_coding |
| 0,9914435 | SMCHD1   | protein_coding |
| 0,9082846 | MYOM1    | protein_coding |
| 0,9781971 | MYL12A   | protein_coding |
| 0,8992483 | CEP192   | protein_coding |
| 0,8422988 | RNMT     | protein_coding |
| 0,0811214 | SMAD7    | protein_coding |
| 0,9544158 | ANKRD12  | protein_coding |
| 0,6676625 | POLI     | protein_coding |
| 0,7723854 | MIB1     | protein_coding |

|           |         |                |
|-----------|---------|----------------|
| 0,9508384 | RBBP8   | protein_coding |
| 0,806905  | RIOK3   | protein_coding |
| 0,2026798 | MXRA5   | protein_coding |
| 0,9922688 | PSMD10  | protein_coding |
| 0,3178493 | ATG4A   | protein_coding |
| 0,472118  | STS     | protein_coding |
| 0,8189129 | TBL1X   | protein_coding |
| 0,8832193 | PGRMC1  | protein_coding |
| 0,9666028 | POLA1   | protein_coding |
| 0,5123978 | MID1    | protein_coding |
| 0,9754097 | NKAP    | protein_coding |
| 0,6613295 | ATP1B4  | protein_coding |
| 0,6880486 | ALG13   | protein_coding |
| 0,8301309 | MOSPD1  | protein_coding |
| 0,613355  | AMMECR1 | protein_coding |
| 0,4894579 | CHRD1   | protein_coding |
| 0,9846914 | WDR13   | protein_coding |
| 0,2948143 | SRPX    | protein_coding |
| 0,864026  | XIAP    | protein_coding |
| 0,9793092 | STAG2   | protein_coding |
| 0,9967216 | ATP11C  | protein_coding |
| 0,7154026 | PLP2    | protein_coding |
| 0,6491869 | PLS3    | protein_coding |
| 0,284683  | SMARCA1 | protein_coding |
| 0,9270127 | RBBP7   | protein_coding |
| 0,4638153 | FMR1    | protein_coding |
| 0,5558351 | TAZ     | protein_coding |
| 0,3358222 | PGK1    | protein_coding |
| 0,8345564 | MAGT1   | protein_coding |
| 0,6456962 | SMS     | protein_coding |
| 0,6761449 | UBL4A   | protein_coding |
| 0,9709611 | CD99L2  | protein_coding |
| 0,7125689 | EEA1    | protein_coding |
| 0,77251   | RP2     | protein_coding |
| 0,6053653 | CDK16   | protein_coding |
| 0,1574812 | USP11   | protein_coding |
| 0,8918196 | HTATSF1 | protein_coding |
| 0,4314663 | TIMP1   | protein_coding |
| 0,9998478 | GABRE   | protein_coding |
| 0,5567171 | PIN4    | protein_coding |
| 0,5919274 | MAGED2  | protein_coding |
| 0,6835435 | RBM3    | protein_coding |
| 0,9933479 | KLF8    | protein_coding |
| 0,3699797 | SRPX2   | protein_coding |
| 0,3030424 | GLA     | protein_coding |
| 0,3513961 | ARMCX3  | protein_coding |
| 0,902171  | BEX4    | protein_coding |
| 0,6199383 | NALCN   | protein_coding |
| 0,9970518 | NDFIP2  | protein_coding |
| 0,6611168 | FNDC3A  | protein_coding |
| 0,6494449 | CAB39L  | protein_coding |
| 0,9700639 | STK24   | protein_coding |
| 0,8500846 | DNAJC3  | protein_coding |
| 0,7242009 | UGGT2   | protein_coding |
| 0,7842247 | ARHGEF7 | protein_coding |
| 0,2073391 | FGF9    | protein_coding |
| 0,8786805 | SGCG    | protein_coding |
| 0,5669789 | PARP4   | protein_coding |
| 0,9142106 | SUPT20H | protein_coding |

|           |          |                |
|-----------|----------|----------------|
| 0,3309973 | MRPS31   | protein_coding |
| 0,6418915 | KPNA3    | protein_coding |
| 0,504498  | FLT1     | protein_coding |
| 0,9917279 | RGCC     | protein_coding |
| 0,9794449 | VWA8     | protein_coding |
| 0,7658228 | DGKH     | protein_coding |
| 0,9254043 | KATNAL1  | protein_coding |
| 0,933129  | INTS6    | protein_coding |
| 0,9939034 | MEDAG    | protein_coding |
| 0,5015091 | TSC22D1  | protein_coding |
| 0,7968733 | CLN5     | protein_coding |
| 0,9666864 | ZNF629   | protein_coding |
| 0,7948949 | MAPK3    | protein_coding |
| 0,9233889 | PHKB     | protein_coding |
| 0,5318944 | LYRM1    | protein_coding |
| 0,9366634 | NUTF2    | protein_coding |
| 0,2945575 | NUP93    | protein_coding |
| 0,8704958 | NFAT5    | protein_coding |
| 0,9737459 | LONP2    | protein_coding |
| 0,8683086 | N4BP1    | protein_coding |
| 0,5869872 | DHODH    | protein_coding |
| 0,6613295 | CTCF     | protein_coding |
| 0,7560747 | POLR2C   | protein_coding |
| 0,6093605 | MMP15    | protein_coding |
| 0,5111636 | CYB5B    | protein_coding |
| 0,806856  | NDRG4    | protein_coding |
| 0,1431468 | PSMD7    | protein_coding |
| 0,9997039 | SLC38A7  | protein_coding |
| 0,8557332 | TANGO6   | protein_coding |
| 0,7740102 | COG4     | protein_coding |
| 0,7135335 | SLC7A6   | protein_coding |
| 0,4344504 | PLA2G15  | protein_coding |
| 0,9998538 | WDR59    | protein_coding |
| 0,9908068 | MON1B    | protein_coding |
| 0,105104  | CMC2     | protein_coding |
| 0,8912998 | MLYCD    | protein_coding |
| 0,0639504 | HSDL1    | protein_coding |
| 0,5337323 | USP10    | protein_coding |
| 0,0026029 | CRISPLD2 | protein_coding |
| 0,5752656 | TSC2     | protein_coding |
| 0,6873469 | ABCC1    | protein_coding |
| 0,7968733 | NOMO3    | protein_coding |
| 0,8545769 | FBXO31   | protein_coding |
| 0,9237476 | UBE2I    | protein_coding |
| 0,4532937 | CRYM     | protein_coding |
| 0,9424246 | EEF2K    | protein_coding |
| 0,9998478 | PIEZO1   | protein_coding |
| 0,7062909 | GSPT1    | protein_coding |
| 0,3765276 | CLUAP1   | protein_coding |
| 0,9358987 | UBFD1    | protein_coding |
| 0,9944531 | EARS2    | protein_coding |
| 0,9081173 | ELOB     | protein_coding |
| 0,997931  | GGA2     | protein_coding |
| 0,4161706 | CPPED1   | protein_coding |
| 0,7246609 | USP31    | protein_coding |
| 0,0640162 | HMOX2    | protein_coding |
| 0,747138  | DNAJA3   | protein_coding |
| 0,9343701 | BFAR     | protein_coding |
| 0,5485366 | RBL2     | protein_coding |

|           |         |                |
|-----------|---------|----------------|
| 0,5245497 | QPRT    | protein_coding |
| 0,6613295 | XYLT1   | protein_coding |
| 0,7912174 | STX4    | protein_coding |
| 0,9773277 | CDIPT   | protein_coding |
| 0,5139593 | BCKDK   | protein_coding |
| 0,9296784 | KAT8    | protein_coding |
| 0,8931895 | NOMO1   | protein_coding |
| 0,6511285 | CCP110  | protein_coding |
| 0,6781085 | VPS35L  | protein_coding |
| 0,6197914 | RNF40   | protein_coding |
| 0,5869872 | AQP9    | protein_coding |
| 0,9508384 | AAGAB   | protein_coding |
| 0,3792977 | LACTB   | protein_coding |
| 0,981554  | HERC1   | protein_coding |
| 0,9003006 | TRIP4   | protein_coding |
| 0,8410587 | MTFMT   | protein_coding |
| 0,144928  | RASL12  | protein_coding |
| 0,2368601 | RAB11A  | protein_coding |
| 0,6206631 | CTSH    | protein_coding |
| 0,6053653 | TTC23   | protein_coding |
| 0,7740102 | CD276   | protein_coding |
| 0,7871131 | FAH     | protein_coding |
| 0,8695843 | HOMER2  | protein_coding |
| 0,953175  | EHD4    | protein_coding |
| 0,9142507 | TMEM87A | protein_coding |
| 0,997931  | ZNF106  | protein_coding |
| 0,7444016 | CEP152  | protein_coding |
| 0,7190863 | ATP8B4  | protein_coding |
| 0,9463928 | DTWD1   | protein_coding |
| 0,997931  | GABPB1  | protein_coding |
| 0,446175  | TJP1    | protein_coding |
| 0,9536474 | DMXL2   | protein_coding |
| 0,7611852 | EIF3J   | protein_coding |
| 0,8575378 | SPG11   | protein_coding |
| 0,808509  | VPS18   | protein_coding |
| 0,5558351 | SLC30A4 | protein_coding |
| 0,8545769 | BLOC1S6 | protein_coding |
| 0,8118149 | MYEF2   | protein_coding |
| 0,8213028 | SGK3    | protein_coding |
| 0,1444307 | PDGFRL  | protein_coding |
| 0,9215449 | CSPP1   | protein_coding |
| 0,8881504 | ZDHHC2  | protein_coding |
| 0,8422988 | ZFAND1  | protein_coding |
| 0,997931  | FZD3    | protein_coding |
| 0,7158866 | INTS9   | protein_coding |
| 0,7611529 | NBN     | protein_coding |
| 0,8459353 | CPQ     | protein_coding |
| 0,2068936 | DECR1   | protein_coding |
| 0,9621856 | IMPAD1  | protein_coding |
| 0,5709725 | SFRP1   | protein_coding |
| 0,9928407 | LAPTM4B | protein_coding |
| 0,9536474 | UBE2W   | protein_coding |
| 0,5224131 | NIPAL2  | protein_coding |
| 0,9524483 | IKBKB   | protein_coding |
| 0,624851  | PLAT    | protein_coding |
| 0,6988495 | JPH1    | protein_coding |
| 0,9458749 | STK3    | protein_coding |
| 0,9982092 | RAB2A   | protein_coding |
| 0,9977992 | EIF3E   | protein_coding |



|           |          |                |
|-----------|----------|----------------|
| 0,5647201 | EMC2     | protein_coding |
| 0,8575378 | NDRG1    | protein_coding |
| 0,922549  | ZC2HC1A  | protein_coding |
| 0,6591549 | ARMC1    | protein_coding |
| 0,6462349 | TRPS1    | protein_coding |
| 0,7546576 | CHRA1    | protein_coding |
| 0,1800952 | NCALD    | protein_coding |
| 0,9253623 | SNX16    | protein_coding |
| 0,9725101 | UBR5     | protein_coding |
| 0,9889321 | EEF1D    | protein_coding |
| 0,9378903 | INTS10   | protein_coding |
| 0,9900268 | ERI1     | protein_coding |
| 0,1801696 | SLC39A14 | protein_coding |
| 0,284683  | MTMR9    | protein_coding |
| 0,8301309 | LEPROTL1 | protein_coding |
| 0,5505806 | DCTN6    | protein_coding |
| 0,8422988 | R3HCC1   | protein_coding |
| 0,9998478 | GSR      | protein_coding |
| 0,9465232 | PPP2CB   | protein_coding |
| 0,4894579 | TUSC3    | protein_coding |
| 0,4919121 | MCM4     | protein_coding |
| 0,2146641 | KCTD9    | protein_coding |
| 0,8786805 | ASAH1    | protein_coding |
| 0,4911389 | BNIP3L   | protein_coding |
| 0,8786805 | MAN2B1   | protein_coding |
| 0,9771336 | NUCB1    | protein_coding |
| 0,8991816 | GYS1     | protein_coding |
| 0,7968733 | ECH1     | protein_coding |
| 0,9081173 | HNRNPL   | protein_coding |
| 0,6663173 | SNRNP70  | protein_coding |
| 0,645515  | CLPTM1   | protein_coding |
| 0,8116293 | FCGRT    | protein_coding |
| 0,9975676 | PIH1D1   | protein_coding |
| 0,3803906 | CKM      | protein_coding |
| 0,6613295 | PPP1R13L | protein_coding |
| 0,7095541 | OAZ1     | protein_coding |
| 0,8255851 | DMPK     | protein_coding |
| 0,5537742 | TLE5     | protein_coding |
| 0,9327336 | SGTA     | protein_coding |
| 0,6591549 | C19orf53 | protein_coding |
| 0,3697716 | TIMM44   | protein_coding |
| 0,9808899 | VRK3     | protein_coding |
| 0,891947  | FAM32A   | protein_coding |
| 0,7934256 | AKAP8    | protein_coding |
| 0,7835684 | ILVBL    | protein_coding |
| 0,9766993 | ZNF419   | protein_coding |
| 0,4954628 | POP4     | protein_coding |
| 0,8919058 | URI1     | protein_coding |
| 0,1916186 | PDCD5    | protein_coding |
| 0,6184746 | ANKRD27  | protein_coding |
| 0,8790123 | RPS16    | protein_coding |
| 0,645515  | TIMM50   | protein_coding |
| 0,8229361 | FBL      | protein_coding |
| 0,8117718 | GPI      | protein_coding |
| 0,8289966 | AKT2     | protein_coding |
| 0,8782347 | PLD3     | protein_coding |
| 0,8500846 | TBCB     | protein_coding |
| 0,9296784 | SLC1A5   | protein_coding |
| 0,8161522 | HNRNPUL1 | protein_coding |

|           |         |                |
|-----------|---------|----------------|
| 0,6261617 | DENND3  | protein_coding |
| 0,4684923 | DMAC2   | protein_coding |
| 0,8221205 | MYH14   | protein_coding |
| 0,6888062 | RPS19   | protein_coding |
| 0,5558351 | NOP53   | protein_coding |
| 0,7940988 | ETFB    | protein_coding |
| 0,9738194 | TYK2    | protein_coding |
| 0,6140495 | CDC37   | protein_coding |
| 0,8439769 | NAPA    | protein_coding |
| 0,7296863 | PTPRS   | protein_coding |
| 0,7894641 | MEGF8   | protein_coding |
| 0,8138179 | KDELRL1 | protein_coding |
| 0,5094678 | CYTH2   | protein_coding |
| 0,993752  | CARD8   | protein_coding |
| 0,7716654 | ZNF175  | protein_coding |
| 0,505053  | PLA2G4C | protein_coding |
| 0,9752796 | BCAT2   | protein_coding |
| 0,8436853 | PPP2R1A | protein_coding |
| 0,5024483 | TNPO2   | protein_coding |
| 0,0677818 | LILRB5  | protein_coding |
| 0,6701082 | RPL18A  | protein_coding |
| 0,3327196 | TMEM147 | protein_coding |
| 0,7805908 | USF2    | protein_coding |
| 0,9002008 | KXD1    | protein_coding |
| 0,8665655 | FKBP8   | protein_coding |
| 0,8137923 | ZNF14   | protein_coding |
| 0,7661133 | SCN1B   | protein_coding |
| 0,9700303 | AVL9    | protein_coding |
| 0,702199  | CFAP69  | protein_coding |
| 0,8711676 | GTPBP10 | protein_coding |
| 0,5964345 | RASA4   | protein_coding |
| 0,6037819 | CDK6    | protein_coding |
| 0,7444016 | PMPCB   | protein_coding |
| 0,6766513 | DNAJC2  | protein_coding |
| 0,9484395 | BET1    | protein_coding |
| 0,6333516 | NAMPT   | protein_coding |
| 0,768388  | TWISTNB | protein_coding |
| 0,6003589 | PIK3CG  | protein_coding |
| 0,3089797 | PON2    | protein_coding |
| 0,4307688 | ITGB8   | protein_coding |
| 0,887319  | HBP1    | protein_coding |
| 0,9410184 | SP4     | protein_coding |
| 0,9738194 | DNAH11  | protein_coding |
| 0,8500846 | CBLL1   | protein_coding |
| 0,8597029 | MTPN    | protein_coding |
| 0,3694563 | PTN     | protein_coding |
| 0,615864  | MPP6    | protein_coding |
| 0,3194617 | ZC3HAV1 | protein_coding |
| 0,7639764 | OGDH    | protein_coding |
| 0,6138613 | H2AFV   | protein_coding |
| 0,8189129 | CAV2    | protein_coding |
| 0,5647201 | CAV1    | protein_coding |
| 0,5552067 | MET     | protein_coding |
| 0,3004311 | LMBR1   | protein_coding |
| 0,9730672 | DNAJB6  | protein_coding |
| 0,8875885 | IQCE    | protein_coding |
| 0,6718649 | TSPAN12 | protein_coding |
| 0,1888441 | SSBP1   | protein_coding |
| 0,2512796 | CPED1   | protein_coding |

|           |          |                                    |
|-----------|----------|------------------------------------|
| 0,4638153 | HIBADH   | protein_coding                     |
| 0,5224131 | TAX1BP1  | protein_coding                     |
| 0,9374881 | CPVL     | protein_coding                     |
| 0,9998538 | GRB10    | protein_coding                     |
| 0,4835164 | COBL     | protein_coding                     |
| 0,9994633 | FKBP14   | protein_coding                     |
| 0,7355144 | PLEKHA8  | protein_coding                     |
| 0,7445906 | NOD1     | protein_coding                     |
| 0,37039   | GARS     | protein_coding                     |
| 0,9922409 | CASP2    | protein_coding                     |
| 0,4593782 | CHCHD2   | protein_coding                     |
| 0,8111375 | HSPB1    | protein_coding                     |
| 0,8702296 | PDAP1    | protein_coding                     |
| 0,9136442 | BUD31    | protein_coding                     |
| 0,8992483 | CYP3A5   | protein_coding                     |
| 0,4467509 | ZKSCAN1  | protein_coding                     |
| 0,938611  | EIF3B    | protein_coding                     |
| 0,8578793 | WASL     | protein_coding                     |
| 0,458152  | RBM28    | protein_coding                     |
| 0,4894579 | LSM5     | protein_coding                     |
| 0,0908653 | SERPINE1 | protein_coding                     |
| 0,654521  | C1GALT1  | protein_coding                     |
| 0,9338281 | PLOD3    | protein_coding                     |
| 0,8553175 | RPA3     | protein_coding                     |
| 0,8160828 | ZNHIT1   | protein_coding                     |
| 0,9951314 | PHF14    | protein_coding                     |
| 0,7816527 | NRF1     | protein_coding                     |
| 0,6785825 | TMEM106B | protein_coding                     |
| 0,5362266 | ZNF862   | protein_coding                     |
| 0,654521  | MEST     | protein_coding                     |
| 0,481646  | MEOX2    | protein_coding                     |
| 0,7027821 | ANKMY2   | protein_coding                     |
| 0,330331  | TSPAN13  | protein_coding                     |
| 0,4959869 | RARRES2  | protein_coding                     |
| 0,8992483 | AHR      | protein_coding                     |
| 0,0560697 | CHCHD3   | protein_coding                     |
| 0,7114715 | TMEM176B | protein_coding                     |
| 0,3327196 | MRPL32   | protein_coding                     |
| 0,1431468 | COA1     | protein_coding                     |
| 0,435547  | BLVRA    | protein_coding                     |
| 0,5531846 | URGCP    | protein_coding                     |
| 0,3803906 | TMEM248  | protein_coding                     |
| 0,4835164 | STAG3L4  | transcribed_unprocessed_pseudogene |
| 0,4344705 | RHEB     | protein_coding                     |
| 0,9360339 | PRKAG2   | protein_coding                     |
| 0,2908312 | AEBP1    | protein_coding                     |
| 0,9628671 | POLD2    | protein_coding                     |
| 0,5879554 | MYL7     | protein_coding                     |
| 0,6563172 | BCL7B    | protein_coding                     |
| 0,8622295 | YKT6     | protein_coding                     |
| 0,4551386 | TBL2     | protein_coding                     |
| 0,8924025 | EIF4H    | protein_coding                     |
| 0,9771336 | FKTN     | protein_coding                     |
| 0,9925374 | FSD1L    | protein_coding                     |
| 0,3316892 | CNTNAP3  | protein_coding                     |
| 0,5170218 | SPIN1    | protein_coding                     |
| 0,5249842 | NMRK1    | protein_coding                     |
| 0,7805908 | TMEM245  | protein_coding                     |
| 0,7558125 | PRUNE2   | protein_coding                     |

|           |           |                |
|-----------|-----------|----------------|
| 0,6904615 | MEGF9     | protein_coding |
| 0,7032369 | TGFBR1    | protein_coding |
| 0,9771336 | SEC61B    | protein_coding |
| 0,284683  | OGN       | protein_coding |
| 0,0796818 | ASPN      | protein_coding |
| 0,1112135 | ECM2      | protein_coding |
| 0,284683  | TLE4      | protein_coding |
| 0,4808891 | PTGR1     | protein_coding |
| 0,949756  | SUSD1     | protein_coding |
| 0,7456311 | AKNA      | protein_coding |
| 0,4638153 | ENG       | protein_coding |
| 0,2146641 | AK1       | protein_coding |
| 0,8823913 | CDC37L1   | protein_coding |
| 0,1653531 | PLGRKT    | protein_coding |
| 0,9781971 | TBC1D13   | protein_coding |
| 0,9464798 | RIC1      | protein_coding |
| 0,8118765 | KDM4C     | protein_coding |
| 0,9205351 | DOCK8     | protein_coding |
| 0,4806087 | KANK1     | protein_coding |
| 0,4519396 | FUBP3     | protein_coding |
| 0,7740102 | TYRP1     | protein_coding |
| 0,9551307 | CREB3     | protein_coding |
| 0,8252207 | RGP1      | protein_coding |
| 0,6238595 | MPDZ      | protein_coding |
| 0,8189129 | DDX58     | protein_coding |
| 0,776038  | EDF1      | protein_coding |
| 0,2146641 | PIP5K1B   | protein_coding |
| 0,6425736 | GLIS3     | protein_coding |
| 0,4835164 | BAG1      | protein_coding |
| 0,7296863 | RAPGEF1   | protein_coding |
| 0,9033043 | SETX      | protein_coding |
| 0,8189129 | PTGDS     | protein_coding |
| 0,6785825 | ABCA2     | protein_coding |
| 0,8532945 | UBE2R2    | protein_coding |
| 0,8500846 | ABHD17B   | protein_coding |
| 0,9804708 | EXOSC3    | protein_coding |
| 0,8172545 | ZFAND5    | protein_coding |
| 0,6021768 | PDLIM1    | protein_coding |
| 0,9248086 | CCNJ      | protein_coding |
| 0,8067508 | HPS1      | protein_coding |
| 0,8721867 | PHYH      | protein_coding |
| 0,855954  | RASSF4    | protein_coding |
| 0,9768456 | DNMBP     | protein_coding |
| 0,9450135 | RAB11FIP2 | protein_coding |
| 0,4806087 | CXCL12    | protein_coding |
| 0,544397  | ERLIN1    | protein_coding |
| 0,6511285 | EIF3A     | protein_coding |
| 0,6828036 | TRDMT1    | protein_coding |
| 0,9248086 | DDX50     | protein_coding |
| 0,9700557 | MAPK8     | protein_coding |
| 0,8930727 | SEC23IP   | protein_coding |
| 0,5558351 | ATE1      | protein_coding |
| 0,8330359 | NSMCE4A   | protein_coding |
| 0,8176511 | PLEKHA1   | protein_coding |
| 0,2948143 | UNC5B     | protein_coding |
| 0,9538818 | VSIR      | protein_coding |
| 0,2347224 | SPOCK2    | protein_coding |
| 0,8495694 | MICU1     | protein_coding |
| 0,9112805 | PPP3CB    | protein_coding |

|           |          |                |
|-----------|----------|----------------|
| 0,9759101 | CCSER2   | protein_coding |
| 0,9902795 | BMPR1A   | protein_coding |
| 0,1112135 | ACTA2    | protein_coding |
| 0,669182  | LIPA     | protein_coding |
| 0,5040596 | LZTS2    | protein_coding |
| 0,4788751 | SFXN3    | protein_coding |
| 0,9528194 | FBXW4    | protein_coding |
| 0,620901  | TNKS2    | protein_coding |
| 0,7661133 | GBF1     | protein_coding |
| 0,4954628 | ARHGAP21 | protein_coding |
| 0,8373584 | CPEB3    | protein_coding |
| 0,9291102 | CUEDC2   | protein_coding |
| 0,5558351 | ANKRD26  | protein_coding |
| 0,8714772 | ACBD5    | protein_coding |
| 0,9621856 | LARP4B   | protein_coding |
| 0,4894579 | GTPBP4   | protein_coding |
| 0,8153751 | EDRF1    | protein_coding |
| 0,5212854 | BCCIP    | protein_coding |
| 0,6638064 | MTPAP    | protein_coding |
| 0,9738194 | SH3PXD2A | protein_coding |
| 0,8274305 | PITRM1   | protein_coding |
| 0,9917279 | STN1     | protein_coding |
| 0,887319  | MAP3K8   | protein_coding |
| 0,4746597 | EBF3     | protein_coding |
| 0,2539546 | GLRX3    | protein_coding |
| 0,9185201 | TASOR2   | protein_coding |
| 0,6319662 | XPNPEP1  | protein_coding |
| 0,9463928 | SMC3     | protein_coding |
| 0,749866  | SHOC2    | protein_coding |
| 0,8831146 | TFAM     | protein_coding |
| 0,9928407 | CCDC6    | protein_coding |
| 0,8259599 | CUL2     | protein_coding |
| 0,2337466 | CCNY     | protein_coding |
| 0,8117718 | RPL28    | protein_coding |
| 0,8992483 | ZMIZ1    | protein_coding |
| 0,3772742 | PPIF     | protein_coding |
| 0,4626741 | TSPAN14  | protein_coding |
| 0,5558351 | TBC1D12  | protein_coding |
| 0,8041431 | NUFIP2   | protein_coding |
| 0,9378237 | GIT1     | protein_coding |
| 0,5474737 | RPL19    | protein_coding |
| 0,4165098 | FBXL20   | protein_coding |
| 0,3358222 | UBTF     | protein_coding |
| 0,8930787 | PSMD3    | protein_coding |
| 0,6854132 | CASC3    | protein_coding |
| 0,5024483 | RAD51C   | protein_coding |
| 0,9925196 | SEPTIN4  | protein_coding |
| 0,8176787 | MTMR4    | protein_coding |
| 0,572303  | TRIM37   | protein_coding |
| 0,7393702 | DHX40    | protein_coding |
| 0,7894641 | KPNB1    | protein_coding |
| 0,7444016 | GOSR2    | protein_coding |
| 0,9738194 | PNPO     | protein_coding |
| 0,9003006 | RPS6KB1  | protein_coding |
| 0,747834  | CBX1     | protein_coding |
| 0,587388  | INTS2    | protein_coding |
| 0,5365997 | MED13    | protein_coding |
| 0,1712026 | ENO3     | protein_coding |
| 0,9039795 | PFN1     | protein_coding |

|           |          |                |
|-----------|----------|----------------|
| 0,5793003 | RNF167   | protein_coding |
| 0,7542355 | SLC25A11 | protein_coding |
| 0,6887681 | NUP88    | protein_coding |
| 0,2778507 | C1QBP    | protein_coding |
| 0,6144866 | BLMH     | protein_coding |
| 0,4835164 | CPD      | protein_coding |
| 0,6927966 | GOSR1    | protein_coding |
| 0,2560075 | CCDC47   | protein_coding |
| 0,9922688 | DRG2     | protein_coding |
| 0,5180247 | FTSJ3    | protein_coding |
| 0,8698319 | AKAP10   | protein_coding |
| 0,7956408 | SMARCD2  | protein_coding |
| 0,7136899 | SYNGR2   | protein_coding |
| 0,4971845 | UTP6     | protein_coding |
| 0,8823093 | DDX5     | protein_coding |
| 0,696332  | C17orf75 | protein_coding |
| 0,5651785 | CYTH1    | protein_coding |
| 0,4151093 | PSMD11   | protein_coding |
| 0,7230802 | LGALS3BP | protein_coding |
| 0,9081173 | CCL2     | protein_coding |
| 0,9385376 | KAT2A    | protein_coding |
| 0,330331  | MLX      | protein_coding |
| 0,50493   | EZH1     | protein_coding |
| 0,6227414 | COL1A1   | protein_coding |
| 0,9781971 | SGCA     | protein_coding |
| 0,0606893 | MRPL27   | protein_coding |
| 0,9828271 | VAT1     | protein_coding |
| 0,9759101 | LRRC59   | protein_coding |
| 0,5456715 | HDAC5    | protein_coding |
| 0,9450135 | LUC7L3   | protein_coding |
| 0,3515446 | SMURF2   | protein_coding |
| 0,9206489 | DUSP3    | protein_coding |
| 0,9010513 | EFTUD2   | protein_coding |
| 0,182619  | HLF      | protein_coding |
| 0,7190863 | PRKAR1A  | protein_coding |
| 0,3607643 | FAM20A   | protein_coding |
| 0,6160654 | YWHAE    | protein_coding |
| 0,4835164 | MMD      | protein_coding |
| 0,9535694 | MAP2K6   | protein_coding |
| 0,2281984 | DHRS7B   | protein_coding |
| 0,9998478 | WSB1     | protein_coding |
| 0,3607643 | VTN      | protein_coding |
| 0,8330359 | TNFAIP1  | protein_coding |
| 0,0727176 | PMP22    | protein_coding |
| 0,1712026 | ALDOC    | protein_coding |
| 0,620901  | SUPT6H   | protein_coding |
| 0,3030424 | RAB34    | protein_coding |
| 0,887319  | PHF12    | protein_coding |
| 0,9953531 | TMEM33   | protein_coding |
| 0,727014  | SLAIN2   | protein_coding |
| 0,4835164 | OCIAD1   | protein_coding |
| 0,9312186 | DCUN1D4  | protein_coding |
| 0,8829558 | USP46    | protein_coding |
| 0,6761449 | LAMTOR3  | protein_coding |
| 0,4835164 | NFKB1    | protein_coding |
| 0,4161706 | MANBA    | protein_coding |
| 0,6790658 | UBE2D3   | protein_coding |
| 0,5723744 | MAPK10   | protein_coding |
| 0,9778442 | ELF2     | protein_coding |

|           |          |                |
|-----------|----------|----------------|
| 0,1670869 | NDUFC1   | protein_coding |
| 0,3194617 | TBC1D9   | protein_coding |
| 0,4778798 | ZNF330   | protein_coding |
| 0,9438763 | INPP4B   | protein_coding |
| 0,9442712 | GAB1     | protein_coding |
| 0,9669517 | KLHL2    | protein_coding |
| 0,4783874 | CPE      | protein_coding |
| 0,8373584 | RPL34    | protein_coding |
| 0,9951314 | WFS1     | protein_coding |
| 0,3155884 | GRPEL1   | protein_coding |
| 0,5117223 | FRG1     | protein_coding |
| 0,2870346 | CLCN3    | protein_coding |
| 0,9082846 | GALNT7   | protein_coding |
| 0,5679388 | DHX15    | protein_coding |
| 0,9953531 | SEPSECS  | protein_coding |
| 0,9645236 | TRIM2    | protein_coding |
| 0,6371005 | FBXW7    | protein_coding |
| 0,5313262 | TBC1D19  | protein_coding |
| 0,7639764 | NSD2     | protein_coding |
| 0,4835164 | SH3D19   | protein_coding |
| 0,7611529 | STIM2    | protein_coding |
| 0,6609893 | GLRB     | protein_coding |
| 0,9578269 | RAPGEF2  | protein_coding |
| 0,9680323 | SNX25    | protein_coding |
| 0,645515  | LRP2BP   | protein_coding |
| 0,7558125 | UFSP2    | protein_coding |
| 0,8422988 | KLF3     | protein_coding |
| 0,8614902 | KLHL5    | protein_coding |
| 0,6140495 | UGDH     | protein_coding |
| 0,7369294 | PPARGC1A | protein_coding |
| 0,8885864 | CRYAB    | protein_coding |
| 0,3520154 | HTATIP2  | protein_coding |
| 0,7211115 | CTSC     | protein_coding |
| 0,9296784 | ZBTB16   | protein_coding |
| 0,7767291 | ELP4     | protein_coding |
| 0,9998478 | ZPR1     | protein_coding |
| 0,1674733 | MTCH2    | protein_coding |
| 0,6419483 | FNBP4    | protein_coding |
| 0,9428271 | SC5D     | protein_coding |
| 0,9459932 | HSPA8    | protein_coding |
| 0,4809815 | VWA5A    | protein_coding |
| 0,2529607 | SIAE     | protein_coding |
| 0,9768456 | EHD1     | protein_coding |
| 0,4475789 | OSBP     | protein_coding |
| 0,692146  | KMT5B    | protein_coding |
| 0,6591127 | FOXRED1  | protein_coding |
| 0,6184079 | PPP6R3   | protein_coding |
| 0,5647201 | MS4A6A   | protein_coding |
| 0,0895372 | MS4A4A   | protein_coding |
| 0,373012  | ST3GAL4  | protein_coding |
| 0,6563172 | CPT1A    | protein_coding |
| 0,0868691 | CCND1    | protein_coding |
| 0,9925374 | PRPF19   | protein_coding |
| 0,9998478 | TMEM109  | protein_coding |
| 0,8908494 | CHORDC1  | protein_coding |
| 0,6044343 | PANX1    | protein_coding |
| 0,7211115 | ARHGEF17 | protein_coding |
| 0,5011485 | CEP164   | protein_coding |
| 0,7245119 | RNF141   | protein_coding |

|           |          |                |
|-----------|----------|----------------|
| 0,768388  | CEP126   | protein_coding |
| 0,9626169 | EIF4G2   | protein_coding |
| 0,9205351 | IL10RA   | protein_coding |
| 0,6238595 | GALNT18  | protein_coding |
| 0,9341044 | BIRC2    | protein_coding |
| 0,716221  | UBE4A    | protein_coding |
| 0,5296182 | DDX6     | protein_coding |
| 0,7468242 | CBL      | protein_coding |
| 0,5478951 | HIPK3    | protein_coding |
| 0,8698319 | FBXO3    | protein_coding |
| 0,3860206 | PDHX     | protein_coding |
| 0,3335334 | COMMD9   | protein_coding |
| 0,5393446 | ACCS     | protein_coding |
| 0,7546576 | AMBRA1   | protein_coding |
| 0,9855435 | MADD     | protein_coding |
| 0,6137496 | NAA40    | protein_coding |
| 0,4599193 | CARS     | protein_coding |
| 0,7321942 | CD81     | protein_coding |
| 0,1712026 | C11orf21 | protein_coding |
| 0,5267449 | SOX6     | protein_coding |
| 0,9808899 | C11orf58 | protein_coding |
| 0,8885864 | RPS13    | protein_coding |
| 0,9312186 | NUP98    | protein_coding |
| 0,6662006 | NDUFS8   | protein_coding |
| 0,9817008 | CHKA     | protein_coding |
| 0,8118765 | HPS5     | protein_coding |
| 0,9707377 | GTF2H1   | protein_coding |
| 0,472118  | VWF      | protein_coding |
| 0,4971178 | PPFIBP1  | protein_coding |
| 0,8883426 | PRDM4    | protein_coding |
| 0,9802452 | CLEC2B   | protein_coding |
| 0,3358222 | COQ5     | protein_coding |
| 0,7558125 | CORO1C   | protein_coding |
| 0,9928407 | CAPRIN2  | protein_coding |
| 0,7118106 | KCTD10   | protein_coding |
| 0,2393106 | SLC11A2  | protein_coding |
| 0,864196  | MLEC     | protein_coding |
| 0,9064657 | CSRNP2   | protein_coding |
| 0,7558125 | CAMKK2   | protein_coding |
| 0,5265966 | ATP5F1B  | protein_coding |
| 0,9829971 | PTGES3   | protein_coding |
| 0,231981  | BCL7A    | protein_coding |
| 0,6408377 | RSRC2    | protein_coding |
| 0,7456311 | LIN7A    | protein_coding |
| 0,9953531 | ACSS3    | protein_coding |
| 0,8189129 | TNS2     | protein_coding |
| 0,4879925 | METAP2   | protein_coding |
| 0,8458063 | LTA4H    | protein_coding |
| 0,9428271 | ELK3     | protein_coding |
| 0,8917289 | MAGOHB   | protein_coding |
| 0,8865445 | ITFG2    | protein_coding |
| 0,9925374 | PARP11   | protein_coding |
| 0,7748443 | ARPC3    | protein_coding |
| 0,6462349 | GPN3     | protein_coding |
| 0,3513961 | VPS29    | protein_coding |
| 0,8189129 | MYL2     | protein_coding |
| 0,9142106 | SH2B3    | protein_coding |
| 0,284683  | DUSP16   | protein_coding |
| 0,446175  | CREBL2   | protein_coding |



|           |           |                |
|-----------|-----------|----------------|
| 0,8912641 | ACAD10    | protein_coding |
| 0,931978  | ALDH2     | protein_coding |
| 0,1712026 | CDKN1B    | protein_coding |
| 0,3953915 | NAA25     | protein_coding |
| 0,7204811 | LTBR      | protein_coding |
| 0,4161706 | CDK2AP1   | protein_coding |
| 0,2908312 | OAS3      | protein_coding |
| 0,5677206 | OAS2      | protein_coding |
| 0,3159229 | MGP       | protein_coding |
| 0,8866985 | ARHGDIB   | protein_coding |
| 0,8545769 | GTF2H3    | protein_coding |
| 0,8997937 | EIF2B1    | protein_coding |
| 0,645515  | SLC38A1   | protein_coding |
| 0,7280026 | C12orf49  | protein_coding |
| 0,887128  | STX2      | protein_coding |
| 0,8555218 | ADGRD1    | protein_coding |
| 0,6430147 | COPZ1     | protein_coding |
| 0,6790658 | CAND1     | protein_coding |
| 0,8888845 | RAB5B     | protein_coding |
| 0,5647201 | MDM1      | protein_coding |
| 0,7558125 | NUP107    | protein_coding |
| 0,8118149 | CNOT2     | protein_coding |
| 0,914514  | CPSF6     | protein_coding |
| 0,6333516 | KRR1      | protein_coding |
| 0,1606381 | MRPL51    | protein_coding |
| 0,6491869 | GAPDH     | protein_coding |
| 0,9535559 | CHD4      | protein_coding |
| 0,6745473 | UHRF1BP1L | protein_coding |
| 0,9576401 | COPS7A    | protein_coding |
| 0,721162  | ING4      | protein_coding |
| 0,1080307 | CHPT1     | protein_coding |
| 0,7125689 | USP5      | protein_coding |
| 0,2834613 | TPI1      | protein_coding |
| 0,7118106 | GNPTAB    | protein_coding |
| 0,5011485 | ENO2      | protein_coding |
| 0,8554227 | ATN1      | protein_coding |
| 0,4806087 | SUDS3     | protein_coding |
| 0,9933479 | GOLT1B    | protein_coding |
| 0,4593782 | LDHB      | protein_coding |
| 0,933129  | PRKAB1    | protein_coding |
| 0,7748443 | CMAS      | protein_coding |
| 0,9621537 | HCFC2     | protein_coding |
| 0,9248086 | C2CD5     | protein_coding |
| 0,9914435 | RAB35     | protein_coding |
| 0,6903585 | PHC1      | protein_coding |
| 0,8021601 | COX6A1    | protein_coding |
| 0,9112805 | RIC8B     | protein_coding |
| 0,841477  | SRSF9     | protein_coding |
| 0,8875885 | FGFR1OP2  | protein_coding |
| 0,5608916 | COL12A1   | protein_coding |
| 0,3737635 | BTN3A3    | protein_coding |
| 0,9296784 | TDP2      | protein_coding |
| 0,6867028 | FRK       | protein_coding |
| 0,7298242 | DSE       | protein_coding |
| 0,2945575 | RWDD1     | protein_coding |
| 0,9908528 | TMEM14C   | protein_coding |
| 0,4911389 | PAK1IP1   | protein_coding |
| 0,0868691 | GCNT2     | protein_coding |
| 0,7743102 | SMIM8     | protein_coding |

|           |         |                |
|-----------|---------|----------------|
| 0,7318327 | NEDD9   | protein_coding |
| 0,2088169 | CEP85L  | protein_coding |
| 0,4779616 | ASF1A   | protein_coding |
| 0,8153751 | MCM9    | protein_coding |
| 0,8511804 | RNGTT   | protein_coding |
| 0,7558125 | MAN1A1  | protein_coding |
| 0,7118106 | SERINC1 | protein_coding |
| 0,1225394 | HDDC2   | protein_coding |
| 0,1067405 | TPD52L1 | protein_coding |
| 0,7558125 | HINT3   | protein_coding |
| 0,4835164 | NCOA7   | protein_coding |
| 0,9494633 | SASH1   | protein_coding |
| 0,0561363 | MTRF1L  | protein_coding |
| 0,9700303 | MAPK14  | protein_coding |
| 0,9887908 | KCTD20  | protein_coding |
| 0,7010516 | STK38   | protein_coding |
| 0,7956408 | SRSF3   | protein_coding |
| 0,9933219 | SOD2    | protein_coding |
| 0,2834613 | MRPL18  | protein_coding |
| 0,998169  | MCM3    | protein_coding |
| 0,7197731 | RNF8    | protein_coding |
| 0,6285359 | PHACTR1 | protein_coding |
| 0,3811175 | ICK     | protein_coding |
| 0,7087026 | FBXO9   | protein_coding |
| 0,9962215 | MDN1    | protein_coding |
| 0,7634906 | RBM24   | protein_coding |
| 0,7203736 | CAP2    | protein_coding |
| 0,8992483 | ZNF451  | protein_coding |
| 0,4593782 | BAG2    | protein_coding |
| 0,34092   | RAB23   | protein_coding |
| 0,9778442 | FBXL4   | protein_coding |
| 0,9669517 | CCNC    | protein_coding |
| 0,9496064 | E2F3    | protein_coding |
| 0,9928407 | ASCC3   | protein_coding |
| 0,8062191 | BVES    | protein_coding |
| 0,9998478 | MED23   | protein_coding |
| 0,5456715 | ALDH5A1 | protein_coding |
| 0,9678404 | CRYBG1  | protein_coding |
| 0,0839464 | ACOT13  | protein_coding |
| 0,8695843 | SMAP1   | protein_coding |
| 0,7987424 | RPS12   | protein_coding |
| 0,4958925 | C6orf62 | protein_coding |
| 0,7940001 | EYA4    | protein_coding |
| 0,9977992 | SOBP    | protein_coding |
| 0,5768837 | SNX3    | protein_coding |
| 0,5052075 | HBS1L   | protein_coding |
| 0,749866  | TRIM38  | protein_coding |
| 0,9583561 | FIG4    | protein_coding |
| 0,5985056 | PERP    | protein_coding |
| 0,4219373 | ARFGEF3 | protein_coding |
| 0,645515  | HECA    | protein_coding |
| 0,3256015 | ADGRG6  | protein_coding |
| 0,5953643 | PHACTR2 | protein_coding |
| 0,7464528 | EPM2A   | protein_coding |
| 0,9792506 | SLC39A7 | protein_coding |
| 0,9156816 | PHF1    | protein_coding |
| 0,904174  | CUTA    | protein_coding |
| 0,8588806 | QKI     | protein_coding |
| 0,6442182 | PDE10A  | protein_coding |

|           |         |                |
|-----------|---------|----------------|
| 0,6279799 | SMOC2   | protein_coding |
| 0,8114908 | CCND3   | protein_coding |
| 0,8461755 | FAM120B | protein_coding |
| 0,4834958 | BICRAL  | protein_coding |
| 0,9410289 | PPP2R5D | protein_coding |
| 0,8847411 | SRF     | protein_coding |
| 0,6999614 | CUL9    | protein_coding |
| 0,1067405 | DUSP22  | protein_coding |
| 0,8992483 | EXOC2   | protein_coding |
| 0,4298619 | COX7A2  | protein_coding |
| 0,9081173 | TMEM30A | protein_coding |
| 0,9151358 | SENP6   | protein_coding |
| 0,7956408 | VEGFA   | protein_coding |
| 0,8885864 | PRPF4B  | protein_coding |
| 0,9465232 | SLC29A1 | protein_coding |
| 0,7431973 | BTN2A1  | protein_coding |
| 0,4020941 | LAMA4   | protein_coding |
| 0,9755908 | TENT5A  | protein_coding |
| 0,9535559 | CLIC5   | protein_coding |
| 0,0998266 | TBX18   | protein_coding |
| 0,9847107 | ERBIN   | protein_coding |
| 0,9998538 | HARS2   | protein_coding |
| 0,4521055 | NUDT12  | protein_coding |
| 0,8346156 | MAN2A1  | protein_coding |
| 0,9802452 | SEMA5A  | protein_coding |
| 0,441257  | C7      | protein_coding |
| 0,7118106 | TENT4A  | protein_coding |
| 0,9481776 | GHR     | protein_coding |
| 0,713782  | HMGCS1  | protein_coding |
| 0,4105939 | DAP     | protein_coding |
| 0,6459868 | BRD8    | protein_coding |
| 0,7431559 | NNT     | protein_coding |
| 0,7122873 | MRPS30  | protein_coding |
| 0,6762366 | HSPA9   | protein_coding |
| 0,8725749 | MRPS27  | protein_coding |
| 0,6184746 | PFDN1   | protein_coding |
| 0,4585504 | HBEGF   | protein_coding |
| 0,3792977 | LOX     | protein_coding |
| 0,2629376 | SPARC   | protein_coding |
| 0,9865636 | IK      | protein_coding |
| 0,9768456 | HMGCR   | protein_coding |
| 0,7444016 | CERT1   | protein_coding |
| 0,8818298 | FAF2    | protein_coding |
| 0,4933888 | PDE8B   | protein_coding |
| 0,7006869 | CLK4    | protein_coding |
| 0,8422988 | RNF130  | protein_coding |
| 0,3907697 | ARSB    | protein_coding |
| 0,4835164 | CLINT1  | protein_coding |
| 0,71754   | THBS4   | protein_coding |
| 0,9481776 | CNOT6   | protein_coding |
| 0,2971924 | TTC1    | protein_coding |
| 0,3424108 | MSH3    | protein_coding |
| 0,2737133 | RASGRF2 | protein_coding |
| 0,7467854 | CCNG1   | protein_coding |
| 0,7968733 | DROSHA  | protein_coding |
| 0,9951314 | ARRDC3  | protein_coding |
| 0,9731251 | GOLPH3  | protein_coding |
| 0,7816527 | SUB1    | protein_coding |
| 0,0088417 | NPR3    | protein_coding |

|           |          |                |
|-----------|----------|----------------|
| 0,998169  | FAM172A  | protein_coding |
| 0,0088417 | SLC27A6  | protein_coding |
| 0,7607016 | TARS     | protein_coding |
| 0,99108   | LNPEP    | protein_coding |
| 0,1986027 | PDE4D    | protein_coding |
| 0,0149003 | RAD1     | protein_coding |
| 0,5356307 | BRIX1    | protein_coding |
| 0,9954421 | SLC12A7  | protein_coding |
| 0,9768456 | ST8SIA4  | protein_coding |
| 0,9484395 | GNPDA1   | protein_coding |
| 0,9781971 | PCDH12   | protein_coding |
| 0,8003414 | SKP1     | protein_coding |
| 0,9579484 | NUP155   | protein_coding |
| 0,9998478 | PPP2CA   | protein_coding |
| 0,5268876 | FGF1     | protein_coding |
| 0,492696  | NR3C1    | protein_coding |
| 0,8238032 | C5orf15  | protein_coding |
| 0,7740102 | PPWD1    | protein_coding |
| 0,7743102 | LIFR     | protein_coding |
| 0,8229361 | TRIM23   | protein_coding |
| 0,4894579 | TRAPPC13 | protein_coding |
| 0,4532937 | SEC24A   | protein_coding |
| 0,2506935 | TXNDC15  | protein_coding |
| 0,8545769 | TTC33    | protein_coding |
| 0,8721281 | RARS     | protein_coding |
| 0,3830886 | H2AFY    | protein_coding |
| 0,4954628 | TCERG1   | protein_coding |
| 0,8281575 | DPYSL3   | protein_coding |
| 0,9765371 | SMAD5    | protein_coding |
| 0,645515  | CSNK1A1  | protein_coding |
| 0,9974735 | HMGXB3   | protein_coding |
| 0,9621537 | ERGIC1   | protein_coding |
| 0,9840915 | PDGFRB   | protein_coding |
| 0,620901  | ATP6V0E1 | protein_coding |
| 0,0375734 | STC2     | protein_coding |
| 0,9450135 | CPEB4    | protein_coding |
| 0,2318378 | HRH2     | protein_coding |
| 0,3803906 | DBN1     | protein_coding |
| 0,8381234 | EHHADH   | protein_coding |
| 0,3694563 | SMC4     | protein_coding |
| 0,4919121 | SELENOK  | protein_coding |
| 0,7154026 | ACTR8    | protein_coding |
| 0,2440137 | TIMMDC1  | protein_coding |
| 0,8422988 | CRBN     | protein_coding |
| 0,1528801 | BCL6     | protein_coding |
| 0,8275847 | NPHP3    | protein_coding |
| 0,4599193 | AMOTL2   | protein_coding |
| 0,2068936 | NIT2     | protein_coding |
| 0,2731548 | FAM162A  | protein_coding |
| 0,8561022 | KPNA1    | protein_coding |
| 0,9465232 | PCCB     | protein_coding |
| 0,9450135 | UBE3A    | protein_coding |
| 0,3513961 | ARMC8    | protein_coding |
| 0,7611529 | CEP70    | protein_coding |
| 0,6766513 | SLC25A36 | protein_coding |
| 0,9998478 | RNF7     | protein_coding |
| 0,645515  | TFDP2    | protein_coding |
| 0,9997554 | XRN1     | protein_coding |
| 0,5953643 | KAT2B    | protein_coding |

|           |          |                |
|-----------|----------|----------------|
| 0,7397205 | BCHE     | protein_coding |
| 0,5510556 | PDCD10   | protein_coding |
| 0,6664224 | FGF12    | protein_coding |
| 0,9717962 | PRKAR2A  | protein_coding |
| 0,0903439 | HES1     | protein_coding |
| 0,9727051 | USP4     | protein_coding |
| 0,8422988 | ACAP2    | protein_coding |
| 0,5029234 | ECT2     | protein_coding |
| 0,9176029 | GNAI2    | protein_coding |
| 0,9478428 | TFG      | protein_coding |
| 0,9619323 | USP9Y    | protein_coding |
| 0,2073391 | HYAL1    | protein_coding |
| 0,4626741 | TUSC2    | protein_coding |
| 0,9341044 | RPL24    | protein_coding |
| 0,6613295 | FXR1     | protein_coding |
| 0,1852138 | CBLB     | protein_coding |
| 0,6184746 | BBX      | protein_coding |
| 0,5117223 | IFT57    | protein_coding |
| 0,90504   | GNB4     | protein_coding |
| 0,9361547 | GBE1     | protein_coding |
| 0,8062191 | UMPS     | protein_coding |
| 0,7506449 | NCBP2    | protein_coding |
| 0,8930787 | SNX4     | protein_coding |
| 0,8247964 | FRMD4B   | protein_coding |
| 0,9233889 | SLC41A3  | protein_coding |
| 0,7740102 | PLXNA1   | protein_coding |
| 0,9721598 | ATP6V1A  | protein_coding |
| 0,7088772 | KLHL18   | protein_coding |
| 0,9242864 | SCAP     | protein_coding |
| 0,5265966 | MRPL3    | protein_coding |
| 0,3049645 | PLSCR4   | protein_coding |
| 0,9771336 | HEMK1    | protein_coding |
| 0,5786535 | MAPKAPK3 | protein_coding |
| 0,6461001 | ACVR2B   | protein_coding |
| 0,8213028 | WDR48    | protein_coding |
| 0,9839612 | COMMD2   | protein_coding |
| 0,933129  | GORASP1  | protein_coding |
| 0,5268669 | ABCC5    | protein_coding |
| 0,3942661 | ABHD14B  | protein_coding |
| 0,6602321 | EIF1B    | protein_coding |
| 0,601474  | ARHGEF26 | protein_coding |
| 0,9997039 | KLHL24   | protein_coding |
| 0,7894641 | DNAH1    | protein_coding |
| 0,8091803 | SSR3     | protein_coding |
| 0,284683  | ZBTB47   | protein_coding |
| 0,8285832 | TNNC1    | protein_coding |
| 0,4894579 | NKTR     | protein_coding |
| 0,8946561 | FOXP1    | protein_coding |
| 0,9064657 | EIF4G1   | protein_coding |
| 0,8062191 | SPCS1    | protein_coding |
| 0,4608748 | NEK4     | protein_coding |
| 0,8578793 | SLC4A3   | protein_coding |
| 0,943695  | INO80D   | protein_coding |
| 0,7511084 | EEF1B2   | protein_coding |
| 0,7321942 | ADAM23   | protein_coding |
| 0,9118275 | MOB1A    | protein_coding |
| 0,7382254 | KANSL3   | protein_coding |
| 0,8992483 | LMAN2L   | protein_coding |
| 0,3797364 | TTL      | protein_coding |

|           |         |                |
|-----------|---------|----------------|
| 0,9370061 | PIKFYVE | protein_coding |
| 0,8590905 | FAHD2A  | protein_coding |
| 0,6128477 | NCL     | protein_coding |
| 0,7307715 | ACTR1B  | protein_coding |
| 0,5847346 | SLC35F5 | protein_coding |
| 0,9925374 | ACTR3   | protein_coding |
| 0,8474324 | EPB41L5 | protein_coding |
| 0,769458  | SF3B6   | protein_coding |
| 0,1703144 | DNAJC27 | protein_coding |
| 0,7921707 | STAM2   | protein_coding |
| 0,7968733 | GPD2    | protein_coding |
| 0,8345589 | ACVR1   | protein_coding |
| 0,7085673 | TANC1   | protein_coding |
| 0,9481776 | MPV17   | protein_coding |
| 0,9185201 | GTF3C2  | protein_coding |
| 0,5140003 | EIF2B4  | protein_coding |
| 0,8062191 | NRBP1   | protein_coding |
| 0,3451145 | PSMD14  | protein_coding |
| 0,5765517 | SNX17   | protein_coding |
| 0,9998478 | ASB3    | protein_coding |
| 0,6220194 | PPM1G   | protein_coding |
| 0,2318378 | PDE1A   | protein_coding |
| 0,5511615 | IFIH1   | protein_coding |
| 0,8721281 | RPS15   | protein_coding |
| 0,9125449 | GCA     | protein_coding |
| 0,7972313 | MOGS    | protein_coding |
| 0,9194018 | CLIP4   | protein_coding |
| 0,5267449 | SPTBN1  | protein_coding |
| 0,7219051 | AUP1    | protein_coding |
| 0,271425  | RTN4    | protein_coding |
| 0,8550924 | CCDC88A | protein_coding |
| 0,8992483 | MRPL19  | protein_coding |
| 0,8067508 | LANCL1  | protein_coding |
| 0,54642   | WDR75   | protein_coding |
| 0,1131434 | EFEMP1  | protein_coding |
| 0,8946561 | FANCL   | protein_coding |
| 0,1124027 | FN1     | protein_coding |
| 0,2984194 | STAT1   | protein_coding |
| 0,4498511 | GLS     | protein_coding |
| 0,997931  | PAPOLG  | protein_coding |
| 0,8823913 | UNC50   | protein_coding |
| 0,4032255 | IGFBP2  | protein_coding |
| 0,4670954 | ELMOD3  | protein_coding |
| 0,8846329 | IGFBP5  | protein_coding |
| 0,9074092 | USP34   | protein_coding |
| 0,8875885 | CCT4    | protein_coding |
| 0,887319  | GGCX    | protein_coding |
| 0,993752  | EHBP1   | protein_coding |
| 0,6818653 | TXNDC9  | protein_coding |
| 0,8221205 | COQ10B  | protein_coding |
| 0,7952422 | SF3B1   | protein_coding |
| 0,9977992 | ST3GAL5 | protein_coding |
| 0,8255851 | CHST10  | protein_coding |
| 0,645515  | PDCL3   | protein_coding |
| 0,4011774 | MOB4    | protein_coding |
| 0,3797364 | HSPE1   | protein_coding |
| 0,9438763 | KDM3A   | protein_coding |
| 0,995098  | CHMP3   | protein_coding |
| 0,3268775 | SMYD1   | protein_coding |

|           |          |                |
|-----------|----------|----------------|
| 0,6383874 | IL1R1    | protein_coding |
| 0,2347224 | FHL2     | protein_coding |
| 0,9406097 | MLPH     | protein_coding |
| 0,9374881 | CNPPD1   | protein_coding |
| 0,8593223 | UXS1     | protein_coding |
| 0,7025012 | HDLBP    | protein_coding |
| 0,9290744 | PPP1R7   | protein_coding |
| 0,902171  | STK25    | protein_coding |
| 0,176447  | ID2      | protein_coding |
| 0,9628671 | TAF1B    | protein_coding |
| 0,1773766 | ODC1     | protein_coding |
| 0,9884769 | BIRC6    | protein_coding |
| 0,738122  | NOL10    | protein_coding |
| 0,4070535 | PLEKHB2  | protein_coding |
| 0,8568617 | GORASP2  | protein_coding |
| 0,5397488 | STRN     | protein_coding |
| 0,8555218 | CEBPZ    | protein_coding |
| 0,7645994 | PRKD3    | protein_coding |
| 0,7569416 | DCAF17   | protein_coding |
| 0,997931  | RAB3GAP1 | protein_coding |
| 0,4311333 | SLC25A12 | protein_coding |
| 0,736331  | DARS     | protein_coding |
| 0,7296863 | SRSF7    | protein_coding |
| 0,5193296 | PLCL1    | protein_coding |
| 0,7403796 | SOS1     | protein_coding |
| 0,8796725 | WIPF1    | protein_coding |
| 0,8955637 | ORC2     | protein_coding |
| 0,621558  | COX7A2L  | protein_coding |
| 0,623981  | PNO1     | protein_coding |
| 0,5347705 | ORC4     | protein_coding |
| 0,4498511 | PLEK     | protein_coding |
| 0,855954  | RND3     | protein_coding |
| 0,997931  | ATF2     | protein_coding |
| 0,9082846 | THADA    | protein_coding |
| 0,8874269 | AAK1     | protein_coding |
| 0,7912354 | TRAK2    | protein_coding |
| 0,8318664 | TIA1     | protein_coding |
| 0,9296784 | PCYOX1   | protein_coding |
| 0,7954765 | EPAS1    | protein_coding |
| 0,5558351 | SUMO1    | protein_coding |
| 0,3881918 | NFE2L2   | protein_coding |
| 0,9914435 | MSH6     | protein_coding |
| 0,6269745 | PLEKHA3  | protein_coding |
| 0,9533508 | SPR      | protein_coding |
| 0,998169  | EPHA4    | protein_coding |
| 0,5140003 | PARD3B   | protein_coding |
| 0,2568349 | FARSB    | protein_coding |
| 0,6633625 | ALMS1    | protein_coding |
| 0,8481719 | BCL9     | protein_coding |
| 0,2231549 | PRRX1    | protein_coding |
| 0,9112805 | DHCR24   | protein_coding |
| 0,8095229 | DNAJC16  | protein_coding |
| 0,7309156 | MARK1    | protein_coding |
| 0,191133  | CACYBP   | protein_coding |
| 0,8373546 | SCP2     | protein_coding |
| 0,0895372 | RALGPS2  | protein_coding |
| 0,5558351 | ANGPTL1  | protein_coding |
| 0,5017354 | CEP104   | protein_coding |
| 0,955797  | FAM20B   | protein_coding |

|           |          |                |
|-----------|----------|----------------|
| 0,673546  | TCEANC2  | protein_coding |
| 0,4344504 | TMEM59   | protein_coding |
| 0,692146  | LRRC42   | protein_coding |
| 0,1738303 | MRPL37   | protein_coding |
| 0,2182656 | ICMT     | protein_coding |
| 0,8229361 | RPL22    | protein_coding |
| 0,505053  | QSOX1    | protein_coding |
| 0,824287  | STXBP3   | protein_coding |
| 0,7318327 | ERRFI1   | protein_coding |
| 0,435547  | PARK7    | protein_coding |
| 0,630319  | SRSF4    | protein_coding |
| 0,7154026 | MECR     | protein_coding |
| 0,5140003 | KCNC4    | protein_coding |
| 0,8721867 | EDEM3    | protein_coding |
| 0,6378198 | WDR77    | protein_coding |
| 0,252949  | ATP5PB   | protein_coding |
| 0,5245497 | RAP1A    | protein_coding |
| 0,993752  | HDAC1    | protein_coding |
| 0,9628671 | CAPZA1   | protein_coding |
| 0,8373584 | S100BBP  | protein_coding |
| 0,5647201 | RNF19B   | protein_coding |
| 0,7062909 | SCAMP3   | protein_coding |
| 0,6285359 | ASH1L    | protein_coding |
| 0,855954  | SFPQ     | protein_coding |
| 0,9603194 | RHOU     | protein_coding |
| 0,7611529 | GON4L    | protein_coding |
| 0,6244656 | ARHGEF2  | protein_coding |
| 0,8117718 | MEF2D    | protein_coding |
| 0,927176  | DOCK7    | protein_coding |
| 0,83716   | C1orf21  | protein_coding |
| 0,7639726 | SWT1     | protein_coding |
| 0,7984578 | DNAJC6   | protein_coding |
| 0,1773741 | LEPR     | protein_coding |
| 0,8721867 | IVNS1ABP | protein_coding |
| 0,997931  | KIAA2013 | protein_coding |
| 0,7677769 | MFN2     | protein_coding |
| 0,9946475 | SMG7     | protein_coding |
| 0,7118106 | NCF2     | protein_coding |
| 0,3792977 | SLC35D1  | protein_coding |
| 0,2223198 | GADD45A  | protein_coding |
| 0,8647372 | WLS      | protein_coding |
| 0,9998538 | PRDM2    | protein_coding |
| 0,5139593 | RGS2     | protein_coding |
| 0,8992483 | RO60     | protein_coding |
| 0,3803906 | UCHL5    | protein_coding |
| 0,5890453 | BCAS2    | protein_coding |
| 0,7820981 | SRSF11   | protein_coding |
| 0,54642   | OLFML3   | protein_coding |
| 0,9603194 | PLEKHM2  | protein_coding |
| 0,4971845 | CRYZ     | protein_coding |
| 0,6438613 | PHTF1    | protein_coding |
| 0,6137496 | CD58     | protein_coding |
| 0,808509  | TTF2     | protein_coding |
| 0,290302  | TMEM9    | protein_coding |
| 0,673546  | MAP7D1   | protein_coding |
| 0,9678404 | WARS2    | protein_coding |
| 0,1052063 | MRPS15   | protein_coding |
| 0,7987982 | EXOC8    | protein_coding |
| 0,3850967 | GNPAT    | protein_coding |



|           |          |                |
|-----------|----------|----------------|
| 0,5776471 | TSNAX    | protein_coding |
| 0,8851892 | RRAGC    | protein_coding |
| 0,1131434 | NID1     | protein_coding |
| 0,5402971 | LGALS8   | protein_coding |
| 0,7641298 | MTR      | protein_coding |
| 0,7462938 | SIPA1L2  | protein_coding |
| 0,9729242 | RLF      | protein_coding |
| 0,6027003 | AKT3     | protein_coding |
| 0,2026798 | ETV3     | protein_coding |
| 0,6463814 | ACADM    | protein_coding |
| 0,654521  | ADGRL2   | protein_coding |
| 0,1431468 | SDHB     | protein_coding |
| 0,5337323 | RPF1     | protein_coding |
| 0,445647  | KDM5B    | protein_coding |
| 0,195587  | UAP1     | protein_coding |
| 0,9792506 | CTBS     | protein_coding |
| 0,9298036 | KLHL12   | protein_coding |
| 0,9540553 | SSX2IP   | protein_coding |
| 0,7572071 | ZNHIT6   | protein_coding |
| 0,9358487 | RBBP5    | protein_coding |
| 0,3371364 | GBP3     | protein_coding |
| 0,6925346 | GBP1     | protein_coding |
| 0,3881918 | GPR89A   | protein_coding |
| 0,829234  | CDK18    | protein_coding |
| 0,8229361 | RAB29    | protein_coding |
| 0,7237365 | ECE1     | protein_coding |
| 0,7558125 | HMGCL    | protein_coding |
| 0,1856054 | ID3      | protein_coding |
| 0,8163405 | CD46     | protein_coding |
| 0,7984312 | PRPF3    | protein_coding |
| 0,5296182 | APH1A    | protein_coding |
| 0,427478  | SLC2A1   | protein_coding |
| 0,7291201 | EBNA1BP2 | protein_coding |
| 0,6818653 | IPO13    | protein_coding |
| 0,8682799 | ATP6V0B  | protein_coding |
| 0,9984673 | B4GALT2  | protein_coding |
| 0,9975676 | ERI3     | protein_coding |
| 0,9303646 | AKR1A1   | protein_coding |
| 0,0938658 | PRDX1    | protein_coding |
| 0,5537742 | PIK3R3   | protein_coding |
| 0,7313486 | BLZF1    | protein_coding |
| 0,6468834 | SLC19A2  | protein_coding |
| 0,7611529 | NSUN4    | protein_coding |
| 0,7909474 | TMED5    | protein_coding |
| 0,7972313 | DR1      | protein_coding |
| 0,933129  | CNN3     | protein_coding |
| 0,8622295 | PRRC2C   | protein_coding |
| 0,284683  | F3       | protein_coding |
| 0,5879554 | ABCD3    | protein_coding |
| 0,9496064 | VAMP4    | protein_coding |
| 0,749866  | DPH5     | protein_coding |
| 0,2318378 | PTBP2    | protein_coding |
| 0,1284788 | PRDX6    | protein_coding |
| 0,9953531 | DARS2    | protein_coding |
| 0,4246801 | IRF6     | protein_coding |
| 0,5656126 | UTP25    | protein_coding |
| 0,9541981 | SYF2     | protein_coding |
| 0,3194617 | RSRP1    | protein_coding |
| 0,9778442 | SLC35A3  | protein_coding |

|           |          |                |
|-----------|----------|----------------|
| 0,8992483 | RCOR3    | protein_coding |
| 0,3194617 | STMN1    | protein_coding |
| 0,6543081 | MTFR1L   | protein_coding |
| 0,400727  | MAN1C1   | protein_coding |
| 0,7740102 | DHDDS    | protein_coding |
| 0,9464798 | NENF     | protein_coding |
| 0,6156953 | NSL1     | protein_coding |
| 0,8858562 | PROX1    | protein_coding |
| 0,9910925 | ARID1A   | protein_coding |
| 0,6583765 | RPA2     | protein_coding |
| 0,993752  | PPP1R8   | protein_coding |
| 0,770735  | STX12    | protein_coding |
| 0,1326966 | MARC2    | protein_coding |
| 0,7956173 | OSBPL9   | protein_coding |
| 0,9630144 | ESYT2    | protein_coding |
| 0,6870873 | MESD     | protein_coding |
| 0,9781971 | RCN2     | protein_coding |
| 0,9233889 | CTSD     | protein_coding |
| 0,8447416 | STAG1    | protein_coding |
| 0,9840915 | STK11    | protein_coding |
| 0,4848227 | KMT2A    | protein_coding |
| 0,8155634 | IFT46    | protein_coding |
| 0,9925374 | RPS25    | protein_coding |
| 0,8578622 | TNNT2    | protein_coding |
| 0,8812706 | DDX59    | protein_coding |
| 0,9002008 | CAMSAP2  | protein_coding |
| 0,878778  | ATF6     | protein_coding |
| 0,4954628 | FASTKD2  | protein_coding |
| 0,3803906 | NRP2     | protein_coding |
| 0,9998478 | CREB1    | protein_coding |
| 0,9450135 | KLF7     | protein_coding |
| 0,1738303 | B4GALT6  | protein_coding |
| 0,8318664 | SPCS2    | protein_coding |
| 0,891947  | FILIP1   | protein_coding |
| 0,6870873 | CASP8AP2 | protein_coding |
| 0,3503253 | HMGN3    | protein_coding |
| 0,8481719 | ANKRD13C | protein_coding |
| 0,3943278 | SGIP1    | protein_coding |
| 0,8992483 | PHF3     | protein_coding |
| 0,6564675 | PLAGL1   | protein_coding |
| 0,9564455 | FBXO30   | protein_coding |
| 0,284683  | TNFAIP3  | protein_coding |
| 0,9296784 | AKAP7    | protein_coding |
| 0,5558351 | SGK1     | protein_coding |
| 0,895571  | RNF146   | protein_coding |
| 0,3034549 | CCN2     | protein_coding |
| 0,7558125 | FBXL5    | protein_coding |
| 0,8373584 | MED28    | protein_coding |
| 0,9428271 | SLC16A7  | protein_coding |
| 0,8841902 | ZNF430   | protein_coding |
| 0,8847411 | MYL12B   | protein_coding |
| 0,8131645 | FOXO3    | protein_coding |
| 0,9919804 | ARMC2    | protein_coding |
| 0,5537742 | RPN2     | protein_coding |
| 0,7126808 | CASQ2    | protein_coding |
| 0,4498511 | PKD2     | protein_coding |
| 0,3697716 | SPP1     | protein_coding |
| 0,762448  | CCNI     | protein_coding |
| 0,8885864 | RARRES1  | protein_coding |

|           |          |                |
|-----------|----------|----------------|
| 0,8500846 | MFSD1    | protein_coding |
| 0,997931  | RAB3GAP2 | protein_coding |
| 0,5456715 | PPL      | protein_coding |
| 0,9962215 | UBN1     | protein_coding |
| 0,9946475 | KLF12    | protein_coding |
| 0,6543081 | PCDH17   | protein_coding |
| 0,7506449 | HS1BP3   | protein_coding |
| 0,9995727 | LDAH     | protein_coding |
| 0,5647201 | WDR35    | protein_coding |
| 0,6132228 | CCND2    | protein_coding |
| 0,7836389 | ELL2     | protein_coding |
| 0,5537742 | CYP20A1  | protein_coding |
| 0,1674733 | NDUFB3   | protein_coding |
| 0,6244656 | GTF3C3   | protein_coding |
| 0,7596217 | UBE2B    | protein_coding |
| 0,7606144 | KLF9     | protein_coding |
| 0,8721867 | ITGB1BP1 | protein_coding |
| 0,7572724 | CPSF3    | protein_coding |
| 0,9715104 | SENP5    | protein_coding |
| 0,4806087 | CCDC92   | protein_coding |
| 0,3358601 | C1orf198 | protein_coding |
| 0,9840915 | HEATR1   | protein_coding |
| 0,7956173 | PTBP3    | protein_coding |
| 0,8888699 | RAD23B   | protein_coding |
| 0,5265966 | FKBP15   | protein_coding |
| 0,6206631 | CTNNAL1  | protein_coding |
| 0,8870441 | ABITRAM  | protein_coding |
| 0,9528744 | SET      | protein_coding |
| 0,7062909 | PTPA     | protein_coding |
| 0,8775933 | GLE1     | protein_coding |
| 0,6438613 | RAB14    | protein_coding |
| 0,5011485 | CNTRL    | protein_coding |
| 0,9481776 | TRIM32   | protein_coding |
| 0,9709611 | FBXW2    | protein_coding |
| 0,861259  | PHF19    | protein_coding |
| 0,4886289 | NEK6     | protein_coding |
| 0,8885783 | PPP6C    | protein_coding |
| 0,2687129 | NDUFA8   | protein_coding |
| 0,6613295 | RBM18    | protein_coding |
| 0,9481776 | HSDL2    | protein_coding |
| 0,615864  | MAPKAP1  | protein_coding |
| 0,7114949 | NR4A3    | protein_coding |
| 0,8099847 | INVS     | protein_coding |
| 0,671498  | DENND1A  | protein_coding |
| 0,8682129 | ALG2     | protein_coding |
| 0,7558125 | KDSR     | protein_coding |
| 0,6673583 | VPS4B    | protein_coding |
| 0,7803562 | YLPM1    | protein_coding |
| 0,9578517 | FCF1     | protein_coding |
| 0,7385573 | NEK9     | protein_coding |
| 0,5140003 | IFT43    | protein_coding |
| 0,8318664 | NPC2     | protein_coding |
| 0,1881669 | DNAL1    | protein_coding |
| 0,933129  | IRF2BPL  | protein_coding |
| 0,7980625 | ACOT2    | protein_coding |
| 0,1284788 | LTBP2    | protein_coding |
| 0,6795819 | AREL1    | protein_coding |
| 0,3776155 | MLH3     | protein_coding |
| 0,9953531 | TTLL5    | protein_coding |

|           |         |                |
|-----------|---------|----------------|
| 0,9411751 | ABCD4   | protein_coding |
| 0,6048439 | DLST    | protein_coding |
| 0,6563172 | TGFB3   | protein_coding |
| 0,2150608 | SLIRP   | protein_coding |
| 0,8522628 | RBM25   | protein_coding |
| 0,3801685 | ALDH6A1 | protein_coding |
| 0,5445815 | EIF2B2  | protein_coding |
| 0,7321942 | NRDE2   | protein_coding |
| 0,5117223 | COQ6    | protein_coding |
| 0,7607016 | RHOQ    | protein_coding |
| 0,9700303 | SUPT7L  | protein_coding |
| 0,5180247 | DNMT3A  | protein_coding |
| 0,9376695 | TMEM214 | protein_coding |
| 0,9562513 | ATAD2B  | protein_coding |
| 0,855954  | ATL2    | protein_coding |
| 0,8062191 | YPEL5   | protein_coding |
| 0,855954  | FAM98A  | protein_coding |
| 0,9312186 | YIPF4   | protein_coding |
| 0,8373584 | AFTPH   | protein_coding |
| 0,5879554 | LGALS1  | protein_coding |
| 0,445647  | CNRIP1  | protein_coding |
| 0,4954628 | CRIP1   | protein_coding |
| 0,4096736 | SLC17A5 | protein_coding |
| 0,6776989 | OGFRL1  | protein_coding |
| 0,7596217 | SLF2    | protein_coding |
| 0,5474737 | IDE     | protein_coding |
| 0,6425583 | IFIT3   | protein_coding |
| 0,310557  | IFIT2   | protein_coding |
| 0,983457  | GPAM    | protein_coding |
| 0,2443691 | CUTC    | protein_coding |
| 0,3178501 | PPP1R3C | protein_coding |
| 0,9792506 | MXI1    | protein_coding |
| 0,997931  | SMNDC1  | protein_coding |
| 0,3049645 | TCTN3   | protein_coding |
| 0,6491869 | DENND10 | protein_coding |
| 0,9484395 | WDR11   | protein_coding |
| 0,4657211 | ARMH3   | protein_coding |
| 0,091723  | KCNIP2  | protein_coding |
| 0,4070535 | GOT1    | protein_coding |
| 0,9781148 | GNA13   | protein_coding |
| 0,5943942 | KANSL1  | protein_coding |
| 0,1740802 | DUSP1   | protein_coding |
| 0,9767278 | PANK3   | protein_coding |
| 0,0895372 | TEK     | protein_coding |
| 0,7996567 | CAAP1   | protein_coding |
| 0,8881504 | CD274   | protein_coding |
| 0,5537742 | NUP43   | protein_coding |
| 0,2737133 | PCMT1   | protein_coding |
| 0,2984194 | PLEKHG1 | protein_coding |
| 0,4732706 | MYCT1   | protein_coding |
| 0,505053  | CYSTM1  | protein_coding |
| 0,9900815 | WDR55   | protein_coding |
| 0,6988495 | MRPS14  | protein_coding |
| 0,9587213 | GORAB   | protein_coding |
| 0,3089259 | TCP1    | protein_coding |
| 0,8221205 | SNX19   | protein_coding |
| 0,4602818 | KCNJ5   | protein_coding |
| 0,6023346 | PDZD11  | protein_coding |
| 0,9465232 | SLC10A7 | protein_coding |

|           |           |                |
|-----------|-----------|----------------|
| 0,855954  | NUDCD1    | protein_coding |
| 0,4521055 | ENY2      | protein_coding |
| 0,3829653 | KIAA1217  | protein_coding |
| 0,1352102 | PLXDC2    | protein_coding |
| 0,7984578 | EPC1      | protein_coding |
| 0,721162  | TAF12     | protein_coding |
| 0,6304019 | MTRF1     | protein_coding |
| 0,2440137 | DNAJC15   | protein_coding |
| 0,9954421 | PROSER1   | protein_coding |
| 0,8648632 | UFM1      | protein_coding |
| 0,2407669 | WBP4      | protein_coding |
| 0,8189129 | ELF1      | protein_coding |
| 0,195587  | SMAD9     | protein_coding |
| 0,8885864 | HSPH1     | protein_coding |
| 0,6128477 | KBTBD7    | protein_coding |
| 0,9002008 | ALG5      | protein_coding |
| 0,5180247 | EXOSC8    | protein_coding |
| 0,7940001 | ETF1      | protein_coding |
| 0,1916186 | TGFBI     | protein_coding |
| 0,796666  | FAM53C    | protein_coding |
| 0,8796725 | SIL1      | protein_coding |
| 0,8930787 | PAIP2     | protein_coding |
| 0,9528194 | MYOT      | protein_coding |
| 0,3667541 | KDM3B     | protein_coding |
| 0,5029234 | EGR1      | protein_coding |
| 0,4859932 | SERP1     | protein_coding |
| 0,9761152 | ZFP30     | protein_coding |
| 0,8229361 | NR2C1     | protein_coding |
| 0,9761152 | UTP20     | protein_coding |
| 0,7352523 | TMPO      | protein_coding |
| 0,8545769 | ARL1      | protein_coding |
| 0,2337466 | GLT8D2    | protein_coding |
| 0,7924243 | MTERF2    | protein_coding |
| 0,9666028 | SOCS2     | protein_coding |
| 0,9735049 | NFYB      | protein_coding |
| 0,3447404 | WASHC3    | protein_coding |
| 0,2834613 | APAF1     | protein_coding |
| 0,8430111 | CLU       | protein_coding |
| 0,624851  | TNFRSF10B | protein_coding |
| 0,7817948 | PTK2B     | protein_coding |
| 0,6173428 | PPP3CC    | protein_coding |
| 0,8489317 | EPHX2     | protein_coding |
| 0,809839  | RNF170    | protein_coding |
| 0,3078991 | NPPB      | protein_coding |
| 0,9084344 | TARDBP    | protein_coding |
| 0,9150264 | ZNF706    | protein_coding |
| 0,5583085 | LYPLA1    | protein_coding |
| 0,1642927 | COPS5     | protein_coding |
| 0,9680053 | RDH10     | protein_coding |
| 0,8575378 | AKAP1     | protein_coding |
| 0,8373584 | COIL      | protein_coding |
| 0,9538485 | TRIM25    | protein_coding |
| 0,9226832 | SCPEP1    | protein_coding |
| 0,8870441 | SPOP      | protein_coding |
| 0,2281984 | SLC35B1   | protein_coding |
| 0,5985056 | TMEM131L  | protein_coding |
| 0,6425583 | TENT4B    | protein_coding |
| 0,5442603 | CEP89     | protein_coding |
| 0,8578793 | ECHDC2    | protein_coding |

|           |          |                |
|-----------|----------|----------------|
| 0,7237365 | PLBD1    | protein_coding |
| 0,749866  | PYROXD1  | protein_coding |
| 0,9142106 | KCNJ8    | protein_coding |
| 0,4684539 | PSPC1    | protein_coding |
| 0,9089634 | ZNF549   | protein_coding |
| 0,5024248 | ZSCAN18  | protein_coding |
| 0,9312186 | ZNF211   | protein_coding |
| 0,520749  | PDZRN3   | protein_coding |
| 0,9840915 | RNF2     | protein_coding |
| 0,9998478 | TRMT1L   | protein_coding |
| 0,9277595 | SEC22A   | protein_coding |
| 0,7645994 | POPDC2   | protein_coding |
| 0,5485366 | B4GALT4  | protein_coding |
| 0,8901085 | NAA50    | protein_coding |
| 0,9484395 | DESI2    | protein_coding |
| 0,7670701 | CRY2     | protein_coding |
| 0,5953122 | CAT      | protein_coding |
| 0,8114908 | ZMYM2    | protein_coding |
| 0,6254273 | GJA3     | protein_coding |
| 0,9618453 | TBC1D15  | protein_coding |
| 0,8575378 | ZCCHC17  | protein_coding |
| 0,7168957 | FABP3    | protein_coding |
| 0,7301898 | KHDRBS1  | protein_coding |
| 0,855954  | POLR3GL  | protein_coding |
| 0,9007353 | TNFSF10  | protein_coding |
| 0,6591549 | ZNF639   | protein_coding |
| 0,9894339 | PIK3CA   | protein_coding |
| 0,9854182 | PDS5A    | protein_coding |
| 0,5752656 | LIAS     | protein_coding |
| 0,3004311 | CPXM2    | protein_coding |
| 0,5557127 | LRIF1    | protein_coding |
| 0,8786805 | CLCC1    | protein_coding |
| 0,0953127 | GPSM2    | protein_coding |
| 0,9840915 | GTDC1    | protein_coding |
| 0,9484395 | ZRANB3   | protein_coding |
| 0,8367243 | ACVR2A   | protein_coding |
| 0,8131645 | POLK     | protein_coding |
| 0,9840915 | RPL21    | protein_coding |
| 0,0197802 | MTIF3    | protein_coding |
| 0,0132445 | GTF3A    | protein_coding |
| 0,855954  | UBL3     | protein_coding |
| 0,9366634 | FYTTD1   | protein_coding |
| 0,838064  | MTERF4   | protein_coding |
| 0,3339605 | OCRL     | protein_coding |
| 0,0197802 | FMOD     | protein_coding |
| 0,9994264 | KIAA1191 | protein_coding |
| 0,1800952 | COPA     | protein_coding |
| 0,8212084 | RBBP6    | protein_coding |
| 0,8373546 | ZC3H7A   | protein_coding |
| 0,8871625 | SERAC1   | protein_coding |
| 0,7467854 | ANXA11   | protein_coding |
| 0,7774855 | LDB3     | protein_coding |
| 0,5879554 | SHLD2    | protein_coding |
| 0,2945575 | PRXL2A   | protein_coding |
| 0,7956173 | RPL5     | protein_coding |
| 0,7528871 | ODF2L    | protein_coding |
| 0,1131434 | PTGFR    | protein_coding |
| 0,8930787 | TRMT13   | protein_coding |
| 0,5029234 | LRRC39   | protein_coding |

|           |           |                |
|-----------|-----------|----------------|
| 0,6867028 | ZNF644    | protein_coding |
| 0,7049962 | CCDC18    | protein_coding |
| 0,9439974 | RPAP2     | protein_coding |
| 0,4161706 | BBS9      | protein_coding |
| 0,864196  | PMS2      | protein_coding |
| 0,9998478 | SEPTIN7   | protein_coding |
| 0,4175635 | KLHL7     | protein_coding |
| 0,3792977 | HERPUD2   | protein_coding |
| 0,7238799 | CBX3      | protein_coding |
| 0,3748795 | HNRNPA2B1 | protein_coding |
| 0,8863508 | FAM126A   | protein_coding |
| 0,8117718 | FKBP9     | protein_coding |
| 0,8373584 | NT5C3A    | protein_coding |
| 0,8258095 | ARL4A     | protein_coding |
| 0,692146  | CCZ1      | protein_coding |
| 0,7385573 | RAMP3     | protein_coding |
| 0,8545769 | SMU1      | protein_coding |
| 0,9359033 | SLC25A51  | protein_coding |
| 0,9296784 | CLTA      | protein_coding |
| 0,6337897 | RECK      | protein_coding |
| 0,9781971 | ACO1      | protein_coding |
| 0,9067454 | DCAF10    | protein_coding |
| 0,8189129 | TRIM24    | protein_coding |
| 0,7065438 | CALD1     | protein_coding |
| 0,1336905 | PLAU      | protein_coding |
| 0,7154026 | SRGN      | protein_coding |
| 0,6604792 | CHST3     | protein_coding |
| 0,5847346 | BICC1     | protein_coding |
| 0,2948143 | CISD1     | protein_coding |
| 0,8238032 | ECD       | protein_coding |
| 0,7135335 | P4HA1     | protein_coding |
| 0,5709725 | SLC25A16  | protein_coding |
| 0,9998538 | VPS26A    | protein_coding |
| 0,8641364 | RBM19     | protein_coding |
| 0,8992483 | IFT81     | protein_coding |
| 0,9952606 | MED13L    | protein_coding |
| 0,8578622 | CDKN2C    | protein_coding |
| 0,9476644 | RNF11     | protein_coding |
| 0,9312186 | RASSF8    | protein_coding |
| 0,0185612 | BHLHE41   | protein_coding |
| 0,9296784 | SSPN      | protein_coding |
| 0,8868311 | ITPR2     | protein_coding |
| 0,9825766 | CCDC91    | protein_coding |
| 0,6852472 | NECAB1    | protein_coding |
| 0,4311333 | WWP1      | protein_coding |
| 0,7118106 | ACOT9     | protein_coding |
| 0,6491869 | PRDX4     | protein_coding |
| 0,9174724 | PKN1      | protein_coding |
| 0,8578793 | TRIR      | protein_coding |
| 0,9781971 | ADGRE5    | protein_coding |
| 0,9803555 | GIPC1     | protein_coding |
| 0,6776989 | SPRYD7    | protein_coding |
| 0,0943087 | ATP7B     | protein_coding |
| 0,3883821 | ZC3H13    | protein_coding |
| 0,8578622 | NLN       | protein_coding |
| 0,8311093 | OPTN      | protein_coding |
| 0,4775021 | ITIH5     | protein_coding |
| 0,6084958 | ATF1      | protein_coding |
| 0,7912354 | NCKAP1L   | protein_coding |

|           |          |                |
|-----------|----------|----------------|
| 0,8565534 | PFDN5    | protein_coding |
| 0,6644356 | SPATS2   | protein_coding |
| 0,3943278 | NR4A1    | protein_coding |
| 0,9465232 | LRP1     | protein_coding |
| 0,8259599 | TUBA1B   | protein_coding |
| 0,8209243 | ATPAF1   | protein_coding |
| 0,3078991 | AMD1     | protein_coding |
| 0,4562339 | NDUFAF4  | protein_coding |
| 0,7444016 | USP45    | protein_coding |
| 0,0736295 | PLP1     | protein_coding |
| 0,8682799 | MORF4L2  | protein_coding |
| 0,8259599 | RAB9B    | protein_coding |
| 0,9614756 | FAM199X  | protein_coding |
| 0,9953531 | RAB9A    | protein_coding |
| 0,690748  | METTL8   | protein_coding |
| 0,685088  | TTC21B   | protein_coding |
| 0,9410289 | BAZ2B    | protein_coding |
| 0,9080545 | LPGAT1   | protein_coding |
| 0,8219707 | G0S2     | protein_coding |
| 0,764019  | RAP2C    | protein_coding |
| 0,6961817 | EXOSC9   | protein_coding |
| 0,8218459 | PLA2G12A | protein_coding |
| 0,8868311 | PFKFB2   | protein_coding |
| 0,9944531 | AGO2     | protein_coding |
| 0,3218826 | MXD4     | protein_coding |
| 0,9074092 | ACSL3    | protein_coding |
| 0,3316892 | CHPF     | protein_coding |
| 0,8847411 | DNPEP    | protein_coding |
| 0,3697716 | OBSL1    | protein_coding |
| 0,6003589 | SLC12A4  | protein_coding |
| 0,9615223 | FAM210B  | protein_coding |
| 0,5998801 | TTPAL    | protein_coding |
| 0,7638819 | PREX1    | protein_coding |
| 0,3894807 | SDC4     | protein_coding |
| 0,7506449 | NCOA3    | protein_coding |
| 0,9481776 | PIGT     | protein_coding |
| 0,9703483 | NCOA5    | protein_coding |
| 0,9998478 | VAPB     | protein_coding |
| 0,2915153 | ATP5F1E  | protein_coding |
| 0,7467854 | CHD6     | protein_coding |
| 0,5164856 | PLCG1    | protein_coding |
| 0,9792506 | SRSF6    | protein_coding |
| 0,998169  | ARFGEF2  | protein_coding |
| 0,4521055 | ZNFX1    | protein_coding |
| 0,5647201 | CSE1L    | protein_coding |
| 0,5994444 | RAB22A   | protein_coding |
| 0,4847278 | PTGIS    | protein_coding |
| 0,6285359 | STAU1    | protein_coding |
| 0,5964345 | STX16    | protein_coding |
| 0,9738194 | PMEPA1   | protein_coding |
| 0,9368504 | RNF114   | protein_coding |
| 0,9804708 | DDX27    | protein_coding |
| 0,59951   | MTRR     | protein_coding |
| 0,6383874 | PEPD     | protein_coding |
| 0,9738194 | VAMP7    | protein_coding |
| 0,7104968 | STAMBP   | protein_coding |
| 0,9792506 | NAGK     | protein_coding |
| 0,7237365 | MCEE     | protein_coding |
| 0,8062191 | PAIP2B   | protein_coding |



|           |           |                |
|-----------|-----------|----------------|
| 0,6564675 | SNRNP27   | protein_coding |
| 0,9528194 | MPHOSPH10 | protein_coding |
| 0,9312186 | ATP8A1    | protein_coding |
| 0,441827  | USP22     | protein_coding |
| 0,8930787 | POF1B     | protein_coding |
| 0,9894339 | HIF3A     | protein_coding |
| 0,9781971 | ZNF45     | protein_coding |
| 0,931978  | USP9X     | protein_coding |
| 0,0015119 | F13A1     | protein_coding |
| 0,6333516 | SIRT5     | protein_coding |
| 0,624851  | MRS2      | protein_coding |
| 0,8603658 | WRNIP1    | protein_coding |
| 0,4344705 | RRP36     | protein_coding |
| 0,2217718 | SNRPC     | protein_coding |
| 0,0730772 | SERPINB6  | protein_coding |
| 0,8854446 | XPO5      | protein_coding |
| 0,3459301 | NQO2      | protein_coding |
| 0,9450135 | OARD1     | protein_coding |
| 0,9465232 | RPS10     | protein_coding |
| 0,6225174 | MOCS1     | protein_coding |
| 0,4237568 | MED20     | protein_coding |
| 0,4761054 | MAD2L1BP  | protein_coding |
| 0,3212727 | APOBEC2   | protein_coding |
| 0,9618453 | KLHDC3    | protein_coding |
| 0,9628671 | MEA1      | protein_coding |
| 0,6212456 | KLHL31    | protein_coding |
| 0,0868691 | COL21A1   | protein_coding |
| 0,95402   | CDKN1A    | protein_coding |
| 0,9602183 | SOX4      | protein_coding |
| 0,4608748 | GLO1      | protein_coding |
| 0,7490465 | CPNE5     | protein_coding |
| 0,9798738 | RREB1     | protein_coding |
| 0,7444016 | SSR1      | protein_coding |
| 0,9962215 | RIOK1     | protein_coding |
| 0,7352523 | NRN1      | protein_coding |
| 0,8086025 | SLC35B3   | protein_coding |
| 0,4638153 | ATXN1     | protein_coding |
| 0,8547943 | NUP153    | protein_coding |
| 0,4724079 | DEK       | protein_coding |
| 0,4601677 | LRRFIP1   | protein_coding |
| 0,5046858 | AHNAK     | protein_coding |
| 0,1712026 | EMC3      | protein_coding |
| 0,7546576 | CNOT1     | protein_coding |
| 0,9007353 | BBS2      | protein_coding |
| 0,645515  | MT2A      | protein_coding |
| 0,6604792 | GOT2      | protein_coding |
| 0,9628671 | RAP2A     | protein_coding |
| 0,9893144 | ABCC4     | protein_coding |
| 0,3881918 | EFNB2     | protein_coding |
| 0,8834615 | TM9SF2    | protein_coding |
| 0,9033043 | IRF1      | protein_coding |
| 0,5180247 | SEPTIN6   | protein_coding |
| 0,1326966 | NDUFA1    | protein_coding |
| 0,8377134 | DMAC2L    | protein_coding |
| 0,9925374 | FAM193A   | protein_coding |
| 0,2841212 | SOX9      | protein_coding |
| 0,2560075 | MRPS7     | protein_coding |
| 0,9450135 | GGA3      | protein_coding |
| 0,6305527 | NUP85     | protein_coding |

|           |          |                |
|-----------|----------|----------------|
| 0,9900815 | MSTO1    | protein_coding |
| 0,4835164 | TTF1     | protein_coding |
| 0,7477503 | GTF3C4   | protein_coding |
| 0,9484395 | PPP1R12C | protein_coding |
| 0,9768456 | INSIG2   | protein_coding |
| 0,9572126 | POLR1B   | protein_coding |
| 0,9039795 | CCDC93   | protein_coding |
| 0,9086664 | SLC25A23 | protein_coding |
| 0,8221205 | GTF2F1   | protein_coding |
| 0,7412353 | THOC2    | protein_coding |
| 0,9356716 | MED1     | protein_coding |
| 0,9533676 | RPL23    | protein_coding |
| 0,9700303 | ATG4C    | protein_coding |
| 0,5558351 | C3       | protein_coding |
| 0,7122873 | TRIP10   | protein_coding |
| 0,5062136 | GPR108   | protein_coding |
| 0,6567534 | OPA3     | protein_coding |
| 0,7740102 | SNRPD2   | protein_coding |
| 0,3989779 | VASP     | protein_coding |
| 0,8908494 | SYMPK    | protein_coding |
| 0,9899185 | GPCPD1   | protein_coding |
| 0,9628671 | PANK2    | protein_coding |
| 0,8695843 | CD93     | protein_coding |
| 0,9410184 | GZF1     | protein_coding |
| 0,989732  | NAPB     | protein_coding |
| 0,9081173 | CENPB    | protein_coding |
| 0,6914529 | PSMF1    | protein_coding |
| 0,7576959 | RBCK1    | protein_coding |
| 0,2690459 | TMX4     | protein_coding |
| 0,8665655 | STK35    | protein_coding |
| 0,9828457 | SNRPB    | protein_coding |
| 0,9485776 | RRBP1    | protein_coding |
| 0,8623038 | ZNF133   | protein_coding |
| 0,1501348 | MKKS     | protein_coding |
| 0,5688668 | DSTN     | protein_coding |
| 0,623981  | SNRPB2   | protein_coding |
| 0,8721281 | MGME1    | protein_coding |
| 0,6653209 | TBC1D20  | protein_coding |
| 0,943695  | HNRNPR   | protein_coding |
| 0,5474737 | ZNF436   | protein_coding |
| 0,8727034 | MAX      | protein_coding |
| 0,3943278 | ID1      | protein_coding |
| 0,997923  | RALY     | protein_coding |
| 0,445647  | EIF2S2   | protein_coding |
| 0,8875885 | ERGIC3   | protein_coding |
| 0,8593223 | ROMO1    | protein_coding |
| 0,4378091 | CEP250   | protein_coding |
| 0,9893144 | KDM5C    | protein_coding |
| 0,3715255 | AMOT     | protein_coding |
| 0,4835164 | PSMB2    | protein_coding |
| 0,9540553 | AGO3     | protein_coding |
| 0,9156816 | UROD     | protein_coding |
| 0,8647372 | HECTD3   | protein_coding |
| 0,9975676 | KLC1     | protein_coding |
| 0,9956922 | TUBGCP3  | protein_coding |
| 0,7095541 | MCF2L    | protein_coding |
| 0,6613295 | PCID2    | protein_coding |
| 0,8206562 | CAPNS1   | protein_coding |
| 0,8688662 | UBA2     | protein_coding |

|           |          |                |
|-----------|----------|----------------|
| 0,1735916 | COX6B1   | protein_coding |
| 0,4593782 | THRA     | protein_coding |
| 0,5925149 | PRDX5    | protein_coding |
| 0,7713242 | PRMT1    | protein_coding |
| 0,8992483 | RRAS     | protein_coding |
| 0,9610275 | SBDS     | protein_coding |
| 0,9771336 | STAT5A   | protein_coding |
| 0,6023346 | BECN1    | protein_coding |
| 0,9594887 | TRAP1    | protein_coding |
| 0,9645423 | NSRP1    | protein_coding |
| 0,7065438 | DNAJC8   | protein_coding |
| 0,1064872 | IFI6     | protein_coding |
| 0,5175488 | EMG1     | protein_coding |
| 0,7165662 | UXT      | protein_coding |
| 0,8269408 | PCNX4    | protein_coding |
| 0,7118106 | ATG14    | protein_coding |
| 0,6088362 | KTN1     | protein_coding |
| 0,8238032 | RHOJ     | protein_coding |
| 0,8941532 | L3HYPDH  | protein_coding |
| 0,1232731 | HSPA2    | protein_coding |
| 0,5895248 | ZBTB1    | protein_coding |
| 0,998169  | TRMT5    | protein_coding |
| 0,9296784 | SGPP1    | protein_coding |
| 0,5416343 | PLEKHG3  | protein_coding |
| 0,6838951 | RHOT1    | protein_coding |
| 0,6316303 | WDR60    | protein_coding |
| 0,09831   | AIF1L    | protein_coding |
| 0,6184079 | FAM78A   | protein_coding |
| 0,9374881 | NUP214   | protein_coding |
| 0,7740102 | MAP2K2   | protein_coding |
| 0,8148845 | HNRNPH2  | protein_coding |
| 0,624851  | ARMCX1   | protein_coding |
| 0,7321942 | CANX     | protein_coding |
| 0,933129  | INTS11   | protein_coding |
| 0,6591549 | ZNF484   | protein_coding |
| 0,0908653 | OMD      | protein_coding |
| 0,9359827 | PPCS     | protein_coding |
| 0,2205761 | COX7C    | protein_coding |
| 0,3867348 | MASP1    | protein_coding |
| 0,9296784 | HELB     | protein_coding |
| 0,8786805 | RAP1B    | protein_coding |
| 0,2506935 | RAB3IP   | protein_coding |
| 0,4835164 | PTPRB    | protein_coding |
| 0,9536474 | DYRK2    | protein_coding |
| 0,8545769 | PIN1     | protein_coding |
| 0,9769756 | EMC1     | protein_coding |
| 0,554525  | PLA2G5   | protein_coding |
| 0,9928407 | UBR4     | protein_coding |
| 0,5269672 | HP1BP3   | protein_coding |
| 0,6988495 | SIN3B    | protein_coding |
| 0,933129  | SLC35E1  | protein_coding |
| 0,8996732 | EPS15L1  | protein_coding |
| 0,4246004 | UQCR11   | protein_coding |
| 0,964785  | MACF1    | protein_coding |
| 0,9781971 | SMARCA4  | protein_coding |
| 0,9998478 | KDM4B    | protein_coding |
| 0,7230802 | METTTL25 | protein_coding |
| 0,7452363 | METTTL16 | protein_coding |
| 0,4321437 | TUBA4A   | protein_coding |

|           |          |                      |
|-----------|----------|----------------------|
| 0,5249547 | AAMP     | protein_coding       |
| 0,6613295 | PNKD     | protein_coding       |
| 0,0222168 | TNFRSF19 | protein_coding       |
| 0,9582115 | RNF6     | protein_coding       |
| 0,9391446 | ECHS1    | protein_coding       |
| 0,8194018 | AKAP9    | protein_coding       |
| 0,3943278 | GNG11    | protein_coding       |
| 0,2644142 | SEM1     | protein_coding       |
| 0,9700303 | HIP1     | protein_coding       |
| 0,9998478 | PTPN12   | protein_coding       |
| 0,9628671 | POR      | protein_coding       |
| 0,4593782 | FGL2     | protein_coding       |
| 0,1067405 | STEAP4   | protein_coding       |
| 0,8117718 | GNAI1    | protein_coding       |
| 0,7467854 | PEX1     | protein_coding       |
| 0,8441592 | MTERF1   | protein_coding       |
| 0,8474324 | SGCE     | protein_coding       |
| 0,9918615 | RBM48    | protein_coding       |
| 0,7114715 | CASD1    | protein_coding       |
| 0,7972313 | ZNF780B  | protein_coding       |
| 0,9997651 | ZFP36    | protein_coding       |
| 0,6093605 | PAICS    | protein_coding       |
| 0,445647  | KDR      | protein_coding       |
| 0,615864  | TUBGCP6  | protein_coding       |
| 0,9551108 | DGCR6L   | protein_coding       |
| 0,9998538 | DGCR8    | protein_coding       |
| 0,8812706 | YWHAH    | protein_coding       |
| 0,4532937 | ATF4     | protein_coding       |
| 0,592905  | APOL3    | protein_coding       |
| 0,3358601 | TPST2    | protein_coding       |
| 0,4761054 | MPST     | protein_coding       |
| 0,5060008 | APOL2    | protein_coding       |
| 0,5754389 | EMC4     | protein_coding       |
| 0,3167153 | SPECC1   | protein_coding       |
| 0,8695843 | DOCK4    | protein_coding       |
| 0,6383874 | POT1     | protein_coding       |
| 0,4628071 | ATP6V1F  | protein_coding       |
| 0,4562339 | LSM8     | protein_coding       |
| 0,5413406 | PODXL    | protein_coding       |
| 0,8240849 | STRIP2   | protein_coding       |
| 0,9379013 | IFT22    | protein_coding       |
| 0,6188889 | MKLN1    | protein_coding       |
| 0,8829558 | DNAJB9   | protein_coding       |
| 0,9108829 | FLNC     | protein_coding       |
| 0,5456715 | CALU     | protein_coding       |
| 0,6238595 | KLHDC10  | protein_coding       |
| 0,2807832 | NDUFA5   | protein_coding       |
| 0,9454316 | MYO1B    | protein_coding       |
| 0,1856054 | MTX2     | protein_coding       |
| 0,6568293 | EIF2S2P4 | processed_pseudogene |
| 0,6613817 | OSGEPL1  | protein_coding       |
| 0,9463928 | ORMDL1   | protein_coding       |
| 0,3358222 | HAT1     | protein_coding       |
| 0,8281575 | HERC2    | protein_coding       |
| 0,9007686 | SNRPN    | protein_coding       |
| 0,9731251 | PSMG2    | protein_coding       |
| 0,5367932 | TWSG1    | protein_coding       |
| 0,8283953 | EIF2AK4  | protein_coding       |
| 0,1232731 | MYO5C    | protein_coding       |

|           |          |                |
|-----------|----------|----------------|
| 0,2945575 | CGNL1    | protein_coding |
| 0,8238032 | TMOD2    | protein_coding |
| 0,8189129 | TTBK2    | protein_coding |
| 0,9368504 | INO80    | protein_coding |
| 0,9358987 | ICE2     | protein_coding |
| 0,0286685 | ALDH1A2  | protein_coding |
| 0,9678404 | MINDY2   | protein_coding |
| 0,7362379 | IVD      | protein_coding |
| 0,9966756 | DUT      | protein_coding |
| 0,9142106 | ARPP19   | protein_coding |
| 0,8545769 | VPS13C   | protein_coding |
| 0,3358222 | ISLR     | protein_coding |
| 0,7892243 | ANAPC13  | protein_coding |
| 0,9644268 | MBD4     | protein_coding |
| 0,9962215 | COPB1    | protein_coding |
| 0,6383874 | PSMA1    | protein_coding |
| 0,5675917 | SUMF2    | protein_coding |
| 0,6120803 | PALLD    | protein_coding |
| 0,9282881 | SPCS3    | protein_coding |
| 0,2915153 | CSRP3    | protein_coding |
| 0,115935  | DCTD     | protein_coding |
| 0,7109532 | RPAIN    | protein_coding |
| 0,4886257 | TXNDC17  | protein_coding |
| 0,6750523 | FXR2     | protein_coding |
| 0,8492407 | KIF1C    | protein_coding |
| 0,3089259 | MPDU1    | protein_coding |
| 0,8269408 | PHF20L1  | protein_coding |
| 0,8825313 | CCNT1    | protein_coding |
| 0,9975676 | PUS7L    | protein_coding |
| 0,9738194 | ILF3     | protein_coding |
| 0,9998478 | SLC44A2  | protein_coding |
| 0,7362379 | MTUS1    | protein_coding |
| 0,6184746 | NGDN     | protein_coding |
| 0,5328077 | ADCY4    | protein_coding |
| 0,6613295 | RAB2B    | protein_coding |
| 0,4602818 | BCL2L2   | protein_coding |
| 0,9536474 | PARP2    | protein_coding |
| 0,9976739 | HEATR5A  | protein_coding |
| 0,8050685 | SNX6     | protein_coding |
| 0,8545769 | EAPP     | protein_coding |
| 0,9761718 | EGLN3    | protein_coding |
| 0,8623038 | MIS18BP1 | protein_coding |
| 0,2443691 | RNASE1   | protein_coding |
| 0,4638153 | NEDD8    | protein_coding |
| 0,624851  | DAD1     | protein_coding |
| 0,9894339 | TEP1     | protein_coding |
| 0,5559368 | EPB41L4A | protein_coding |
| 0,8318664 | CDO1     | protein_coding |
| 0,5224131 | REEP5    | protein_coding |
| 0,8117718 | ITFG1    | protein_coding |
| 0,8971058 | SEC14L1  | protein_coding |
| 0,8219774 | ARHGEF6  | protein_coding |
| 0,7302504 | MAP7D3   | protein_coding |
| 0,8373584 | ASH2L    | protein_coding |
| 0,914514  | CDKN1C   | protein_coding |
| 0,7885463 | RPS4Y1   | protein_coding |
| 0,5879554 | MAU2     | protein_coding |
| 0,9998538 | TNNI3    | protein_coding |
| 0,2164941 | PUDP     | protein_coding |

|           |          |                |
|-----------|----------|----------------|
| 0,993752  | ERMARD   | protein_coding |
| 0,8721281 | PHF10    | protein_coding |
| 0,6254273 | KCNA5    | protein_coding |
| 0,6462207 | STARD8   | protein_coding |
| 0,2945575 | FAM155B  | protein_coding |
| 0,7977187 | SAT1     | protein_coding |
| 0,7230802 | GNL3L    | protein_coding |
| 0,5453655 | SH3BP4   | protein_coding |
| 0,6173428 | MOSPD2   | protein_coding |
| 0,7894641 | DOCK6    | protein_coding |
| 0,5400662 | ECSIT    | protein_coding |
| 0,6613295 | LDLR     | protein_coding |
| 0,8117718 | PRKCSH   | protein_coding |
| 0,7506449 | CNN1     | protein_coding |
| 0,8176511 | CDC16    | protein_coding |
| 0,8212084 | NECTIN2  | protein_coding |
| 0,6098976 | APOE     | protein_coding |
| 0,7357059 | LRCH2    | protein_coding |
| 0,5777776 | XPO7     | protein_coding |
| 0,7242009 | SAFB2    | protein_coding |
| 0,6527079 | RPL36    | protein_coding |
| 0,9699064 | KIF1A    | protein_coding |
| 0,9792506 | PLVAP    | protein_coding |
| 0,7433064 | SLC27A1  | protein_coding |
| 0,6287358 | COLGALT1 | protein_coding |
| 0,330331  | MRPL34   | protein_coding |
| 0,9183994 | TULP4    | protein_coding |
| 0,8941532 | SNX9     | protein_coding |
| 0,1326966 | RTN4IP1  | protein_coding |
| 0,1482066 | QRSL1    | protein_coding |
| 0,290302  | MTRES1   | protein_coding |
| 0,3765746 | RSPH3    | protein_coding |
| 0,8810791 | AFDN     | protein_coding |
| 0,8930787 | ACTN4    | protein_coding |
| 0,8555218 | STK33    | protein_coding |
| 0,5647201 | NDUFA10  | protein_coding |
| 0,7349798 | ZSWIM6   | protein_coding |
| 0,8908494 | PXDN     | protein_coding |
| 0,4724079 | PGPEP1   | protein_coding |
| 0,8318664 | LSM4     | protein_coding |
| 0,7296863 | JUND     | protein_coding |
| 0,4157638 | HRC      | protein_coding |
| 0,7876407 | ZNF557   | protein_coding |
| 0,3105619 | CAMSAP1  | protein_coding |
| 0,3830886 | UBAC1    | protein_coding |
| 0,3435348 | H19      | lncRNA         |
| 0,7213265 | COL5A1   | protein_coding |
| 0,9312186 | ATXN10   | protein_coding |
| 0,965142  | TUBGCP2  | protein_coding |
| 0,9954421 | CEP85    | protein_coding |
| 0,9884562 | LAMA5    | protein_coding |
| 0,5847346 | OSBPL2   | protein_coding |
| 0,9773277 | ASS1     | protein_coding |
| 0,8698319 | EXOSC2   | protein_coding |
| 0,6491869 | POMT1    | protein_coding |
| 0,7713242 | PRRC2B   | protein_coding |
| 0,7213265 | CHMP2A   | protein_coding |
| 0,4450378 | UBE2M    | protein_coding |
| 0,768388  | TRIM28   | protein_coding |

|           |          |                                    |
|-----------|----------|------------------------------------|
| 0,6999614 | EIF2S3   | protein_coding                     |
| 0,4911389 | ZC3H4    | protein_coding                     |
| 0,9998538 | LRRC47   | protein_coding                     |
| 0,6613295 | ATP5IF1  | protein_coding                     |
| 0,9062598 | CLIP1    | protein_coding                     |
| 0,9183247 | HIP1R    | protein_coding                     |
| 0,9998478 | ZNF317   | protein_coding                     |
| 0,8269408 | EIF3G    | protein_coding                     |
| 0,5622598 | DNMT1    | protein_coding                     |
| 0,4835164 | ZNF426   | protein_coding                     |
| 0,9481776 | SLC6A8   | protein_coding                     |
| 0,6559545 | DKC1     | protein_coding                     |
| 0,103738  | MPP1     | protein_coding                     |
| 0,2281984 | ZNF331   | protein_coding                     |
| 0,997931  | ZNF236   | protein_coding                     |
| 0,517991  | NOL11    | protein_coding                     |
| 0,7823793 | UBE4B    | protein_coding                     |
| 0,9166492 | CASZ1    | protein_coding                     |
| 0,9960707 | HABP4    | protein_coding                     |
| 0,6591549 | PRRG1    | protein_coding                     |
| 0,8105839 | UBA1     | protein_coding                     |
| 0,6203109 | RGN      | protein_coding                     |
| 0,9998478 | TXLNGY   | transcribed_unprocessed_pseudogene |
| 0,7805908 | PPIL4    | protein_coding                     |
| 0,8850351 | AKAP12   | protein_coding                     |
| 0,5456715 | SYNE1    | protein_coding                     |
| 0,817424  | LATS1    | protein_coding                     |
| 0,8992483 | AAR2     | protein_coding                     |
| 0,8833312 | RBM39    | protein_coding                     |
| 0,4360201 | ACSS2    | protein_coding                     |
| 0,4810647 | ARHGEF9  | protein_coding                     |
| 0,3218826 | ATP6V1E1 | protein_coding                     |
| 0,9669517 | ZNF227   | protein_coding                     |
| 0,7258655 | ZNF141   | protein_coding                     |
| 0,3779824 | COX4I1   | protein_coding                     |
| 0,6184079 | EMC8     | protein_coding                     |
| 0,8017181 | GSE1     | protein_coding                     |
| 0,8996562 | CHMP1A   | protein_coding                     |
| 0,931978  | SH3BGRL  | protein_coding                     |
| 0,1129731 | COX7B    | protein_coding                     |
| 0,8575378 | CAP1     | protein_coding                     |
| 0,9368504 | PPT1     | protein_coding                     |
| 0,9544158 | RLIM     | protein_coding                     |
| 0,5175488 | ABCB7    | protein_coding                     |
| 0,3386759 | TRAF3    | protein_coding                     |
| 0,0286685 | MRPS25   | protein_coding                     |
| 0,8704958 | HACL1    | protein_coding                     |
| 0,6594711 | TBC1D5   | protein_coding                     |
| 0,9406097 | CAPN7    | protein_coding                     |
| 0,7915374 | RFTN1    | protein_coding                     |
| 0,5474737 | RBSN     | protein_coding                     |
| 0,2393106 | GALNT15  | protein_coding                     |
| 0,2281984 | SLC6A6   | protein_coding                     |
| 0,9997651 | NR1H2    | protein_coding                     |
| 0,9982092 | KIF3A    | protein_coding                     |
| 0,8870682 | MGAT1    | protein_coding                     |
| 0,7132753 | GFPT2    | protein_coding                     |
| 0,5011485 | PSME3    | protein_coding                     |
| 0,9951314 | RPL27    | protein_coding                     |

|           |          |                |
|-----------|----------|----------------|
| 0,6557182 | AOC3     | protein_coding |
| 0,284683  | ACLY     | protein_coding |
| 0,66699   | VPS25    | protein_coding |
| 0,6403073 | NDUFA2   | protein_coding |
| 0,9729242 | DIAPH1   | protein_coding |
| 0,7027821 | NDFIP1   | protein_coding |
| 0,6448972 | UBE2D2   | protein_coding |
| 0,6287358 | EXOC4    | protein_coding |
| 0,3903182 | ANO1     | protein_coding |
| 0,7444016 | PPFIA1   | protein_coding |
| 0,4602818 | MAP1B    | protein_coding |
| 0,5317229 | IL13RA1  | protein_coding |
| 0,54642   | WDR44    | protein_coding |
| 0,452318  | CKMT2    | protein_coding |
| 0,8885864 | ZCCHC9   | protein_coding |
| 0,9781148 | PEX11B   | protein_coding |
| 0,8545769 | PRKAB2   | protein_coding |
| 0,176447  | PDHA1    | protein_coding |
| 0,6383874 | MCCC2    | protein_coding |
| 0,7558125 | ZNF304   | protein_coding |
| 0,9709611 | ZNF132   | protein_coding |
| 0,6903585 | SELENOS  | protein_coding |
| 0,7027821 | CHSY1    | protein_coding |
| 0,3194617 | SNRPA1   | protein_coding |
| 0,7490465 | THAP1    | protein_coding |
| 0,3801685 | C19orf12 | protein_coding |
| 0,4675238 | ACTR10   | protein_coding |
| 0,9007686 | LGALS3   | protein_coding |
| 0,0546553 | DNAJB1   | protein_coding |
| 0,9789395 | SPATA6   | protein_coding |
| 0,7816267 | LRRC41   | protein_coding |
| 0,9802452 | DHX30    | protein_coding |
| 0,3358222 | RAF1     | protein_coding |
| 0,8851892 | PPARG    | protein_coding |
| 0,582571  | ENOSF1   | protein_coding |
| 0,2663408 | EMILIN2  | protein_coding |
| 0,7924243 | ARFIP2   | protein_coding |
| 0,7190863 | TRIM22   | protein_coding |
| 0,8189129 | RRP8     | protein_coding |
| 0,9702772 | TIMM10B  | protein_coding |
| 0,8930787 | EFR3A    | protein_coding |
| 0,9363291 | PTCD3    | protein_coding |
| 0,6238595 | IMMT     | protein_coding |
| 0,5943287 | MRPL35   | protein_coding |
| 0,985846  | ILKAP    | protein_coding |
| 0,0465925 | PER2     | protein_coding |
| 0,5020851 | RAMP1    | protein_coding |
| 0,6137496 | PTPRE    | protein_coding |
| 0,6383874 | RAN      | protein_coding |
| 0,6659037 | PRKAA1   | protein_coding |
| 0,9439974 | CARD6    | protein_coding |
| 0,1412577 | RAP1GAP2 | protein_coding |
| 0,9768456 | CLUH     | protein_coding |
| 0,8934536 | INPP5K   | protein_coding |
| 0,940196  | RPA1     | protein_coding |
| 0,5777334 | SERPINF1 | protein_coding |
| 0,9738194 | UBE2G1   | protein_coding |
| 0,9660499 | TBC1D14  | protein_coding |
| 0,9209064 | TMEM128  | protein_coding |



|           |          |                                  |
|-----------|----------|----------------------------------|
| 0,1356666 | COQ3     | protein_coding                   |
| 0,9481776 | PNISR    | protein_coding                   |
| 0,2281984 | POPDC3   | protein_coding                   |
| 0,4835164 | SEC61G   | protein_coding                   |
| 0,9839612 | LANCL2   | protein_coding                   |
| 0,8131645 | FIGNL1   | protein_coding                   |
| 0,2492279 | GRSF1    | protein_coding                   |
| 0,931978  | ANKRD17  | protein_coding                   |
| 0,9206489 | UTP3     | protein_coding                   |
| 0,7174713 | WBP2     | protein_coding                   |
| 0,9528743 | H3F3B    | protein_coding                   |
| 0,8553465 | UNK      | protein_coding                   |
| 0,7671658 | ZRANB2   | protein_coding                   |
| 0,6446908 | EIF5A    | protein_coding                   |
| 0,5318944 | XAF1     | protein_coding                   |
| 0,624851  | RIDA     | protein_coding                   |
| 0,8565534 | VPS13B   | protein_coding                   |
| 0,4045325 | MATN2    | protein_coding                   |
| 0,9488066 | PCBD2    | protein_coding                   |
| 0,5248895 | SDF2     | protein_coding                   |
| 0,7506449 | FLOT2    | protein_coding                   |
| 0,7673893 | PRMT7    | protein_coding                   |
| 0,7558125 | TERF2    | protein_coding                   |
| 0,8653179 | VPS4A    | protein_coding                   |
| 0,7609122 | BTBD3    | protein_coding                   |
| 0,6624016 | PCNA     | protein_coding                   |
| 0,9919804 | POLR3F   | protein_coding                   |
| 0,9700303 | RIN2     | protein_coding                   |
| 0,1712026 | PTPRA    | protein_coding                   |
| 0,5847346 | DAP3     | protein_coding                   |
| 0,8661642 | KHDC4    | protein_coding                   |
| 0,5402971 | NES      | protein_coding                   |
| 0,9169269 | ARHGEF11 | protein_coding                   |
| 0,8318538 | DCAF8    | protein_coding                   |
| 0,8318519 | SYT11    | protein_coding                   |
| 0,5847346 | MMACHC   | protein_coding                   |
| 0,7972313 | NASP     | protein_coding                   |
| 0,5347705 | CTNNB1   | protein_coding                   |
| 0,4073279 | RBM38    | protein_coding                   |
| 0,4971178 | VSTM2L   | protein_coding                   |
| 0,9998478 | OSER1    | protein_coding                   |
| 0,7921707 | SERINC3  | protein_coding                   |
| 0,2184644 | BHMT2    | protein_coding                   |
| 0,6873469 | AP3B1    | protein_coding                   |
| 0,4422012 | PATJ     | protein_coding                   |
| 0,8721867 | DCTN4    | protein_coding                   |
| 0,7054786 | MTUS2    | protein_coding                   |
| 0,9492532 | ZMYM5    | protein_coding                   |
| 0,9444553 | USPL1    | protein_coding                   |
| 0,9528743 | XPO4     | protein_coding                   |
| 0,2148035 | POMP     | protein_coding                   |
| 0,54642   | CDK8     | protein_coding                   |
| 0,9439974 | HMGB1P5  | transcribed_processed_pseudogene |
| 0,7146386 | WASF3    | protein_coding                   |
| 0,0469777 | MYH10    | protein_coding                   |
| 0,6986378 | SCO1     | protein_coding                   |
| 0,7010516 | MPRIIP   | protein_coding                   |
| 0,9450135 | PIK3C2B  | protein_coding                   |
| 0,8538999 | DSTYK    | protein_coding                   |

|           |          |                                    |
|-----------|----------|------------------------------------|
| 0,6563172 | SLC41A1  | protein_coding                     |
| 0,1367817 | DCLK1    | protein_coding                     |
| 0,997931  | COG6     | protein_coding                     |
| 0,8416675 | SPART    | protein_coding                     |
| 0,1667775 | POSTN    | protein_coding                     |
| 0,9341044 | TPT1     | protein_coding                     |
| 0,8812706 | GPALPP1  | protein_coding                     |
| 0,1524221 | STARD13  | protein_coding                     |
| 0,2687129 | MORC4    | protein_coding                     |
| 0,4888513 | TBC1D8B  | protein_coding                     |
| 0,7393702 | TCEAL4   | protein_coding                     |
| 0,7444016 | SRRM1    | protein_coding                     |
| 0,7431973 | SLF1     | protein_coding                     |
| 0,6689227 | CNDP2    | protein_coding                     |
| 0,9946475 | RTN3     | protein_coding                     |
| 0,9994264 | MYH11    | protein_coding                     |
| 0,8474324 | FOPNL    | protein_coding                     |
| 0,9907221 | PDZD2    | protein_coding                     |
| 0,9348712 | MORC2    | protein_coding                     |
| 0,9551108 | LARGE1   | protein_coding                     |
| 0,7611852 | MYO18B   | protein_coding                     |
| 0,6988495 | SLC2A11  | protein_coding                     |
| 0,6787299 | GIMAP6   | protein_coding                     |
| 0,7894641 | GIMAP4   | protein_coding                     |
| 0,7126808 | MKRN1    | protein_coding                     |
| 0,6776791 | ZNF767P  | transcribed_unprocessed_pseudogene |
| 0,5675917 | BTG1     | protein_coding                     |
| 0,9439974 | C12orf29 | protein_coding                     |
| 0,5980078 | ATP13A3  | protein_coding                     |
| 0,1232731 | TMTC1    | protein_coding                     |
| 0,7743102 | KRAS     | protein_coding                     |
| 0,6527079 | IPO8     | protein_coding                     |
| 0,7820244 | LARS     | protein_coding                     |
| 0,4787761 | IMPA1    | protein_coding                     |
| 0,6620763 | LRRCC1   | protein_coding                     |
| 0,8877092 | CCDC59   | protein_coding                     |
| 0,8062191 | SWAP70   | protein_coding                     |
| 0,0088417 | ARNTL    | protein_coding                     |
| 0,0247233 | LYVE1    | protein_coding                     |
| 0,8885864 | SBF2     | protein_coding                     |
| 0,0336588 | MICAL2   | protein_coding                     |
| 0,7431973 | RRAS2    | protein_coding                     |
| 0,5040596 | HSD17B4  | protein_coding                     |
| 0,7687197 | ZFC3H1   | protein_coding                     |
| 0,5415916 | SARAF    | protein_coding                     |
| 0,9296784 | DUSP26   | protein_coding                     |
| 0,8992483 | DPF2     | protein_coding                     |
| 0,9438763 | DGLUCY   | protein_coding                     |
| 0,9424246 | NUMB     | protein_coding                     |
| 0,9848567 | MED6     | protein_coding                     |
| 0,4672216 | EIF2S1   | protein_coding                     |
| 0,9496064 | ELP3     | protein_coding                     |
| 0,5679388 | PEBP4    | protein_coding                     |
| 0,7576959 | CTIF     | protein_coding                     |
| 0,9362082 | MBD2     | protein_coding                     |
| 0,3994613 | IER3IP1  | protein_coding                     |
| 0,284683  | MRPS36   | protein_coding                     |
| 0,4684923 | THUMPD3  | protein_coding                     |
| 0,747138  | BHLHE40  | protein_coding                     |

|           |           |                |
|-----------|-----------|----------------|
| 0,9975676 | ARL8B     | protein_coding |
| 0,3929033 | EDEM1     | protein_coding |
| 0,0473067 | CHL1      | protein_coding |
| 0,4765298 | MEIS2     | protein_coding |
| 0,6613295 | DPH6      | protein_coding |
| 0,9772493 | KATNBL1   | protein_coding |
| 0,1520655 | EMC7      | protein_coding |
| 0,9776997 | PRPF38B   | protein_coding |
| 0,5015091 | GSTM3     | protein_coding |
| 0,9583561 | SORT1     | protein_coding |
| 0,8823913 | WNT2B     | protein_coding |
| 0,792656  | PTGFRN    | protein_coding |
| 0,2205761 | LAMTOR5   | protein_coding |
| 0,4222683 | NOTCH2    | protein_coding |
| 0,7820981 | TRIM45    | protein_coding |
| 0,9142106 | CEPT1     | protein_coding |
| 0,9277595 | AP4B1     | protein_coding |
| 0,8632902 | NAPG      | protein_coding |
| 0,4835164 | SPIRE1    | protein_coding |
| 0,8270848 | PPHLN1    | protein_coding |
| 0,5474737 | ARF3      | protein_coding |
| 0,6664224 | TMEM106C  | protein_coding |
| 0,824287  | SLC38A2   | protein_coding |
| 0,1140347 | YWHAQ     | protein_coding |
| 0,3803906 | KIDINS220 | protein_coding |
| 0,9387004 | ROCK2     | protein_coding |
| 0,9463928 | RSAD2     | protein_coding |
| 0,6867028 | LPIN1     | protein_coding |
| 0,7820244 | IAH1      | protein_coding |
| 0,2535482 | LDHA      | protein_coding |
| 0,9625694 | IL6ST     | protein_coding |
| 0,9977992 | NAV1      | protein_coding |
| 0,9118315 | CDC73     | protein_coding |
| 0,0488716 | TIMM17A   | protein_coding |
| 0,768388  | RPS15A    | protein_coding |
| 0,9377639 | NARS      | protein_coding |
| 0,845681  | RELCH     | protein_coding |
| 0,922549  | FBH1      | protein_coding |
| 0,2533818 | RBM17     | protein_coding |
| 0,9953531 | ECHDC3    | protein_coding |
| 0,5506008 | CCNH      | protein_coding |
| 0,8597029 | KCTD1     | protein_coding |
| 0,887319  | DOCK2     | protein_coding |
| 0,9802452 | EMP1      | protein_coding |
| 0,5647201 | SOX5      | protein_coding |
| 0,9484395 | LRP4      | protein_coding |
| 0,9854182 | MYBPC3    | protein_coding |
| 0,8166471 | ACP2      | protein_coding |
| 0,9166492 | RTL8C     | protein_coding |
| 0,9925374 | RBMX2     | protein_coding |
| 0,6059615 | PUM1      | protein_coding |
| 0,1869543 | YARS      | protein_coding |
| 0,4311333 | PHC2      | protein_coding |
| 0,7368645 | GNL2      | protein_coding |
| 0,9997554 | AGO4      | protein_coding |
| 0,8831297 | HOOK1     | protein_coding |
| 0,8882787 | CYP2J2    | protein_coding |
| 0,8674207 | BTF3L4    | protein_coding |
| 0,9533676 | TUT4      | protein_coding |

|           |          |                |
|-----------|----------|----------------|
| 0,9215449 | PRPF38A  | protein_coding |
| 0,4562339 | DSC2     | protein_coding |
| 0,931978  | RNF138   | protein_coding |
| 0,6591549 | ELP2     | protein_coding |
| 0,9237476 | DSC1     | protein_coding |
| 0,2945575 | DTNA     | protein_coding |
| 0,9792506 | FHOD3    | protein_coding |
| 0,9364287 | TPGS2    | protein_coding |
| 0,330331  | SLC43A3  | protein_coding |
| 0,8786805 | APLNR    | protein_coding |
| 0,4175635 | FADS2    | protein_coding |
| 0,8198317 | TMEM258  | protein_coding |
| 0,7320389 | TMEM165  | protein_coding |
| 0,7968733 | CLOCK    | protein_coding |
| 0,673546  | PDGFRA   | protein_coding |
| 0,8992483 | COL4A2   | protein_coding |
| 0,5060296 | DZIP1    | protein_coding |
| 0,8422988 | UBAC2    | protein_coding |
| 0,8076343 | ARGLU1   | protein_coding |
| 0,7190863 | BIVM     | protein_coding |
| 0,7095541 | TPP2     | protein_coding |
| 0,8189129 | CARS2    | protein_coding |
| 0,6337897 | ARHGAP32 | protein_coding |
| 0,9170247 | STT3A    | protein_coding |
| 0,8255851 | ETS1     | protein_coding |
| 0,8189556 | TMED7    | protein_coding |
| 0,916788  | APC      | protein_coding |
| 0,7444016 | NREP     | protein_coding |
| 0,8626487 | WDR36    | protein_coding |
| 0,9131236 | OSTF1    | protein_coding |
| 0,6727601 | RFK      | protein_coding |
| 0,8487116 | UBQLN1   | protein_coding |
| 0,90504   | NAA35    | protein_coding |
| 0,7740102 | ANXA1    | protein_coding |
| 0,0336588 | CTSL     | protein_coding |
| 0,7546576 | CEMIP2   | protein_coding |
| 0,3706065 | AGTPBP1  | protein_coding |
| 0,3435348 | GOLM1    | protein_coding |
| 0,9670362 | FAM189A2 | protein_coding |
| 0,6305527 | ISCA1    | protein_coding |
| 0,7558125 | ADAM19   | protein_coding |
| 0,8076343 | TAOK3    | protein_coding |
| 0,5768837 | USP30    | protein_coding |
| 0,9312186 | FBXO21   | protein_coding |
| 0,0473388 | TBX3     | protein_coding |
| 0,4612267 | TRAFD1   | protein_coding |
| 0,8440006 | DMTF1    | protein_coding |
| 0,8901085 | CCDC146  | protein_coding |
| 0,6662301 | CD36     | protein_coding |
| 0,6475905 | PNPLA8   | protein_coding |
| 0,8865445 | RINT1    | protein_coding |
| 0,583756  | SRPK2    | protein_coding |
| 0,3089259 | TES      | protein_coding |
| 0,4495398 | MDFIC    | protein_coding |
| 0,8561022 | MTO1     | protein_coding |
| 0,8670918 | ANKRD6   | protein_coding |
| 0,6157478 | CEP162   | protein_coding |
| 0,8941532 | SYNCRIP  | protein_coding |
| 0,8289966 | SNX14    | protein_coding |

|           |           |                |
|-----------|-----------|----------------|
| 0,3202177 | NT5E      | protein_coding |
| 0,9406097 | EPHA7     | protein_coding |
| 0,9804708 | AKIRIN2   | protein_coding |
| 0,7740102 | ORC3      | protein_coding |
| 0,7763012 | LCA5      | protein_coding |
| 0,9803555 | MAP3K7    | protein_coding |
| 0,933129  | PHF21A    | protein_coding |
| 0,9064117 | NAT10     | protein_coding |
| 0,6776791 | CAPRIN1   | protein_coding |
| 0,3803906 | ATP5MC2   | protein_coding |
| 0,7095541 | CD63      | protein_coding |
| 0,305334  | GDF11     | protein_coding |
| 0,8495694 | ITGA7     | protein_coding |
| 0,7558125 | BLOC1S1   | protein_coding |
| 0,4957019 | CDK4      | protein_coding |
| 0,2774991 | PPP1R1A   | protein_coding |
| 0,9112805 | TSPAN31   | protein_coding |
| 0,7956173 | TFCP2     | protein_coding |
| 0,1779442 | COQ10A    | protein_coding |
| 0,949756  | PAN2      | protein_coding |
| 0,3480863 | HNRNPA1   | protein_coding |
| 0,7956408 | ACVR1B    | protein_coding |
| 0,7253153 | OS9       | protein_coding |
| 0,5117223 | LTV1      | protein_coding |
| 0,9925374 | CD164     | protein_coding |
| 0,7352523 | AFG1L     | protein_coding |
| 0,290302  | NHSL1     | protein_coding |
| 0,8711676 | AHI1      | protein_coding |
| 0,5879554 | MICAL1    | protein_coding |
| 0,6621874 | REPS1     | protein_coding |
| 0,3264373 | PRADC1    | protein_coding |
| 0,3830886 | CCT7      | protein_coding |
| 0,9998538 | RAB11FIP5 | protein_coding |
| 0,9998478 | SMYD5     | protein_coding |
| 0,7244173 | DYSF      | protein_coding |
| 0,7213265 | USP15     | protein_coding |
| 0,5801848 | GNS       | protein_coding |
| 0,692146  | CPM       | protein_coding |
| 0,9142106 | MDM2      | protein_coding |
| 0,7318327 | KLHL36    | protein_coding |
| 0,7010516 | KIAA0513  | protein_coding |
| 0,2332141 | DYNC1LI2  | protein_coding |
| 0,993752  | AGT       | protein_coding |
| 0,3587016 | KCNK1     | protein_coding |
| 0,6416356 | COG2      | protein_coding |
| 0,654521  | ABCB10    | protein_coding |
| 0,4103148 | NTPCR     | protein_coding |
| 0,997931  | TAF5L     | protein_coding |
| 0,1674733 | GLUL      | protein_coding |
| 0,2945575 | STX6      | protein_coding |
| 0,8619772 | RNASEL    | protein_coding |
| 0,922549  | DHX9      | protein_coding |
| 0,9136442 | CEP350    | protein_coding |
| 0,8992483 | NIBAN1    | protein_coding |
| 0,9652509 | PIGC      | protein_coding |
| 0,9700303 | LAMC1     | protein_coding |
| 0,8622295 | RC3H1     | protein_coding |
| 0,9397602 | SP110     | protein_coding |
| 0,6244656 | MRPL44    | protein_coding |

|           |           |                      |
|-----------|-----------|----------------------|
| 0,4141191 | DOCK10    | protein_coding       |
| 0,953175  | USP37     | protein_coding       |
| 0,9352317 | ITM2C     | protein_coding       |
| 0,4638153 | SERPINE2  | protein_coding       |
| 0,6673583 | DNAJB2    | protein_coding       |
| 0,9477062 | TMBIM1    | protein_coding       |
| 0,0829375 | CYP27A1   | protein_coding       |
| 0,8882787 | EIF4E2    | protein_coding       |
| 0,6232447 | CAB39     | protein_coding       |
| 0,3803906 | COX5B     | protein_coding       |
| 0,9789395 | REV1      | protein_coding       |
| 0,922549  | TMEM127   | protein_coding       |
| 0,5164856 | TGFBRAP1  | protein_coding       |
| 0,7118106 | GCC2      | protein_coding       |
| 0,2012728 | MRPS9     | protein_coding       |
| 0,7426221 | C2orf49   | protein_coding       |
| 0,7639764 | ANKRD36   | protein_coding       |
| 0,6371005 | EPC2      | protein_coding       |
| 0,7892243 | ISCU      | protein_coding       |
| 0,9933219 | ALDH1L2   | protein_coding       |
| 0,764019  | SCYL2     | protein_coding       |
| 0,5844756 | CKAP4     | protein_coding       |
| 0,9039795 | PLXNC1    | protein_coding       |
| 0,9182782 | APPL2     | protein_coding       |
| 0,9781148 | PWP1      | protein_coding       |
| 0,5474737 | DRAM1     | protein_coding       |
| 0,9731251 | WASHC4    | protein_coding       |
| 0,2354584 | SLC41A2   | protein_coding       |
| 0,9490174 | FLNB      | protein_coding       |
| 0,7385573 | NEK3      | protein_coding       |
| 0,5511615 | VPS36     | protein_coding       |
| 0,4724079 | RNASEH2B  | protein_coding       |
| 0,9986615 | CKAP2     | protein_coding       |
| 0,9738194 | TBC1D4    | protein_coding       |
| 0,8930787 | THSD1     | protein_coding       |
| 0,902171  | LRCH1     | protein_coding       |
| 0,4045325 | SUCLA2    | protein_coding       |
| 0,998169  | RCBTB1    | protein_coding       |
| 0,7211115 | MED4      | protein_coding       |
| 0,9731251 | PHF11     | protein_coding       |
| 0,654521  | RPL13AP25 | processed_pseudogene |
| 0,7235397 | COG3      | protein_coding       |
| 0,8360601 | LMO7      | protein_coding       |
| 0,7842247 | ITM2B     | protein_coding       |
| 0,466638  | SPRY2     | protein_coding       |
| 0,4872295 | NUDT15    | protein_coding       |
| 0,3406074 | EDNRB     | protein_coding       |
| 0,6653209 | RCBTB2    | protein_coding       |
| 0,7972313 | LCPI      | protein_coding       |
| 0,8213028 | SETDB2    | protein_coding       |
| 0,2529607 | SCRN1     | protein_coding       |
| 0,4835164 | TNS3      | protein_coding       |
| 0,8919058 | GPNMB     | protein_coding       |
| 0,7611529 | RAPGEF5   | protein_coding       |
| 0,9406097 | RAC1      | protein_coding       |
| 0,8869707 | KDELRL2   | protein_coding       |
| 0,7639764 | NUP42     | protein_coding       |
| 0,6760314 | ZDHHC4    | protein_coding       |
| 0,4535149 | BZW2      | protein_coding       |

|           |           |                |
|-----------|-----------|----------------|
| 0,7805908 | TBRG4     | protein_coding |
| 0,9296784 | DDX56     | protein_coding |
| 0,9997039 | HUS1      | protein_coding |
| 0,983457  | DBNL      | protein_coding |
| 0,8930787 | CCM2      | protein_coding |
| 0,4737234 | TTC5      | protein_coding |
| 0,5964345 | ADAMTS7   | protein_coding |
| 0,8861906 | IREB2     | protein_coding |
| 0,4835164 | ALPK3     | protein_coding |
| 0,0396848 | CALCOCO2  | protein_coding |
| 0,6160654 | RSAD1     | protein_coding |
| 0,9828457 | NMT1      | protein_coding |
| 0,9792506 | SRSF1     | protein_coding |
| 0,9074092 | VEZF1     | protein_coding |
| 0,3178501 | TACO1     | protein_coding |
| 0,7196031 | TEX2      | protein_coding |
| 0,9709611 | DCAF7     | protein_coding |
| 0,9731416 | KAT7      | protein_coding |
| 0,8500846 | ACTL6A    | protein_coding |
| 0,5765517 | NDUFB5    | protein_coding |
| 0,3177457 | MRPL47    | protein_coding |
| 0,9884562 | TRA2B     | protein_coding |
| 0,7921707 | MARCH7    | protein_coding |
| 0,579213  | SCN7A     | protein_coding |
| 0,8609959 | TANK      | protein_coding |
| 0,9738194 | GATA4     | protein_coding |
| 0,3358222 | SKIL      | protein_coding |
| 0,7713242 | EPRS      | protein_coding |
| 0,9538485 | VPS45     | protein_coding |
| 0,9312186 | KCTD3     | protein_coding |
| 0,9956922 | RPS6KC1   | protein_coding |
| 0,3776155 | CBWD2     | protein_coding |
| 0,931978  | SMPD4     | protein_coding |
| 0,7444016 | WDR33     | protein_coding |
| 0,4260926 | CCDC115   | protein_coding |
| 0,933129  | SAP130    | protein_coding |
| 0,8118149 | IMP4      | protein_coding |
| 0,9802452 | UGGT1     | protein_coding |
| 0,3435112 | GYPC      | protein_coding |
| 0,2948143 | STAM      | protein_coding |
| 0,3919684 | ABI1      | protein_coding |
| 0,9424246 | YME1L1    | protein_coding |
| 0,9792506 | DNAJC1    | protein_coding |
| 0,796666  | NIPSNAP3A | protein_coding |
| 0,8578793 | LRRC8A    | protein_coding |
| 0,7309037 | CDK9      | protein_coding |
| 0,7576959 | TXN       | protein_coding |
| 0,3524133 | ODF2      | protein_coding |
| 0,3651489 | ECPAS     | protein_coding |
| 0,9792506 | TOR1B     | protein_coding |
| 0,7558125 | C9orf78   | protein_coding |
| 0,6254273 | SMC2      | protein_coding |
| 0,3943278 | KLF4      | protein_coding |
| 0,9102206 | TOR1A     | protein_coding |
| 0,9700303 | RALGPS1   | protein_coding |
| 0,997931  | NIBAN2    | protein_coding |
| 0,9854182 | TMOD1     | protein_coding |
| 0,9497298 | DAB2IP    | protein_coding |
| 0,9463928 | STXBP1    | protein_coding |

|           |          |                |
|-----------|----------|----------------|
| 0,2712333 | ANGPTL2  | protein_coding |
| 0,7467854 | CDK5RAP2 | protein_coding |
| 0,6184746 | SLC31A1  | protein_coding |
| 0,8736463 | TLR4     | protein_coding |
| 0,3792977 | ZNF189   | protein_coding |
| 0,8881504 | STX17    | protein_coding |
| 0,8903094 | PRPF4    | protein_coding |
| 0,4835164 | FPGS     | protein_coding |
| 0,6604792 | ATP6V1G1 | protein_coding |
| 0,8131645 | TEX10    | protein_coding |
| 0,6898216 | GARNL3   | protein_coding |
| 0,4806087 | MRPL50   | protein_coding |
| 0,9067454 | TSTD2    | protein_coding |
| 0,1500522 | PSMB7    | protein_coding |
| 0,9465232 | GOLGA1   | protein_coding |
| 0,9925374 | XPA      | protein_coding |
| 0,9583708 | NCBP1    | protein_coding |
| 0,7639764 | ANP32B   | protein_coding |
| 0,8868311 | PDCL     | protein_coding |
| 0,8545769 | RPL35    | protein_coding |
| 0,8116293 | ARPC5L   | protein_coding |
| 0,9955768 | ENPP2    | protein_coding |
| 0,8189129 | DERL1    | protein_coding |
| 0,9305033 | MYC      | protein_coding |
| 0,9233889 | IL33     | protein_coding |
| 0,8890564 | DMAC1    | protein_coding |
| 0,4344504 | RANBP6   | protein_coding |
| 0,4835164 | POLR1E   | protein_coding |
| 0,6676251 | PLAA     | protein_coding |
| 0,9427242 | IL11RA   | protein_coding |
| 0,90504   | UBAP2    | protein_coding |
| 0,4160411 | APTX     | protein_coding |
| 0,2945575 | RNF38    | protein_coding |
| 0,7049962 | TLN1     | protein_coding |
| 0,6662301 | DNAJB5   | protein_coding |
| 0,9233889 | DCTN3    | protein_coding |
| 0,3953915 | TMEM8B   | protein_coding |
| 0,8721867 | GRHPR    | protein_coding |
| 0,8023631 | ALDH1B1  | protein_coding |
| 0,9934576 | DENND4C  | protein_coding |
| 0,633922  | RPS6     | protein_coding |
| 0,0225992 | PPIL1    | protein_coding |
| 0,7114715 | KLC4     | protein_coding |
| 0,1067405 | KIF13A   | protein_coding |
| 0,4740961 | ZSCAN9   | protein_coding |
| 0,3000115 | PIM1     | protein_coding |
| 0,3803906 | GMPR     | protein_coding |
| 0,9194718 | CMTR1    | protein_coding |
| 0,824287  | YIPF3    | protein_coding |
| 0,6322951 | TMEM14B  | protein_coding |
| 0,4466289 | TMEM63B  | protein_coding |
| 0,4929726 | TUBB2A   | protein_coding |
| 0,8930787 | RIPK1    | protein_coding |
| 0,517991  | UQCC2    | protein_coding |
| 0,445647  | FLOT1    | protein_coding |
| 0,8670918 | MDC1     | protein_coding |
| 0,5578794 | TPMT     | protein_coding |
| 0,1067405 | RNF144B  | protein_coding |
| 0,6584077 | MTCH1    | protein_coding |



|           |         |                |
|-----------|---------|----------------|
| 0,6023346 | TAF8    | protein_coding |
| 0,6673583 | FAM8A1  | protein_coding |
| 0,9359783 | CPEB2   | protein_coding |
| 0,8454927 | TLR2    | protein_coding |
| 0,696332  | FCHSD2  | protein_coding |
| 0,7558125 | ARRB1   | protein_coding |
| 0,654521  | SLCO2B1 | protein_coding |
| 0,4806087 | THAP12  | protein_coding |
| 0,4408807 | NUMA1   | protein_coding |
| 0,9995727 | CCDC90B | protein_coding |
| 0,4954628 | SYTL2   | protein_coding |
| 0,8185595 | RAB30   | protein_coding |
| 0,8117718 | CREBZF  | protein_coding |
| 0,8597029 | LRRC32  | protein_coding |
| 0,8703454 | PRCP    | protein_coding |
| 0,9771336 | NARS2   | protein_coding |
| 0,7965978 | RNF121  | protein_coding |
| 0,0845999 | MRPL15  | protein_coding |
| 0,4835164 | SLCO5A1 | protein_coding |
| 0,1916186 | SULF1   | protein_coding |
| 0,9789623 | TGS1    | protein_coding |
| 0,2748973 | SDCBP   | protein_coding |
| 0,8221205 | NEK1    | protein_coding |
| 0,3447404 | DDX60   | protein_coding |
| 0,8114908 | SORL1   | protein_coding |
| 0,5747726 | DCUN1D5 | protein_coding |
| 0,3187319 | YAP1    | protein_coding |
| 0,855954  | RDX     | protein_coding |
| 0,7639764 | PPP2R1B | protein_coding |
| 0,2440137 | FDX1    | protein_coding |
| 0,6160654 | CASP1   | protein_coding |
| 0,9463928 | ALKBH8  | protein_coding |
| 0,939763  | MAP2K5  | protein_coding |
| 0,784306  | CTDSPL2 | protein_coding |
| 0,922549  | SLTM    | protein_coding |
| 0,2174016 | THBS1   | protein_coding |
| 0,7956789 | MAPKBP1 | protein_coding |
| 0,2337466 | NDUFAF1 | protein_coding |
| 0,4806087 | ITGA11  | protein_coding |
| 0,9998538 | HAUS2   | protein_coding |
| 0,8038845 | RTF1    | protein_coding |
| 0,7122541 | PARP6   | protein_coding |
| 0,8934536 | RPLP1   | protein_coding |
| 0,6229784 | LRRC49  | protein_coding |
| 0,7764724 | TUBGCP4 | protein_coding |
| 0,8908494 | RMDN3   | protein_coding |
| 0,6516554 | UACA    | protein_coding |
| 0,1131434 | SMAD6   | protein_coding |
| 0,5020851 | TMEM62  | protein_coding |
| 0,8930787 | ADAM10  | protein_coding |
| 0,8992483 | ZNF280D | protein_coding |
| 0,6140495 | SEMA6D  | protein_coding |
| 0,8682129 | RSL24D1 | protein_coding |
| 0,1712026 | GCOM1   | protein_coding |
| 0,9700303 | BCAR3   | protein_coding |
| 0,4721853 | TTLL7   | protein_coding |
| 0,9997554 | FNBP1L  | protein_coding |
| 0,8554227 | KYAT3   | protein_coding |
| 0,9625751 | GTF2B   | protein_coding |

|           |          |                      |
|-----------|----------|----------------------|
| 0,6611168 | RABGGTB  | protein_coding       |
| 0,9803555 | IFI44L   | protein_coding       |
| 0,4039226 | ARHGAP29 | protein_coding       |
| 0,9484395 | IFI44    | protein_coding       |
| 0,997931  | RPL7P9   | processed_pseudogene |
| 0,7932064 | DBT      | protein_coding       |
| 0,6025953 | RTCA     | protein_coding       |
| 0,7291201 | IFT172   | protein_coding       |
| 0,5308826 | SELENOI  | protein_coding       |
| 0,3496454 | HADHB    | protein_coding       |
| 0,2971924 | ADCY3    | protein_coding       |
| 0,3803906 | PPM1B    | protein_coding       |
| 0,2841212 | PNPT1    | protein_coding       |
| 0,4894579 | DYNC2LI1 | protein_coding       |
| 0,6059615 | THUMPD2  | protein_coding       |
| 0,8301309 | CYP1B1   | protein_coding       |
| 0,645515  | RAB1A    | protein_coding       |
| 0,9738194 | ACTR2    | protein_coding       |
| 0,9998478 | PREB     | protein_coding       |
| 0,9781971 | PREPL    | protein_coding       |
| 0,8295224 | FBXO11   | protein_coding       |
| 0,7688687 | ATRAID   | protein_coding       |
| 0,8578793 | LRPPRC   | protein_coding       |
| 0,7178359 | TRIM54   | protein_coding       |
| 0,5021482 | ACTR1A   | protein_coding       |
| 0,578003  | MYOF     | protein_coding       |
| 0,5187247 | STAMBPL1 | protein_coding       |
| 0,4649064 | ATAD1    | protein_coding       |
| 0,8161522 | TACC2    | protein_coding       |
| 0,654521  | DUSP5    | protein_coding       |
| 0,0727176 | ARL3     | protein_coding       |
| 0,9205351 | KIF20B   | protein_coding       |
| 0,5537742 | ENTPD1   | protein_coding       |
| 0,7137584 | EXOC6    | protein_coding       |
| 0,2533191 | PLCE1    | protein_coding       |
| 0,817424  | DNAJC13  | protein_coding       |
| 0,9296784 | ANXA7    | protein_coding       |
| 0,9142106 | FAM149B1 | protein_coding       |
| 0,2560075 | ASCC1    | protein_coding       |
| 0,933129  | RPS24    | protein_coding       |
| 0,8921822 | TET1     | protein_coding       |
| 0,5677206 | MYPN     | protein_coding       |
| 0,7972313 | AOX1     | protein_coding       |
| 0,6128477 | ATIC     | protein_coding       |
| 0,8238032 | SMARCAL1 | protein_coding       |
| 0,8492407 | BARD1    | protein_coding       |
| 0,5953122 | STAT4    | protein_coding       |
| 0,9967216 | CARF     | protein_coding       |
| 0,3894807 | ASNSD1   | protein_coding       |
| 0,4684923 | METTL5   | protein_coding       |
| 0,8554227 | SSB      | protein_coding       |
| 0,620901  | NAB1     | protein_coding       |
| 0,887319  | PPIG     | protein_coding       |
| 0,4638153 | FASTKD1  | protein_coding       |
| 0,9082846 | HECW2    | protein_coding       |
| 0,9465232 | IDH1     | protein_coding       |
| 0,4521055 | OLA1     | protein_coding       |
| 0,9839612 | CIR1     | protein_coding       |
| 0,8877092 | ITPRID2  | protein_coding       |

|           |           |                |
|-----------|-----------|----------------|
| 0,0727176 | WDR12     | protein_coding |
| 0,895571  | ABI2      | protein_coding |
| 0,696332  | ITGAV     | protein_coding |
| 0,5890453 | SLC40A1   | protein_coding |
| 0,9808899 | SLC35A5   | protein_coding |
| 0,9533676 | SLC49A4   | protein_coding |
| 0,7763012 | SENP7     | protein_coding |
| 0,0465925 | COX17     | protein_coding |
| 0,7419278 | PARP9     | protein_coding |
| 0,6158337 | USP8      | protein_coding |
| 0,6925926 | SECISBP2L | protein_coding |
| 0,5647201 | TMOD3     | protein_coding |
| 0,7576959 | SPPL2A    | protein_coding |
| 0,8695843 | GLCE      | protein_coding |
| 0,7444016 | APH1B     | protein_coding |
| 0,9112805 | INTS14    | protein_coding |
| 0,1444307 | CILP      | protein_coding |
| 0,7558125 | UBL7      | protein_coding |
| 0,9021789 | ARHGAP24  | protein_coding |
| 0,7122873 | FAM13A    | protein_coding |
| 0,8653179 | HERC6     | protein_coding |
| 0,4521055 | ZGRF1     | protein_coding |
| 0,7154026 | AP1AR     | protein_coding |
| 0,4835164 | COPS4     | protein_coding |
| 0,993752  | HNRNPD    | protein_coding |
| 0,7687197 | PRKG2     | protein_coding |
| 0,5265966 | RASGEF1B  | protein_coding |
| 0,0349682 | SEC31A    | protein_coding |
| 0,9185201 | GPAT3     | protein_coding |
| 0,5943942 | FGF2      | protein_coding |
| 0,6367477 | BBS7      | protein_coding |
| 0,9854182 | KIAA1109  | protein_coding |
| 0,8575378 | RAP1GDS1  | protein_coding |
| 0,9366634 | LARP1B    | protein_coding |
| 0,7196574 | PDE5A     | protein_coding |
| 0,290302  | PRDM5     | protein_coding |
| 0,5563416 | NAAA      | protein_coding |
| 0,9954421 | NUP54     | protein_coding |
| 0,8117718 | BMP2K     | protein_coding |
| 0,933129  | G3BP2     | protein_coding |
| 0,4151093 | SEPTIN11  | protein_coding |
| 0,1154353 | FRAS1     | protein_coding |
| 0,9615223 | SCARB2    | protein_coding |
| 0,5164856 | CCNG2     | protein_coding |
| 0,9182782 | CNOT6L    | protein_coding |
| 0,8875885 | USO1      | protein_coding |
| 0,5183663 | SHROOM3   | protein_coding |
| 0,3480863 | ANXA3     | protein_coding |
| 0,4497301 | PPA2      | protein_coding |
| 0,4933085 | INTS12    | protein_coding |
| 0,0897312 | ENPEP     | protein_coding |
| 0,6811841 | HADH      | protein_coding |
| 0,1970133 | EGF       | protein_coding |
| 0,4456276 | PAPSS1    | protein_coding |
| 0,8788135 | SEC24B    | protein_coding |
| 0,8901085 | PPP3CA    | protein_coding |
| 0,1895063 | SLC39A8   | protein_coding |
| 0,0895372 | FBN2      | protein_coding |
| 0,6613295 | MAPK8IP3  | protein_coding |

|           |           |                      |
|-----------|-----------|----------------------|
| 0,9423015 | RGS3      | protein_coding       |
| 0,633922  | GUCD1     | protein_coding       |
| 0,9745853 | RNF185    | protein_coding       |
| 0,3013021 | B4GALNT3  | protein_coding       |
| 0,4954628 | ETV6      | protein_coding       |
| 0,8148845 | GABARAPL1 | protein_coding       |
| 0,4875875 | KIF21A    | protein_coding       |
| 0,9296784 | CPNE8     | protein_coding       |
| 0,654521  | FGD4      | protein_coding       |
| 0,9154352 | SINHCAF   | protein_coding       |
| 0,8640757 | AEBP2     | protein_coding       |
| 0,9997039 | ETNK1     | protein_coding       |
| 0,5677206 | ZCRB1     | protein_coding       |
| 0,7987424 | TMEM117   | protein_coding       |
| 0,0464426 | PRICKLE1  | protein_coding       |
| 0,9781971 | C1RL      | protein_coding       |
| 0,4179007 | NDUFA9    | protein_coding       |
| 0,8703454 | PEX5      | protein_coding       |
| 0,9229915 | SCAF11    | protein_coding       |
| 0,9789395 | LLPH      | protein_coding       |
| 0,8912998 | RPL14P1   | processed_pseudogene |
| 0,2778507 | LRIG3     | protein_coding       |
| 0,9894339 | GLIPR1    | protein_coding       |
| 0,1721544 | PHLDA1    | protein_coding       |
| 0,4806087 | TMEM19    | protein_coding       |
| 0,472118  | PTPRQ     | protein_coding       |
| 0,0757434 | DUSP6     | protein_coding       |
| 0,8698323 | POC1B     | protein_coding       |
| 0,9625751 | TMTC3     | protein_coding       |
| 0,1326966 | LUM       | protein_coding       |
| 0,813314  | NEDD1     | protein_coding       |
| 0,9951314 | SLC15A4   | protein_coding       |
| 0,6232447 | TDG       | protein_coding       |
| 0,6316303 | MMAB      | protein_coding       |
| 0,9168915 | GLTP      | protein_coding       |
| 0,9524609 | GIT2      | protein_coding       |
| 0,9210173 | TCHP      | protein_coding       |
| 0,7713242 | NUP58     | protein_coding       |
| 0,6757338 | MTMR6     | protein_coding       |
| 0,9112805 | SLC46A3   | protein_coding       |
| 0,6909761 | SLC7A1    | protein_coding       |
| 0,2690459 | LNX2      | protein_coding       |
| 0,8500846 | SUOX      | protein_coding       |
| 0,796666  | ACVRL1    | protein_coding       |
| 0,5245497 | SMARCC2   | protein_coding       |
| 0,3830886 | KANSL2    | protein_coding       |
| 0,9237476 | CERS5     | protein_coding       |
| 0,8185595 | CSAD      | protein_coding       |
| 0,9933219 | LMBR1L    | protein_coding       |
| 0,4957019 | ESYT1     | protein_coding       |
| 0,8099847 | TMBIM6    | protein_coding       |
| 0,7984578 | ANKRD52   | protein_coding       |
| 0,4748134 | ZNF740    | protein_coding       |
| 0,6835435 | WDFY2     | protein_coding       |
| 0,4826313 | HNRNPA1L2 | protein_coding       |
| 0,7291201 | LPAR6     | protein_coding       |
| 0,5180247 | ESD       | protein_coding       |
| 0,8386162 | RB1       | protein_coding       |
| 0,9182782 | SBNO1     | protein_coding       |

|           |         |                |
|-----------|---------|----------------|
| 0,9914435 | DENR    | protein_coding |
| 0,8619772 | RBM26   | protein_coding |
| 0,692146  | MBNL2   | protein_coding |
| 0,9450135 | ABHD13  | protein_coding |
| 0,8877092 | CUL4A   | protein_coding |
| 0,4721853 | FITM1   | protein_coding |
| 0,993752  | TMX1    | protein_coding |
| 0,7118106 | FRMD6   | protein_coding |
| 0,8966801 | PELI2   | protein_coding |
| 0,8930787 | ARMH4   | protein_coding |
| 0,998169  | SLC38A6 | protein_coding |
| 0,7929944 | NAA30   | protein_coding |
| 0,9998478 | DCAF5   | protein_coding |
| 0,349702  | RAB15   | protein_coding |
| 0,900863  | STON2   | protein_coding |
| 0,9233889 | JDP2    | protein_coding |
| 0,7892243 | FBLN5   | protein_coding |
| 0,2506935 | WARS    | protein_coding |
| 0,9524483 | WDR20   | protein_coding |
| 0,5245497 | NIPA2   | protein_coding |
| 0,9410184 | SLC12A6 | protein_coding |
| 0,9789623 | MFAP1   | protein_coding |
| 0,561634  | TCF12   | protein_coding |
| 0,9854069 | SERF2   | protein_coding |
| 0,8722977 | ZSCAN29 | protein_coding |
| 0,284683  | FGF7    | protein_coding |
| 0,998169  | BNIP2   | protein_coding |
| 0,5869872 | GTF2A2  | protein_coding |
| 0,5062136 | SRP14   | protein_coding |
| 0,8219774 | TLE3    | protein_coding |
| 0,9808899 | ANP32A  | protein_coding |
| 0,2965462 | UBE2Q2  | protein_coding |
| 0,7627705 | ETFA    | protein_coding |
| 0,8721867 | HMG20A  | protein_coding |
| 0,3880092 | SCAPER  | protein_coding |
| 0,6285359 | TSPAN3  | protein_coding |
| 0,9925374 | WDR61   | protein_coding |
| 0,903318  | NCOA2   | protein_coding |
| 0,8017097 | MAN2C1  | protein_coding |
| 0,8850531 | DNAJA4  | protein_coding |
| 0,4413743 | TLNRD1  | protein_coding |
| 0,7057791 | TPM1    | protein_coding |
| 0,887128  | IGF1R   | protein_coding |
| 0,3799704 | ARRDC4  | protein_coding |
| 0,8287149 | USP3    | protein_coding |
| 0,4089968 | BBS4    | protein_coding |
| 0,7639764 | PML     | protein_coding |
| 0,7921707 | LINS1   | protein_coding |
| 0,6098976 | ULK3    | protein_coding |
| 0,4894579 | PCSK6   | protein_coding |
| 0,8992483 | SCAMP2  | protein_coding |
| 0,8882787 | POLG    | protein_coding |
| 0,9954421 | ABHD2   | protein_coding |
| 0,9922658 | MFGE8   | protein_coding |
| 0,6800165 | UNC45A  | protein_coding |
| 0,8992483 | FURIN   | protein_coding |
| 0,8672415 | IQGAP1  | protein_coding |
| 0,9700303 | CRTC3   | protein_coding |
| 0,9157791 | EFL1    | protein_coding |

|           |          |                |
|-----------|----------|----------------|
| 0,9108751 | SEC11A   | protein_coding |
| 0,8918638 | GLYR1    | protein_coding |
| 0,8287149 | PMM2     | protein_coding |
| 0,7291201 | PARN     | protein_coding |
| 0,5879554 | FTO      | protein_coding |
| 0,4750209 | UQCRC2   | protein_coding |
| 0,1232731 | CDR2     | protein_coding |
| 0,9464798 | ARHGAP17 | protein_coding |
| 0,8147279 | MYLK3    | protein_coding |
| 0,6638064 | DHX38    | protein_coding |
| 0,5537742 | ZFHX3    | protein_coding |
| 0,5134965 | CPNE2    | protein_coding |
| 0,9666028 | NLRC5    | protein_coding |
| 0,5580971 | KIFC3    | protein_coding |
| 0,8100875 | GCSH     | protein_coding |
| 0,1284788 | CDH11    | protein_coding |
| 0,860343  | NOL3     | protein_coding |
| 0,8882787 | MAP1LC3B | protein_coding |
| 0,6951729 | MBTPS1   | protein_coding |
| 0,6615319 | CDH13    | protein_coding |
| 0,4599964 | ZCCHC14  | protein_coding |
| 0,3765746 | RPL3L    | protein_coding |
| 0,8919058 | RPS2     | protein_coding |
| 0,146655  | NDUFB10  | protein_coding |
| 0,9366634 | PDPK1    | protein_coding |
| 0,9618453 | DEF8     | protein_coding |
| 0,615864  | TCF25    | protein_coding |
| 0,3607643 | MED9     | protein_coding |
| 0,9481776 | NCOR1    | protein_coding |
| 0,2190274 | COPS3    | protein_coding |
| 0,9625751 | GID4     | protein_coding |
| 0,8545769 | ZNF287   | protein_coding |
| 0,9142106 | MYOCD    | protein_coding |
| 0,8457624 | UTP4     | protein_coding |
| 0,3435112 | RANBP10  | protein_coding |
| 0,9165105 | PRPSAP2  | protein_coding |
| 0,9638699 | UNC45B   | protein_coding |
| 0,8500846 | PCTP     | protein_coding |
| 0,8992483 | TOM1L1   | protein_coding |
| 0,8882787 | C17orf80 | protein_coding |
| 0,3244086 | TOB1     | protein_coding |
| 0,9484395 | VPS53    | protein_coding |
| 0,6613817 | SGSM2    | protein_coding |
| 0,9476644 | NPEPPS   | protein_coding |
| 0,6390934 | SCRN2    | protein_coding |
| 0,4750209 | SSH2     | protein_coding |
| 0,5365997 | ABCA8    | protein_coding |
| 0,9450135 | CLTC     | protein_coding |
| 0,621558  | BCAS3    | protein_coding |
| 0,1799031 | PTRH2    | protein_coding |
| 0,9998538 | SS18     | protein_coding |
| 0,9925374 | AFG3L2   | protein_coding |
| 0,9894339 | SLC39A6  | protein_coding |
| 0,4835164 | RPRD1A   | protein_coding |
| 0,9533676 | GALNT1   | protein_coding |
| 0,8309028 | ASXL3    | protein_coding |
| 0,7242009 | GAREM1   | protein_coding |
| 0,7118106 | ESCO1    | protein_coding |
| 0,2098554 | OSBPL1A  | protein_coding |

|           |           |                |
|-----------|-----------|----------------|
| 0,3814605 | GATA6     | protein_coding |
| 0,5456715 | GREB1L    | protein_coding |
| 0,9544158 | RMC1      | protein_coding |
| 0,8992483 | NPC1      | protein_coding |
| 0,9792506 | SLC14A1   | protein_coding |
| 0,7125689 | ARRB2     | protein_coding |
| 0,8130747 | MINK1     | protein_coding |
| 0,5042626 | SAT2      | protein_coding |
| 0,6433147 | TTYH2     | protein_coding |
| 0,9997554 | EIF4A3    | protein_coding |
| 0,9251589 | CSNK1D    | protein_coding |
| 0,7118106 | ANAPC11   | protein_coding |
| 0,8885864 | TBCD      | protein_coding |
| 0,4954628 | NARF      | protein_coding |
| 0,7321942 | RPTOR     | protein_coding |
| 0,6574161 | FOKK2     | protein_coding |
| 0,921365  | WDR45B    | protein_coding |
| 0,9367129 | DYM       | protein_coding |
| 0,7972313 | MAPK4     | protein_coding |
| 0,6305527 | MBD1      | protein_coding |
| 0,7214394 | SMAD4     | protein_coding |
| 0,7291201 | ZCCHC2    | protein_coding |
| 0,401929  | RETREG3   | protein_coding |
| 0,8647372 | ERBB2     | protein_coding |
| 0,6128477 | IGFBP4    | protein_coding |
| 0,3466656 | FKBP10    | protein_coding |
| 0,4732706 | TXNL4A    | protein_coding |
| 0,9356716 | BRD4      | protein_coding |
| 0,9840915 | NFIC      | protein_coding |
| 0,633922  | PFKL      | protein_coding |
| 0,9081173 | DPP9      | protein_coding |
| 0,5985056 | ZFP14     | protein_coding |
| 0,5420087 | SIRT3     | protein_coding |
| 0,7972313 | IFITM3    | protein_coding |
| 0,7673893 | COL6A1    | protein_coding |
| 0,7104968 | IFNAR1    | protein_coding |
| 0,3030424 | SOD1      | protein_coding |
| 0,9178514 | COL6A2    | protein_coding |
| 0,0941174 | SIK1      | protein_coding |
| 0,8670918 | SCYL1     | protein_coding |
| 0,3660091 | TMEM50B   | protein_coding |
| 0,7929944 | APP       | protein_coding |
| 0,9169269 | DOP1B     | protein_coding |
| 0,6613295 | URB1      | protein_coding |
| 0,8575378 | AKT1      | protein_coding |
| 0,4845515 | EMP3      | protein_coding |
| 0,8670918 | SAE1      | protein_coding |
| 0,9709611 | RNPEPL1   | protein_coding |
| 0,32001   | PSMB6     | protein_coding |
| 0,7910551 | RPS11     | protein_coding |
| 0,6662006 | RPL13A    | protein_coding |
| 0,9900815 | ZNF614    | protein_coding |
| 0,887319  | RERE      | protein_coding |
| 0,6985177 | PGD       | protein_coding |
| 0,9804708 | MYOM3     | protein_coding |
| 0,9248086 | RPL11     | protein_coding |
| 0,9636851 | C1orf216  | protein_coding |
| 0,9670362 | KIAA0319L | protein_coding |
| 0,4799252 | MAP3K6    | protein_coding |

|           |           |                |
|-----------|-----------|----------------|
| 0,8100875 | GPN2      | protein_coding |
| 0,8255851 | WDTC1     | protein_coding |
| 0,4835164 | HSPG2     | protein_coding |
| 0,3930297 | ITGB3BP   | protein_coding |
| 0,9619323 | SERBP1    | protein_coding |
| 0,8992483 | BCL10     | protein_coding |
| 0,7558125 | CCN1      | protein_coding |
| 0,9512671 | PRKACB    | protein_coding |
| 0,4583602 | PIGK      | protein_coding |
| 0,3697716 | TINAGL1   | protein_coding |
| 0,721162  | RPS8      | protein_coding |
| 0,4848227 | PTPRF     | protein_coding |
| 0,9977992 | MOB3C     | protein_coding |
| 0,7252511 | LMO4      | protein_coding |
| 0,9998538 | MTF2      | protein_coding |
| 0,6591549 | IGSF3     | protein_coding |
| 0,3212727 | ZNF697    | protein_coding |
| 0,9802452 | CTTNBP2NL | protein_coding |
| 0,8500846 | STRIP1    | protein_coding |
| 0,5911872 | PSMA5     | protein_coding |
| 0,7166966 | CD53      | protein_coding |
| 0,887128  | CELSR2    | protein_coding |
| 0,855954  | GPR161    | protein_coding |
| 0,4894579 | ALDH9A1   | protein_coding |
| 0,2337466 | ATP1B1    | protein_coding |
| 0,8303367 | TIPRL     | protein_coding |
| 0,9168619 | POGK      | protein_coding |
| 0,2318378 | MPC2      | protein_coding |
| 0,7942035 | CREG1     | protein_coding |
| 0,5622598 | DCAF6     | protein_coding |
| 0,7687197 | TMCO1     | protein_coding |
| 0,9171648 | POU2F1    | protein_coding |
| 0,5267449 | ILDR2     | protein_coding |
| 0,0959391 | DPT       | protein_coding |
| 0,8166471 | MGST3     | protein_coding |
| 0,9428271 | COP1      | protein_coding |
| 0,8969303 | UFC1      | protein_coding |
| 0,4806087 | FCGR2A    | protein_coding |
| 0,4954628 | RGS5      | protein_coding |
| 0,5622214 | SDHC      | protein_coding |
| 0,7740102 | PRCC      | protein_coding |
| 0,4835164 | MRPL24    | protein_coding |
| 0,9316489 | PIGM      | protein_coding |
| 0,4793848 | CASQ1     | protein_coding |
| 0,5397488 | HDGF      | protein_coding |
| 0,9792506 | ABL2      | protein_coding |
| 0,4835164 | XPR1      | protein_coding |
| 0,2908312 | TOR1AIP1  | protein_coding |
| 0,4911389 | HMCN1     | protein_coding |
| 0,9652509 | RGL1      | protein_coding |
| 0,9906886 | LYPLAL1   | protein_coding |
| 0,8594992 | PRUNE1    | protein_coding |
| 0,9127443 | ECM1      | protein_coding |
| 0,9406097 | TARS2     | protein_coding |
| 0,8672415 | SNX27     | protein_coding |
| 0,9496064 | SETDB1    | protein_coding |
| 0,2104415 | ADAMTSL4  | protein_coding |
| 0,4688629 | MCL1      | protein_coding |
| 0,492696  | CTSK      | protein_coding |



|           |          |                                    |
|-----------|----------|------------------------------------|
| 0,8976077 | RFX5     | protein_coding                     |
| 0,7213265 | PI4KB    | protein_coding                     |
| 0,8500846 | PIP5K1A  | protein_coding                     |
| 0,8930787 | ANP32E   | protein_coding                     |
| 0,6970327 | MINDY1   | protein_coding                     |
| 0,9477707 | SELENBP1 | protein_coding                     |
| 0,6624016 | CERS2    | protein_coding                     |
| 0,9907221 | ENSA     | protein_coding                     |
| 0,9312186 | LSP1P4   | transcribed_unprocessed_pseudogene |
| 0,9358987 | SEMA6C   | protein_coding                     |
| 0,7740102 | MRPL9    | protein_coding                     |
| 0,6903585 | ARNT     | protein_coding                     |
| 0,5341139 | POGZ     | protein_coding                     |
| 0,6476315 | GOLPH3L  | protein_coding                     |
| 0,3953915 | GABPB2   | protein_coding                     |
| 0,9583287 | DYRK3    | protein_coding                     |
| 0,4593782 | EIF2D    | protein_coding                     |
| 0,4954483 | INTS7    | protein_coding                     |
| 0,0088417 | SMYD2    | protein_coding                     |
| 0,9481776 | TP53BP2  | protein_coding                     |
| 0,4765978 | ATP8B2   | protein_coding                     |
| 0,5501237 | ADAM15   | protein_coding                     |
| 0,9840915 | JTB      | protein_coding                     |
| 0,645515  | S100A8   | protein_coding                     |
| 0,5557127 | TPM3     | protein_coding                     |
| 0,613355  | SNAPIN   | protein_coding                     |
| 0,8922683 | UBAP2L   | protein_coding                     |
| 0,3113413 | HAX1     | protein_coding                     |
| 0,1767096 | C1orf43  | protein_coding                     |
| 0,8076343 | GATAD2B  | protein_coding                     |
| 0,9998478 | ILF2     | protein_coding                     |
| 0,8219707 | RIT1     | protein_coding                     |
| 0,5140003 | INTS3    | protein_coding                     |
| 0,9682998 | ACTA1    | protein_coding                     |
| 0,5360859 | GALNT2   | protein_coding                     |
| 0,9378831 | TTC13    | protein_coding                     |
| 0,8545769 | SCCPDH   | protein_coding                     |
| 0,7681066 | LYST     | protein_coding                     |
| 0,8019639 | CEP170   | protein_coding                     |
| 0,7763012 | ACP1     | protein_coding                     |
| 0,5164856 | SNAP47   | protein_coding                     |
| 0,5625279 | SRP9     | protein_coding                     |
| 0,9893136 | NVL      | protein_coding                     |
| 0,9967216 | SDE2     | protein_coding                     |
| 0,8160828 | DEGS1    | protein_coding                     |
| 0,9700303 | FBXO28   | protein_coding                     |
| 0,8500846 | ARF1     | protein_coding                     |
| 0,8512635 | CNIH4    | protein_coding                     |
| 0,7435926 | ITPKB    | protein_coding                     |
| 0,8118149 | GUK1     | protein_coding                     |
| 0,5558351 | CDC42BPA | protein_coding                     |
| 0,9411338 | MBOAT2   | protein_coding                     |
| 0,9917279 | PARP1    | protein_coding                     |
| 0,806905  | PSEN2    | protein_coding                     |
| 0,9954421 | PYCR2    | protein_coding                     |
| 0,8500846 | LBR      | protein_coding                     |
| 0,9345529 | EPHX1    | protein_coding                     |
| 0,6676442 | PPFIA4   | protein_coding                     |
| 0,0731855 | PLEKHA6  | protein_coding                     |

|           |          |                |
|-----------|----------|----------------|
| 0,9994264 | ARL8A    | protein_coding |
| 0,0286685 | OSR1     | protein_coding |
| 0,9142507 | PDIA6    | protein_coding |
| 0,6676251 | RHOB     | protein_coding |
| 0,806905  | HNRNPPL  | protein_coding |
| 0,8381234 | GALM     | protein_coding |
| 0,7444016 | EML4     | protein_coding |
| 0,6475905 | CALM2    | protein_coding |
| 0,7628544 | RPS27A   | protein_coding |
| 0,6473313 | WDPCP    | protein_coding |
| 0,9479329 | VPS54    | protein_coding |
| 0,7436469 | ASXL2    | protein_coding |
| 0,9356153 | ETAA1    | protein_coding |
| 0,4195381 | SNRPG    | protein_coding |
| 0,0796818 | MEIS1    | protein_coding |
| 0,9781971 | CIAO1    | protein_coding |
| 0,4835164 | ZNF514   | protein_coding |
| 0,7010516 | SNRNP200 | protein_coding |
| 0,1149889 | MRPS5    | protein_coding |
| 0,2164941 | TPRKB    | protein_coding |
| 0,8117718 | EXOC6B   | protein_coding |
| 0,8992483 | TEX261   | protein_coding |
| 0,9074092 | DUSP11   | protein_coding |
| 0,9572126 | NPHP1    | protein_coding |
| 0,4409169 | MALL     | protein_coding |
| 0,7081667 | THNSL2   | protein_coding |
| 0,7842247 | RALB     | protein_coding |
| 0,3883821 | SLC20A1  | protein_coding |
| 0,9536474 | ZC3H8    | protein_coding |
| 0,8229361 | FAHD2B   | protein_coding |
| 0,9925374 | AFF3     | protein_coding |
| 0,9967216 | UBXN4    | protein_coding |
| 0,9794449 | SPOPL    | protein_coding |
| 0,8578793 | POLR2D   | protein_coding |
| 0,7440219 | AMMECR1L | protein_coding |
| 0,8885864 | PKP4     | protein_coding |
| 0,7072223 | SCRN3    | protein_coding |
| 0,6044343 | LNPK     | protein_coding |
| 0,0941174 | ZNF385B  | protein_coding |
| 0,6776989 | UBR3     | protein_coding |
| 0,6947291 | GULP1    | protein_coding |
| 0,6766513 | FAM171B  | protein_coding |
| 0,784306  | HSPD1    | protein_coding |
| 0,8992483 | NBEAL1   | protein_coding |
| 0,9768456 | KANSL1L  | protein_coding |
| 0,9975676 | SPAG16   | protein_coding |
| 0,6076071 | SUMF1    | protein_coding |
| 0,8189129 | RHBDD1   | protein_coding |
| 0,2231549 | ACKR3    | protein_coding |
| 0,9933219 | COPS7B   | protein_coding |
| 0,9734904 | DIS3L2   | protein_coding |
| 0,2551699 | VGLL4    | protein_coding |
| 0,993752  | RAB5A    | protein_coding |
| 0,3680294 | RETREG2  | protein_coding |
| 0,7154026 | CTDSP1   | protein_coding |
| 0,7968733 | CNOT9    | protein_coding |
| 0,4835164 | GRIP2    | protein_coding |
| 0,6254273 | EAF1     | protein_coding |
| 0,6137496 | DYNC1LI1 | protein_coding |

|           |          |                |
|-----------|----------|----------------|
| 0,3049645 | RBMS3    | protein_coding |
| 0,1622398 | CSRNP1   | protein_coding |
| 0,9954421 | SLC25A38 | protein_coding |
| 0,8833312 | ITGA9    | protein_coding |
| 0,887128  | GOLGA4   | protein_coding |
| 0,5209123 | CTDSPL   | protein_coding |
| 0,9865636 | IQSEC1   | protein_coding |
| 0,9484395 | CAND2    | protein_coding |
| 0,9127443 | RPL32    | protein_coding |
| 0,2046145 | PTPRG    | protein_coding |
| 0,9057527 | IL17RD   | protein_coding |
| 0,5622112 | SHQ1     | protein_coding |
| 0,0286685 | SLC25A26 | protein_coding |
| 0,445647  | UBA3     | protein_coding |
| 0,5265966 | ARL6IP5  | protein_coding |
| 0,624851  | TMF1     | protein_coding |
| 0,8545115 | LRIG1    | protein_coding |
| 0,7558125 | LIMD1    | protein_coding |
| 0,997931  | ZNF660   | protein_coding |
| 0,6527079 | NFKBIZ   | protein_coding |
| 0,0286685 | COL8A1   | protein_coding |
| 0,7149564 | NXPE3    | protein_coding |
| 0,3126419 | PHLDB2   | protein_coding |
| 0,841477  | ABHD10   | protein_coding |
| 0,943695  | RABL3    | protein_coding |
| 0,7558125 | ATG3     | protein_coding |
| 0,981857  | BOC      | protein_coding |
| 0,9424246 | SRPRB    | protein_coding |
| 0,7013708 | EIF2A    | protein_coding |
| 0,9540553 | ALDH1L1  | protein_coding |
| 0,4593782 | OSBPL11  | protein_coding |
| 0,8118149 | TRPC1    | protein_coding |
| 0,472118  | NCEH1    | protein_coding |
| 0,935463  | LPP      | protein_coding |
| 0,4919121 | TCTA     | protein_coding |
| 0,9997039 | DCAF1    | protein_coding |
| 0,6906735 | MANF     | protein_coding |
| 0,3881918 | SLIT2    | protein_coding |
| 0,7698372 | EIF2B5   | protein_coding |
| 0,8721867 | FIP1L1   | protein_coding |
| 0,5773893 | LYAR     | protein_coding |
| 0,7816527 | CENPC    | protein_coding |
| 0,922549  | CORIN    | protein_coding |
| 0,3087684 | ATP10D   | protein_coding |
| 0,9484259 | ENOPH1   | protein_coding |
| 0,962885  | KLHL8    | protein_coding |
| 0,8553175 | PYURF    | protein_coding |
| 0,6383874 | TBCK     | protein_coding |
| 0,9670595 | CAMK2D   | protein_coding |
| 0,6254273 | CISD2    | protein_coding |
| 0,8801593 | ANK2     | protein_coding |
| 0,9081173 | TIFA     | protein_coding |
| 0,9792506 | SPATA5   | protein_coding |
| 0,9998478 | METTTL14 | protein_coding |
| 0,8158016 | USP53    | protein_coding |
| 0,2190274 | SETD7    | protein_coding |
| 0,6116816 | NAF1     | protein_coding |
| 0,7905225 | MARCH1   | protein_coding |
| 0,7230802 | RPS3A    | protein_coding |

|           |          |                |
|-----------|----------|----------------|
| 0,2308926 | PDGFC    | protein_coding |
| 0,4740961 | CBR4     | protein_coding |
| 0,8492407 | CYP4V2   | protein_coding |
| 0,3126419 | NDUFS6   | protein_coding |
| 0,7968733 | MARCH6   | protein_coding |
| 0,6753466 | MYO10    | protein_coding |
| 0,7740102 | RPL37    | protein_coding |
| 0,284683  | OSMR     | protein_coding |
| 0,5641983 | PLK2     | protein_coding |
| 0,9700639 | PIK3R1   | protein_coding |
| 0,998169  | LHFPL2   | protein_coding |
| 0,5455384 | SSBP2    | protein_coding |
| 0,5511615 | IQGAP2   | protein_coding |
| 0,9552698 | RASA1    | protein_coding |
| 0,5567171 | GIN1     | protein_coding |
| 0,6662301 | PPIP5K2  | protein_coding |
| 0,8682799 | PAM      | protein_coding |
| 0,9112805 | BDP1     | protein_coding |
| 0,9368504 | GTF2H2   | protein_coding |
| 0,4750209 | SLC30A5  | protein_coding |
| 0,9408651 | BTF3     | protein_coding |
| 0,6818653 | FBXL17   | protein_coding |
| 0,601474  | FEM1C    | protein_coding |
| 0,5265966 | COMMD10  | protein_coding |
| 0,8698319 | ATG12    | protein_coding |
| 0,8847715 | YIPF5    | protein_coding |
| 0,4165098 | ARHGAP26 | protein_coding |
| 0,7357059 | DDX46    | protein_coding |
| 0,9543278 | RNF145   | protein_coding |
| 0,6613295 | FBXO38   | protein_coding |
| 0,4593782 | TNIP1    | protein_coding |
| 0,7738482 | G3BP1    | protein_coding |
| 0,7733348 | RMND5B   | protein_coding |
| 0,993752  | BOD1     | protein_coding |
| 0,4519396 | TENM2    | protein_coding |
| 0,0941174 | TBC1D7   | protein_coding |
| 0,1974243 | FARS2    | protein_coding |
| 0,1712026 | GFOD1    | protein_coding |
| 0,6053653 | CDKAL1   | protein_coding |
| 0,817424  | LRRTM2   | protein_coding |
| 0,8163405 | ZMAT2    | protein_coding |
| 0,3648373 | KLHL3    | protein_coding |
| 0,5641983 | HIGD2A   | protein_coding |
| 0,9810626 | FAM193B  | protein_coding |
| 0,6873469 | TNFRSF21 | protein_coding |
| 0,5544626 | MMUT     | protein_coding |
| 0,8463447 | PPP1R18  | protein_coding |
| 0,8117718 | DAAM2    | protein_coding |
| 0,5511615 | MLIP     | protein_coding |
| 0,6543081 | RPL7L1   | protein_coding |
| 0,8930787 | IRAK1BP1 | protein_coding |
| 0,979961  | PHIP     | protein_coding |
| 0,9700303 | MMS22L   | protein_coding |
| 0,5848767 | PNRC1    | protein_coding |
| 0,9833697 | PM20D2   | protein_coding |
| 0,9997554 | RARS2    | protein_coding |
| 0,8189129 | TBC1D32  | protein_coding |
| 0,7816372 | RNF217   | protein_coding |
| 0,5710875 | ARHGAP18 | protein_coding |

|           |          |                                    |
|-----------|----------|------------------------------------|
| 0,7907944 | SLC2A12  | protein_coding                     |
| 0,7823793 | SHPRH    | protein_coding                     |
| 0,7214887 | AIG1     | protein_coding                     |
| 0,6604792 | DYNLT1   | protein_coding                     |
| 0,7081667 | TIAM2    | protein_coding                     |
| 0,8786615 | TMEM181  | protein_coding                     |
| 0,9169269 | WTAP     | protein_coding                     |
| 0,2778507 | ZMYM4    | protein_coding                     |
| 0,6104614 | ARMT1    | protein_coding                     |
| 0,4600881 | VWDE     | protein_coding                     |
| 0,8062191 | GNA12    | protein_coding                     |
| 0,8619772 | WASH2P   | transcribed_unprocessed_pseudogene |
| 0,8786805 | CCZ1B    | protein_coding                     |
| 0,8847715 | RBAK     | protein_coding                     |
| 0,887128  | CREB5    | protein_coding                     |
| 0,5347705 | EGFR     | protein_coding                     |
| 0,146655  | IGFBP3   | protein_coding                     |
| 0,6468834 | PURB     | protein_coding                     |
| 0,3459301 | MDH2     | protein_coding                     |
| 0,5998801 | NIPSNAP2 | protein_coding                     |
| 0,5920116 | CCT6A    | protein_coding                     |
| 0,9828271 | ZNF92    | protein_coding                     |
| 0,8212084 | TMEM168  | protein_coding                     |
| 0,7135515 | ASB15    | protein_coding                     |
| 0,4413743 | GIGYF1   | protein_coding                     |
| 0,2410408 | TRIM4    | protein_coding                     |
| 0,3150284 | MEPCE    | protein_coding                     |
| 0,6225102 | TMEM209  | protein_coding                     |
| 0,2681506 | TMEM140  | protein_coding                     |
| 0,3814605 | TLK2     | protein_coding                     |
| 0,8698319 | NOM1     | protein_coding                     |
| 0,8582779 | LUC7L2   | protein_coding                     |
| 0,8915993 | DENND2A  | protein_coding                     |
| 0,1140347 | SH3KBP1  | protein_coding                     |
| 0,4307688 | TMEM47   | protein_coding                     |
| 0,2966679 | CASK     | protein_coding                     |
| 0,9411751 | KDM6A    | protein_coding                     |
| 0,6785825 | MSN      | protein_coding                     |
| 0,8997937 | HDAC8    | protein_coding                     |
| 0,3951339 | SLC16A2  | protein_coding                     |
| 0,1149889 | DIPK2B   | protein_coding                     |
| 0,8238032 | KRBOX4   | protein_coding                     |
| 0,2354584 | NDUFB11  | protein_coding                     |
| 0,7477503 | ZNF41    | protein_coding                     |
| 0,4318183 | ZMYM3    | protein_coding                     |
| 0,5269672 | TAF1     | protein_coding                     |
| 0,6140495 | NONO     | protein_coding                     |
| 0,4157638 | OGT      | protein_coding                     |
| 0,8992483 | SNX12    | protein_coding                     |
| 0,1890424 | ITGB1BP2 | protein_coding                     |
| 0,9951314 | ZNF711   | protein_coding                     |
| 0,9670595 | DIAPH2   | protein_coding                     |
| 0,8472938 | PRPS1    | protein_coding                     |
| 0,8289129 | DOCK11   | protein_coding                     |
| 0,7136494 | RBMX     | protein_coding                     |
| 0,7362379 | MCPH1    | protein_coding                     |
| 0,4151093 | MFHAS1   | protein_coding                     |
| 0,7816527 | FBXO25   | protein_coding                     |
| 0,9194718 | CETN2    | protein_coding                     |

|           |            |                |
|-----------|------------|----------------|
| 0,4324321 | RPL10      | protein_coding |
| 0,9666028 | CSGALNACT1 | protein_coding |
| 0,6673583 | ATP6V1B2   | protein_coding |
| 0,628921  | CCDC25     | protein_coding |
| 0,8626487 | HMBOX1     | protein_coding |
| 0,7948949 | SLC25A37   | protein_coding |
| 0,7087026 | CHMP7      | protein_coding |
| 0,7114715 | DOCK5      | protein_coding |
| 0,5780824 | PLPBP      | protein_coding |
| 0,5869808 | ERLIN2     | protein_coding |
| 0,8575378 | PXDNL      | protein_coding |
| 0,8301309 | TACC1      | protein_coding |
| 0,7530415 | PLPP5      | protein_coding |
| 0,613355  | NSD3       | protein_coding |
| 0,8189129 | TRIM55     | protein_coding |
| 0,6785825 | LACTB2     | protein_coding |
| 0,9465232 | TERF1      | protein_coding |
| 0,993752  | RPL7       | protein_coding |
| 0,8813224 | MTDH       | protein_coding |
| 0,5265966 | LRP12      | protein_coding |
| 0,6600808 | EBAG9      | protein_coding |
| 0,554581  | POLR2K     | protein_coding |
| 0,943695  | EIF3H      | protein_coding |
| 0,9900663 | UTP23      | protein_coding |
| 0,0757434 | NDUFB9     | protein_coding |
| 0,6835435 | TATDN1     | protein_coding |
| 0,9377639 | ZNF7       | protein_coding |
| 0,5046858 | VLDLR      | protein_coding |
| 0,6053653 | AK3        | protein_coding |
| 0,9745853 | UHRF2      | protein_coding |
| 0,9406097 | NFIB       | protein_coding |
| 0,7558125 | PLIN2      | protein_coding |
| 0,969384  | HAUS6      | protein_coding |
| 0,5623252 | C9orf72    | protein_coding |
| 0,6988495 | ZCCHC7     | protein_coding |
| 0,4246004 | CBWD5      | protein_coding |
| 0,578003  | CEP78      | protein_coding |
| 0,9982092 | NTRK2      | protein_coding |
| 0,7213265 | AUH        | protein_coding |
| 0,7558125 | MFSD14B    | protein_coding |
| 0,645515  | AOPEP      | protein_coding |
| 0,7114949 | ZNF462     | protein_coding |
| 0,9781148 | INIP       | protein_coding |
| 0,4887663 | UGCG       | protein_coding |
| 0,3803906 | SNX30      | protein_coding |
| 0,2073391 | STOM       | protein_coding |
| 0,5688668 | GSN        | protein_coding |
| 0,512885  | MRRF       | protein_coding |
| 0,6828036 | ALAD       | protein_coding |
| 0,5402971 | POLE3      | protein_coding |
| 0,7010516 | SURF4      | protein_coding |
| 0,3466656 | SURF1      | protein_coding |
| 0,9334172 | SURF6      | protein_coding |
| 0,8847715 | MED22      | protein_coding |
| 0,5723744 | RPL7A      | protein_coding |
| 0,5347705 | GTF3C5     | protein_coding |
| 0,4477996 | PTGES2     | protein_coding |
| 0,8375248 | CIZ1       | protein_coding |
| 0,645515  | SLC25A25   | protein_coding |

|           |          |                |
|-----------|----------|----------------|
| 0,7836389 | SH3GLB2  | protein_coding |
| 0,8721867 | MIGA2    | protein_coding |
| 0,5140003 | GPR107   | protein_coding |
| 0,7213265 | SEC16A   | protein_coding |
| 0,8661642 | DPH7     | protein_coding |
| 0,5358437 | NOTCH1   | protein_coding |
| 0,7542355 | NACC2    | protein_coding |
| 0,6676251 | USP6NL   | protein_coding |
| 0,4521055 | COMMD3   | protein_coding |
| 0,5647201 | MSRB2    | protein_coding |
| 0,9406097 | FAM171A1 | protein_coding |
| 0,849909  | MINDY3   | protein_coding |
| 0,7318327 | RSU1     | protein_coding |
| 0,3640941 | ST8SIA6  | protein_coding |
| 0,9233889 | PARD3    | protein_coding |
| 0,9352317 | ZEB1     | protein_coding |
| 0,9865636 | NRBF2    | protein_coding |
| 0,9738194 | POLR3A   | protein_coding |
| 0,860343  | HERC4    | protein_coding |
| 0,0088417 | LRMDA    | protein_coding |
| 0,86551   | CAMK2G   | protein_coding |
| 0,8846329 | GLUD1    | protein_coding |
| 0,8992483 | ANKRD1   | protein_coding |
| 0,5415117 | RPP30    | protein_coding |
| 0,6890498 | FRA10AC1 | protein_coding |
| 0,7126808 | ADD3     | protein_coding |
| 0,9946475 | DNAJB12  | protein_coding |
| 0,2819431 | EIF4EBP2 | protein_coding |
| 0,5245497 | TCF7L2   | protein_coding |
| 0,9334172 | GSTO1    | protein_coding |
| 0,5891921 | PPRC1    | protein_coding |
| 0,9802452 | ITPRIP   | protein_coding |
| 0,2945575 | CNNM2    | protein_coding |
| 0,8839518 | PDCD11   | protein_coding |
| 0,9491167 | BTBD10   | protein_coding |
| 0,1119378 | ADM      | protein_coding |
| 0,7942035 | LIN7C    | protein_coding |
| 0,5686994 | HSD17B12 | protein_coding |
| 0,2061005 | APIP     | protein_coding |
| 0,9245441 | PAMR1    | protein_coding |
| 0,7558125 | DGKZ     | protein_coding |
| 0,7561341 | EIF3M    | protein_coding |
| 0,8930787 | TNKS1BP1 | protein_coding |
| 0,7444016 | SERPING1 | protein_coding |
| 0,9221401 | SSRP1    | protein_coding |
| 0,5675917 | PTPRJ    | protein_coding |
| 0,621682  | ARFGAP2  | protein_coding |
| 0,7500896 | CELF1    | protein_coding |
| 0,3787575 | HIKESHI  | protein_coding |
| 0,3459301 | SESN3    | protein_coding |
| 0,5164856 | ENDOD1   | protein_coding |
| 0,6867028 | CCDC82   | protein_coding |
| 0,9387004 | SERPINH1 | protein_coding |
| 0,7490465 | INTS4    | protein_coding |
| 0,8745367 | PAK1     | protein_coding |
| 0,6383874 | RPS3     | protein_coding |
| 0,7558125 | ZC3H12C  | protein_coding |
| 0,7359516 | TTC12    | protein_coding |
| 0,9997651 | NCAM1    | protein_coding |

|           |          |                |
|-----------|----------|----------------|
| 0,9463928 | NPAT     | protein_coding |
| 0,9169269 | ATM      | protein_coding |
| 0,8221205 | AASDHPPT | protein_coding |
| 0,6719615 | SLX4IP   | protein_coding |
| 0,8921625 | LAMTOR1  | protein_coding |
| 0,6961817 | HYOU1    | protein_coding |
| 0,7885692 | KAT14    | protein_coding |
| 0,9928407 | MTA2     | protein_coding |
| 0,9054206 | TMEM138  | protein_coding |
| 0,5557127 | FADS1    | protein_coding |
| 0,8578793 | EML3     | protein_coding |
| 0,8500846 | CPSF7    | protein_coding |
| 0,1712026 | EI24     | protein_coding |
| 0,9406097 | FEZ1     | protein_coding |
| 0,4464427 | ESAM     | protein_coding |
| 0,7558125 | MPZL2    | protein_coding |
| 0,9781971 | SIDT2    | protein_coding |
| 0,6999614 | TAGLN    | protein_coding |
| 0,771306  | JPH2     | protein_coding |
| 0,3150284 | COMMD7   | protein_coding |
| 0,9377639 | SOGA1    | protein_coding |
| 0,983457  | LSM14B   | protein_coding |
| 0,9702772 | YTHDF1   | protein_coding |
| 0,3792977 | TRPT1    | protein_coding |
| 0,8268614 | MRPL49   | protein_coding |
| 0,5777334 | FAU      | protein_coding |
| 0,2318378 | TM7SF2   | protein_coding |
| 0,4894579 | VPS51    | protein_coding |
| 0,621558  | TAOK2    | protein_coding |
| 0,8330359 | TMEM219  | protein_coding |
| 0,7571978 | MPP7     | protein_coding |
| 0,8189129 | ITGB1    | protein_coding |
| 0,330331  | CWC15    | protein_coding |
| 0,8498626 | ARID5B   | protein_coding |
| 0,8447416 | DCUN1D2  | protein_coding |
| 0,0132445 | TMCO3    | protein_coding |
| 0,6184746 | LATS2    | protein_coding |
| 0,7518452 | SAP18    | protein_coding |
| 0,7431559 | ADGRL3   | protein_coding |
| 0,654521  | KIAA1328 | protein_coding |
| 0,933129  | MIA2     | protein_coding |
| 0,5111636 | HNMT     | protein_coding |
| 0,3830886 | PDCD4    | protein_coding |
| 0,7238093 | DLG2     | protein_coding |
| 0,1738303 | PRSS23   | protein_coding |
| 0,3943278 | MTMR12   | protein_coding |
| 0,7611529 | PPP1R1C  | protein_coding |
| 0,3019122 | CCT5     | protein_coding |
| 0,5187247 | ATPCKMT  | protein_coding |
| 0,1692705 | DOCK1    | protein_coding |
| 0,2190274 | DIXDC1   | protein_coding |
| 0,3514523 | DLAT     | protein_coding |
| 0,4498511 | NKAPD1   | protein_coding |
| 0,4151093 | TIMM8B   | protein_coding |
| 0,654521  | PTS      | protein_coding |
| 0,5688668 | PIP4K2A  | protein_coding |
| 0,9660874 | FOXO1    | protein_coding |
| 0,2506935 | CRIM1    | protein_coding |
| 0,7987424 | SEC24D   | protein_coding |



|           |          |                |
|-----------|----------|----------------|
| 0,7010516 | UBC      | protein_coding |
| 0,9408651 | ITPR1    | protein_coding |
| 0,8330359 | DCP1B    | protein_coding |
| 0,8992483 | CACNA1C  | protein_coding |
| 0,6249095 | THRB     | protein_coding |
| 0,3194617 | NGLY1    | protein_coding |
| 0,330331  | OXSM     | protein_coding |
| 0,579213  | UEVLD    | protein_coding |
| 0,7352523 | C12orf45 | protein_coding |
| 0,7057791 | TMEM263  | protein_coding |
| 0,9463209 | UBE3B    | protein_coding |
| 0,290432  | ANK3     | protein_coding |
| 0,9745679 | IPMK     | protein_coding |
| 0,9312186 | PLBD2    | protein_coding |
| 0,5998801 | DLG5     | protein_coding |
| 0,9808899 | SLC2A13  | protein_coding |
| 0,5776471 | GXYLT1   | protein_coding |
| 0,9738194 | TWF1     | protein_coding |
| 0,9738194 | DIP2C    | protein_coding |
| 0,7805908 | EIF4E    | protein_coding |
| 0,654521  | MAGI1    | protein_coding |
| 0,5412806 | CSNK1G3  | protein_coding |
| 0,9771336 | SRFBP1   | protein_coding |
| 0,9754097 | AKAP6    | protein_coding |
| 0,435547  | FAM177A1 | protein_coding |
| 0,7972313 | MBIP     | protein_coding |
| 0,7910551 | MIPOL1   | protein_coding |
| 0,8373584 | EXT2     | protein_coding |
| 0,6305527 | TMEM18   | protein_coding |
| 0,2073391 | NDUFC2   | protein_coding |
| 0,5707477 | ME3      | protein_coding |
| 0,9977992 | NUBPL    | protein_coding |
| 0,7791166 | NEK7     | protein_coding |
| 0,8831297 | FER      | protein_coding |
| 0,855954  | VIPAS39  | protein_coding |
| 0,2394158 | ANKRD50  | protein_coding |
| 0,9998478 | UPF2     | protein_coding |
| 0,4887663 | CDC123   | protein_coding |
| 0,799134  | SCLT1    | protein_coding |
| 0,5964345 | CCDC3    | protein_coding |
| 0,9954421 | FRMD4A   | protein_coding |
| 0,8620615 | EPS8     | protein_coding |
| 0,7228815 | ACAD8    | protein_coding |
| 0,624851  | THYN1    | protein_coding |
| 0,9484395 | VPS26B   | protein_coding |
| 0,8062191 | NCAPD3   | protein_coding |
| 0,7589066 | VTI1A    | protein_coding |
| 0,9919804 | QDPR     | protein_coding |
| 0,6701082 | FAM160B1 | protein_coding |
| 0,7980625 | QTRT2    | protein_coding |
| 0,654521  | ZNF827   | protein_coding |
| 0,621682  | EDNRA    | protein_coding |
| 0,6254273 | NR3C2    | protein_coding |
| 0,9476094 | AKR1C2   | protein_coding |
| 0,6563172 | KIN      | protein_coding |
| 0,9033043 | PIGF     | protein_coding |
| 0,4309527 | ANKAR    | protein_coding |
| 0,5245497 | INPP1    | protein_coding |
| 0,3640941 | MFSD6    | protein_coding |

|           |            |                                  |
|-----------|------------|----------------------------------|
| 0,9621537 | RNF144A    | protein_coding                   |
| 0,7029174 | ASAP2      | protein_coding                   |
| 0,9439974 | ADAM17     | protein_coding                   |
| 0,8971058 | FLI1       | protein_coding                   |
| 0,8386162 | WWC2       | protein_coding                   |
| 0,9765371 | ACSL1      | protein_coding                   |
| 0,271425  | SLC25A4    | protein_coding                   |
| 0,2179973 | BICD1      | protein_coding                   |
| 0,9533676 | SAV1       | protein_coding                   |
| 0,855954  | NBAS       | protein_coding                   |
| 0,305334  | ZNF385D    | protein_coding                   |
| 0,6749061 | GUF1       | protein_coding                   |
| 0,9087161 | SACS       | protein_coding                   |
| 0,9536474 | CENPJ      | protein_coding                   |
| 0,4477996 | PARP8      | protein_coding                   |
| 0,571249  | GFRA1      | protein_coding                   |
| 0,427478  | CACUL1     | protein_coding                   |
| 0,9296784 | DST        | protein_coding                   |
| 0,8017181 | TIAL1      | protein_coding                   |
| 0,7190863 | BAG3       | protein_coding                   |
| 0,7611529 | SCHIP1     | protein_coding                   |
| 0,9385376 | RABGAP1L   | protein_coding                   |
| 0,81614   | TLCD4      | protein_coding                   |
| 0,8244461 | FAM168B    | protein_coding                   |
| 0,2332141 | PTPN14     | protein_coding                   |
| 0,9709611 | AC073869.1 | transcribed_processed_pseudogene |
| 0,913228  | MGAT5      | protein_coding                   |
| 0,9621537 | GPATCH11   | protein_coding                   |
| 0,7340252 | HSPB8      | protein_coding                   |
| 0,6613295 | OBI1       | protein_coding                   |
| 0,4932632 | SETBP1     | protein_coding                   |
| 0,7688687 | ARL14EP    | protein_coding                   |
| 0,7542355 | EPG5       | protein_coding                   |
| 0,4806087 | ATP5F1A    | protein_coding                   |
| 0,56634   | C18orf25   | protein_coding                   |
| 0,8885864 | PDK1       | protein_coding                   |
| 0,7546576 | PDE3B      | protein_coding                   |
| 0,8522739 | TGOLN2     | protein_coding                   |
| 0,673546  | UHMK1      | protein_coding                   |
| 0,391095  | SPOCK1     | protein_coding                   |
| 0,4020941 | TADA1      | protein_coding                   |
| 0,7905225 | GUCY1A2    | protein_coding                   |
| 0,9583708 | CWF19L2    | protein_coding                   |
| 0,6313749 | JMY        | protein_coding                   |
| 0,9233889 | HOMER1     | protein_coding                   |
| 0,9771336 | ZNF776     | protein_coding                   |
| 0,9142106 | ZNF256     | protein_coding                   |
| 0,7558125 | DCLRE1C    | protein_coding                   |
| 0,7842706 | NMT2       | protein_coding                   |
| 0,445647  | USP12      | protein_coding                   |
| 0,5440543 | CCDC50     | protein_coding                   |
| 0,6244656 | ZFP36L2    | protein_coding                   |
| 0,7291201 | PAN3       | protein_coding                   |
| 0,3640941 | PLEKHH2    | protein_coding                   |
| 0,7836389 | PFKM       | protein_coding                   |
| 0,8887908 | TMEM123    | protein_coding                   |
| 0,6516554 | IGSF10     | protein_coding                   |
| 0,4089968 | SPEF2      | protein_coding                   |
| 0,1107554 | SPARCL1    | protein_coding                   |

|           |          |                |
|-----------|----------|----------------|
| 0,8219774 | MBNL1    | protein_coding |
| 0,3695527 | NADK2    | protein_coding |
| 0,730414  | GPD1L    | protein_coding |
| 0,8387664 | GJA1     | protein_coding |
| 0,7673893 | SLC30A6  | protein_coding |
| 0,7546576 | PELO     | protein_coding |
| 0,7240635 | RASGRP3  | protein_coding |
| 0,5776471 | SAR1B    | protein_coding |
| 0,9768456 | GPR180   | protein_coding |
| 0,4740961 | WDR78    | protein_coding |
| 0,9680323 | FARP1    | protein_coding |
| 0,9424246 | IFIT5    | protein_coding |
| 0,1895063 | SLC16A12 | protein_coding |
| 0,9364287 | PANK1    | protein_coding |
| 0,9928407 | HNRNPDL  | protein_coding |
| 0,9463209 | UTRN     | protein_coding |
| 0,5510556 | PTPRK    | protein_coding |
| 0,6199488 | GGPS1    | protein_coding |
| 0,9142106 | ZNF117   | protein_coding |
| 0,6718649 | RAD17    | protein_coding |
| 0,671498  | MED21    | protein_coding |
| 0,9115427 | PLOD2    | protein_coding |
| 0,4750209 | ADGRA3   | protein_coding |
| 0,8801863 | SREK1IP1 | protein_coding |
| 0,7291201 | CWC27    | protein_coding |
| 0,1642927 | MR1      | protein_coding |
| 0,6333516 | SRP19    | protein_coding |
| 0,9792506 | CDYL     | protein_coding |
| 0,993752  | CARHSP1  | protein_coding |
| 0,7118106 | TXNDC11  | protein_coding |
| 0,8996732 | DAB2     | protein_coding |
| 0,1382998 | BCL2L11  | protein_coding |
| 0,8823583 | ANAPC1   | protein_coding |
| 0,330331  | CAST     | protein_coding |
| 0,6287358 | SCOC     | protein_coding |
| 0,4726081 | CLGN     | protein_coding |
| 0,7940001 | CETN3    | protein_coding |
| 0,7154026 | SMARCA5  | protein_coding |
| 0,9883187 | RGPD3    | protein_coding |
| 0,9310151 | RASSF3   | protein_coding |
| 0,9248086 | HNRNPU   | protein_coding |
| 0,8189129 | RANBP2   | protein_coding |
| 0,9746059 | AHCTF1   | protein_coding |
| 0,5641983 | MERTK    | protein_coding |
| 0,7104968 | TMEM87B  | protein_coding |
| 0,1431227 | NR4A2    | protein_coding |
| 0,349409  | PLA2R1   | protein_coding |
| 0,7010516 | RBMS1    | protein_coding |
| 0,5848767 | SLC25A27 | protein_coding |
| 0,7472131 | FAM49B   | protein_coding |
| 0,947809  | ASAP1    | protein_coding |
| 0,8575378 | TRAPPC8  | protein_coding |
| 0,784306  | LPCAT1   | protein_coding |
| 0,5625279 | ADPRHL1  | protein_coding |
| 0,9548854 | UBP1     | protein_coding |
| 0,7072223 | RMND5A   | protein_coding |
| 0,624851  | PTPRD    | protein_coding |
| 0,6844359 | CNKSR3   | protein_coding |
| 0,6513411 | CFDP1    | protein_coding |

|           |          |                                    |
|-----------|----------|------------------------------------|
| 0,8099847 | ZDHHC7   | protein_coding                     |
| 0,9925374 | JAZF1    | protein_coding                     |
| 0,7125689 | CMIP     | protein_coding                     |
| 0,8436853 | SPHKAP   | protein_coding                     |
| 0,6563172 | PID1     | protein_coding                     |
| 0,8941532 | TRIP12   | protein_coding                     |
| 0,3850967 | CEBPG    | protein_coding                     |
| 0,3697716 | DDAH1    | protein_coding                     |
| 0,7558125 | SREK1    | protein_coding                     |
| 0,9761152 | CHD1     | protein_coding                     |
| 0,887128  | DGKE     | protein_coding                     |
| 0,702199  | HS2ST1   | protein_coding                     |
| 0,7444016 | MSI2     | protein_coding                     |
| 0,8695843 | CACNA2D1 | protein_coding                     |
| 0,9603194 | NUS1     | protein_coding                     |
| 0,8722519 | PPP2R5E  | protein_coding                     |
| 0,7213265 | IMPACT   | protein_coding                     |
| 0,8746152 | TBCEL    | protein_coding                     |
| 0,5456715 | ANKH     | protein_coding                     |
| 0,9486004 | OTULIN   | protein_coding                     |
| 0,9784835 | ROBO4    | protein_coding                     |
| 0,9709611 | TBRG1    | protein_coding                     |
| 0,160824  | RETREG1  | protein_coding                     |
| 0,5869808 | TOMM70   | protein_coding                     |
| 0,8834615 | ABI3BP   | protein_coding                     |
| 0,7314802 | ANGPT1   | protein_coding                     |
| 0,472118  | PITPNC1  | protein_coding                     |
| 0,8255291 | CC2D1B   | protein_coding                     |
| 0,1872555 | PRKCA    | protein_coding                     |
| 0,9237476 | CEP112   | protein_coding                     |
| 0,2419676 | ABCA9    | protein_coding                     |
| 0,7163823 | ABCA6    | protein_coding                     |
| 0,2644142 | ABCA10   | protein_coding                     |
| 0,6785825 | ABCA5    | protein_coding                     |
| 0,0486965 | UCHL1    | protein_coding                     |
| 0,7980597 | MIA3     | protein_coding                     |
| 0,5998801 | DISP1    | protein_coding                     |
| 0,90504   | TNIK     | protein_coding                     |
| 0,5347705 | NEIL2    | protein_coding                     |
| 0,7682033 | PGM5     | protein_coding                     |
| 0,9934576 | OBSCN    | protein_coding                     |
| 0,8383977 | LONRF1   | protein_coding                     |
| 0,1100299 | ENAH     | protein_coding                     |
| 0,4971845 | PPP1R3A  | protein_coding                     |
| 0,9233889 | CCSAP    | protein_coding                     |
| 0,5964345 | SH3RF1   | protein_coding                     |
| 0,9944531 | BUB3     | protein_coding                     |
| 0,7762876 | DIPK1A   | protein_coding                     |
| 0,097271  | ATP5MC3  | protein_coding                     |
| 0,2984194 | CNTNAP3B | protein_coding                     |
| 0,9341044 | PDLIM3   | protein_coding                     |
| 0,6527079 | SORBS2   | protein_coding                     |
| 0,2205761 | ELOC     | protein_coding                     |
| 0,8992483 | CEP170P1 | transcribed_unprocessed_pseudogene |
| 0,3558016 | CXADR    | protein_coding                     |
| 0,9917279 | C21orf91 | protein_coding                     |
| 0,6591379 | L3MBTL4  | protein_coding                     |
| 0,806856  | PDE1C    | protein_coding                     |
| 0,2560075 | MRPL39   | protein_coding                     |

|           |           |                                    |
|-----------|-----------|------------------------------------|
| 0,713782  | JAM2      | protein_coding                     |
| 0,1277681 | ATP5PF    | protein_coding                     |
| 0,9671548 | GABPA     | protein_coding                     |
| 0,5768067 | ADAMTS1   | protein_coding                     |
| 0,7744962 | ADAMTS5   | protein_coding                     |
| 0,4602818 | TSEN2     | protein_coding                     |
| 0,0606893 | XPC       | protein_coding                     |
| 0,90504   | CCDC174   | protein_coding                     |
| 0,9928407 | FGD5      | protein_coding                     |
| 0,9792506 | FLCN      | protein_coding                     |
| 0,3830653 | DPH3      | protein_coding                     |
| 0,4835164 | OXNAD1    | protein_coding                     |
| 0,437327  | PLCL2     | protein_coding                     |
| 0,6591127 | PPP4R1    | protein_coding                     |
| 0,5600133 | APCDD1    | protein_coding                     |
| 0,9536474 | CCDC144B  | transcribed_unprocessed_pseudogene |
| 0,6087679 | MPPE1     | protein_coding                     |
| 0,9081173 | CCDC144CP | transcribed_processed_pseudogene   |
| 0,5207698 | RAB6B     | protein_coding                     |
| 0,7444016 | ACSS1     | protein_coding                     |
| 0,9450135 | ANKRD40   | protein_coding                     |
| 0,4008367 | VOPP1     | protein_coding                     |
| 0,7258802 | APOOL     | protein_coding                     |
| 0,2072047 | CYP2U1    | protein_coding                     |
| 0,4033416 | AK9       | protein_coding                     |
| 0,7912354 | KLF10     | protein_coding                     |
| 0,7271508 | AZIN1     | protein_coding                     |
| 0,997931  | ATP6V1C1  | protein_coding                     |
| 0,4312749 | PIP4P2    | protein_coding                     |
| 0,7816527 | OTUD6B    | protein_coding                     |
| 0,54642   | CDK19     | protein_coding                     |
| 0,1129731 | GTF3C6    | protein_coding                     |
| 0,3691605 | TTC39B    | protein_coding                     |
| 0,9411751 | AGPAT5    | protein_coding                     |
| 0,936881  | MMS19     | protein_coding                     |
| 0,8118149 | PI4K2A    | protein_coding                     |
| 0,623981  | ZFYVE27   | protein_coding                     |
| 0,5909829 | SLC25A28  | protein_coding                     |
| 0,8422988 | HSPA13    | protein_coding                     |
| 0,9756408 | USP25     | protein_coding                     |
| 0,7824563 | GRAMD2B   | protein_coding                     |
| 0,7125689 | ZCCHC10   | protein_coding                     |
| 0,5773589 | C16orf87  | protein_coding                     |
| 0,817424  | MOV10     | protein_coding                     |
| 0,7956173 | RHOC      | protein_coding                     |
| 0,7842247 | DBI       | protein_coding                     |
| 0,9508384 | SLC16A1   | protein_coding                     |
| 0,4076876 | HEATR3    | protein_coding                     |
| 0,9917279 | NIFK      | protein_coding                     |
| 0,8500846 | OXA1L     | protein_coding                     |
| 0,8799382 | LARP1     | protein_coding                     |
| 0,8790123 | CNOT8     | protein_coding                     |
| 0,9933219 | MIER3     | protein_coding                     |
| 0,4835164 | NUP205    | protein_coding                     |
| 0,8500846 | ZKSCAN2   | protein_coding                     |
| 0,5433886 | PIK3AP1   | protein_coding                     |
| 0,8117718 | RBM45     | protein_coding                     |
| 0,7940001 | TTN       | protein_coding                     |
| 0,0286685 | VSIG4     | protein_coding                     |

|           |          |                |
|-----------|----------|----------------|
| 0,6634961 | PDIA4    | protein_coding |
| 0,5995805 | KCTD18   | protein_coding |
| 0,8712074 | FAM126B  | protein_coding |
| 0,8993494 | C2CD6    | protein_coding |
| 0,6662301 | TMEM237  | protein_coding |
| 0,0015119 | FZD7     | protein_coding |
| 0,9082846 | RNF20    | protein_coding |
| 0,8500846 | PPARGC1B | protein_coding |
| 0,9156816 | ELMO1    | protein_coding |
| 0,9644268 | SLC26A2  | protein_coding |
| 0,5768067 | MED7     | protein_coding |
| 0,9166492 | RRAGA    | protein_coding |
| 0,7713242 | PXYLP1   | protein_coding |
| 0,8992483 | RASA2    | protein_coding |
| 0,5474737 | RMND1    | protein_coding |
| 0,3371364 | SLA      | protein_coding |
| 0,9142106 | TMBIM4   | protein_coding |
| 0,4063431 | VBP1     | protein_coding |
| 0,5622225 | CLIC2    | protein_coding |
| 0,9264426 | MICU3    | protein_coding |
| 0,7311739 | VPS37A   | protein_coding |
| 0,645515  | PSD3     | protein_coding |
| 0,8062191 | CARNMT1  | protein_coding |
| 0,9496064 | MCU      | protein_coding |
| 0,3776155 | ELMSAN1  | protein_coding |
| 0,5664111 | CFAP70   | protein_coding |
| 0,6653209 | GNAQ     | protein_coding |
| 0,3280381 | UGT2B4   | protein_coding |
| 0,4600881 | MMP16    | protein_coding |
| 0,0839464 | ADK      | protein_coding |
| 0,8330359 | DCK      | protein_coding |
| 0,9854182 | DPY19L4  | protein_coding |
| 0,5347705 | NDUFAF6  | protein_coding |
| 0,5028151 | DRAM2    | protein_coding |
| 0,7743102 | ADAMTSL3 | protein_coding |
| 0,3880092 | ART3     | protein_coding |
| 0,8117718 | WHAMM    | protein_coding |
| 0,7546576 | N6AMT1   | protein_coding |
| 0,2499691 | RWDD2B   | protein_coding |
| 0,6500583 | USP16    | protein_coding |
| 0,479851  | CCT8     | protein_coding |
| 0,8919058 | BACH1    | protein_coding |
| 0,458152  | TSPAN7   | protein_coding |
| 0,9998478 | SCAF4    | protein_coding |
| 0,4835164 | RPGR     | protein_coding |
| 0,6903585 | ANKRD9   | protein_coding |
| 0,1412577 | ATP5MPL  | protein_coding |
| 0,4847278 | PCDH1    | protein_coding |
| 0,9997039 | SH3RF2   | protein_coding |
| 0,1773741 | UQCRB    | protein_coding |
| 0,0286685 | MTERF3   | protein_coding |
| 0,0075305 | PTDSS1   | protein_coding |
| 0,692146  | RPL30    | protein_coding |
| 0,4748134 | SUPV3L1  | protein_coding |
| 0,7418156 | FAM122B  | protein_coding |
| 0,5245497 | EEF1A1   | protein_coding |
| 0,8117718 | HK1      | protein_coding |
| 0,9578269 | PHF6     | protein_coding |
| 0,7915374 | CD109    | protein_coding |

|           |           |                |
|-----------|-----------|----------------|
| 0,4835164 | UBE2L6    | protein_coding |
| 0,9645685 | ZDHHC5    | protein_coding |
| 0,9894339 | ZFAND3    | protein_coding |
| 0,4112262 | NPTN      | protein_coding |
| 0,9391828 | KAT6B     | protein_coding |
| 0,9761718 | SAMD8     | protein_coding |
| 0,0811214 | RAB11FIP1 | protein_coding |
| 0,8189129 | UTP14A    | protein_coding |
| 0,330331  | AIFM1     | protein_coding |
| 0,9914435 | BAG4      | protein_coding |
| 0,9533049 | TBC1D31   | protein_coding |
| 0,3801685 | WDYHV1    | protein_coding |
| 0,9759101 | ATAD2     | protein_coding |
| 0,9965961 | FBXO32    | protein_coding |
| 0,5777334 | NSMCE2    | protein_coding |
| 0,874444  | COX6A2    | protein_coding |
| 0,1536666 | MALSU1    | protein_coding |
| 0,4311333 | VPS8      | protein_coding |
| 0,6951729 | GALK2     | protein_coding |
| 0,9781148 | EIF4A2    | protein_coding |
| 0,3280381 | RPUSD3    | protein_coding |
| 0,922549  | SEC13     | protein_coding |
| 0,9792506 | EXOG      | protein_coding |
| 0,8836774 | NTAN1     | protein_coding |
| 0,6867028 | NMNAT2    | protein_coding |
| 0,7956173 | ZFYVE9    | protein_coding |
| 0,9928407 | SMG1      | protein_coding |
| 0,6999614 | FCHO2     | protein_coding |
| 0,7763012 | RBPMS     | protein_coding |
| 0,9781971 | TIMP4     | protein_coding |
| 0,7940001 | ODR4      | protein_coding |
| 0,5336185 | CPT2      | protein_coding |
| 0,9248086 | NECAP2    | protein_coding |
| 0,90504   | PAXIP1    | protein_coding |
| 0,9463928 | STEAP2    | protein_coding |
| 0,8552255 | SSBP3     | protein_coding |
| 0,3558016 | CLDN12    | protein_coding |
| 0,9982092 | MMP14     | protein_coding |
| 0,4957019 | FZD1      | protein_coding |
| 0,6527079 | GATAD1    | protein_coding |
| 0,7663988 | DHRS4     | protein_coding |
| 0,9998478 | DDX19B    | protein_coding |
| 0,565522  | ST3GAL2   | protein_coding |
| 0,9210173 | AASDH     | protein_coding |
| 0,5111636 | CACNA2D3  | protein_coding |
| 0,8888699 | RNF111    | protein_coding |
| 0,933129  | MYO1E     | protein_coding |
| 0,895571  | APPL1     | protein_coding |
| 0,4524087 | AFAP1L1   | protein_coding |
| 0,4732706 | TSC22D3   | protein_coding |
| 0,8436853 | VPS26C    | protein_coding |
| 0,9928407 | DYRK1A    | protein_coding |
| 0,7972313 | ERG       | protein_coding |
| 0,4767674 | ETS2      | protein_coding |
| 0,9700303 | TSPAN18   | protein_coding |
| 0,9171648 | SLC35B2   | protein_coding |
| 0,9496064 | TMEM164   | protein_coding |
| 0,2834613 | MX1       | protein_coding |
| 0,4806087 | C2CD2     | protein_coding |

|           |             |                |
|-----------|-------------|----------------|
| 0,8575378 | TAB3        | protein_coding |
| 0,4032255 | SLC38A10    | protein_coding |
| 0,9919069 | PALM2-AKAP2 | protein_coding |
| 0,0486965 | DGKI        | protein_coding |
| 0,0413597 | SNX22       | protein_coding |
| 0,4498511 | UBN2        | protein_coding |
| 0,7318327 | BRAF        | protein_coding |
| 0,8117718 | WDR19       | protein_coding |
| 0,8183781 | SLC37A3     | protein_coding |
| 0,8939634 | AP3S2       | protein_coding |
| 0,9082846 | FMNL2       | protein_coding |
| 0,4040485 | SPPL3       | protein_coding |
| 0,9840915 | RAB28       | protein_coding |
| 0,8695843 | PANK4       | protein_coding |
| 0,3881918 | RER1        | protein_coding |
| 0,7662231 | SKI         | protein_coding |
| 0,9781971 | WIPI2       | protein_coding |
| 0,8394189 | AGAP1       | protein_coding |
| 0,8397121 | BABAM2      | protein_coding |
| 0,4906292 | TRIM63      | protein_coding |
| 0,4032255 | MRPL17      | protein_coding |
| 0,5953122 | PTPDC1      | protein_coding |
| 0,9998478 | NCK1        | protein_coding |
| 0,6505186 | TPRG1L      | protein_coding |
| 0,3316892 | PRXL2C      | protein_coding |
| 0,9233889 | CNNM4       | protein_coding |
| 0,8197846 | EYA3        | protein_coding |
| 0,7984578 | FANCC       | protein_coding |
| 0,6440403 | MRAS        | protein_coding |
| 0,4750209 | WASF2       | protein_coding |
| 0,9464798 | CLSTN2      | protein_coding |
| 0,7137584 | COLEC12     | protein_coding |
| 0,6610925 | RNF207      | protein_coding |
| 0,5276954 | CUL4B       | protein_coding |
| 0,4311333 | GPRASP2     | protein_coding |
| 0,4161706 | AUTS2       | protein_coding |
| 0,7740102 | SHROOM4     | protein_coding |
| 0,9953531 | MITD1       | protein_coding |
| 0,9481776 | EIF5B       | protein_coding |
| 0,9406097 | CNOT11      | protein_coding |
| 0,3881918 | AHCYL2      | protein_coding |
| 0,4521055 | B4GALT5     | protein_coding |
| 0,4585504 | TSR2        | protein_coding |
| 0,8941532 | PPP1R9A     | protein_coding |
| 0,4477996 | DYNC1I1     | protein_coding |
| 0,5011485 | TMED4       | protein_coding |
| 0,4954628 | PPP1R15B    | protein_coding |
| 0,943695  | COPG2       | protein_coding |
| 0,8062191 | EMSY        | protein_coding |
| 0,8425029 | GPAT4       | protein_coding |
| 0,9364287 | ZSCAN12     | protein_coding |
| 0,9792506 | TAGLN2      | protein_coding |
| 0,9481776 | ELK4        | protein_coding |
| 0,7171927 | NBL1        | protein_coding |
| 0,7842706 | F11R        | protein_coding |
| 0,9781971 | USF1        | protein_coding |
| 0,6462233 | NIT1        | protein_coding |
| 0,7291201 | DEDD        | protein_coding |
| 0,1712026 | EDA         | protein_coding |



|           |          |                |
|-----------|----------|----------------|
| 0,8863508 | PINK1    | protein_coding |
| 0,7558125 | DMTN     | protein_coding |
| 0,0385201 | ADAMTS4  | protein_coding |
| 0,8575378 | FAM160B2 | protein_coding |
| 0,2737133 | NDUFS2   | protein_coding |
| 0,1574812 | FCER1G   | protein_coding |
| 0,138108  | TOMM40L  | protein_coding |
| 0,8930787 | CCAR2    | protein_coding |
| 0,5073762 | CACHD1   | protein_coding |
| 0,9410289 | CDC42SE2 | protein_coding |
| 0,7940988 | RAPGEF6  | protein_coding |
| 0,6101378 | EPB41    | protein_coding |
| 0,8062191 | ALG8     | protein_coding |
| 0,9142106 | FBXW5    | protein_coding |
| 0,9112805 | SYNJ1    | protein_coding |
| 0,9270004 | PAXBP1   | protein_coding |
| 0,9944531 | MRPL10   | protein_coding |
| 0,9998478 | IFNGR2   | protein_coding |
| 0,4831898 | GART     | protein_coding |
| 0,9928407 | SON      | protein_coding |
| 0,5510556 | CSRP1    | protein_coding |
| 0,8255851 | C1QC     | protein_coding |
| 0,0998266 | ATP5MC1  | protein_coding |
| 0,3212727 | RCAN1    | protein_coding |
| 0,47585   | UBE2Z    | protein_coding |
| 0,4835164 | SNF8     | protein_coding |
| 0,9450135 | RUNX1    | protein_coding |
| 0,284683  | ACTC1    | protein_coding |
| 0,9182782 | MORC3    | protein_coding |
| 0,9424246 | HLCS     | protein_coding |
| 0,8318519 | ARHGAP27 | protein_coding |
| 0,9745853 | ADPGK    | protein_coding |
| 0,9112805 | PTMS     | protein_coding |
| 0,9463209 | ADIPOR1  | protein_coding |
| 0,4806087 | CYB5R1   | protein_coding |
| 0,4835164 | PSMD4    | protein_coding |
| 0,8062191 | PSMB4    | protein_coding |
| 0,9142106 | BTG2     | protein_coding |
| 0,6285359 | HK2      | protein_coding |
| 0,9804708 | C1R      | protein_coding |
| 0,6867028 | ALDH4A1  | protein_coding |
| 0,7956408 | STARD9   | protein_coding |
| 0,7444016 | THEM4    | protein_coding |
| 0,8859349 | UBR1     | protein_coding |
| 0,9853651 | AMFR     | protein_coding |
| 0,7431973 | MED8     | protein_coding |
| 0,7747743 | RSPRY1   | protein_coding |
| 0,8060644 | GPBP1L1  | protein_coding |
| 0,5972873 | NAE1     | protein_coding |
| 0,7954765 | TMEM69   | protein_coding |
| 0,5062136 | EFCAB14  | protein_coding |
| 0,9917279 | CTBP1    | protein_coding |
| 0,9002008 | ATP6V0D1 | protein_coding |
| 0,8130747 | RGS12    | protein_coding |
| 0,931978  | PSKH1    | protein_coding |
| 0,7589066 | ZYX      | protein_coding |
| 0,7291201 | ABR      | protein_coding |
| 0,3049645 | CCDC117  | protein_coding |
| 0,7132753 | NPR2     | protein_coding |

|           |          |                |
|-----------|----------|----------------|
| 0,9781148 | ZNF235   | protein_coding |
| 0,9810229 | GNE      | protein_coding |
| 0,9379013 | ARHGAP35 | protein_coding |
| 0,611428  | CALM3    | protein_coding |
| 0,9463928 | DFFA     | protein_coding |
| 0,6371005 | BSDC1    | protein_coding |
| 0,4799252 | SSU72    | protein_coding |
| 0,7154026 | ZNF362   | protein_coding |
| 0,3150284 | FNDCC5   | protein_coding |
| 0,796666  | CPAMD8   | protein_coding |
| 0,8698319 | VMA21    | protein_coding |
| 0,7397205 | KALRN    | protein_coding |
| 0,3803906 | ABCG1    | protein_coding |
| 0,2073391 | NDUFV3   | protein_coding |
| 0,5909829 | U2AF1    | protein_coding |
| 0,931978  | RRP1B    | protein_coding |
| 0,7634906 | PDXK     | protein_coding |
| 0,7558125 | CSTB     | protein_coding |
| 0,7921707 | AGPAT3   | protein_coding |
| 0,9702772 | TRAPPC10 | protein_coding |
| 0,9307184 | GAB3     | protein_coding |
| 0,8481719 | GATD3A   | protein_coding |
| 0,7611529 | ITGB2    | protein_coding |
| 0,9933479 | LSS      | protein_coding |
| 0,9481776 | MCM3AP   | protein_coding |
| 0,2656432 | PCNT     | protein_coding |
| 0,7785565 | DIP2A    | protein_coding |
| 0,5768067 | PRMT2    | protein_coding |
| 0,2068936 | ZNF208   | protein_coding |
| 0,9804708 | ZNF761   | protein_coding |
| 0,7135515 | C19orf47 | protein_coding |
| 0,9011545 | RDH13    | protein_coding |
| 0,5245497 | ZER1     | protein_coding |
| 0,6168923 | PLPP7    | protein_coding |
| 0,855954  | TAOK1    | protein_coding |
| 0,9169269 | SIK3     | protein_coding |
| 0,5117223 | JAML     | protein_coding |
| 0,9583561 | PCSK7    | protein_coding |
| 0,7611529 | SAFB     | protein_coding |
| 0,5666553 | S100A1   | protein_coding |
| 0,726381  | CHTOP    | protein_coding |
| 0,8015756 | ZBTB7B   | protein_coding |
| 0,4894579 | FLAD1    | protein_coding |
| 0,9003006 | SHC1     | protein_coding |
| 0,747138  | VPS11    | protein_coding |
| 0,5166442 | ADAR     | protein_coding |
| 0,6383874 | IL6R     | protein_coding |
| 0,9210173 | UBE2Q1   | protein_coding |
| 0,9804708 | ANO10    | protein_coding |
| 0,4684539 | FDPS     | protein_coding |
| 0,7763012 | SLC25A44 | protein_coding |
| 0,8992483 | LMNA     | protein_coding |
| 0,9296784 | NBEAL2   | protein_coding |
| 0,9333994 | UBQLN4   | protein_coding |
| 0,998169  | MYL3     | protein_coding |
| 0,3520154 | GPATCH4  | protein_coding |
| 0,4433415 | AZGP1    | protein_coding |
| 0,9781971 | ZNF394   | protein_coding |
| 0,9767278 | VPS28    | protein_coding |

|           |         |                |
|-----------|---------|----------------|
| 0,5453247 | PWWP3A  | protein_coding |
| 0,9998478 | ZNF333  | protein_coding |
| 0,3358222 | MRNIP   | protein_coding |
| 0,3765746 | SQSTM1  | protein_coding |
| 0,3792977 | MGAT4B  | protein_coding |
| 0,8914719 | RPL8    | protein_coding |
| 0,997931  | MAML1   | protein_coding |
| 0,6588074 | NAPEPLD | protein_coding |
| 0,3894807 | PSMC2   | protein_coding |
| 0,6563172 | DVL3    | protein_coding |
| 0,9260532 | AP2M1   | protein_coding |
| 0,9463209 | ABCF3   | protein_coding |
| 0,997931  | PCYT1A  | protein_coding |
| 0,3358601 | BDH1    | protein_coding |
| 0,4765298 | COX7A1  | protein_coding |
| 0,931978  | ZNF382  | protein_coding |
| 0,3831225 | PLXDC1  | protein_coding |
| 0,5024483 | SAP30BP | protein_coding |
| 0,8035834 | ACOX1   | protein_coding |
| 0,458152  | PRPSAP1 | protein_coding |
| 0,9700303 | SRSF2   | protein_coding |
| 0,2933095 | ZNF577  | protein_coding |
| 0,9270004 | ITGA5   | protein_coding |
| 0,2329611 | MPP3    | protein_coding |
| 0,2971924 | LSM12   | protein_coding |
| 0,426935  | EMC10   | protein_coding |
| 0,1482066 | FMNL3   | protein_coding |
| 0,7226369 | LARP4   | protein_coding |
| 0,6371005 | IP6K3   | protein_coding |
| 0,8578793 | LEMD2   | protein_coding |
| 0,8992483 | BCL6B   | protein_coding |
| 0,9316489 | RPL26   | protein_coding |
| 0,1951241 | SNRNP25 | protein_coding |
| 0,4422012 | ZNF75A  | protein_coding |
| 0,9248086 | ADCY9   | protein_coding |
| 0,8189129 | CLPB    | protein_coding |
| 0,6227164 | NEU3    | protein_coding |
| 0,995098  | UBXN1   | protein_coding |
| 0,9956943 | NXF1    | protein_coding |
| 0,6988495 | STX5    | protein_coding |
| 0,7662231 | RPL29   | protein_coding |
| 0,7114715 | SYVN1   | protein_coding |
| 0,1100299 | LRP5    | protein_coding |
| 0,6098976 | CMPK1   | protein_coding |
| 0,7639764 | COA7    | protein_coding |
| 0,9484395 | ZYG11B  | protein_coding |
| 0,565522  | CZIB    | protein_coding |
| 0,9484259 | ACOT11  | protein_coding |
| 0,8295097 | USP24   | protein_coding |
| 0,0895372 | PLPP3   | protein_coding |
| 0,9917279 | NOL9    | protein_coding |
| 0,9917279 | PRKAA2  | protein_coding |
| 0,8031748 | KLHL21  | protein_coding |
| 0,9081173 | SELENON | protein_coding |
| 0,8309678 | AK4     | protein_coding |
| 0,9548854 | JAK1    | protein_coding |
| 0,4105939 | RAVER2  | protein_coding |
| 0,6867028 | LZIC    | protein_coding |
| 0,2440137 | FBLIM1  | protein_coding |

|           |          |                |
|-----------|----------|----------------|
| 0,5347705 | DHRS3    | protein_coding |
| 0,887128  | LAPTM5   | protein_coding |
| 0,3358222 | SDC3     | protein_coding |
| 0,9998478 | PEF1     | protein_coding |
| 0,615864  | RBBP4    | protein_coding |
| 0,1431468 | MXRA8    | protein_coding |
| 0,9312186 | NFIA     | protein_coding |
| 0,9925374 | OMA1     | protein_coding |
| 0,645515  | MYSM1    | protein_coding |
| 0,8721867 | TM2D1    | protein_coding |
| 0,8956453 | USP1     | protein_coding |
| 0,916788  | FUBP1    | protein_coding |
| 0,9210173 | NEXN     | protein_coding |
| 0,9781971 | DNAJB4   | protein_coding |
| 0,4321437 | ADGRL4   | protein_coding |
| 0,9669517 | TYW3     | protein_coding |
| 0,5880659 | SNX7     | protein_coding |
| 0,3572155 | B3GALT2  | protein_coding |
| 0,3316892 | FAM102B  | protein_coding |
| 0,8259599 | C1orf52  | protein_coding |
| 0,9998478 | GBP2     | protein_coding |
| 0,933129  | GBP4     | protein_coding |
| 0,9033043 | ZNF326   | protein_coding |
| 0,8885864 | HFM1     | protein_coding |
| 0,1712026 | KCNT2    | protein_coding |
| 0,6373029 | AGL      | protein_coding |
| 0,9341044 | VCAM1    | protein_coding |
| 0,9450135 | EXTL2    | protein_coding |
| 0,6785825 | SLC30A7  | protein_coding |
| 0,9551108 | ZNF281   | protein_coding |
| 0,8441592 | ARPC5    | protein_coding |
| 0,4894579 | ZNF496   | protein_coding |
| 0,9406097 | DDR2     | protein_coding |
| 0,9481776 | PEA15    | protein_coding |
| 0,9792506 | PEX19    | protein_coding |
| 0,8622295 | NCSTN    | protein_coding |
| 0,6254273 | ATF3     | protein_coding |
| 0,9953531 | RBM15    | protein_coding |
| 0,5511615 | IER5     | protein_coding |
| 0,8829558 | SNED1    | protein_coding |
| 0,9374881 | BPNT1    | protein_coding |
| 0,3514523 | C1orf115 | protein_coding |
| 0,7858129 | BROX     | protein_coding |
| 0,5768067 | NBPF20   | protein_coding |
| 0,4141191 | ACP6     | protein_coding |
| 0,8265935 | TFB2M    | protein_coding |
| 0,7397205 | CNST     | protein_coding |
| 0,2337466 | PPP1R21  | protein_coding |
| 0,3094135 | PKDCC    | protein_coding |
| 0,2354584 | B3GALNT2 | protein_coding |
| 0,7190863 | MAPKAPK2 | protein_coding |
| 0,7154026 | CAPN2    | protein_coding |
| 0,768388  | WDR26    | protein_coding |
| 0,595282  | REL      | protein_coding |
| 0,8189129 | PUS10    | protein_coding |
| 0,764019  | PEX13    | protein_coding |
| 0,9734904 | KIAA1841 | protein_coding |
| 0,4828854 | RFTN2    | protein_coding |
| 0,997931  | DISC1    | protein_coding |

|           |          |                |
|-----------|----------|----------------|
| 0,7104968 | DPY30    | protein_coding |
| 0,953175  | TYW5     | protein_coding |
| 0,330331  | SLC66A3  | protein_coding |
| 0,9900815 | ARL5A    | protein_coding |
| 0,2403842 | KCNJ3    | protein_coding |
| 0,9432348 | DUSP19   | protein_coding |
| 0,7506449 | CFAP36   | protein_coding |
| 0,9406097 | NUP35    | protein_coding |
| 0,8941532 | SMC6     | protein_coding |
| 0,8454927 | VSNL1    | protein_coding |
| 0,8153751 | H3F3A    | protein_coding |
| 0,3113413 | COQ8A    | protein_coding |
| 0,8176511 | SGCB     | protein_coding |
| 0,7569416 | NOSTRIN  | protein_coding |
| 0,8653179 | XIRP2    | protein_coding |
| 0,9625751 | SMARCAD1 | protein_coding |
| 0,8050685 | PDLIM5   | protein_coding |
| 0,6316303 | RPRD2    | protein_coding |
| 0,9998478 | CTSS     | protein_coding |
| 0,9253623 | PACRGL   | protein_coding |
| 0,9127443 | VPS72    | protein_coding |
| 0,9917279 | ERCC3    | protein_coding |
| 0,5225448 | RNF149   | protein_coding |
| 0,3049645 | IWS1     | protein_coding |
| 0,8992483 | CDC42EP3 | protein_coding |
| 0,8833312 | S100A11  | protein_coding |
| 0,7894641 | DHX57    | protein_coding |
| 0,54642   | S100A9   | protein_coding |
| 0,3772742 | CCNYL1   | protein_coding |
| 0,6604792 | DCAF16   | protein_coding |
| 0,7258802 | GNPDA2   | protein_coding |
| 0,9802452 | PAQR3    | protein_coding |
| 0,8481719 | ANTXR2   | protein_coding |
| 0,9700639 | HELQ     | protein_coding |
| 0,2737133 | MRPS18C  | protein_coding |
| 0,9538485 | CGGBP1   | protein_coding |
| 0,4372888 | GPR155   | protein_coding |
| 0,4847278 | PMVK     | protein_coding |
| 0,9551108 | PBXIP1   | protein_coding |
| 0,6999614 | PYGO2    | protein_coding |
| 0,8992483 | HIPK1    | protein_coding |
| 0,8716837 | COL6A3   | protein_coding |
| 0,9544158 | YY1AP1   | protein_coding |
| 0,8318664 | KBTBD8   | protein_coding |
| 0,5647201 | EOGT     | protein_coding |
| 0,6564675 | LMOD3    | protein_coding |
| 0,5848767 | NAXE     | protein_coding |
| 0,9312186 | POGLUT1  | protein_coding |
| 0,6225174 | ATP1A1   | protein_coding |
| 0,6574161 | EIF4E3   | protein_coding |
| 0,8406321 | LRRC58   | protein_coding |
| 0,7774855 | FSTL1    | protein_coding |
| 0,4627775 | LMOD1    | protein_coding |
| 0,7661133 | TMEM183A | protein_coding |
| 0,146655  | IGFBP7   | protein_coding |
| 0,7972313 | ARPC2    | protein_coding |
| 0,2533818 | CCT3     | protein_coding |
| 0,8161522 | SSR2     | protein_coding |
| 0,702199  | NEK10    | protein_coding |

|           |          |                |
|-----------|----------|----------------|
| 0,9205351 | CCDC141  | protein_coding |
| 0,9705617 | CWC22    | protein_coding |
| 0,6168923 | AZI2     | protein_coding |
| 0,3387057 | TGFBR2   | protein_coding |
| 0,768388  | ANKZF1   | protein_coding |
| 0,9127443 | HDAC11   | protein_coding |
| 0,645515  | FBLN2    | protein_coding |
| 0,9925374 | STT3B    | protein_coding |
| 0,0941174 | CHCHD4   | protein_coding |
| 0,2506935 | NFASC    | protein_coding |
| 0,8422763 | CLASP2   | protein_coding |
| 0,202023  | SUCLG1   | protein_coding |
| 0,4498511 | PRKCI    | protein_coding |
| 0,7921707 | MNDA     | protein_coding |
| 0,4463195 | IFI16    | protein_coding |
| 0,9245441 | EIF5A2   | protein_coding |
| 0,0336588 | PPM1L    | protein_coding |
| 0,9997651 | ICA1L    | protein_coding |
| 0,7444016 | SNHG16   | lncRNA         |
| 0,641691  | RYBP     | protein_coding |
| 0,8189129 | PPP4R2   | protein_coding |
| 0,2842973 | GTPBP8   | protein_coding |
| 0,8185595 | NEPRO    | protein_coding |
| 0,6563172 | CADPS    | protein_coding |
| 0,9452386 | WDFY3    | protein_coding |
| 0,8131645 | COX18    | protein_coding |
| 0,3269911 | PTPN13   | protein_coding |
| 0,445647  | THOC7    | protein_coding |
| 0,4141191 | PSMD6    | protein_coding |
| 0,9789395 | PRICKLE2 | protein_coding |
| 0,2474819 | ADAMTS9  | protein_coding |
| 0,887128  | PPM1K    | protein_coding |
| 0,656867  | GMPS     | protein_coding |
| 0,9316489 | TIPARP   | protein_coding |
| 0,849692  | CCNL1    | protein_coding |
| 0,9731251 | SLMAP    | protein_coding |
| 0,5346782 | RPL9     | protein_coding |
| 0,645515  | SMIM14   | protein_coding |
| 0,9629003 | RPP14    | protein_coding |
| 0,7550845 | APBB2    | protein_coding |
| 0,9309593 | CRELD1   | protein_coding |
| 0,6855507 | PCOLCE2  | protein_coding |
| 0,7552965 | U2SURP   | protein_coding |
| 0,9817457 | MTMR14   | protein_coding |
| 0,9874145 | TTC14    | protein_coding |
| 0,9357407 | MTHFD2L  | protein_coding |
| 0,8269408 | RCHY1    | protein_coding |
| 0,4806087 | GYG1     | protein_coding |
| 0,9379013 | HPS3     | protein_coding |
| 0,4740961 | TM4SF18  | protein_coding |
| 0,8355525 | TOPBP1   | protein_coding |
| 0,9724163 | RYK      | protein_coding |
| 0,5190186 | SNRK     | protein_coding |
| 0,9767278 | SLC4A1AP | protein_coding |
| 0,9828271 | KIAA1143 | protein_coding |
| 0,9484395 | WDR43    | protein_coding |
| 0,654521  | ZDHHC3   | protein_coding |
| 0,3829653 | LZTFL1   | protein_coding |
| 0,8847411 | FYCO1    | protein_coding |

|           |         |                |
|-----------|---------|----------------|
| 0,9233889 | LRRC2   | protein_coding |
| 0,993752  | FBXO40  | protein_coding |
| 0,7611529 | DTX3L   | protein_coding |
| 0,8992483 | ZNF148  | protein_coding |
| 0,5622112 | NMNAT3  | protein_coding |
| 0,0197802 | SMIM12  | protein_coding |
| 0,855954  | ZMYM6   | protein_coding |
| 0,692146  | YEATS2  | protein_coding |
| 0,6116281 | MEAF6   | protein_coding |
| 0,8099847 | SNIP1   | protein_coding |
| 0,9956922 | TMEM41A | protein_coding |
| 0,9077931 | RPN1    | protein_coding |
| 0,860343  | SENP2   | protein_coding |
| 0,6999614 | HEYL    | protein_coding |
| 0,5029234 | IFT122  | protein_coding |
| 0,8683086 | BAP1    | protein_coding |
| 0,8052193 | TKT     | protein_coding |
| 0,9166492 | PRKCD   | protein_coding |
| 0,9828271 | SFMBT1  | protein_coding |
| 0,554581  | GNL3    | protein_coding |
| 0,9781971 | PBRM1   | protein_coding |
| 0,7842706 | TASOR   | protein_coding |
| 0,8992483 | ARHGEF3 | protein_coding |
| 0,7716654 | SLBP    | protein_coding |
| 0,931978  | LRPAP1  | protein_coding |
| 0,5869872 | UBXN7   | protein_coding |
| 0,8875885 | RNF168  | protein_coding |
| 0,7182975 | PIGX    | protein_coding |
| 0,7446613 | AIMP1   | protein_coding |
| 0,62584   | SGMS2   | protein_coding |
| 0,3482281 | METAP1  | protein_coding |
| 0,9803555 | DNAJB14 | protein_coding |
| 0,2026798 | H2AFZ   | protein_coding |
| 0,5265966 | EMCN    | protein_coding |
| 0,9802452 | SLC9B2  | protein_coding |
| 0,6140495 | BDH2    | protein_coding |
| 0,9481776 | PGRMC2  | protein_coding |
| 0,5402971 | ZNF589  | protein_coding |
| 0,8269408 | PLXNB1  | protein_coding |
| 0,8058953 | SHISA5  | protein_coding |
| 0,9705617 | SPRY1   | protein_coding |
| 0,806905  | APEH    | protein_coding |
| 0,9178514 | INTU    | protein_coding |
| 0,9645838 | RNF123  | protein_coding |
| 0,8318664 | HSPA4L  | protein_coding |
| 0,9484395 | MFSD8   | protein_coding |
| 0,7054107 | ABHD18  | protein_coding |
| 0,8554227 | RAD54L2 | protein_coding |
| 0,6462349 | TEX264  | protein_coding |
| 0,8735371 | WDR82   | protein_coding |
| 0,0640162 | PITX2   | protein_coding |
| 0,9496064 | C4orf3  | protein_coding |
| 0,9603194 | HMGB2   | protein_coding |
| 0,8950245 | HAND2   | protein_coding |
| 0,7355147 | ANXA5   | protein_coding |
| 0,9917279 | MAP9    | protein_coding |
| 0,4513092 | GUCY1A1 | protein_coding |
| 0,8885864 | FBXO8   | protein_coding |
| 0,8578622 | CEP44   | protein_coding |

|           |          |                |
|-----------|----------|----------------|
| 0,9145234 | TMEM144  | protein_coding |
| 0,624851  | GASK1B   | protein_coding |
| 0,5159574 | NAA15    | protein_coding |
| 0,3706065 | FAM160A1 | protein_coding |
| 0,9194718 | ARFIP1   | protein_coding |
| 0,9233889 | ICE1     | protein_coding |
| 0,8238032 | ABCE1    | protein_coding |
| 0,8935967 | OTUD4    | protein_coding |
| 0,8624018 | TMEM184C | protein_coding |
| 0,641691  | PRMT9    | protein_coding |
| 0,4141191 | MOCS2    | protein_coding |
| 0,9057039 | EDIL3    | protein_coding |
| 0,7171006 | TMEM161B | protein_coding |
| 0,4599964 | NDUFAF2  | protein_coding |
| 0,6658691 | LMBRD2   | protein_coding |
| 0,7182975 | NIPBL    | protein_coding |
| 0,6607313 | RNF180   | protein_coding |
| 0,7118106 | SLC25A46 | protein_coding |
| 0,9768456 | STARD4   | protein_coding |
| 0,7956173 | PGGT1B   | protein_coding |
| 0,8992483 | ANKRD33B | protein_coding |
| 0,7687197 | CMBL     | protein_coding |
| 0,6778187 | PRRC1    | protein_coding |
| 0,9998538 | AGGF1    | protein_coding |
| 0,887319  | WDR41    | protein_coding |
| 0,3816085 | NDUFS4   | protein_coding |
| 0,0093815 | HTR4     | protein_coding |
| 0,9477953 | GRPEL2   | protein_coding |
| 0,9089634 | RHOBTB3  | protein_coding |
| 0,1611222 | GPX8     | protein_coding |
| 0,8019639 | SERINC5  | protein_coding |
| 0,9998478 | CASP3    | protein_coding |
| 0,9077931 | PRIMPOL  | protein_coding |
| 0,6903585 | ERAP1    | protein_coding |
| 0,9759101 | CMYA5    | protein_coding |
| 0,1412577 | EGFLAM   | protein_coding |
| 0,9068107 | CFAP97   | protein_coding |
| 0,9463928 | RICTOR   | protein_coding |
| 0,9751519 | TENT2    | protein_coding |
| 0,8992483 | EBF1     | protein_coding |
| 0,9998478 | ANKRA2   | protein_coding |
| 0,8851892 | UBLCP1   | protein_coding |
| 0,3327196 | UTP15    | protein_coding |
| 0,9496064 | NSA2     | protein_coding |
| 0,6053653 | GFM2     | protein_coding |
| 0,9484395 | CCDC127  | protein_coding |
| 0,3706065 | SEPTIN8  | protein_coding |
| 0,5879554 | UQCRQ    | protein_coding |
| 0,9802452 | GRIK2    | protein_coding |
| 0,993752  | TXLNB    | protein_coding |
| 0,8500846 | CITED2   | protein_coding |
| 0,998169  | CREBRF   | protein_coding |
| 0,7213265 | SFXN1    | protein_coding |
| 0,7820981 | PDSS2    | protein_coding |
| 0,9439974 | STXBP5   | protein_coding |
| 0,9583708 | PI16     | protein_coding |
| 0,6613817 | TBX20    | protein_coding |
| 0,6807165 | STK17A   | protein_coding |
| 0,7687197 | TRA2A    | protein_coding |



|           |           |                |
|-----------|-----------|----------------|
| 0,7784325 | GALNT10   | protein_coding |
| 0,5964345 | SAP30L    | protein_coding |
| 0,6337897 | RPS14     | protein_coding |
| 0,8209243 | HCN1      | protein_coding |
| 0,330331  | COG5      | protein_coding |
| 0,9616301 | BMT2      | protein_coding |
| 0,8500092 | SLU7      | protein_coding |
| 0,7136899 | RP9       | protein_coding |
| 0,654521  | CAMLG     | protein_coding |
| 0,9281076 | ZNF12     | protein_coding |
| 0,9766993 | CDCA7L    | protein_coding |
| 0,7154026 | MIOS      | protein_coding |
| 0,6613295 | KIAA1324L | protein_coding |
| 0,1528801 | ZNF704    | protein_coding |
| 0,0283162 | FABP5     | protein_coding |
| 0,520999  | COL1A2    | protein_coding |
| 0,7309156 | BRI3      | protein_coding |
| 0,6254273 | LMTK2     | protein_coding |
| 0,1799031 | CTSB      | protein_coding |
| 0,3194617 | DLC1      | protein_coding |
| 0,5267449 | ADCY1     | protein_coding |
| 0,7798822 | PEX2      | protein_coding |
| 0,9705617 | RAD21     | protein_coding |
| 0,9898099 | SPIDR     | protein_coding |
| 0,8745367 | ORC5      | protein_coding |
| 0,2318378 | OSGIN2    | protein_coding |
| 0,9377639 | SUN1      | protein_coding |
| 0,8528913 | OXR1      | protein_coding |
| 0,6549292 | INTS1     | protein_coding |
| 0,7029174 | SLC4A2    | protein_coding |
| 0,8996732 | FASTK     | protein_coding |
| 0,7981341 | PHAX      | protein_coding |
| 0,9804708 | ALDH7A1   | protein_coding |
| 0,6446908 | FOXK1     | protein_coding |
| 0,1523131 | COX6C     | protein_coding |
| 0,9621856 | YWHAZ     | protein_coding |
| 0,8545769 | FZD6      | protein_coding |
| 0,5686994 | DCAF13    | protein_coding |
| 0,7252511 | TP53INP1  | protein_coding |
| 0,8131645 | INTS8     | protein_coding |
| 0,7716654 | VIRMA     | protein_coding |
| 0,5688668 | FREM1     | protein_coding |
| 0,4875875 | GEM       | protein_coding |
| 0,9450135 | PDP1      | protein_coding |
| 0,3089259 | TMEM67    | protein_coding |
| 0,7854018 | WASHC5    | protein_coding |
| 0,9481776 | FAM219A   | protein_coding |
| 0,6491869 | SNAPC3    | protein_coding |
| 0,8183781 | NUDT2     | protein_coding |
| 0,8257564 | TMEM65    | protein_coding |
| 0,6745473 | PSIP1     | protein_coding |
| 0,47585   | CCDC171   | protein_coding |
| 0,5531846 | UBAP1     | protein_coding |
| 0,8850351 | SYK       | protein_coding |
| 0,284683  | NIPSNAP3B | protein_coding |
| 0,5558351 | ABCA1     | protein_coding |
| 0,3640941 | NFIL3     | protein_coding |
| 0,8887908 | METTL2B   | protein_coding |
| 0,3399876 | FXN       | protein_coding |

|           |            |                                    |
|-----------|------------|------------------------------------|
| 0,4179007 | TMEM71     | protein_coding                     |
| 0,2809994 | MAMDC2     | protein_coding                     |
| 0,933129  | ALDH1A1    | protein_coding                     |
| 0,5622112 | KDM1B      | protein_coding                     |
| 0,5510556 | HGSNAT     | protein_coding                     |
| 0,6696502 | GKAP1      | protein_coding                     |
| 0,8019639 | KIF27      | protein_coding                     |
| 0,7271508 | HNRNPK     | protein_coding                     |
| 0,9702772 | AL353743.1 | transcribed_unprocessed_pseudogene |
| 0,5953643 | SVEP1      | protein_coding                     |
| 0,9364287 | TMEM246    | protein_coding                     |
| 0,9334172 | ZHX1       | protein_coding                     |
| 0,6988495 | CYBB       | protein_coding                     |
| 0,9995727 | DYNLT3     | protein_coding                     |
| 0,964785  | SHOC1      | protein_coding                     |
| 0,6613295 | ASB11      | protein_coding                     |
| 0,3801685 | PIGA       | protein_coding                     |
| 0,5964345 | STRBP      | protein_coding                     |
| 0,9481776 | GAPVD1     | protein_coding                     |
| 0,9917279 | WNK2       | protein_coding                     |
| 0,5073158 | ATP7A      | protein_coding                     |
| 0,1225394 | NDUFB6     | protein_coding                     |
| 0,8375248 | AQP7       | protein_coding                     |
| 0,9081173 | NOL6       | protein_coding                     |
| 0,9705617 | VCP        | protein_coding                     |
| 0,8318519 | PIGO       | protein_coding                     |
| 0,3435112 | STOML2     | protein_coding                     |
| 0,8834615 | BRWD3      | protein_coding                     |
| 0,9928407 | OTUD1      | protein_coding                     |
| 0,931978  | ARHGAP12   | protein_coding                     |
| 0,7010516 | HECTD2     | protein_coding                     |
| 0,6316303 | FBXO33     | protein_coding                     |
| 0,6475905 | INTS6L     | protein_coding                     |
| 0,1800952 | SPTSSA     | protein_coding                     |
| 0,887319  | WRN        | protein_coding                     |
| 0,9975676 | MARCH8     | protein_coding                     |
| 0,749866  | CFL2       | protein_coding                     |
| 0,9296784 | SUGT1      | protein_coding                     |
| 0,7161818 | GTF2A1     | protein_coding                     |
| 0,4906292 | ZCCHC24    | protein_coding                     |
| 0,7321942 | PGM2L1     | protein_coding                     |
| 0,6543081 | FOLR2      | protein_coding                     |
| 0,860343  | INPPL1     | protein_coding                     |
| 0,7687197 | CRYL1      | protein_coding                     |
| 0,8330359 | REEP3      | protein_coding                     |
| 0,2231549 | MICU2      | protein_coding                     |
| 0,5777776 | PCF11      | protein_coding                     |
| 0,8155634 | RPL36AL    | protein_coding                     |
| 0,2127154 | DEPP1      | protein_coding                     |
| 0,4806087 | ZNF22      | protein_coding                     |
| 0,5768067 | KLHDC2     | protein_coding                     |
| 0,9275549 | NEMF       | protein_coding                     |
| 0,536593  | RPUSD4     | protein_coding                     |
| 0,9406097 | ARF6       | protein_coding                     |
| 0,4779341 | TTC8       | protein_coding                     |
| 0,9477707 | KBTBD6     | protein_coding                     |
| 0,9792506 | NUDT5      | protein_coding                     |
| 0,9839612 | BEND7      | protein_coding                     |
| 0,1531167 | ATP5F1C    | protein_coding                     |

|           |          |                                    |
|-----------|----------|------------------------------------|
| 0,6591549 | VSTM4    | protein_coding                     |
| 0,240225  | VDAC2    | protein_coding                     |
| 0,9933219 | PDZD8    | protein_coding                     |
| 0,5675917 | ABRAXAS2 | protein_coding                     |
| 0,8500846 | FAM204A  | protein_coding                     |
| 0,9484395 | NSD1     | protein_coding                     |
| 0,5060008 | PRDX3    | protein_coding                     |
| 0,8622295 | ENOX2    | protein_coding                     |
| 0,5122163 | GHITM    | protein_coding                     |
| 0,9516698 | PMPCA    | protein_coding                     |
| 0,9074092 | TSC1     | protein_coding                     |
| 0,9332245 | HPRT1    | protein_coding                     |
| 0,9081173 | BORCS5   | protein_coding                     |
| 0,5343413 | DDX21    | protein_coding                     |
| 0,6613295 | BMS1     | protein_coding                     |
| 0,7985809 | JCAD     | protein_coding                     |
| 0,1431468 | FUNDC2   | protein_coding                     |
| 0,624851  | METTL17  | protein_coding                     |
| 0,6425736 | NDRG2    | protein_coding                     |
| 0,5185243 | ARHGEF40 | protein_coding                     |
| 0,6776791 | CASP7    | protein_coding                     |
| 0,8563699 | BTNL9    | protein_coding                     |
| 0,9731251 | CCDC186  | protein_coding                     |
| 0,9176584 | METTL3   | protein_coding                     |
| 0,9528743 | TRUB1    | protein_coding                     |
| 0,6516554 | ZFYVE1   | protein_coding                     |
| 0,8440006 | HSPA12A  | protein_coding                     |
| 0,4638153 | SHLD2P1  | transcribed_unprocessed_pseudogene |
| 0,8530643 | ARHGAP42 | protein_coding                     |
| 0,9562513 | ISCA2    | protein_coding                     |
| 0,9463928 | OTOGL    | protein_coding                     |
| 0,8274546 | PACSIN3  | protein_coding                     |
| 0,9839612 | TTC7B    | protein_coding                     |
| 0,6313749 | PSMC3    | protein_coding                     |
| 0,6999614 | TC2N     | protein_coding                     |
| 0,9137326 | CPSF2    | protein_coding                     |
| 0,2971084 | MOAP1    | protein_coding                     |
| 0,7816267 | IFI27    | protein_coding                     |
| 0,520749  | CLMN     | protein_coding                     |
| 0,3749466 | PTER     | protein_coding                     |
| 0,3640941 | CACNB2   | protein_coding                     |
| 0,4724079 | HACD1    | protein_coding                     |
| 0,9136442 | ARL5B    | protein_coding                     |
| 0,7842706 | CEP295   | protein_coding                     |
| 0,9345529 | TAF1D    | protein_coding                     |
| 0,895571  | ABTB2    | protein_coding                     |
| 0,9880319 | R3HCC1L  | protein_coding                     |
| 0,7858129 | AMOTL1   | protein_coding                     |
| 0,0606893 | HTRA1    | protein_coding                     |
| 0,8386162 | CEP57    | protein_coding                     |
| 0,9033043 | TCP11L2  | protein_coding                     |
| 0,7611529 | SPRED1   | protein_coding                     |
| 0,7125689 | JAM3     | protein_coding                     |
| 0,1284788 | CMTM5    | protein_coding                     |
| 0,4806087 | ADAMTS15 | protein_coding                     |
| 0,3803906 | GPT2     | protein_coding                     |
| 0,9282881 | RAB8B    | protein_coding                     |
| 0,913228  | HIF1AN   | protein_coding                     |
| 0,3944312 | NDUFB8   | protein_coding                     |

|           |          |                        |
|-----------|----------|------------------------|
| 0,9364287 | FBN1     | protein_coding         |
| 0,887319  | BRD7     | protein_coding         |
| 0,6315698 | CKB      | protein_coding         |
| 0,6238595 | BTRC     | protein_coding         |
| 0,8997937 | BAG5     | protein_coding         |
| 0,2354584 | LARP6    | protein_coding         |
| 0,9336853 | API5     | protein_coding         |
| 0,9423015 | NOLC1    | protein_coding         |
| 0,692146  | ALKBH3   | protein_coding         |
| 0,6961817 | COPS2    | protein_coding         |
| 0,0920491 | GABRB3   | protein_coding         |
| 0,9792506 | SGPL1    | protein_coding         |
| 0,8930787 | FRS2     | protein_coding         |
| 0,4847278 | CCT2     | protein_coding         |
| 0,7162408 | PCBD1    | protein_coding         |
| 0,9802452 | ARIH1    | protein_coding         |
| 0,7395968 | CLMP     | protein_coding         |
| 0,7915526 | COX11    | protein_coding         |
| 0,817424  | STXBP4   | protein_coding         |
| 0,2104415 | CYYR1    | protein_coding         |
| 0,6999614 | CUL5     | protein_coding         |
| 0,7182975 | WBPI1    | protein_coding         |
| 0,9551108 | BORCS7   | protein_coding         |
| 0,4161706 | ANAPC16  | protein_coding         |
| 0,7211115 | SMPD1    | protein_coding         |
| 0,7558125 | APBB1    | protein_coding         |
| 0,7842247 | SYNPO2L  | protein_coding         |
| 0,7213265 | TRIM44   | protein_coding         |
| 0,645515  | TPP1     | protein_coding         |
| 0,611428  | DCHS1    | protein_coding         |
| 0,7506449 | CYB5A    | protein_coding         |
| 0,8575378 | USP54    | protein_coding         |
| 0,3113413 | C11orf74 | protein_coding         |
| 0,6757338 | ATP9B    | protein_coding         |
| 0,8890235 | PPFIBP2  | protein_coding         |
| 0,9334172 | KIAA0355 | protein_coding         |
| 0,8850351 | TUB      | protein_coding         |
| 0,7395905 | RIC3     | protein_coding         |
| 0,4998506 | IDH3A    | protein_coding         |
| 0,3472571 | ZMAT1    | protein_coding         |
| 0,624851  | XRRA1    | protein_coding         |
| 0,7010516 | RNF169   | protein_coding         |
| 0,8062191 | RPL27A   | protein_coding         |
| 0,8373584 | ST5      | protein_coding         |
| 0,5062136 | ATMIN    | protein_coding         |
| 0,9603194 | TMEM41B  | protein_coding         |
| 0,7968733 | PKD1L2   | polymorphic_pseudogene |
| 0,8711676 | LEO1     | protein_coding         |
| 0,4750209 | ZNF143   | protein_coding         |
| 0,8189129 | TMX3     | protein_coding         |
| 0,5675917 | MFAP4    | protein_coding         |
| 0,7607016 | WEE1     | protein_coding         |
| 0,9729242 | HDGFL3   | protein_coding         |
| 0,7213265 | MCM7     | protein_coding         |
| 0,8578793 | CCDC68   | protein_coding         |
| 0,868018  | ZNF3     | protein_coding         |
| 0,8373584 | RIMKLB   | protein_coding         |
| 0,2833432 | TK2      | protein_coding         |
| 0,9248086 | TMED3    | protein_coding         |

|           |            |                |
|-----------|------------|----------------|
| 0,7235397 | SEC11C     | protein_coding |
| 0,7816267 | TMEM135    | protein_coding |
| 0,9917279 | NDEL1      | protein_coding |
| 0,903318  | RRAD       | protein_coding |
| 0,5558351 | CIAO2B     | protein_coding |
| 0,7842247 | HSP90B1    | protein_coding |
| 0,583239  | BLCAP      | protein_coding |
| 0,9087161 | ATF7IP2    | protein_coding |
| 0,396339  | BEX3       | protein_coding |
| 0,8519625 | COG1       | protein_coding |
| 0,8198317 | PLEKHA7    | protein_coding |
| 0,9759101 | ZNF606     | protein_coding |
| 0,9358987 | B2M        | protein_coding |
| 0,7464528 | ZNF592     | protein_coding |
| 0,3765746 | CASC4      | protein_coding |
| 0,7744911 | NNMT       | protein_coding |
| 0,9973317 | APIG1      | protein_coding |
| 0,6796756 | SLFN5      | protein_coding |
| 0,7444016 | ZNF667-AS1 | lncRNA         |
| 0,8003414 | BMERB1     | protein_coding |
| 0,64053   | MARF1      | protein_coding |
| 0,8930787 | PPIB       | protein_coding |
| 0,3089259 | CIAO2A     | protein_coding |
| 0,9484395 | FAM111A    | protein_coding |
| 0,9350074 | LDHD       | protein_coding |
| 0,5735514 | PLIN1      | protein_coding |
| 0,5565876 | TMEM170A   | protein_coding |
| 0,5029234 | RBPMS2     | protein_coding |
| 0,5375314 | NAV2       | protein_coding |
| 0,9759101 | DCTN5      | protein_coding |
| 0,0731855 | TERF2IP    | protein_coding |
| 0,8019639 | CLPX       | protein_coding |
| 0,391877  | NEMP1      | protein_coding |
| 0,654521  | VPS39      | protein_coding |
| 0,7296863 | STAT6      | protein_coding |
| 0,933129  | PATL1      | protein_coding |
| 0,7611529 | STX3       | protein_coding |
| 0,3872426 | MRPL16     | protein_coding |
| 0,8996732 | PIP4K2C    | protein_coding |
| 0,6563172 | MTMR10     | protein_coding |
| 0,8721867 | YWHAB      | protein_coding |
| 0,9484395 | MS4A7      | protein_coding |
| 0,997931  | DIS3L      | protein_coding |
| 0,4638153 | CCNDBP1    | protein_coding |
| 0,5051303 | SMAD3      | protein_coding |
| 0,9609096 | MAP1A      | protein_coding |
| 0,0386353 | AKTIP      | protein_coding |
| 0,7558125 | MAPRE2     | protein_coding |
| 0,4165098 | EVA1C      | protein_coding |
| 0,6591549 | MARS       | protein_coding |
| 0,9738194 | PDIA3      | protein_coding |
| 0,8801863 | NUDT21     | protein_coding |
| 0,855954  | SGSM1      | protein_coding |
| 0,0385201 | TEF        | protein_coding |
| 0,9925374 | PBX3       | protein_coding |
| 0,3653941 | PHB        | protein_coding |
| 0,3078991 | SNRPD1     | protein_coding |
| 0,8447416 | ACSF2      | protein_coding |
| 0,487229  | GOLGA2     | protein_coding |

|           |          |                |
|-----------|----------|----------------|
| 0,8788037 | TRUB2    | protein_coding |
| 0,8034097 | COQ4     | protein_coding |
| 0,7880474 | URM1     | protein_coding |
| 0,8258095 | COQ7     | protein_coding |
| 0,928336  | GPRC5B   | protein_coding |
| 0,6613295 | CRK      | protein_coding |
| 0,7085673 | FBXO22   | protein_coding |
| 0,3830886 | TBC1D2B  | protein_coding |
| 0,9908068 | ZNF91    | protein_coding |
| 0,8091803 | RNF214   | protein_coding |
| 0,9694578 | CDK12    | protein_coding |
| 0,9998538 | POP5     | protein_coding |
| 0,4806087 | ATP5MG   | protein_coding |
| 0,9205351 | TBC1D16  | protein_coding |
| 0,2440238 | MYO5B    | protein_coding |
| 0,7154026 | ACAA2    | protein_coding |
| 0,9925374 | STIM1    | protein_coding |
| 0,8318538 | RRM1     | protein_coding |
| 0,8969303 | IRGQ     | protein_coding |
| 0,9528743 | ZNF226   | protein_coding |
| 0,9804708 | ZNF180   | protein_coding |
| 0,7984578 | PPP2R3B  | protein_coding |
| 0,9496064 | SMG8     | protein_coding |
| 0,7320389 | TPM4     | protein_coding |
| 0,8930787 | GPX4     | protein_coding |
| 0,9356153 | MIDN     | protein_coding |
| 0,9912461 | GATAD2A  | protein_coding |
| 0,6854132 | TRAPPC2L | protein_coding |
| 0,8992483 | ANKRD11  | protein_coding |
| 0,5474737 | RPL13    | protein_coding |
| 0,7980625 | ZNF641   | protein_coding |
| 0,8622295 | KMT2D    | protein_coding |
| 0,9817008 | CORO6    | protein_coding |
| 0,7160987 | TUBA1A   | protein_coding |
| 0,5293665 | TUBA1C   | protein_coding |
| 0,9450135 | ZNF528   | protein_coding |
| 0,9933219 | ZNF701   | protein_coding |
| 0,7854018 | SERTAD3  | protein_coding |
| 0,6824068 | GPD1     | protein_coding |
| 0,999806  | AXL      | protein_coding |
| 0,9693586 | LAIR1    | protein_coding |
| 0,4894579 | LENG8    | protein_coding |
| 0,9922688 | TRAPPC9  | protein_coding |
| 0,809839  | ZNF146   | protein_coding |
| 0,9441647 | ZNF283   | protein_coding |
| 0,6776989 | DAPK3    | protein_coding |
| 0,2841212 | EEF2     | protein_coding |
| 0,8330359 | UBXN6    | protein_coding |
| 0,5062136 | PLIN4    | protein_coding |
| 0,9270004 | GLOD4    | protein_coding |
| 0,9450135 | TSR1     | protein_coding |
| 0,3803906 | ZNF83    | protein_coding |
| 0,8682129 | OTUB1    | protein_coding |
| 0,5249842 | SPRYD3   | protein_coding |
| 0,6238595 | IGFBP6   | protein_coding |
| 0,9998478 | ZNF558   | protein_coding |
| 0,8823913 | NDUFV1   | protein_coding |
| 0,7045706 | PRDX2    | protein_coding |
| 0,7876407 | MIS12    | protein_coding |

|           |           |                                |
|-----------|-----------|--------------------------------|
| 0,1872671 | MRPL58    | protein_coding                 |
| 0,3803906 | ATP5PD    | protein_coding                 |
| 0,878778  | SRP68     | protein_coding                 |
| 0,8373584 | TMEM68    | protein_coding                 |
| 0,5558351 | FAM234A   | protein_coding                 |
| 0,6383874 | ECI1      | protein_coding                 |
| 0,9357394 | SRRM2     | protein_coding                 |
| 0,5812017 | DDB1      | protein_coding                 |
| 0,8888699 | FTH1      | protein_coding                 |
| 0,749866  | POLR2G    | protein_coding                 |
| 0,9998538 | SLC3A2    | protein_coding                 |
| 0,9725101 | C2CD3     | protein_coding                 |
| 0,1974243 | TRANK1    | protein_coding                 |
| 0,7984578 | RPSA      | protein_coding                 |
| 0,8108219 | CTNNB1    | protein_coding                 |
| 0,0419898 | ULK4      | protein_coding                 |
| 0,271425  | LTBP3     | protein_coding                 |
| 0,9628671 | SF1       | protein_coding                 |
| 0,2506935 | SCARA5    | protein_coding                 |
| 0,5537635 | COPS6     | protein_coding                 |
| 0,9069111 | PAFAH1B2  | protein_coding                 |
| 0,9366634 | KIAA1586  | protein_coding                 |
| 0,3953518 | RAB4A     | protein_coding                 |
| 0,9967216 | SETD5     | protein_coding                 |
| 0,8373584 | THAP9     | protein_coding                 |
| 0,9998478 | RNF187    | protein_coding                 |
| 0,3466656 | HOOK3     | protein_coding                 |
| 0,9296784 | MAPK1IP1L | protein_coding                 |
| 0,3881918 | RBPJ      | protein_coding                 |
| 0,9253623 | LMBRD1    | protein_coding                 |
| 0,8578622 | ZCCHC4    | protein_coding                 |
| 0,4835164 | TTC39C    | protein_coding                 |
| 0,624851  | UBTD2     | protein_coding                 |
| 0,6929857 | NKIRAS2   | protein_coding                 |
| 0,3881918 | DNAJC7    | protein_coding                 |
| 0,3517736 | IRF2BP2   | protein_coding                 |
| 0,195587  | NT5DC2    | protein_coding                 |
| 0,4160411 | SMIM4     | protein_coding                 |
| 0,7823793 | BMI1      | protein_coding                 |
| 0,7490465 | THAP11    | protein_coding                 |
| 0,5245497 | MMADHC    | protein_coding                 |
| 0,3177457 | PDHB      | protein_coding                 |
| 0,2945575 | PXK       | protein_coding                 |
| 0,9363291 | HIST1H1E  | protein_coding                 |
| 0,8992483 | PCMTD1    | protein_coding                 |
| 0,8882787 | MPLKIP    | protein_coding                 |
| 0,997931  | ACOX2     | protein_coding                 |
| 0,1356666 | FAM107A   | protein_coding                 |
| 0,7871131 | IRF2      | protein_coding                 |
| 0,9233889 | XIRP1     | protein_coding                 |
| 0,5011485 | ARF4      | protein_coding                 |
| 0,3508112 | SEPTIN2   | protein_coding                 |
| 0,3715255 | FILIP1L   | protein_coding                 |
| 0,8463447 | TAP1      | protein_coding                 |
| 0,8992483 | ING5      | protein_coding                 |
| 0,9572126 | ATG4B     | protein_coding                 |
| 0,9248086 | CMAHP     | transcribed_unitary_pseudogene |
| 0,5011485 | RFWD3     | protein_coding                 |
| 0,4848639 | COG7      | protein_coding                 |

|           |          |                |
|-----------|----------|----------------|
| 0,853092  | CDC40    | protein_coding |
| 0,3202177 | STIP1    | protein_coding |
| 0,2945575 | RAB31    | protein_coding |
| 0,8099847 | TNXB     | protein_coding |
| 0,8836774 | ATXN2L   | protein_coding |
| 0,9033043 | POLR3D   | protein_coding |
| 0,9894339 | CAVIN2   | protein_coding |
| 0,5011485 | HJV      | protein_coding |
| 0,696332  | FNTA     | protein_coding |
| 0,9933219 | TRAPPC11 | protein_coding |
| 0,2945575 | COL3A1   | protein_coding |
| 0,8373584 | CDKN2AIP | protein_coding |
| 0,8118765 | SNRNP48  | protein_coding |
| 0,887319  | SLC20A2  | protein_coding |
| 0,981857  | TMUB2    | protein_coding |
| 0,5879554 | STAT3    | protein_coding |
| 0,864196  | ADAM9    | protein_coding |
| 0,1933793 | NDUFS5   | protein_coding |
| 0,3881918 | LRATD2   | protein_coding |
| 0,9954421 | LDLRAD4  | protein_coding |
| 0,5558351 | SLC16A4  | protein_coding |
| 0,1501348 | LRP1B    | protein_coding |
| 0,6613295 | AHCYL1   | protein_coding |
| 0,1129731 | DNAJC21  | protein_coding |
| 0,7968733 | PKIG     | protein_coding |
| 0,4835164 | SEMA4C   | protein_coding |
| 0,5964345 | CNNM3    | protein_coding |
| 0,2318378 | GSTM4    | protein_coding |
| 0,4467509 | TET2     | protein_coding |
| 0,5879554 | PPIP5K1  | protein_coding |
| 0,6232451 | ZBTB5    | protein_coding |
| 0,5660793 | ADAL     | protein_coding |
| 0,504498  | SNTB2    | protein_coding |
| 0,7444016 | ZNF507   | protein_coding |
| 0,8318519 | STX18    | protein_coding |
| 0,5890453 | GFM1     | protein_coding |
| 0,4761054 | ATOH8    | protein_coding |
| 0,9535559 | USP39    | protein_coding |
| 0,9572126 | C2orf68  | protein_coding |
| 0,8869707 | RNF181   | protein_coding |
| 0,7467854 | LRRC28   | protein_coding |
| 0,7213265 | MAT2A    | protein_coding |
| 0,7558125 | ZNF608   | protein_coding |
| 0,6613295 | INPP5D   | protein_coding |
| 0,9248086 | LETM1    | protein_coding |
| 0,8232467 | TMEM129  | protein_coding |
| 0,1821534 | PPIC     | protein_coding |
| 0,5420087 | CEP120   | protein_coding |
| 0,1528801 | STXBP6   | protein_coding |
| 0,2841212 | MFF      | protein_coding |
| 0,9182782 | PXDC1    | protein_coding |
| 0,9484395 | E2F6     | protein_coding |
| 0,5558351 | FEM1B    | protein_coding |
| 0,9670595 | COMMD8   | protein_coding |
| 0,2819771 | ATP5ME   | protein_coding |
| 0,1382998 | UQCRCF1  | protein_coding |
| 0,933129  | COL4A3   | protein_coding |
| 0,8623038 | MAP2K1   | protein_coding |
| 0,9127443 | HNRNPH1  | protein_coding |



|           |          |                |
|-----------|----------|----------------|
| 0,7087026 | IRS1     | protein_coding |
| 0,8930787 | MECP2    | protein_coding |
| 0,5879554 | UPF3A    | protein_coding |
| 0,8818298 | AR       | protein_coding |
| 0,4986683 | DHRSX    | protein_coding |
| 0,9068107 | HSPBAP1  | protein_coding |
| 0,4775021 | SLC25A6  | protein_coding |
| 0,7834554 | PARM1    | protein_coding |
| 0,5675917 | CSNK1G1  | protein_coding |
| 0,7774855 | FAM110B  | protein_coding |
| 0,8238032 | UBE2V2   | protein_coding |
| 0,7712396 | ZBTB43   | protein_coding |
| 0,9233889 | XPO6     | protein_coding |
| 0,9533676 | MN1      | protein_coding |
| 0,5590581 | NSMCE1   | protein_coding |
| 0,9678404 | CCDC126  | protein_coding |
| 0,9709611 | NPIP12   | protein_coding |
| 0,7321942 | CD2BP2   | protein_coding |
| 0,9998538 | LMAN2    | protein_coding |
| 0,3358601 | THBS3    | protein_coding |
| 0,8976077 | CA5B     | protein_coding |
| 0,290302  | EFNA1    | protein_coding |
| 0,9808899 | NPIP3    | protein_coding |
| 0,7558125 | SH3TC2   | protein_coding |
| 0,7834471 | NMD3     | protein_coding |
| 0,620901  | B3GALNT1 | protein_coding |
| 0,3398681 | HSPB3    | protein_coding |
| 0,9233889 | KCNAB1   | protein_coding |
| 0,3697716 | MRPL1    | protein_coding |
| 0,7805908 | SHE      | protein_coding |
| 0,7296863 | PGM2     | protein_coding |
| 0,8862542 | SLC33A1  | protein_coding |
| 0,505053  | CRADD    | protein_coding |
| 0,6734328 | SIN3A    | protein_coding |
| 0,6613295 | ARL13B   | protein_coding |
| 0,9148394 | PTK2     | protein_coding |
| 0,6729908 | PTPN9    | protein_coding |
| 0,8281575 | NPR1     | protein_coding |
| 0,140122  | SCN9A    | protein_coding |
| 0,9082846 | SDC2     | protein_coding |
| 0,8919058 | MMGT1    | protein_coding |
| 0,6160654 | TM2D2    | protein_coding |
| 0,9666028 | PLEKHA2  | protein_coding |
| 0,4835164 | CLIC4    | protein_coding |
| 0,8422988 | GPR183   | protein_coding |
| 0,4933085 | CCDC8    | protein_coding |
| 0,9082846 | METTL15  | protein_coding |
| 0,9360637 | ZEB2     | protein_coding |
| 0,1763931 | HINT1    | protein_coding |
| 0,9074092 | DTWD2    | protein_coding |
| 0,2841212 | NFU1     | protein_coding |
| 0,1712026 | ANTXR1   | protein_coding |
| 0,9644268 | C15orf40 | protein_coding |
| 0,615864  | RAMAC    | protein_coding |
| 0,4806087 | APLF     | protein_coding |
| 0,9126716 | RGPD8    | protein_coding |
| 0,6003589 | LUZP1    | protein_coding |
| 0,9874145 | AGPAT2   | protein_coding |
| 0,6059512 | FASN     | protein_coding |

|           |            |                                    |
|-----------|------------|------------------------------------|
| 0,6613817 | CNBP       | protein_coding                     |
| 0,9998478 | MT1E       | protein_coding                     |
| 0,9879323 | GPS1       | protein_coding                     |
| 0,7296863 | DCXR       | protein_coding                     |
| 0,3269911 | ZNF32      | protein_coding                     |
| 0,8885864 | LDB2       | protein_coding                     |
| 0,7321942 | LIMS1      | protein_coding                     |
| 0,7558125 | TAPT1      | protein_coding                     |
| 0,4835164 | UGP2       | protein_coding                     |
| 0,8930787 | HNRNPF     | protein_coding                     |
| 0,6776791 | BTD        | protein_coding                     |
| 0,8238032 | CSGALNACT2 | protein_coding                     |
| 0,0998266 | ROBO1      | protein_coding                     |
| 0,2499691 | AVEN       | protein_coding                     |
| 0,9933219 | CTNND2     | protein_coding                     |
| 0,6574161 | TRIM56     | protein_coding                     |
| 0,060478  | REPS2      | protein_coding                     |
| 0,99743   | SYAP1      | protein_coding                     |
| 0,3606951 | ITGAM      | protein_coding                     |
| 0,645515  | TPST1      | protein_coding                     |
| 0,6244656 | TOR1AIP2   | protein_coding                     |
| 0,4799252 | TM4SF1     | protein_coding                     |
| 0,9670362 | OTUD3      | protein_coding                     |
| 0,8500846 | GUSB       | protein_coding                     |
| 0,5558351 | BRD3       | protein_coding                     |
| 0,9251589 | KLF13      | protein_coding                     |
| 0,3607643 | ZFPM2      | protein_coding                     |
| 0,6828036 | MAP3K2     | protein_coding                     |
| 0,5799813 | SF3B5      | protein_coding                     |
| 0,5222808 | ZNF35      | protein_coding                     |
| 0,855954  | CHD3       | protein_coding                     |
| 0,9729242 | ALCAM      | protein_coding                     |
| 0,9975676 | YWHAG      | protein_coding                     |
| 0,3847557 | UBE2E3     | protein_coding                     |
| 0,8869707 | TMEM192    | protein_coding                     |
| 0,6607313 | AC106795.1 | transcribed_unprocessed_pseudogene |
| 0,9112805 | ZNF778     | protein_coding                     |
| 0,8269408 | NIPA1      | protein_coding                     |
| 0,730165  | UBE2E1     | protein_coding                     |
| 0,949756  | HNRNPA3    | protein_coding                     |
| 0,8786805 | SIK2       | protein_coding                     |
| 0,7954765 | RNF150     | protein_coding                     |
| 0,4818782 | USP38      | protein_coding                     |
| 0,7785964 | PWWP2A     | protein_coding                     |
| 0,8683086 | USP47      | protein_coding                     |
| 0,9928407 | PDCD6IP    | protein_coding                     |
| 0,9908528 | GLB1       | protein_coding                     |
| 0,2104415 | FAXDC2     | protein_coding                     |
| 0,2146641 | CRTAP      | protein_coding                     |
| 0,9296784 | SLN        | protein_coding                     |
| 0,8324496 | ELP5       | protein_coding                     |
| 0,5688668 | STX8       | protein_coding                     |
| 0,9951314 | UBB        | protein_coding                     |
| 0,489407  | NFRKB      | protein_coding                     |
| 0,9976097 | FABP4      | protein_coding                     |
| 0,7985809 | B3GNT2     | protein_coding                     |
| 0,3358222 | FOS        | protein_coding                     |
| 0,9933219 | TMED10     | protein_coding                     |
| 0,7531077 | SETMAR     | protein_coding                     |

|           |           |                                    |
|-----------|-----------|------------------------------------|
| 0,9998538 | SMAD1     | protein_coding                     |
| 0,4260926 | SLC30A1   | protein_coding                     |
| 0,9245441 | DCLK2     | protein_coding                     |
| 0,7546576 | TMEM182   | protein_coding                     |
| 0,9956922 | KRT8      | protein_coding                     |
| 0,0727176 | METTL7B   | protein_coding                     |
| 0,7968733 | HARS      | protein_coding                     |
| 0,0390866 | NFXL1     | protein_coding                     |
| 0,9700639 | DENND5B   | protein_coding                     |
| 0,5879554 | CD14      | protein_coding                     |
| 0,6591127 | DNAJC18   | protein_coding                     |
| 0,9998478 | RALGAPB   | protein_coding                     |
| 0,4344705 | NPAS2     | protein_coding                     |
| 0,6903497 | LONRF2    | protein_coding                     |
| 0,6244656 | NUDT9     | protein_coding                     |
| 0,6888062 | PA2G4     | protein_coding                     |
| 0,9868416 | PFKFB3    | protein_coding                     |
| 0,6371005 | ARL6IP1   | protein_coding                     |
| 0,4467509 | SERPINB9  | protein_coding                     |
| 0,6098976 | CDH2      | protein_coding                     |
| 0,7258655 | EMB       | protein_coding                     |
| 0,4151093 | STAT2     | protein_coding                     |
| 0,9572126 | NUDCD2    | protein_coding                     |
| 0,9925374 | HSPA4     | protein_coding                     |
| 0,9378903 | SGCD      | protein_coding                     |
| 0,8176511 | DPY19L2P2 | transcribed_unprocessed_pseudogene |
| 0,427478  | ARMC10    | protein_coding                     |
| 0,7823793 | RNF34     | protein_coding                     |
| 0,8373584 | ACYP2     | protein_coding                     |
| 0,8992483 | ATF7      | protein_coding                     |
| 0,6088362 | RASA4B    | protein_coding                     |
| 0,6217281 | SOCS6     | protein_coding                     |
| 0,8455757 | CAVIN4    | protein_coding                     |
| 0,9581117 | KIF5B     | protein_coding                     |
| 0,9540553 | AKAP13    | protein_coding                     |
| 0,5911872 | CHCHD7    | protein_coding                     |
| 0,9481776 | HTRA3     | protein_coding                     |
| 0,6383874 | FOXN2     | protein_coding                     |
| 0,8992483 | LMOD2     | protein_coding                     |
| 0,8189129 | USP32     | protein_coding                     |
| 0,904174  | PPM1D     | protein_coding                     |
| 0,8318664 | KBTBD2    | protein_coding                     |
| 0,5175488 | RIOX2     | protein_coding                     |
| 0,5485366 | LSM3      | protein_coding                     |
| 0,645515  | KIAA0232  | protein_coding                     |
| 0,5445815 | MTSS1     | protein_coding                     |
| 0,4464427 | TMEM43    | protein_coding                     |
| 0,9641192 | RNF139    | protein_coding                     |
| 0,6347101 | RPS9      | protein_coding                     |
| 0,7740102 | GSTA4     | protein_coding                     |
| 0,6160654 | MSANTD4   | protein_coding                     |
| 0,7211115 | NDUFA3    | protein_coding                     |
| 0,749866  | TPT1-AS1  | lncRNA                             |
| 0,6604792 | TANC2     | protein_coding                     |
| 0,9528743 | DNAJC24   | protein_coding                     |
| 0,7724125 | ZNF160    | protein_coding                     |
| 0,6988495 | ZNF415    | protein_coding                     |
| 0,2809994 | HAS2      | protein_coding                     |
| 0,124191  | PDGFD     | protein_coding                     |

|           |           |                |
|-----------|-----------|----------------|
| 0,5456715 | S1PR1     | protein_coding |
| 0,8295224 | PYGO1     | protein_coding |
| 0,9860501 | PKIA      | protein_coding |
| 0,5265966 | FEZ2      | protein_coding |
| 0,8825313 | MTM1      | protein_coding |
| 0,9210173 | INSR      | protein_coding |
| 0,4032255 | MFN1      | protein_coding |
| 0,9277595 | GIMAP8    | protein_coding |
| 0,9860501 | ATP6V0E2  | protein_coding |
| 0,5140003 | PRKCE     | protein_coding |
| 0,6835119 | JAGN1     | protein_coding |
| 0,9154352 | TADA3     | protein_coding |
| 0,645515  | SOCS5     | protein_coding |
| 0,5029234 | C1GALT1C1 | protein_coding |
| 0,6157478 | ZNF672    | protein_coding |
| 0,2080886 | TMEM126A  | protein_coding |
| 0,3697716 | TMEM126B  | protein_coding |
| 0,922549  | TRIM8     | protein_coding |
| 0,6835435 | JUNB      | protein_coding |
| 0,5880659 | FAM98B    | protein_coding |
| 0,8219774 | ZNF439    | protein_coding |
| 0,9528743 | ZNF440    | protein_coding |
| 0,9928407 | CANT1     | protein_coding |
| 0,2169157 | KCNK3     | protein_coding |
| 0,4810647 | ZDHHC16   | protein_coding |
| 0,9625751 | CHST11    | protein_coding |
| 0,7740102 | EXOSC1    | protein_coding |
| 0,99108   | PGAM1     | protein_coding |
| 0,646339  | CHD7      | protein_coding |
| 0,9074092 | CLCN5     | protein_coding |
| 0,4954628 | KCND3     | protein_coding |
| 0,654521  | PDE7B     | protein_coding |
| 0,6203109 | MCC       | protein_coding |
| 0,8274546 | ZBTB26    | protein_coding |
| 0,7713242 | DSEL      | protein_coding |
| 0,9914435 | ASXL1     | protein_coding |
| 0,9840915 | ZNF562    | protein_coding |
| 0,8185595 | ZNF318    | protein_coding |
| 0,7740102 | ZNF561    | protein_coding |
| 0,5848767 | WIPF2     | protein_coding |
| 0,7936863 | LRRC8C    | protein_coding |
| 0,8189129 | RSL1D1    | protein_coding |
| 0,654521  | LRRC8D    | protein_coding |
| 0,6383874 | PPID      | protein_coding |
| 0,4765298 | ETFDH     | protein_coding |
| 0,3679769 | LPAR3     | protein_coding |
| 0,7558125 | TBCA      | protein_coding |
| 0,9767278 | BCL2L1    | protein_coding |
| 0,8117718 | PLRG1     | protein_coding |
| 0,7558125 | CLSTN1    | protein_coding |
| 0,6662761 | CXXC5     | protein_coding |
| 0,8875885 | ZNF274    | protein_coding |
| 0,8062191 | SLC25A33  | protein_coding |
| 0,9484395 | ENC1      | protein_coding |
| 0,1067405 | SPSB1     | protein_coding |
| 0,7558125 | BPTF      | protein_coding |
| 0,7456366 | GPR34     | protein_coding |
| 0,6310261 | ATF7IP    | protein_coding |
| 0,9769756 | ANO5      | protein_coding |

|           |           |                |
|-----------|-----------|----------------|
| 0,8258095 | HDAC3     | protein_coding |
| 0,8381556 | GPHN      | protein_coding |
| 0,115935  | VATIL     | protein_coding |
| 0,5313262 | CAMTA1    | protein_coding |
| 0,1712026 | GATM      | protein_coding |
| 0,9182782 | BCL2      | protein_coding |
| 0,7915374 | CTPS1     | protein_coding |
| 0,9781971 | ZNF540    | protein_coding |
| 0,9998478 | EXOSC10   | protein_coding |
| 0,7576959 | ZNF570    | protein_coding |
| 0,8111745 | MLLT3     | protein_coding |
| 0,624851  | TRAPPC12  | protein_coding |
| 0,4894579 | RPS21     | protein_coding |
| 0,6285359 | C3AR1     | protein_coding |
| 0,9774667 | PTEN      | protein_coding |
| 0,997931  | RPS7      | protein_coding |
| 0,7545035 | RNASEH1   | protein_coding |
| 0,654521  | PRNP      | protein_coding |
| 0,8466046 | FRMD5     | protein_coding |
| 0,9074092 | TLN2      | protein_coding |
| 0,9248086 | TVP23B    | protein_coding |
| 0,8087971 | ZNF217    | protein_coding |
| 0,6199446 | SRGAP2C   | protein_coding |
| 0,934719  | JMJD1C    | protein_coding |
| 0,9700303 | SYNPO     | protein_coding |
| 0,6785825 | RAB33B    | protein_coding |
| 0,7385573 | ANKRD20A4 | protein_coding |
| 0,5355129 | LAMB2     | protein_coding |
| 0,6254273 | USP19     | protein_coding |
| 0,6903585 | QARS      | protein_coding |
| 0,2073391 | ORMDL3    | protein_coding |
| 0,5166442 | SERF1A    | protein_coding |
| 0,3316892 | KLF11     | protein_coding |
| 0,4999985 | SMN1      | protein_coding |
| 0,6867028 | EIF2AK3   | protein_coding |
| 0,7518452 | KRCC1     | protein_coding |
| 0,6867028 | NME6      | protein_coding |
| 0,3792977 | CYCS      | protein_coding |
| 0,7913684 | FRMD3     | protein_coding |
| 0,7885463 | SNTB1     | protein_coding |
| 0,2945575 | MRPL13    | protein_coding |
| 0,8912998 | MALT1     | protein_coding |
| 0,9296784 | MBOAT1    | protein_coding |
| 0,0088417 | ID4       | protein_coding |
| 0,9839612 | GPR22     | protein_coding |
| 0,6543081 | CEBPB     | protein_coding |
| 0,7355144 | PAIP1     | protein_coding |
| 0,7253153 | NEGR1     | protein_coding |
| 0,9670362 | ZNF131    | protein_coding |
| 0,9709611 | BSG       | protein_coding |
| 0,6762366 | CERS6     | protein_coding |
| 0,9450135 | SPTLC3    | protein_coding |
| 0,7834471 | COPRS     | protein_coding |
| 0,8330596 | TP53RK    | protein_coding |
| 0,4362639 | BPGM      | protein_coding |
| 0,8545769 | SUCLG2    | protein_coding |
| 0,5402971 | CSDC2     | protein_coding |
| 0,2073391 | RCAN2     | protein_coding |
| 0,4466289 | IL16      | protein_coding |

|           |             |                      |
|-----------|-------------|----------------------|
| 0,9767278 | GNB2        | protein_coding       |
| 0,4740961 | GNG12       | protein_coding       |
| 0,4246004 | MYOZ2       | protein_coding       |
| 0,3792977 | SYNPO2      | protein_coding       |
| 0,633922  | COPS9       | protein_coding       |
| 0,9914435 | GTPBP2      | protein_coding       |
| 0,7444016 | FGGY        | protein_coding       |
| 0,4957019 | TCEAL1      | protein_coding       |
| 0,8545769 | ZNF24       | protein_coding       |
| 0,8427176 | MANEA       | protein_coding       |
| 0,7542355 | AFF1        | protein_coding       |
| 0,992369  | FIBP        | protein_coding       |
| 0,9828271 | PPP1CA      | protein_coding       |
| 0,9374881 | HCFC1       | protein_coding       |
| 0,7321942 | PDE3A       | protein_coding       |
| 0,9618453 | RASGRP1     | protein_coding       |
| 0,1667775 | CHCHD1      | protein_coding       |
| 0,7187791 | MRPL52      | protein_coding       |
| 0,5166442 | EFEMP2      | protein_coding       |
| 0,5879554 | WASHC2C     | protein_coding       |
| 0,5180247 | ZMAT3       | protein_coding       |
| 0,6425583 | ZFAND4      | protein_coding       |
| 0,872444  | SLFN11      | protein_coding       |
| 0,3451145 | FUT10       | protein_coding       |
| 0,4409678 | LRRC20      | protein_coding       |
| 0,8875885 | CFL1        | protein_coding       |
| 0,8330359 | TMCC1       | protein_coding       |
| 0,9781971 | NAA16       | protein_coding       |
| 0,445647  | FAM192A     | protein_coding       |
| 0,3724099 | CBWD1       | protein_coding       |
| 0,7419278 | DCP2        | protein_coding       |
| 0,8062191 | RPL38       | protein_coding       |
| 0,5245497 | CYP7B1      | protein_coding       |
| 0,4498511 | CES2        | protein_coding       |
| 0,9315593 | SP3         | protein_coding       |
| 0,902171  | DMXL1       | protein_coding       |
| 0,7912354 | ZNF621      | protein_coding       |
| 0,8131645 | NADSYN1     | protein_coding       |
| 0,9540553 | DHCR7       | protein_coding       |
| 0,8721867 | NBEA        | protein_coding       |
| 0,7639764 | OXSR1       | protein_coding       |
| 0,6607313 | PHF8        | protein_coding       |
| 0,7774855 | LCLAT1      | protein_coding       |
| 0,3030424 | MIR4435-2HG | lncRNA               |
| 0,2337466 | AC007318.1  | processed_pseudogene |
| 0,2908312 | GXYLT2      | protein_coding       |
| 0,5510556 | DCAKD       | protein_coding       |
| 0,855954  | TADA2B      | protein_coding       |
| 0,9481776 | GRK2        | protein_coding       |
| 0,9771336 | RELA        | protein_coding       |
| 0,784306  | ZNF680      | protein_coding       |
| 0,9081173 | HECTD4      | protein_coding       |
| 0,9112805 | BNC2        | protein_coding       |
| 0,4663698 | COQ2        | protein_coding       |
| 0,5140003 | TRMT112     | protein_coding       |
| 0,0385201 | LRRN3       | protein_coding       |
| 0,8369686 | KDM2A       | protein_coding       |
| 0,5245497 | MRPL57      | protein_coding       |
| 0,9491167 | NOC3L       | protein_coding       |

|           |          |                                |
|-----------|----------|--------------------------------|
| 0,6906735 | ESRRA    | protein_coding                 |
| 0,6285359 | COMMD1   | protein_coding                 |
| 0,9998478 | RAPH1    | protein_coding                 |
| 0,8917504 | ADCY5    | protein_coding                 |
| 0,9894339 | PARP14   | protein_coding                 |
| 0,9484395 | CKS1B    | protein_coding                 |
| 0,8522628 | ABCD2    | protein_coding                 |
| 0,7024923 | AHSA2P   | transcribed_unitary_pseudogene |
| 0,8823913 | ABLIM3   | protein_coding                 |
| 0,9998478 | MFSD4B   | protein_coding                 |
| 0,7247675 | VANGL1   | protein_coding                 |
| 0,3893986 | GLRX     | protein_coding                 |
| 0,6128477 | IQCB1    | protein_coding                 |
| 0,8745367 | GOLGB1   | protein_coding                 |
| 0,284683  | ZNF483   | protein_coding                 |
| 0,8221205 | MMRN2    | protein_coding                 |
| 0,7385573 | TNKS     | protein_coding                 |
| 0,3803906 | ZNF449   | protein_coding                 |
| 0,9290837 | ZBTB21   | protein_coding                 |
| 0,4513092 | PPP1R3B  | protein_coding                 |
| 0,073095  | STOX2    | protein_coding                 |
| 0,9410184 | MAP3K11  | protein_coding                 |
| 0,654521  | TRIB1    | protein_coding                 |
| 0,7972313 | C1QB     | protein_coding                 |
| 0,933129  | C1QA     | protein_coding                 |
| 0,943695  | DAG1     | protein_coding                 |
| 0,4514702 | ARV1     | protein_coding                 |
| 0,9270127 | NAA20    | protein_coding                 |
| 0,0379118 | MICOS10  | protein_coding                 |
| 0,633922  | EHBP1L1  | protein_coding                 |
| 0,7378932 | THAP2    | protein_coding                 |
| 0,5313262 | PPP1R14B | protein_coding                 |
| 0,330331  | SMARCC1  | protein_coding                 |
| 0,5768067 | ZNF417   | protein_coding                 |
| 0,9933219 | PTPRM    | protein_coding                 |
| 0,9544158 | VEGFB    | protein_coding                 |
| 0,5365997 | PEAK1    | protein_coding                 |
| 0,9461357 | MOB1B    | protein_coding                 |
| 0,8326738 | ZNF622   | protein_coding                 |
| 0,9238011 | CSPG4    | protein_coding                 |
| 0,3004311 | SNX33    | protein_coding                 |
| 0,8823093 | NABP1    | protein_coding                 |
| 0,7135515 | CHD2     | protein_coding                 |
| 0,4148453 | CEP83    | protein_coding                 |
| 0,6281588 | NUDT4    | protein_coding                 |
| 0,4165098 | SCAI     | protein_coding                 |
| 0,784306  | NMNAT1   | protein_coding                 |
| 0,7740102 | HSPB7    | protein_coding                 |
| 0,2179973 | UQCRH    | protein_coding                 |
| 0,9953531 | EIF1AX   | protein_coding                 |
| 0,8823913 | BCLAF3   | protein_coding                 |
| 0,5510619 | PSMD1    | protein_coding                 |
| 0,7743102 | HEG1     | protein_coding                 |
| 0,633922  | TOMM20   | protein_coding                 |
| 0,4835164 | AGFG1    | protein_coding                 |
| 0,5073762 | STAT5B   | protein_coding                 |
| 0,9112805 | CNP      | protein_coding                 |
| 0,7820981 | JUP      | protein_coding                 |
| 0,9820421 | EIF1     | protein_coding                 |

|           |           |                                    |
|-----------|-----------|------------------------------------|
| 0,8255851 | RNF213    | protein_coding                     |
| 0,8941532 | NET1      | protein_coding                     |
| 0,7125689 | DPY19L1   | protein_coding                     |
| 0,7444016 | ZNF791    | protein_coding                     |
| 0,7431559 | PHC3      | protein_coding                     |
| 0,6736287 | GOLIM4    | protein_coding                     |
| 0,8189129 | RBM4B     | protein_coding                     |
| 0,3271904 | ATP5MD    | protein_coding                     |
| 0,673546  | C1QTNF1   | protein_coding                     |
| 0,9416952 | MARCH3    | protein_coding                     |
| 0,4292102 | RBM4      | protein_coding                     |
| 0,7433064 | UBXN2A    | protein_coding                     |
| 0,4806087 | TCAP      | protein_coding                     |
| 0,8221205 | KLHL15    | protein_coding                     |
| 0,6254273 | FBXO45    | protein_coding                     |
| 0,9700303 | SLC25A30  | protein_coding                     |
| 0,633922  | CD34      | protein_coding                     |
| 0,4464427 | CTSF      | protein_coding                     |
| 0,620901  | MSRB3     | protein_coding                     |
| 0,8875885 | LEMD3     | protein_coding                     |
| 0,7558125 | TLR1      | protein_coding                     |
| 0,9998478 | FAM174A   | protein_coding                     |
| 0,4222683 | TRMT10C   | protein_coding                     |
| 0,2150608 | SELP      | protein_coding                     |
| 0,8373584 | MGA       | protein_coding                     |
| 0,8805902 | PIGG      | protein_coding                     |
| 0,8373584 | PRPF8     | protein_coding                     |
| 0,2073391 | ADCY6     | protein_coding                     |
| 0,9802452 | PITPNA    | protein_coding                     |
| 0,7671445 | DDX23     | protein_coding                     |
| 0,5801848 | ZBTB4     | protein_coding                     |
| 0,9481776 | ZHX3      | protein_coding                     |
| 0,7242009 | PODN      | protein_coding                     |
| 0,9944531 | STAG3L3   | transcribed_unprocessed_pseudogene |
| 0,997931  | RALGAPA1  | protein_coding                     |
| 0,6988495 | LIG4      | protein_coding                     |
| 0,9953531 | GTF2IRD2B | protein_coding                     |
| 0,5265966 | ABRA      | protein_coding                     |
| 0,1888441 | ATP2A2    | protein_coding                     |
| 0,8289129 | RPL4      | protein_coding                     |
| 0,4697514 | SNAPC5    | protein_coding                     |
| 0,9115427 | DENND4A   | protein_coding                     |
| 0,9484395 | ANKRD36C  | protein_coding                     |
| 0,8161522 | SLC26A9   | protein_coding                     |
| 0,4894579 | MRPL11    | protein_coding                     |
| 0,5817753 | AKIRIN1   | protein_coding                     |
| 0,736331  | MSL2      | protein_coding                     |
| 0,6285359 | CMKLR1    | protein_coding                     |
| 0,998169  | ANGEL2    | protein_coding                     |
| 0,5060008 | SLCO2A1   | protein_coding                     |
| 0,7558125 | ZNF266    | protein_coding                     |
| 0,7945147 | B4GAT1    | protein_coding                     |
| 0,9233889 | TMEM167A  | protein_coding                     |
| 0,2778507 | SH3PXD2B  | protein_coding                     |
| 0,8908494 | RESF1     | protein_coding                     |
| 0,5408562 | LARP7     | protein_coding                     |
| 0,5245497 | NR1D2     | protein_coding                     |
| 0,4684923 | RPL15     | protein_coding                     |
| 0,9702125 | FAM241A   | protein_coding                     |



|           |            |                      |
|-----------|------------|----------------------|
| 0,8500846 | SRP72      | protein_coding       |
| 0,9142106 | THAP6      | protein_coding       |
| 0,5869808 | FZD4       | protein_coding       |
| 0,9408651 | DENND6A    | protein_coding       |
| 0,9840915 | PDE12      | protein_coding       |
| 0,7611529 | GLMN       | protein_coding       |
| 0,0413597 | RSRC1      | protein_coding       |
| 0,9985172 | RAB1B      | protein_coding       |
| 0,6658884 | MICOS13    | protein_coding       |
| 0,9953531 | DHX36      | protein_coding       |
| 0,8373546 | AC026271.1 | processed_pseudogene |
| 0,6168923 | CTBP2      | protein_coding       |
| 0,4740961 | ZDHHC14    | protein_coding       |
| 0,6475905 | ATR        | protein_coding       |
| 0,1970133 | SNHG29     | lncRNA               |
| 0,7854018 | GK5        | protein_coding       |
| 0,9975676 | VCIPI1     | protein_coding       |
| 0,8575378 | DES        | protein_coding       |
| 0,8792761 | PDIK1L     | protein_coding       |
| 0,9589397 | TRAF6      | protein_coding       |
| 0,9705617 | ZNF654     | protein_coding       |
| 0,6543081 | TVP23C     | protein_coding       |
| 0,2841212 | MRPS22     | protein_coding       |
| 0,4834958 | PACS1      | protein_coding       |
| 0,8474324 | SH3BP5L    | protein_coding       |
| 0,4409678 | YPEL2      | protein_coding       |
| 0,366478  | CADM2      | protein_coding       |
| 0,8148845 | PSMD2      | protein_coding       |
| 0,3218826 | CSRP2      | protein_coding       |
| 0,8023631 | DDIT3      | protein_coding       |
| 0,6591549 | PCCA       | protein_coding       |
| 0,8829558 | DCTN2      | protein_coding       |
| 0,6000916 | NPPA       | protein_coding       |
| 0,7395639 | CTDSP2     | protein_coding       |
| 0,8578793 | CKAP5      | protein_coding       |
| 0,2568349 | ARHGAP1    | protein_coding       |
| 0,5511615 | ATG13      | protein_coding       |
| 0,9484395 | GOLGA8A    | protein_coding       |
| 0,9840915 | TP53I11    | protein_coding       |
| 0,7201269 | PHYKPL     | protein_coding       |
| 0,9738194 | ZNF519     | protein_coding       |
| 0,554581  | LSM1       | protein_coding       |
| 0,6190365 | BANF1      | protein_coding       |
| 0,624851  | TMEM9B     | protein_coding       |
| 0,7444016 | PTPN2      | protein_coding       |
| 0,8769229 | SMAD2      | protein_coding       |
| 0,4405523 | EIF3F      | protein_coding       |
| 0,4673249 | ZNF25      | protein_coding       |
| 0,9496064 | ARL10      | protein_coding       |
| 0,6790658 | CLTB       | protein_coding       |
| 0,7767291 | LPL        | protein_coding       |
| 0,8698319 | CCDC14     | protein_coding       |
| 0,9761718 | SART1      | protein_coding       |
| 0,7934256 | PPP2R2D    | protein_coding       |
| 0,328725  | MCTP1      | protein_coding       |
| 0,9039795 | ALG10B     | protein_coding       |
| 0,9182782 | PAAF1      | protein_coding       |
| 0,2492279 | MRPL48     | protein_coding       |
| 0,9998478 | RAB6A      | protein_coding       |

|           |          |                                    |
|-----------|----------|------------------------------------|
| 0,9998478 | ERCC4    | protein_coding                     |
| 0,2329611 | TMEM70   | protein_coding                     |
| 0,6613295 | TOM1L2   | protein_coding                     |
| 0,4089968 | MTLN     | protein_coding                     |
| 0,8578622 | MLXIP    | protein_coding                     |
| 0,5664861 | AURKAIP1 | protein_coding                     |
| 0,7956173 | SLC35E3  | protein_coding                     |
| 0,284683  | RUVBL1   | protein_coding                     |
| 0,1712026 | MSRA     | protein_coding                     |
| 0,7583175 | CTDNEP1  | protein_coding                     |
| 0,3578629 | RPL7AP66 | processed_pseudogene               |
| 0,5998801 | ZDHHC21  | protein_coding                     |
| 0,7154026 | PLEKHF2  | protein_coding                     |
| 0,5296182 | A2M      | protein_coding                     |
| 0,8844081 | UBE2O    | protein_coding                     |
| 0,8861906 | KLHL38   | protein_coding                     |
| 0,623981  | UNC119B  | protein_coding                     |
| 0,9628671 | DENND2C  | protein_coding                     |
| 0,1444307 | TUBB6    | protein_coding                     |
| 0,9127443 | LYSMD3   | protein_coding                     |
| 0,9481776 | NUPR1    | protein_coding                     |
| 0,7918194 | SLC35A4  | protein_coding                     |
| 0,6425736 | IP6K1    | protein_coding                     |
| 0,9481776 | CSTF3    | protein_coding                     |
| 0,8155634 | YES1     | protein_coding                     |
| 0,676881  | DLEU1    | lncRNA                             |
| 0,8992483 | TMEM39A  | protein_coding                     |
| 0,9358535 | TCP11L1  | protein_coding                     |
| 0,7102188 | BNIP3    | protein_coding                     |
| 0,8422988 | SMIM19   | protein_coding                     |
| 0,887319  | RTTN     | protein_coding                     |
| 0,440767  | ZBTB80S  | protein_coding                     |
| 0,2809994 | COX8A    | protein_coding                     |
| 0,7213265 | CDC26    | protein_coding                     |
| 0,922549  | CRLF3    | protein_coding                     |
| 0,7611529 | RNPEP    | protein_coding                     |
| 0,3137083 | KCMF1    | protein_coding                     |
| 0,7954765 | SPRYD4   | protein_coding                     |
| 0,4740961 | CLEC14A  | protein_coding                     |
| 0,9808899 | SYNE3    | protein_coding                     |
| 0,9709611 | CLK2     | protein_coding                     |
| 0,3578629 | SLCO3A1  | protein_coding                     |
| 0,6867028 | PLAAT3   | protein_coding                     |
| 0,5343413 | DIRAS1   | protein_coding                     |
| 0,8019639 | GNG7     | protein_coding                     |
| 0,9761718 | USF3     | protein_coding                     |
| 0,5754389 | RMDN1    | protein_coding                     |
| 0,7026925 | MEX3C    | protein_coding                     |
| 0,4252265 | RNF152   | protein_coding                     |
| 0,0908653 | MYO1D    | protein_coding                     |
| 0,54642   | LRRC37A  | protein_coding                     |
| 0,8786805 | TTYT14   | lncRNA                             |
| 0,3678372 | RBIS     | protein_coding                     |
| 0,8397654 | NCKAP5   | protein_coding                     |
| 0,9112805 | RUFY1    | protein_coding                     |
| 0,4840962 | LRRC37A3 | protein_coding                     |
| 0,8189129 | FKBP9P1  | transcribed_unprocessed_pseudogene |
| 0,8373584 | VSIG10   | protein_coding                     |
| 0,9781971 | FAM91A1  | protein_coding                     |

|           |          |                |
|-----------|----------|----------------|
| 0,6903585 | WSB2     | protein_coding |
| 0,5318944 | PNMA1    | protein_coding |
| 0,8373584 | TCIM     | protein_coding |
| 0,8105839 | ANKLE2   | protein_coding |
| 0,6219816 | THAP4    | protein_coding |
| 0,8674075 | NFATC2IP | protein_coding |
| 0,2797024 | FIBIN    | protein_coding |
| 0,8831297 | DPP7     | protein_coding |
| 0,8422988 | SEC24C   | protein_coding |
| 0,855954  | SMCR8    | protein_coding |
| 0,4532937 | MTHFR    | protein_coding |
| 0,9510059 | MTX3     | protein_coding |
| 0,3680294 | ZDHHC13  | protein_coding |
| 0,8721867 | SLC38A9  | protein_coding |
| 0,8099847 | POLE     | protein_coding |
| 0,702199  | SCN4B    | protein_coding |
| 0,7258655 | ANO6     | protein_coding |
| 0,4919121 | ZBTB34   | protein_coding |
| 0,9233889 | NUDT4B   | protein_coding |
| 0,4673249 | FAM210A  | protein_coding |
| 0,7558125 | TALDO1   | protein_coding |
| 0,481646  | RIMKLA   | protein_coding |
| 0,8698319 | RPS6KA3  | protein_coding |
| 0,9994264 | CHD9     | protein_coding |
| 0,6602321 | GATD1    | protein_coding |
| 0,3578629 | MAN1B1   | protein_coding |
| 0,7467854 | TOP3A    | protein_coding |
| 0,9540553 | ZBTB38   | protein_coding |
| 0,5245497 | C10orf71 | protein_coding |
| 0,7235397 | TIMM22   | protein_coding |
| 0,9912461 | MAGEF1   | protein_coding |
| 0,689194  | SAMD9L   | protein_coding |
| 0,692146  | PAWR     | protein_coding |
| 0,4835164 | TGIF1    | protein_coding |
| 0,8258095 | NR2C2    | protein_coding |
| 0,5140003 | CAVIN1   | protein_coding |
| 0,54953   | ARIH2    | protein_coding |
| 0,9215449 | ZBTB33   | protein_coding |
| 0,9768456 | ATOX1    | protein_coding |
| 0,9154815 | TBL1XR1  | protein_coding |
| 0,5336185 | SAMD12   | protein_coding |
| 0,0390866 | CD163    | protein_coding |
| 0,8373584 | RPLP2    | protein_coding |
| 0,5123161 | JUN      | protein_coding |
| 0,9800121 | CSTF2T   | protein_coding |
| 0,9253623 | GBA      | protein_coding |
| 0,9829583 | ACAD9    | protein_coding |
| 0,4599964 | IL17RA   | protein_coding |
| 0,9725101 | PNPLA2   | protein_coding |
| 0,9248086 | THAP5    | protein_coding |
| 0,3943278 | NAALADL2 | protein_coding |
| 0,9738181 | CD151    | protein_coding |
| 0,7296863 | POLR2L   | protein_coding |
| 0,6160654 | NECTIN3  | protein_coding |
| 0,6721745 | TMEM94   | protein_coding |
| 0,8743212 | FLII     | protein_coding |
| 0,7197887 | HNRNPA0  | protein_coding |
| 0,7954765 | CHID1    | protein_coding |
| 0,8885864 | ZNF518A  | protein_coding |

|           |          |                      |
|-----------|----------|----------------------|
| 0,7230802 | AP3S1    | protein_coding       |
| 0,645515  | GRB2     | protein_coding       |
| 0,9917279 | ZBTB41   | protein_coding       |
| 0,4835164 | UBE2N    | protein_coding       |
| 0,9680323 | ZNF354C  | protein_coding       |
| 0,5984498 | BET1L    | protein_coding       |
| 0,4726129 | RPS27    | protein_coding       |
| 0,5267449 | RIC8A    | protein_coding       |
| 0,8387664 | IMP3     | protein_coding       |
| 0,1900988 | ASB8     | protein_coding       |
| 0,9840915 | DPY19L2  | protein_coding       |
| 0,8745367 | DMAP1    | protein_coding       |
| 0,6662301 | CALHM5   | protein_coding       |
| 0,6776989 | IMPDH2   | protein_coding       |
| 0,9450135 | ALS2CL   | protein_coding       |
| 0,2407669 | MLF1     | protein_coding       |
| 0,9033043 | NDUFAF3  | protein_coding       |
| 0,7842247 | C2orf69  | protein_coding       |
| 0,887319  | PDE4DIP  | protein_coding       |
| 0,7558125 | DDX10    | protein_coding       |
| 0,9450135 | GOLGA8Q  | protein_coding       |
| 0,5567171 | ZNF518B  | protein_coding       |
| 0,8322139 | LCORL    | protein_coding       |
| 0,6229326 | SH2B1    | protein_coding       |
| 0,7763012 | POGLUT3  | protein_coding       |
| 0,62553   | PLEC     | protein_coding       |
| 0,8301309 | ZNF543   | protein_coding       |
| 0,8682799 | GALNT11  | protein_coding       |
| 0,645515  | WDR6     | protein_coding       |
| 0,4151093 | GEN1     | protein_coding       |
| 0,9356153 | ZNF354B  | protein_coding       |
| 0,5879554 | PLEKHM3  | protein_coding       |
| 0,659093  | NT5DC1   | protein_coding       |
| 0,6604792 | RPS3AP5  | processed_pseudogene |
| 0,1131434 | COX14    | protein_coding       |
| 0,9450135 | H3F3AP6  | processed_pseudogene |
| 0,4740961 | RPL10P16 | processed_pseudogene |
| 0,4151093 | P4HTM    | protein_coding       |
| 0,9282793 | DTX3     | protein_coding       |
| 0,4341808 | KLHL11   | protein_coding       |
| 0,5511615 | SLC25A20 | protein_coding       |
| 0,7550915 | CA8      | protein_coding       |
| 0,993752  | EPM2AIP1 | protein_coding       |
| 0,9725101 | ERBB4    | protein_coding       |
| 0,3558016 | MAF      | protein_coding       |
| 0,8847715 | CTNNBIP1 | protein_coding       |
| 0,3150284 | ERN1     | protein_coding       |
| 0,7007521 | CSRNP3   | protein_coding       |
| 0,9768456 | SUZ12    | protein_coding       |
| 0,9067454 | NSUN3    | protein_coding       |
| 0,9854982 | KCTD12   | protein_coding       |
| 0,9312186 | GRINA    | protein_coding       |
| 0,5400662 | THBD     | protein_coding       |
| 0,2164941 | COX5A    | protein_coding       |
| 0,8791066 | FAM219B  | protein_coding       |
| 0,9481776 | ZHX2     | protein_coding       |
| 0,435547  | MPI      | protein_coding       |
| 0,8086025 | EFCAB13  | protein_coding       |
| 0,9802452 | APOLD1   | protein_coding       |

|           |            |                        |
|-----------|------------|------------------------|
| 0,6230544 | DPY19L3    | protein_coding         |
| 0,8877092 | TAF7       | protein_coding         |
| 0,6160654 | CYBC1      | protein_coding         |
| 0,7673893 | GAK        | protein_coding         |
| 0,6999614 | TUFM       | protein_coding         |
| 0,9428271 | CTC1       | protein_coding         |
| 0,7431559 | FBXO34     | protein_coding         |
| 0,1767146 | SELENOW    | protein_coding         |
| 0,4422012 | EIF3K      | protein_coding         |
| 0,9385376 | MRFAP1L1   | protein_coding         |
| 0,4011774 | SNX18      | protein_coding         |
| 0,8267398 | MRFAP1     | protein_coding         |
| 0,9729242 | C3orf38    | protein_coding         |
| 0,645515  | RCC2       | protein_coding         |
| 0,5117223 | CYC1       | protein_coding         |
| 0,437327  | PER1       | protein_coding         |
| 0,5347705 | TMTC2      | protein_coding         |
| 0,5869872 | SPTY2D1    | protein_coding         |
| 0,73747   | SAMD4B     | protein_coding         |
| 0,3194617 | GIMAP7     | protein_coding         |
| 0,8255851 | TCAIM      | protein_coding         |
| 0,5073762 | FUCA1      | protein_coding         |
| 0,567026  | ZNF664     | protein_coding         |
| 0,9248086 | CALR       | protein_coding         |
| 0,3881918 | MAGED1     | protein_coding         |
| 0,7444016 | RAD23A     | protein_coding         |
| 0,7213265 | PTPN11     | protein_coding         |
| 0,5029234 | FAM156B    | protein_coding         |
| 0,887319  | CLK3       | protein_coding         |
| 0,8373584 | PACS2      | protein_coding         |
| 0,9804708 | ELMOD2     | protein_coding         |
| 0,59271   | LINC00174  | lncRNA                 |
| 0,7558125 | GEMIN4     | protein_coding         |
| 0,8019639 | KLHL28     | protein_coding         |
| 0,8784701 | ZBTB18     | protein_coding         |
| 0,9678404 | C14orf28   | protein_coding         |
| 0,9081173 | DNHD1      | protein_coding         |
| 0,4835164 | GCC1       | protein_coding         |
| 0,6383874 | CIITA      | protein_coding         |
| 0,3830653 | CDC42EP4   | protein_coding         |
| 0,9572126 | LACC1      | protein_coding         |
| 0,7094756 | MAF1       | protein_coding         |
| 0,8528913 | CDH5       | protein_coding         |
| 0,4019188 | FAM216B    | protein_coding         |
| 0,9907221 | PCBP1-AS1  | lncRNA                 |
| 0,933129  | MYADM      | protein_coding         |
| 0,4598598 | SERTAD2    | protein_coding         |
| 0,8592084 | PDXDC1     | protein_coding         |
| 0,887128  | ZNF154     | protein_coding         |
| 0,7972653 | R3HDM2     | protein_coding         |
| 0,2061005 | ITLN1      | protein_coding         |
| 0,3327196 | NRXN1      | protein_coding         |
| 0,284683  | SEPHS2     | protein_coding         |
| 0,3803906 | C14orf119  | protein_coding         |
| 0,997931  | BBS10      | protein_coding         |
| 0,9336853 | PUF60      | protein_coding         |
| 0,7235397 | AC140134.1 | unprocessed_pseudogene |
| 0,6762366 | TSHZ1      | protein_coding         |
| 0,9941501 | SOCS4      | protein_coding         |

|           |           |                                    |
|-----------|-----------|------------------------------------|
| 0,252949  | ZADH2     | protein_coding                     |
| 0,8189129 | TRNAU1AP  | protein_coding                     |
| 0,9994264 | EXOC3     | protein_coding                     |
| 0,9406097 | LYNX1     | protein_coding                     |
| 0,7500896 | MED14     | protein_coding                     |
| 0,2395631 | FAHD1     | protein_coding                     |
| 0,7154026 | PRKRA     | protein_coding                     |
| 0,4498511 | HERC2P3   | transcribed_unprocessed_pseudogene |
| 0,8274546 | FGD6      | protein_coding                     |
| 0,6254273 | OAZ2      | protein_coding                     |
| 0,4987955 | CCDC43    | protein_coding                     |
| 0,6785825 | HCLS1     | protein_coding                     |
| 0,0283162 | MTURN     | protein_coding                     |
| 0,8868311 | ZNF609    | protein_coding                     |
| 0,9538485 | PAK2      | protein_coding                     |
| 0,9621537 | CCDC66    | protein_coding                     |
| 0,6762366 | MCFD2     | protein_coding                     |
| 0,2354584 | GAS1      | protein_coding                     |
| 0,8992483 | MIGA1     | protein_coding                     |
| 0,9738194 | NRIP1     | protein_coding                     |
| 0,8033177 | TSPYL5    | protein_coding                     |
| 0,4806087 | HIST1H2AC | protein_coding                     |
| 0,5675917 | SRP9P1    | processed_pseudogene               |
| 0,9358487 | ZNF594    | protein_coding                     |
| 0,9163227 | PCGF5     | protein_coding                     |
| 0,7318327 | YOD1      | protein_coding                     |
| 0,8117718 | TMEM64    | protein_coding                     |
| 0,7296863 | SMG1P3    | transcribed_unprocessed_pseudogene |
| 0,8992483 | GPR157    | protein_coding                     |
| 0,1517576 | SLC36A4   | protein_coding                     |
| 0,9951314 | ZDHHC20   | protein_coding                     |
| 0,8921625 | ZFP3      | protein_coding                     |
| 0,2733926 | PPA1      | protein_coding                     |
| 0,9336246 | PDIA3P1   | transcribed_processed_pseudogene   |
| 0,5453247 | SSR4      | protein_coding                     |
| 0,504498  | CAPS2     | protein_coding                     |
| 0,8019639 | CUEDC1    | protein_coding                     |
| 0,933129  | KCTD2     | protein_coding                     |
| 0,9248086 | CMTR2     | protein_coding                     |
| 0,8898615 | PITPNB    | protein_coding                     |
| 0,6928629 | TCEAL8    | protein_coding                     |
| 0,7952381 | LRRC57    | protein_coding                     |
| 0,3195926 | MRPL14    | protein_coding                     |
| 0,9808899 | NQO1      | protein_coding                     |
| 0,3680294 | HIGD1A    | protein_coding                     |
| 0,692146  | CHRM2     | protein_coding                     |
| 0,9899185 | EHMT1     | protein_coding                     |
| 0,8078279 | ADIPOQ    | protein_coding                     |
| 0,0197802 | F2R       | protein_coding                     |
| 0,9248086 | NPM1      | protein_coding                     |
| 0,5154843 | PJA1      | protein_coding                     |
| 0,6835435 | DHTKD1    | protein_coding                     |
| 0,5219726 | POLR2A    | protein_coding                     |
| 0,9680053 | TLCD5     | protein_coding                     |
| 0,9738194 | ZNF322    | protein_coding                     |
| 0,8221205 | DDX60L    | protein_coding                     |
| 0,9917279 | ZNF678    | protein_coding                     |
| 0,7972313 | TMEM45A   | protein_coding                     |
| 0,669182  | RAP2B     | protein_coding                     |

|           |         |                      |
|-----------|---------|----------------------|
| 0,9773277 | RPL24P4 | processed_pseudogene |
| 0,633922  | SETD2   | protein_coding       |
| 0,3640941 | MRPS23  | protein_coding       |
| 0,9169269 | GPR135  | protein_coding       |
| 0,9728506 | ZNF875  | protein_coding       |
| 0,692146  | PLAG1   | protein_coding       |
| 0,7924243 | YIPF6   | protein_coding       |
| 0,8532945 | ZBTB20  | protein_coding       |
| 0,7062909 | DIPK2A  | protein_coding       |
| 0,9954421 | AMIGO1  | protein_coding       |
| 0,993752  | SIAH2   | protein_coding       |
| 0,2945575 | COPG1   | protein_coding       |
| 0,928336  | SLC9A9  | protein_coding       |
| 0,9357394 | RELL1   | protein_coding       |
| 0,3488985 | RFX7    | protein_coding       |
| 0,8847411 | RNF41   | protein_coding       |
| 0,4246004 | SLC2A4  | protein_coding       |
| 0,7639764 | IBA57   | protein_coding       |
| 0,9792506 | ZNF329  | protein_coding       |
| 0,9536474 | C5orf24 | protein_coding       |
| 0,5176282 | ADO     | protein_coding       |
| 0,4475789 | COA4    | protein_coding       |
| 0,5879554 | PRKAG1  | protein_coding       |
| 0,7894641 | CCDC149 | protein_coding       |
| 0,4164572 | MRPS11  | protein_coding       |
| 0,673546  | SNRPE   | protein_coding       |
| 0,1284788 | PNMA8A  | protein_coding       |
| 0,8500846 | CHST15  | protein_coding       |
| 0,1100299 | IDH2    | protein_coding       |
| 0,5416343 | GET1    | protein_coding       |
| 0,4810647 | TNRC18  | protein_coding       |
| 0,2948143 | NOP10   | protein_coding       |
| 0,6232447 | ZNF708  | protein_coding       |
| 0,8992483 | IST1    | protein_coding       |
| 0,9406097 | ERCC6L2 | protein_coding       |
| 0,6591549 | MRPL41  | protein_coding       |
| 0,979961  | CREB3L2 | protein_coding       |
| 0,7258405 | UNC5C   | protein_coding       |
| 0,1067405 | UBA7    | protein_coding       |
| 0,284683  | MRPS16  | protein_coding       |
| 0,0868691 | EXT1    | protein_coding       |
| 0,9156816 | SHMT2   | protein_coding       |
| 0,7025012 | ATP6AP2 | protein_coding       |
| 0,6604792 | BACE2   | protein_coding       |
| 0,7748443 | UBE2E2  | protein_coding       |
| 0,3150284 | SYNM    | protein_coding       |
| 0,9463209 | FIGN    | protein_coding       |
| 0,3881918 | AP1S2   | protein_coding       |
| 0,7081012 | C8orf33 | protein_coding       |
| 0,9142106 | C1S     | protein_coding       |
| 0,8153751 | KBTBD3  | protein_coding       |
| 0,9707919 | CLN8    | protein_coding       |
| 0,9625751 | NPLOC4  | protein_coding       |
| 0,6590532 | TSHZ2   | protein_coding       |
| 0,9374738 | EXOC7   | protein_coding       |
| 0,1428674 | KPNA2   | protein_coding       |
| 0,1773766 | BGN     | protein_coding       |
| 0,9977601 | CEP97   | protein_coding       |
| 0,2945575 | GLRX5   | protein_coding       |

|           |           |                      |
|-----------|-----------|----------------------|
| 0,7187791 | MXRA7     | protein_coding       |
| 0,5956025 | LIMK2     | protein_coding       |
| 0,997931  | ADI1      | protein_coding       |
| 0,7238799 | RWDD4     | protein_coding       |
| 0,8318664 | SATB1     | protein_coding       |
| 0,4684539 | CSF1R     | protein_coding       |
| 0,9233889 | TRAK1     | protein_coding       |
| 0,5600133 | PLCB1     | protein_coding       |
| 0,7546576 | SKA2      | protein_coding       |
| 0,6084958 | NDN       | protein_coding       |
| 0,2850896 | TTC3      | protein_coding       |
| 0,1174245 | IGIP      | protein_coding       |
| 0,9296784 | TSKU      | protein_coding       |
| 0,8670918 | ANXA2     | protein_coding       |
| 0,077831  | RGS6      | protein_coding       |
| 0,9463928 | PAPPA     | protein_coding       |
| 0,578003  | NGRN      | protein_coding       |
| 0,8062191 | CRIP2     | protein_coding       |
| 0,6621874 | ACBD3     | protein_coding       |
| 0,8423712 | C16orf72  | protein_coding       |
| 0,5594718 | PLCXD3    | protein_coding       |
| 0,3451145 | COL18A1   | protein_coding       |
| 0,8555218 | RBM10     | protein_coding       |
| 0,6543081 | RPL35A    | protein_coding       |
| 0,8373584 | ZNF721    | protein_coding       |
| 0,9975676 | C11orf54  | protein_coding       |
| 0,271425  | CEP63     | protein_coding       |
| 0,9284741 | SRPRA     | protein_coding       |
| 0,9496064 | EWSR1     | protein_coding       |
| 0,8387664 | HMGN4     | protein_coding       |
| 0,6383874 | SPATA13   | protein_coding       |
| 0,8786805 | GJC1      | protein_coding       |
| 0,8255851 | CNOT10    | protein_coding       |
| 0,9439974 | ZNF662    | protein_coding       |
| 0,8682799 | CADM1     | protein_coding       |
| 0,5866982 | NAA38     | protein_coding       |
| 0,7352523 | AP2A2     | protein_coding       |
| 0,9496064 | SLC8A1    | protein_coding       |
| 0,1934594 | ABAT      | protein_coding       |
| 0,7940001 | CAMK1D    | protein_coding       |
| 0,9127443 | RGPD6     | protein_coding       |
| 0,5964871 | LYSMD4    | protein_coding       |
| 0,9424246 | GAS6      | protein_coding       |
| 0,6659037 | NEB       | protein_coding       |
| 0,5400662 | GPC6      | protein_coding       |
| 0,8721867 | ARHGEF37  | protein_coding       |
| 0,7940988 | CEP57L1   | protein_coding       |
| 0,6613295 | SMDT1     | protein_coding       |
| 0,621558  | HSP90AB3P | processed_pseudogene |
| 0,9112805 | RUVBL2    | protein_coding       |
| 0,947809  | CTNNA3    | protein_coding       |
| 0,7816527 | PTTG1IP   | protein_coding       |
| 0,998169  | DDX41     | protein_coding       |
| 0,767127  | DAZAP2    | protein_coding       |
| 0,8381234 | SELENOF   | protein_coding       |
| 0,860343  | RPSAP19   | processed_pseudogene |
| 0,4835164 | ZNF623    | protein_coding       |
| 0,692146  | BCOR      | protein_coding       |
| 0,6395564 | JRKL      | protein_coding       |



|           |            |                                    |
|-----------|------------|------------------------------------|
| 0,3801685 | KIAA2026   | protein_coding                     |
| 0,8500846 | NPIPA1     | protein_coding                     |
| 0,9410289 | SF3A3      | protein_coding                     |
| 0,195587  | GRIN2A     | protein_coding                     |
| 0,9731251 | GTF2H2C    | protein_coding                     |
| 0,7820981 | ASB7       | protein_coding                     |
| 0,9210173 | MX2        | protein_coding                     |
| 0,9253623 | EP400      | protein_coding                     |
| 0,9925374 | PI4KAP2    | transcribed_unitary_pseudogene     |
| 0,4999985 | TENT5C     | protein_coding                     |
| 0,9734904 | COA5       | protein_coding                     |
| 0,115935  | UTP11      | protein_coding                     |
| 0,7576959 | PSMG1      | protein_coding                     |
| 0,6613295 | PRR14L     | protein_coding                     |
| 0,9377639 | SETD3      | protein_coding                     |
| 0,8163405 | FBXL7      | protein_coding                     |
| 0,7302504 | TANGO2     | protein_coding                     |
| 0,7611529 | SMG1P5     | transcribed_unprocessed_pseudogene |
| 0,290432  | SFXN4      | protein_coding                     |
| 0,1800952 | ZNF438     | protein_coding                     |
| 0,3049645 | HMCES      | protein_coding                     |
| 0,1560841 | NDUFB1     | protein_coding                     |
| 0,7190863 | GUSBP1     | transcribed_unprocessed_pseudogene |
| 0,7743102 | RFLNB      | protein_coding                     |
| 0,9860501 | UPP1       | protein_coding                     |
| 0,9865636 | TRIM52     | protein_coding                     |
| 0,8330359 | LHFPL6     | protein_coding                     |
| 0,450002  | CMTM4      | protein_coding                     |
| 0,6219816 | TMEM50A    | protein_coding                     |
| 0,6408377 | TBK1       | protein_coding                     |
| 0,7500896 | CBX6       | protein_coding                     |
| 0,9406097 | KREMEN1    | protein_coding                     |
| 0,9533676 | NPIPA5     | protein_coding                     |
| 0,3792977 | OLFML1     | protein_coding                     |
| 0,9766993 | RBM12B     | protein_coding                     |
| 0,4919121 | LIN9       | protein_coding                     |
| 0,7805908 | BTBD9      | protein_coding                     |
| 0,6184746 | KIRREL1    | protein_coding                     |
| 0,50493   | TOB2       | protein_coding                     |
| 0,6317974 | SCN5A      | protein_coding                     |
| 0,9427242 | UTY        | protein_coding                     |
| 0,9700639 | AC138969.1 | protein_coding                     |
| 0,9484395 | KMT5A      | protein_coding                     |
| 0,6808534 | SMTN       | protein_coding                     |
| 0,4521055 | COA3       | protein_coding                     |
| 0,4894579 | PTP4A2     | protein_coding                     |
| 0,7956408 | ACTG1      | protein_coding                     |
| 0,88341   | DENND5A    | protein_coding                     |
| 0,3030424 | UQCR10     | protein_coding                     |
| 0,7095541 | FAM120C    | protein_coding                     |
| 0,7154026 | EIF3C      | protein_coding                     |
| 0,5486193 | NIPSNAP1   | protein_coding                     |
| 0,9734904 | SCFD2      | protein_coding                     |
| 0,1140347 | UBE2F      | protein_coding                     |
| 0,7987424 | PPP1R2     | protein_coding                     |
| 0,5985056 | TSPYL2     | protein_coding                     |
| 0,9998538 | GOLGA6L4   | protein_coding                     |
| 0,4990941 | C22orf46   | transcribed_unitary_pseudogene     |
| 0,8210379 | IRAK1      | protein_coding                     |

|           |           |                                    |
|-----------|-----------|------------------------------------|
| 0,2329611 | CMSS1     | protein_coding                     |
| 0,4314663 | PCDH9     | protein_coding                     |
| 0,6762366 | ACOT1     | protein_coding                     |
| 0,9248086 | OAF       | protein_coding                     |
| 0,8698319 | HIST2H2AC | protein_coding                     |
| 0,6999614 | TM2D3     | protein_coding                     |
| 0,4070535 | PRKD1     | protein_coding                     |
| 0,8148845 | CCSER1    | protein_coding                     |
| 0,9484259 | RPL23AP82 | transcribed_unprocessed_pseudogene |
| 0,2250724 | SLIT3     | protein_coding                     |
| 0,4724079 | EFNA5     | protein_coding                     |
| 0,8847715 | CSF1      | protein_coding                     |
| 0,5895248 | MAML2     | protein_coding                     |
| 0,9678404 | SS18L1    | protein_coding                     |
| 0,998169  | COPB2     | protein_coding                     |
| 0,8991816 | KNTC1     | protein_coding                     |
| 0,7137584 | WDR27     | protein_coding                     |
| 0,8623405 | FOXO4     | protein_coding                     |
| 0,4635653 | PTP4A3    | protein_coding                     |
| 0,0015119 | PROS1     | protein_coding                     |
| 0,8545769 | ZFP1      | protein_coding                     |
| 0,6604792 | DHRS7C    | protein_coding                     |
| 0,5688668 | SOCS3     | protein_coding                     |
| 0,9879323 | XPOT      | protein_coding                     |
| 0,9253623 | TMEM173   | protein_coding                     |
| 0,9296784 | PDE4B     | protein_coding                     |
| 0,8751323 | C14orf180 | protein_coding                     |
| 0,4344504 | SNN       | protein_coding                     |
| 0,5318944 | MED12     | protein_coding                     |
| 0,6442182 | SEPTIN9   | protein_coding                     |
| 0,9494054 | ZBTB40    | protein_coding                     |
| 0,993752  | HIST2H2BE | protein_coding                     |
| 0,887319  | EIF4ENIF1 | protein_coding                     |
| 0,9182782 | RNLS      | protein_coding                     |
| 0,7058095 | ATL3      | protein_coding                     |
| 0,0830387 | NDUFA12   | protein_coding                     |
| 0,6462207 | UBE2G2    | protein_coding                     |
| 0,0895372 | APOO      | protein_coding                     |
| 0,9572126 | TMED9     | protein_coding                     |
| 0,9894339 | RBM33     | protein_coding                     |
| 0,1326966 | ARMCX2    | protein_coding                     |
| 0,7842706 | BTBD6     | protein_coding                     |
| 0,9215449 | SUMO3     | protein_coding                     |
| 0,9166492 | IMMP2L    | protein_coding                     |
| 0,4430845 | ZFP90     | protein_coding                     |
| 0,1763931 | NDUFA6    | protein_coding                     |
| 0,654521  | AP3M1     | protein_coding                     |
| 0,2329611 | F8        | protein_coding                     |
| 0,781311  | CA13      | protein_coding                     |
| 0,9535559 | CIB1      | protein_coding                     |
| 0,2318378 | FLRT2     | protein_coding                     |
| 0,9738194 | RPS27L    | protein_coding                     |
| 0,3691605 | ADSSL1    | protein_coding                     |
| 0,6787299 | FAF1      | protein_coding                     |
| 0,9540553 | NSMCE3    | protein_coding                     |
| 0,9925196 | HSF1      | protein_coding                     |
| 0,9533676 | C6orf120  | protein_coding                     |
| 0,5647201 | PURA      | protein_coding                     |
| 0,841477  | NOMO2     | protein_coding                     |

|           |            |                                    |
|-----------|------------|------------------------------------|
| 0,7444016 | IFITM2     | protein_coding                     |
| 0,8440006 | TNFAIP2    | protein_coding                     |
| 0,8930787 | ZNF445     | protein_coding                     |
| 0,9700303 | TCEAL9     | protein_coding                     |
| 0,9792506 | PRMT3      | protein_coding                     |
| 0,7039013 | PRPF39     | protein_coding                     |
| 0,7156356 | KIAA0825   | protein_coding                     |
| 0,7118106 | ZBTB37     | protein_coding                     |
| 0,6444859 | RGPD2      | protein_coding                     |
| 0,9836846 | ARL15      | protein_coding                     |
| 0,3715255 | TCN2       | protein_coding                     |
| 0,7029174 | ATP6V0A2   | protein_coding                     |
| 0,9450135 | PRKN       | protein_coding                     |
| 0,6238595 | HGS        | protein_coding                     |
| 0,673546  | MRPL30     | protein_coding                     |
| 0,9865636 | TARSL2     | protein_coding                     |
| 0,7816267 | METTL7A    | protein_coding                     |
| 0,7490465 | GPRIN3     | protein_coding                     |
| 0,0197802 | ROR1       | protein_coding                     |
| 0,7912354 | SDHAP1     | transcribed_unprocessed_pseudogene |
| 0,9112805 | AC138393.1 | transcribed_unprocessed_pseudogene |
| 0,9954421 | BRCC3      | protein_coding                     |
| 0,4533439 | PRKG1      | protein_coding                     |
| 0,7671445 | NR2F2      | protein_coding                     |
| 0,9107956 | AHNAK2     | protein_coding                     |
| 0,9729242 | OLFML2A    | protein_coding                     |
| 0,7397205 | SP1        | protein_coding                     |
| 0,9590601 | WASH3P     | transcribed_unprocessed_pseudogene |
| 0,6190365 | MRPL40     | protein_coding                     |
| 0,8210922 | PCGF3      | protein_coding                     |
| 0,6254273 | P4HB       | protein_coding                     |
| 0,3245535 | PSMD13     | protein_coding                     |
| 0,6511285 | PBX1       | protein_coding                     |
| 0,997931  | AC034236.1 | processed_pseudogene               |
| 0,5964345 | ZFP36L1    | protein_coding                     |
| 0,1712026 | UBE2L3     | protein_coding                     |
| 0,9709611 | BRWD1      | protein_coding                     |
| 0,8922683 | EP400P1    | transcribed_unprocessed_pseudogene |
| 0,7213265 | SMG1P4     | transcribed_unprocessed_pseudogene |
| 0,9846914 | MOSMO      | protein_coding                     |
| 0,4593896 | DRG1       | protein_coding                     |
| 0,6462349 | ANKFY1     | protein_coding                     |
| 0,9544158 | YTHDF3     | protein_coding                     |
| 0,578003  | SRL        | protein_coding                     |
| 0,9928407 | IFIT1      | protein_coding                     |
| 0,7611529 | MORF4L1    | protein_coding                     |
| 0,533016  | PIGP       | protein_coding                     |
| 0,8301309 | BCAP31     | protein_coding                     |
| 0,4826313 | ARL17A     | protein_coding                     |
| 0,7431973 | RPL12P4    | processed_pseudogene               |
| 0,8422988 | DNAH14     | protein_coding                     |
| 0,9762117 | NPIP4      | protein_coding                     |
| 0,1112135 | TRIM69     | protein_coding                     |
| 0,6563172 | IFITM1     | protein_coding                     |
| 0,9891373 | LAMP1      | protein_coding                     |
| 0,9463928 | KLHDC8B    | protein_coding                     |
| 0,9773277 | SETD4      | protein_coding                     |
| 0,654521  | RNPC3      | protein_coding                     |
| 0,9781971 | ZNF267     | protein_coding                     |

|           |            |                                    |
|-----------|------------|------------------------------------|
| 0,8545769 | IRS2       | protein_coding                     |
| 0,9925374 | BICD2      | protein_coding                     |
| 0,4498511 | TMLHE      | protein_coding                     |
| 0,7154026 | SDHAP3     | transcribed_unprocessed_pseudogene |
| 0,8578622 | RASA3      | protein_coding                     |
| 0,6574161 | LRCH3      | protein_coding                     |
| 0,9968111 | ZNF566     | protein_coding                     |
| 0,9636851 | ZNF529     | protein_coding                     |
| 0,9680053 | AIDA       | protein_coding                     |
| 0,9609096 | C15orf41   | protein_coding                     |
| 0,8723583 | AC012085.1 | processed_pseudogene               |
| 0,9463928 | GSAP       | protein_coding                     |
| 0,4672216 | CYP2R1     | protein_coding                     |
| 0,6446908 | ANKRD46    | protein_coding                     |
| 0,8788135 | ZBTB6      | protein_coding                     |
| 0,6475905 | POLR3C     | protein_coding                     |
| 0,8850351 | CCDC84     | protein_coding                     |
| 0,9583561 | POLR1D     | protein_coding                     |
| 0,8918731 | MRTFB      | protein_coding                     |
| 0,9484395 | ZNF17      | protein_coding                     |
| 0,7230802 | TOR3A      | protein_coding                     |
| 0,0015119 | PPP1CC     | protein_coding                     |
| 0,8919058 | ZNF555     | protein_coding                     |
| 0,2737133 | NAP1L3     | protein_coding                     |
| 0,3218826 | PRELID2    | protein_coding                     |
| 0,2318378 | BACE1      | protein_coding                     |
| 0,4919058 | THBS2      | protein_coding                     |
| 0,8722519 | RXRA       | protein_coding                     |
| 0,8875885 | ZNF75D     | protein_coding                     |
| 0,90504   | GOLGA8R    | protein_coding                     |
| 0,8409875 | KPNA4      | protein_coding                     |
| 0,472118  | TRDN       | protein_coding                     |
| 0,6903585 | ZNF197     | protein_coding                     |
| 0,9538485 | NAP1L2     | protein_coding                     |
| 0,8562264 | RPS23      | protein_coding                     |
| 0,6475905 | GNG2       | protein_coding                     |
| 0,2354584 | BTN3A2     | protein_coding                     |
| 0,7118106 | PCLO       | protein_coding                     |
| 0,8682799 | INSIG1     | protein_coding                     |
| 0,7062909 | SEPTIN10   | protein_coding                     |
| 0,7698372 | SMYD4      | protein_coding                     |
| 0,8922683 | GPATCH8    | protein_coding                     |
| 0,9508384 | NF2        | protein_coding                     |
| 0,2737133 | UBE2H      | protein_coding                     |
| 0,6128477 | MIR22HG    | lncRNA                             |
| 0,8949542 | KATNA1     | protein_coding                     |
| 0,8966801 | FSD2       | protein_coding                     |
| 0,6297108 | ARAP1      | protein_coding                     |
| 0,6999614 | PDE2A      | protein_coding                     |
| 0,6042348 | ZFP91      | protein_coding                     |
| 0,4888499 | LYRM7      | protein_coding                     |
| 0,7291201 | BCR        | protein_coding                     |
| 0,7054786 | ZNF397     | protein_coding                     |
| 0,7154026 | ZSCAN30    | protein_coding                     |
| 0,8373546 | TPCN1      | protein_coding                     |
| 0,9465232 | HEXIM1     | protein_coding                     |
| 0,7984578 | MAPT       | protein_coding                     |
| 0,6604792 | ZDHHC17    | protein_coding                     |
| 0,3358172 | ZNF395     | protein_coding                     |

|           |            |                      |
|-----------|------------|----------------------|
| 0,9781971 | PPARA      | protein_coding       |
| 0,6304019 | RPS19BP1   | protein_coding       |
| 0,4311333 | TEAD1      | protein_coding       |
| 0,9077931 | ENTPD5     | protein_coding       |
| 0,8992483 | MITF       | protein_coding       |
| 0,9861848 | NAP1L1     | protein_coding       |
| 0,2443691 | CMC1       | protein_coding       |
| 0,9535559 | AKR1C1     | protein_coding       |
| 0,7242009 | RNF220     | protein_coding       |
| 0,427478  | SHTN1      | protein_coding       |
| 0,9678404 | ZNF546     | protein_coding       |
| 0,7918194 | TSPYL4     | protein_coding       |
| 0,7912354 | AC100800.1 | lncRNA               |
| 0,6840329 | SESTD1     | protein_coding       |
| 0,5504165 | FNBP1      | protein_coding       |
| 0,5622225 | DYNC2H1    | protein_coding       |
| 0,9234217 | RSBN1L     | protein_coding       |
| 0,6824068 | TAF9B      | protein_coding       |
| 0,9933219 | MAGI2      | protein_coding       |
| 0,6662301 | CHP1       | protein_coding       |
| 0,5327661 | FPR3       | protein_coding       |
| 0,8672415 | COL4A1     | protein_coding       |
| 0,6473313 | PTMA       | protein_coding       |
| 0,7433064 | HSPA14     | protein_coding       |
| 0,9933219 | USP7       | protein_coding       |
| 0,7972313 | MAGEH1     | protein_coding       |
| 0,6658691 | RGPD1      | protein_coding       |
| 0,5558351 | PERM1      | protein_coding       |
| 0,3792977 | TMSB4XP8   | processed_pseudogene |
| 0,578739  | ERC2       | protein_coding       |
| 0,6762366 | B3GLCT     | protein_coding       |
| 0,1916186 | SPRY4      | protein_coding       |
| 0,1356256 | C2orf88    | protein_coding       |
| 0,7118106 | TMEM203    | protein_coding       |
| 0,9794449 | THSD4      | protein_coding       |
| 0,9282881 | TCEA1      | protein_coding       |
| 0,9194718 | SECISBP2   | protein_coding       |
| 0,5777334 | SEMA4D     | protein_coding       |
| 0,8831146 | MCRS1      | protein_coding       |
| 0,808959  | FANCM      | protein_coding       |
| 0,887128  | HIST1H1C   | protein_coding       |
| 0,7362379 | FAM122A    | protein_coding       |
| 0,2283663 | COL14A1    | protein_coding       |
| 0,8117718 | UBQLN2     | protein_coding       |
| 0,7291254 | RILPL1     | protein_coding       |
| 0,5180247 | C11orf95   | protein_coding       |
| 0,3316892 | GPR89B     | protein_coding       |
| 0,9952606 | COL4A5     | protein_coding       |
| 0,7154506 | ZNF626     | protein_coding       |
| 0,9516698 | ZC3H6      | protein_coding       |
| 0,9768456 | LAMTOR4    | protein_coding       |
| 0,7154026 | DCUN1D3    | protein_coding       |
| 0,6383874 | ZNF793     | protein_coding       |
| 0,4318356 | TUBB4B     | protein_coding       |
| 0,9485776 | AGAP4      | protein_coding       |
| 0,7337852 | COMMD6     | protein_coding       |
| 0,8155634 | PLA2G2A    | protein_coding       |
| 0,9463928 | ZNF383     | protein_coding       |
| 0,2908312 | PLSCR1     | protein_coding       |

|           |           |                                    |
|-----------|-----------|------------------------------------|
| 0,9781148 | ZNF559    | protein_coding                     |
| 0,3520154 | GTF2F2    | protein_coding                     |
| 0,9925374 | FAM92A    | protein_coding                     |
| 0,9954421 | FOCAD     | protein_coding                     |
| 0,9738194 | CHM       | protein_coding                     |
| 0,9925374 | BLOC1S5   | protein_coding                     |
| 0,9127443 | SRSF10    | protein_coding                     |
| 0,0640162 | HBA2      | protein_coding                     |
| 0,7102291 | CCDC9B    | protein_coding                     |
| 0,4344504 | NBR1      | protein_coding                     |
| 0,9670362 | RALGAPA2  | protein_coding                     |
| 0,9951314 | SUMO2     | protein_coding                     |
| 0,9802452 | RTL6      | protein_coding                     |
| 0,7704778 | DPYD      | protein_coding                     |
| 0,6543081 | S100A16   | protein_coding                     |
| 0,8545769 | PTAR1     | protein_coding                     |
| 0,3222894 | PARVB     | protein_coding                     |
| 0,5869872 | UROS      | protein_coding                     |
| 0,3435112 | ZDHHC9    | protein_coding                     |
| 0,9583561 | SMIM15    | protein_coding                     |
| 0,4521055 | VWC2      | protein_coding                     |
| 0,9367988 | FSIP2     | protein_coding                     |
| 0,6563172 | PRELP     | protein_coding                     |
| 0,9296784 | ZNF548    | protein_coding                     |
| 0,9484395 | MTF1      | protein_coding                     |
| 0,992369  | ZNF322P1  | processed_pseudogene               |
| 0,9709611 | NHLRC3    | protein_coding                     |
| 0,9177329 | ZDHHC11   | protein_coding                     |
| 0,9628588 | RPL14     | protein_coding                     |
| 0,6383874 | RPSAP47   | processed_pseudogene               |
| 0,9081173 | MSL1      | protein_coding                     |
| 0,8371307 | LRRK2     | protein_coding                     |
| 0,8476238 | TRMT2B    | protein_coding                     |
| 0,8219774 | HACD4     | protein_coding                     |
| 0,7118106 | FAM120AOS | protein_coding                     |
| 0,9771336 | NOC2L     | protein_coding                     |
| 0,861259  | ZNF292    | protein_coding                     |
| 0,504498  | SHLD2P3   | unprocessed_pseudogene             |
| 0,888621  | ZNF567    | protein_coding                     |
| 0,1729437 | NDUFA4    | protein_coding                     |
| 0,9112805 | RELN      | protein_coding                     |
| 0,0132445 | APOD      | protein_coding                     |
| 0,4845704 | H1F0      | protein_coding                     |
| 0,426935  | LITAF     | protein_coding                     |
| 0,7247675 | TMEM120A  | protein_coding                     |
| 0,7499102 | ARID2     | protein_coding                     |
| 0,6624016 | SF3B3     | protein_coding                     |
| 0,9997554 | UBE2Q2P1  | transcribed_unprocessed_pseudogene |
| 0,887319  | ZNF573    | protein_coding                     |
| 0,9194718 | ZNF527    | protein_coding                     |
| 0,5474737 | S100A13   | protein_coding                     |
| 0,8895276 | ZNF33A    | protein_coding                     |
| 0,7639764 | PCDH18    | protein_coding                     |
| 0,7203672 | BTBD8     | protein_coding                     |
| 0,8801863 | DPY19L2P1 | transcribed_unprocessed_pseudogene |
| 0,8255851 | MAOA      | protein_coding                     |
| 0,9183994 | PAX8-AS1  | lncRNA                             |
| 0,4883835 | TSPYL1    | protein_coding                     |
| 0,9997554 | PNRC2     | protein_coding                     |

|           |          |                                    |
|-----------|----------|------------------------------------|
| 0,9194118 | RRP7A    | protein_coding                     |
| 0,7954765 | LIN54    | protein_coding                     |
| 0,7630684 | FAM53B   | protein_coding                     |
| 0,5879554 | SLC35E2B | protein_coding                     |
| 0,8622656 | RPS2P46  | processed_pseudogene               |
| 0,1382998 | TOGARAM2 | protein_coding                     |
| 0,9082846 | NEMP2    | protein_coding                     |
| 0,9854182 | GSPT2    | protein_coding                     |
| 0,8206562 | HMGB1    | protein_coding                     |
| 0,8561515 | USP32P3  | transcribed_unprocessed_pseudogene |
| 0,9362082 | BLOC1S2  | protein_coding                     |
| 0,7740102 | IL1RAP   | protein_coding                     |
| 0,1131434 | ZNF676   | protein_coding                     |
| 0,4344705 | ZNF699   | protein_coding                     |
| 0,8528913 | TDRD7    | protein_coding                     |
| 0,1412577 | HLA-DRB1 | protein_coding                     |
| 0,7842706 | AKR1C3   | protein_coding                     |
| 0,9450135 | SPATS2L  | protein_coding                     |
| 0,993752  | ZNF250   | protein_coding                     |
| 0,7956408 | WDSUB1   | protein_coding                     |
| 0,6999614 | S100A4   | protein_coding                     |
| 0,4848227 | FAT4     | protein_coding                     |
| 0,8875885 | ACADSB   | protein_coding                     |
| 0,5062136 | STK40    | protein_coding                     |
| 0,8500846 | TMEM63A  | protein_coding                     |
| 0,3087684 | MPHOSPH8 | protein_coding                     |
| 0,5017459 | EEF1A1P5 | processed_pseudogene               |
| 0,9761718 | ZNF766   | protein_coding                     |
| 0,997931  | FAM217B  | protein_coding                     |
| 0,6765217 | TUBB     | protein_coding                     |
| 0,9315593 | LCOR     | protein_coding                     |
| 0,6084958 | SUPT5H   | protein_coding                     |
| 0,9540553 | XPNPEP3  | protein_coding                     |
| 0,8108219 | ZNF107   | protein_coding                     |
| 0,8427405 | PPIA     | protein_coding                     |
| 0,4835164 | ZNF471   | protein_coding                     |
| 0,8575378 | ZNF493   | protein_coding                     |
| 0,9572126 | GTF2IRD2 | protein_coding                     |
| 0,5768067 | NIF3L1   | protein_coding                     |
| 0,8847715 | GARS-DT  | lncRNA                             |
| 0,9536474 | IARS     | protein_coding                     |
| 0,9738194 | MFSD14C  | transcribed_unprocessed_pseudogene |
| 0,9768456 | POM121   | protein_coding                     |
| 0,9287437 | ZBTB44   | protein_coding                     |
| 0,9755908 | CD55     | protein_coding                     |
| 0,8422988 | WDR5     | protein_coding                     |
| 0,9312186 | LONP1    | protein_coding                     |
| 0,8318664 | TRRAP    | protein_coding                     |
| 0,6620763 | SRGAP2B  | protein_coding                     |
| 0,8721867 | ZNF140   | protein_coding                     |
| 0,9127443 | PTPN1    | protein_coding                     |
| 0,3178501 | EVL      | protein_coding                     |
| 0,993752  | EPHB4    | protein_coding                     |
| 0,922549  | ZNF765   | protein_coding                     |
| 0,6199488 | ZNF124   | protein_coding                     |
| 0,6254273 | XRCC6    | protein_coding                     |
| 0,6140495 | TSC22D2  | protein_coding                     |
| 0,9956922 | ZNF569   | protein_coding                     |
| 0,7952381 | ARMCX4   | protein_coding                     |

|           |            |                                    |
|-----------|------------|------------------------------------|
| 0,9759014 | PIK3R4     | protein_coding                     |
| 0,8176511 | ZNF605     | protein_coding                     |
| 0,9998538 | TRAPPC2    | protein_coding                     |
| 0,8318664 | SIAH1      | protein_coding                     |
| 0,7175299 | ESRRG      | protein_coding                     |
| 0,9756408 | NCOR2      | protein_coding                     |
| 0,9021812 | SULT1A1    | protein_coding                     |
| 0,8438938 | PRPF40A    | protein_coding                     |
| 0,9406097 | GDAP2      | protein_coding                     |
| 0,9738194 | TCEAL3     | protein_coding                     |
| 0,2533818 | ANAPC7     | protein_coding                     |
| 0,642899  | TPK1       | protein_coding                     |
| 0,7104968 | AFAP1      | protein_coding                     |
| 0,6613295 | NACA       | protein_coding                     |
| 0,6229784 | MYO18A     | protein_coding                     |
| 0,6588074 | MAN2A2     | protein_coding                     |
| 0,9998538 | MME        | protein_coding                     |
| 0,5723744 | SULF2      | protein_coding                     |
| 0,8930787 | LAMA2      | protein_coding                     |
| 0,1517576 | PLXNB2     | protein_coding                     |
| 0,9238608 | MYO6       | protein_coding                     |
| 0,9290744 | MRTFA      | protein_coding                     |
| 0,5511615 | HDAC2      | protein_coding                     |
| 0,9908419 | ZNF782     | protein_coding                     |
| 0,806905  | ZNF846     | protein_coding                     |
| 0,9112805 | ADH1B      | protein_coding                     |
| 0,8578793 | TCF4       | protein_coding                     |
| 0,784187  | RABL6      | protein_coding                     |
| 0,9170247 | ZNF136     | protein_coding                     |
| 0,7740102 | ZKSCAN5    | protein_coding                     |
| 0,9464798 | TRAPPC4    | protein_coding                     |
| 0,9379013 | AC004057.1 | transcribed_processed_pseudogene   |
| 0,7213265 | TECPR2     | protein_coding                     |
| 0,9887908 | ZFP62      | protein_coding                     |
| 0,855954  | ERI2       | protein_coding                     |
| 0,9699064 | TOMM7      | protein_coding                     |
| 0,7010516 | ZNF33B     | protein_coding                     |
| 0,9618453 | AMZ2       | protein_coding                     |
| 0,7552965 | ZNF431     | protein_coding                     |
| 0,928336  | NF1        | protein_coding                     |
| 0,654521  | VKORC1L1   | protein_coding                     |
| 0,9644268 | ZNF418     | protein_coding                     |
| 0,2945575 | DAPK1      | protein_coding                     |
| 0,0390866 | HLA-DQA1   | protein_coding                     |
| 0,6731385 | GM2A       | protein_coding                     |
| 0,9891373 | ZNF700     | protein_coding                     |
| 0,9953531 | CD47       | protein_coding                     |
| 0,5276954 | TLE1       | protein_coding                     |
| 0,8834615 | STRN3      | protein_coding                     |
| 0,2506935 | ILRUN      | protein_coding                     |
| 0,290302  | PPTC7      | protein_coding                     |
| 0,8992483 | RGPD4      | protein_coding                     |
| 0,9803555 | NHLRC2     | protein_coding                     |
| 0,7744962 | ZFP28      | protein_coding                     |
| 0,1933793 | CBWD3      | protein_coding                     |
| 0,8877092 | KPNA5      | protein_coding                     |
| 0,8745367 | ANKRD36B   | protein_coding                     |
| 0,8447416 | ARHGEF12   | protein_coding                     |
| 0,1100299 | ZNF252P    | transcribed_unprocessed_pseudogene |



|           |          |                      |
|-----------|----------|----------------------|
| 0,9074092 | FLNA     | protein_coding       |
| 0,8875885 | SRGAP1   | protein_coding       |
| 0,5647201 | FAM3C    | protein_coding       |
| 0,5210286 | NOP9     | protein_coding       |
| 0,4498511 | SLC39A10 | protein_coding       |
| 0,7816267 | CASP4    | protein_coding       |
| 0,90504   | AP2A1    | protein_coding       |
| 0,8425029 | ZNF585A  | protein_coding       |
| 0,7444016 | FUT11    | protein_coding       |
| 0,3844531 | ANXA4    | protein_coding       |
| 0,9277595 | WDR45    | protein_coding       |
| 0,8622656 | METTL9   | protein_coding       |
| 0,9700303 | ZNF138   | protein_coding       |
| 0,711869  | ZNF429   | protein_coding       |
| 0,7258655 | ZNF470   | protein_coding       |
| 0,9463928 | ZNF100   | protein_coding       |
| 0,9087161 | ZNF398   | protein_coding       |
| 0,9439974 | ZSCAN25  | protein_coding       |
| 0,8619772 | ANXA6    | protein_coding       |
| 0,9828271 | ZNF441   | protein_coding       |
| 0,8782347 | GMFB     | protein_coding       |
| 0,998169  | ZNF420   | protein_coding       |
| 0,7713242 | ZMYM1    | protein_coding       |
| 0,8318664 | HIST1H4C | protein_coding       |
| 0,8992483 | ZSCAN26  | protein_coding       |
| 0,933129  | MAFG     | protein_coding       |
| 0,9082846 | KIAA1671 | protein_coding       |
| 0,7942035 | IGF2R    | protein_coding       |
| 0,7613174 | DYNC1H1  | protein_coding       |
| 0,7467854 | PCBP2    | protein_coding       |
| 0,4675238 | PGAP1    | protein_coding       |
| 0,7237365 | ZNF772   | protein_coding       |
| 0,5985056 | ADAM32   | protein_coding       |
| 0,8087971 | ACSL5    | protein_coding       |
| 0,9781971 | LRRC8B   | protein_coding       |
| 0,6999614 | SND1     | protein_coding       |
| 0,6664224 | PSMD12   | protein_coding       |
| 0,9700639 | NOL4L    | protein_coding       |
| 0,5511615 | ENTPD4   | protein_coding       |
| 0,5011485 | C1D      | protein_coding       |
| 0,6238595 | TBC1D9B  | protein_coding       |
| 0,504498  | KANK2    | protein_coding       |
| 0,4894579 | EIF4BP6  | processed_pseudogene |
| 0,9367988 | GTF2E2   | protein_coding       |
| 0,8851105 | FITM2    | protein_coding       |
| 0,8114908 | ZNF720   | protein_coding       |
| 0,9296784 | DDI2     | protein_coding       |
| 0,5393446 | SVIL     | protein_coding       |
| 0,864196  | TRIM33   | protein_coding       |
| 0,8301309 | LRP10    | protein_coding       |
| 0,8885864 | PELI1    | protein_coding       |
| 0,9581517 | ZNF655   | protein_coding       |
| 0,2281984 | MRPL21   | protein_coding       |
| 0,7805908 | SLC22A5  | protein_coding       |
| 0,730414  | ADARB1   | protein_coding       |
| 0,9919804 | HTT      | protein_coding       |
| 0,3792977 | IPP      | protein_coding       |
| 0,5688668 | MAP3K5   | protein_coding       |
| 0,7506449 | GSTK1    | protein_coding       |

|           |          |                |
|-----------|----------|----------------|
| 0,4724079 | HNRNPAB  | protein_coding |
| 0,7228252 | PDGFA    | protein_coding |
| 0,3222894 | RPF2     | protein_coding |
| 0,9428271 | MYO5A    | protein_coding |
| 0,9998478 | C5orf56  | lncRNA         |
| 0,9998538 | ATG7     | protein_coding |
| 0,3177457 | SIPA1L1  | protein_coding |
| 0,933129  | TTC30A   | protein_coding |
| 0,7611529 | PIGN     | protein_coding |
| 0,6088362 | COL4A6   | protein_coding |
| 0,9538485 | TOPORS   | protein_coding |
| 0,654521  | BCO2     | protein_coding |
| 0,8722519 | ENTPD6   | protein_coding |
| 0,7931208 | ENPP1    | protein_coding |
| 0,8163405 | FAR1     | protein_coding |
| 0,9327336 | CPLANE1  | protein_coding |
| 0,6543081 | ZNF841   | protein_coding |
| 0,0895372 | MFAP5    | protein_coding |
| 0,4835164 | MYH6     | protein_coding |
| 0,7118106 | ZNF615   | protein_coding |
| 0,7481835 | CXorf40A | protein_coding |
| 0,8225056 | CDC42SE1 | protein_coding |
| 0,9363291 | MPEG1    | protein_coding |
| 0,5267449 | SPTAN1   | protein_coding |
| 0,7291201 | PARVA    | protein_coding |
| 0,1801696 | FAM114A1 | protein_coding |
| 0,3316892 | RPE      | protein_coding |
| 0,6574161 | ZNF460   | protein_coding |
| 0,8238032 | PHF2     | protein_coding |
| 0,7936863 | RPS26    | protein_coding |
| 0,8221205 | PSAP     | protein_coding |
| 0,9115427 | S100A10  | protein_coding |
| 0,965142  | RPL37A   | protein_coding |
| 0,8890235 | TXNRD3   | protein_coding |
| 0,6986866 | CFD      | protein_coding |
| 0,9998478 | MCMBP    | protein_coding |
| 0,7443726 | KLHDC1   | protein_coding |
| 0,799869  | ZNF81    | protein_coding |
| 0,5709725 | TAF13    | protein_coding |
| 0,8966801 | ZNF780A  | protein_coding |
| 0,6254273 | FAM118B  | protein_coding |
| 0,7456311 | SLC9A8   | protein_coding |
| 0,6476315 | ZNF181   | protein_coding |
| 0,8155634 | INKA2    | protein_coding |
| 0,7611529 | ZNF44    | protein_coding |
| 0,5265966 | SGTB     | protein_coding |
| 0,9142106 | ZNF790   | protein_coding |
| 0,933129  | FAM49A   | protein_coding |
| 0,6682217 | MYO1C    | protein_coding |
| 0,4237568 | NKIRAS1  | protein_coding |
| 0,3881918 | KIF13B   | protein_coding |
| 0,7352491 | NRAP     | protein_coding |
| 0,9364548 | ADH5     | protein_coding |
| 0,9998478 | SPG7     | protein_coding |
| 0,97835   | HRNR     | protein_coding |
| 0,8653179 | ZNF677   | protein_coding |
| 0,9484395 | ERO1A    | protein_coding |
| 0,9463928 | ZNF347   | protein_coding |
| 0,5323751 | PLCG2    | protein_coding |

|           |            |                        |
|-----------|------------|------------------------|
| 0,9463928 | S100A6     | protein_coding         |
| 0,561634  | RPL12      | protein_coding         |
| 0,671498  | DNM3       | protein_coding         |
| 0,9700303 | ZNF121     | protein_coding         |
| 0,7542355 | MPZL1      | protein_coding         |
| 0,6098976 | VPS13A     | protein_coding         |
| 0,6277796 | MBP        | protein_coding         |
| 0,8825313 | GOLGA6L9   | protein_coding         |
| 0,4957019 | C1orf122   | protein_coding         |
| 0,9998478 | NOL8       | protein_coding         |
| 0,8324551 | IRAK4      | protein_coding         |
| 0,6516554 | MRPL42     | protein_coding         |
| 0,7987982 | ENTPD7     | protein_coding         |
| 0,7546576 | RPS4X      | protein_coding         |
| 0,8863508 | ZNF84      | protein_coding         |
| 0,9057527 | MAK16      | protein_coding         |
| 0,7088772 | ZNF667     | protein_coding         |
| 0,8640757 | SIRPA      | protein_coding         |
| 0,6604792 | MARCH5     | protein_coding         |
| 0,9544158 | NPIPB13    | protein_coding         |
| 0,9842675 | CD2AP      | protein_coding         |
| 0,8682799 | ZNF649     | protein_coding         |
| 0,6285359 | ZNF248     | protein_coding         |
| 0,8847715 | LPAR1      | protein_coding         |
| 0,6473313 | MB         | protein_coding         |
| 0,6371005 | HIBCH      | protein_coding         |
| 0,9831527 | ZNF544     | protein_coding         |
| 0,8355525 | ZNF770     | protein_coding         |
| 0,9386808 | MIER1      | protein_coding         |
| 0,8189129 | MAN1A2     | protein_coding         |
| 0,7558125 | SVIP       | protein_coding         |
| 0,7558125 | ZNF251     | protein_coding         |
| 0,9264586 | DDR GK1    | protein_coding         |
| 0,9287437 | TFDP1      | protein_coding         |
| 0,9767278 | HSD17B11   | protein_coding         |
| 0,9406097 | SZT2       | protein_coding         |
| 0,9296784 | QRICH1     | protein_coding         |
| 0,8871625 | FKBP1C     | protein_coding         |
| 0,3327196 | DDX42      | protein_coding         |
| 0,3600539 | AC131392.1 | unprocessed_pseudogene |
| 0,8833614 | RPL23A     | protein_coding         |
| 0,8238032 | STYX       | protein_coding         |
| 0,5544626 | UBL5       | protein_coding         |
| 0,624851  | HELZ       | protein_coding         |
| 0,284683  | TMEM116    | protein_coding         |
| 0,7558125 | PEG3       | protein_coding         |
| 0,9792506 | SDAD1      | protein_coding         |
| 0,6899599 | ZKSCAN8    | protein_coding         |
| 0,141284  | MYL4       | protein_coding         |
| 0,8295224 | GET3       | protein_coding         |
| 0,9828457 | ASPH       | protein_coding         |
| 0,5660793 | SPRED2     | protein_coding         |
| 0,3514523 | WWP2       | protein_coding         |
| 0,2329611 | GFPT1      | protein_coding         |
| 0,6254273 | UVRAG      | protein_coding         |
| 0,9364287 | ZNF26      | protein_coding         |
| 0,8847411 | ITSN2      | protein_coding         |
| 0,7692025 | BZW1P2     | processed_pseudogene   |
| 0,445647  | OGA        | protein_coding         |

|           |          |                                    |
|-----------|----------|------------------------------------|
| 0,5879554 | ZNF658B  | transcribed_unprocessed_pseudogene |
| 0,9033043 | TCAF1    | protein_coding                     |
| 0,9792506 | TXNRD1   | protein_coding                     |
| 0,7118106 | ZNF568   | protein_coding                     |
| 0,4806087 | ZXDB     | protein_coding                     |
| 0,4943386 | ZNF480   | protein_coding                     |
| 0,9082846 | ZNF587   | protein_coding                     |
| 0,5558351 | TPM2     | protein_coding                     |
| 0,7880474 | SH3BGRL2 | protein_coding                     |
| 0,993752  | ZNF808   | protein_coding                     |
| 0,997931  | YTHDF2   | protein_coding                     |
| 0,8851105 | TMA16    | protein_coding                     |
| 0,2313926 | HLA-DRB5 | protein_coding                     |
| 0,8259599 | ZNF43    | protein_coding                     |
| 0,7357059 | GPN1     | protein_coding                     |
| 0,7118106 | PLN      | protein_coding                     |
| 0,7894641 | ZNF28    | protein_coding                     |
| 0,6322951 | ZNF627   | protein_coding                     |
| 0,6638064 | CTNND1   | protein_coding                     |
| 0,7740102 | DDX39B   | protein_coding                     |
| 0,9074092 | NUDT16   | protein_coding                     |
| 0,7559894 | TLK1     | protein_coding                     |
| 0,9125449 | LRBA     | protein_coding                     |
| 0,962885  | BAZ1A    | protein_coding                     |
| 0,6244656 | COPS8    | protein_coding                     |
| 0,8269408 | PPIAP22  | processed_pseudogene               |
| 0,2506935 | CCDC69   | protein_coding                     |
| 0,9962215 | MDM4     | protein_coding                     |
| 0,8565825 | RYR2     | protein_coding                     |
| 0,8949542 | KLHL9    | protein_coding                     |
| 0,9299044 | NCOA6    | protein_coding                     |
| 0,7114715 | STK39    | protein_coding                     |
| 0,5111636 | C6orf89  | protein_coding                     |
| 0,6371005 | CALM1    | protein_coding                     |
| 0,7842247 | TTC37    | protein_coding                     |
| 0,3358222 | PAPSS2   | protein_coding                     |
| 0,4513092 | SLC9A6   | protein_coding                     |
| 0,7135352 | FAN1     | protein_coding                     |
| 0,9003006 | EIF1AY   | protein_coding                     |
| 0,9422708 | MT-ND6   | protein_coding                     |
| 0,9928407 | IPO9     | protein_coding                     |
| 0,7740102 | CEP290   | protein_coding                     |
| 0,7639764 | MT-CO2   | protein_coding                     |
| 0,8992483 | TOGARAM1 | protein_coding                     |
| 0,4684539 | ECI2     | protein_coding                     |
| 0,8625711 | UNC13B   | protein_coding                     |
| 0,8825313 | MT-CYB   | protein_coding                     |
| 0,3616153 | LDB1     | protein_coding                     |
| 0,4422012 | PPP1R14C | protein_coding                     |
| 0,5180247 | CTR9     | protein_coding                     |
| 0,5440543 | F5       | protein_coding                     |
| 0,6660548 | LRRTM3   | protein_coding                     |
| 0,7249384 | ZNF652   | protein_coding                     |
| 0,8641364 | SMURF1   | protein_coding                     |
| 0,7968733 | SLC5A3   | protein_coding                     |
| 0,7924243 | MTCO3P12 | unprocessed_pseudogene             |
| 0,6673583 | CDC42BPB | protein_coding                     |
| 0,6951729 | RPL10A   | protein_coding                     |
| 0,3480863 | COLGALT2 | protein_coding                     |

|           |          |                |
|-----------|----------|----------------|
| 0,949756  | MT-ND2   | protein_coding |
| 0,5011485 | RCSB1    | protein_coding |
| 0,7558125 | FAM169A  | protein_coding |
| 0,8463447 | MT-ND5   | protein_coding |
| 0,8825313 | CNOT7    | protein_coding |
| 0,9998538 | TMEM184B | protein_coding |
| 0,9575231 | MTOR     | protein_coding |
| 0,9998538 | ZNF521   | protein_coding |
| 0,4521055 | ALPK2    | protein_coding |
| 0,9680053 | LRIG2    | protein_coding |
| 0,8545769 | MT-CO1   | protein_coding |
| 0,1528801 | LRRC10   | protein_coding |
| 0,9205351 | GK       | protein_coding |
| 0,7816267 | FOXJ3    | protein_coding |
| 0,9458749 | SFT2D1   | protein_coding |
| 0,8130999 | CHAMP1   | protein_coding |
| 0,253927  | INPP5F   | protein_coding |
| 0,1064872 | HMGN2    | protein_coding |
| 0,9376695 | SELENOM  | protein_coding |
| 0,7318327 | UBE2J1   | protein_coding |
| 0,7178359 | OPA1     | protein_coding |
| 0,8500846 | DENND4B  | protein_coding |
| 0,9457094 | ZNF277   | protein_coding |
| 0,6023346 | MT-ND3   | protein_coding |
| 0,9296784 | DUSP27   | protein_coding |
| 0,6689227 | SELENOT  | protein_coding |
| 0,6658691 | CES1     | protein_coding |
| 0,9082846 | RUSC2    | protein_coding |
| 0,9544158 | OSTC     | protein_coding |
| 0,4408807 | TSEN15   | protein_coding |
| 0,6383874 | LTN1     | protein_coding |
| 0,9738194 | RUNDC1   | protein_coding |
| 0,9700303 | GRK5     | protein_coding |
| 0,3942661 | TYW1     | protein_coding |
| 0,3616153 | DCAF12   | protein_coding |
| 0,7188119 | SFMBT2   | protein_coding |
| 0,9792506 | MT-ND4   | protein_coding |
| 0,9647765 | SMC5     | protein_coding |
| 0,9450135 | MT-ND1   | protein_coding |
| 0,3358222 | SHISA4   | protein_coding |
| 0,721162  | CIPC     | protein_coding |
| 0,54953   | CAPZA2   | protein_coding |
| 0,9338281 | MT-ATP6  | protein_coding |
| 0,9928407 | TOP1     | protein_coding |
| 0,4919121 | MAP3K3   | protein_coding |
| 0,5346782 | SREBF2   | protein_coding |
| 0,7401378 | RPL39    | protein_coding |
| 0,8653179 | DZIP3    | protein_coding |
| 0,445647  | KIAA0753 | protein_coding |
| 0,8015756 | DCLRE1A  | protein_coding |
| 0,9142106 | ATG9A    | protein_coding |
| 0,2337466 | GPRASP1  | protein_coding |
| 0,7673893 | MT-CO3   | protein_coding |
| 0,7965978 | DMD      | protein_coding |
| 0,5679388 | NAGA     | protein_coding |
| 0,9894339 | SMG5     | protein_coding |
| 0,7352523 | KIF1BP   | protein_coding |
| 0,9647765 | TGM2     | protein_coding |
| 0,6818653 | ARMCX6   | protein_coding |

|           |            |                                    |
|-----------|------------|------------------------------------|
| 0,8578793 | PJA2       | protein_coding                     |
| 0,9725364 | SGMS1      | protein_coding                     |
| 0,6867028 | RNA5SP370  | rRNA_pseudogene                    |
| 0,6796078 | RNA5SP389  | rRNA_pseudogene                    |
| 0,6676251 | RNA5SP226  | rRNA_pseudogene                    |
| 0,4344705 | RNU5A-1    | snRNA                              |
| 0,5296182 | Y_RNA      | misc_RNA                           |
| 0,7740102 | RNA5SP145  | rRNA_pseudogene                    |
| 0,5245497 | SNORA73B   | snoRNA                             |
| 0,6634961 | RNU5B-1    | snRNA                              |
| 0,5817753 | RN7SKP255  | misc_RNA                           |
| 0,5445815 | Y_RNA      | misc_RNA                           |
| 0,6044319 | RN7SKP203  | misc_RNA                           |
| 0,5183663 | Y_RNA      | misc_RNA                           |
| 0,9628671 | RNA5SP429  | rRNA_pseudogene                    |
| 0,9725364 | RNU4-1     | snRNA                              |
| 0,4466289 | SNORA74A   | snoRNA                             |
| 0,5573066 | RNY1       | misc_RNA                           |
| 0,5777334 | RNA5SP202  | rRNA_pseudogene                    |
| 0,7500896 | RN7SKP71   | misc_RNA                           |
| 0,624851  | RNU6-7     | snRNA                              |
| 0,5115453 | RNY3P1     | misc_RNA                           |
| 0,5847346 | SNORA23    | snoRNA                             |
| 0,824287  | RN7SKP80   | misc_RNA                           |
| 0,5265966 | RNY3       | misc_RNA                           |
| 0,7968733 | RN7SKP230  | misc_RNA                           |
| 0,7984578 | RNU4-2     | snRNA                              |
| 0,7385573 | ZNF525     | protein_coding                     |
| 0,5276954 | INF2       | protein_coding                     |
| 0,9917279 | RBMS3-AS2  | lncRNA                             |
| 0,5558351 | EFCAB2     | protein_coding                     |
| 0,8702296 | CHML       | protein_coding                     |
| 0,7558125 | TATDN3     | protein_coding                     |
| 0,8176511 | MIR29B2CHG | lncRNA                             |
| 0,0648859 | CR1        | protein_coding                     |
| 0,8553175 | FCGR3A     | protein_coding                     |
| 0,4747639 | FAM229B    | protein_coding                     |
| 0,9642558 | EEF1AKMT2  | protein_coding                     |
| 0,5082264 | DDO        | protein_coding                     |
| 0,9112805 | RBM20      | protein_coding                     |
| 0,8786805 | SNHG5      | lncRNA                             |
| 0,9808899 | GDI1       | protein_coding                     |
| 0,88513   | PCMTD2     | protein_coding                     |
| 0,9233889 | LINC00632  | lncRNA                             |
| 0,9309593 | EFCAB7     | protein_coding                     |
| 0,6657649 | LINC00963  | lncRNA                             |
| 0,8930787 | SYS1       | protein_coding                     |
| 0,9967216 | INPP5B     | protein_coding                     |
| 0,7823793 | MAFB       | protein_coding                     |
| 0,483594  | TRAF3IP1   | protein_coding                     |
| 0,6574161 | CHIC1      | protein_coding                     |
| 0,864196  | GIGYF2     | protein_coding                     |
| 0,8238032 | RUFY2      | protein_coding                     |
| 0,8545769 | NHSL2      | protein_coding                     |
| 0,391877  | GGTA1P     | protein_coding                     |
| 0,8996267 | PHACTR4    | protein_coding                     |
| 0,7137814 | ASAH2B     | protein_coding                     |
| 0,0727176 | TMEM273    | protein_coding                     |
| 0,9170247 | BMS1P1     | transcribed_unprocessed_pseudogene |

|           |            |                                |
|-----------|------------|--------------------------------|
| 0,8898615 | MACO1      | protein_coding                 |
| 0,9039014 | PTPN20     | protein_coding                 |
| 0,6129557 | ZDBF2      | protein_coding                 |
| 0,611428  | DAXX       | protein_coding                 |
| 0,7956173 | BMPR2      | protein_coding                 |
| 0,8834615 | TCEA3      | protein_coding                 |
| 0,3942661 | RXRB       | protein_coding                 |
| 0,995098  | HNRNPCP2   | processed_pseudogene           |
| 0,7685768 | BRD2       | protein_coding                 |
| 0,4721364 | HLA-DMA    | protein_coding                 |
| 0,4626741 | COL5A2     | protein_coding                 |
| 0,8375248 | PSMB8      | protein_coding                 |
| 0,9537852 | SPIN3      | protein_coding                 |
| 0,284683  | HLA-DRA    | protein_coding                 |
| 0,445647  | COL15A1    | protein_coding                 |
| 0,7558125 | NOTCH4     | protein_coding                 |
| 0,7182975 | PBX2       | protein_coding                 |
| 0,1712026 | RNF5       | protein_coding                 |
| 0,998169  | SKIV2L     | protein_coding                 |
| 0,9131236 | NELFE      | protein_coding                 |
| 0,5393446 | SDHD       | protein_coding                 |
| 0,8863637 | NEU1       | protein_coding                 |
| 0,9528743 | HSPA1B     | protein_coding                 |
| 0,9377639 | HSPA1A     | protein_coding                 |
| 0,9828271 | VARS       | protein_coding                 |
| 0,9874145 | MBD5       | protein_coding                 |
| 0,9850681 | C6orf47    | protein_coding                 |
| 0,9768456 | BAG6       | protein_coding                 |
| 0,8500846 | PRRC2A     | protein_coding                 |
| 0,887319  | AIF1       | protein_coding                 |
| 0,9803555 | ZNF814     | protein_coding                 |
| 0,8971447 | ZNF551     | protein_coding                 |
| 0,4779341 | ZNF805     | protein_coding                 |
| 0,4835164 | HLA-C      | protein_coding                 |
| 0,7444016 | DHX16      | protein_coding                 |
| 0,2437974 | MRPS18B    | protein_coding                 |
| 0,3616153 | PPP1R10    | protein_coding                 |
| 0,9802452 | ABCF1      | protein_coding                 |
| 0,1601158 | DDR1       | protein_coding                 |
| 0,5276954 | GNL1       | protein_coding                 |
| 0,2337466 | HLA-E      | protein_coding                 |
| 0,9609142 | ZNF468     | protein_coding                 |
| 0,5511615 | ZNF616     | protein_coding                 |
| 0,3706065 | PPP1R11    | protein_coding                 |
| 0,9625751 | ZNRD1ASP   | transcribed_unitary_pseudogene |
| 0,8695843 | RACK1      | protein_coding                 |
| 0,6023346 | TBC1D8     | protein_coding                 |
| 0,290432  | HLA-F      | protein_coding                 |
| 0,684772  | LINC02210  | transcribed_unitary_pseudogene |
| 0,9450135 | RPS26P8    | processed_pseudogene           |
| 0,7395639 | GABBR1     | protein_coding                 |
| 0,284683  | TRIM27     | protein_coding                 |
| 0,9463928 | AC083899.1 | unprocessed_pseudogene         |
| 0,3792977 | RANBP17    | protein_coding                 |
| 0,5890453 | CBWD4P     | unprocessed_pseudogene         |
| 0,6462349 | ZNF204P    | processed_pseudogene           |
| 0,8992483 | ATXN2      | protein_coding                 |
| 0,7607016 | DCTN1      | protein_coding                 |
| 0,9284465 | TCTN1      | protein_coding                 |

|           |             |                                    |
|-----------|-------------|------------------------------------|
| 0,9729242 | MZT1        | protein_coding                     |
| 0,7081667 | TRIM13      | protein_coding                     |
| 0,3513961 | PKHD1L1     | protein_coding                     |
| 0,8992483 | SLC35B4     | protein_coding                     |
| 0,8438109 | TRIQQ       | protein_coding                     |
| 0,9962215 | ZBTB10      | protein_coding                     |
| 0,8229361 | LGR4        | protein_coding                     |
| 0,1232731 | VIT         | protein_coding                     |
| 0,7892243 | E2F4        | protein_coding                     |
| 0,5170218 | PDE7A       | protein_coding                     |
| 0,90504   | TMEM170B    | protein_coding                     |
| 0,913228  | SNX2        | protein_coding                     |
| 0,9484395 | IPO7        | protein_coding                     |
| 0,8176511 | PRR13       | protein_coding                     |
| 0,166273  | INSYN1      | protein_coding                     |
| 0,6305527 | SAMD9       | protein_coding                     |
| 0,620901  | CNEPIR1     | protein_coding                     |
| 0,645515  | CCDC85C     | protein_coding                     |
| 0,9894339 | NAP1L4      | protein_coding                     |
| 0,7359516 | SMG1P2      | transcribed_unprocessed_pseudogene |
| 0,4806087 | TMSB4X      | protein_coding                     |
| 0,6084958 | SMN2        | protein_coding                     |
| 0,5117223 | SERF1B      | protein_coding                     |
| 0,2354584 | HMGN1       | protein_coding                     |
| 0,9841237 | STAG3L1     | transcribed_unprocessed_pseudogene |
| 0,7065438 | EIF3CL      | protein_coding                     |
| 0,9928407 | LCMT1       | protein_coding                     |
| 0,9668896 | LIN52       | protein_coding                     |
| 0,5964345 | SMIM11A     | protein_coding                     |
| 0,5336185 | TECRL       | protein_coding                     |
| 0,7985804 | DPF3        | protein_coding                     |
| 0,4336027 | ETFRF1      | protein_coding                     |
| 0,9033043 | ITSN1       | protein_coding                     |
| 0,2908312 | ITPRIPL2    | protein_coding                     |
| 0,6527079 | CRYZL1      | protein_coding                     |
| 0,8969303 | C5orf51     | protein_coding                     |
| 0,5402971 | RPS3AP47    | processed_pseudogene               |
| 0,9481776 | RNPS1       | protein_coding                     |
| 0,3087684 | NYNRIN      | protein_coding                     |
| 0,284683  | DNAJC19     | protein_coding                     |
| 0,8868311 | DOK6        | protein_coding                     |
| 0,7395639 | JPT2        | protein_coding                     |
| 0,7025012 | ZDHHC11B    | protein_coding                     |
| 0,7154026 | GOLGA8O     | protein_coding                     |
| 0,5140003 | HERC2P9     | transcribed_unprocessed_pseudogene |
| 0,073095  | HBA1        | protein_coding                     |
| 0,462729  | HCP5        | lncRNA                             |
| 0,4886257 | HLA-H       | unprocessed_pseudogene             |
| 0,7397205 | COL6A6      | protein_coding                     |
| 0,4999985 | RAB12       | protein_coding                     |
| 0,2330928 | HLA-A       | protein_coding                     |
| 0,5916421 | HACD2       | protein_coding                     |
| 0,7639764 | CFAP44      | protein_coding                     |
| 0,6184079 | VGLL3       | protein_coding                     |
| 0,9699064 | ANKRD28     | protein_coding                     |
| 0,2354584 | COLQ        | protein_coding                     |
| 0,7774855 | THUMPD3-AS1 | lncRNA                             |
| 0,6632698 | RNVU1-7     | snRNA                              |
| 0,7467854 | RNU1-28P    | snRNA                              |



|           |            |                      |
|-----------|------------|----------------------|
| 0,7010516 | RNU1-27P   | snRNA                |
| 0,5026144 | RNU6-1     | snRNA                |
| 0,6173428 | Y_RNA      | misc_RNA             |
| 0,6662301 | RNU1-1     | snRNA                |
| 0,7736716 | RNVU1-18   | snRNA                |
| 0,6591379 | RNU6-36P   | snRNA                |
| 0,6462349 | RNU6-4P    | snRNA                |
| 0,5445815 | RNU6-5P    | snRNA                |
| 0,6887436 | RNU1-2     | snRNA                |
| 0,8099847 | SNORA54    | snoRNA               |
| 0,5688668 | RNU6-3P    | snRNA                |
| 0,522489  | Y_RNA      | misc_RNA             |
| 0,6337897 | RNU6-2     | snRNA                |
| 0,7010516 | RNU1-4     | snRNA                |
| 0,4954628 | SNORD15B   | snoRNA               |
| 0,620901  | RNU6-9     | snRNA                |
| 0,6563172 | RNU1-3     | snRNA                |
| 0,5647201 | RNU6-33P   | snRNA                |
| 0,6785825 | SNORD94    | snoRNA               |
| 0,9998478 | SNORA49    | snoRNA               |
| 0,6658884 | MT-RNR2    | Mt_rRNA              |
| 0,9410289 | MT-TA      | Mt_tRNA              |
| 0,9341044 | MT-TN      | Mt_tRNA              |
| 0,9982092 | MT-TC      | Mt_tRNA              |
| 0,7984578 | MT-TY      | Mt_tRNA              |
| 0,6607313 | MT-TP      | Mt_tRNA              |
| 0,4222223 | GPX3       | protein_coding       |
| 0,8875885 | DIO2       | protein_coding       |
| 0,8375248 | STK38L     | protein_coding       |
| 0,8619772 | SACM1L     | protein_coding       |
| 0,6835435 | MT-RNR1    | Mt_rRNA              |
| 0,9412812 | TSN        | protein_coding       |
| 0,7054786 | SLC48A1    | protein_coding       |
| 0,3943278 | SNORD17    | snoRNA               |
| 0,3305341 | SNORA74B   | snoRNA               |
| 0,5245497 | SNORA53    | snoRNA               |
| 0,6903585 | SNORA12    | snoRNA               |
| 0,984386  | AC064799.1 | processed_pseudogene |
| 0,9781971 | LINC02693  | lncRNA               |
| 0,4302368 | RPL15P3    | processed_pseudogene |
| 0,9953531 | MT-ND4L    | protein_coding       |
| 0,887128  | RPS26P6    | processed_pseudogene |
| 0,9479329 | ZNF611     | protein_coding       |
| 0,997931  | NUP62      | protein_coding       |
| 0,9781971 | DENND1B    | protein_coding       |
| 0,7321942 | SFT2D2     | protein_coding       |
| 0,7972313 | FGFR1OP    | protein_coding       |
| 0,9082846 | SCAF8      | protein_coding       |
| 0,2543569 | ACKR1      | protein_coding       |
| 0,8888699 | ZNF254     | protein_coding       |
| 0,2046145 | KLHL23     | protein_coding       |
| 0,8323828 | RPL22P1    | processed_pseudogene |
| 0,7682033 | MLLT11     | protein_coding       |
| 0,9998538 | NRAS       | protein_coding       |
| 0,9789623 | HNRNPA3P6  | processed_pseudogene |
| 0,9925374 | RPS7P11    | processed_pseudogene |
| 0,7542355 | CHUK       | protein_coding       |
| 0,7213265 | GSTM2      | protein_coding       |
| 0,7558125 | HSPD1P1    | processed_pseudogene |

|           |            |                                    |
|-----------|------------|------------------------------------|
| 0,623981  | RPL18AP3   | processed_pseudogene               |
| 0,9377639 | ERV3-1     | protein_coding                     |
| 0,8369686 | SYNJ2BP    | protein_coding                     |
| 0,9840915 | RBMXL1     | protein_coding                     |
| 0,8111745 | SRA1       | protein_coding                     |
| 0,9682998 | RPLP0P6    | processed_pseudogene               |
| 0,4954628 | VDAC1      | protein_coding                     |
| 0,077831  | TMX2       | protein_coding                     |
| 0,9528194 | HEXA       | protein_coding                     |
| 0,2506935 | NDUFS3     | protein_coding                     |
| 0,9984673 | RPSAP54    | processed_pseudogene               |
| 0,9994264 | LEPROT     | protein_coding                     |
| 0,0286685 | LBH        | protein_coding                     |
| 0,9625751 | PPP1CB     | protein_coding                     |
| 0,2778507 | NCKIPSD    | protein_coding                     |
| 0,5318944 | ATF6B      | protein_coding                     |
| 0,0093815 | S1PR3      | protein_coding                     |
| 0,9248086 | SLC35F6    | protein_coding                     |
| 0,993752  | HMGB1P10   | processed_pseudogene               |
| 0,9946475 | CLIC1      | protein_coding                     |
| 0,438012  | DDAH2      | protein_coding                     |
| 0,7397205 | RPS29      | protein_coding                     |
| 0,998169  | CENPBD1P1  | transcribed_processed_pseudogene   |
| 0,7743102 | AC020898.1 | processed_pseudogene               |
| 0,9479329 | ZNF134     | protein_coding                     |
| 0,893888  | ZNF845     | protein_coding                     |
| 0,7645994 | EMP2       | protein_coding                     |
| 0,9771336 | RPL21P75   | processed_pseudogene               |
| 0,8318519 | YBX1P10    | processed_pseudogene               |
| 0,730414  | RPL13AP7   | transcribed_processed_pseudogene   |
| 0,8882787 | CSNK1E     | protein_coding                     |
| 0,997931  | GALT       | protein_coding                     |
| 0,8076343 | ITGA1      | protein_coding                     |
| 0,2318378 | NUDT19     | protein_coding                     |
| 0,9225269 | NAXD       | protein_coding                     |
| 0,6591127 | GANC       | protein_coding                     |
| 0,5485366 | TTLL3      | protein_coding                     |
| 0,9907221 | REPIN1     | protein_coding                     |
| 0,7576959 | ZNF891     | protein_coding                     |
| 0,9233889 | SMIM7      | protein_coding                     |
| 0,8847715 | CPNE1      | protein_coding                     |
| 0,2337466 | SMCO1      | protein_coding                     |
| 0,7095364 | PAXIP1-AS2 | lncRNA                             |
| 0,8500846 | LYRM4      | protein_coding                     |
| 0,5879554 | AC132008.2 | transcribed_unprocessed_pseudogene |
| 0,9998538 | AMZ2P1     | transcribed_unprocessed_pseudogene |
| 0,6467114 | SMIM30     | protein_coding                     |
| 0,6319662 | EEF1A1P12  | processed_pseudogene               |
| 0,3286712 | HNRNPA1P10 | processed_pseudogene               |
| 0,9484259 | FIS1       | protein_coding                     |
| 0,9840915 | AC009053.1 | transcribed_unprocessed_pseudogene |
| 0,6653209 | NEURL1B    | protein_coding                     |
| 0,9028298 | HAUS3      | protein_coding                     |
| 0,7249384 | RPS3AP26   | processed_pseudogene               |
| 0,685088  | TUBAP2     | processed_pseudogene               |
| 0,7118106 | BBIP1      | protein_coding                     |
| 0,7268431 | LRRC37A4P  | transcribed_unprocessed_pseudogene |
| 0,8117718 | PLIN5      | protein_coding                     |
| 0,9982092 | RPL7P1     | processed_pseudogene               |

|           |            |                                    |
|-----------|------------|------------------------------------|
| 0,9953531 | PPME1      | protein_coding                     |
| 0,993752  | GTF2IRD2P1 | transcribed_unprocessed_pseudogene |
| 0,4315528 | MEG3       | lncRNA                             |
| 0,5393446 | ZNF727     | protein_coding                     |
| 0,6999614 | ZSWIM8     | protein_coding                     |
| 0,9359033 | ZBED1      | protein_coding                     |
| 0,9544158 | HNRNPUL2   | protein_coding                     |
| 0,913228  | SEPTIN7P2  | transcribed_unprocessed_pseudogene |
| 0,654521  | AC010468.1 | processed_pseudogene               |
| 0,3616153 | CYCSP55    | processed_pseudogene               |
| 0,9379013 | ZSWIM7     | protein_coding                     |
| 0,8319167 | CRPPA      | protein_coding                     |
| 0,8638437 | NPIPA7     | protein_coding                     |
| 0,8847715 | PPIAP29    | processed_pseudogene               |
| 0,9952606 | PHB2       | protein_coding                     |
| 0,4246004 | RPL13P12   | processed_pseudogene               |
| 0,685088  | EEF1A1P29  | processed_pseudogene               |
| 0,3607643 | TTC3P1     | processed_pseudogene               |
| 0,520643  | UBXN2B     | protein_coding                     |
| 0,2068936 | CBWD6      | protein_coding                     |
| 0,8061393 | AC138409.2 | transcribed_unprocessed_pseudogene |
| 0,8847411 | PEX26      | protein_coding                     |
| 0,8801614 | AC116351.1 | lncRNA                             |
| 0,1140347 | FASTKD5    | protein_coding                     |
| 0,8257564 | GOLGA8B    | protein_coding                     |
| 0,7542355 | DDX3X      | protein_coding                     |
| 0,771306  | AC127502.1 | transcribed_unprocessed_pseudogene |
| 0,9998538 | VPS16      | protein_coding                     |
| 0,4806087 | MIR99AHG   | lncRNA                             |
| 0,284683  | ZNF407     | protein_coding                     |
| 0,4153382 | HNRNPA1P7  | processed_pseudogene               |
| 0,2644142 | TMEM242    | protein_coding                     |
| 0,7883677 | TMEM167B   | protein_coding                     |
| 0,8375248 | SLC35E2A   | transcribed_unprocessed_pseudogene |
| 0,9840915 | ZC3H11B    | protein_coding                     |
| 0,5453655 | AC245297.1 | transcribed_unprocessed_pseudogene |
| 0,9112805 | AC078819.1 | processed_pseudogene               |
| 0,998169  | RPS2P55    | processed_pseudogene               |
| 0,5777776 | CCDC7      | protein_coding                     |
| 0,8247964 | FNIP1      | protein_coding                     |
| 0,565522  | RPS10P3    | processed_pseudogene               |
| 0,721162  | MORF4L1P1  | processed_pseudogene               |
| 0,3814605 | TENM3      | protein_coding                     |
| 0,5245497 | AL591135.1 | processed_pseudogene               |
| 0,7542355 | AL590867.2 | processed_pseudogene               |
| 0,3943278 | CEBPZOS    | protein_coding                     |
| 0,7954765 | AL033519.3 | processed_pseudogene               |
| 0,9523288 | AL592114.1 | processed_pseudogene               |
| 0,9412812 | AC138392.1 | processed_pseudogene               |
| 0,5982405 | NBPF1      | protein_coding                     |
| 0,9359783 | FTH1P8     | processed_pseudogene               |
| 0,997931  | UMAD1      | protein_coding                     |
| 0,9998478 | FAM228B    | protein_coding                     |
| 0,7385573 | VAMP2      | protein_coding                     |
| 0,992936  | RPL21P28   | processed_pseudogene               |
| 0,9755908 | RPL21P119  | processed_pseudogene               |
| 0,9781971 | RPL21P16   | processed_pseudogene               |
| 0,0908653 | EBF2       | protein_coding                     |
| 0,7956173 | PPP3R1     | protein_coding                     |

|           |            |                                    |
|-----------|------------|------------------------------------|
| 0,4835164 | PLXNA4     | protein_coding                     |
| 0,8992483 | CEBPD      | protein_coding                     |
| 0,7213265 | NPTXR      | protein_coding                     |
| 0,7869275 | PPP2R2A    | protein_coding                     |
| 0,7892243 | ZNF880     | protein_coding                     |
| 0,7662231 | TMEM14EP   | transcribed_processed_pseudogene   |
| 0,7571978 | APOL6      | protein_coding                     |
| 0,5825918 | FADS3      | protein_coding                     |
| 0,8189129 | CCNL2      | protein_coding                     |
| 0,7834554 | UBA52      | protein_coding                     |
| 0,0473388 | MYBPHL     | protein_coding                     |
| 0,9074092 | FAM185A    | protein_coding                     |
| 0,5994444 | CYTOR      | lncRNA                             |
| 0,9374881 | SNORA79B   | snoRNA                             |
| 0,5558351 | RNU2-64P   | snRNA                              |
| 0,855954  | FTH1P10    | transcribed_processed_pseudogene   |
| 0,9925374 | RPS26P15   | processed_pseudogene               |
| 0,7385573 | TCAF1P1    | unprocessed_pseudogene             |
| 0,6815498 | NUTM2A-AS1 | lncRNA                             |
| 0,8917504 | EXOSC6     | protein_coding                     |
| 0,6854132 | VPS52      | protein_coding                     |
| 0,9237476 | AC135983.2 | transcribed_processed_pseudogene   |
| 0,6371005 | EEF1A1P8   | processed_pseudogene               |
| 0,8721867 | LINC00630  | lncRNA                             |
| 0,6494315 | ZNF844     | protein_coding                     |
| 0,5357584 | TMSB4XP4   | processed_pseudogene               |
| 0,9670362 | NSUN5P1    | transcribed_unprocessed_pseudogene |
| 0,9379013 | CCDC18-AS1 | lncRNA                             |
| 0,0317466 | HLA-DPB1   | protein_coding                     |
| 0,77251   | OSER1-DT   | lncRNA                             |
| 0,141284  | AC117453.1 | lncRNA                             |
| 0,4954628 | AFG3L1P    | transcribed_unitary_pseudogene     |
| 0,9781971 | CHROMR     | lncRNA                             |
| 0,8721867 | SNHG14     | lncRNA                             |
| 0,9838551 | RPS24P8    | processed_pseudogene               |
| 0,5111636 | C4B        | protein_coding                     |
| 0,9077931 | HSP90AA2P  | processed_pseudogene               |
| 0,5647215 | ATXN1L     | protein_coding                     |
| 0,8417824 | SMIM13     | protein_coding                     |
| 0,4684539 | EIF4BP3    | processed_pseudogene               |
| 0,2337466 | HNRNPA1P48 | protein_coding                     |
| 0,5400662 | SVIL-AS1   | transcribed_unprocessed_pseudogene |
| 0,7528871 | RPS27AP16  | transcribed_processed_pseudogene   |
| 0,9618453 | SH3BP5-AS1 | lncRNA                             |
| 0,9901318 | NPIPA3     | protein_coding                     |
| 0,7171927 | AC093843.1 | lncRNA                             |
| 0,7154026 | RPL29P11   | processed_pseudogene               |
| 0,8500846 | YBX1P1     | processed_pseudogene               |
| 0,8093741 | NDUFAF8    | protein_coding                     |
| 0,9082846 | LINC00863  | lncRNA                             |
| 0,8745367 | LINC01266  | lncRNA                             |
| 0,4899954 | EIF4BP7    | processed_pseudogene               |
| 0,9618453 | AC004552.1 | processed_pseudogene               |
| 0,8847411 | DYNC1I2P1  | processed_pseudogene               |
| 0,7062909 | GOLGA2P7   | transcribed_unprocessed_pseudogene |
| 0,8992483 | RPSAP58    | processed_pseudogene               |
| 0,9709611 | PLEKHM1    | protein_coding                     |
| 0,7740102 | RPS15AP17  | processed_pseudogene               |
| 0,7980625 | JPX        | lncRNA                             |

|           |             |                                    |
|-----------|-------------|------------------------------------|
| 0,9068107 | NUTM2B-AS1  | lncRNA                             |
| 0,9496064 | MTND2P28    | unprocessed_pseudogene             |
| 0,6564675 | SBDSP1      | transcribed_unprocessed_pseudogene |
| 0,5140003 | HNRNPA1P35  | processed_pseudogene               |
| 0,284683  | FGD5-AS1    | lncRNA                             |
| 0,1951217 | MEG8        | lncRNA                             |
| 0,9312186 | AL080250.1  | lncRNA                             |
| 0,6491869 | ERCC6       | protein_coding                     |
| 0,4799252 | NOL7        | protein_coding                     |
| 0,9700303 | MTND1P23    | unprocessed_pseudogene             |
| 0,9692156 | AC113935.1  | processed_pseudogene               |
| 0,166375  | UQCRFS1P1   | processed_pseudogene               |
| 0,8554227 | AC009487.2  | processed_pseudogene               |
| 0,73747   | AL356124.1  | lncRNA                             |
| 0,9481776 | RPL26P19    | processed_pseudogene               |
| 0,993752  | GTF2H2B     | transcribed_unprocessed_pseudogene |
| 0,6613295 | NPY6R       | transcribed_processed_pseudogene   |
| 0,5943942 | CFLAR-AS1   | lncRNA                             |
| 0,9771336 | AC016831.1  | lncRNA                             |
| 0,3089259 | TPI1P1      | processed_pseudogene               |
| 0,7611529 | SLC16A1-AS1 | lncRNA                             |
| 0,8422763 | TMEM185B    | protein_coding                     |
| 0,9358535 | FTH1P20     | processed_pseudogene               |
| 0,7235397 | ENTPD1-AS1  | lncRNA                             |
| 0,276112  | CUTALP      | transcribed_unitary_pseudogene     |
| 0,9773277 | PGAM4       | protein_coding                     |
| 0,9481776 | LINC01359   | lncRNA                             |
| 0,6785825 | DANCR       | lncRNA                             |
| 0,5062136 | RHEBP2      | processed_pseudogene               |
| 0,9766993 | AL009174.1  | processed_pseudogene               |
| 0,9991742 | SLC8A1-AS1  | lncRNA                             |
| 0,9544158 | WDR46       | protein_coding                     |
| 0,8647372 | RPL41P1     | processed_pseudogene               |
| 0,5245497 | AC005912.1  | processed_pseudogene               |
| 0,4894579 | RPS28P7     | processed_pseudogene               |
| 0,8185595 | ZNF717      | protein_coding                     |
| 0,9424246 | WASH7P      | unprocessed_pseudogene             |
| 0,9166492 | PARG        | protein_coding                     |
| 0,9551108 | TP73-AS1    | transcribed_unitary_pseudogene     |
| 0,7836389 | AP001324.1  | processed_pseudogene               |
| 0,8212084 | AL390728.4  | transcribed_unprocessed_pseudogene |
| 0,3799892 | RD3L        | protein_coding                     |
| 0,3355997 | AC239809.3  | lncRNA                             |
| 0,3801685 | AC138969.2  | unprocessed_pseudogene             |
| 0,2332141 | HCG11       | lncRNA                             |
| 0,8348267 | MT-ATP8     | protein_coding                     |
| 0,9551148 | AL669831.1  | transcribed_unprocessed_pseudogene |
| 0,9700303 | AP006222.1  | transcribed_processed_pseudogene   |
| 0,8436853 | OST4        | protein_coding                     |
| 0,5445815 | EEF1A1P11   | processed_pseudogene               |
| 0,9998478 | AC005000.1  | processed_pseudogene               |
| 0,8183781 | SPCS2P4     | processed_pseudogene               |
| 0,7558125 | CES1P1      | transcribed_unprocessed_pseudogene |
| 0,4521055 | ARL17B      | protein_coding                     |
| 0,9010513 | DHFR        | protein_coding                     |
| 0,7296863 | LINC01128   | lncRNA                             |
| 0,9705617 | RPS13P2     | processed_pseudogene               |
| 0,8155634 | RPL41       | protein_coding                     |
| 0,9874145 | AC026403.1  | processed_pseudogene               |

|           |            |                                    |
|-----------|------------|------------------------------------|
| 0,8495694 | AC006001.3 | transcribed_unprocessed_pseudogene |
| 0,993752  | TTY10      | lncRNA                             |
| 0,8597029 | LINC00710  | lncRNA                             |
| 0,7086114 | MTCO2P12   | unprocessed_pseudogene             |
| 0,8992483 | DPY19LIP1  | unprocessed_pseudogene             |
| 0,8185595 | RALGAPA1P1 | processed_pseudogene               |
| 0,9994264 | AC092155.2 | processed_pseudogene               |
| 0,997931  | RPL21P93   | processed_pseudogene               |
| 0,9794449 | MBNL1-AS1  | lncRNA                             |
| 0,9086283 | RPL4P4     | processed_pseudogene               |
| 0,6371005 | NAMPTP1    | processed_pseudogene               |
| 0,7149965 | AL589880.1 | processed_pseudogene               |
| 0,8025062 | EIF4EP2    | processed_pseudogene               |
| 0,6762366 | RPL10P6    | processed_pseudogene               |
| 0,8698319 | AC006059.1 | lncRNA                             |
| 0,6903585 | ACBD6      | protein_coding                     |
| 0,9678404 | AL450405.1 | processed_pseudogene               |
| 0,9839612 | FTH1P5     | processed_pseudogene               |
| 0,855954  | RPL4P5     | processed_pseudogene               |
| 0,8197846 | AC078817.1 | processed_pseudogene               |
| 0,7740102 | GOLGA6L5P  | transcribed_unprocessed_pseudogene |
| 0,9730551 | AC009245.1 | processed_pseudogene               |
| 0,9900815 | TCEA1P2    | processed_pseudogene               |
| 0,9921186 | AC021078.1 | lncRNA                             |
| 0,9731251 | FTX        | lncRNA                             |
| 0,2737133 | AC092683.1 | lncRNA                             |
| 0,7984578 | RPS23P8    | processed_pseudogene               |
| 0,9666028 | DNM3OS     | lncRNA                             |
| 0,0125259 | LINC02541  | lncRNA                             |
| 0,3450085 | HSBP1      | protein_coding                     |
| 0,998169  | RPL7P32    | processed_pseudogene               |
| 0,9700303 | HCG18      | lncRNA                             |
| 0,3428257 | VDAC1P6    | processed_pseudogene               |
| 0,931978  | WARS2-AS1  | lncRNA                             |
| 0,077831  | HLA-DPA1   | protein_coding                     |
| 0,8221205 | RPS18      | protein_coding                     |
| 0,8387664 | DLEU2      | lncRNA                             |
| 0,7177328 | LINC-PINT  | lncRNA                             |
| 0,8213028 | AC079922.1 | processed_pseudogene               |
| 0,7607016 | AL159166.1 | lncRNA                             |
| 0,7820981 | TAPBP      | protein_coding                     |
| 0,7740102 | ANXA2P2    | processed_pseudogene               |
| 0,673546  | TMA7       | protein_coding                     |
| 0,3435112 | MCTS1      | protein_coding                     |
| 0,9998478 | FTH1P7     | processed_pseudogene               |
| 0,3278973 | AL078590.2 | lncRNA                             |
| 0,7451695 | RPS3AP25   | processed_pseudogene               |
| 0,4887663 | SMIM26     | protein_coding                     |
| 0,5679388 | RPL3P4     | processed_pseudogene               |
| 0,7968733 | KANTR      | protein_coding                     |
| 0,6383874 | GOLGA8N    | protein_coding                     |
| 0,5996432 | LINC00342  | lncRNA                             |
| 0,8575378 | NPIPA9     | protein_coding                     |
| 0,4954628 | AC097523.1 | processed_pseudogene               |
| 0,6244656 | EEF1A1P14  | processed_pseudogene               |
| 0,466638  | LINC00702  | lncRNA                             |
| 0,6475905 | AL161457.2 | lncRNA                             |
| 0,7546576 | LINC00472  | lncRNA                             |
| 0,9848567 | RPL21P134  | processed_pseudogene               |

|           |            |                                    |
|-----------|------------|------------------------------------|
| 0,7972313 | GPX1       | protein_coding                     |
| 0,5117223 | GTF2IP4    | transcribed_processed_pseudogene   |
| 0,9067454 | LINC01719  | lncRNA                             |
| 0,4835164 | EIF3FP3    | processed_pseudogene               |
| 0,4919058 | EEF1A1P6   | processed_pseudogene               |
| 0,6613295 | LINC00513  | lncRNA                             |
| 0,8364227 | AC098617.1 | lncRNA                             |
| 0,6244656 | RPL10P9    | processed_pseudogene               |
| 0,997931  | RPS28      | protein_coding                     |
| 0,3503253 | UQCRHL     | protein_coding                     |
| 0,8373546 | TRIM26     | protein_coding                     |
| 0,633922  | AP000936.3 | processed_pseudogene               |
| 0,5777776 | AC099560.2 | processed_pseudogene               |
| 0,7467854 | AC009264.1 | lncRNA                             |
| 0,9538485 | RPS26P47   | processed_pseudogene               |
| 0,8133591 | ZNF37BP    | transcribed_processed_pseudogene   |
| 0,9333994 | ZNF736     | protein_coding                     |
| 0,9374738 | MAGI2-AS3  | lncRNA                             |
| 0,8176511 | RPL13AP20  | processed_pseudogene               |
| 0,3098192 | AC018464.1 | lncRNA                             |
| 0,8500846 | FAM133B    | protein_coding                     |
| 0,9771336 | CCT6P3     | transcribed_unprocessed_pseudogene |
| 0,90504   | JRK        | protein_coding                     |
| 0,8640757 | RPSAP9     | processed_pseudogene               |
| 0,5074563 | AL162151.2 | processed_pseudogene               |
| 0,9484395 | SDCBP2-AS1 | lncRNA                             |
| 0,2337466 | GAS5       | lncRNA                             |
| 0,8992483 | AC144530.1 | processed_pseudogene               |
| 0,673546  | HLA-B      | protein_coding                     |
| 0,7102291 | RPS3AP6    | processed_pseudogene               |
| 0,9248086 | RPL23AP42  | processed_pseudogene               |
| 0,0386353 | FABP5P7    | processed_pseudogene               |
| 0,9934381 | FTH1P2     | processed_pseudogene               |
| 0,6475905 | MLIP-AS1   | lncRNA                             |
| 0,5600133 | ZSCAN31    | protein_coding                     |
| 0,7934662 | LINC02248  | lncRNA                             |
| 0,7972313 | RPL39P3    | processed_pseudogene               |
| 0,9944531 | DANT2      | lncRNA                             |
| 0,9934576 | ITGA9-AS1  | lncRNA                             |
| 0,6206631 | DPY19L2P4  | transcribed_unprocessed_pseudogene |
| 0,5943942 | LINC01278  | lncRNA                             |
| 0,9312186 | RPS2P7     | processed_pseudogene               |
| 0,9840915 | TRDN-AS1   | lncRNA                             |
| 0,9479329 | RPL6P27    | transcribed_processed_pseudogene   |
| 0,7433064 | AL356599.1 | lncRNA                             |
| 0,888621  | H3F3AP4    | processed_pseudogene               |
| 0,4894579 | LINC00894  | lncRNA                             |
| 0,2443993 | KIAA0040   | protein_coding                     |
| 0,8889668 | TTC28-AS1  | lncRNA                             |
| 0,8854446 | COX10-AS1  | lncRNA                             |
| 0,3694563 | ZBED5      | protein_coding                     |
| 0,9238608 | VLDLR-AS1  | lncRNA                             |
| 0,8711676 | FAM157A    | transcribed_unprocessed_pseudogene |
| 0,645515  | AC099336.2 | processed_pseudogene               |
| 0,9998538 | H3F3BP1    | processed_pseudogene               |
| 0,6835435 | RPL13AP5   | processed_pseudogene               |
| 0,5462026 | STARD13-AS | lncRNA                             |
| 0,8992483 | BCYRN1     | scRNA                              |
| 0,4498511 | TMSB4XP1   | processed_pseudogene               |

|           |             |                                    |
|-----------|-------------|------------------------------------|
| 0,8212084 | AL732372.2  | transcribed_unprocessed_pseudogene |
| 0,9976952 | HAND2-AS1   | lncRNA                             |
| 0,4148453 | NR2F1-AS1   | lncRNA                             |
| 0,7258405 | CDKN2AIPNL  | protein_coding                     |
| 0,2814709 | BMS1P10     | transcribed_unprocessed_pseudogene |
| 0,7673209 | SMG1P1      | transcribed_unprocessed_pseudogene |
| 0,7952381 | TTN-AS1     | lncRNA                             |
| 0,7065438 | ZNF737      | protein_coding                     |
| 0,9933219 | RGL2        | protein_coding                     |
| 0,4894579 | LINC01409   | lncRNA                             |
| 0,9951314 | RPSAP15     | processed_pseudogene               |
| 0,7609122 | AC243919.1  | transcribed_processed_pseudogene   |
| 0,2945575 | AL138828.1  | lncRNA                             |
| 0,2318378 | UQCRBP1     | processed_pseudogene               |
| 0,9360637 | FAM200B     | protein_coding                     |
| 0,8703454 | MTCO1P12    | unprocessed_pseudogene             |
| 0,7740102 | FLG-AS1     | lncRNA                             |
| 0,9994264 | PTENP1      | transcribed_processed_pseudogene   |
| 0,8229361 | CELF2-AS2   | lncRNA                             |
| 0,5123978 | LRRC37A2    | protein_coding                     |
| 0,7278987 | RPL9P7      | processed_pseudogene               |
| 0,9994264 | SCARNA7     | scaRNA                             |
| 0,5111636 | AC008026.1  | processed_pseudogene               |
| 0,8117718 | RNF103      | protein_coding                     |
| 0,8833312 | RBM14       | protein_coding                     |
| 0,9700639 | AC011979.1  | processed_pseudogene               |
| 0,2430128 | KLHL41      | protein_coding                     |
| 0,9703483 | AL157392.3  | lncRNA                             |
| 0,9781971 | RPL21P39    | processed_pseudogene               |
| 0,81098   | PARGP1      | transcribed_unprocessed_pseudogene |
| 0,721162  | RN7SL674P   | misc_RNA                           |
| 0,9808899 | AC104563.1  | processed_pseudogene               |
| 0,8928206 | AMY2B       | protein_coding                     |
| 0,8695843 | RPSAP12     | processed_pseudogene               |
| 0,7912354 | PCDHGC3     | protein_coding                     |
| 0,9450135 | ZNF542P     | transcribed_unprocessed_pseudogene |
| 0,8720083 | RPS2P5      | processed_pseudogene               |
| 0,9367988 | PPIL3       | protein_coding                     |
| 0,654521  | AC010343.1  | processed_pseudogene               |
| 0,8704958 | FOXO3B      | protein_coding                     |
| 0,9865636 | AQP1        | protein_coding                     |
| 0,9968825 | AC106872.2  | processed_pseudogene               |
| 0,2164941 | RDH14       | protein_coding                     |
| 0,7954765 | RN7SL128P   | misc_RNA                           |
| 0,42916   | RPL15P2     | processed_pseudogene               |
| 0,9668896 | NSUN6       | protein_coding                     |
| 0,0998266 | LINC00881   | lncRNA                             |
| 0,5740917 | ADAMTS9-AS1 | lncRNA                             |
| 0,9767278 | CRCP        | protein_coding                     |
| 0,6219816 | SUCLG2-AS1  | lncRNA                             |
| 0,855954  | CD302       | protein_coding                     |
| 0,6305527 | EEF1A1P25   | processed_pseudogene               |
| 0,8632351 | RPL7P19     | processed_pseudogene               |
| 0,2127154 | ATP5MF      | protein_coding                     |
| 0,4954628 | PSMC1P1     | processed_pseudogene               |
| 0,5175488 | GUSBP2      | transcribed_unprocessed_pseudogene |
| 0,8834615 | ARPC4       | protein_coding                     |
| 0,9345529 | ZBTB20-AS1  | lncRNA                             |
| 0,9917279 | AC114728.1  | processed_pseudogene               |



|           |             |                                    |
|-----------|-------------|------------------------------------|
| 0,138108  | INMT        | protein_coding                     |
| 0,4810647 | ADAMTS9-AS2 | lncRNA                             |
| 0,9360637 | ARPC1A      | protein_coding                     |
| 0,1326966 | ATP5PO      | protein_coding                     |
| 0,9533676 | PLEKHO2     | protein_coding                     |
| 0,7154026 | AL627309.5  | lncRNA                             |
| 0,9484395 | PISD        | protein_coding                     |
| 0,9621537 | PI4KA       | protein_coding                     |
| 0,4585504 | RPL7AP6     | processed_pseudogene               |
| 0,6604792 | MUC20-OT1   | lncRNA                             |
| 0,7576959 | CRYZL2P     | transcribed_unitary_pseudogene     |
| 0,4835164 | ARFGAP3     | protein_coding                     |
| 0,9803555 | C22orf39    | protein_coding                     |
| 0,9374881 | AC073861.1  | processed_pseudogene               |
| 0,8545769 | EIF6        | protein_coding                     |
| 0,3280381 | MRPL20      | protein_coding                     |
| 0,6216638 | ARPIN       | protein_coding                     |
| 0,9768456 | RPL21P11    | processed_pseudogene               |
| 0,624851  | LINC00882   | lncRNA                             |
| 0,993752  | AC107032.1  | processed_pseudogene               |
| 0,1131434 | MRPL33      | protein_coding                     |
| 0,8003414 | MICAL3      | protein_coding                     |
| 0,9312186 | AC087343.1  | processed_pseudogene               |
| 0,9544158 | AC115223.1  | processed_pseudogene               |
| 0,9813581 | STON1       | protein_coding                     |
| 0,8441592 | STMP1       | protein_coding                     |
| 0,7563025 | KCTD7       | protein_coding                     |
| 0,4697514 | DUBR        | lncRNA                             |
| 0,855954  | NPIPB5      | protein_coding                     |
| 0,305334  | MRPS6       | protein_coding                     |
| 0,9540553 | ZNF512      | protein_coding                     |
| 0,8481719 | NFS1        | protein_coding                     |
| 0,9860501 | AC093591.1  | processed_pseudogene               |
| 0,9781148 | DDOST       | protein_coding                     |
| 0,8786805 | AC110749.1  | processed_pseudogene               |
| 0,8791163 | AC004889.1  | lncRNA                             |
| 0,7842247 | AC133134.1  | processed_pseudogene               |
| 0,6883842 | AC024293.1  | processed_pseudogene               |
| 0,9900268 | RPL7P23     | processed_pseudogene               |
| 0,9832186 | AC116533.1  | processed_pseudogene               |
| 0,1225394 | ETV5        | protein_coding                     |
| 0,9377639 | RBM12       | protein_coding                     |
| 0,9976739 | APOBEC3C    | protein_coding                     |
| 0,6610925 | RN7SL396P   | misc_RNA                           |
| 0,4835164 | FCGR2C      | polymorphic_pseudogene             |
| 0,9270004 | BX679664.3  | processed_pseudogene               |
| 0,5267449 | C4A         | protein_coding                     |
| 0,1500522 | HBB         | protein_coding                     |
| 0,8769713 | N4BP2L2     | protein_coding                     |
| 0,7912354 | GABPB1-AS1  | lncRNA                             |
| 0,4999985 | EEF1A1P4    | processed_pseudogene               |
| 0,59951   | NEAT1       | lncRNA                             |
| 0,284683  | LINC02211   | lncRNA                             |
| 0,8062191 | ZNF585B     | protein_coding                     |
| 0,358645  | SNHG6       | lncRNA                             |
| 0,5879554 | LINC01184   | lncRNA                             |
| 0,7954765 | AC093752.1  | transcribed_unprocessed_pseudogene |
| 0,2841212 | RAB30-DT    | lncRNA                             |
| 0,9665816 | RASSF8-AS1  | lncRNA                             |

|           |              |                                    |
|-----------|--------------|------------------------------------|
| 0,9476644 | H2AFJ        | protein_coding                     |
| 0,6591549 | STARD4-AS1   | lncRNA                             |
| 0,7972313 | PGAM5        | protein_coding                     |
| 0,3454701 | MIR4458HG    | lncRNA                             |
| 0,933129  | OIP5-AS1     | lncRNA                             |
| 0,6403073 | CKMT2-AS1    | lncRNA                             |
| 0,9296784 | MTND4P12     | processed_pseudogene               |
| 0,7395968 | NR2F2-AS1    | lncRNA                             |
| 0,5364552 | TMEM161B-AS1 | lncRNA                             |
| 0,9364287 | FAM13A-AS1   | lncRNA                             |
| 0,6785825 | NNT-AS1      | lncRNA                             |
| 0,8786805 | RRN3P1       | transcribed_unprocessed_pseudogene |
| 0,7992396 | ADH1C        | protein_coding                     |
| 0,6463814 | AC093879.1   | lncRNA                             |
| 0,9781971 | TNXA         | unprocessed_pseudogene             |
| 0,504498  | LUCAT1       | lncRNA                             |
| 0,8850069 | CDK11B       | protein_coding                     |
| 0,8326738 | WHAMMP2      | transcribed_unprocessed_pseudogene |
| 0,7125689 | POU5F2       | protein_coding                     |
| 0,9917279 | MTATP6P1     | unprocessed_pseudogene             |
| 0,9165105 | AC046134.2   | lncRNA                             |
| 0,7355147 | TMEM150C     | protein_coding                     |
| 0,7057791 | EEF1A1P9     | processed_pseudogene               |
| 0,8745367 | NPM1P27      | processed_pseudogene               |
| 0,8971058 | NAIP         | protein_coding                     |
| 0,2332141 | CARMN        | lncRNA                             |
| 0,6593174 | AC011330.1   | unprocessed_pseudogene             |
| 0,3881918 | EEF1A1P19    | processed_pseudogene               |
| 0,1052063 | AC087457.1   | lncRNA                             |
| 0,7395639 | AC106791.1   | lncRNA                             |
| 0,5248895 | EEF1A1P13    | processed_pseudogene               |
| 0,1356666 | LINC02762    | lncRNA                             |
| 0,1835405 | TRMT9B       | protein_coding                     |
| 0,9368504 | ZNF718       | protein_coding                     |
| 0,4430813 | SMIM20       | protein_coding                     |
| 0,5170218 | CHCHD10      | protein_coding                     |
| 0,4161706 | AC007126.1   | lncRNA                             |
| 0,7558125 | SELENOP      | protein_coding                     |
| 0,4748134 | LINC02208    | lncRNA                             |
| 0,9082846 | GMDS-DT      | lncRNA                             |
| 0,9296784 | THAP9-AS1    | lncRNA                             |
| 0,7673209 | AC087854.1   | lncRNA                             |
| 0,8823913 | AF117829.1   | lncRNA                             |
| 0,9479329 | AC131392.2   | unprocessed_pseudogene             |
| 0,5531846 | SHANK3       | protein_coding                     |
| 0,9618453 | ZNF550       | protein_coding                     |
| 0,7842247 | MALAT1       | lncRNA                             |
| 0,7940001 | AC104825.1   | lncRNA                             |
| 0,768388  | AC145138.1   | unprocessed_pseudogene             |
| 0,3772742 | SCARNA6      | scaRNA                             |
| 0,3616153 | SCARNA5      | scaRNA                             |
| 0,3697716 | RNY4         | misc_RNA                           |
| 0,512885  | SCARNA21     | scaRNA                             |
| 0,5847346 | GUSBP3       | transcribed_unprocessed_pseudogene |
| 0,3894807 | C8orf88      | protein_coding                     |
| 0,7025012 | CCDC71L      | protein_coding                     |
| 0,9343701 | AC092828.1   | lncRNA                             |
| 0,7956173 | PCDHGB6      | protein_coding                     |
| 0,7118106 | TUG1         | protein_coding                     |

|           |             |                                    |
|-----------|-------------|------------------------------------|
| 0,2915153 | AC139272.1  | unprocessed_pseudogene             |
| 0,1996599 | TRNP1       | protein_coding                     |
| 0,8079393 | ALG11       | protein_coding                     |
| 0,7687718 | ATXN7L3B    | protein_coding                     |
| 0,6285359 | PRKDC       | protein_coding                     |
| 0,888621  | PCDHGA6     | protein_coding                     |
| 0,5567171 | OTUD6B-AS1  | lncRNA                             |
| 0,4894579 | AC138866.1  | unprocessed_pseudogene             |
| 0,7688687 | PCDHGA10    | protein_coding                     |
| 0,8185595 | ZNF260      | protein_coding                     |
| 0,9439974 | LYN         | protein_coding                     |
| 0,998169  | PCDHGB7     | protein_coding                     |
| 0,8381234 | NPIPB11     | protein_coding                     |
| 0,2656432 | AC112191.2  | processed_pseudogene               |
| 0,9464798 | SMG1P6      | unprocessed_pseudogene             |
| 0,9066034 | WAC-AS1     | lncRNA                             |
| 0,9510167 | FPGT        | protein_coding                     |
| 0,2737133 | AC138866.2  | unprocessed_pseudogene             |
| 0,5590581 | GVINP1      | transcribed_unprocessed_pseudogene |
| 0,8721281 | NPIPA2      | protein_coding                     |
| 0,921128  | BRK1        | protein_coding                     |
| 0,7385573 | CHMP1B      | protein_coding                     |
| 0,6403073 | MIR100HG    | lncRNA                             |
| 0,7558125 | EID1        | protein_coding                     |
| 0,5267449 | TBX5-AS1    | lncRNA                             |
| 0,8829558 | POLR2M      | protein_coding                     |
| 0,7988401 | AC084357.3  | transcribed_unprocessed_pseudogene |
| 0,6238595 | SNHG1       | lncRNA                             |
| 0,8492407 | MTRNR2L8    | protein_coding                     |
| 0,7558125 | CACNA1C-AS4 | lncRNA                             |
| 0,2137007 | CTSO        | protein_coding                     |
| 0,3004311 | COA8        | protein_coding                     |
| 0,9269165 | ZNF432      | protein_coding                     |
| 0,9738194 | ZNF10       | protein_coding                     |
| 0,9902795 | SMIM3       | protein_coding                     |
| 0,8873508 | RPL41P2     | processed_pseudogene               |
| 0,8176511 | RPL41P5     | processed_pseudogene               |
| 0,5015091 | SMIM10L1    | protein_coding                     |
| 0,9194118 | ZNF350      | protein_coding                     |
| 0,7146386 | PLBD1-AS1   | lncRNA                             |
| 0,8259599 | ZNF253      | protein_coding                     |
| 0,3309793 | HP          | protein_coding                     |
| 0,993752  | AC010186.3  | lncRNA                             |
| 0,9907262 | DENND11     | protein_coding                     |
| 0,4321437 | LSM14A      | protein_coding                     |
| 0,6854132 | AC009318.1  | lncRNA                             |
| 0,9914435 | GATC        | protein_coding                     |
| 0,5402971 | ZNF271P     | transcribed_unitary_pseudogene     |
| 0,4425571 | AC048341.1  | lncRNA                             |
| 0,0736295 | OVCH1-AS1   | lncRNA                             |
| 0,784306  | PSMA3-AS1   | lncRNA                             |
| 0,6473313 | CUX1        | protein_coding                     |
| 0,9234217 | CHURC1      | protein_coding                     |
| 0,6651002 | LINC00641   | lncRNA                             |
| 0,9438763 | HIF1A-AS3   | lncRNA                             |
| 0,7821595 | CEP95       | protein_coding                     |
| 0,654521  | FPGT-TNNI3K | protein_coding                     |
| 0,8875885 | CSPG4P12    | transcribed_unprocessed_pseudogene |
| 0,7662231 | AF111167.2  | lncRNA                             |

|           |            |                                    |
|-----------|------------|------------------------------------|
| 0,4684539 | INAFM2     | protein_coding                     |
| 0,949756  | HMGB1P6    | processed_pseudogene               |
| 0,7182975 | AC083843.3 | lncRNA                             |
| 0,6727601 | RBM15B     | protein_coding                     |
| 0,1216048 | AC107068.1 | lncRNA                             |
| 0,1356666 | NORAD      | lncRNA                             |
| 0,9772493 | NSFP1      | unprocessed_pseudogene             |
| 0,4827579 | AC104083.1 | lncRNA                             |
| 0,1729437 | MRC1       | protein_coding                     |
| 0,7842706 | FAM157C    | lncRNA                             |
| 0,9544158 | ERVK13-1   | lncRNA                             |
| 0,8578793 | ANKRD20A1  | protein_coding                     |
| 0,9738194 | CCPG1      | protein_coding                     |
| 0,7639764 | TMEM178B   | protein_coding                     |
| 0,8922683 | LINC01355  | lncRNA                             |
| 0,6184746 | PECAM1     | protein_coding                     |
| 0,0640162 | PDCD6IPP2  | transcribed_unprocessed_pseudogene |
| 0,817424  | AC233699.1 | unprocessed_pseudogene             |
| 0,9296784 | AL137782.1 | lncRNA                             |
| 0,8316952 | SMG1P7     | transcribed_unprocessed_pseudogene |
| 0,5537742 | GAN        | protein_coding                     |
| 0,2419676 | HPR        | protein_coding                     |
| 0,9808899 | AC007406.5 | lncRNA                             |
| 0,7258655 | LINC00662  | lncRNA                             |
| 0,4161706 | SNORD3B-2  | snoRNA                             |
| 0,4521055 | SPON1      | protein_coding                     |
| 0,8322139 | AC005670.3 | lncRNA                             |
| 0,633922  | MTCO1P40   | processed_pseudogene               |
| 0,6023346 | GTF2I      | protein_coding                     |
| 0,9914435 | ZNF234     | protein_coding                     |
| 0,5879554 | ROCK1P1    | transcribed_unprocessed_pseudogene |
| 0,3715255 | MYZAP      | protein_coding                     |
| 0,9802452 | RPS7P1     | processed_pseudogene               |
| 0,1904085 | SRSF8      | protein_coding                     |
| 0,9248086 | UBBP4      | transcribed_unprocessed_pseudogene |
| 0,7182975 | RN7SL4P    | misc_RNA                           |
| 0,5768067 | LINC00667  | lncRNA                             |
| 0,5170218 | SNORD3A    | snoRNA                             |
| 0,6903585 | NBPF11     | protein_coding                     |
| 0,8318664 | AC015813.1 | lncRNA                             |
| 0,4662823 | LINC00909  | lncRNA                             |
| 0,8258095 | AC016596.3 | processed_pseudogene               |
| 0,6828036 | NOTCH2NLA  | protein_coding                     |
| 0,6574161 | DYNLL2     | protein_coding                     |
| 0,5964345 | OTUD7B     | protein_coding                     |
| 0,7242009 | SUZ12P1    | transcribed_unprocessed_pseudogene |
| 0,4890796 | SNORD3C    | snoRNA                             |
| 0,6444859 | GJA5       | protein_coding                     |
| 0,4266067 | MIR133A1HG | lncRNA                             |
| 0,5170218 | SNORD3B-1  | snoRNA                             |
| 0,9067454 | RBM8A      | protein_coding                     |
| 0,1140347 | TIMM23     | protein_coding                     |
| 0,54642   | RNF115     | protein_coding                     |
| 0,7024923 | RN7SL5P    | misc_RNA                           |
| 0,8189129 | SEC22B     | protein_coding                     |
| 0,9476644 | FSBP       | protein_coding                     |
| 0,768388  | TXNIP      | protein_coding                     |
| 0,9998478 | MIR3609    | miRNA                              |
| 0,7921707 | SRGAP2     | protein_coding                     |

|           |             |                                    |
|-----------|-------------|------------------------------------|
| 0,6254273 | RASSF5      | protein_coding                     |
| 0,874513  | STRADA      | protein_coding                     |
| 0,5688668 | NBPF15      | protein_coding                     |
| 0,3881918 | NCOA4       | protein_coding                     |
| 0,3286712 | MRPS21      | protein_coding                     |
| 0,7816527 | MYO15B      | protein_coding                     |
| 0,9954421 | AC060780.1  | lncRNA                             |
| 0,4018815 | LRRC37A16P  | transcribed_unprocessed_pseudogene |
| 0,8575378 | ZNF850      | protein_coding                     |
| 0,4413743 | AC020916.1  | lncRNA                             |
| 0,7199013 | MTCO2P2     | processed_pseudogene               |
| 0,9424246 | ZNF224      | protein_coding                     |
| 0,9802452 | AC010680.1  | lncRNA                             |
| 0,7771859 | NBPF12      | protein_coding                     |
| 0,7755905 | AC005261.1  | lncRNA                             |
| 0,5360859 | FAM156A     | protein_coding                     |
| 0,5851976 | AC092279.1  | lncRNA                             |
| 0,8258207 | AC092070.2  | transcribed_unprocessed_pseudogene |
| 0,654521  | MTRNR2L12   | protein_coding                     |
| 0,7385573 | ZNF728      | protein_coding                     |
| 0,7182975 | ZSCAN16-AS1 | lncRNA                             |
| 0,9729242 | ZNF587B     | protein_coding                     |
| 0,9884562 | AC022149.1  | processed_pseudogene               |
| 0,9861632 | TMEM185A    | protein_coding                     |
| 0,5869808 | NBPF9       | protein_coding                     |
| 0,7713242 | KCNQ1OT1    | lncRNA                             |
| 0,7025012 | SNHG8       | lncRNA                             |
| 0,8222645 | AL158152.1  | lncRNA                             |
| 0,8865445 | BMS1P7      | transcribed_unprocessed_pseudogene |
| 0,6337897 | NBPF8       | transcribed_unprocessed_pseudogene |
| 0,5491629 | NBPF14      | protein_coding                     |
| 0,933129  | TAF15       | protein_coding                     |
| 0,7062909 | SRGAP2D     | unprocessed_pseudogene             |
| 0,9112805 | NUDT4P2     | processed_pseudogene               |
| 0,8682799 | AC016831.5  | lncRNA                             |
| 0,4680251 | AC240274.1  | protein_coding                     |
| 0,7433064 | 7SK         | misc_RNA                           |
| 0,7673209 | AC010680.5  | lncRNA                             |
| 0,4673249 | NBPF10      | protein_coding                     |
| 0,9829971 | Z83843.1    | lncRNA                             |
| 0,2945575 | LIX1L       | protein_coding                     |
| 0,9628671 | LINC01954   | lncRNA                             |
| 0,768388  | GTF2H5      | protein_coding                     |
| 0,5688668 | RNU6-6P     | snRNA                              |
| 0,4894579 | NBPF25P     | transcribed_unprocessed_pseudogene |
| 0,6745473 | CASC15      | lncRNA                             |
| 0,8578793 | AL021368.2  | lncRNA                             |
| 0,9817008 | AC093297.2  | lncRNA                             |
| 0,8941532 | POM121C     | protein_coding                     |
| 0,9808899 | LINC01145   | transcribed_unprocessed_pseudogene |
| 0,7844757 | ZNF595      | protein_coding                     |
| 0,7740102 | DCP1A       | protein_coding                     |
| 0,7025012 | LINC01578   | lncRNA                             |
| 0,8674075 | AC008124.1  | lncRNA                             |
| 0,9221671 | FAM106A     | lncRNA                             |
| 0,7740102 | LINC02035   | lncRNA                             |
| 0,5911872 | NBPF26      | protein_coding                     |
| 0,806856  | AC058791.1  | lncRNA                             |
| 0,9112805 | CWC25       | protein_coding                     |

|           |            |                                    |
|-----------|------------|------------------------------------|
| 0,5985056 | SMIM11B    | protein_coding                     |
| 0,8966801 | ZNHIT3     | protein_coding                     |
| 0,7472452 | AC020904.2 | transcribed_processed_pseudogene   |
| 0,9385376 | AL592183.1 | protein_coding                     |
| 0,7321942 | CYFIP1     | protein_coding                     |
| 0,6999614 | U1         | snRNA                              |
| 0,5511615 | TAF9       | protein_coding                     |
| 0,658029  | CASTOR2    | protein_coding                     |
| 0,6663173 | SOCS7      | protein_coding                     |
| 0,7743102 | AC245297.3 | lncRNA                             |
| 0,5742684 | CU633967.1 | lncRNA                             |
| 0,5943942 | ZNF658     | protein_coding                     |
| 0,9237476 | AC244154.1 | transcribed_unprocessed_pseudogene |
| 0,943695  | RCC1L      | protein_coding                     |
| 0,9933219 | AC233968.1 | unprocessed_pseudogene             |
| 0,5799813 | AC244669.2 | unprocessed_pseudogene             |
| 0,6918332 | MLLT6      | protein_coding                     |
| 0,5799813 | PPP4R3B    | protein_coding                     |
| 0,5647201 | SYNRG      | protein_coding                     |
| 0,8887908 | AC241952.1 | transcribed_unprocessed_pseudogene |
| 0,4314663 | PDCD6IPP1  | transcribed_unprocessed_pseudogene |
| 0,6613295 | U1         | snRNA                              |
| 0,8500846 | AATF       | protein_coding                     |
| 0,9977992 | ARHGAP23   | protein_coding                     |
| 0,9803555 | TUBGCP5    | protein_coding                     |
| 0,6160654 | U2AF1L5    | protein_coding                     |
| 0,1112135 | SIK1B      | protein_coding                     |
| 0,9738194 | DUSP14     | protein_coding                     |
| 0,5510556 | CU633904.1 | lncRNA                             |
| 0,9635114 | WHAMMP3    | transcribed_unprocessed_pseudogene |
| 0,73747   | RN7SL1     | misc_RNA                           |
| 0,9132055 | ANKRD20A3  | protein_coding                     |
| 0,9925374 | TADA2A     | protein_coding                     |
| 0,7456311 | FRG1HP     | transcribed_unprocessed_pseudogene |
| 0,6137496 | PIP4K2B    | protein_coding                     |
| 0,3030424 | CNTNAP3P2  | unprocessed_pseudogene             |
| 0,3694563 | HERC2P2    | transcribed_unprocessed_pseudogene |
| 0,673546  | HIST1H4E   | protein_coding                     |
| 0,1527123 | HYDIN2     | transcribed_unprocessed_pseudogene |
| 0,5552067 | GTF2IP1    | transcribed_unprocessed_pseudogene |
| 0,5768067 | CU634019.1 | lncRNA                             |
| 0,8062191 | STAG3L2    | transcribed_unprocessed_pseudogene |
| 0,9003006 | HIST1H4D   | protein_coding                     |
| 0,7087026 | SEC22B4P   | transcribed_unprocessed_pseudogene |
| 0,4848227 | MARCKS     | protein_coding                     |
| 0,1326966 | AC159540.2 | lncRNA                             |
| 0,0002507 | TRAC       | TR_C_gene                          |
| 0,59951   | PGM5P2     | transcribed_unprocessed_pseudogene |
| 0,1916186 | PSMB3      | protein_coding                     |
| 0,6818653 | U1         | snRNA                              |
| 0,4761054 | FP236241.1 | lncRNA                             |
| 0,6938931 | DDX52      | protein_coding                     |
| 0,9376695 | ZNF8       | protein_coding                     |
| 0,5511615 | MYO19      | protein_coding                     |
| 0,9486004 | GGNBP2     | protein_coding                     |
| 0,9332245 | ZNF229     | protein_coding                     |
| 0,4372336 | ACACA      | protein_coding                     |
| 0,3316892 | AC005332.6 | lncRNA                             |
| 0,6762366 | RN7SL3     | misc_RNA                           |

|           |             |                                    |
|-----------|-------------|------------------------------------|
| 0,621558  | MRPL45      | protein_coding                     |
| 0,9069375 | CR381670.1  | unprocessed_pseudogene             |
| 0,1352238 | AC093909.6  | TEC                                |
| 0,8275847 | AC003681.1  | lncRNA                             |
| 0,7154026 | AC009951.4  | TEC                                |
| 0,997931  | TSTD3       | protein_coding                     |
| 0,7384592 | AL136164.3  | TEC                                |
| 0,9154352 | Z99129.4    | TEC                                |
| 0,9536474 | WASH9P      | unprocessed_pseudogene             |
| 0,8824701 | AC090498.1  | processed_pseudogene               |
| 0,8992483 | AC009948.4  | TEC                                |
| 0,9162577 | AC131649.2  | TEC                                |
| 0,281424  | AQP7P3      | unprocessed_pseudogene             |
| 0,9682998 | BCLAF1P2    | processed_pseudogene               |
| 0,5119861 | AL353763.2  | TEC                                |
| 0,9424246 | PLAC4       | lncRNA                             |
| 0,7820618 | AL662795.2  | TEC                                |
| 0,9505993 | AC027290.2  | TEC                                |
| 0,9347995 | AC093908.1  | TEC                                |
| 0,3459301 | AP001528.2  | TEC                                |
| 0,9738194 | AC000123.3  | TEC                                |
| 0,7835684 | Z95331.1    | lncRNA                             |
| 0,7836389 | AP000648.4  | TEC                                |
| 0,9893136 | FP565260.6  | protein_coding                     |
| 0,3872426 | FP236383.4  | lncRNA                             |
| 0,8834615 | EIF1B-AS1   | lncRNA                             |
| 0,4628071 | FP671120.6  | lncRNA                             |
| 0,7213265 | N4BP2L2-IT2 | lncRNA                             |
| 0,633922  | FP236383.5  | lncRNA                             |
| 0,806905  | NPTN-IT1    | lncRNA                             |
| 0,7763012 | AC007878.1  | lncRNA                             |
| 0,7154026 | HELLPAR     | lncRNA                             |
| 0,5402971 | FP671120.7  | lncRNA                             |
| 0,6244656 | EBLN3P      | lncRNA                             |
| 0,624851  | WASH5P      | transcribed_processed_pseudogene   |
| 0,9794449 | FRG1CP      | transcribed_unprocessed_pseudogene |
| 0,0283162 | AC107068.2  | lncRNA                             |
| 0,6128477 | AC008038.1  | processed_pseudogene               |
| 0,9533049 | AC006453.2  | transcribed_unprocessed_pseudogene |
| 0,7201269 | MIR1244-2   | miRNA                              |
| 0,7834471 | AC068587.4  | lncRNA                             |
| 0,9900268 | HSPA14      | protein_coding                     |
| 0,9142106 | AC006460.2  | lncRNA                             |
| 0,3883821 | AL591543.1  | lncRNA                             |
| 0,8854446 | GABPB1-IT1  | lncRNA                             |
| 0,6383874 | POLR2J3     | protein_coding                     |
| 0,645515  | BX890604.2  | lncRNA                             |
| 0,7376181 | NIPBL-DT    | lncRNA                             |
| 0,933129  | AC092353.2  | lncRNA                             |
| 0,5400662 | AL136171.2  | lncRNA                             |
| 0,9998478 | AC026273.1  | transcribed_unprocessed_pseudogene |
| 0,8111745 | NOTCH2NLC   | protein_coding                     |
| 0,166273  | AC119673.2  | lncRNA                             |
| 0,2354584 | AC106845.1  | lncRNA                             |
| 0,6793248 | AC009878.2  | lncRNA                             |
| 0,9792506 | AC012459.1  | lncRNA                             |
| 0,9450135 | AL670729.3  | lncRNA                             |
| 0,1712026 | Z85996.3    | lncRNA                             |
| 0,5504165 | AC097448.1  | lncRNA                             |

**Supplementary Table S3. MED subunits alteration in DCM patients *vs* HS**

| Gene name | logFC         | FC            | p value      |
|-----------|---------------|---------------|--------------|
| MED1      | 0.044         | 1.031         | 0.747        |
| MED4      | -0.155        | -1.113        | 0.318        |
| MED6      | -0.023        | -1.016        | 0.917        |
| MED7      | -0.254        | -1.193        | 0.161        |
| MED8      | -0.164        | -1.120        | 0.349        |
| MED9      | <b>-0.333</b> | <b>-1.260</b> | <b>0.031</b> |
| MED12     | 0.357         | 1.280         | 0.128        |
| MED13     | 0.224         | 1.168         | 0.132        |
| MED13L    | 0.008         | 1.006         | 0.960        |
| MED14     | 0.103         | 1.074         | 0.361        |
| MED15     | 0.033         | 1.023         | 0.860        |
| MED17     | 0.044         | 1.031         | 0.852        |
| MED20     | -0.341        | -1.267        | 0.063        |
| MED21     | -0.216        | -1.161        | 0.258        |
| MED22     | 0.107         | 1.077         | 0.608        |
| MED23     | 0.001         | 1.001         | 0.994        |
| MED24     | 0.050         | 1.035         | 0.774        |
| MED28     | 0.097         | 1.070         | 0.515        |
| MED29     | 0.234         | 1.176         | 0.149        |
| CDK8      | 0.253         | 1.192         | 0.139        |



**Supplementary Table S4. MED subunit organization**

| Module localization | Subunit                                                                             |
|---------------------|-------------------------------------------------------------------------------------|
| Head                | MED6; MED8; MED11;<br>MED17; MED18; MED19;<br>MED20; MED22; MED28;<br>MED29; MED30. |
| Middle              | MED1; MED4; MED7; MED9;<br>MED10; MED14; MED21;<br>MED26; MED31.                    |
| Tail                | MED2; MED3; MED5; MED15;<br>MED16; MED23; MED24;<br>MED25.                          |
| CDK8-kinase         | MED12/MED12L*;<br>MED13/MED13L*;<br>CDK8/19;<br>CYCC.                               |

\* These subunits appear to assemble in a mutually exclusive manner.

For further information on how to interpret these results please access <https://meme-suite.org/meme/doc/tomtom-output-format.html>.  
To get a copy of the MEME software please access <https://meme-suite.org>.

If you use Tomtom in your research, please cite the following paper:

Shobhit Gupta, JA Stamatoyannopoulos, Timothy Bailey and William Stafford Noble, "Quantifying similarity between motifs", *Genome Biology*, **8**(2):R24, 2007. [[full text](#)]

[QUERY MOTIFS](#) | [TARGET DATABASES](#) | [MATCHES](#) | [SETTINGS](#) | [PROGRAM INFORMATION](#) | [RESULTS IN TSV FORMAT](#)  | [RESULTS IN XML FORMAT](#)

## QUERY MOTIFS

[Next](#) [Top](#)

| Database     | ID | Alt. ID | Preview                                                                            | Matches | List                                                                                                                                                             |
|--------------|----|---------|------------------------------------------------------------------------------------|---------|------------------------------------------------------------------------------------------------------------------------------------------------------------------|
| query_motifs | 1  |         |  | 30      | <a href="#">TCF7_HUMAN.H11MO.0.A</a> , <a href="#">ZFP28_HUMAN.H11MO.0.C</a> ,<br><a href="#">CDX2_HUMAN.H11MO.0.A</a> , <a href="#">GATA4_HUMAN.H11MO.0.A</a> , |

## TARGET DATABASES

[Previous](#) [Next](#) [Top](#)

| Database                                | Used | Matched |
|-----------------------------------------|------|---------|
| HOCOMOCov11_core_HUMAN_mono_meme_format | 401  | 30      |

## MATCHES TO 1

[Previous](#) [Next](#) [Top](#)

| Summary                                                                                                                                                                                                             | Optimal Alignment |
|---------------------------------------------------------------------------------------------------------------------------------------------------------------------------------------------------------------------|-------------------|
| <p><b>Name</b> <a href="#">TCF7_HUMAN.H11MO.0.A</a></p> <p><b>Database</b> HOCOMOCov11_core_HUMAN_mono_meme_format</p> <p><b>p-value</b> 1.03e-03</p> <p><b>E-value</b> 4.12e-01</p> <p><b>q-value</b> 4.75e-01</p> |                   |

Overlap

Offset

Orientation

16  
-3  
Reverse Complement

[Show logo download options](#)

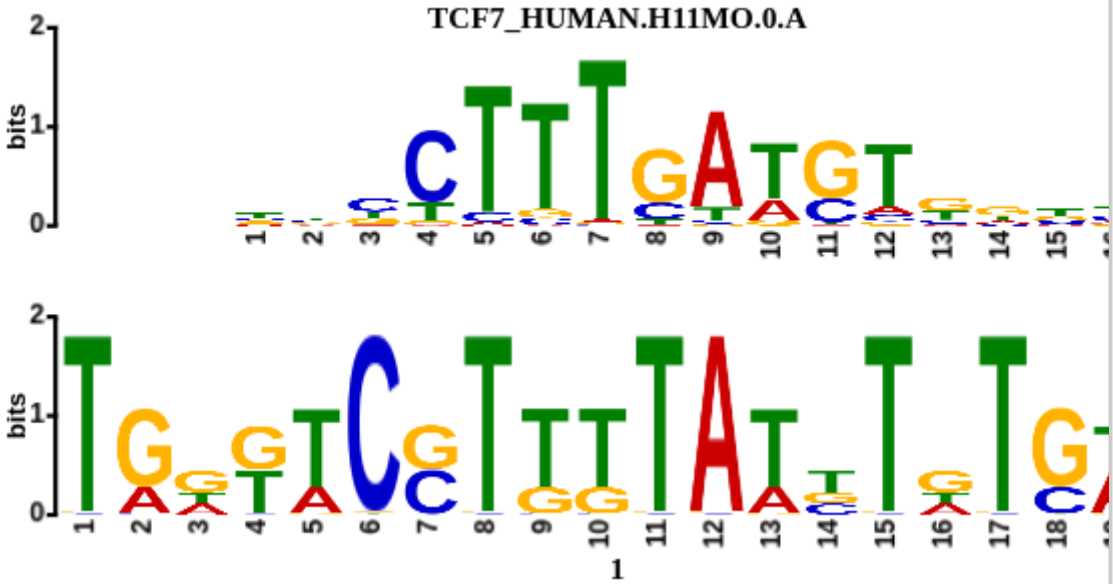

Summary

Name

Database

*p*-value

*E*-value

*q*-value

[ZFP28\\_HUMAN.H11MO.0.C](#)  
HOCOMOCov11\_core\_HUMAN\_mono\_meme\_format  
2.95e-03  
1.18e+00  
4.75e-01

Overlap

Offset

Orientation

17  
-3  
Normal

[Show logo download options](#)

Optimal Alignment

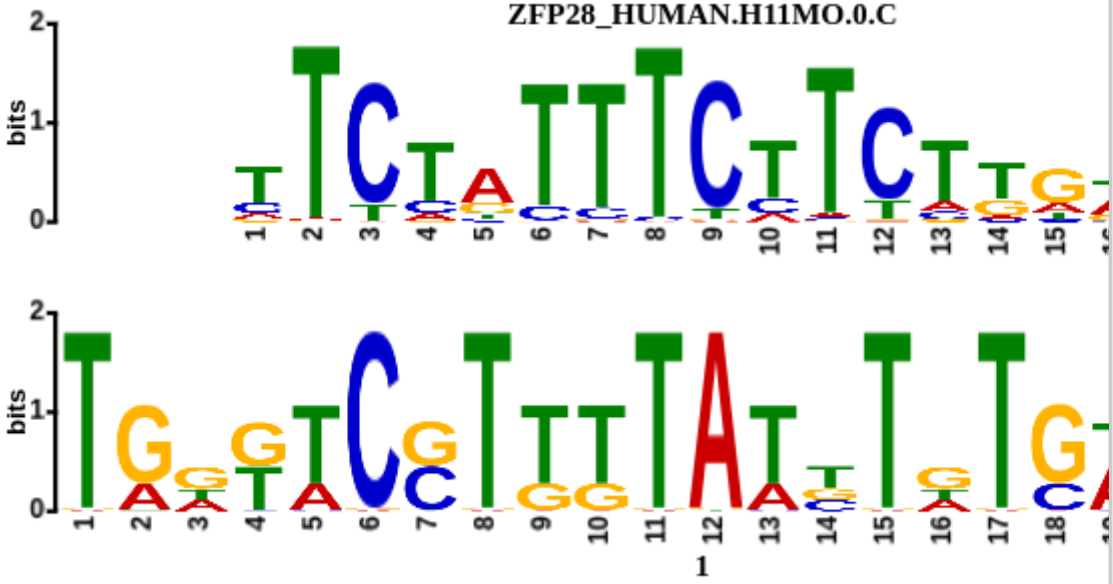

Summary

Name

[CDX2\\_HUMAN.H11MO.0.A](#)

Optimal Alignment

|                 |                                            |
|-----------------|--------------------------------------------|
| Database        | HOCOMOCov11_core_HUMAN_mono_meme_format    |
| <i>p</i> -value | 3.48e-03                                   |
| <i>E</i> -value | 1.40e+00                                   |
| <i>q</i> -value | 4.75e-01                                   |
| Overlap         | 12                                         |
| Offset          | -7                                         |
| Orientation     | Normal                                     |
|                 | <a href="#">Show logo download options</a> |

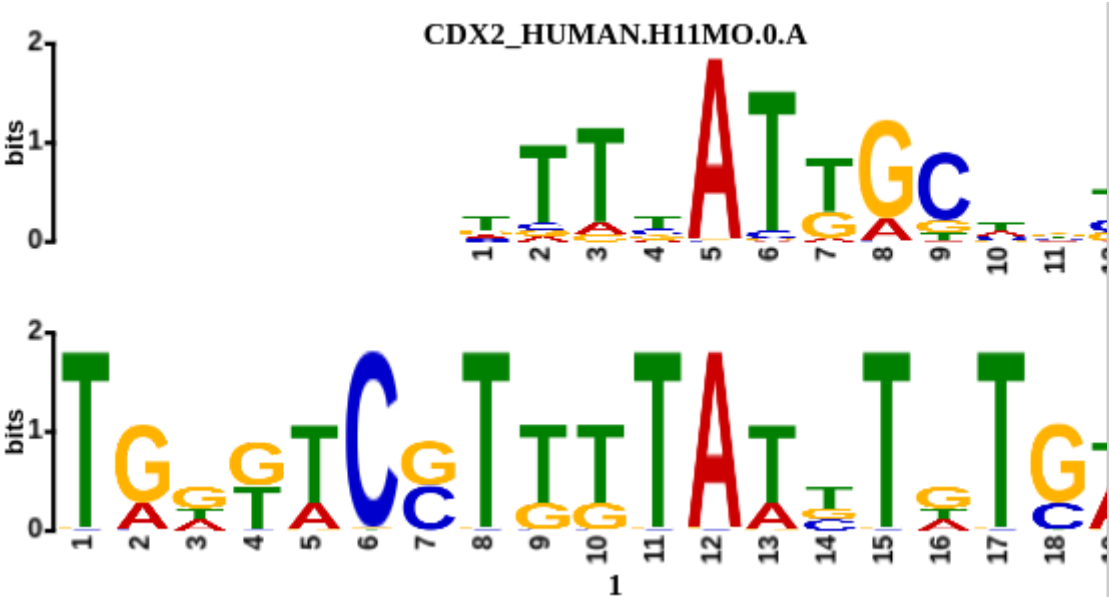

Summary

|                 |                                            |
|-----------------|--------------------------------------------|
| Name            | <a href="#">GATA4_HUMAN.H11MO.0.A</a>      |
| Database        | HOCOMOCov11_core_HUMAN_mono_meme_format    |
| <i>p</i> -value | 3.51e-03                                   |
| <i>E</i> -value | 1.41e+00                                   |
| <i>q</i> -value | 4.75e-01                                   |
| Overlap         | 10                                         |
| Offset          | -7                                         |
| Orientation     | Reverse Complement                         |
|                 | <a href="#">Show logo download options</a> |

Optimal Alignment

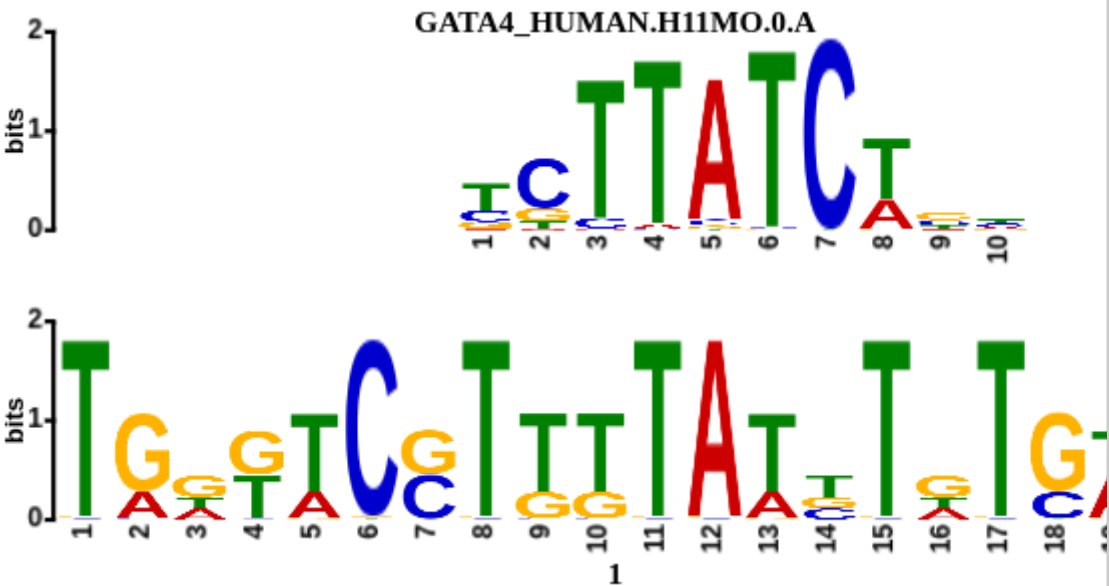

Summary

|      |                                       |
|------|---------------------------------------|
| Name | <a href="#">TF7L2_HUMAN.H11MO.0.A</a> |
|------|---------------------------------------|

|             |                                            |
|-------------|--------------------------------------------|
| Database    | HOCOMOCov11_core_HUMAN_mono_meme_format    |
| p-value     | 4.08e-03                                   |
| E-value     | 1.63e+00                                   |
| q-value     | 4.75e-01                                   |
| Overlap     | 13                                         |
| Offset      | -4                                         |
| Orientation | Normal                                     |
|             | <a href="#">Show logo download options</a> |

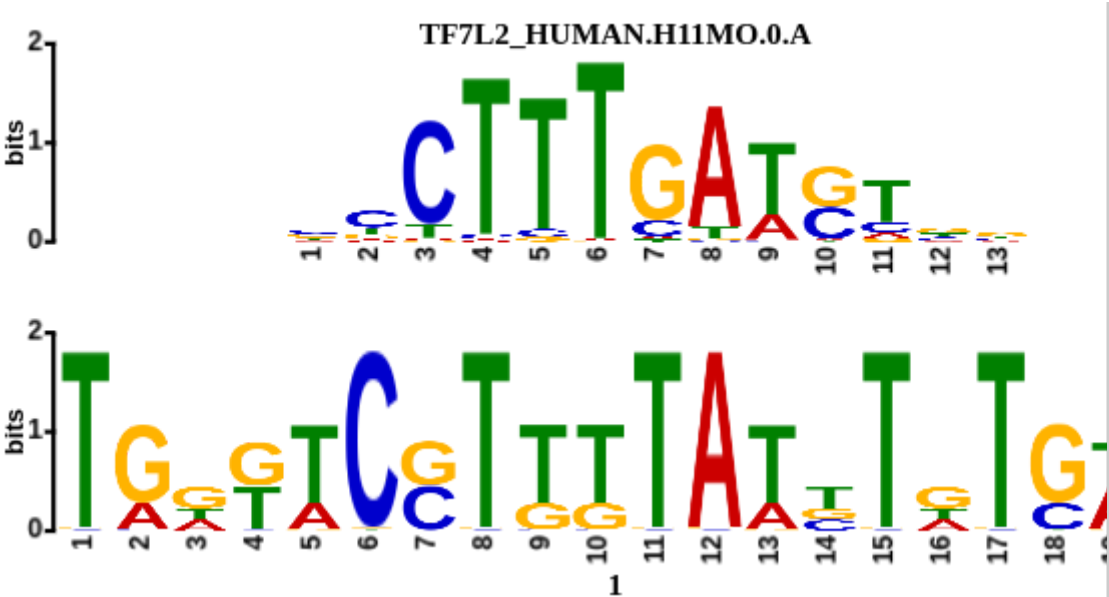

Summary

|             |                                            |
|-------------|--------------------------------------------|
| Name        | <a href="#">ZIM3_HUMAN.H11MO.0.C</a>       |
| Database    | HOCOMOCov11_core_HUMAN_mono_meme_format    |
| p-value     | 4.54e-03                                   |
| E-value     | 1.82e+00                                   |
| q-value     | 4.75e-01                                   |
| Overlap     | 17                                         |
| Offset      | 2                                          |
| Orientation | Normal                                     |
|             | <a href="#">Show logo download options</a> |

Optimal Alignment

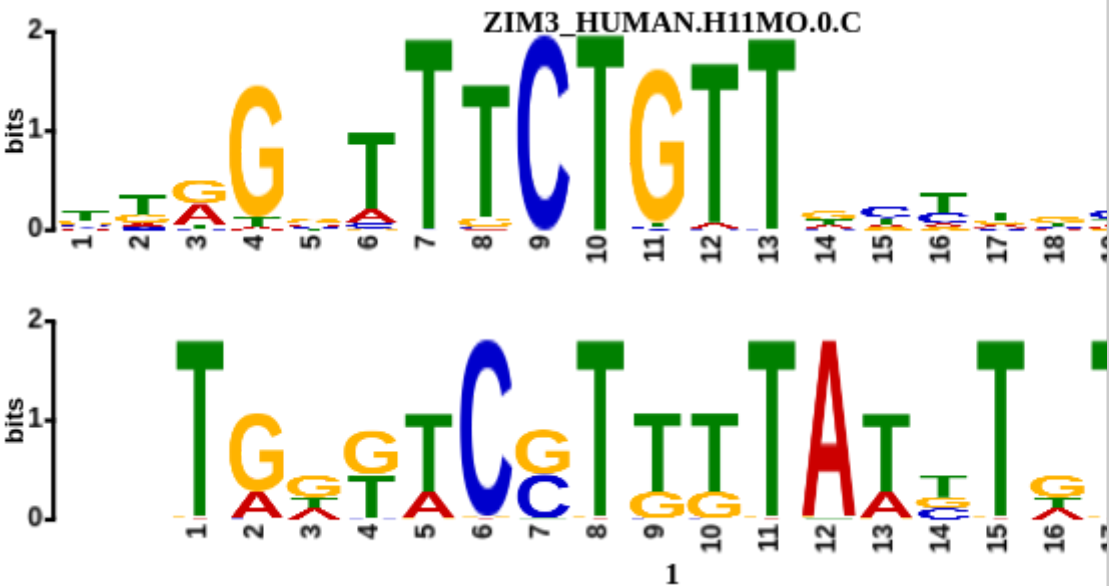

Summary

|      |                                      |
|------|--------------------------------------|
| Name | <a href="#">ANDR_HUMAN.H11MO.0.A</a> |
|------|--------------------------------------|

Database HOCOMOCov11\_core\_HUMAN\_mono\_meme\_format

p-value 4.88e-03

E-value 1.96e+00

q-value 4.75e-01

Overlap 18

Offset 0

Orientation Normal

[Show logo download options](#)

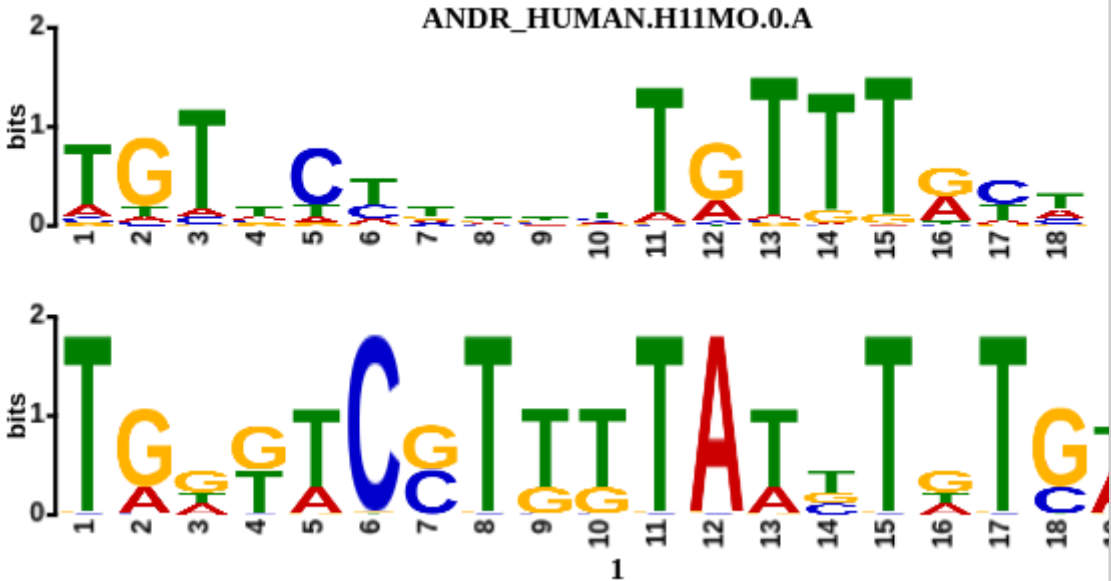

Summary

Name [TF7L1\\_HUMAN.H11MO.0.B](#)

Database HOCOMOCov11\_core\_HUMAN\_mono\_meme\_format

p-value 6.24e-03

E-value 2.50e+00

q-value 4.75e-01

Overlap 13

Offset -3

Orientation Normal

[Show logo download options](#)

Optimal Alignment

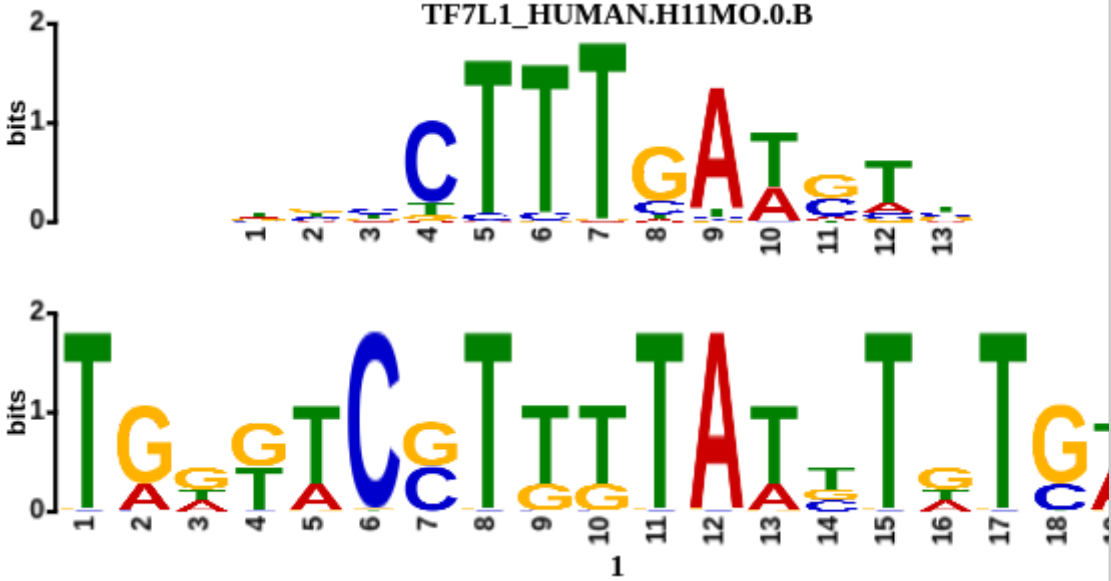

Summary

Name [HXB13\\_HUMAN.H11MO.0.A](#)

Optimal Alignment

|             |                                            |
|-------------|--------------------------------------------|
| Database    | HOCOMOCov11_core_HUMAN_mono_meme_format    |
| p-value     | 6.25e-03                                   |
| E-value     | 2.51e+00                                   |
| q-value     | 4.75e-01                                   |
| Overlap     | 10                                         |
| Offset      | -7                                         |
| Orientation | Normal                                     |
|             | <a href="#">Show logo download options</a> |

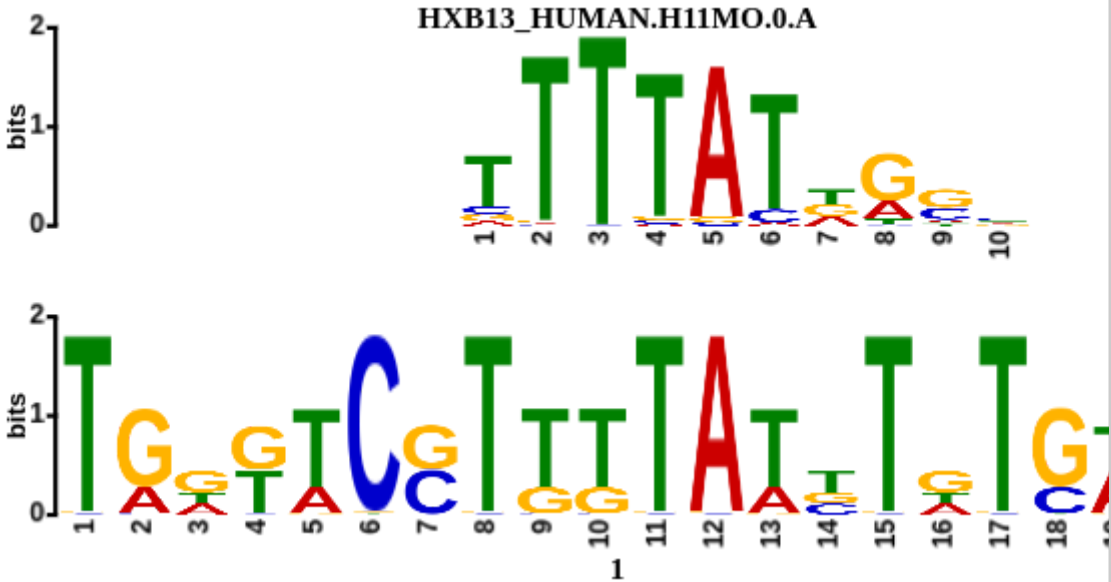

Summary

|             |                                            |
|-------------|--------------------------------------------|
| Name        | <a href="#">GATA3_HUMAN.H11MO.0.A</a>      |
| Database    | HOCOMOCov11_core_HUMAN_mono_meme_format    |
| p-value     | 6.83e-03                                   |
| E-value     | 2.74e+00                                   |
| q-value     | 4.75e-01                                   |
| Overlap     | 11                                         |
| Offset      | -4                                         |
| Orientation | Reverse Complement                         |
|             | <a href="#">Show logo download options</a> |

Optimal Alignment

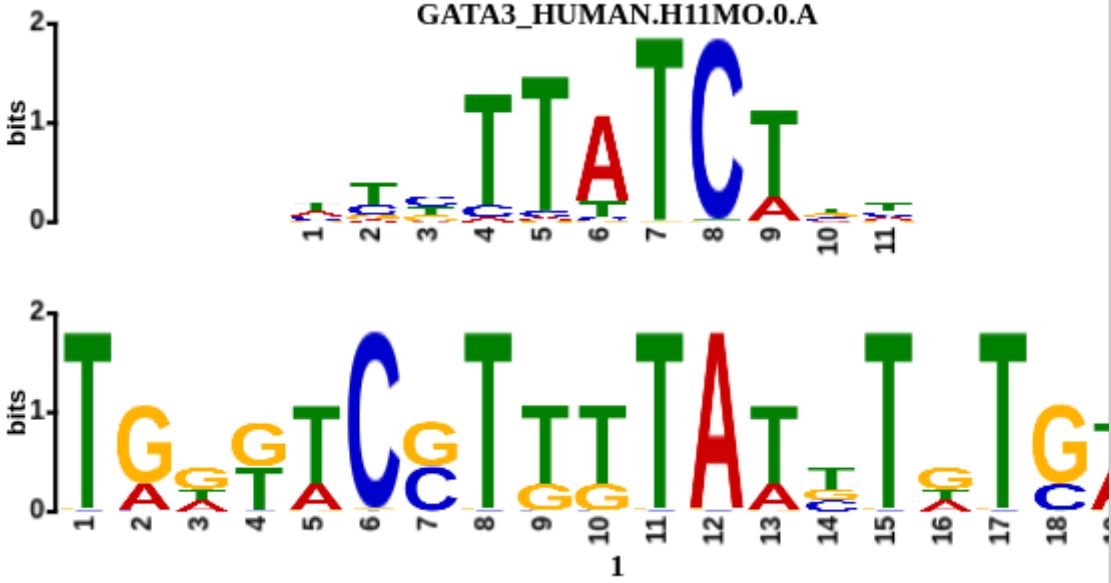

Summary

|      |                                      |
|------|--------------------------------------|
| Name | <a href="#">CDX1_HUMAN.H11MO.0.C</a> |
|------|--------------------------------------|

Optimal Alignment

Database HOCOMOCov11\_core\_HUMAN\_mono\_meme\_format

p-value 7.11e-03

E-value 2.85e+00

q-value 4.75e-01

Overlap 8

Offset -11

Orientation Normal

[Show logo download options](#)

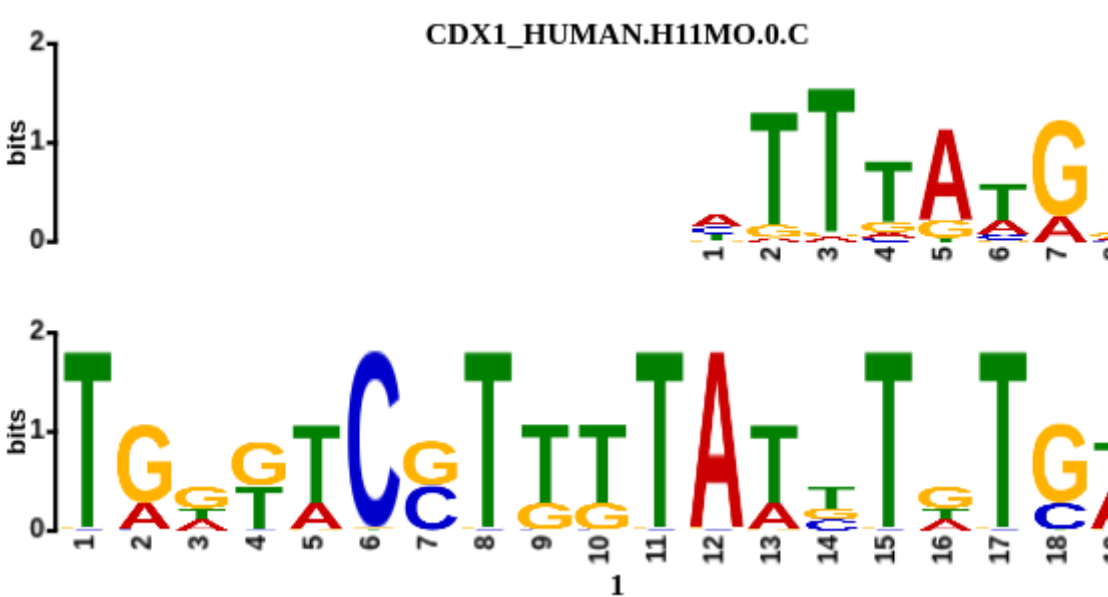

Summary

Name [ZNF41\\_HUMAN.H11MO.0.C](#)

Database HOCOMOCov11\_core\_HUMAN\_mono\_meme\_format

p-value 7.17e-03

E-value 2.88e+00

q-value 4.75e-01

Overlap 20

Offset 4

Orientation Reverse Complement

[Show logo download options](#)

Optimal Alignment

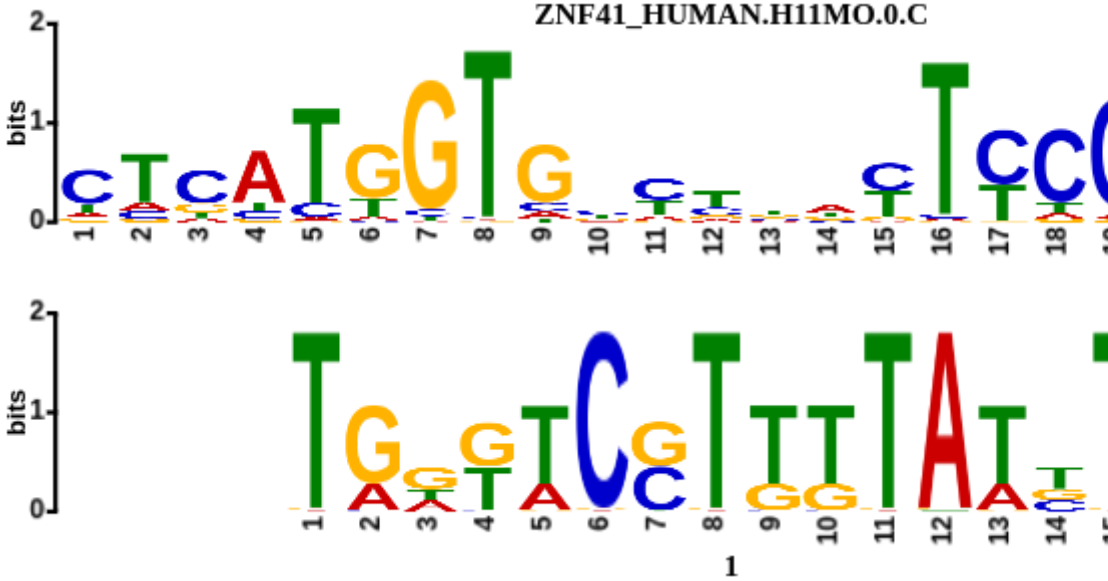

Summary

Name [HXA10\\_HUMAN.H11MO.0.C](#)

Optimal Alignment



|                 |                                            |
|-----------------|--------------------------------------------|
| Database        | HOCOMOCov11_core_HUMAN_mono_meme_format    |
| <i>p</i> -value | 9.57e-03                                   |
| <i>E</i> -value | 3.84e+00                                   |
| <i>q</i> -value | 5.84e-01                                   |
| Overlap         | 12                                         |
| Offset          | -7                                         |
| Orientation     | Normal                                     |
|                 | <a href="#">Show logo download options</a> |

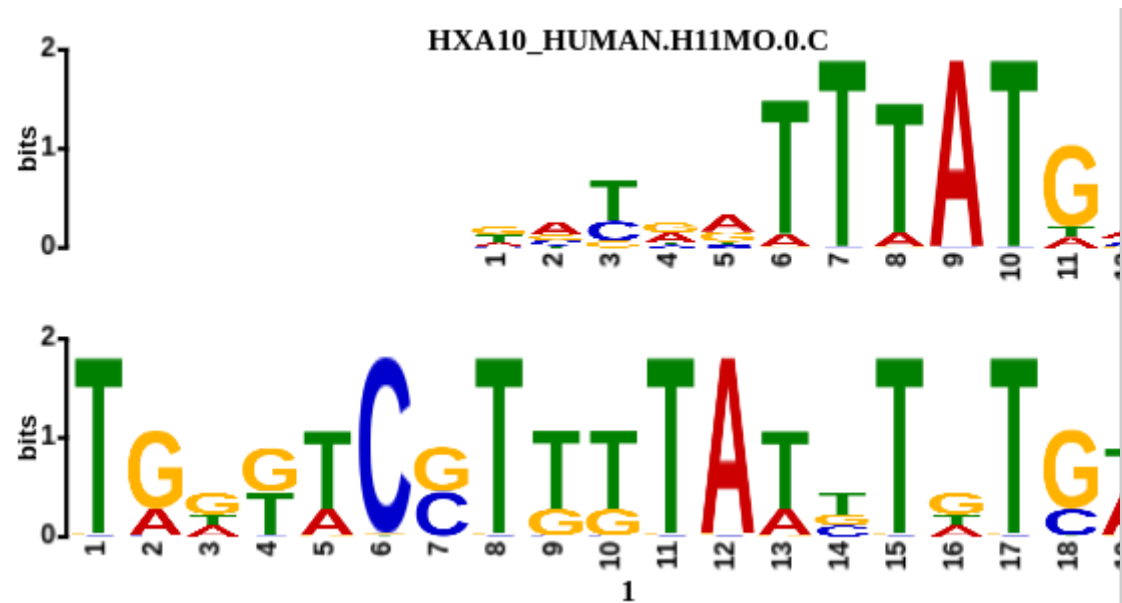

## Summary

|                 |                                            |
|-----------------|--------------------------------------------|
| Name            | <a href="#">HXA13_HUMAN.H11MO.0.C</a>      |
| Database        | HOCOMOCov11_core_HUMAN_mono_meme_format    |
| <i>p</i> -value | 1.07e-02                                   |
| <i>E</i> -value | 4.29e+00                                   |
| <i>q</i> -value | 5.85e-01                                   |
| Overlap         | 11                                         |
| Offset          | -5                                         |
| Orientation     | Normal                                     |
|                 | <a href="#">Show logo download options</a> |

## Optimal Alignment

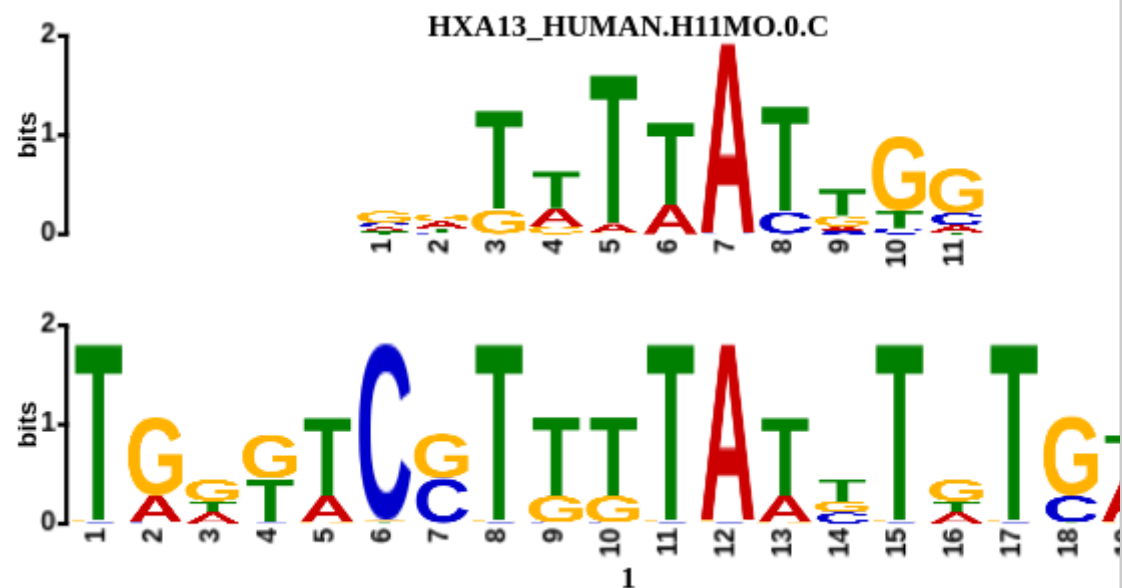

## Summary

|      |                                       |
|------|---------------------------------------|
| Name | <a href="#">ZN274_HUMAN.H11MO.0.A</a> |
|------|---------------------------------------|

|                 |                                            |
|-----------------|--------------------------------------------|
| Database        | HOCOMOCov11_core_HUMAN_mono_meme_format    |
| <i>p</i> -value | 1.14e-02                                   |
| <i>E</i> -value | 4.58e+00                                   |
| <i>q</i> -value | 5.85e-01                                   |
| Overlap         | 18                                         |
| Offset          | 2                                          |
| Orientation     | Reverse Complement                         |
|                 | <a href="#">Show logo download options</a> |

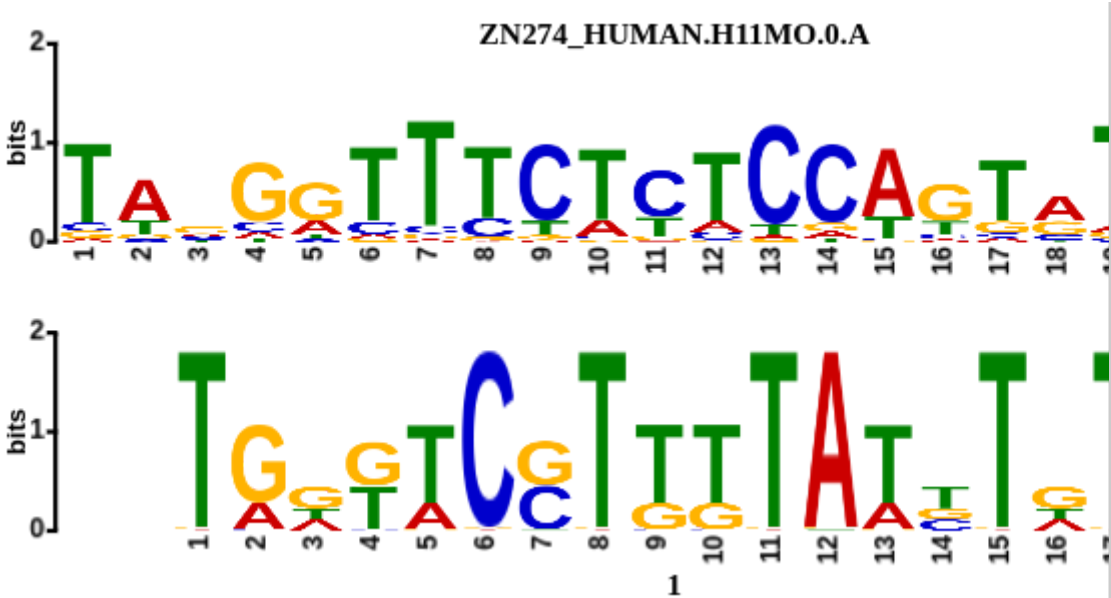

Summary

|                 |                                            |
|-----------------|--------------------------------------------|
| Name            | <a href="#">FOXO1_HUMAN.H11MO.0.A</a>      |
| Database        | HOCOMOCov11_core_HUMAN_mono_meme_format    |
| <i>p</i> -value | 1.29e-02                                   |
| <i>E</i> -value | 5.17e+00                                   |
| <i>q</i> -value | 5.85e-01                                   |
| Overlap         | 12                                         |
| Offset          | -3                                         |
| Orientation     | Normal                                     |
|                 | <a href="#">Show logo download options</a> |

Optimal Alignment

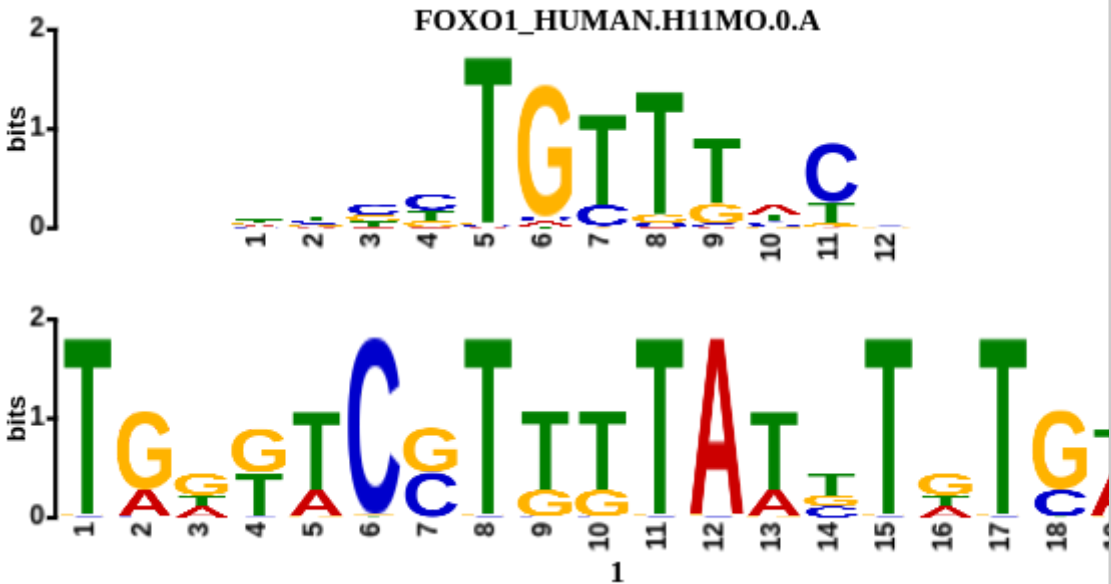

Summary

|      |                                       |
|------|---------------------------------------|
| Name | <a href="#">PRRX2_HUMAN.H11MO.0.C</a> |
|------|---------------------------------------|

|                 |                                            |
|-----------------|--------------------------------------------|
| Database        | HOCOMOCov11_core_HUMAN_mono_meme_format    |
| <i>p</i> -value | 1.36e-02                                   |
| <i>E</i> -value | 5.44e+00                                   |
| <i>q</i> -value | 5.85e-01                                   |
| Overlap         | 7                                          |
| Offset          | -9                                         |
| Orientation     | Normal                                     |
|                 | <a href="#">Show logo download options</a> |

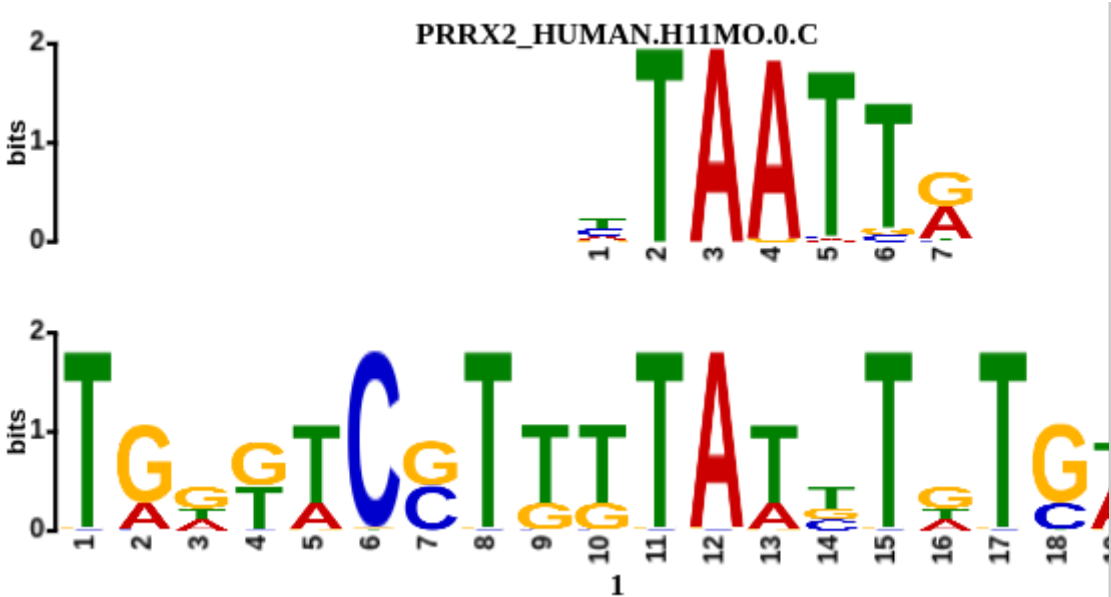

### Summary

|                 |                                            |
|-----------------|--------------------------------------------|
| Name            | <a href="#">FOXJ3_HUMAN.H11MO.0.A</a>      |
| Database        | HOCOMOCov11_core_HUMAN_mono_meme_format    |
| <i>p</i> -value | 1.40e-02                                   |
| <i>E</i> -value | 5.61e+00                                   |
| <i>q</i> -value | 5.85e-01                                   |
| Overlap         | 13                                         |
| Offset          | -4                                         |
| Orientation     | Normal                                     |
|                 | <a href="#">Show logo download options</a> |

### Optimal Alignment

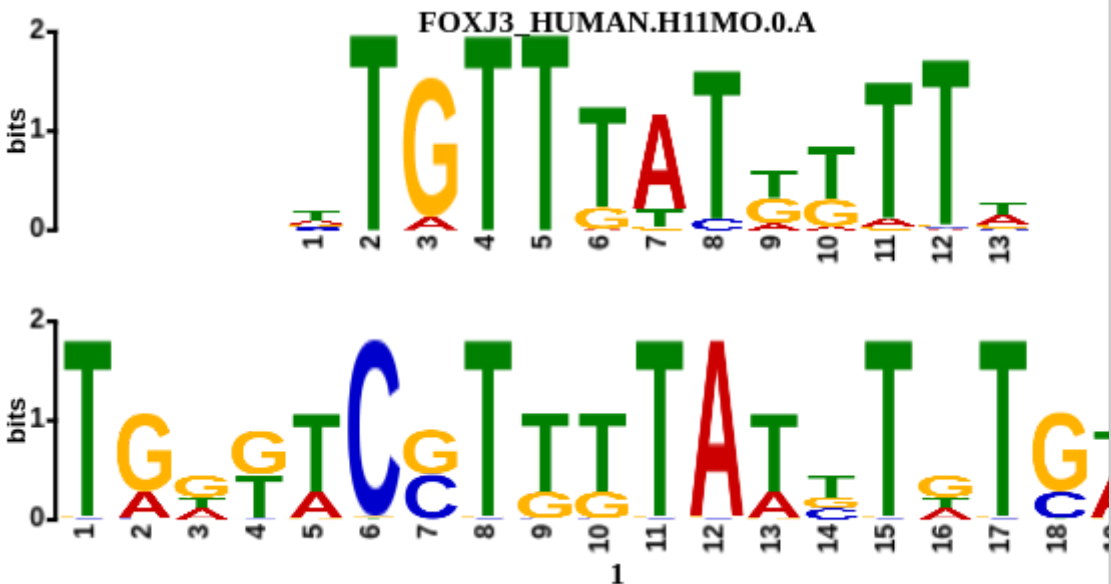

### Summary

|      |                                      |
|------|--------------------------------------|
| Name | <a href="#">PIT1_HUMAN.H11MO.0.C</a> |
|------|--------------------------------------|

### Optimal Alignment

|                 |                                            |
|-----------------|--------------------------------------------|
| Database        | HOCOMOCov11_core_HUMAN_mono_meme_format    |
| <i>p</i> -value | 1.40e-02                                   |
| <i>E</i> -value | 5.61e+00                                   |
| <i>q</i> -value | 5.85e-01                                   |
| Overlap         | 13                                         |
| Offset          | -7                                         |
| Orientation     | Reverse Complement                         |
|                 | <a href="#">Show logo download options</a> |

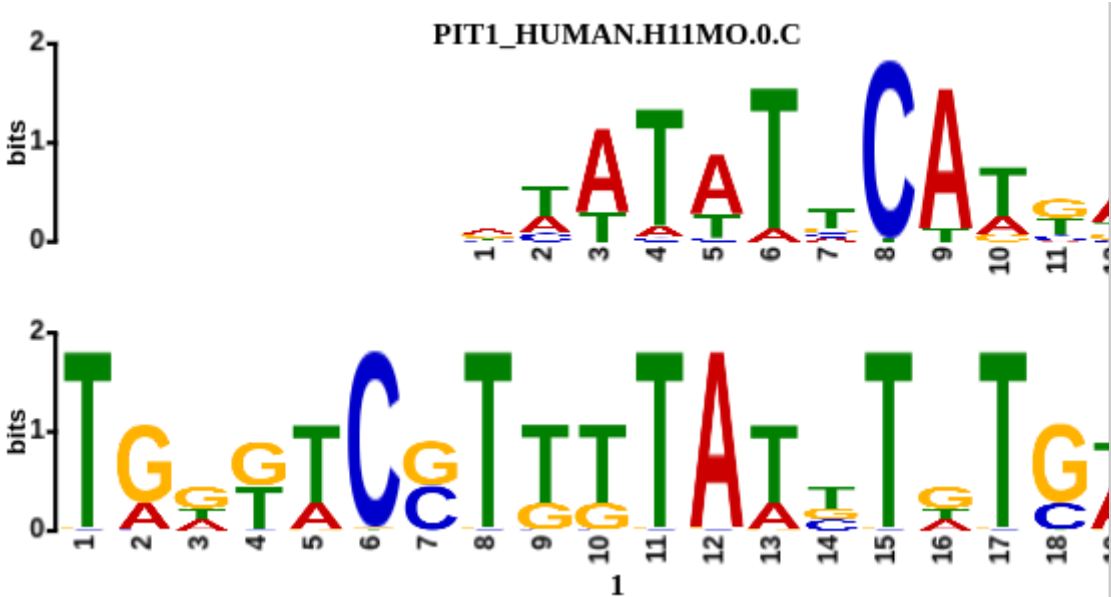

#### Summary

|                 |                                            |
|-----------------|--------------------------------------------|
| Name            | <a href="#">TBP_HUMAN.H11MO.0.A</a>        |
| Database        | HOCOMOCov11_core_HUMAN_mono_meme_format    |
| <i>p</i> -value | 1.50e-02                                   |
| <i>E</i> -value | 6.00e+00                                   |
| <i>q</i> -value | 5.94e-01                                   |
| Overlap         | 10                                         |
| Offset          | -5                                         |
| Orientation     | Reverse Complement                         |
|                 | <a href="#">Show logo download options</a> |

#### Optimal Alignment

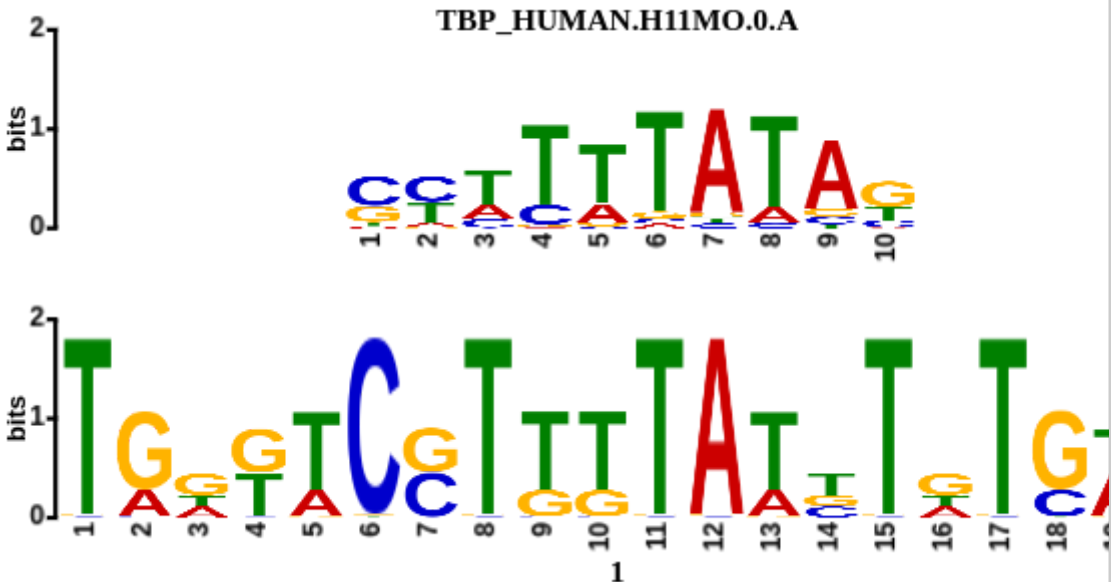

#### Summary

|      |                                       |
|------|---------------------------------------|
| Name | <a href="#">FOXP1_HUMAN.H11MO.0.A</a> |
|------|---------------------------------------|

Database HOCOMOCov11\_core\_HUMAN\_mono\_meme\_format

p-value 1.60e-02

E-value 6.40e+00

q-value 6.03e-01

Overlap 10

Offset 0

Orientation Normal

[Show logo download options](#)

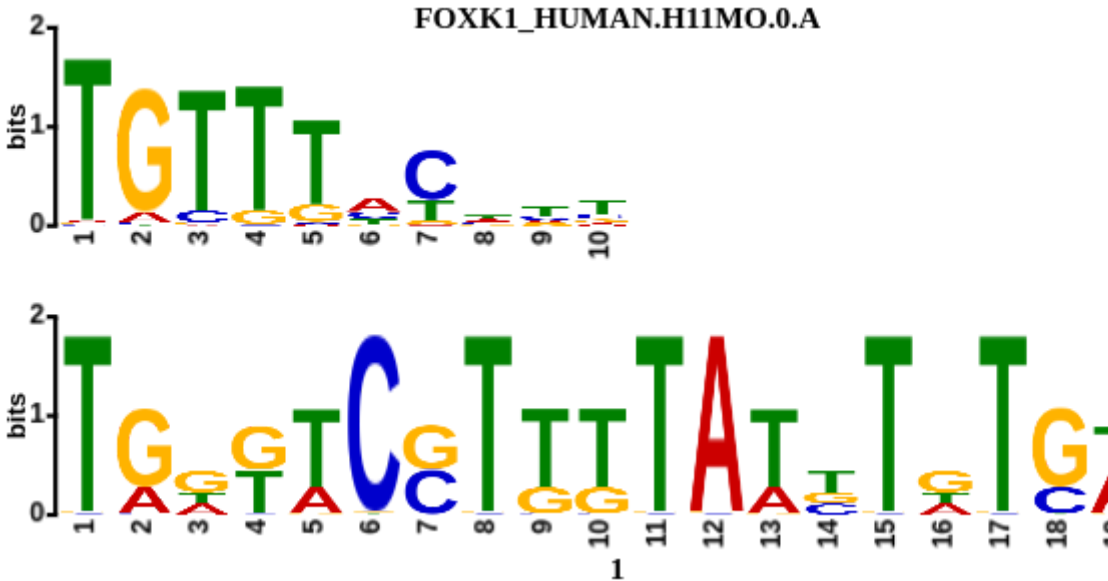

Summary

Name [PO2F1\\_HUMAN.H11MO.0.C](#)

Database HOCOMOCov11\_core\_HUMAN\_mono\_meme\_format

p-value 1.69e-02

E-value 6.78e+00

q-value 6.03e-01

Overlap 15

Offset 1

Orientation Reverse Complement

[Show logo download options](#)

Optimal Alignment

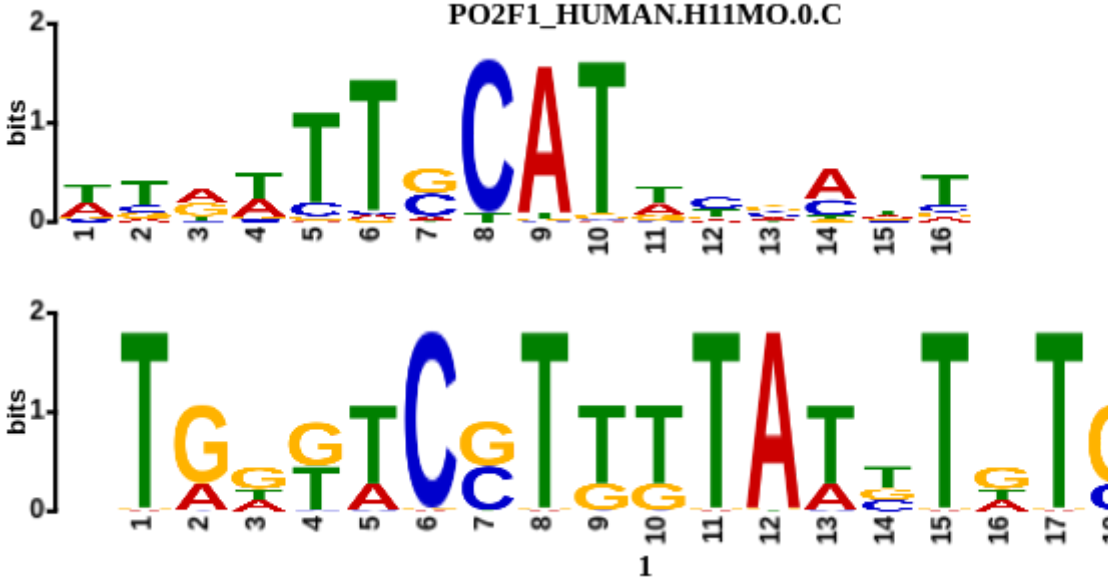

Summary

Name [AIRE\\_HUMAN.H11MO.0.C](#)

Optimal Alignment

|                 |                                            |
|-----------------|--------------------------------------------|
| Database        | HOCOMOCov11_core_HUMAN_mono_meme_format    |
| <i>p</i> -value | 1.75e-02                                   |
| <i>E</i> -value | 7.01e+00                                   |
| <i>q</i> -value | 6.03e-01                                   |
| Overlap         | 18                                         |
| Offset          | -2                                         |
| Orientation     | Normal                                     |
|                 | <a href="#">Show logo download options</a> |

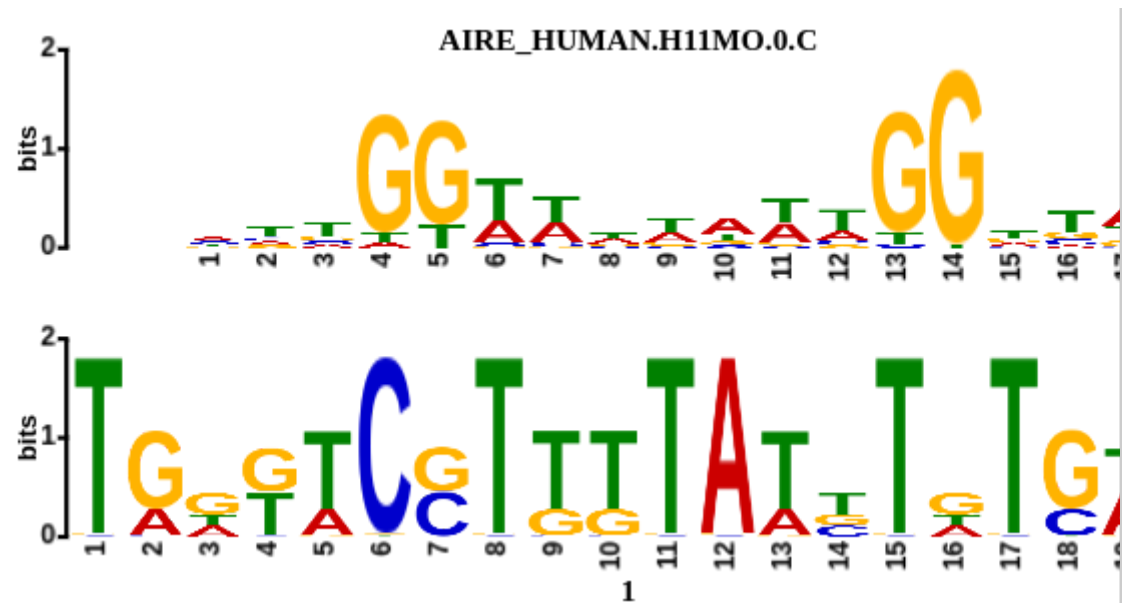

Summary

|                 |                                            |
|-----------------|--------------------------------------------|
| Name            | <a href="#">Z354A_HUMAN.H11MO.0.C</a>      |
| Database        | HOCOMOCov11_core_HUMAN_mono_meme_format    |
| <i>p</i> -value | 2.12e-02                                   |
| <i>E</i> -value | 8.51e+00                                   |
| <i>q</i> -value | 6.44e-01                                   |
| Overlap         | 20                                         |
| Offset          | 2                                          |
| Orientation     | Normal                                     |
|                 | <a href="#">Show logo download options</a> |

Optimal Alignment

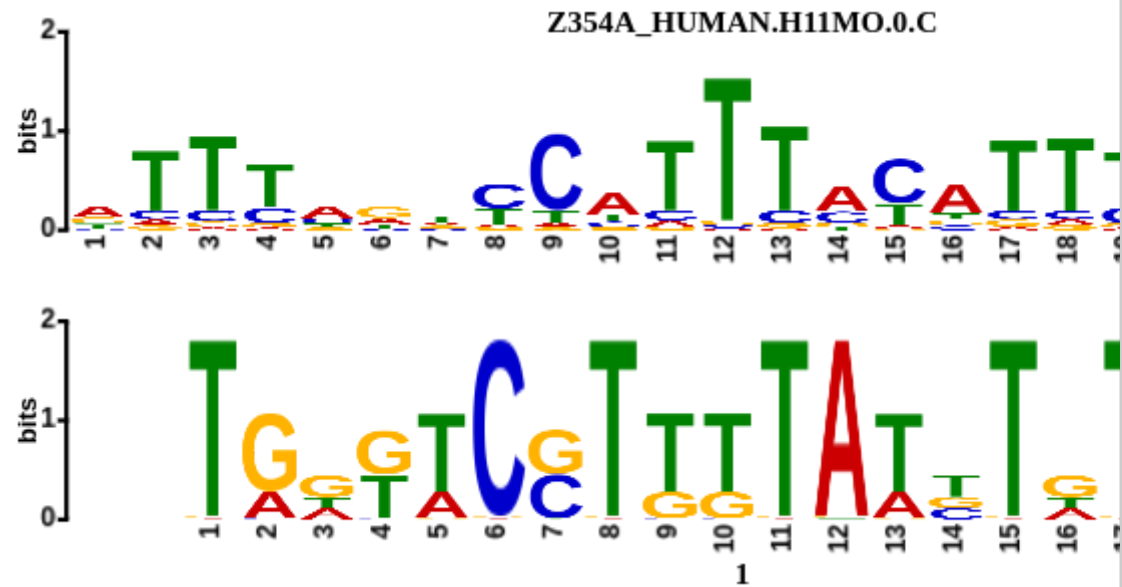

Summary

|      |                                      |
|------|--------------------------------------|
| Name | <a href="#">LEF1_HUMAN.H11MO.0.A</a> |
|------|--------------------------------------|

Optimal Alignment

Database HOCOMOCov11\_core\_HUMAN\_mono\_meme\_format

p-value 2.23e-02

E-value 8.96e+00

q-value 6.44e-01

Overlap 14

Offset -4

Orientation Normal

[Show logo download options](#)

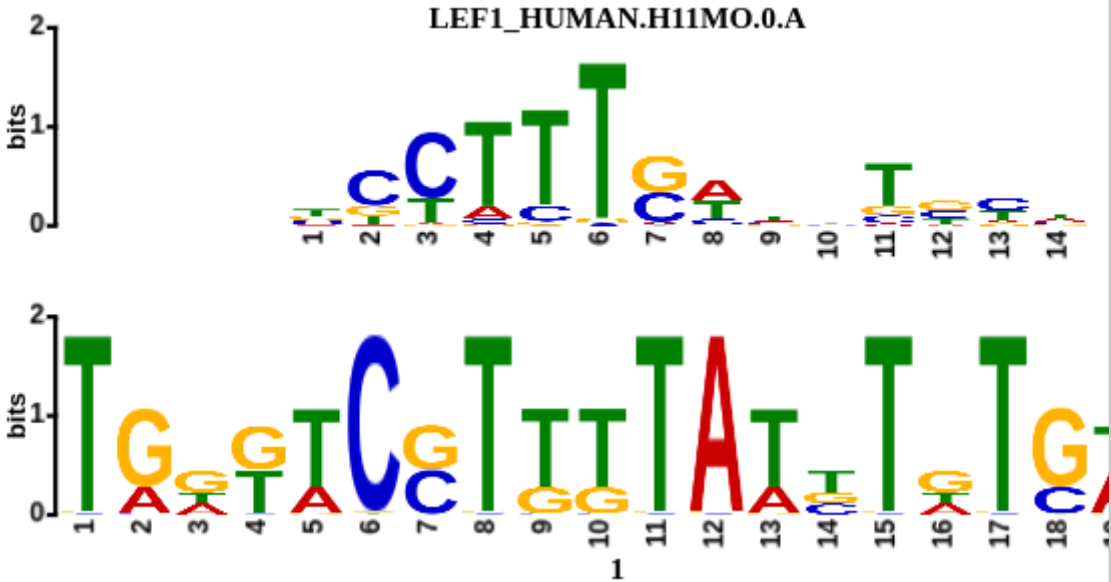

Summary

Name [MEF2A\\_HUMAN.H11MO.0.A](#)

Database HOCOMOCov11\_core\_HUMAN\_mono\_meme\_format

p-value 2.28e-02

E-value 9.16e+00

q-value 6.44e-01

Overlap 13

Offset -7

Orientation Normal

[Show logo download options](#)

Optimal Alignment

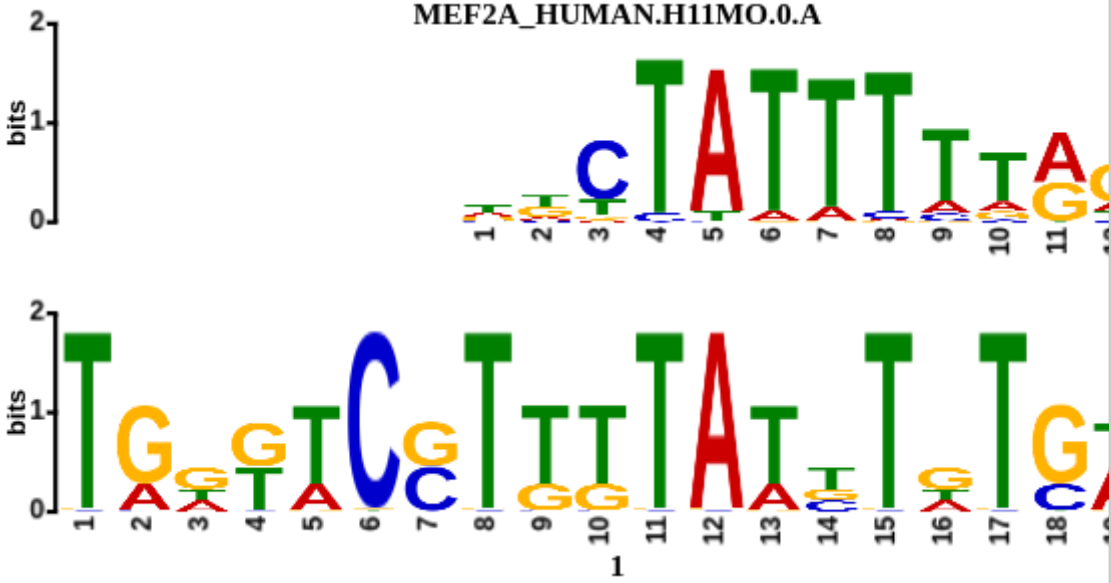

Summary

Name [OVOL1\\_HUMAN.H11MO.0.C](#)

|                 |                                            |
|-----------------|--------------------------------------------|
| Database        | HOCOMOCov11_core_HUMAN_mono_meme_format    |
| <i>p</i> -value | 2.29e-02                                   |
| <i>E</i> -value | 9.18e+00                                   |
| <i>q</i> -value | 6.44e-01                                   |
| Overlap         | 9                                          |
| Offset          | -8                                         |
| Orientation     | Normal                                     |
|                 | <a href="#">Show logo download options</a> |

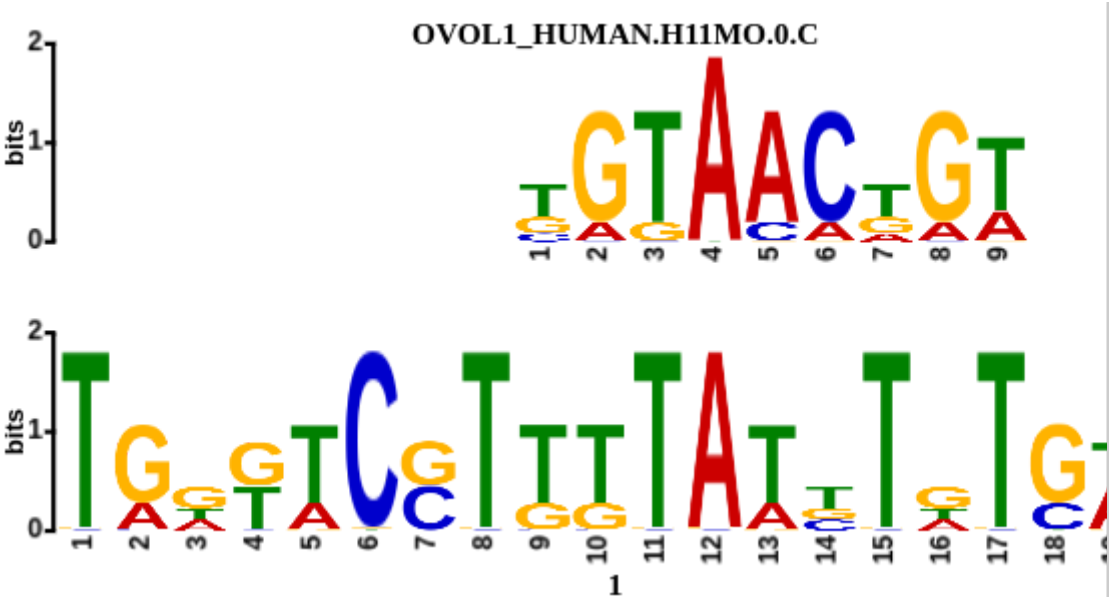

Summary

|                 |                                            |
|-----------------|--------------------------------------------|
| Name            | <a href="#">HXC9_HUMAN.H11MO.0.C</a>       |
| Database        | HOCOMOCov11_core_HUMAN_mono_meme_format    |
| <i>p</i> -value | 2.32e-02                                   |
| <i>E</i> -value | 9.32e+00                                   |
| <i>q</i> -value | 6.44e-01                                   |
| Overlap         | 10                                         |
| Offset          | -7                                         |
| Orientation     | Normal                                     |
|                 | <a href="#">Show logo download options</a> |

Optimal Alignment

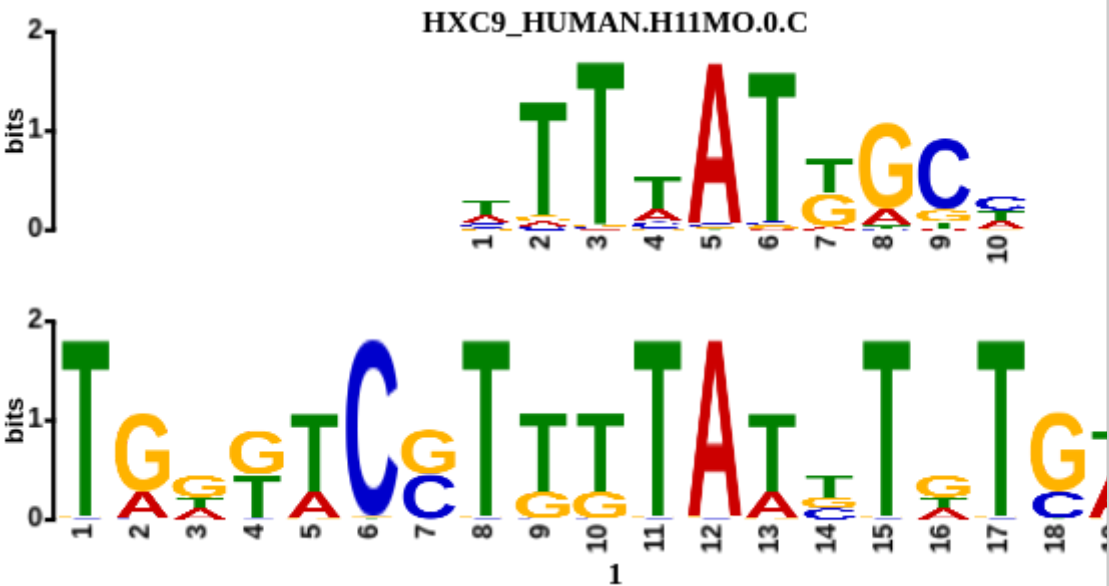

Summary

|      |                                      |
|------|--------------------------------------|
| Name | <a href="#">HNF6_HUMAN.H11MO.0.B</a> |
|------|--------------------------------------|



Database HOCOMOCov11\_core\_HUMAN\_mono\_meme\_format

*p*-value 2.35e-02

*E*-value 9.44e+00

*q*-value 6.44e-01

Overlap 11

Offset -8

Orientation Normal

[Show logo download options](#)

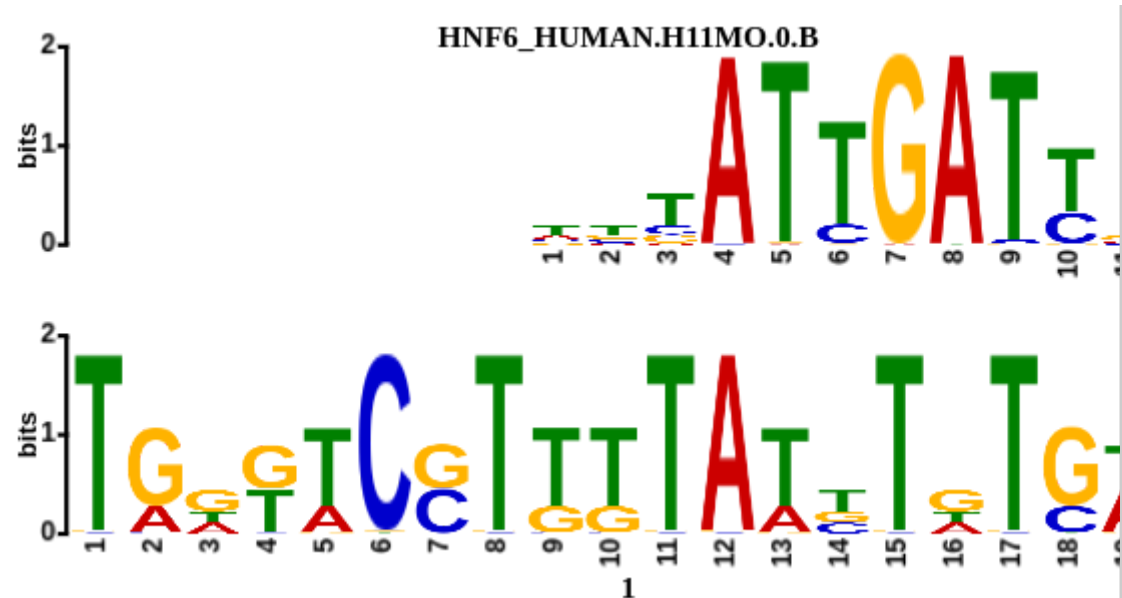

## Summary

Name [HXB7\\_HUMAN.H11MO.0.C](#)

Database HOCOMOCov11\_core\_HUMAN\_mono\_meme\_format

*p*-value 2.47e-02

*E*-value 9.91e+00

*q*-value 6.54e-01

Overlap 10

Offset -8

Orientation Normal

[Show logo download options](#)

## Optimal Alignment

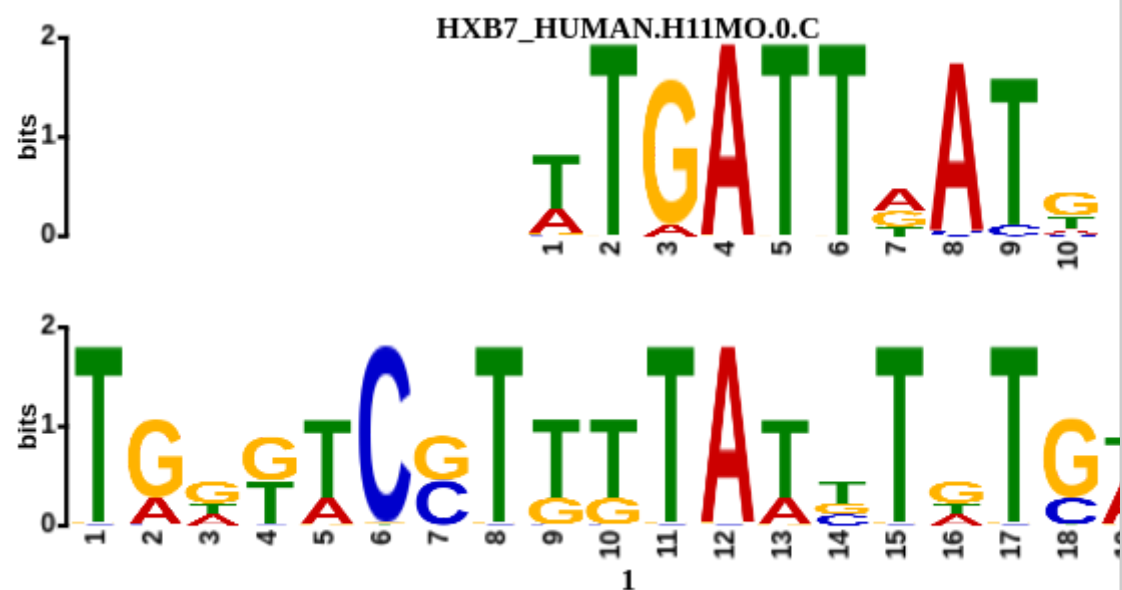

## Alphabet

**Source:** the query file

| Name     | Bg.   |   |   |   | Bg.   | Name    |
|----------|-------|---|---|---|-------|---------|
| Adenine  | 0.222 | A | ~ | T | 0.222 | Thymine |
| Cytosine | 0.278 | C | ~ | G | 0.278 | Guanine |

## Other Settings

|                         |                                                                              |
|-------------------------|------------------------------------------------------------------------------|
| <b>Strand Handling</b>  | Motifs may be reverse complemented before comparison to find a better match. |
| <b>Distance Measure</b> | Pearson correlation coefficient                                              |
| <b>Match Threshold</b>  | Matches must have a <i>E</i> -value of 10 or smaller.                        |

[Previous](#) [Top](#)

### Tomtom version

5.3.2 (Release date: Sat Feb 6 16:38:33 2021 -0800)

### Reference

Shobhit Gupta, JA Stamatoyannopoulos, Timothy Bailey and William Stafford Noble, "Quantifying similarity between motifs", *Genome Biology*, **8**(2):R24, 2007.

### Command line

```
tomtom -no-ssc -oc . -verbosity 1 -min-overlap 5 -mi 1 -dist pearson -evaluate -thresh 10.0 -time 300 query_motifs
```

Result calculation took 1.759 seconds

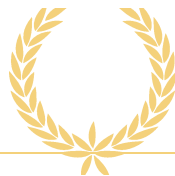

We certify that the following article

## Familial dilated cardiomyopathy: a novel MED9 short isoform identification

Monica Franzese, Mario Zanfardino, Andrea Soricelli, Annapaola Coppola, Ciro Maiello, Marco Salvatore,  
Concetta Schiano \*, Claudio Napoli

has undergone English language editing by MDPI. The text has been checked for correct use of grammar and common technical terms, and edited to a level suitable for reporting research in a scholarly journal.

MDPI uses experienced, native English speaking editors. Full details of the editing service can be found at

► <https://www.mdpi.com/authors/english>.

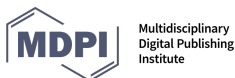

Basel, Switzerland

February 2024

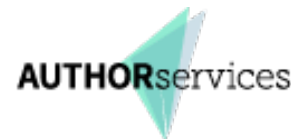

english-77574
